# Supplementary material for: New paradigms for understanding and step changes in treating active and chronic, persistent apicomplexan infections
Source: PubMed Central journal article supplement (PMC4944145; doi:10.1038/srep29179), 2016-07-14
Supplement: srep29179-s2.pdf [file srep29179-s2.pdf]

## Supplement B

### New paradigms for understanding and step changes in treating active and chronic, persistent apicomplexan infections

Martin McPhillie<sup>1\*</sup>, Ying Zhou<sup>2\*</sup>, Kamal El Bissati<sup>2</sup>, Jitender Dubey<sup>3</sup>, Hernan Lorenzi<sup>4</sup>, Michael Capper<sup>5</sup>, Amanda K Lukens<sup>6,7</sup>, Mark Hickman<sup>8</sup>, Stephen Muench<sup>1</sup>, Shiv Kumar Verma<sup>3</sup>, Christopher R. Weber<sup>2</sup>, Kelsey Wheeler<sup>2</sup>, James Gordon<sup>1</sup>, Justin Sanders<sup>9</sup>, Hong Moulton<sup>9</sup>, Kai Wang<sup>10</sup>, Taek-Kyun Kim<sup>10</sup>, Yuqing He<sup>10</sup>, Tatiana Santos<sup>11</sup>, Stuart Woods<sup>12</sup>, Patty Lee<sup>8</sup>, David Donkin<sup>8</sup>, Eric Kim<sup>8</sup>, Laura Fraczek<sup>2</sup>, Joseph Lykins<sup>2</sup>, Farida Esaa<sup>2</sup>, Fatima Alibana-Clouser<sup>2</sup>, Sarah Dovgin<sup>2</sup>, Louis Weiss<sup>11</sup>, Gael Brasseur<sup>14</sup>, Dyann Wirth<sup>6,7</sup>, Michael Kent<sup>9</sup>, Leroy Hood<sup>10</sup>, Brigitte Meunier<sup>13</sup>, Craig W. Roberts<sup>12</sup>, S. Samar Hasnain<sup>5</sup>, Svetlana V. Antonyuk<sup>5,+</sup>, Colin Fishwick<sup>1,+</sup>, and Rima McLeod<sup>2+</sup>

<sup>1</sup> University of Leeds, Leeds, UK

<sup>2</sup> University of Chicago, Chicago, USA

<sup>3</sup> USDA, Beltsville, Maryland, USA

<sup>4</sup> J Craig Venter Institute, Rockville Maryland, USA

<sup>5</sup> University of Liverpool, Liverpool, UK

<sup>6</sup> Harvard School of Public Health, Boston, Massachusetts, USA

<sup>7</sup> The Broad Institute, Boston, Massachusetts, USA

<sup>8</sup> Walter Reed Army Institute of Research, Silver Spring, Maryland, USA

<sup>9</sup> Oregon State University, Corvallis, Oregon, USA

<sup>10</sup> Institute for Systems Biology, Seattle, Washington, USA

<sup>11</sup> Albert Einstein College of Medicine, Bronx, New York, USA

<sup>12</sup> Strathclyde University, Glasgow, Scotland, UK

<sup>13</sup> Institute for Integrative Biology of the Cell (I2BC), Gif-sur-Yvette, France

<sup>14</sup> CNRS, Marseilles, France

\*Equal contributions

+ To whom correspondence should be addressed: Rima McLeod, [rmcleod@uchicago.edu](mailto:rmcleod@uchicago.edu); Colin G. Fishwick, [c.w.g.fishwick@leeds.ac.uk](mailto:c.w.g.fishwick@leeds.ac.uk); Svetlana V. Antonyuk, [antonyuk@liverpool.ac.uk](mailto:antonyuk@liverpool.ac.uk)

Competing financial interests: none

Author contribution statement: M.M conceived the idea of the study, contributed to concept and design, interpreted the results and drafted a part of the manuscript. Y.Z contributed to concept and design, performed experiments, interpreted experimental data, drafted and revised her part of the manuscript. K.E.B. contributed to concept and design, performed experiments, interpreted experimental data, drafted and revised his part of the manuscript. J.D. performed experiments and interpreted experimental data. H.L. carried out the statistical and bioinformatics data analyses, interpretation, and drafted his part of the manuscript. M.C. performed experiments and interpreted experimental data. A.L. performed experiments and interpreted experimental data. M.H. performed experiments and interpreted experimental data. S.M performed experiments and interpreted experimental data. S.K.V performed experiments and interpreted experimental data. C.W. interpreted experimental. K.WH. performed experiments and

interpreted experimental data. J.G. performed experiments and interpreted experimental data. J.S. performed experiments and interpreted experimental data. H.M. carried out the statistical and bioinformatics data analyses, interpretation, and drafted his part of the manuscript. K.WA carried out the statistical and bioinformatics data analyses, interpretation, and drafted his part of the manuscript. T-K.K carried out the statistical and bioinformatics data analyses, interpretation, and drafted his part of the manuscript. Y.H. performed experiments and interpreted experimental data. T.S. performed experiments and interpreted experimental data. S.W. performed experiments and interpreted experimental data. P.L. performed experiments and interpreted experimental data. D.D. performed experiments and interpreted experimental data. E.K. performed experiments and interpreted experimental data. L.F. performed experiments and interpreted experimental data. J.L performed experiments and interpreted experimental data. F.E. performed experiments and interpreted experimental data. F.A-C. performed experiments and interpreted experimental data. S.D performed experiments and interpreted experimental data. L.W. interpreted experimental data. G.B. designed components of the experiment. D.W. interpreted experimental data. M.K. interpreted experimental data. L.H. performed experiments and interpreted experimental data. B.M. designed components of experiments. C.W.R. performed experiments and interpreted experimental data. S.S.H. contributed to concept and design, performed experiments, interpreted experimental data, drafted and revised his part of the manuscript. S.V.A performed experiments and interpreted experimental data. C.F. contributed to concept and design, performed experiments, interpreted experimental data, drafted and revised his part of the manuscript. R.M. conceived the idea of the study, contributed to all concepts and designs, coordinated the study, interpreted the results and drafted the manuscript. All authors reviewed the manuscript.

**Supplemental Large Supporting data in Excel Tables INDEX:**

- 1-Genes with nonsynonymous snps; Go SLIM Analysis
- 2-Transcriptomics of infected HFF over time-HFF
- 3-Transcriptomics of infected HFF over time-EGS
- 4-Transcriptomics-MM6 uninfected/infected EGS
- 5-Transcriptomics-MM6-EGS
- 6-Transcriptomics NSC uninfected/infected EGS
- 7-Transcriptomics NSC-EGS
- 8-MIR SEQ

Supplementary Table S1: T. gondii genes carrying potential change-of-function mutations in EGS but not in GT1, VEG or TgCatBr1 strains compared to reference strain ME49

| Gene ID       | Mutation     | Mutation type                                  | Product Name                                                                           |
|---------------|--------------|------------------------------------------------|----------------------------------------------------------------------------------------|
| TGME49_214850 | p.Asn536Ser  | missense_variant                               | 1-deoxy-D-xylulose 5-phosphate reductoisomerase, putative                              |
| TGME49_214850 | p.Asp273Gly  | missense_variant                               | 1-deoxy-D-xylulose 5-phosphate reductoisomerase, putative                              |
| TGME49_214850 | p.Pro111Thr  | missense_variant                               | 1-deoxy-D-xylulose 5-phosphate reductoisomerase, putative                              |
| TGME49_278110 | p.Ser2717Ile | missense_variant                               | 1,3-beta-glucan synthase component protein                                             |
| TGME49_278110 | p.Ser2526Cys | missense_variant                               | 1,3-beta-glucan synthase component protein                                             |
| TGME49_278110 | p.Glu2108Asp | missense_variant                               | 1,3-beta-glucan synthase component protein                                             |
| TGME49_278110 | p.Val514Ala  | missense_variant                               | 1,3-beta-glucan synthase component protein                                             |
| TGME49_319920 | p.Glu302Asp  | missense_variant                               | 2-oxo acid dehydrogenases acyltransferase (catalytic domain) domain-containing protein |
| TGME49_319920 | p.Asp301Gly  | missense_variant                               | 2-oxo acid dehydrogenases acyltransferase (catalytic domain) domain-containing protein |
| TGME49_280710 | c.740+4C>G   | splice_region_variant                          | 20S proteasome subunit beta 7, putative                                                |
| TGME49_277500 | c.-996A>G    | 5_prime_UTR_premature_start_codon_gain_variant | 26S proteasome regulatory subunit 7, putative                                          |
| TGME49_246970 | p.Thr1292Ile | missense_variant                               | 3'-5' exonuclease domain-containing protein                                            |
| TGME49_246970 | p.Lys1266Thr | missense_variant                               | 3'-5' exonuclease domain-containing protein                                            |
| TGME49_246970 | c.1910+7G>A  | splice_region_variant                          | 3'-5' exonuclease domain-containing protein                                            |
| TGME49_246970 | p.Glu510Asp  | missense_variant                               | 3'-5' exonuclease domain-containing protein                                            |
| TGME49_246970 | p.Gln126Lys  | missense_variant                               | 3'-5' exonuclease domain-containing protein                                            |
| TGME49_246970 | c.-197C>T    | 5_prime_UTR_premature_start_codon_gain_variant | 3'-5' exonuclease domain-containing protein                                            |
| TGME49_250890 | p.Arg10Gly   | missense_variant                               | 3'-5' exonuclease domain-containing protein                                            |
| TGME49_318675 | c.2233-3C>T  | splice_region_variant                          | 3'5'-cyclic nucleotide phosphodiesterase domain-containing protein                     |
| TGME49_224840 | p.Asp198Asn  | missense_variant                               | 3'5'-cyclic nucleotide phosphodiesterase domain-containing protein                     |
| TGME49_224840 | p.Tyr204His  | missense_variant                               | 3'5'-cyclic nucleotide phosphodiesterase domain-containing protein                     |
| TGME49_239620 | p.Ser494Ala  | missense_variant                               | 5'-nucleotidase, C-terminal domain-containing protein                                  |
| TGME49_239620 | c.-1182C>G   | 5_prime_UTR_premature_start_codon_gain_variant | 5'-nucleotidase, C-terminal domain-containing protein                                  |
| TGME49_217590 | p.Val227Glu  | missense_variant                               | 50S ribosomal protein L17, putative                                                    |
| TGME49_217590 | p.Glu300Lys  | missense_variant                               | 50S ribosomal protein L17, putative                                                    |
| TGME49_217590 | p.Lys301Asn  | missense_variant                               | 50S ribosomal protein L17, putative                                                    |
| TGME49_223660 | p.Pro83Ser   | missense_variant                               | 50S ribosomal protein L4, putative                                                     |
| TGME49_223660 | p.His161Pro  | missense_variant                               | 50S ribosomal protein L4, putative                                                     |
| TGME49_223660 | c.2200+8C>T  | splice_region_variant                          | 50S ribosomal protein L4, putative                                                     |
| TGME49_211690 | c.3885-6A>G  | splice_region_variant                          | AAA family protein                                                                     |
| TGME49_239020 | p.Glu1153Asp | missense_variant                               | ABC transporter transmembrane region domain-containing protein                         |
| TGME49_239020 | p.Val799Met  | missense_variant                               | ABC transporter transmembrane region domain-containing protein                         |
| TGME49_239020 | p.Ala773Thr  | missense_variant                               | ABC transporter transmembrane region domain-containing protein                         |
| TGME49_239020 | p.Ala16Thr   | missense_variant                               | ABC transporter transmembrane region domain-containing protein                         |
| TGME49_246600 | c.-1618C>T   | 5_prime_UTR_premature_start_codon_gain_variant | ABC1 family protein                                                                    |
| TGME49_246600 | c.-1747>C    | 5_prime_UTR_premature_start_codon_gain_variant | ABC1 family protein                                                                    |
| TGME49_246600 | p.Lys712Gln  | missense_variant                               | ABC1 family protein                                                                    |
| TGME49_246600 | p.Pro840Leu  | missense_variant                               | ABC1 family protein                                                                    |
| TGME49_301120 | p.Ala11Thr   | missense_variant                               | acetyl-CoA acetyltransferase                                                           |
| TGME49_301120 | c.-387G>T    | 5_prime_UTR_premature_start_codon_gain_variant | acetyl-CoA acetyltransferase                                                           |
| TGME49_301120 | c.-450C>G    | 5_prime_UTR_premature_start_codon_gain_variant | acetyl-CoA acetyltransferase                                                           |
| TGME49_221320 | c.7568+8T>C  | splice_region_variant                          | acetyl-CoA carboxylase ACC1                                                            |
| TGME49_221320 | p.Ala1810Gly | missense_variant                               | acetyl-CoA carboxylase ACC1                                                            |
| TGME49_221320 | p.Ala1068Thr | missense_variant                               | acetyl-CoA carboxylase ACC1                                                            |
| TGME49_218560 | c.9338-6T>G  | splice_region_variant                          | acetyl-coA carboxylase ACC2                                                            |
| TGME49_218560 | c.8743+7A>G  | splice_region_variant                          | acetyl-coA carboxylase ACC2                                                            |
| TGME49_218560 | p.Ser2194Asn | missense_variant                               | acetyl-coA carboxylase ACC2                                                            |
| TGME49_218560 | p.Pro2044Thr | missense_variant                               | acetyl-coA carboxylase ACC2                                                            |
| TGME49_221160 | p.Arg152Gly  | missense_variant                               | acetyltransferase, GNAT family protein                                                 |
| TGME49_221160 | p.Gly110Glu  | missense_variant                               | acetyltransferase, GNAT family protein                                                 |
| TGME49_221160 | p.Gly103Glu  | missense_variant                               | acetyltransferase, GNAT family protein                                                 |
| TGME49_219250 | p.Arg721His  | missense_variant                               | acetyltransferase, GNAT family protein                                                 |
| TGME49_219250 | p.Leu617Pro  | missense_variant                               | acetyltransferase, GNAT family protein                                                 |
| TGME49_219250 | p.Gly426Ser  | missense_variant                               | acetyltransferase, GNAT family protein                                                 |
| TGME49_219180 | p.Asn643Ser  | missense_variant                               | acetyltransferase, GNAT family protein                                                 |
| TGME49_219180 | p.Thr173Met  | missense_variant                               | acetyltransferase, GNAT family protein                                                 |
| TGME49_251490 | p.Pro432Thr  | missense_variant                               | ACR, COG2135 domain-containing protein                                                 |
| TGME49_251490 | p.Pro28Ala   | missense_variant                               | ACR, COG2135 domain-containing protein                                                 |
| TGME49_251490 | p.Arg25Leu   | missense_variant                               | ACR, COG2135 domain-containing protein                                                 |
| TGME49_251490 | c.-353C>G    | 5_prime_UTR_premature_start_codon_gain_variant | ACR, COG2135 domain-containing protein                                                 |
| TGME49_251490 | c.-393C>T    | 5_prime_UTR_premature_start_codon_gain_variant | ACR, COG2135 domain-containing protein                                                 |
| TGME49_251490 | c.-509C>A    | 5_prime_UTR_premature_start_codon_gain_variant | ACR, COG2135 domain-containing protein                                                 |
| TGME49_234670 | p.Leu90Phe   | missense_variant                               | actin-like family protein                                                              |
| TGME49_234670 | p.Asp227Ala  | missense_variant                               | actin-like family protein                                                              |
| TGME49_234670 | p.Leu416Val  | missense_variant                               | actin-like family protein                                                              |
| TGME49_248890 | c.-392C>G    | 5_prime_UTR_premature_start_codon_gain_variant | actin-like protein ALP3b                                                               |
| TGME49_248890 | p.Val507Leu  | missense_variant                               | actin-like protein ALP3b                                                               |
| TGME49_221410 | c.-1237+1G>A | splice_donor_variant                           | actin-like protein ALP4                                                                |
| TGME49_253040 | p.Glu594Gly  | missense_variant                               | actin-related protein ARP4A                                                            |
| TGME49_253040 | p.Asn410Ser  | missense_variant                               | actin-related protein ARP4A                                                            |
| TGME49_253040 | p.Pro365Thr  | missense_variant                               | actin-related protein ARP4A                                                            |
| TGME49_253040 | p.Ser364Phe  | missense_variant                               | actin-related protein ARP4A                                                            |
| TGME49_253040 | p.Gln61Glu   | missense_variant                               | actin-related protein ARP4A                                                            |
| TGME49_253040 | p.Val60Leu   | missense_variant                               | actin-related protein ARP4A                                                            |
| TGME49_253040 | p.Val39Ile   | missense_variant                               | actin-related protein ARP4A                                                            |
| TGME49_249810 | p.Leu33Phe   | missense_variant                               | activating signal cointegrator 1 complex subunit 3, putative                           |
| TGME49_249810 | p.Ala386Thr  | missense_variant                               | activating signal cointegrator 1 complex subunit 3, putative                           |
| TGME49_249810 | p.Leu405His  | missense_variant                               | activating signal cointegrator 1 complex subunit 3, putative                           |
| TGME49_249810 | p.Ala494Val  | missense_variant                               | activating signal cointegrator 1 complex subunit 3, putative                           |
| TGME49_249810 | c.3649+8G>A  | splice_region_variant                          | activating signal cointegrator 1 complex subunit 3, putative                           |
| TGME49_249810 | p.Met1547Arg | missense_variant                               | activating signal cointegrator 1 complex subunit 3, putative                           |

|               |              |                                                |                                                              |
|---------------|--------------|------------------------------------------------|--------------------------------------------------------------|
| TGME49_249810 | p.Ala1659Thr | missense_variant                               | activating signal cointegrator 1 complex subunit 3, putative |
| TGME49_249810 | p.Ser2028Leu | missense_variant                               | activating signal cointegrator 1 complex subunit 3, putative |
| TGME49_210800 | c.728+6G>C   | splice_region_variant                          | activator of hsp90 ATPase, putative                          |
| TGME49_247500 | p.Ala692Ser  | missense_variant                               | acyl-CoA dehydrogenase, middle domain-containing protein     |
| TGME49_251550 | c.*324T>C    | splice_region_variant                          | acyl-coa-binding protein                                     |
| TGME49_246800 | c.-562C>T    | 5_prime_UTR_premature_start_codon_gain_variant | acylaminoacyl-peptidase, putative                            |
| TGME49_246800 | p.Val444Ile  | missense_variant                               | acylaminoacyl-peptidase, putative                            |
| TGME49_246800 | p.Gln766Lys  | missense_variant                               | acylaminoacyl-peptidase, putative                            |
| TGME49_246800 | p.Leu851Phe  | missense_variant                               | acylaminoacyl-peptidase, putative                            |
| TGME49_297640 | p.Pro788Ala  | missense_variant                               | acyltransferase domain-containing protein                    |
| TGME49_297640 | p.Val317Ala  | missense_variant                               | acyltransferase domain-containing protein                    |
| TGME49_297640 | p.Val317Ile  | missense_variant                               | acyltransferase domain-containing protein                    |
| TGME49_297640 | p.His83Gln   | missense_variant                               | acyltransferase domain-containing protein                    |
| TGME49_221940 | c.-1008C>G   | 5_prime_UTR_premature_start_codon_gain_variant | adaptin n terminal region domain-containing protein          |
| TGME49_221522 | c.1297-6C>T  | splice_region_variant                          | adaptor complexes medium subunit family protein              |
| TGME49_215480 | p.Asp456Glu  | missense_variant                               | Adenosine/AMP deaminase domain-containing protein            |
| TGME49_224900 | c.-240C>T    | 5_prime_UTR_premature_start_codon_gain_variant | adenylate kinase, putative                                   |
| TGME49_277760 | p.Asn149Thr  | missense_variant                               | adenylosuccinate lyase, putative                             |
| TGME49_277760 | p.Ala153Thr  | missense_variant                               | adenylosuccinate lyase, putative                             |
| TGME49_224110 | p.Cys286Tyr  | missense_variant                               | adhesion regulating molecule region protein, putative        |
| TGME49_239530 | p.Ser374Thr  | missense_variant                               | alanine-glyoxylate aminotransferase                          |
| TGME49_221380 | c.-867C>G    | 5_prime_UTR_premature_start_codon_gain_variant | alba 1                                                       |
| TGME49_222160 | c.462+6A>G   | splice_region_variant                          | aldehyde dehydrogenase                                       |
| TGME49_222160 | p.Lys58Thr   | missense_variant                               | aldehyde dehydrogenase                                       |
| TGME49_246690 | c.-1282T>C   | 5_prime_UTR_premature_start_codon_gain_variant | alpha amylase, catalytic domain-containing protein           |
| TGME49_246690 | p.Arg59Ser   | missense_variant                               | alpha amylase, catalytic domain-containing protein           |
| TGME49_246690 | p.Leu236Phe  | missense_variant                               | alpha amylase, catalytic domain-containing protein           |
| TGME49_246690 | p.Thr262Ala  | missense_variant                               | alpha amylase, catalytic domain-containing protein           |
| TGME49_246690 | p.Glu277Gly  | missense_variant                               | alpha amylase, catalytic domain-containing protein           |
| TGME49_246690 | p.Gln281His  | missense_variant                               | alpha amylase, catalytic domain-containing protein           |
| TGME49_246690 | c.1213+6T>G  | splice_region_variant                          | alpha amylase, catalytic domain-containing protein           |
| TGME49_246690 | p.Ala883Gly  | missense_variant                               | alpha amylase, catalytic domain-containing protein           |
| TGME49_254880 | p.Glu349Lys  | missense_variant                               | Alpha-galactosidase                                          |
| TGME49_254880 | p.Phe714Leu  | missense_variant                               | Alpha-galactosidase                                          |
| TGME49_214260 | c.-390C>T    | 5_prime_UTR_premature_start_codon_gain_variant | alpha-glucan water dikinase 1, putative                      |
| TGME49_214260 | p.Pro12Ser   | missense_variant                               | alpha-glucan water dikinase 1, putative                      |
| TGME49_214260 | p.Ala746Thr  | missense_variant                               | alpha-glucan water dikinase 1, putative                      |
| TGME49_214260 | c.3002-4G>T  | splice_region_variant                          | alpha-glucan water dikinase 1, putative                      |
| TGME49_319600 | p.Thr644Lys  | missense_variant                               | alpha-tubulin N-acetyltransferase, putative                  |
| TGME49_319600 | p.Ser464Pro  | missense_variant                               | alpha-tubulin N-acetyltransferase, putative                  |
| TGME49_319600 | p.Asp319Asn  | missense_variant                               | alpha-tubulin N-acetyltransferase, putative                  |
| TGME49_319600 | p.Arg284Leu  | missense_variant                               | alpha-tubulin N-acetyltransferase, putative                  |
| TGME49_319600 | p.Glu2Asp    | missense_variant                               | alpha-tubulin N-acetyltransferase, putative                  |
| TGME49_319600 | c.-900C>G    | 5_prime_UTR_premature_start_codon_gain_variant | alpha-tubulin N-acetyltransferase, putative                  |
| TGME49_319600 | c.-1283G>A   | 5_prime_UTR_premature_start_codon_gain_variant | alpha-tubulin N-acetyltransferase, putative                  |
| TGME49_210980 | c.-759G>T    | 5_prime_UTR_premature_start_codon_gain_variant | alternative splicing type 3 and, putative                    |
| TGME49_248700 | p.Glu4Asp    | missense_variant                               | alveolin domain containing intermediate filament IMC12       |
| TGME49_275670 | p.Asn686Ser  | missense_variant                               | alveolin domain containing intermediate filament IMC15       |
| TGME49_275670 | p.Ser622Cys  | missense_variant                               | alveolin domain containing intermediate filament IMC15       |
| TGME49_275670 | p.Ala621Thr  | missense_variant                               | alveolin domain containing intermediate filament IMC15       |
| TGME49_275670 | p.Gln608His  | missense_variant&splice_region_variant         | alveolin domain containing intermediate filament IMC15       |
| TGME49_224530 | p.Val49Leu   | missense_variant                               | alveolin domain containing intermediate filament IMC5        |
| TGME49_224520 | c.-168C>T    | 5_prime_UTR_premature_start_codon_gain_variant | alveolin domain containing intermediate filament IMC8        |
| TGME49_221310 | p.Val86Gly   | missense_variant                               | aminopeptidase N protein                                     |
| TGME49_224460 | c.-350G>A    | 5_prime_UTR_premature_start_codon_gain_variant | aminopeptidase n, putative                                   |
| TGME49_224460 | p.Asn66Asp   | missense_variant                               | aminopeptidase n, putative                                   |
| TGME49_224460 | c.1753-4T>C  | splice_region_variant                          | aminopeptidase n, putative                                   |
| TGME49_224350 | p.Glu623Ala  | missense_variant                               | aminopeptidase N, putative                                   |
| TGME49_224350 | p.Gly141Val  | missense_variant                               | aminopeptidase N, putative                                   |
| TGME49_211090 | p.Pro171Ser  | missense_variant                               | aminotransferase, class V superfamily protein                |
| TGME49_211090 | p.Pro165Ser  | missense_variant                               | aminotransferase, class V superfamily protein                |
| TGME49_211090 | p.Ser104Phe  | missense_variant                               | aminotransferase, class V superfamily protein                |
| TGME49_211090 | p.Ala5Thr    | missense_variant                               | aminotransferase, class V superfamily protein                |
| TGME49_211090 | c.-1215T>G   | 5_prime_UTR_premature_start_codon_gain_variant | aminotransferase, class V superfamily protein                |
| TGME49_300120 | p.Ala84Gly   | missense_variant                               | aminotransferase, class V superfamily protein                |
| TGME49_234280 | p.Gly962Ser  | missense_variant                               | AMP deaminase                                                |
| TGME49_234280 | p.Ala916Ser  | missense_variant                               | AMP deaminase                                                |
| TGME49_236980 | p.Gly834Ser  | missense_variant                               | AMP-binding enzyme domain-containing protein                 |
| TGME49_219230 | p.Thr731Ala  | missense_variant                               | AMP-binding enzyme domain-containing protein                 |
| TGME49_219230 | p.Gln641His  | missense_variant                               | AMP-binding enzyme domain-containing protein                 |
| TGME49_247760 | c.1510-5C>T  | splice_region_variant                          | AMP-binding enzyme domain-containing protein                 |
| TGME49_221910 | c.28-4G>A    | splice_region_variant                          | AN1 family Zinc finger domain-containing protein             |
| TGME49_214500 | p.Val73Met   | missense_variant                               | ankyrin repeat-containing protein                            |
| TGME49_219210 | p.Gly134Ala  | missense_variant                               | ankyrin repeat-containing protein                            |
| TGME49_219210 | p.Ser33Pro   | missense_variant                               | ankyrin repeat-containing protein                            |
| TGME49_219210 | c.-559T>C    | 5_prime_UTR_premature_start_codon_gain_variant | ankyrin repeat-containing protein                            |
| TGME49_219210 | c.-1074G>T   | 5_prime_UTR_premature_start_codon_gain_variant | ankyrin repeat-containing protein                            |
| TGME49_254200 | p.Arg921Lys  | missense_variant                               | anticodon binding domain-containing protein                  |
| TGME49_254200 | p.Thr744Ala  | missense_variant                               | anticodon binding domain-containing protein                  |
| TGME49_254200 | c.1814-5C>T  | splice_region_variant                          | anticodon binding domain-containing protein                  |
| TGME49_254200 | p.Ala413Val  | missense_variant                               | anticodon binding domain-containing protein                  |
| TGME49_254200 | p.Pro290Ser  | missense_variant&splice_region_variant         | anticodon binding domain-containing protein                  |
| TGME49_254200 | p.Ile254Val  | missense_variant                               | anticodon binding domain-containing protein                  |
| TGME49_254200 | c.-399T>C    | 5_prime_UTR_premature_start_codon_gain_variant | anticodon binding domain-containing protein                  |
| TGME49_252370 | p.Gly1813Cys | missense_variant                               | AP2 domain transcription factor AP2III-1                     |

|               |              |                                                |                                          |
|---------------|--------------|------------------------------------------------|------------------------------------------|
| TGME49_252370 | p.Glu1688Asp | missense_variant                               | AP2 domain transcription factor AP2III-1 |
| TGME49_252370 | p.Glu1632Asp | missense_variant                               | AP2 domain transcription factor AP2III-1 |
| TGME49_252370 | p.Ala1507Ser | missense_variant                               | AP2 domain transcription factor AP2III-1 |
| TGME49_252370 | p.Pro1365Ser | missense_variant                               | AP2 domain transcription factor AP2III-1 |
| TGME49_252370 | p.Pro1353Gln | missense_variant                               | AP2 domain transcription factor AP2III-1 |
| TGME49_252370 | p.Val922Ala  | missense_variant                               | AP2 domain transcription factor AP2III-1 |
| TGME49_252370 | p.Gly607Ala  | missense_variant                               | AP2 domain transcription factor AP2III-1 |
| TGME49_252370 | p.Thr207Met  | missense_variant                               | AP2 domain transcription factor AP2III-1 |
| TGME49_252370 | p.Gly122Asp  | missense_variant                               | AP2 domain transcription factor AP2III-1 |
| TGME49_253380 | c.-3324G>T   | 5_prime_UTR_premature_start_codon_gain_variant | AP2 domain transcription factor AP2III-2 |
| TGME49_253380 | c.-2969C>T   | 5_prime_UTR_premature_start_codon_gain_variant | AP2 domain transcription factor AP2III-2 |
| TGME49_253380 | p.Ala90Pro   | missense_variant                               | AP2 domain transcription factor AP2III-2 |
| TGME49_253380 | p.Ala210Thr  | missense_variant                               | AP2 domain transcription factor AP2III-2 |
| TGME49_253380 | p.Ala339Val  | missense_variant                               | AP2 domain transcription factor AP2III-2 |
| TGME49_253380 | p.Asn419Lys  | missense_variant                               | AP2 domain transcription factor AP2III-2 |
| TGME49_253380 | p.Ala459Val  | missense_variant                               | AP2 domain transcription factor AP2III-2 |
| TGME49_253380 | p.Val775Leu  | missense_variant                               | AP2 domain transcription factor AP2III-2 |
| TGME49_253380 | p.Ile1317Val | missense_variant                               | AP2 domain transcription factor AP2III-2 |
| TGME49_253380 | p.Leu1646Ser | missense_variant                               | AP2 domain transcription factor AP2III-2 |
| TGME49_299150 | p.Arg1877Met | missense_variant                               | AP2 domain transcription factor AP2III-3 |
| TGME49_299150 | p.Arg1817Thr | missense_variant                               | AP2 domain transcription factor AP2III-3 |
| TGME49_299150 | p.Lys1768Arg | missense_variant                               | AP2 domain transcription factor AP2III-3 |
| TGME49_299150 | p.Ser1608Asn | missense_variant                               | AP2 domain transcription factor AP2III-3 |
| TGME49_299150 | p.Ala1328Ser | missense_variant                               | AP2 domain transcription factor AP2III-3 |
| TGME49_299150 | p.Tyr1247Asn | missense_variant                               | AP2 domain transcription factor AP2III-3 |
| TGME49_299150 | p.Val1231Phe | missense_variant                               | AP2 domain transcription factor AP2III-3 |
| TGME49_299150 | p.Val1094Ile | missense_variant                               | AP2 domain transcription factor AP2III-3 |
| TGME49_299150 | p.Val1089Ala | missense_variant                               | AP2 domain transcription factor AP2III-3 |
| TGME49_299150 | p.Pro1020Ser | missense_variant                               | AP2 domain transcription factor AP2III-3 |
| TGME49_299150 | p.Thr780Met  | missense_variant                               | AP2 domain transcription factor AP2III-3 |
| TGME49_299150 | p.Met761Ile  | missense_variant                               | AP2 domain transcription factor AP2III-3 |
| TGME49_299150 | p.Arg655Pro  | missense_variant                               | AP2 domain transcription factor AP2III-3 |
| TGME49_299150 | p.Pro493His  | missense_variant                               | AP2 domain transcription factor AP2III-3 |
| TGME49_299150 | p.Val488Ala  | missense_variant                               | AP2 domain transcription factor AP2III-3 |
| TGME49_299150 | p.Leu450Arg  | missense_variant                               | AP2 domain transcription factor AP2III-3 |
| TGME49_299150 | p.Met392Thr  | missense_variant                               | AP2 domain transcription factor AP2III-3 |
| TGME49_299150 | p.Ala306Glu  | missense_variant                               | AP2 domain transcription factor AP2III-3 |
| TGME49_299150 | p.Ala283Thr  | missense_variant                               | AP2 domain transcription factor AP2III-3 |
| TGME49_299150 | p.Ile126Thr  | missense_variant                               | AP2 domain transcription factor AP2III-3 |
| TGME49_299150 | p.Glu111Lys  | missense_variant                               | AP2 domain transcription factor AP2III-3 |
| TGME49_299150 | p.Thr78Pro   | missense_variant                               | AP2 domain transcription factor AP2III-3 |
| TGME49_299150 | p.Cys49Arg   | missense_variant                               | AP2 domain transcription factor AP2III-3 |
| TGME49_299150 | p.Ser41Pro   | missense_variant                               | AP2 domain transcription factor AP2III-3 |
| TGME49_299020 | p.Gln885Pro  | missense_variant                               | AP2 domain transcription factor AP2III-4 |
| TGME49_299020 | p.Leu746Val  | missense_variant                               | AP2 domain transcription factor AP2III-4 |
| TGME49_318610 | p.Thr697Ser  | missense_variant                               | AP2 domain transcription factor AP2IV-3  |
| TGME49_318610 | p.Met888Val  | missense_variant                               | AP2 domain transcription factor AP2IV-3  |
| TGME49_318470 | p.Thr520Ser  | missense_variant                               | AP2 domain transcription factor AP2IV-4  |
| TGME49_318470 | p.Met570Ile  | missense_variant                               | AP2 domain transcription factor AP2IV-4  |
| TGME49_318470 | p.Pro1816Thr | missense_variant                               | AP2 domain transcription factor AP2IV-4  |
| TGME49_318470 | p.Phe1873Leu | missense_variant                               | AP2 domain transcription factor AP2IV-4  |
| TGME49_318470 | p.Met1882Thr | missense_variant                               | AP2 domain transcription factor AP2IV-4  |
| TGME49_318470 | p.Leu1923Arg | missense_variant                               | AP2 domain transcription factor AP2IV-4  |
| TGME49_318470 | p.Ala1925Gly | missense_variant                               | AP2 domain transcription factor AP2IV-4  |
| TGME49_318470 | p.Lys1936Thr | missense_variant                               | AP2 domain transcription factor AP2IV-4  |
| TGME49_318470 | p.Gly1941Asp | missense_variant                               | AP2 domain transcription factor AP2IV-4  |
| TGME49_318470 | p.Thr2130Pro | missense_variant                               | AP2 domain transcription factor AP2IV-4  |
| TGME49_318470 | p.Asp2398Glu | missense_variant                               | AP2 domain transcription factor AP2IV-4  |
| TGME49_211720 | p.Arg1814Cys | missense_variant                               | AP2 domain transcription factor AP2IV-5  |
| TGME49_211720 | p.Leu1588Ser | missense_variant                               | AP2 domain transcription factor AP2IV-5  |
| TGME49_211720 | p.Val1361Leu | missense_variant                               | AP2 domain transcription factor AP2IV-5  |
| TGME49_211720 | c.-271C>T    | 5_prime_UTR_premature_start_codon_gain_variant | AP2 domain transcription factor AP2IV-5  |
| TGME49_211720 | c.-1993T>G   | 5_prime_UTR_premature_start_codon_gain_variant | AP2 domain transcription factor AP2IV-5  |
| TGME49_215340 | p.Ser87Tyr   | missense_variant                               | AP2 domain transcription factor AP2X-10  |
| TGME49_215570 | p.Glu1178Asp | missense_variant                               | AP2 domain transcription factor AP2X-11  |
| TGME49_215570 | p.Asn1073Thr | missense_variant                               | AP2 domain transcription factor AP2X-11  |
| TGME49_215570 | p.Glu987Asp  | missense_variant                               | AP2 domain transcription factor AP2X-11  |
| TGME49_215570 | p.Asn962Thr  | missense_variant                               | AP2 domain transcription factor AP2X-11  |
| TGME49_215570 | p.Ala225Val  | missense_variant                               | AP2 domain transcription factor AP2X-11  |
| TGME49_215570 | p.Gly87Ser   | missense_variant                               | AP2 domain transcription factor AP2X-11  |
| TGME49_215570 | p.Gln71His   | missense_variant                               | AP2 domain transcription factor AP2X-11  |
| TGME49_224230 | p.Ser426Ala  | missense_variant                               | AP2 domain transcription factor AP2X-3   |
| TGME49_224230 | c.3352-6G>A  | splice_region_variant                          | AP2 domain transcription factor AP2X-3   |
| TGME49_224230 | p.Gly1639Val | missense_variant                               | AP2 domain transcription factor AP2X-3   |
| TGME49_237090 | p.Met211Val  | missense_variant                               | AP2 domain transcription factor AP2X-5   |
| TGME49_237090 | p.Ala943Thr  | missense_variant                               | AP2 domain transcription factor AP2X-5   |
| TGME49_237090 | p.Gly1871Trp | missense_variant                               | AP2 domain transcription factor AP2X-5   |
| TGME49_237425 | p.Gly853Val  | missense_variant                               | AP2 domain transcription factor AP2X-6   |
| TGME49_237425 | p.Thr855Pro  | missense_variant                               | AP2 domain transcription factor AP2X-6   |
| TGME49_237425 | p.Ser988Ile  | missense_variant                               | AP2 domain transcription factor AP2X-6   |
| TGME49_237425 | p.Phe1066Val | missense_variant                               | AP2 domain transcription factor AP2X-6   |
| TGME49_237425 | p.Met1109Thr | missense_variant                               | AP2 domain transcription factor AP2X-6   |
| TGME49_237425 | p.Arg1303Ile | missense_variant                               | AP2 domain transcription factor AP2X-6   |
| TGME49_237425 | p.Pro1724Ser | missense_variant                               | AP2 domain transcription factor AP2X-6   |
| TGME49_237425 | p.Ser1997Thr | missense_variant                               | AP2 domain transcription factor AP2X-6   |

|               |              |                                                |                                                               |
|---------------|--------------|------------------------------------------------|---------------------------------------------------------------|
| TGME49_237425 | p.Gln2085Glu | missense_variant                               | AP2 domain transcription factor AP2X-6                        |
| TGME49_237425 | p.Ala2272Val | missense_variant                               | AP2 domain transcription factor AP2X-6                        |
| TGME49_237425 | p.Thr2382Ala | missense_variant                               | AP2 domain transcription factor AP2X-6                        |
| TGME49_237425 | p.Met4244Leu | missense_variant                               | AP2 domain transcription factor AP2X-6                        |
| TGME49_214840 | c.-4282G>T   | 5_prime_UTR_premature_start_codon_gain_variant | AP2 domain transcription factor AP2X-7                        |
| TGME49_214960 | p.Asp282Glu  | missense_variant                               | AP2 domain transcription factor AP2X-8                        |
| TGME49_214960 | p.Ala799Thr  | missense_variant                               | AP2 domain transcription factor AP2X-8                        |
| TGME49_214960 | p.Gly1580Val | missense_variant                               | AP2 domain transcription factor AP2X-8                        |
| TGME49_214960 | p.Ile1594Thr | missense_variant                               | AP2 domain transcription factor AP2X-8                        |
| TGME49_214960 | p.Val1725Ala | missense_variant                               | AP2 domain transcription factor AP2X-8                        |
| TGME49_214960 | p.Ala1752Thr | missense_variant                               | AP2 domain transcription factor AP2X-8                        |
| TGME49_214960 | p.Ala2369Thr | missense_variant                               | AP2 domain transcription factor AP2X-8                        |
| TGME49_214960 | p.Thr2484Ala | missense_variant                               | AP2 domain transcription factor AP2X-8                        |
| TGME49_214960 | p.Thr2841Ala | missense_variant                               | AP2 domain transcription factor AP2X-8                        |
| TGME49_214960 | p.Ala2849Pro | missense_variant                               | AP2 domain transcription factor AP2X-8                        |
| TGME49_215150 | p.Ala349Thr  | missense_variant                               | AP2 domain transcription factor AP2X-9                        |
| TGME49_215150 | p.Ser148Asn  | missense_variant                               | AP2 domain transcription factor AP2X-9                        |
| TGME49_215150 | c.-1208A>G   | 5_prime_UTR_premature_start_codon_gain_variant | AP2 domain transcription factor AP2X-9                        |
| TGME49_218960 | p.Ser2017Pro | missense_variant                               | AP2 domain transcription factor AP2XII-1                      |
| TGME49_218960 | p.Leu213Ile  | missense_variant                               | AP2 domain transcription factor AP2XII-1                      |
| TGME49_218960 | p.Gly72Ser   | missense_variant                               | AP2 domain transcription factor AP2XII-1                      |
| TGME49_218960 | p.Ala28Val   | missense_variant                               | AP2 domain transcription factor AP2XII-1                      |
| TGME49_217700 | p.Pro15Leu   | missense_variant                               | AP2 domain transcription factor AP2XII-2                      |
| TGME49_217700 | p.Ala181Thr  | missense_variant                               | AP2 domain transcription factor AP2XII-2                      |
| TGME49_217700 | p.Ala364Ser  | missense_variant                               | AP2 domain transcription factor AP2XII-2                      |
| TGME49_217700 | p.Ala579Thr  | missense_variant                               | AP2 domain transcription factor AP2XII-2                      |
| TGME49_217700 | p.Glu1071Ala | missense_variant                               | AP2 domain transcription factor AP2XII-2                      |
| TGME49_217700 | p.Leu1184Ile | missense_variant                               | AP2 domain transcription factor AP2XII-2                      |
| TGME49_246660 | c.-406T>G    | 5_prime_UTR_premature_start_codon_gain_variant | AP2 domain transcription factor AP2XII-3                      |
| TGME49_247700 | p.Ser3776Ala | missense_variant                               | AP2 domain transcription factor AP2XII-4                      |
| TGME49_247700 | p.Ala3767Pro | missense_variant                               | AP2 domain transcription factor AP2XII-4                      |
| TGME49_247700 | p.Ala3744Gly | missense_variant                               | AP2 domain transcription factor AP2XII-4                      |
| TGME49_247700 | p.Gly2877Ser | missense_variant                               | AP2 domain transcription factor AP2XII-4                      |
| TGME49_247700 | p.Leu2450Val | missense_variant                               | AP2 domain transcription factor AP2XII-4                      |
| TGME49_247700 | p.Gln2342Pro | missense_variant                               | AP2 domain transcription factor AP2XII-4                      |
| TGME49_247700 | p.Ser2271Gly | missense_variant                               | AP2 domain transcription factor AP2XII-4                      |
| TGME49_247700 | p.Glu1615Asp | missense_variant                               | AP2 domain transcription factor AP2XII-4                      |
| TGME49_247700 | p.Gly1062Ala | missense_variant                               | AP2 domain transcription factor AP2XII-4                      |
| TGME49_247700 | p.Pro597Leu  | missense_variant                               | AP2 domain transcription factor AP2XII-4                      |
| TGME49_247700 | p.Gly159Cys  | missense_variant                               | AP2 domain transcription factor AP2XII-4                      |
| TGME49_247730 | p.Ala150Gly  | missense_variant                               | AP2 domain transcription factor AP2XII-5                      |
| TGME49_247730 | p.Val92Leu   | missense_variant                               | AP2 domain transcription factor AP2XII-5                      |
| TGME49_249190 | p.Asn278Asp  | missense_variant                               | AP2 domain transcription factor AP2XII-6                      |
| TGME49_249190 | p.Ser221Arg  | missense_variant                               | AP2 domain transcription factor AP2XII-6                      |
| TGME49_249190 | c.-262C>T    | 5_prime_UTR_premature_start_codon_gain_variant | AP2 domain transcription factor AP2XII-6                      |
| TGME49_251740 | p.Ala1602Thr | missense_variant                               | AP2 domain transcription factor AP2XII-9                      |
| TGME49_251740 | p.Thr1169Pro | missense_variant                               | AP2 domain transcription factor AP2XII-9                      |
| TGME49_251740 | p.Ser1052Thr | missense_variant                               | AP2 domain transcription factor AP2XII-9                      |
| TGME49_251740 | p.His926Gln  | missense_variant                               | AP2 domain transcription factor AP2XII-9                      |
| TGME49_251740 | p.Ala636Val  | missense_variant                               | AP2 domain transcription factor AP2XII-9                      |
| TGME49_251740 | p.Pro628Ala  | missense_variant                               | AP2 domain transcription factor AP2XII-9                      |
| TGME49_251740 | p.Ala626Thr  | missense_variant                               | AP2 domain transcription factor AP2XII-9                      |
| TGME49_251740 | p.Pro601Arg  | missense_variant                               | AP2 domain transcription factor AP2XII-9                      |
| TGME49_249650 | p.Asp62Asn   | missense_variant                               | apolipoprotein A-I binding protein, putative                  |
| TGME49_249650 | p.Leu77Arg   | missense_variant                               | apolipoprotein A-I binding protein, putative                  |
| TGME49_249650 | p.Pro79Leu   | missense_variant                               | apolipoprotein A-I binding protein, putative                  |
| TGME49_249650 | p.Pro87Ala   | missense_variant                               | apolipoprotein A-I binding protein, putative                  |
| TGME49_249650 | p.Cys88Phe   | missense_variant                               | apolipoprotein A-I binding protein, putative                  |
| TGME49_299990 | p.Lys241Arg  | missense_variant                               | archease family protein                                       |
| TGME49_299990 | p.Ser76Pro   | missense_variant                               | archease family protein                                       |
| TGME49_299990 | c.-463A>G    | 5_prime_UTR_premature_start_codon_gain_variant | archease family protein                                       |
| TGME49_299990 | c.-663C>T    | 5_prime_UTR_premature_start_codon_gain_variant | archease family protein                                       |
| TGME49_280700 | c.-616T>G    | 5_prime_UTR_premature_start_codon_gain_variant | arginine decarboxylase                                        |
| TGME49_210840 | p.Val282Ile  | missense_variant                               | arginyl-tRNA synthetase family protein                        |
| TGME49_210840 | c.543+8A>C   | splice_region_variant                          | arginyl-tRNA synthetase family protein                        |
| TGME49_235980 | c.-400C>G    | 5_prime_UTR_premature_start_codon_gain_variant | ARIADNE family protein                                        |
| TGME49_235980 | c.-329C>G    | 5_prime_UTR_premature_start_codon_gain_variant | ARIADNE family protein                                        |
| TGME49_235980 | c.-251C>G    | 5_prime_UTR_premature_start_codon_gain_variant | ARIADNE family protein                                        |
| TGME49_235980 | c.-174T>G    | 5_prime_UTR_premature_start_codon_gain_variant | ARIADNE family protein                                        |
| TGME49_235980 | c.214-3C>T   | splice_region_variant                          | ARIADNE family protein                                        |
| TGME49_246170 | p.Ser974Gly  | missense_variant                               | ARID/BRIGHT DNA binding domain-containing protein             |
| TGME49_246170 | p.Gly1340Glu | missense_variant                               | ARID/BRIGHT DNA binding domain-containing protein             |
| TGME49_246170 | p.Gly1425Val | missense_variant                               | ARID/BRIGHT DNA binding domain-containing protein             |
| TGME49_237600 | c.-245T>G    | 5_prime_UTR_premature_start_codon_gain_variant | Armadillo/beta-catenin family repeat-containing protein       |
| TGME49_307990 | p.Leu192Met  | missense_variant                               | arrestin (or s-antigen), n-terminal domain-containing protein |
| TGME49_307990 | p.Met71Val   | missense_variant                               | arrestin (or s-antigen), n-terminal domain-containing protein |
| TGME49_307990 | p.Ser54Arg   | missense_variant                               | arrestin (or s-antigen), n-terminal domain-containing protein |
| TGME49_248600 | p.Leu5Arg    | missense_variant                               | aspartate aminotransferase                                    |
| TGME49_278750 | c.-37T>G     | 5_prime_UTR_premature_start_codon_gain_variant | AT hook motif domain-containing protein                       |
| TGME49_278750 | p.Pro155Leu  | missense_variant                               | AT hook motif domain-containing protein                       |
| TGME49_215090 | c.448-4T>G   | splice_region_variant                          | ATP binding protein, putative                                 |
| TGME49_249820 | c.3855-6C>G  | splice_region_variant                          | ATP-binding cassette sub-family B member 5                    |
| TGME49_249820 | p.Arg1167His | missense_variant                               | ATP-binding cassette sub-family B member 5                    |
| TGME49_249820 | p.Thr148Ala  | missense_variant                               | ATP-binding cassette sub-family B member 5                    |
| TGME49_318710 | c.655+6G>T   | splice_region_variant                          | ATP-binding cassette sub-family F member 1                    |

|               |              |                                                |                                                                                     |
|---------------|--------------|------------------------------------------------|-------------------------------------------------------------------------------------|
| TGME49_223840 | p.Pro165Leu  | missense_variant                               | ATP-citrate lyase, putative                                                         |
| TGME49_318320 | c.-407G>T    | 5_prime_UTR_premature_start_codon_gain_variant | ATP-dependent Clp endopeptidase, proteolytic subunit ClpP domain-containing protein |
| TGME49_318320 | p.Ser46Pro   | missense_variant                               | ATP-dependent Clp endopeptidase, proteolytic subunit ClpP domain-containing protein |
| TGME49_318320 | p.Lys126Arg  | missense_variant                               | ATP-dependent Clp endopeptidase, proteolytic subunit ClpP domain-containing protein |
| TGME49_318320 | p.Ser140Trp  | missense_variant                               | ATP-dependent Clp endopeptidase, proteolytic subunit ClpP domain-containing protein |
| TGME49_318320 | p.Arg302Ser  | missense_variant                               | ATP-dependent Clp endopeptidase, proteolytic subunit ClpP domain-containing protein |
| TGME49_318320 | c.1160-4T>G  | splice_region_variant                          | ATP-dependent Clp endopeptidase, proteolytic subunit ClpP domain-containing protein |
| TGME49_210730 | c.1657-4C>T  | splice_region_variant                          | ATP-dependent hsl protease ATP-binding subunit hslU, putative                       |
| TGME49_300020 | p.Ala102Thr  | missense_variant                               | ATP-dependent metalloproteinase HflB subfamily protein                              |
| TGME49_300020 | c.1879-8T>G  | splice_region_variant                          | ATP-dependent metalloproteinase HflB subfamily protein                              |
| TGME49_218610 | p.His796Asp  | missense_variant                               | ATPase (DUF699) protein                                                             |
| TGME49_252250 | p.Pro1124Thr | missense_variant&splice_region_variant         | ATPase, AAA family protein                                                          |
| TGME49_252250 | p.Arg637Trp  | missense_variant                               | ATPase, AAA family protein                                                          |
| TGME49_252250 | p.Thr180Ala  | missense_variant                               | ATPase, AAA family protein                                                          |
| TGME49_299168 | c.1106+8C>A  | splice_region_variant                          | ATPase, AAA family protein                                                          |
| TGME49_299168 | p.Phe298Leu  | missense_variant                               | ATPase, AAA family protein                                                          |
| TGME49_299168 | p.Ala59Thr   | missense_variant                               | ATPase, AAA family protein                                                          |
| TGME49_299168 | p.Met41Ile   | missense_variant                               | ATPase, AAA family protein                                                          |
| TGME49_299168 | p.Leu6Pro    | missense_variant                               | ATPase, AAA family protein                                                          |
| TGME49_211050 | p.Gln334Arg  | missense_variant                               | ATPase, AAA family protein                                                          |
| TGME49_235170 | c.-811C>T    | 5_prime_UTR_premature_start_codon_gain_variant | ATPase, AAA family protein                                                          |
| TGME49_235170 | p.Arg142Pro  | missense_variant                               | ATPase, AAA family protein                                                          |
| TGME49_235170 | p.Ala461Pro  | missense_variant                               | ATPase, AAA family protein                                                          |
| TGME49_235610 | p.Val1204Gly | missense_variant                               | ATPase, AAA family protein                                                          |
| TGME49_235610 | p.Ser274Leu  | missense_variant                               | ATPase, AAA family protein                                                          |
| TGME49_247390 | p.Asp299His  | missense_variant                               | ATPase, AAA family protein                                                          |
| TGME49_247390 | p.Glu652Ala  | missense_variant                               | ATPase, AAA family protein                                                          |
| TGME49_247390 | c.4367-8T>G  | splice_region_variant                          | ATPase, AAA family protein                                                          |
| TGME49_247390 | p.Glu1677Asp | missense_variant                               | ATPase, AAA family protein                                                          |
| TGME49_247390 | p.Arg1683Leu | missense_variant                               | ATPase, AAA family protein                                                          |
| TGME49_247390 | p.Glu1684Asp | missense_variant                               | ATPase, AAA family protein                                                          |
| TGME49_247390 | p.Ala1861Thr | missense_variant                               | ATPase, AAA family protein                                                          |
| TGME49_247390 | p.Leu2456Val | missense_variant                               | ATPase, AAA family protein                                                          |
| TGME49_247390 | p.Arg2524Ser | missense_variant                               | ATPase, AAA family protein                                                          |
| TGME49_247390 | p.Arg2524His | missense_variant                               | ATPase, AAA family protein                                                          |
| TGME49_247390 | p.Gly2767Glu | missense_variant                               | ATPase, AAA family protein                                                          |
| TGME49_247390 | p.Asp2775Glu | missense_variant                               | ATPase, AAA family protein                                                          |
| TGME49_247390 | p.Thr2838Ala | missense_variant                               | ATPase, AAA family protein                                                          |
| TGME49_247390 | p.Ser2944Pro | missense_variant                               | ATPase, AAA family protein                                                          |
| TGME49_247390 | p.Glu2987Gly | missense_variant                               | ATPase, AAA family protein                                                          |
| TGME49_247390 | p.Ser3092Asn | missense_variant                               | ATPase, AAA family protein                                                          |
| TGME49_247390 | p.Arg3131Leu | missense_variant                               | ATPase, AAA family protein                                                          |
| TGME49_247390 | p.Asp3175Gly | missense_variant                               | ATPase, AAA family protein                                                          |
| TGME49_247390 | p.Ala3473Thr | missense_variant                               | ATPase, AAA family protein                                                          |
| TGME49_297780 | c.-1217C>G   | 5_prime_UTR_premature_start_codon_gain_variant | ATPase/histidine kinase/DNA gyrase B/HSP90 domain-containing protein                |
| TGME49_297780 | p.Pro183Leu  | missense_variant                               | ATPase/histidine kinase/DNA gyrase B/HSP90 domain-containing protein                |
| TGME49_297780 | p.Pro190Leu  | missense_variant                               | ATPase/histidine kinase/DNA gyrase B/HSP90 domain-containing protein                |
| TGME49_318770 | p.Leu1394Val | missense_variant                               | aurora kinase(incomplete catalytic triad)                                           |
| TGME49_318770 | p.Pro1043Thr | missense_variant                               | aurora kinase(incomplete catalytic triad)                                           |
| TGME49_318770 | p.Asn475Ser  | missense_variant                               | aurora kinase(incomplete catalytic triad)                                           |
| TGME49_318770 | p.Pro327Ala  | missense_variant                               | aurora kinase(incomplete catalytic triad)                                           |
| TGME49_318770 | p.Pro295Leu  | missense_variant                               | aurora kinase(incomplete catalytic triad)                                           |
| TGME49_318770 | p.Asp286Asn  | missense_variant                               | aurora kinase(incomplete catalytic triad)                                           |
| TGME49_318770 | p.Gln224Arg  | missense_variant                               | aurora kinase(incomplete catalytic triad)                                           |
| TGME49_318770 | p.Gln221Glu  | missense_variant                               | aurora kinase(incomplete catalytic triad)                                           |
| TGME49_318770 | p.Thr215Arg  | missense_variant                               | aurora kinase(incomplete catalytic triad)                                           |
| TGME49_318770 | p.Phe20Ser   | missense_variant                               | aurora kinase(incomplete catalytic triad)                                           |
| TGME49_299190 | p.Glu42Gln   | missense_variant                               | B-box zinc finger domain-containing protein                                         |
| TGME49_299190 | p.Ser279Ala  | missense_variant                               | B-box zinc finger domain-containing protein                                         |
| TGME49_299190 | p.Val499Ile  | missense_variant                               | B-box zinc finger domain-containing protein                                         |
| TGME49_299190 | p.Leu682Ile  | missense_variant                               | B-box zinc finger domain-containing protein                                         |
| TGME49_299190 | p.Leu682His  | missense_variant                               | B-box zinc finger domain-containing protein                                         |
| TGME49_299190 | p.Asp714Asn  | missense_variant                               | B-box zinc finger domain-containing protein                                         |
| TGME49_299190 | p.Asp738Asn  | missense_variant                               | B-box zinc finger domain-containing protein                                         |
| TGME49_288390 | p.Leu253Val  | missense_variant                               | B3GNTL1 protein                                                                     |
| TGME49_239930 | c.-84C>T     | 5_prime_UTR_premature_start_codon_gain_variant | beta-catenin family protein 1, putative                                             |
| TGME49_239930 | c.-269C>G    | 5_prime_UTR_premature_start_codon_gain_variant | beta-catenin family protein 1, putative                                             |
| TGME49_236990 | p.Leu1614Ile | missense_variant                               | beta-ketoacyl synthase, N-terminal domain-containing protein                        |
| TGME49_297420 | p.Ile2016Leu | missense_variant                               | beta-tubulin cofactor D, putative                                                   |
| TGME49_297420 | p.Val1913Gly | missense_variant                               | beta-tubulin cofactor D, putative                                                   |
| TGME49_297420 | p.Ala1503Val | missense_variant                               | beta-tubulin cofactor D, putative                                                   |
| TGME49_297420 | p.Asn994Asp  | missense_variant                               | beta-tubulin cofactor D, putative                                                   |
| TGME49_297420 | p.Ala666Thr  | missense_variant                               | beta-tubulin cofactor D, putative                                                   |
| TGME49_297420 | p.Glu650Lys  | missense_variant                               | beta-tubulin cofactor D, putative                                                   |
| TGME49_297420 | p.Glu391Asp  | missense_variant                               | beta-tubulin cofactor D, putative                                                   |
| TGME49_297420 | p.Lys345Glu  | missense_variant                               | beta-tubulin cofactor D, putative                                                   |
| TGME49_297420 | p.Cys284Trp  | missense_variant                               | beta-tubulin cofactor D, putative                                                   |
| TGME49_297420 | p.Thr167Ser  | missense_variant                               | beta-tubulin cofactor D, putative                                                   |
| TGME49_297420 | c.-1213T>G   | 5_prime_UTR_premature_start_codon_gain_variant | beta-tubulin cofactor D, putative                                                   |
| TGME49_297420 | c.-2395A>T   | 5_prime_UTR_premature_start_codon_gain_variant | beta-tubulin cofactor D, putative                                                   |
| TGME49_249180 | p.Glu591Asp  | missense_variant                               | bifunctional dihydrofolate reductase-thymidylate synthase                           |
| TGME49_239320 | c.729-7T>C   | splice_region_variant                          | BoIA family protein                                                                 |
| TGME49_235880 | p.Gly31Ala   | missense_variant                               | brain protein 44 family protein                                                     |
| TGME49_239790 | c.-200C>T    | 5_prime_UTR_premature_start_codon_gain_variant | BRCA1 C Terminus (BRCT) domain-containing protein                                   |
| TGME49_239790 | c.1552+8G>T  | splice_region_variant                          | BRCA1 C Terminus (BRCT) domain-containing protein                                   |



|               |              |                                                |                                                   |
|---------------|--------------|------------------------------------------------|---------------------------------------------------|
| TGME49_237480 | p.Arg1802Gly | missense_variant                               | BRCA1 C Terminus (BRCT) domain-containing protein |
| TGME49_237480 | p.Arg1744His | missense_variant                               | BRCA1 C Terminus (BRCT) domain-containing protein |
| TGME49_237480 | p.Pro1715Leu | missense_variant                               | BRCA1 C Terminus (BRCT) domain-containing protein |
| TGME49_237480 | p.Ser1627Cys | missense_variant                               | BRCA1 C Terminus (BRCT) domain-containing protein |
| TGME49_237480 | p.Tyr1181Cys | missense_variant                               | BRCA1 C Terminus (BRCT) domain-containing protein |
| TGME49_237480 | p.Thr406Ile  | missense_variant                               | BRCA1 C Terminus (BRCT) domain-containing protein |
| TGME49_237480 | p.Pro132Ser  | missense_variant                               | BRCA1 C Terminus (BRCT) domain-containing protein |
| TGME49_237480 | p.Ala128Val  | missense_variant                               | BRCA1 C Terminus (BRCT) domain-containing protein |
| TGME49_237480 | p.Met101Val  | missense_variant                               | BRCA1 C Terminus (BRCT) domain-containing protein |
| TGME49_237480 | p.Val68Ala   | missense_variant                               | BRCA1 C Terminus (BRCT) domain-containing protein |
| TGME49_237480 | p.Val68Leu   | missense_variant                               | BRCA1 C Terminus (BRCT) domain-containing protein |
| TGME49_222000 | p.Thr412Ile  | missense_variant                               | brix domain-containing protein                    |
| TGME49_222000 | p.Lys196Glu  | missense_variant                               | brix domain-containing protein                    |
| TGME49_214240 | p.Ala311Glu  | missense_variant                               | bromodomain-containing protein                    |
| TGME49_214240 | p.Phe1129Val | missense_variant                               | bromodomain-containing protein                    |
| TGME49_214240 | p.Ala2472Glu | missense_variant                               | bromodomain-containing protein                    |
| TGME49_236020 | p.Thr586Ala  | missense_variant                               | BT1 family protein                                |
| TGME49_238240 | c.-377A>T    | 5_prime_UTR_premature_start_codon_gain_variant | bystin protein                                    |
| TGME49_254750 | p.Thr291Ile  | missense_variant                               | c3orf115 protein                                  |
| TGME49_251570 | p.Leu1206Phe | missense_variant                               | CAAX amino terminal protease family protein       |
| TGME49_251570 | p.Leu1027Ile | missense_variant                               | CAAX amino terminal protease family protein       |
| TGME49_251570 | p.Pro511Leu  | missense_variant                               | CAAX amino terminal protease family protein       |
| TGME49_300340 | p.Ala146Val  | missense_variant                               | CAF1 family ribonuclease                          |
| TGME49_318540 | p.Ala101Val  | missense_variant                               | calcium binding egf domain-containing protein     |
| TGME49_318540 | p.Ser46Cys   | missense_variant                               | calcium binding egf domain-containing protein     |
| TGME49_254190 | c.-1556C>T   | 5_prime_UTR_premature_start_codon_gain_variant | calcium signaling protein kinase MARK, putative   |
| TGME49_254190 | c.-1306G>C   | 5_prime_UTR_premature_start_codon_gain_variant | calcium signaling protein kinase MARK, putative   |
| TGME49_254190 | c.-568C>T    | 5_prime_UTR_premature_start_codon_gain_variant | calcium signaling protein kinase MARK, putative   |
| TGME49_254190 | c.-94T>G     | 5_prime_UTR_premature_start_codon_gain_variant | calcium signaling protein kinase MARK, putative   |
| TGME49_301440 | c.-2483G>T   | 5_prime_UTR_premature_start_codon_gain_variant | calcium-dependent protein kinase CDPK1            |
| TGME49_301440 | c.1018+8G>T  | splice_region_variant                          | calcium-dependent protein kinase CDPK1            |
| TGME49_237890 | c.-521G>T    | 5_prime_UTR_premature_start_codon_gain_variant | calcium-dependent protein kinase CDPK4            |
| TGME49_237890 | p.Ala227Val  | missense_variant                               | calcium-dependent protein kinase CDPK4            |
| TGME49_237890 | p.Ala337Ser  | missense_variant                               | calcium-dependent protein kinase CDPK4            |
| TGME49_237890 | p.Ile399Asn  | missense_variant                               | calcium-dependent protein kinase CDPK4            |
| TGME49_218720 | p.Leu89Arg   | missense_variant                               | calcium-dependent protein kinase CDPK6            |
| TGME49_218720 | p.Lys308Arg  | missense_variant                               | calcium-dependent protein kinase CDPK6            |
| TGME49_218720 | p.Val358Ala  | missense_variant                               | calcium-dependent protein kinase CDPK6            |
| TGME49_218720 | p.Asn620Thr  | missense_variant                               | calcium-dependent protein kinase CDPK6            |
| TGME49_218720 | p.Cys688Ser  | missense_variant                               | calcium-dependent protein kinase CDPK6            |
| TGME49_218720 | p.Ala829Thr  | missense_variant                               | calcium-dependent protein kinase CDPK6            |
| TGME49_246930 | p.Ala137Thr  | missense_variant                               | calmodulin CAM1                                   |
| TGME49_253940 | p.Glu551Asp  | missense_variant                               | CAM Kinase family, incomplete catalytic triad     |
| TGME49_253940 | p.Ala539Val  | missense_variant                               | CAM Kinase family, incomplete catalytic triad     |
| TGME49_253940 | p.Val515Leu  | missense_variant                               | CAM Kinase family, incomplete catalytic triad     |
| TGME49_253940 | p.Phe468Leu  | missense_variant                               | CAM Kinase family, incomplete catalytic triad     |
| TGME49_253940 | c.-1568C>T   | 5_prime_UTR_premature_start_codon_gain_variant | CAM Kinase family, incomplete catalytic triad     |
| TGME49_253940 | c.-1924C>G   | 5_prime_UTR_premature_start_codon_gain_variant | CAM Kinase family, incomplete catalytic triad     |
| TGME49_253940 | c.-2057C>G   | 5_prime_UTR_premature_start_codon_gain_variant | CAM Kinase family, incomplete catalytic triad     |
| TGME49_253940 | c.-2125C>G   | 5_prime_UTR_premature_start_codon_gain_variant | CAM Kinase family, incomplete catalytic triad     |
| TGME49_253940 | c.-2721G>T   | 5_prime_UTR_premature_start_codon_gain_variant | CAM Kinase family, incomplete catalytic triad     |
| TGME49_253940 | c.-2738C>A   | 5_prime_UTR_premature_start_codon_gain_variant | CAM Kinase family, incomplete catalytic triad     |
| TGME49_253940 | c.-3378C>G   | 5_prime_UTR_premature_start_codon_gain_variant | CAM Kinase family, incomplete catalytic triad     |
| TGME49_215670 | p.Arg1519Thr | missense_variant                               | cAMP-dependent protein kinase                     |
| TGME49_215670 | p.Ile1449Thr | missense_variant                               | cAMP-dependent protein kinase                     |
| TGME49_215670 | p.Glu1441Gly | missense_variant                               | cAMP-dependent protein kinase                     |
| TGME49_215670 | p.Pro1175Leu | missense_variant                               | cAMP-dependent protein kinase                     |
| TGME49_215670 | p.Gly900Asp  | missense_variant                               | cAMP-dependent protein kinase                     |
| TGME49_215670 | p.Ser826Phe  | missense_variant                               | cAMP-dependent protein kinase                     |
| TGME49_215670 | p.Glu423Gly  | missense_variant                               | cAMP-dependent protein kinase                     |
| TGME49_215670 | p.Thr372Ser  | missense_variant                               | cAMP-dependent protein kinase                     |
| TGME49_215260 | c.4122-7C>T  | splice_region_variant                          | carbamoylphosphate synthetase                     |
| TGME49_215260 | c.3398-6C>T  | splice_region_variant                          | carbamoylphosphate synthetase                     |
| TGME49_215260 | p.Ser1074*   | stop_gained                                    | carbamoylphosphate synthetase                     |
| TGME49_215260 | c.2401+5C>A  | splice_region_variant                          | carbamoylphosphate synthetase                     |
| TGME49_215260 | c.1705-4T>C  | splice_region_variant                          | carbamoylphosphate synthetase                     |
| TGME49_215260 | c.1705-5T>C  | splice_region_variant                          | carbamoylphosphate synthetase                     |
| TGME49_215260 | c.1138+4A>G  | splice_region_variant                          | carbamoylphosphate synthetase                     |
| TGME49_215260 | p.Asn208Lys  | missense_variant                               | carbamoylphosphate synthetase                     |
| TGME49_215260 | p.Arg19Gln   | missense_variant                               | carbamoylphosphate synthetase                     |
| TGME49_239080 | p.Pro207Leu  | missense_variant                               | carrier superfamily protein                       |
| TGME49_239080 | p.Asn427Ser  | missense_variant                               | carrier superfamily protein                       |
| TGME49_239080 | p.Gly489Glu  | missense_variant                               | carrier superfamily protein                       |
| TGME49_239080 | p.Pro530Leu  | missense_variant                               | carrier superfamily protein                       |
| TGME49_218770 | p.Arg448Gly  | missense_variant                               | carrier superfamily protein                       |
| TGME49_218770 | p.Ser418Leu  | missense_variant                               | carrier superfamily protein                       |
| TGME49_218770 | p.Ala254Thr  | missense_variant                               | carrier superfamily protein                       |
| TGME49_218770 | p.Ala186Val  | missense_variant                               | carrier superfamily protein                       |
| TGME49_218770 | p.Ser125Pro  | missense_variant                               | carrier superfamily protein                       |
| TGME49_218770 | p.Ser98Cys   | missense_variant                               | carrier superfamily protein                       |
| TGME49_218770 | p.Gly4Glu    | missense_variant                               | carrier superfamily protein                       |
| TGME49_248950 | p.Ala200Pro  | missense_variant                               | carrier superfamily protein                       |
| TGME49_247710 | c.-1003T>G   | 5_prime_UTR_premature_start_codon_gain_variant | casein kinase I                                   |
| TGME49_247710 | c.-846T>G    | 5_prime_UTR_premature_start_codon_gain_variant | casein kinase I                                   |
| TGME49_247710 | p.Leu446Val  | missense_variant                               | casein kinase I                                   |

|               |              |                                                |                                                               |
|---------------|--------------|------------------------------------------------|---------------------------------------------------------------|
| TGME49_249670 | p.Glu271Lys  | missense_variant                               | cathepsin B                                                   |
| TGME49_249670 | p.Glu94Gln   | missense_variant                               | cathepsin B                                                   |
| TGME49_224190 | c.-156C>G    | 5_prime_UTR_premature_start_codon_gain_variant | cation-transporting atpase family protein                     |
| TGME49_224190 | c.-703C>T    | 5_prime_UTR_premature_start_codon_gain_variant | cation-transporting atpase family protein                     |
| TGME49_219260 | c.-833A>G    | 5_prime_UTR_premature_start_codon_gain_variant | cation-transporting ATPase, putative                          |
| TGME49_219260 | p.Pro216Leu  | missense_variant                               | cation-transporting ATPase, putative                          |
| TGME49_219260 | p.Ala852Thr  | missense_variant                               | cation-transporting ATPase, putative                          |
| TGME49_219260 | p.Ser1529Ala | missense_variant                               | cation-transporting ATPase, putative                          |
| TGME49_219260 | p.Lys1696Glu | missense_variant                               | cation-transporting ATPase, putative                          |
| TGME49_219260 | p.Ala2709Ser | missense_variant                               | cation-transporting ATPase, putative                          |
| TGME49_219260 | p.Trp2710Cys | missense_variant                               | cation-transporting ATPase, putative                          |
| TGME49_219260 | p.Gly2733Arg | missense_variant                               | cation-transporting ATPase, putative                          |
| TGME49_219260 | p.Gln2786Arg | missense_variant                               | cation-transporting ATPase, putative                          |
| TGME49_219260 | p.Arg2790Gln | missense_variant                               | cation-transporting ATPase, putative                          |
| TGME49_219260 | p.Pro2849Leu | missense_variant                               | cation-transporting ATPase, putative                          |
| TGME49_319658 | c.-81C>T     | 5_prime_UTR_premature_start_codon_gain_variant | CBF/Mak21 family protein                                      |
| TGME49_319658 | p.Ala199Pro  | missense_variant                               | CBF/Mak21 family protein                                      |
| TGME49_319658 | p.Gly216Val  | missense_variant                               | CBF/Mak21 family protein                                      |
| TGME49_319658 | p.Pro409Ala  | missense_variant                               | CBF/Mak21 family protein                                      |
| TGME49_319658 | p.Ser532Thr  | missense_variant                               | CBF/Mak21 family protein                                      |
| TGME49_319658 | p.Ala535Val  | missense_variant                               | CBF/Mak21 family protein                                      |
| TGME49_211350 | c.-1617C>G   | 5_prime_UTR_premature_start_codon_gain_variant | CBS domain-containing protein                                 |
| TGME49_211350 | p.Lys490Arg  | missense_variant                               | CBS domain-containing protein                                 |
| TGME49_211350 | p.Ser790Ala  | missense_variant                               | CBS domain-containing protein                                 |
| TGME49_211350 | p.Pro793Ser  | missense_variant                               | CBS domain-containing protein                                 |
| TGME49_211350 | p.Asp840Glu  | missense_variant                               | CBS domain-containing protein                                 |
| TGME49_211350 | p.Arg973Leu  | missense_variant                               | CBS domain-containing protein                                 |
| TGME49_211350 | p.Ser1168Thr | missense_variant                               | CBS domain-containing protein                                 |
| TGME49_254540 | p.Phe962Ile  | missense_variant                               | CDP-alcohol phosphatidyltransferase superfamily protein       |
| TGME49_254540 | p.Asn923Ser  | missense_variant                               | CDP-alcohol phosphatidyltransferase superfamily protein       |
| TGME49_254540 | p.Ser910Phe  | missense_variant                               | CDP-alcohol phosphatidyltransferase superfamily protein       |
| TGME49_254540 | p.His495Asp  | missense_variant                               | CDP-alcohol phosphatidyltransferase superfamily protein       |
| TGME49_254540 | p.Ala298Pro  | missense_variant                               | CDP-alcohol phosphatidyltransferase superfamily protein       |
| TGME49_254540 | p.Ser248Thr  | missense_variant                               | CDP-alcohol phosphatidyltransferase superfamily protein       |
| TGME49_254540 | p.Lys235Asn  | missense_variant                               | CDP-alcohol phosphatidyltransferase superfamily protein       |
| TGME49_254540 | p.Leu49Phe   | missense_variant                               | CDP-alcohol phosphatidyltransferase superfamily protein       |
| TGME49_221490 | c.-349C>T    | 5_prime_UTR_premature_start_codon_gain_variant | cell cycle regulator protein                                  |
| TGME49_249260 | c.*1147C>A   | splice_region_variant                          | cell-cycle-associated protein kinase CDK, putative            |
| TGME49_249260 | p.Gln1312His | missense_variant                               | cell-cycle-associated protein kinase CDK, putative            |
| TGME49_249260 | p.Asn1187Ser | missense_variant                               | cell-cycle-associated protein kinase CDK, putative            |
| TGME49_249260 | p.Leu286Ile  | missense_variant                               | cell-cycle-associated protein kinase CDK, putative            |
| TGME49_249260 | p.Val125Ile  | missense_variant                               | cell-cycle-associated protein kinase CDK, putative            |
| TGME49_249260 | p.Pro38Thr   | missense_variant                               | cell-cycle-associated protein kinase CDK, putative            |
| TGME49_224480 | c.4441-6C>T  | splice_region_variant                          | cell-cycle-associated protein kinase CLK, putative            |
| TGME49_224480 | p.Leu1158Phe | missense_variant                               | cell-cycle-associated protein kinase CLK, putative            |
| TGME49_224480 | p.Ser787Ala  | missense_variant                               | cell-cycle-associated protein kinase CLK, putative            |
| TGME49_224480 | p.Arg456His  | missense_variant                               | cell-cycle-associated protein kinase CLK, putative            |
| TGME49_224480 | p.Arg311His  | missense_variant                               | cell-cycle-associated protein kinase CLK, putative            |
| TGME49_224480 | p.Pro73Leu   | missense_variant                               | cell-cycle-associated protein kinase CLK, putative            |
| TGME49_224480 | p.Pro73Ala   | missense_variant                               | cell-cycle-associated protein kinase CLK, putative            |
| TGME49_224480 | c.-1475G>T   | 5_prime_UTR_premature_start_codon_gain_variant | cell-cycle-associated protein kinase CLK, putative            |
| TGME49_253440 | c.2502-6G>A  | splice_region_variant                          | cell-cycle-associated protein kinase SRPK, putative           |
| TGME49_253440 | c.2634+4G>T  | splice_region_variant                          | cell-cycle-associated protein kinase SRPK, putative           |
| TGME49_253440 | c.2634+5G>T  | splice_region_variant                          | cell-cycle-associated protein kinase SRPK, putative           |
| TGME49_253440 | p.Ser1312Asn | missense_variant                               | cell-cycle-associated protein kinase SRPK, putative           |
| TGME49_253440 | p.Leu1506Ile | missense_variant                               | cell-cycle-associated protein kinase SRPK, putative           |
| TGME49_320430 | p.His251Arg  | missense_variant                               | cell-cycle-control protein (translation regulation), putative |
| TGME49_320430 | p.Gly304Glu  | missense_variant                               | cell-cycle-control protein (translation regulation), putative |
| TGME49_320430 | p.Pro337His  | missense_variant                               | cell-cycle-control protein (translation regulation), putative |
| TGME49_320430 | c.2021+8A>G  | splice_region_variant                          | cell-cycle-control protein (translation regulation), putative |
| TGME49_250340 | c.286-6T>C   | splice_region_variant                          | centrin 2                                                     |
| TGME49_250340 | c.-357C>G    | 5_prime_UTR_premature_start_codon_gain_variant | centrin 2                                                     |
| TGME49_250340 | c.-652A>G    | 5_prime_UTR_premature_start_codon_gain_variant | centrin 2                                                     |
| TGME49_237490 | c.-326T>C    | 5_prime_UTR_premature_start_codon_gain_variant | centrin family protein                                        |
| TGME49_221420 | p.Pro904Ser  | missense_variant                               | Chromosome-associated kinesin KLP1, putative                  |
| TGME49_218210 | p.Lys625Arg  | missense_variant                               | Chromosome-associated kinesin KLP1, putative                  |
| TGME49_221260 | p.Ser15Thr   | missense_variant                               | Class-II DAHP synthetase family protein                       |
| TGME49_221260 | p.Cys92Gly   | missense_variant                               | Class-II DAHP synthetase family protein                       |
| TGME49_221260 | c.1134+8C>T  | splice_region_variant                          | Class-II DAHP synthetase family protein                       |
| TGME49_275690 | c.-383C>A    | 5_prime_UTR_premature_start_codon_gain_variant | CipB, putative                                                |
| TGME49_253580 | p.Cys771Arg  | missense_variant                               | CMGC kinase, CDK family                                       |
| TGME49_253580 | p.Ala1208Thr | missense_variant                               | CMGC kinase, CDK family                                       |
| TGME49_253580 | p.His1213Gln | missense_variant                               | CMGC kinase, CDK family                                       |
| TGME49_250850 | p.Met2454Val | missense_variant                               | CMGC kinase, putative                                         |
| TGME49_250850 | p.Ser2353Gly | missense_variant                               | CMGC kinase, putative                                         |
| TGME49_250850 | p.Ser2352Leu | missense_variant                               | CMGC kinase, putative                                         |
| TGME49_250850 | p.Cys1952Arg | missense_variant                               | CMGC kinase, putative                                         |
| TGME49_250850 | p.Arg1712Pro | missense_variant                               | CMGC kinase, putative                                         |
| TGME49_250850 | p.Ser516Thr  | missense_variant                               | CMGC kinase, putative                                         |
| TGME49_235020 | p.Glu1122Asp | missense_variant                               | COP1 protein, putative                                        |
| TGME49_235402 | p.Pro190Ala  | missense_variant                               | CorA family Mg2+ transporter protein                          |
| TGME49_235402 | c.1060-6T>C  | splice_region_variant                          | CorA family Mg2+ transporter protein                          |
| TGME49_235402 | p.Leu648Phe  | missense_variant                               | CorA family Mg2+ transporter protein                          |
| TGME49_235402 | p.Pro1178Leu | missense_variant                               | CorA family Mg2+ transporter protein                          |
| TGME49_254260 | c.-93T>C     | 5_prime_UTR_premature_start_codon_gain_variant | COX19 cytochrome c oxidase assembly family protein            |

|               |              |                                                |                                                                                                |
|---------------|--------------|------------------------------------------------|------------------------------------------------------------------------------------------------|
| TGME49_224280 | p.Pro1944Ser | missense_variant                               | CPSF A subunit region protein                                                                  |
| TGME49_224280 | p.His1937Pro | missense_variant                               | CPSF A subunit region protein                                                                  |
| TGME49_224280 | p.Tyr1936Cys | missense_variant                               | CPSF A subunit region protein                                                                  |
| TGME49_224280 | p.Gly1933Ser | missense_variant                               | CPSF A subunit region protein                                                                  |
| TGME49_224280 | p.Ser1780Asn | missense_variant                               | CPSF A subunit region protein                                                                  |
| TGME49_224280 | p.Gly1592Asp | missense_variant                               | CPSF A subunit region protein                                                                  |
| TGME49_224280 | p.Glu1584Lys | missense_variant                               | CPSF A subunit region protein                                                                  |
| TGME49_224280 | p.Ile856Val  | missense_variant                               | CPSF A subunit region protein                                                                  |
| TGME49_224280 | p.Leu537Arg  | missense_variant                               | CPSF A subunit region protein                                                                  |
| TGME49_224280 | p.Leu450Met  | missense_variant                               | CPSF A subunit region protein                                                                  |
| TGME49_224280 | p.Arg322Cys  | missense_variant                               | CPSF A subunit region protein                                                                  |
| TGME49_318500 | c.914-6A>T   | splice_region_variant                          | cpw-wpc domain-containing protein                                                              |
| TGME49_318500 | p.Pro106Ser  | missense_variant                               | cpw-wpc domain-containing protein                                                              |
| TGME49_247310 | p.Thr179Ala  | missense_variant                               | cpw-wpc domain-containing protein                                                              |
| TGME49_254390 | p.His436Arg  | missense_variant                               | CRAL/TRIO domain-containing protein                                                            |
| TGME49_254390 | c.-2973C>T   | 5_prime_UTR_premature_start_codon_gain_variant | CRAL/TRIO domain-containing protein                                                            |
| TGME49_246330 | p.Ala70Thr   | missense_variant                               | CRAL/TRIO domain-containing protein                                                            |
| TGME49_246330 | p.Thr63Ser   | missense_variant                               | CRAL/TRIO domain-containing protein                                                            |
| TGME49_221350 | c.-636C>G    | 5_prime_UTR_premature_start_codon_gain_variant | Ctr copper transporter family protein                                                          |
| TGME49_221350 | p.Leu30Met   | missense_variant                               | Ctr copper transporter family protein                                                          |
| TGME49_221350 | p.Asp129Ala  | missense_variant                               | Ctr copper transporter family protein                                                          |
| TGME49_221350 | p.Pro173Ser  | missense_variant                               | Ctr copper transporter family protein                                                          |
| TGME49_221200 | p.Gly2613Glu | missense_variant                               | CW-type Zinc Finger protein                                                                    |
| TGME49_221200 | p.Val2214Ile | missense_variant                               | CW-type Zinc Finger protein                                                                    |
| TGME49_221200 | p.Val2127Gly | missense_variant                               | CW-type Zinc Finger protein                                                                    |
| TGME49_221200 | p.Ala2070Thr | missense_variant                               | CW-type Zinc Finger protein                                                                    |
| TGME49_221200 | p.Thr756Ala  | missense_variant                               | CW-type Zinc Finger protein                                                                    |
| TGME49_221200 | p.Glu506Asp  | missense_variant                               | CW-type Zinc Finger protein                                                                    |
| TGME49_235350 | p.Leu531Ile  | missense_variant                               | cwjf family protein                                                                            |
| TGME49_219070 | p.Ser2654Asn | missense_variant                               | cyclic nucleotide-binding domain-containing protein                                            |
| TGME49_219070 | c.6760+4C>A  | splice_region_variant                          | cyclic nucleotide-binding domain-containing protein                                            |
| TGME49_219070 | p.Asn1731Ser | missense_variant                               | cyclic nucleotide-binding domain-containing protein                                            |
| TGME49_219070 | p.Thr957Ala  | missense_variant                               | cyclic nucleotide-binding domain-containing protein                                            |
| TGME49_219070 | p.Glu933Lys  | missense_variant                               | cyclic nucleotide-binding domain-containing protein                                            |
| TGME49_219070 | p.Asn932His  | missense_variant                               | cyclic nucleotide-binding domain-containing protein                                            |
| TGME49_219070 | p.Met6Val    | missense_variant                               | cyclic nucleotide-binding domain-containing protein                                            |
| TGME49_239910 | c.-3109T>G   | 5_prime_UTR_premature_start_codon_gain_variant | cyclin-dependent kinase                                                                        |
| TGME49_239910 | c.-1282T>C   | 5_prime_UTR_premature_start_codon_gain_variant | cyclin-dependent kinase                                                                        |
| TGME49_239910 | p.Gln824His  | missense_variant                               | cyclin-dependent kinase                                                                        |
| TGME49_239910 | p.Gln999Glu  | missense_variant                               | cyclin-dependent kinase                                                                        |
| TGME49_239910 | p.Val1103Leu | missense_variant                               | cyclin-dependent kinase                                                                        |
| TGME49_239910 | p.Ser1122Gly | missense_variant                               | cyclin-dependent kinase                                                                        |
| TGME49_239910 | p.Pro1815Leu | missense_variant                               | cyclin-dependent kinase                                                                        |
| TGME49_239910 | p.Val1974Ala | missense_variant                               | cyclin-dependent kinase                                                                        |
| TGME49_239910 | p.Gln2287His | missense_variant                               | cyclin-dependent kinase                                                                        |
| TGME49_219832 | p.Glu1005Gly | missense_variant                               | cyclin-dependent kinase regulatory subunit protein                                             |
| TGME49_219100 | p.Ser182Asn  | missense_variant                               | cyclin-dependent kinase regulatory subunit protein                                             |
| TGME49_300350 | c.953-3C>T   | splice_region_variant                          | cysteine desulfurase/selenocysteine lyase family PLP dependent transferase superfamily protein |
| TGME49_299810 | p.Thr898Pro  | missense_variant                               | cysteine-tRNA synthetase (CysRS)                                                               |
| TGME49_299810 | p.Lys772Arg  | missense_variant                               | cysteine-tRNA synthetase (CysRS)                                                               |
| TGME49_239630 | c.-304T>C    | 5_prime_UTR_premature_start_codon_gain_variant | cytidine and deoxycytidylate deaminase zinc-binding region domain-containing protein           |
| TGME49_239630 | c.-89T>C     | 5_prime_UTR_premature_start_codon_gain_variant | cytidine and deoxycytidylate deaminase zinc-binding region domain-containing protein           |
| TGME49_239630 | p.Leu211His  | missense_variant                               | cytidine and deoxycytidylate deaminase zinc-binding region domain-containing protein           |
| TGME49_239630 | p.Gly235Ala  | missense_variant                               | cytidine and deoxycytidylate deaminase zinc-binding region domain-containing protein           |
| TGME49_215750 | p.Pro470Ser  | missense_variant                               | cytidine and deoxycytidylate deaminase zinc-binding region domain-containing protein           |
| TGME49_277510 | c.863+4G>A   | splice_region_variant                          | cytoplasmic dynein intermediate chain                                                          |
| TGME49_277510 | c.-75C>T     | 5_prime_UTR_premature_start_codon_gain_variant | cytoplasmic dynein intermediate chain                                                          |
| TGME49_277510 | c.-722C>T    | 5_prime_UTR_premature_start_codon_gain_variant | cytoplasmic dynein intermediate chain                                                          |
| TGME49_277510 | c.-1053T>C   | 5_prime_UTR_premature_start_codon_gain_variant | cytoplasmic dynein intermediate chain                                                          |
| TGME49_277510 | c.-2373T>A   | 5_prime_UTR_premature_start_codon_gain_variant | cytoplasmic dynein intermediate chain                                                          |
| TGME49_280730 | c.716-7G>A   | splice_region_variant                          | cytosolic fe-s cluster assembling factor nbp35, putative                                       |
| TGME49_219540 | p.Ala1265Val | missense_variant                               | cytosolic tRNA-Ala synthetase                                                                  |
| TGME49_219540 | c.3576+8G>A  | splice_region_variant                          | cytosolic tRNA-Ala synthetase                                                                  |
| TGME49_219540 | p.Leu1142Val | missense_variant&splice_region_variant         | cytosolic tRNA-Ala synthetase                                                                  |
| TGME49_219540 | c.3267+8A>T  | splice_region_variant                          | cytosolic tRNA-Ala synthetase                                                                  |
| TGME49_219540 | c.3267+6A>G  | splice_region_variant                          | cytosolic tRNA-Ala synthetase                                                                  |
| TGME49_219540 | p.Arg878Lys  | missense_variant                               | cytosolic tRNA-Ala synthetase                                                                  |
| TGME49_219540 | p.Val772Leu  | missense_variant                               | cytosolic tRNA-Ala synthetase                                                                  |
| TGME49_219540 | p.Pro224Leu  | missense_variant                               | cytosolic tRNA-Ala synthetase                                                                  |
| TGME49_219540 | p.Leu186Phe  | missense_variant                               | cytosolic tRNA-Ala synthetase                                                                  |
| TGME49_219540 | p.Phe151Ser  | missense_variant                               | cytosolic tRNA-Ala synthetase                                                                  |
| TGME49_219540 | p.Ser94Ala   | missense_variant                               | cytosolic tRNA-Ala synthetase                                                                  |
| TGME49_239820 | c.-700C>T    | 5_prime_UTR_premature_start_codon_gain_variant | D-3-phosphoglycerate dehydrogenase                                                             |
| TGME49_236650 | c.-201C>T    | 5_prime_UTR_premature_start_codon_gain_variant | DEAD (Asp-Glu-Ala-Asp) box polypeptide 17                                                      |
| TGME49_236650 | c.-1887C>G   | 5_prime_UTR_premature_start_codon_gain_variant | DEAD (Asp-Glu-Ala-Asp) box polypeptide 17                                                      |
| TGME49_294350 | p.Arg2258Leu | missense_variant                               | DEAD/DEAH box helicase domain-containing protein                                               |
| TGME49_221660 | c.-185C>G    | 5_prime_UTR_premature_start_codon_gain_variant | DEAD/DEAH box helicase domain-containing protein                                               |
| TGME49_221660 | p.Ser366Thr  | missense_variant                               | DEAD/DEAH box helicase domain-containing protein                                               |
| TGME49_221660 | p.Pro774Ser  | missense_variant                               | DEAD/DEAH box helicase domain-containing protein                                               |
| TGME49_222140 | p.Arg885Lys  | missense_variant                               | DEAD/DEAH box helicase domain-containing protein                                               |
| TGME49_222140 | p.Ala363Thr  | missense_variant                               | DEAD/DEAH box helicase domain-containing protein                                               |
| TGME49_222140 | p.Glu341Lys  | missense_variant                               | DEAD/DEAH box helicase domain-containing protein                                               |
| TGME49_222140 | p.Pro134His  | missense_variant                               | DEAD/DEAH box helicase domain-containing protein                                               |
| TGME49_222140 | p.Pro44Leu   | missense_variant                               | DEAD/DEAH box helicase domain-containing protein                                               |

|               |              |                                                |                                                  |
|---------------|--------------|------------------------------------------------|--------------------------------------------------|
| TGME49_222140 | p.His10Asn   | missense_variant                               | DEAD/DEAH box helicase domain-containing protein |
| TGME49_253090 | c.-3075C>T   | 5_prime_UTR_premature_start_codon_gain_variant | DEAD/DEAH box helicase domain-containing protein |
| TGME49_253090 | c.-3044T>C   | 5_prime_UTR_premature_start_codon_gain_variant | DEAD/DEAH box helicase domain-containing protein |
| TGME49_253090 | p.Ala213Pro  | missense_variant                               | DEAD/DEAH box helicase domain-containing protein |
| TGME49_253090 | p.Phe260Leu  | missense_variant                               | DEAD/DEAH box helicase domain-containing protein |
| TGME49_253090 | p.Arg269Ile  | missense_variant                               | DEAD/DEAH box helicase domain-containing protein |
| TGME49_253090 | p.Pro287Leu  | missense_variant                               | DEAD/DEAH box helicase domain-containing protein |
| TGME49_253090 | p.Leu443His  | missense_variant                               | DEAD/DEAH box helicase domain-containing protein |
| TGME49_253090 | p.Ser526Ala  | missense_variant                               | DEAD/DEAH box helicase domain-containing protein |
| TGME49_211400 | p.Lys812Glu  | missense_variant                               | DEAD/DEAH box helicase domain-containing protein |
| TGME49_211400 | p.Gly784Arg  | missense_variant                               | DEAD/DEAH box helicase domain-containing protein |
| TGME49_211400 | p.Lys770Asn  | missense_variant                               | DEAD/DEAH box helicase domain-containing protein |
| TGME49_211400 | c.2081-6G>A  | splice_region_variant                          | DEAD/DEAH box helicase domain-containing protein |
| TGME49_211400 | c.2080+6C>A  | splice_region_variant                          | DEAD/DEAH box helicase domain-containing protein |
| TGME49_211400 | p.Ser590Asn  | missense_variant                               | DEAD/DEAH box helicase domain-containing protein |
| TGME49_211400 | p.Ala526Pro  | missense_variant                               | DEAD/DEAH box helicase domain-containing protein |
| TGME49_211400 | p.Thr460Pro  | missense_variant                               | DEAD/DEAH box helicase domain-containing protein |
| TGME49_211400 | p.Asp175Val  | missense_variant                               | DEAD/DEAH box helicase domain-containing protein |
| TGME49_223440 | p.Cys1429Arg | missense_variant                               | DEAD/DEAH box helicase domain-containing protein |
| TGME49_223440 | p.Ala1251Thr | missense_variant                               | DEAD/DEAH box helicase domain-containing protein |
| TGME49_223440 | p.Ala1243Gly | missense_variant                               | DEAD/DEAH box helicase domain-containing protein |
| TGME49_223440 | p.Glu1236Asp | missense_variant                               | DEAD/DEAH box helicase domain-containing protein |
| TGME49_223440 | p.His682Pro  | missense_variant                               | DEAD/DEAH box helicase domain-containing protein |
| TGME49_223440 | p.Gly528Ser  | missense_variant                               | DEAD/DEAH box helicase domain-containing protein |
| TGME49_223440 | p.Glu513Lys  | missense_variant                               | DEAD/DEAH box helicase domain-containing protein |
| TGME49_223440 | p.Ser217Cys  | missense_variant                               | DEAD/DEAH box helicase domain-containing protein |
| TGME49_223440 | p.Leu214Phe  | missense_variant                               | DEAD/DEAH box helicase domain-containing protein |
| TGME49_223440 | p.Pro151Thr  | missense_variant                               | DEAD/DEAH box helicase domain-containing protein |
| TGME49_223440 | p.Pro38His   | missense_variant                               | DEAD/DEAH box helicase domain-containing protein |
| TGME49_223440 | c.-153T>C    | 5_prime_UTR_premature_start_codon_gain_variant | DEAD/DEAH box helicase domain-containing protein |
| TGME49_251480 | p.Gly1051Ala | missense_variant                               | DEAD/DEAH box helicase domain-containing protein |
| TGME49_251480 | p.Ser1046Ala | missense_variant                               | DEAD/DEAH box helicase domain-containing protein |
| TGME49_251480 | p.Ser459Ala  | missense_variant                               | DEAD/DEAH box helicase domain-containing protein |
| TGME49_251480 | p.Ala186Asp  | missense_variant                               | DEAD/DEAH box helicase domain-containing protein |
| TGME49_251480 | c.-348C>G    | 5_prime_UTR_premature_start_codon_gain_variant | DEAD/DEAH box helicase domain-containing protein |
| TGME49_219200 | c.-392G>T    | 5_prime_UTR_premature_start_codon_gain_variant | DEAD/DEAH box RNA helicase family protein        |
| TGME49_219200 | c.712-4G>T   | splice_region_variant                          | DEAD/DEAH box RNA helicase family protein        |
| TGME49_219200 | p.Ser818Gly  | missense_variant                               | DEAD/DEAH box RNA helicase family protein        |
| TGME49_212410 | p.Arg4Cys    | missense_variant                               | dense granule protein GRA11                      |
| TGME49_212410 | p.Thr99Ser   | missense_variant                               | dense granule protein GRA11                      |
| TGME49_212410 | p.Thr106Ala  | missense_variant                               | dense granule protein GRA11                      |
| TGME49_212410 | p.Arg108Lys  | missense_variant                               | dense granule protein GRA11                      |
| TGME49_237800 | p.Gln70His   | missense_variant                               | dense granule protein GRA11                      |
| TGME49_237800 | p.Asn74Ser   | missense_variant                               | dense granule protein GRA11                      |
| TGME49_237800 | p.Val101Met  | missense_variant                               | dense granule protein GRA11                      |
| TGME49_237800 | p.Val101Ala  | missense_variant                               | dense granule protein GRA11                      |
| TGME49_237800 | p.Ala182Thr  | missense_variant                               | dense granule protein GRA11                      |
| TGME49_237800 | p.Leu386Phe  | missense_variant                               | dense granule protein GRA11                      |
| TGME49_237800 | p.Pro389Ala  | missense_variant                               | dense granule protein GRA11                      |
| TGME49_275440 | p.Val49Phe   | missense_variant                               | dense granule protein GRA6                       |
| TGME49_275440 | c.-777A>T    | 5_prime_UTR_premature_start_codon_gain_variant | dense granule protein GRA6                       |
| TGME49_254720 | p.Ser33Gly   | missense_variant                               | dense granule protein GRA8                       |
| TGME49_254720 | p.Asn44Ile   | missense_variant                               | dense granule protein GRA8                       |
| TGME49_254720 | p.Pro93Leu   | missense_variant                               | dense granule protein GRA8                       |
| TGME49_254720 | p.Gln116His  | missense_variant                               | dense granule protein GRA8                       |
| TGME49_254720 | p.Phe255Leu  | missense_variant                               | dense granule protein GRA8                       |
| TGME49_222170 | p.Ala44Val   | missense_variant                               | dense-granule antigen DG32                       |
| TGME49_318750 | p.Asn212Lys  | missense_variant                               | deoxyribose-phosphate aldolase                   |
| TGME49_294290 | p.Pro15Ser   | missense_variant                               | Der1ER1                                          |
| TGME49_301370 | p.Gly265Glu  | missense_variant                               | DHHC zinc finger domain-containing protein       |
| TGME49_301370 | p.Ile203Phe  | missense_variant                               | DHHC zinc finger domain-containing protein       |
| TGME49_224310 | c.-822T>C    | 5_prime_UTR_premature_start_codon_gain_variant | DHHC zinc finger domain-containing protein       |
| TGME49_224310 | p.Pro52Leu   | missense_variant                               | DHHC zinc finger domain-containing protein       |
| TGME49_224310 | p.Leu55Val   | missense_variant                               | DHHC zinc finger domain-containing protein       |
| TGME49_224310 | p.Ser236Arg  | missense_variant                               | DHHC zinc finger domain-containing protein       |
| TGME49_224310 | p.Ser345Cys  | missense_variant                               | DHHC zinc finger domain-containing protein       |
| TGME49_224290 | c.290+8G>A   | splice_region_variant                          | DHHC zinc finger domain-containing protein       |
| TGME49_246650 | p.Arg374Ser  | missense_variant                               | DHHC zinc finger domain-containing protein       |
| TGME49_249380 | p.Ser43Ala   | missense_variant                               | DHHC zinc finger domain-containing protein       |
| TGME49_250870 | p.Leu321Phe  | missense_variant                               | DHHC zinc finger domain-containing protein       |
| TGME49_278850 | c.-1281A>G   | 5_prime_UTR_premature_start_codon_gain_variant | DHHC zinc finger domain-containing protein       |
| TGME49_275600 | p.Ser49Asn   | missense_variant                               | diacylglycerol acyltransferase                   |
| TGME49_239250 | p.Thr1708Met | missense_variant                               | diacylglycerol kinase, putative                  |
| TGME49_239250 | p.Met1698Ile | missense_variant                               | diacylglycerol kinase, putative                  |
| TGME49_239250 | p.Pro1667Leu | missense_variant                               | diacylglycerol kinase, putative                  |
| TGME49_239250 | p.Ile1429Met | missense_variant                               | diacylglycerol kinase, putative                  |
| TGME49_239250 | p.Leu1315Pro | missense_variant                               | diacylglycerol kinase, putative                  |
| TGME49_239250 | c.3271+4A>G  | splice_region_variant                          | diacylglycerol kinase, putative                  |
| TGME49_239250 | p.Val454Ile  | missense_variant                               | diacylglycerol kinase, putative                  |
| TGME49_239250 | p.Ala11Thr   | missense_variant                               | diacylglycerol kinase, putative                  |
| TGME49_239250 | c.-577T>C    | 5_prime_UTR_premature_start_codon_gain_variant | diacylglycerol kinase, putative                  |
| TGME49_239250 | c.-1365C>T   | 5_prime_UTR_premature_start_codon_gain_variant | diacylglycerol kinase, putative                  |
| TGME49_278740 | c.-396T>C    | 5_prime_UTR_premature_start_codon_gain_variant | diaminopimelate decarboxylase                    |
| TGME49_278740 | c.-1066A>G   | 5_prime_UTR_premature_start_codon_gain_variant | diaminopimelate decarboxylase                    |
| TGME49_278740 | c.-1080C>T   | 5_prime_UTR_premature_start_codon_gain_variant | diaminopimelate decarboxylase                    |

|               |              |                                                |                                                                                          |
|---------------|--------------|------------------------------------------------|------------------------------------------------------------------------------------------|
| TGME49_219550 | p.Ala184Thr  | missense_variant                               | dihydropolypyllysine-residue succinyltransferase component of oxoglutarate dehydrogenase |
| TGME49_219550 | p.Lys41Glu   | missense_variant                               | dihydropolypyllysine-residue succinyltransferase component of oxoglutarate dehydrogenase |
| TGME49_219550 | c.-72C>G     | 5_prime_UTR_premature_start_codon_gain_variant | dihydropolypyllysine-residue succinyltransferase component of oxoglutarate dehydrogenase |
| TGME49_210790 | p.Ser20Cys   | missense_variant                               | dihydroorotate dehydrogenase reveal, putative                                            |
| TGME49_280780 | p.Ala196Ser  | missense_variant                               | dihydrouridine synthase (dus) protein                                                    |
| TGME49_280780 | p.Gly540Asp  | missense_variant                               | dihydrouridine synthase (dus) protein                                                    |
| TGME49_300320 | p.Glu429Lys  | missense_variant                               | dimethyladenosine transferase                                                            |
| TGME49_245500 | p.Thr306Ala  | missense_variant                               | dipeptidyl peptidase iv (dpp iv) n-terminal region domain-containing protein             |
| TGME49_245500 | p.Thr140Ala  | missense_variant                               | dipeptidyl peptidase iv (dpp iv) n-terminal region domain-containing protein             |
| TGME49_224910 | c.-371G>A    | 5_prime_UTR_premature_start_codon_gain_variant | divalent cation tolerance protein, CutA1 family protein                                  |
| TGME49_224910 | c.498+7G>C   | splice_region_variant                          | divalent cation tolerance protein, CutA1 family protein                                  |
| TGME49_221330 | p.Thr1146Met | missense_variant                               | DNA gyrase/topoisomerase IV, A subunit domain-containing protein                         |
| TGME49_221330 | p.Ser1042Pro | missense_variant                               | DNA gyrase/topoisomerase IV, A subunit domain-containing protein                         |
| TGME49_221330 | p.Asp1021Gly | missense_variant                               | DNA gyrase/topoisomerase IV, A subunit domain-containing protein                         |
| TGME49_221330 | p.Lys893Gln  | missense_variant                               | DNA gyrase/topoisomerase IV, A subunit domain-containing protein                         |
| TGME49_221330 | p.Ala543Thr  | missense_variant                               | DNA gyrase/topoisomerase IV, A subunit domain-containing protein                         |
| TGME49_221330 | p.Arg263His  | missense_variant                               | DNA gyrase/topoisomerase IV, A subunit domain-containing protein                         |
| TGME49_221330 | p.Gly247Ala  | missense_variant                               | DNA gyrase/topoisomerase IV, A subunit domain-containing protein                         |
| TGME49_221330 | p.Ala206Val  | missense_variant                               | DNA gyrase/topoisomerase IV, A subunit domain-containing protein                         |
| TGME49_221330 | p.Leu194Pro  | missense_variant                               | DNA gyrase/topoisomerase IV, A subunit domain-containing protein                         |
| TGME49_236200 | p.Glu1485Gly | missense_variant                               | DNA mismatch repair protein, C-terminal domain-containing protein                        |
| TGME49_236200 | p.Glu1304Lys | missense_variant                               | DNA mismatch repair protein, C-terminal domain-containing protein                        |
| TGME49_236200 | p.Ala1219Glu | missense_variant                               | DNA mismatch repair protein, C-terminal domain-containing protein                        |
| TGME49_236200 | p.Asp1110Gly | missense_variant                               | DNA mismatch repair protein, C-terminal domain-containing protein                        |
| TGME49_236200 | p.Val1105Gly | missense_variant                               | DNA mismatch repair protein, C-terminal domain-containing protein                        |
| TGME49_236200 | p.Ser919Arg  | missense_variant                               | DNA mismatch repair protein, C-terminal domain-containing protein                        |
| TGME49_236200 | p.Leu696Met  | missense_variant                               | DNA mismatch repair protein, C-terminal domain-containing protein                        |
| TGME49_236200 | p.Ser154Pro  | missense_variant                               | DNA mismatch repair protein, C-terminal domain-containing protein                        |
| TGME49_217910 | p.Ser200Gly  | missense_variant                               | DNA polymerase (pol2) superfamily protein                                                |
| TGME49_280690 | p.Arg531Lys  | missense_variant                               | DNA polymerase epsilon subunit B protein                                                 |
| TGME49_319860 | p.Ala2972Ser | missense_variant                               | DNA polymerase family B protein                                                          |
| TGME49_319860 | p.Pro2295Thr | missense_variant                               | DNA polymerase family B protein                                                          |
| TGME49_319860 | p.Gly2190Asp | missense_variant                               | DNA polymerase family B protein                                                          |
| TGME49_319860 | c.5325+6G>A  | splice_region_variant                          | DNA polymerase family B protein                                                          |
| TGME49_319860 | p.Lys1604Arg | missense_variant                               | DNA polymerase family B protein                                                          |
| TGME49_319860 | p.Asp822Asn  | missense_variant                               | DNA polymerase family B protein                                                          |
| TGME49_237830 | p.Arg364Lys  | missense_variant                               | DNA polymerase I domain-containing protein                                               |
| TGME49_237830 | p.Ser1176Thr | missense_variant                               | DNA polymerase I domain-containing protein                                               |
| TGME49_237830 | p.Gly1355Cys | missense_variant                               | DNA polymerase I domain-containing protein                                               |
| TGME49_237830 | c.4407+7G>A  | splice_region_variant                          | DNA polymerase I domain-containing protein                                               |
| TGME49_297840 | c.620-6T>G   | splice_region_variant                          | DNA primase, large subunit                                                               |
| TGME49_297840 | p.Thr119Ala  | missense_variant                               | DNA primase, large subunit                                                               |
| TGME49_297840 | p.Met112Thr  | missense_variant                               | DNA primase, large subunit                                                               |
| TGME49_297840 | c.-333C>G    | 5_prime_UTR_premature_start_codon_gain_variant | DNA primase, large subunit                                                               |
| TGME49_301222 | p.Leu15Ile   | missense_variant                               | DNA repair protein Rad4 domain-containing protein                                        |
| TGME49_301222 | p.Glu90Gly   | missense_variant                               | DNA repair protein Rad4 domain-containing protein                                        |
| TGME49_301222 | p.Ser123Pro  | missense_variant                               | DNA repair protein Rad4 domain-containing protein                                        |
| TGME49_301222 | p.Glu346Gln  | missense_variant                               | DNA repair protein Rad4 domain-containing protein                                        |
| TGME49_301222 | p.Gly446Ser  | missense_variant                               | DNA repair protein Rad4 domain-containing protein                                        |
| TGME49_301222 | p.Ser799Gly  | missense_variant                               | DNA repair protein Rad4 domain-containing protein                                        |
| TGME49_301222 | p.Pro1107Ser | missense_variant                               | DNA repair protein Rad4 domain-containing protein                                        |
| TGME49_301222 | p.Leu1230Pro | missense_variant                               | DNA repair protein Rad4 domain-containing protein                                        |
| TGME49_301222 | p.Ser1304Tyr | missense_variant                               | DNA repair protein Rad4 domain-containing protein                                        |
| TGME49_301222 | p.Asn1379Ser | missense_variant                               | DNA repair protein Rad4 domain-containing protein                                        |
| TGME49_219700 | c.-11T>G     | 5_prime_UTR_premature_start_codon_gain_variant | DNA replication licensing factor MCM4, putative                                          |
| TGME49_219700 | c.1088-4G>C  | splice_region_variant                          | DNA replication licensing factor MCM4, putative                                          |
| TGME49_277530 | p.Pro77Leu   | missense_variant                               | DNA topoisomerase domain-containing protein                                              |
| TGME49_277530 | p.Lys322Thr  | missense_variant                               | DNA topoisomerase domain-containing protein                                              |
| TGME49_277530 | p.Asp323His  | missense_variant                               | DNA topoisomerase domain-containing protein                                              |
| TGME49_277530 | p.Lys431Thr  | missense_variant                               | DNA topoisomerase domain-containing protein                                              |
| TGME49_277530 | p.Gln432Arg  | missense_variant                               | DNA topoisomerase domain-containing protein                                              |
| TGME49_277530 | p.Ala475Thr  | missense_variant                               | DNA topoisomerase domain-containing protein                                              |
| TGME49_277530 | p.Gln616Lys  | missense_variant                               | DNA topoisomerase domain-containing protein                                              |
| TGME49_277530 | p.Ser997Cys  | missense_variant                               | DNA topoisomerase domain-containing protein                                              |
| TGME49_277530 | p.Glu1077Gly | missense_variant                               | DNA topoisomerase domain-containing protein                                              |
| TGME49_277530 | p.Glu1082Asp | missense_variant                               | DNA topoisomerase domain-containing protein                                              |
| TGME49_234360 | p.Leu106Gln  | missense_variant                               | DNA topoisomerase I, putative                                                            |
| TGME49_234360 | p.Ala671Glu  | missense_variant                               | DNA topoisomerase I, putative                                                            |
| TGME49_246060 | p.Leu9Phe    | missense_variant                               | DNA-dependent RNA polymerase                                                             |
| TGME49_246060 | p.Ala343Gly  | missense_variant                               | DNA-dependent RNA polymerase                                                             |
| TGME49_246060 | p.His722Asn  | missense_variant                               | DNA-dependent RNA polymerase                                                             |
| TGME49_246060 | p.Gln1376His | missense_variant                               | DNA-dependent RNA polymerase                                                             |
| TGME49_246060 | p.Ile1824Met | missense_variant                               | DNA-dependent RNA polymerase                                                             |
| TGME49_249560 | p.Ala270Val  | missense_variant                               | DNA-directed RNA polymerase alpha chain rpoA                                             |
| TGME49_249560 | p.Lys600Glu  | missense_variant                               | DNA-directed RNA polymerase alpha chain rpoA                                             |
| TGME49_249560 | p.Pro619Gln  | missense_variant                               | DNA-directed RNA polymerase alpha chain rpoA                                             |
| TGME49_249560 | p.Arg646Cys  | missense_variant                               | DNA-directed RNA polymerase alpha chain rpoA                                             |
| TGME49_249560 | p.Leu706Pro  | missense_variant                               | DNA-directed RNA polymerase alpha chain rpoA                                             |
| TGME49_250060 | c.-392C>G    | 5_prime_UTR_premature_start_codon_gain_variant | DNA-directed RNA polymerase I RPA12                                                      |
| TGME49_250060 | p.Ala120Gly  | missense_variant                               | DNA-directed RNA polymerase I RPA12                                                      |
| TGME49_250060 | p.Asp209Gly  | missense_variant                               | DNA-directed RNA polymerase I RPA12                                                      |
| TGME49_297530 | c.1372-8T>C  | splice_region_variant                          | DNA-directed RNA polymerase I RPA2                                                       |
| TGME49_246630 | p.Ala361Val  | missense_variant                               | DNA-directed RNA polymerase I RPA43                                                      |
| TGME49_238190 | c.-477C>T    | 5_prime_UTR_premature_start_codon_gain_variant | DNA-directed RNA polymerase II RPB3                                                      |
| TGME49_238190 | p.Ala81Pro   | missense_variant                               | DNA-directed RNA polymerase II RPB3                                                      |

|               |              |                                                |                                                                   |
|---------------|--------------|------------------------------------------------|-------------------------------------------------------------------|
| TGME49_238190 | c.687+4G>A   | splice_region_variant                          | DNA-directed RNA polymerase II RPB3                               |
| TGME49_217580 | p.Ser17Ala   | missense_variant                               | DNA-directed RNA polymerase III RPC6                              |
| TGME49_254280 | p.Arg412Ser  | missense_variant                               | DNA-directed RNA polymerase III RPC9                              |
| TGME49_254280 | p.Thr410Met  | missense_variant                               | DNA-directed RNA polymerase III RPC9                              |
| TGME49_253650 | p.Asn489Ser  | missense_variant                               | DnaJ C terminal region domain-containing protein                  |
| TGME49_320060 | c.-855G>T    | 5_prime_UTR_premature_start_codon_gain_variant | DnaJ domain-containing protein                                    |
| TGME49_320060 | p.Leu71Ile   | missense_variant                               | DnaJ domain-containing protein                                    |
| TGME49_320060 | p.Ser156Pro  | missense_variant                               | DnaJ domain-containing protein                                    |
| TGME49_320060 | p.Leu421Val  | missense_variant                               | DnaJ domain-containing protein                                    |
| TGME49_320060 | p.Asp599His  | missense_variant                               | DnaJ domain-containing protein                                    |
| TGME49_320060 | c.*884C>T    | splice_region_variant                          | DnaJ domain-containing protein                                    |
| TGME49_301340 | c.751-5C>T   | splice_region_variant                          | DnaJ domain-containing protein                                    |
| TGME49_301340 | p.Ile288Leu  | missense_variant                               | DnaJ domain-containing protein                                    |
| TGME49_301340 | p.Gln651Glu  | missense_variant                               | DnaJ domain-containing protein                                    |
| TGME49_224670 | p.Glu2369Gln | missense_variant                               | DnaJ domain-containing protein                                    |
| TGME49_224670 | p.Tyr2281Asp | missense_variant                               | DnaJ domain-containing protein                                    |
| TGME49_224670 | p.Lys2024Arg | missense_variant                               | DnaJ domain-containing protein                                    |
| TGME49_224670 | p.Gln1339His | missense_variant                               | DnaJ domain-containing protein                                    |
| TGME49_224670 | p.His991Arg  | missense_variant                               | DnaJ domain-containing protein                                    |
| TGME49_224670 | p.Leu806Met  | missense_variant                               | DnaJ domain-containing protein                                    |
| TGME49_224670 | p.Ala706Val  | missense_variant                               | DnaJ domain-containing protein                                    |
| TGME49_224670 | p.Lys645Asn  | missense_variant                               | DnaJ domain-containing protein                                    |
| TGME49_224670 | p.Phe462Tyr  | missense_variant                               | DnaJ domain-containing protein                                    |
| TGME49_224670 | p.Ala419Ser  | missense_variant                               | DnaJ domain-containing protein                                    |
| TGME49_224670 | p.Met398Thr  | missense_variant                               | DnaJ domain-containing protein                                    |
| TGME49_224670 | c.-71C>G     | 5_prime_UTR_premature_start_codon_gain_variant | DnaJ domain-containing protein                                    |
| TGME49_214330 | p.Phe369Leu  | missense_variant                               | DnaJ domain-containing protein                                    |
| TGME49_214530 | p.Phe61Cys   | missense_variant                               | DnaJ domain-containing protein                                    |
| TGME49_214530 | p.Arg32Thr   | missense_variant                               | DnaJ domain-containing protein                                    |
| TGME49_246340 | c.-1332G>C   | 5_prime_UTR_premature_start_codon_gain_variant | DnaJ domain-containing protein                                    |
| TGME49_246340 | c.-501G>T    | 5_prime_UTR_premature_start_codon_gain_variant | DnaJ domain-containing protein                                    |
| TGME49_246340 | p.Leu30Phe   | missense_variant                               | DnaJ domain-containing protein                                    |
| TGME49_246340 | p.Ser871Thr  | missense_variant                               | DnaJ domain-containing protein                                    |
| TGME49_219310 | c.1463-6G>A  | splice_region_variant                          | DnaK family protein                                               |
| TGME49_219310 | p.Val553Ala  | missense_variant                               | DnaK family protein                                               |
| TGME49_214230 | p.Ala54Pro   | missense_variant                               | Dopey, N-terminal domain-containing protein                       |
| TGME49_214230 | p.Ser746Pro  | missense_variant                               | Dopey, N-terminal domain-containing protein                       |
| TGME49_214230 | p.Leu1054Val | missense_variant                               | Dopey, N-terminal domain-containing protein                       |
| TGME49_214230 | p.Tyr1180Ser | missense_variant                               | Dopey, N-terminal domain-containing protein                       |
| TGME49_214230 | p.Leu1193Phe | missense_variant                               | Dopey, N-terminal domain-containing protein                       |
| TGME49_214230 | p.His1486Arg | missense_variant                               | Dopey, N-terminal domain-containing protein                       |
| TGME49_215410 | c.-440C>T    | 5_prime_UTR_premature_start_codon_gain_variant | DPCD family protein                                               |
| TGME49_215410 | p.Lys16Glu   | missense_variant                               | DPCD family protein                                               |
| TGME49_221500 | p.Asp785Glu  | missense_variant                               | dual specificity phosphatase, catalytic domain-containing protein |
| TGME49_221500 | p.Arg671Ser  | missense_variant                               | dual specificity phosphatase, catalytic domain-containing protein |
| TGME49_221500 | p.Lys363Thr  | missense_variant                               | dual specificity phosphatase, catalytic domain-containing protein |
| TGME49_221500 | p.Ser258Arg  | missense_variant                               | dual specificity phosphatase, catalytic domain-containing protein |
| TGME49_221590 | p.Arg103Lys  | missense_variant                               | dual specificity phosphatase, catalytic domain-containing protein |
| TGME49_221590 | p.Pro125Ser  | missense_variant                               | dual specificity phosphatase, catalytic domain-containing protein |
| TGME49_221590 | c.724-8C>T   | splice_region_variant                          | dual specificity phosphatase, catalytic domain-containing protein |
| TGME49_235890 | p.Ser43Asn   | missense_variant                               | dual-specificity protein phosphatase                              |
| TGME49_235890 | p.Val39Ala   | missense_variant                               | dual-specificity protein phosphatase                              |
| TGME49_235890 | p.Gly34Cys   | missense_variant                               | dual-specificity protein phosphatase                              |
| TGME49_235890 | p.Lys21Thr   | missense_variant                               | dual-specificity protein phosphatase                              |
| TGME49_235890 | c.-641T>C    | 5_prime_UTR_premature_start_codon_gain_variant | dual-specificity protein phosphatase                              |
| TGME49_236530 | c.-556T>C    | 5_prime_UTR_premature_start_codon_gain_variant | DUF298 domain-containing protein                                  |
| TGME49_211300 | p.Val62Leu   | missense_variant                               | DUF74 family protein, putative                                    |
| TGME49_249840 | c.467+8C>T   | splice_region_variant                          | dynein heavy chain 2, putative                                    |
| TGME49_249840 | p.Ala688Thr  | missense_variant                               | dynein heavy chain 2, putative                                    |
| TGME49_249840 | c.2394+8T>A  | splice_region_variant                          | dynein heavy chain 2, putative                                    |
| TGME49_249840 | p.Ala881Thr  | missense_variant                               | dynein heavy chain 2, putative                                    |
| TGME49_249840 | p.Gln1149His | missense_variant                               | dynein heavy chain 2, putative                                    |
| TGME49_247560 | c.212-6T>C   | splice_region_variant                          | dynein light chain protein, putative                              |
| TGME49_235920 | p.Ile4341Thr | missense_variant                               | dynein, axonemal, heavy chain 2 family protein                    |
| TGME49_235920 | p.Lys4310Thr | missense_variant                               | dynein, axonemal, heavy chain 2 family protein                    |
| TGME49_235920 | p.Pro3502Ser | missense_variant                               | dynein, axonemal, heavy chain 2 family protein                    |
| TGME49_235920 | p.Asp3133Asn | missense_variant                               | dynein, axonemal, heavy chain 2 family protein                    |
| TGME49_235920 | p.Ile3014Val | missense_variant                               | dynein, axonemal, heavy chain 2 family protein                    |
| TGME49_235920 | p.Leu2702Phe | missense_variant                               | dynein, axonemal, heavy chain 2 family protein                    |
| TGME49_235920 | c.7552-5A>T  | splice_region_variant                          | dynein, axonemal, heavy chain 2 family protein                    |
| TGME49_235920 | c.6958-3T>C  | splice_region_variant                          | dynein, axonemal, heavy chain 2 family protein                    |
| TGME49_235920 | p.Asp2159Ala | missense_variant                               | dynein, axonemal, heavy chain 2 family protein                    |
| TGME49_235920 | p.His1533Asn | missense_variant                               | dynein, axonemal, heavy chain 2 family protein                    |
| TGME49_219080 | c.-119T>C    | 5_prime_UTR_premature_start_codon_gain_variant | edge expressed protein, putative                                  |
| TGME49_219080 | p.Thr231Asn  | missense_variant                               | edge expressed protein, putative                                  |
| TGME49_223520 | p.Ala51Val   | missense_variant                               | EF hand domain-containing protein                                 |
| TGME49_223520 | p.Leu174Val  | missense_variant                               | EF hand domain-containing protein                                 |
| TGME49_275790 | p.Leu92Val   | missense_variant                               | EGF family domain-containing protein                              |
| TGME49_275790 | p.Leu233Phe  | missense_variant                               | EGF family domain-containing protein                              |
| TGME49_238210 | p.Glu303Asp  | missense_variant                               | EGF family domain-containing protein                              |
| TGME49_238220 | p.Leu54Ile   | missense_variant                               | EGF family domain-containing protein                              |
| TGME49_319610 | c.-493T>G    | 5_prime_UTR_premature_start_codon_gain_variant | eIF2 kinase IF2K-D (incomplete catalytic triad)                   |
| TGME49_319610 | p.Cys87Phe   | missense_variant                               | eIF2 kinase IF2K-D (incomplete catalytic triad)                   |
| TGME49_319610 | p.Arg220Gln  | missense_variant                               | eIF2 kinase IF2K-D (incomplete catalytic triad)                   |
| TGME49_319610 | p.Gly304Glu  | missense_variant                               | eIF2 kinase IF2K-D (incomplete catalytic triad)                   |

|               |              |                                                |                                                                              |
|---------------|--------------|------------------------------------------------|------------------------------------------------------------------------------|
| TGME49_319610 | p.Arg400Ser  | missense_variant                               | eIF2 kinase IF2K-D (incomplete catalytic triad)                              |
| TGME49_319610 | p.Ala533Thr  | missense_variant                               | eIF2 kinase IF2K-D (incomplete catalytic triad)                              |
| TGME49_319610 | p.Arg575Gly  | missense_variant                               | eIF2 kinase IF2K-D (incomplete catalytic triad)                              |
| TGME49_319610 | p.Ala902Pro  | missense_variant                               | eIF2 kinase IF2K-D (incomplete catalytic triad)                              |
| TGME49_319610 | p.Leu1554Arg | missense_variant                               | eIF2 kinase IF2K-D (incomplete catalytic triad)                              |
| TGME49_319610 | p.Thr1662Met | missense_variant                               | eIF2 kinase IF2K-D (incomplete catalytic triad)                              |
| TGME49_319610 | p.Thr2038Ala | missense_variant                               | eIF2 kinase IF2K-D (incomplete catalytic triad)                              |
| TGME49_319610 | p.Ala2165Thr | missense_variant                               | eIF2 kinase IF2K-D (incomplete catalytic triad)                              |
| TGME49_319610 | p.Ala2251Thr | missense_variant                               | eIF2 kinase IF2K-D (incomplete catalytic triad)                              |
| TGME49_319610 | p.Gly2338Val | missense_variant                               | eIF2 kinase IF2K-D (incomplete catalytic triad)                              |
| TGME49_319610 | p.Asn2774Ser | missense_variant                               | eIF2 kinase IF2K-D (incomplete catalytic triad)                              |
| TGME49_207250 | p.Val255Ile  | missense_variant                               | electron-transfer-flavoprotein, alpha polypeptide                            |
| TGME49_253000 | p.Asp418Asn  | missense_variant                               | ELMO/CED-12 family protein                                                   |
| TGME49_218790 | c.-1098C>T   | 5_prime_UTR_premature_start_codon_gain_variant | elongation factor G C-terminus domain-containing protein                     |
| TGME49_218790 | c.-164C>G    | 5_prime_UTR_premature_start_codon_gain_variant | elongation factor G C-terminus domain-containing protein                     |
| TGME49_218790 | p.Arg179Gln  | missense_variant                               | elongation factor G C-terminus domain-containing protein                     |
| TGME49_222070 | c.-481C>T    | 5_prime_UTR_premature_start_codon_gain_variant | elongation factor Tu GTP binding domain-containing protein                   |
| TGME49_222070 | p.His135Arg  | missense_variant                               | elongation factor Tu GTP binding domain-containing protein                   |
| TGME49_320150 | p.Ala910Thr  | missense_variant                               | elongation factor Tu GTP binding domain-containing protein                   |
| TGME49_320150 | p.Ala686Pro  | missense_variant                               | elongation factor Tu GTP binding domain-containing protein                   |
| TGME49_320150 | p.Val531Ala  | missense_variant                               | elongation factor Tu GTP binding domain-containing protein                   |
| TGME49_320150 | p.Ser530Tyr  | missense_variant                               | elongation factor Tu GTP binding domain-containing protein                   |
| TGME49_320150 | p.Ser525Ala  | missense_variant                               | elongation factor Tu GTP binding domain-containing protein                   |
| TGME49_320150 | p.Ala521Gly  | missense_variant                               | elongation factor Tu GTP binding domain-containing protein                   |
| TGME49_320150 | p.Asn493Asp  | missense_variant                               | elongation factor Tu GTP binding domain-containing protein                   |
| TGME49_320150 | p.Leu480Pro  | missense_variant                               | elongation factor Tu GTP binding domain-containing protein                   |
| TGME49_320150 | p.Leu480Phe  | missense_variant                               | elongation factor Tu GTP binding domain-containing protein                   |
| TGME49_320150 | p.Leu325Phe  | missense_variant                               | elongation factor Tu GTP binding domain-containing protein                   |
| TGME49_320150 | p.Asp255Glu  | missense_variant                               | elongation factor Tu GTP binding domain-containing protein                   |
| TGME49_320150 | p.Glu231Val  | missense_variant                               | elongation factor Tu GTP binding domain-containing protein                   |
| TGME49_320150 | p.Glu231*    | stop_gained                                    | elongation factor Tu GTP binding domain-containing protein                   |
| TGME49_320150 | p.Thr230Ile  | missense_variant                               | elongation factor Tu GTP binding domain-containing protein                   |
| TGME49_320150 | p.Phe38Leu   | missense_variant                               | elongation factor Tu GTP binding domain-containing protein                   |
| TGME49_320150 | c.-102G>A    | 5_prime_UTR_premature_start_codon_gain_variant | elongation factor Tu GTP binding domain-containing protein                   |
| TGME49_320150 | c.-105G>A    | 5_prime_UTR_premature_start_codon_gain_variant | elongation factor Tu GTP binding domain-containing protein                   |
| TGME49_301380 | c.3002+6C>T  | splice_region_variant                          | elongation factor Tu GTP binding domain-containing protein                   |
| TGME49_301380 | c.1819+7C>T  | splice_region_variant                          | elongation factor Tu GTP binding domain-containing protein                   |
| TGME49_301380 | p.Gly405Val  | missense_variant                               | elongation factor Tu GTP binding domain-containing protein                   |
| TGME49_301380 | p.Ser308Asn  | missense_variant                               | elongation factor Tu GTP binding domain-containing protein                   |
| TGME49_301380 | p.Phe304Cys  | missense_variant                               | elongation factor Tu GTP binding domain-containing protein                   |
| TGME49_301380 | p.Ser279Ala  | missense_variant                               | elongation factor Tu GTP binding domain-containing protein                   |
| TGME49_301380 | p.Pro278Thr  | missense_variant                               | elongation factor Tu GTP binding domain-containing protein                   |
| TGME49_301380 | c.-487A>T    | 5_prime_UTR_premature_start_codon_gain_variant | elongation factor Tu GTP binding domain-containing protein                   |
| TGME49_278550 | p.Arg2202Thr | missense_variant&splice_region_variant         | elongation factor Tu GTP binding domain-containing protein                   |
| TGME49_278550 | p.Val1540Ala | missense_variant                               | elongation factor Tu GTP binding domain-containing protein                   |
| TGME49_278550 | p.Val1540Leu | missense_variant                               | elongation factor Tu GTP binding domain-containing protein                   |
| TGME49_278550 | p.Val44Ala   | missense_variant                               | elongation factor Tu GTP binding domain-containing protein                   |
| TGME49_278550 | p.Ser366Arg  | missense_variant                               | elongation factor Tu GTP binding domain-containing protein                   |
| TGME49_278550 | p.Ala251Thr  | missense_variant                               | elongation factor Tu GTP binding domain-containing protein                   |
| TGME49_278550 | p.Arg168Pro  | missense_variant                               | elongation factor Tu GTP binding domain-containing protein                   |
| TGME49_254350 | p.Arg18Gly   | missense_variant                               | endo-1,3(4)-beta-glucanase                                                   |
| TGME49_238400 | p.Pro925Gln  | missense_variant                               | endonuclease/exonuclease/phosphatase domain-containing protein               |
| TGME49_238400 | p.Glu969Lys  | missense_variant                               | endonuclease/exonuclease/phosphatase domain-containing protein               |
| TGME49_238400 | p.Gln1837Arg | missense_variant                               | endonuclease/exonuclease/phosphatase domain-containing protein               |
| TGME49_238400 | p.Ser1967Asn | missense_variant                               | endonuclease/exonuclease/phosphatase domain-containing protein               |
| TGME49_238400 | p.His1968Leu | missense_variant                               | endonuclease/exonuclease/phosphatase domain-containing protein               |
| TGME49_238400 | p.Ala2076Val | missense_variant                               | endonuclease/exonuclease/phosphatase domain-containing protein               |
| TGME49_238400 | p.Thr2304Ile | missense_variant                               | endonuclease/exonuclease/phosphatase domain-containing protein               |
| TGME49_238400 | p.Gln2578Glu | missense_variant                               | endonuclease/exonuclease/phosphatase domain-containing protein               |
| TGME49_238400 | p.Ala2628Pro | missense_variant                               | endonuclease/exonuclease/phosphatase domain-containing protein               |
| TGME49_301216 | p.Thr202Lys  | missense_variant                               | endonuclease/exonuclease/phosphatase family protein                          |
| TGME49_301216 | p.Pro199Ala  | missense_variant                               | endonuclease/exonuclease/phosphatase family protein                          |
| TGME49_276910 | c.-1772T>C   | 5_prime_UTR_premature_start_codon_gain_variant | endoplasmic reticulum lumen protein retaining receptor (ERD2) family protein |
| TGME49_254740 | p.Ile62Val   | missense_variant                               | endoribonuclease L-PSP protein                                               |
| TGME49_251930 | c.-50G>A     | 5_prime_UTR_premature_start_codon_gain_variant | enoyl-acyl carrier reductase ENR                                             |
| TGME49_224090 | c.-348A>G    | 5_prime_UTR_premature_start_codon_gain_variant | enoyl-CoA hydratase/isomerase family protein                                 |
| TGME49_224090 | p.Gly124Ala  | missense_variant                               | enoyl-CoA hydratase/isomerase family protein                                 |
| TGME49_224090 | c.967+8C>G   | splice_region_variant                          | enoyl-CoA hydratase/isomerase family protein                                 |
| TGME49_214180 | c.-719C>T    | 5_prime_UTR_premature_start_codon_gain_variant | ENTH domain-containing protein                                               |
| TGME49_214760 | p.Val239Ile  | missense_variant                               | erythronate-4-phosphate dehydrogenase domain-containing protein              |
| TGME49_249350 | c.-1082C>G   | 5_prime_UTR_premature_start_codon_gain_variant | esterase/lipase/thioesterase domain-containing protein                       |
| TGME49_235540 | c.-198C>T    | 5_prime_UTR_premature_start_codon_gain_variant | eukaryotic initiation factor-2 beta, putative                                |
| TGME49_235970 | c.549+7C>A   | splice_region_variant                          | eukaryotic initiation factor-2 gamma, putative                               |
| TGME49_235970 | c.1290+8A>G  | splice_region_variant                          | eukaryotic initiation factor-2 gamma, putative                               |
| TGME49_211230 | p.Gly47Arg   | missense_variant                               | eukaryotic initiation factor-2B, alpha subunit, putative                     |
| TGME49_211230 | p.Glu26Gln   | missense_variant                               | eukaryotic initiation factor-2B, alpha subunit, putative                     |
| TGME49_315150 | p.Lys109Thr  | missense_variant                               | eukaryotic initiation factor-4E, putative                                    |
| TGME49_318700 | c.-552A>C    | 5_prime_UTR_premature_start_codon_gain_variant | eukaryotic initiation factor-6, putative                                     |
| TGME49_317720 | c.340+4A>G   | splice_region_variant                          | eukaryotic translation initiation factor 3 subunit 7, putative               |
| TGME49_237020 | p.Phe1354Leu | missense_variant                               | exonuclease                                                                  |
| TGME49_237020 | c.1319-6C>T  | splice_region_variant                          | exonuclease                                                                  |
| TGME49_224860 | c.457-7T>C   | splice_region_variant                          | exosome component 2, putative                                                |
| TGME49_224860 | p.Ala16Val   | missense_variant                               | exosome component 2, putative                                                |
| TGME49_224860 | c.-268C>A    | 5_prime_UTR_premature_start_codon_gain_variant | exosome component 2, putative                                                |
| TGME49_219290 | c.-544T>A    | 5_prime_UTR_premature_start_codon_gain_variant | F-actin-capping protein subunit beta, putative                               |

|               |              |                                                |                                                                                |
|---------------|--------------|------------------------------------------------|--------------------------------------------------------------------------------|
| TGME49_219290 | c.-644C>G    | 5_prime_UTR_premature_start_codon_gain_variant | F-actin-capping protein subunit beta, putative                                 |
| TGME49_299230 | p.Pro522His  | missense_variant                               | F-box domain-containing protein                                                |
| TGME49_299230 | p.Pro525Ser  | missense_variant                               | F-box domain-containing protein                                                |
| TGME49_223700 | c.3938+7T>C  | splice_region_variant                          | F5/8 type C domain-containing protein                                          |
| TGME49_223700 | p.Met1058Leu | missense_variant                               | F5/8 type C domain-containing protein                                          |
| TGME49_223830 | p.Thr13Ala   | missense_variant                               | fasciclin domain-containing protein                                            |
| TGME49_248530 | p.Val2172Leu | missense_variant                               | FATC domain-containing protein                                                 |
| TGME49_248530 | c.5149+6G>A  | splice_region_variant                          | FATC domain-containing protein                                                 |
| TGME49_248530 | c.4788-4T>C  | splice_region_variant                          | FATC domain-containing protein                                                 |
| TGME49_248530 | p.Gly1532Ser | missense_variant                               | FATC domain-containing protein                                                 |
| TGME49_248530 | c.4077+6G>T  | splice_region_variant                          | FATC domain-containing protein                                                 |
| TGME49_248530 | p.Ala1286Thr | missense_variant                               | FATC domain-containing protein                                                 |
| TGME49_248530 | p.Asn1278Ser | missense_variant                               | FATC domain-containing protein                                                 |
| TGME49_248530 | p.Gly1273Asp | missense_variant                               | FATC domain-containing protein                                                 |
| TGME49_248530 | p.Ala1250Gly | missense_variant                               | FATC domain-containing protein                                                 |
| TGME49_248530 | p.Ser866Ile  | missense_variant                               | FATC domain-containing protein                                                 |
| TGME49_248530 | p.Cys830Trp  | missense_variant                               | FATC domain-containing protein                                                 |
| TGME49_248530 | p.Met757Thr  | missense_variant                               | FATC domain-containing protein                                                 |
| TGME49_248530 | p.Pro520Ala  | missense_variant                               | FATC domain-containing protein                                                 |
| TGME49_248530 | p.Val239Leu  | missense_variant                               | FATC domain-containing protein                                                 |
| TGME49_248530 | p.Ala76Pro   | missense_variant                               | FATC domain-containing protein                                                 |
| TGME49_238950 | p.Arg176His  | missense_variant                               | fatty acyl-CoA desaturase, putative                                            |
| TGME49_277010 | p.Arg156Pro  | missense_variant                               | Fe-S metabolism associated domain-containing protein                           |
| TGME49_210750 | p.Glu746Gln  | missense_variant                               | Ferredoxin-fold anticodon binding domain-containing protein                    |
| TGME49_210750 | p.Arg377Gly  | missense_variant                               | Ferredoxin-fold anticodon binding domain-containing protein                    |
| TGME49_236000 | p.Ser14Leu   | missense_variant                               | ferredoxin, putative                                                           |
| TGME49_301450 | p.Ala58Ser   | missense_variant                               | FG-GAP repeat-containing protein                                               |
| TGME49_301450 | p.Ala663Pro  | missense_variant                               | FG-GAP repeat-containing protein                                               |
| TGME49_301450 | p.Ala1087Glu | missense_variant                               | FG-GAP repeat-containing protein                                               |
| TGME49_224040 | p.Ala220Thr  | missense_variant                               | flagellar associated protein                                                   |
| TGME49_251620 | p.Ala487Glu  | missense_variant                               | flap structure-specific endonuclease 1, putative                               |
| TGME49_251620 | c.-154A>G    | 5_prime_UTR_premature_start_codon_gain_variant | flap structure-specific endonuclease 1, putative                               |
| TGME49_251620 | c.-419T>G    | 5_prime_UTR_premature_start_codon_gain_variant | flap structure-specific endonuclease 1, putative                               |
| TGME49_219630 | p.Leu136Val  | missense_variant                               | flavodoxin domain-containing protein                                           |
| TGME49_219630 | p.Ser553Pro  | missense_variant                               | flavodoxin domain-containing protein                                           |
| TGME49_219630 | p.Ala928Ser  | missense_variant                               | flavodoxin domain-containing protein                                           |
| TGME49_249320 | c.2893-3T>C  | splice_region_variant                          | flavodoxin domain-containing protein                                           |
| TGME49_249320 | p.Cys677Tyr  | missense_variant                               | flavodoxin domain-containing protein                                           |
| TGME49_249320 | c.1771-7T>C  | splice_region_variant                          | flavodoxin domain-containing protein                                           |
| TGME49_249320 | p.Val21Ile   | missense_variant                               | flavodoxin domain-containing protein                                           |
| TGME49_235640 | p.Pro100Leu  | missense_variant                               | formyl transferase domain-containing protein                                   |
| TGME49_235640 | p.Arg283His  | missense_variant                               | formyl transferase domain-containing protein                                   |
| TGME49_235640 | p.Leu479His  | missense_variant                               | formyl transferase domain-containing protein                                   |
| TGME49_235640 | p.Asp574Asn  | missense_variant                               | formyl transferase domain-containing protein                                   |
| TGME49_236040 | c.-363T>C    | 5_prime_UTR_premature_start_codon_gain_variant | fructose-1,6-bisphosphate aldolase                                             |
| TGME49_307770 | p.Thr1108Arg | missense_variant                               | fumble protein                                                                 |
| TGME49_237870 | c.-300G>T    | 5_prime_UTR_premature_start_codon_gain_variant | FYVE zinc finger domain-containing protein                                     |
| TGME49_237870 | c.565-5T>G   | splice_region_variant                          | FYVE zinc finger domain-containing protein                                     |
| TGME49_237870 | p.Ser324Asn  | missense_variant                               | FYVE zinc finger domain-containing protein                                     |
| TGME49_278040 | c.-586T>A    | 5_prime_UTR_premature_start_codon_gain_variant | G-patch domain-containing protein                                              |
| TGME49_278040 | c.-175G>C    | 5_prime_UTR_premature_start_codon_gain_variant | G-patch domain-containing protein                                              |
| TGME49_223940 | c.-976T>C    | 5_prime_UTR_premature_start_codon_gain_variant | GAP45                                                                          |
| TGME49_253930 | p.Gly18Cys   | missense_variant                               | GCC2 and GCC3 domain-containing protein                                        |
| TGME49_253930 | p.Arg20Trp   | missense_variant                               | GCC2 and GCC3 domain-containing protein                                        |
| TGME49_253930 | p.Ala220Pro  | missense_variant                               | GCC2 and GCC3 domain-containing protein                                        |
| TGME49_253930 | p.Thr578Ala  | missense_variant                               | GCC2 and GCC3 domain-containing protein                                        |
| TGME49_253930 | p.Thr1090Ile | missense_variant                               | GCC2 and GCC3 domain-containing protein                                        |
| TGME49_253930 | p.Pro1595Ser | missense_variant                               | GCC2 and GCC3 domain-containing protein                                        |
| TGME49_253930 | c.5362+8T>C  | splice_region_variant                          | GCC2 and GCC3 domain-containing protein                                        |
| TGME49_253930 | c.7554+3T>A  | splice_region_variant                          | GCC2 and GCC3 domain-containing protein                                        |
| TGME49_278878 | p.Gln238His  | missense_variant                               | GDA1/CD39 (nucleoside phosphatase) family protein                              |
| TGME49_278878 | p.Met155Val  | missense_variant                               | GDA1/CD39 (nucleoside phosphatase) family protein                              |
| TGME49_278878 | p.Ile96Val   | missense_variant                               | GDA1/CD39 (nucleoside phosphatase) family protein                              |
| TGME49_278878 | p.Glu52Asp   | missense_variant                               | GDA1/CD39 (nucleoside phosphatase) family protein                              |
| TGME49_278878 | p.Met1?      | start_lost                                     | GDA1/CD39 (nucleoside phosphatase) family protein                              |
| TGME49_277720 | p.Glu75Gly   | missense_variant                               | GDA1/CD39 (nucleoside phosphatase) family protein                              |
| TGME49_214520 | p.Ala28Thr   | missense_variant                               | general transcription factor IIH polypeptide 4 GTF2H4                          |
| TGME49_217450 | p.Leu97Gln   | missense_variant                               | general transcription factor IIH polypeptide 5 GTF2H5                          |
| TGME49_217450 | p.Ser51Asn   | missense_variant                               | general transcription factor IIH polypeptide 5 GTF2H5                          |
| TGME49_212170 | p.Arg240Thr  | missense_variant                               | GIY-YIG catalytic domain-containing protein                                    |
| TGME49_212170 | p.Asp291Asn  | missense_variant                               | GIY-YIG catalytic domain-containing protein                                    |
| TGME49_212170 | p.Gly1080Arg | missense_variant                               | GIY-YIG catalytic domain-containing protein                                    |
| TGME49_318580 | p.Ser365Ala  | missense_variant                               | glucosephosphate-mutase GPM2                                                   |
| TGME49_249390 | c.-400C>G    | 5_prime_UTR_premature_start_codon_gain_variant | glutamate/leucine/phenylalanine/valine dehydrogenase family protein            |
| TGME49_249390 | p.Asp744Glu  | missense_variant                               | glutamate/leucine/phenylalanine/valine dehydrogenase family protein            |
| TGME49_217460 | p.Pro164Leu  | missense_variant                               | glutaminyl-tRNA synthetase (GlnRS)                                             |
| TGME49_217460 | p.Val127Ile  | missense_variant                               | glutaminyl-tRNA synthetase (GlnRS)                                             |
| TGME49_238070 | c.144+6C>A   | splice_region_variant                          | glutaredoxin domain-containing protein                                         |
| TGME49_246920 | c.-255C>T    | 5_prime_UTR_premature_start_codon_gain_variant | glutathione reductase                                                          |
| TGME49_249630 | p.Met353Leu  | missense_variant                               | glutathione S-transferase, N-terminal domain-containing protein                |
| TGME49_249630 | c.-334C>G    | 5_prime_UTR_premature_start_codon_gain_variant | glutathione S-transferase, N-terminal domain-containing protein                |
| TGME49_237470 | c.-1501C>T   | 5_prime_UTR_premature_start_codon_gain_variant | glycine cleavage T-protein (aminomethyl transferase) domain-containing protein |
| TGME49_237470 | c.-43A>G     | 5_prime_UTR_premature_start_codon_gain_variant | glycine cleavage T-protein (aminomethyl transferase) domain-containing protein |
| TGME49_237470 | p.Leu172Val  | missense_variant                               | glycine cleavage T-protein (aminomethyl transferase) domain-containing protein |
| TGME49_237470 | p.Ser200Tyr  | missense_variant                               | glycine cleavage T-protein (aminomethyl transferase) domain-containing protein |



|               |              |                                                |                                                                                |
|---------------|--------------|------------------------------------------------|--------------------------------------------------------------------------------|
| TGME49_237470 | p.Lys314Met  | missense_variant                               | glycine cleavage T-protein (aminomethyl transferase) domain-containing protein |
| TGME49_237470 | p.Ala327Ser  | missense_variant                               | glycine cleavage T-protein (aminomethyl transferase) domain-containing protein |
| TGME49_237470 | p.Gly350Glu  | missense_variant                               | glycine cleavage T-protein (aminomethyl transferase) domain-containing protein |
| TGME49_237470 | p.Pro358Leu  | missense_variant                               | glycine cleavage T-protein (aminomethyl transferase) domain-containing protein |
| TGME49_237470 | p.Gln614Arg  | missense_variant                               | glycine cleavage T-protein (aminomethyl transferase) domain-containing protein |
| TGME49_222800 | p.Pro2047Leu | missense_variant                               | glycogen synthase, putative                                                    |
| TGME49_222800 | p.Thr2036Ser | missense_variant                               | glycogen synthase, putative                                                    |
| TGME49_222800 | p.Arg1858Lys | missense_variant                               | glycogen synthase, putative                                                    |
| TGME49_222800 | p.Cys1838Phe | missense_variant                               | glycogen synthase, putative                                                    |
| TGME49_222800 | p.Pro1793Leu | missense_variant                               | glycogen synthase, putative                                                    |
| TGME49_222800 | p.Leu1631Pro | missense_variant                               | glycogen synthase, putative                                                    |
| TGME49_222800 | p.Thr1533Ser | missense_variant                               | glycogen synthase, putative                                                    |
| TGME49_222800 | p.Asn1423Asp | missense_variant                               | glycogen synthase, putative                                                    |
| TGME49_222800 | c.4219+4G>A  | splice_region_variant                          | glycogen synthase, putative                                                    |
| TGME49_222800 | p.Pro204Ala  | missense_variant                               | glycogen synthase, putative                                                    |
| TGME49_222800 | p.Asp138Glu  | missense_variant                               | glycogen synthase, putative                                                    |
| TGME49_253030 | p.Gln557Glu  | missense_variant                               | glycosyl hydrolase, family 31 protein                                          |
| TGME49_318730 | p.Arg72His   | missense_variant                               | glycosyl transferase                                                           |
| TGME49_318730 | c.-487A>G    | 5_prime_UTR_premature_start_codon_gain_variant | glycosyl transferase                                                           |
| TGME49_207070 | p.Arg307Lys  | missense_variant                               | glycosyl transferase, putative                                                 |
| TGME49_207070 | p.Leu52Val   | missense_variant                               | glycosyl transferase, putative                                                 |
| TGME49_248400 | p.Pro6Ser    | missense_variant                               | glyoxalase I, putative                                                         |
| TGME49_248400 | c.-72G>T     | 5_prime_UTR_premature_start_codon_gain_variant | glyoxalase I, putative                                                         |
| TGME49_253880 | p.Ala319Thr  | missense_variant                               | GNS1/SUR4 family protein                                                       |
| TGME49_253880 | p.Ala524Val  | missense_variant                               | GNS1/SUR4 family protein                                                       |
| TGME49_275568 | p.Gln59His   | missense_variant                               | GPI transamidase subunit PIG-U protein                                         |
| TGME49_214920 | c.-738C>T    | 5_prime_UTR_premature_start_codon_gain_variant | GPI-anchored wall transfer protein GWT1 , putative                             |
| TGME49_214920 | c.-315C>G    | 5_prime_UTR_premature_start_codon_gain_variant | GPI-anchored wall transfer protein GWT1 , putative                             |
| TGME49_214920 | p.Ala7Thr    | missense_variant                               | GPI-anchored wall transfer protein GWT1 , putative                             |
| TGME49_214920 | p.Leu22Met   | missense_variant                               | GPI-anchored wall transfer protein GWT1 , putative                             |
| TGME49_214920 | p.Phe191Ser  | missense_variant                               | GPI-anchored wall transfer protein GWT1 , putative                             |
| TGME49_214920 | c.1408+6A>G  | splice_region_variant                          | GPI-anchored wall transfer protein GWT1 , putative                             |
| TGME49_214920 | p.Val735Leu  | missense_variant                               | GPI-anchored wall transfer protein GWT1 , putative                             |
| TGME49_308000 | c.-894C>T    | 5_prime_UTR_premature_start_codon_gain_variant | Gpi16 subunit, GPI transamidase component protein                              |
| TGME49_308000 | c.-105C>G    | 5_prime_UTR_premature_start_codon_gain_variant | Gpi16 subunit, GPI transamidase component protein                              |
| TGME49_308000 | c.-98G>A     | 5_prime_UTR_premature_start_codon_gain_variant | Gpi16 subunit, GPI transamidase component protein                              |
| TGME49_308000 | p.Glu99Ala   | missense_variant                               | Gpi16 subunit, GPI transamidase component protein                              |
| TGME49_308000 | p.Val186Leu  | missense_variant                               | Gpi16 subunit, GPI transamidase component protein                              |
| TGME49_308000 | p.Pro542Leu  | missense_variant                               | Gpi16 subunit, GPI transamidase component protein                              |
| TGME49_308000 | p.Leu677Phe  | missense_variant                               | Gpi16 subunit, GPI transamidase component protein                              |
| TGME49_224600 | c.771+3A>G   | splice_region_variant                          | GTP binding protein                                                            |
| TGME49_224600 | c.-543G>T    | 5_prime_UTR_premature_start_codon_gain_variant | GTP binding protein                                                            |
| TGME49_253780 | p.Ser294Asn  | missense_variant                               | GTP cyclohydrolase I, putative                                                 |
| TGME49_217760 | p.Gly89Ala   | missense_variant                               | GTP-binding protein                                                            |
| TGME49_217760 | p.Gly89Ser   | missense_variant                               | GTP-binding protein                                                            |
| TGME49_217760 | c.225+7C>G   | splice_region_variant                          | GTP-binding protein                                                            |
| TGME49_211480 | p.Ser1175Cys | missense_variant                               | GTP-binding protein engA, putative                                             |
| TGME49_211480 | c.2830+6C>A  | splice_region_variant                          | GTP-binding protein engA, putative                                             |
| TGME49_211480 | c.2331+6T>A  | splice_region_variant                          | GTP-binding protein engA, putative                                             |
| TGME49_211480 | p.Asn623Ile  | missense_variant                               | GTP-binding protein engA, putative                                             |
| TGME49_211480 | p.Gln405Glu  | missense_variant                               | GTP-binding protein engA, putative                                             |
| TGME49_211480 | p.Arg364Thr  | missense_variant                               | GTP-binding protein engA, putative                                             |
| TGME49_307980 | p.Pro27Ser   | missense_variant                               | GTP-binding protein lepA, putative                                             |
| TGME49_307980 | c.1365+6G>A  | splice_region_variant                          | GTP-binding protein lepA, putative                                             |
| TGME49_278730 | c.-525C>T    | 5_prime_UTR_premature_start_codon_gain_variant | guanine nucleotide-binding protein, putative                                   |
| TGME49_278730 | p.Glu87Gly   | missense_variant                               | guanine nucleotide-binding protein, putative                                   |
| TGME49_278730 | p.Trp90Arg   | missense_variant                               | guanine nucleotide-binding protein, putative                                   |
| TGME49_278730 | p.Cys616Tyr  | missense_variant                               | guanine nucleotide-binding protein, putative                                   |
| TGME49_254370 | p.Met43Val   | missense_variant                               | guanylyl cyclase                                                               |
| TGME49_254370 | p.Met1180Ile | missense_variant                               | guanylyl cyclase                                                               |
| TGME49_254370 | c.9436+5T>G  | splice_region_variant                          | guanylyl cyclase                                                               |
| TGME49_254370 | p.Pro3503Ala | missense_variant                               | guanylyl cyclase                                                               |
| TGME49_254370 | p.Ala3543Ser | missense_variant                               | guanylyl cyclase                                                               |
| TGME49_254370 | p.Gly3588Glu | missense_variant                               | guanylyl cyclase                                                               |
| TGME49_254370 | p.Pro3625Gln | missense_variant                               | guanylyl cyclase                                                               |
| TGME49_224610 | p.Thr681Asn  | missense_variant                               | GYF domain-containing protein                                                  |
| TGME49_224610 | p.Gly692Asp  | missense_variant                               | GYF domain-containing protein                                                  |
| TGME49_222010 | c.1698+8T>C  | splice_region_variant                          | HAD hydrolase, family IIID protein                                             |
| TGME49_222010 | p.Ala369Thr  | missense_variant                               | HAD hydrolase, family IIID protein                                             |
| TGME49_222010 | p.Arg241Ser  | missense_variant                               | HAD hydrolase, family IIID protein                                             |
| TGME49_222010 | c.-427G>C    | 5_prime_UTR_premature_start_codon_gain_variant | HAD hydrolase, family IIID protein                                             |
| TGME49_236860 | p.Pro1542Ser | missense_variant                               | haloacid dehalogenase family hydrolase domain-containing protein               |
| TGME49_236860 | p.Asn2080His | missense_variant                               | haloacid dehalogenase family hydrolase domain-containing protein               |
| TGME49_217440 | p.Pro92Ser   | missense_variant                               | HCNGP family protein                                                           |
| TGME49_220910 | p.Leu1464Phe | missense_variant                               | HEAT repeat-containing protein                                                 |
| TGME49_220910 | p.Lys1063Asn | missense_variant                               | HEAT repeat-containing protein                                                 |
| TGME49_220910 | p.Gly918Arg  | missense_variant                               | HEAT repeat-containing protein                                                 |
| TGME49_220910 | p.Ile671Thr  | missense_variant                               | HEAT repeat-containing protein                                                 |
| TGME49_220910 | c.-438C>T    | 5_prime_UTR_premature_start_codon_gain_variant | HEAT repeat-containing protein                                                 |
| TGME49_215040 | p.Leu1619Val | missense_variant                               | HEAT repeat-containing protein                                                 |
| TGME49_215040 | c.4055+8T>C  | splice_region_variant                          | HEAT repeat-containing protein                                                 |
| TGME49_215040 | p.Val1140Ile | missense_variant                               | HEAT repeat-containing protein                                                 |
| TGME49_215040 | p.Thr358Ala  | missense_variant                               | HEAT repeat-containing protein                                                 |
| TGME49_295710 | p.Ile3754Asn | missense_variant                               | HECT-domain (ubiquitin-transferase) domain-containing protein                  |
| TGME49_222430 | p.Gly1262Arg | missense_variant                               | HECT-domain (ubiquitin-transferase) domain-containing protein                  |



|               |              |                                                |                                                               |
|---------------|--------------|------------------------------------------------|---------------------------------------------------------------|
| TGME49_280660 | p.Ala7160Thr | missense_variant                               | HECT-domain (ubiquitin-transferase) domain-containing protein |
| TGME49_280660 | p.Arg7158Pro | missense_variant                               | HECT-domain (ubiquitin-transferase) domain-containing protein |
| TGME49_280660 | p.Gly7149Ala | missense_variant                               | HECT-domain (ubiquitin-transferase) domain-containing protein |
| TGME49_280660 | p.Arg6713Lys | missense_variant                               | HECT-domain (ubiquitin-transferase) domain-containing protein |
| TGME49_280660 | p.Lys6712Glu | missense_variant                               | HECT-domain (ubiquitin-transferase) domain-containing protein |
| TGME49_280660 | p.Cys6376Phe | missense_variant                               | HECT-domain (ubiquitin-transferase) domain-containing protein |
| TGME49_280660 | p.Arg6080His | missense_variant                               | HECT-domain (ubiquitin-transferase) domain-containing protein |
| TGME49_280660 | p.Phe5890Val | missense_variant                               | HECT-domain (ubiquitin-transferase) domain-containing protein |
| TGME49_280660 | p.Val5844Ala | missense_variant                               | HECT-domain (ubiquitin-transferase) domain-containing protein |
| TGME49_280660 | p.Ala5729Gly | missense_variant                               | HECT-domain (ubiquitin-transferase) domain-containing protein |
| TGME49_280660 | p.Ala5680Glu | missense_variant                               | HECT-domain (ubiquitin-transferase) domain-containing protein |
| TGME49_280660 | p.Asp4836Glu | missense_variant                               | HECT-domain (ubiquitin-transferase) domain-containing protein |
| TGME49_280660 | p.Gly4807Ala | missense_variant                               | HECT-domain (ubiquitin-transferase) domain-containing protein |
| TGME49_280660 | p.Ser4627Pro | missense_variant                               | HECT-domain (ubiquitin-transferase) domain-containing protein |
| TGME49_280660 | p.Glu4624Ala | missense_variant                               | HECT-domain (ubiquitin-transferase) domain-containing protein |
| TGME49_280660 | p.Gly4494Glu | missense_variant                               | HECT-domain (ubiquitin-transferase) domain-containing protein |
| TGME49_280660 | p.Arg4490Gln | missense_variant                               | HECT-domain (ubiquitin-transferase) domain-containing protein |
| TGME49_280660 | p.Phe3790Val | missense_variant                               | HECT-domain (ubiquitin-transferase) domain-containing protein |
| TGME49_280660 | p.Glu3617Ala | missense_variant                               | HECT-domain (ubiquitin-transferase) domain-containing protein |
| TGME49_280660 | p.Val3421Ala | missense_variant                               | HECT-domain (ubiquitin-transferase) domain-containing protein |
| TGME49_280660 | p.Arg3413Cys | missense_variant                               | HECT-domain (ubiquitin-transferase) domain-containing protein |
| TGME49_280660 | p.Tyr3388Asn | missense_variant                               | HECT-domain (ubiquitin-transferase) domain-containing protein |
| TGME49_280660 | p.Thr3385Arg | missense_variant                               | HECT-domain (ubiquitin-transferase) domain-containing protein |
| TGME49_280660 | p.Pro3356Leu | missense_variant                               | HECT-domain (ubiquitin-transferase) domain-containing protein |
| TGME49_280660 | p.Gln3238Arg | missense_variant                               | HECT-domain (ubiquitin-transferase) domain-containing protein |
| TGME49_280660 | p.Asp3235Glu | missense_variant                               | HECT-domain (ubiquitin-transferase) domain-containing protein |
| TGME49_280660 | p.Arg3162Trp | missense_variant                               | HECT-domain (ubiquitin-transferase) domain-containing protein |
| TGME49_280660 | p.Ala3056Thr | missense_variant                               | HECT-domain (ubiquitin-transferase) domain-containing protein |
| TGME49_280660 | p.Gly3044Arg | missense_variant                               | HECT-domain (ubiquitin-transferase) domain-containing protein |
| TGME49_280660 | p.Pro3023Leu | missense_variant                               | HECT-domain (ubiquitin-transferase) domain-containing protein |
| TGME49_280660 | p.Ala2988Asp | missense_variant                               | HECT-domain (ubiquitin-transferase) domain-containing protein |
| TGME49_280660 | p.Arg2959Ile | missense_variant                               | HECT-domain (ubiquitin-transferase) domain-containing protein |
| TGME49_280660 | p.Asn2791Asp | missense_variant                               | HECT-domain (ubiquitin-transferase) domain-containing protein |
| TGME49_280660 | p.Arg2785Leu | missense_variant                               | HECT-domain (ubiquitin-transferase) domain-containing protein |
| TGME49_280660 | p.Gly2758Arg | missense_variant                               | HECT-domain (ubiquitin-transferase) domain-containing protein |
| TGME49_280660 | p.Gly2745Arg | missense_variant                               | HECT-domain (ubiquitin-transferase) domain-containing protein |
| TGME49_280660 | p.Asn2719Ser | missense_variant                               | HECT-domain (ubiquitin-transferase) domain-containing protein |
| TGME49_280660 | p.Ser2716Asn | missense_variant                               | HECT-domain (ubiquitin-transferase) domain-containing protein |
| TGME49_280660 | p.Ala2682Gly | missense_variant                               | HECT-domain (ubiquitin-transferase) domain-containing protein |
| TGME49_280660 | p.Cys2637Ser | missense_variant                               | HECT-domain (ubiquitin-transferase) domain-containing protein |
| TGME49_280660 | p.Glu2625Lys | missense_variant                               | HECT-domain (ubiquitin-transferase) domain-containing protein |
| TGME49_280660 | p.Ala2463Thr | missense_variant                               | HECT-domain (ubiquitin-transferase) domain-containing protein |
| TGME49_280660 | p.His1757Arg | missense_variant                               | HECT-domain (ubiquitin-transferase) domain-containing protein |
| TGME49_280660 | p.Thr1692Met | missense_variant                               | HECT-domain (ubiquitin-transferase) domain-containing protein |
| TGME49_280660 | p.Val1258Met | missense_variant                               | HECT-domain (ubiquitin-transferase) domain-containing protein |
| TGME49_280660 | p.Leu1134Ile | missense_variant                               | HECT-domain (ubiquitin-transferase) domain-containing protein |
| TGME49_280660 | p.Thr1083Ser | missense_variant                               | HECT-domain (ubiquitin-transferase) domain-containing protein |
| TGME49_280660 | p.Ala1067Gly | missense_variant                               | HECT-domain (ubiquitin-transferase) domain-containing protein |
| TGME49_280660 | p.His1066Arg | missense_variant                               | HECT-domain (ubiquitin-transferase) domain-containing protein |
| TGME49_280660 | p.Arg666Gln  | missense_variant                               | HECT-domain (ubiquitin-transferase) domain-containing protein |
| TGME49_280660 | p.Phe103Leu  | missense_variant                               | HECT-domain (ubiquitin-transferase) domain-containing protein |
| TGME49_278940 | c.-666C>T    | 5_prime_UTR_premature_start_codon_gain_variant | HECT-domain (ubiquitin-transferase) domain-containing protein |
| TGME49_318440 | c.2389+6T>G  | splice_region_variant                          | helicase associated domain (ha2) protein                      |
| TGME49_318440 | p.Ala185Ser  | missense_variant                               | helicase associated domain (ha2) protein                      |
| TGME49_318440 | p.Thr143Ser  | missense_variant                               | helicase associated domain (ha2) protein                      |
| TGME49_318440 | p.Leu34Val   | missense_variant                               | helicase associated domain (ha2) protein                      |
| TGME49_297925 | p.Arg90His   | missense_variant                               | HesB-like domain-containing protein                           |
| TGME49_297925 | p.Ser223Cys  | missense_variant                               | HesB-like domain-containing protein                           |
| TGME49_297925 | p.Leu325Val  | missense_variant                               | HesB-like domain-containing protein                           |
| TGME49_297925 | p.Pro344Leu  | missense_variant                               | HesB-like domain-containing protein                           |
| TGME49_297925 | p.Ser361Ala  | missense_variant                               | HesB-like domain-containing protein                           |
| TGME49_280600 | p.Val1221Phe | missense_variant                               | histidyl-tRNA synthetase (HisRS), putative                    |
| TGME49_252420 | p.Thr30Met   | missense_variant                               | histone arginine methyltransferase PRMT3                      |
| TGME49_252420 | p.Ala156Val  | missense_variant                               | histone arginine methyltransferase PRMT3                      |
| TGME49_252420 | p.Val247Ala  | missense_variant                               | histone arginine methyltransferase PRMT3                      |
| TGME49_252420 | p.Gln296Arg  | missense_variant                               | histone arginine methyltransferase PRMT3                      |
| TGME49_252420 | p.Thr298Pro  | missense_variant                               | histone arginine methyltransferase PRMT3                      |
| TGME49_252420 | p.Leu300Val  | missense_variant                               | histone arginine methyltransferase PRMT3                      |
| TGME49_252420 | p.Leu300*    | stop_gained                                    | histone arginine methyltransferase PRMT3                      |
| TGME49_252420 | p.Glu313Gln  | missense_variant                               | histone arginine methyltransferase PRMT3                      |
| TGME49_252420 | p.Glu682Gly  | missense_variant                               | histone arginine methyltransferase PRMT3                      |
| TGME49_215560 | p.Thr369Ile  | missense_variant                               | histone arginine methyltransferase PRMT5                      |
| TGME49_249620 | p.Leu576Pro  | missense_variant                               | histone deacetylase HDAC2                                     |
| TGME49_254555 | c.-1566G>T   | 5_prime_UTR_premature_start_codon_gain_variant | histone lysine acetyltransferase GCN5-A                       |
| TGME49_254555 | c.-893A>T    | 5_prime_UTR_premature_start_codon_gain_variant | histone lysine acetyltransferase GCN5-A                       |
| TGME49_254555 | p.Val71Gly   | missense_variant                               | histone lysine acetyltransferase GCN5-A                       |
| TGME49_254555 | p.Asp437Tyr  | missense_variant                               | histone lysine acetyltransferase GCN5-A                       |
| TGME49_254555 | p.Asp453Gly  | missense_variant                               | histone lysine acetyltransferase GCN5-A                       |
| TGME49_254555 | p.Val483Ile  | missense_variant                               | histone lysine acetyltransferase GCN5-A                       |
| TGME49_254555 | p.Ala493Ser  | missense_variant                               | histone lysine acetyltransferase GCN5-A                       |
| TGME49_254555 | p.Gly637Ala  | missense_variant                               | histone lysine acetyltransferase GCN5-A                       |
| TGME49_254555 | p.Gly671Arg  | missense_variant                               | histone lysine acetyltransferase GCN5-A                       |
| TGME49_254555 | p.Gly671Glu  | missense_variant                               | histone lysine acetyltransferase GCN5-A                       |
| TGME49_254555 | p.Ala688Thr  | missense_variant                               | histone lysine acetyltransferase GCN5-A                       |
| TGME49_254555 | p.Glu689Lys  | missense_variant                               | histone lysine acetyltransferase GCN5-A                       |

|               |              |                                                |                                                         |
|---------------|--------------|------------------------------------------------|---------------------------------------------------------|
| TGME49_254555 | p.Asn693Lys  | missense_variant                               | histone lysine acetyltransferase GCN5-A                 |
| TGME49_207080 | c.-1068T>G   | 5_prime_UTR_premature_start_codon_gain_variant | histone lysine acetyltransferase MYST-B                 |
| TGME49_224928 | p.Leu248Val  | missense_variant                               | histone lysine demethylase JMJD4                        |
| TGME49_224928 | p.Asp178Ala  | missense_variant                               | histone lysine demethylase JMJD4                        |
| TGME49_224928 | p.Ala166Asp  | missense_variant                               | histone lysine demethylase JMJD4                        |
| TGME49_224928 | p.Glu108Gly  | missense_variant                               | histone lysine demethylase JMJD4                        |
| TGME49_224928 | p.Gln45Glu   | missense_variant                               | histone lysine demethylase JMJD4                        |
| TGME49_224928 | p.Ser7Ala    | missense_variant                               | histone lysine demethylase JMJD4                        |
| TGME49_224928 | p.Lys6Thr    | missense_variant                               | histone lysine demethylase JMJD4                        |
| TGME49_224928 | c.-77C>T     | 5_prime_UTR_premature_start_codon_gain_variant | histone lysine demethylase JMJD4                        |
| TGME49_212110 | p.Ala954Thr  | missense_variant                               | histone lysine demethylase JMJD5                        |
| TGME49_212110 | p.Pro928Leu  | missense_variant                               | histone lysine demethylase JMJD5                        |
| TGME49_212110 | p.Pro905Ser  | missense_variant                               | histone lysine demethylase JMJD5                        |
| TGME49_212110 | p.Thr776Pro  | missense_variant                               | histone lysine demethylase JMJD5                        |
| TGME49_212110 | p.Ser665Arg  | missense_variant                               | histone lysine demethylase JMJD5                        |
| TGME49_212110 | p.Gly657Arg  | missense_variant                               | histone lysine demethylase JMJD5                        |
| TGME49_212110 | p.Lys654Thr  | missense_variant                               | histone lysine demethylase JMJD5                        |
| TGME49_212110 | p.Cys476Phe  | missense_variant                               | histone lysine demethylase JMJD5                        |
| TGME49_212110 | p.Ile472Met  | missense_variant                               | histone lysine demethylase JMJD5                        |
| TGME49_212110 | p.Lys365Gln  | missense_variant                               | histone lysine demethylase JMJD5                        |
| TGME49_212110 | p.Ser231Tyr  | missense_variant                               | histone lysine demethylase JMJD5                        |
| TGME49_212110 | p.Ser226Tyr  | missense_variant                               | histone lysine demethylase JMJD5                        |
| TGME49_212110 | p.Leu97Val   | missense_variant                               | histone lysine demethylase JMJD5                        |
| TGME49_212110 | c.-294A>G    | 5_prime_UTR_premature_start_codon_gain_variant | histone lysine demethylase JMJD5                        |
| TGME49_211730 | p.Pro106Ser  | missense_variant                               | histone lysine methyltransferase SET8                   |
| TGME49_211730 | p.Glu228Asp  | missense_variant                               | histone lysine methyltransferase SET8                   |
| TGME49_211730 | p.Ser234Asn  | missense_variant                               | histone lysine methyltransferase SET8                   |
| TGME49_211730 | p.Asp274Glu  | missense_variant                               | histone lysine methyltransferase SET8                   |
| TGME49_211730 | p.Asn761Thr  | missense_variant                               | histone lysine methyltransferase SET8                   |
| TGME49_211730 | p.Gly1421Arg | missense_variant                               | histone lysine methyltransferase SET8                   |
| TGME49_211730 | p.Gly1470Arg | missense_variant                               | histone lysine methyltransferase SET8                   |
| TGME49_319662 | c.-217G>C    | 5_prime_UTR_premature_start_codon_gain_variant | histone lysine methyltransferase, SET, putative         |
| TGME49_319662 | p.Asn12Thr   | missense_variant                               | histone lysine methyltransferase, SET, putative         |
| TGME49_319662 | p.Ser94Leu   | missense_variant                               | histone lysine methyltransferase, SET, putative         |
| TGME49_319662 | p.Arg126Gly  | missense_variant                               | histone lysine methyltransferase, SET, putative         |
| TGME49_319662 | p.Gln274Leu  | missense_variant                               | histone lysine methyltransferase, SET, putative         |
| TGME49_319662 | p.Ser356Pro  | missense_variant                               | histone lysine methyltransferase, SET, putative         |
| TGME49_319662 | p.Glu368Gly  | missense_variant                               | histone lysine methyltransferase, SET, putative         |
| TGME49_319662 | p.Pro380Leu  | missense_variant                               | histone lysine methyltransferase, SET, putative         |
| TGME49_319662 | p.Ser449Pro  | missense_variant                               | histone lysine methyltransferase, SET, putative         |
| TGME49_319662 | p.Thr474Ala  | missense_variant                               | histone lysine methyltransferase, SET, putative         |
| TGME49_319662 | p.Glu619Gly  | missense_variant                               | histone lysine methyltransferase, SET, putative         |
| TGME49_246910 | p.Glu448Gln  | missense_variant                               | histone lysine methyltransferase, SET, putative         |
| TGME49_275420 | p.Ser2813Phe | missense_variant                               | histone lysine-specific demethylase LSD1/BHC110/KDMA1A  |
| TGME49_275420 | p.Arg1832His | missense_variant                               | histone lysine-specific demethylase LSD1/BHC110/KDMA1A  |
| TGME49_275420 | p.Asp1337His | missense_variant                               | histone lysine-specific demethylase LSD1/BHC110/KDMA1A  |
| TGME49_275420 | p.Lys1335Glu | missense_variant                               | histone lysine-specific demethylase LSD1/BHC110/KDMA1A  |
| TGME49_275420 | p.Ser637Ile  | missense_variant                               | histone lysine-specific demethylase LSD1/BHC110/KDMA1A  |
| TGME49_275420 | p.Asp535Gly  | missense_variant                               | histone lysine-specific demethylase LSD1/BHC110/KDMA1A  |
| TGME49_275420 | p.Val338Ala  | missense_variant                               | histone lysine-specific demethylase LSD1/BHC110/KDMA1A  |
| TGME49_275420 | p.Pro261Leu  | missense_variant                               | histone lysine-specific demethylase LSD1/BHC110/KDMA1A  |
| TGME49_275420 | p.Ser213Pro  | missense_variant                               | histone lysine-specific demethylase LSD1/BHC110/KDMA1A  |
| TGME49_275420 | p.Leu91Ile   | missense_variant                               | histone lysine-specific demethylase LSD1/BHC110/KDMA1A  |
| TGME49_252400 | p.Thr738Ile  | missense_variant                               | HIT zinc finger protein                                 |
| TGME49_252400 | p.Ala705Val  | missense_variant                               | HIT zinc finger protein                                 |
| TGME49_252400 | p.Ala542Pro  | missense_variant                               | HIT zinc finger protein                                 |
| TGME49_252400 | p.Val312Ile  | missense_variant                               | HIT zinc finger protein                                 |
| TGME49_252400 | p.Ala15Val   | missense_variant                               | HIT zinc finger protein                                 |
| TGME49_252400 | p.Ala15Pro   | missense_variant                               | HIT zinc finger protein                                 |
| TGME49_217500 | c.361-3T>C   | splice_region_variant                          | HMG (high mobility group) box domain-containing protein |
| TGME49_253070 | p.Arg29His   | missense_variant                               | hydrolase, TatD family protein                          |
| TGME49_253070 | p.Pro168Ala  | missense_variant                               | hydrolase, TatD family protein                          |
| TGME49_253070 | p.Val185Leu  | missense_variant                               | hydrolase, TatD family protein                          |
| TGME49_253070 | p.Val185Gly  | missense_variant                               | hydrolase, TatD family protein                          |
| TGME49_253070 | p.Arg187Gln  | missense_variant                               | hydrolase, TatD family protein                          |
| TGME49_253070 | p.Val269Phe  | missense_variant                               | hydrolase, TatD family protein                          |
| TGME49_253070 | c.1598-7T>C  | splice_region_variant                          | hydrolase, TatD family protein                          |
| TGME49_253070 | p.Glu554Gly  | missense_variant                               | hydrolase, TatD family protein                          |
| TGME49_329000 | c.2038+1G>T  | splice_donor_variant                           | hypothetical protein                                    |
| TGME49_329000 | p.Thr562Ala  | missense_variant                               | hypothetical protein                                    |
| TGME49_329000 | p.Gly561Val  | missense_variant                               | hypothetical protein                                    |
| TGME49_329000 | p.Asp560Gly  | missense_variant                               | hypothetical protein                                    |
| TGME49_329000 | c.1483+7T>G  | splice_region_variant                          | hypothetical protein                                    |
| TGME49_217961 | p.Ala493Pro  | missense_variant                               | hypothetical protein                                    |
| TGME49_208400 | p.Ala1896Pro | missense_variant                               | hypothetical protein                                    |
| TGME49_208400 | p.Gly1895Ala | missense_variant                               | hypothetical protein                                    |
| TGME49_220880 | c.-856C>T    | 5_prime_UTR_premature_start_codon_gain_variant | hypothetical protein                                    |
| TGME49_220900 | p.Glu56Asp   | missense_variant                               | hypothetical protein                                    |
| TGME49_220920 | c.-359A>G    | 5_prime_UTR_premature_start_codon_gain_variant | hypothetical protein                                    |
| TGME49_220920 | p.Gly590Ala  | missense_variant                               | hypothetical protein                                    |
| TGME49_220920 | p.Thr949Ala  | missense_variant                               | hypothetical protein                                    |
| TGME49_220920 | p.Ile1064Val | missense_variant                               | hypothetical protein                                    |
| TGME49_221180 | p.Ala315Thr  | missense_variant                               | hypothetical protein                                    |
| TGME49_221180 | p.Pro239Ser  | missense_variant                               | hypothetical protein                                    |
| TGME49_221180 | p.Val111Gly  | missense_variant                               | hypothetical protein                                    |

|               |              |                                                |                      |
|---------------|--------------|------------------------------------------------|----------------------|
| TGME49_221220 | c.1561+4A>G  | splice_region_variant                          | hypothetical protein |
| TGME49_221220 | p.Ser969Pro  | missense_variant                               | hypothetical protein |
| TGME49_221220 | p.Leu1012His | missense_variant                               | hypothetical protein |
| TGME49_221220 | p.Ala1416Ser | missense_variant                               | hypothetical protein |
| TGME49_221220 | p.Val1653Ile | missense_variant                               | hypothetical protein |
| TGME49_221220 | p.Asp1758His | missense_variant                               | hypothetical protein |
| TGME49_221230 | p.Thr87Ala   | missense_variant                               | hypothetical protein |
| TGME49_221240 | p.Thr86Ile   | missense_variant                               | hypothetical protein |
| TGME49_221250 | c.1094+7G>A  | splice_region_variant                          | hypothetical protein |
| TGME49_221250 | p.Thr471Ser  | missense_variant                               | hypothetical protein |
| TGME49_221250 | p.Val516Ile  | missense_variant                               | hypothetical protein |
| TGME49_221250 | p.His808Asn  | missense_variant                               | hypothetical protein |
| TGME49_221250 | p.Ala818Thr  | missense_variant                               | hypothetical protein |
| TGME49_221265 | p.Gly399Glu  | missense_variant                               | hypothetical protein |
| TGME49_221265 | p.Leu140Ile  | missense_variant                               | hypothetical protein |
| TGME49_221265 | p.Phe97Leu   | missense_variant                               | hypothetical protein |
| TGME49_221275 | p.Gly139Arg  | missense_variant                               | hypothetical protein |
| TGME49_221275 | p.Arg90Leu   | missense_variant                               | hypothetical protein |
| TGME49_221280 | p.Pro113Ser  | missense_variant                               | hypothetical protein |
| TGME49_221280 | p.Ser164Ala  | missense_variant                               | hypothetical protein |
| TGME49_221280 | p.Thr222Arg  | missense_variant                               | hypothetical protein |
| TGME49_221280 | p.Arg262Lys  | missense_variant                               | hypothetical protein |
| TGME49_221280 | p.Lys270Asn  | missense_variant                               | hypothetical protein |
| TGME49_221280 | p.His355Asp  | missense_variant                               | hypothetical protein |
| TGME49_221280 | p.Gly553Val  | missense_variant                               | hypothetical protein |
| TGME49_221280 | p.Gly595Arg  | missense_variant                               | hypothetical protein |
| TGME49_221280 | p.Ile798Thr  | missense_variant                               | hypothetical protein |
| TGME49_221280 | p.Pro848Leu  | missense_variant                               | hypothetical protein |
| TGME49_221280 | p.Arg1322Pro | missense_variant                               | hypothetical protein |
| TGME49_221280 | p.Leu1409Val | missense_variant                               | hypothetical protein |
| TGME49_221280 | p.Arg1547Ser | missense_variant                               | hypothetical protein |
| TGME49_221280 | p.Ala1556Val | missense_variant                               | hypothetical protein |
| TGME49_221280 | p.Gly1582Arg | missense_variant                               | hypothetical protein |
| TGME49_221280 | p.Tyr1607Cys | missense_variant                               | hypothetical protein |
| TGME49_221280 | p.Thr1646Arg | missense_variant                               | hypothetical protein |
| TGME49_221280 | p.Gly2240Asp | missense_variant                               | hypothetical protein |
| TGME49_221280 | p.Asp2875Asn | missense_variant                               | hypothetical protein |
| TGME49_221280 | p.Ala2918Pro | missense_variant                               | hypothetical protein |
| TGME49_221280 | p.Glu2981Lys | missense_variant                               | hypothetical protein |
| TGME49_221280 | p.Glu3118Lys | missense_variant                               | hypothetical protein |
| TGME49_221280 | p.Pro3185Gln | missense_variant                               | hypothetical protein |
| TGME49_221280 | p.Ser3870Gly | missense_variant                               | hypothetical protein |
| TGME49_221360 | p.Ile418Val  | missense_variant                               | hypothetical protein |
| TGME49_221360 | c.-82G>C     | 5_prime_UTR_premature_start_codon_gain_variant | hypothetical protein |
| TGME49_221360 | c.-431C>T    | 5_prime_UTR_premature_start_codon_gain_variant | hypothetical protein |
| TGME49_221360 | c.-639C>T    | 5_prime_UTR_premature_start_codon_gain_variant | hypothetical protein |
| TGME49_221370 | c.-974C>T    | 5_prime_UTR_premature_start_codon_gain_variant | hypothetical protein |
| TGME49_221370 | c.-879C>T    | 5_prime_UTR_premature_start_codon_gain_variant | hypothetical protein |
| TGME49_221370 | p.Pro628Leu  | missense_variant                               | hypothetical protein |
| TGME49_221370 | p.Thr683Pro  | missense_variant                               | hypothetical protein |
| TGME49_221370 | p.Arg1097Gly | missense_variant                               | hypothetical protein |
| TGME49_221370 | p.Val1142Ala | missense_variant                               | hypothetical protein |
| TGME49_221370 | p.Arg1199Cys | missense_variant                               | hypothetical protein |
| TGME49_221400 | p.Leu1596His | missense_variant                               | hypothetical protein |
| TGME49_221400 | p.Pro1583Ser | missense_variant                               | hypothetical protein |
| TGME49_221400 | p.Thr836Pro  | missense_variant                               | hypothetical protein |
| TGME49_221400 | p.Phe824Leu  | missense_variant                               | hypothetical protein |
| TGME49_221400 | p.Glu501Asp  | missense_variant                               | hypothetical protein |
| TGME49_221400 | p.Val16Ala   | missense_variant                               | hypothetical protein |
| TGME49_221430 | p.Ser177Ala  | missense_variant                               | hypothetical protein |
| TGME49_221430 | p.Asp370Glu  | missense_variant                               | hypothetical protein |
| TGME49_221430 | p.Ile602Thr  | missense_variant                               | hypothetical protein |
| TGME49_221430 | p.Arg608Leu  | missense_variant                               | hypothetical protein |
| TGME49_221455 | p.Gln219Lys  | missense_variant                               | hypothetical protein |
| TGME49_221455 | p.Leu233Pro  | missense_variant                               | hypothetical protein |
| TGME49_221480 | p.Met70Ile   | missense_variant                               | hypothetical protein |
| TGME49_221480 | c.-785C>G    | 5_prime_UTR_premature_start_codon_gain_variant | hypothetical protein |
| TGME49_221540 | c.3083-4G>T  | splice_region_variant                          | hypothetical protein |
| TGME49_221540 | p.Phe934Leu  | missense_variant                               | hypothetical protein |
| TGME49_221540 | p.Gln765Lys  | missense_variant                               | hypothetical protein |
| TGME49_221540 | p.Pro564Ser  | missense_variant                               | hypothetical protein |
| TGME49_221540 | c.-338G>T    | 5_prime_UTR_premature_start_codon_gain_variant | hypothetical protein |
| TGME49_221560 | p.Asn106Thr  | missense_variant                               | hypothetical protein |
| TGME49_221585 | p.Ser89Leu   | missense_variant                               | hypothetical protein |
| TGME49_221585 | p.Phe80Ser   | missense_variant                               | hypothetical protein |
| TGME49_221585 | p.Pro23Leu   | missense_variant                               | hypothetical protein |
| TGME49_221600 | p.Gln852His  | missense_variant                               | hypothetical protein |
| TGME49_221600 | p.Gly525Glu  | missense_variant                               | hypothetical protein |
| TGME49_221600 | p.Gln501His  | missense_variant                               | hypothetical protein |
| TGME49_221600 | p.Gln501Leu  | missense_variant                               | hypothetical protein |
| TGME49_221600 | p.Gln225Arg  | missense_variant                               | hypothetical protein |
| TGME49_221600 | p.Pro222Gln  | missense_variant                               | hypothetical protein |
| TGME49_221600 | p.Gly61Arg   | missense_variant                               | hypothetical protein |
| TGME49_221600 | p.Ala51Ser   | missense_variant                               | hypothetical protein |
| TGME49_221600 | c.-395T>C    | 5_prime_UTR_premature_start_codon_gain_variant | hypothetical protein |

|               |              |                                                |                      |
|---------------|--------------|------------------------------------------------|----------------------|
| TGME49_221630 | p.Gly1140Arg | missense_variant                               | hypothetical protein |
| TGME49_221630 | p.Asn1096Tyr | missense_variant                               | hypothetical protein |
| TGME49_221630 | p.Asn1021Ser | missense_variant                               | hypothetical protein |
| TGME49_221630 | p.Asp491Ala  | missense_variant                               | hypothetical protein |
| TGME49_221630 | p.Glu386Asp  | missense_variant                               | hypothetical protein |
| TGME49_221630 | c.-1833A>T   | 5_prime_UTR_premature_start_codon_gain_variant | hypothetical protein |
| TGME49_221640 | p.Arg425Trp  | missense_variant                               | hypothetical protein |
| TGME49_221640 | p.Ala674Ser  | missense_variant                               | hypothetical protein |
| TGME49_221675 | p.Ala1119Val | missense_variant                               | hypothetical protein |
| TGME49_221675 | p.His143Tyr  | missense_variant                               | hypothetical protein |
| TGME49_221685 | c.-1416C>G   | 5_prime_UTR_premature_start_codon_gain_variant | hypothetical protein |
| TGME49_221685 | p.His127Tyr  | missense_variant                               | hypothetical protein |
| TGME49_221690 | p.Asp90Gly   | missense_variant                               | hypothetical protein |
| TGME49_221720 | p.Pro3083Leu | missense_variant                               | hypothetical protein |
| TGME49_221720 | p.Pro2833Ala | missense_variant                               | hypothetical protein |
| TGME49_221720 | p.Val2609Glu | missense_variant                               | hypothetical protein |
| TGME49_221720 | p.Leu2599Phe | missense_variant                               | hypothetical protein |
| TGME49_221720 | p.Leu2578Phe | missense_variant                               | hypothetical protein |
| TGME49_221720 | p.Leu2171Ser | missense_variant                               | hypothetical protein |
| TGME49_221720 | p.Ala1569Gly | missense_variant                               | hypothetical protein |
| TGME49_221720 | p.Asn1408Ser | missense_variant                               | hypothetical protein |
| TGME49_221720 | p.Gly1259Ala | missense_variant                               | hypothetical protein |
| TGME49_221720 | p.Ser1087Leu | missense_variant                               | hypothetical protein |
| TGME49_221720 | p.Pro1029Ser | missense_variant                               | hypothetical protein |
| TGME49_221720 | p.Arg220*    | stop_gained                                    | hypothetical protein |
| TGME49_221840 | c.-179A>T    | 5_prime_UTR_premature_start_codon_gain_variant | hypothetical protein |
| TGME49_221870 | p.Val42Ile   | missense_variant                               | hypothetical protein |
| TGME49_221870 | p.Ala65Asp   | missense_variant                               | hypothetical protein |
| TGME49_221870 | p.Ala103Thr  | missense_variant                               | hypothetical protein |
| TGME49_221870 | p.Arg181Pro  | missense_variant                               | hypothetical protein |
| TGME49_221870 | p.Arg387Ser  | missense_variant                               | hypothetical protein |
| TGME49_221870 | p.Ala1057Thr | missense_variant                               | hypothetical protein |
| TGME49_221880 | p.Ser584Pro  | missense_variant                               | hypothetical protein |
| TGME49_221880 | p.Glu328Asp  | missense_variant                               | hypothetical protein |
| TGME49_221880 | p.Arg272Lys  | missense_variant                               | hypothetical protein |
| TGME49_221880 | p.Glu238Gly  | missense_variant                               | hypothetical protein |
| TGME49_221880 | c.166-3C>T   | splice_region_variant                          | hypothetical protein |
| TGME49_221880 | p.Val30Ala   | missense_variant                               | hypothetical protein |
| TGME49_221880 | c.-257T>C    | 5_prime_UTR_premature_start_codon_gain_variant | hypothetical protein |
| TGME49_221895 | p.His186Gln  | missense_variant                               | hypothetical protein |
| TGME49_221895 | p.Pro44Ser   | missense_variant                               | hypothetical protein |
| TGME49_221818 | p.Tyr225His  | missense_variant                               | hypothetical protein |
| TGME49_221990 | p.Leu376Val  | missense_variant                               | hypothetical protein |
| TGME49_221990 | p.Arg96Met   | missense_variant                               | hypothetical protein |
| TGME49_221990 | p.Thr92Met   | missense_variant                               | hypothetical protein |
| TGME49_221990 | p.Ala38Gly   | missense_variant                               | hypothetical protein |
| TGME49_222030 | p.Ala109Ser  | missense_variant                               | hypothetical protein |
| TGME49_222030 | p.Leu233Phe  | missense_variant                               | hypothetical protein |
| TGME49_222030 | p.Gly248Ser  | missense_variant                               | hypothetical protein |
| TGME49_222030 | p.Ser267Pro  | missense_variant                               | hypothetical protein |
| TGME49_222030 | p.Ala833Thr  | missense_variant                               | hypothetical protein |
| TGME49_222030 | p.Cys1208Tyr | missense_variant                               | hypothetical protein |
| TGME49_222050 | p.Ser1151Asn | missense_variant                               | hypothetical protein |
| TGME49_222050 | p.Tyr970Cys  | missense_variant                               | hypothetical protein |
| TGME49_222050 | p.Thr853Met  | missense_variant                               | hypothetical protein |
| TGME49_222050 | p.Ala847Thr  | missense_variant                               | hypothetical protein |
| TGME49_222050 | p.Gly734Arg  | missense_variant                               | hypothetical protein |
| TGME49_222050 | p.Gly352Arg  | missense_variant                               | hypothetical protein |
| TGME49_222050 | p.Pro52Leu   | missense_variant                               | hypothetical protein |
| TGME49_222050 | p.Pro52Ser   | missense_variant                               | hypothetical protein |
| TGME49_222060 | p.Pro854Arg  | missense_variant                               | hypothetical protein |
| TGME49_222060 | p.Ser203Ala  | missense_variant                               | hypothetical protein |
| TGME49_222060 | p.Phe116Val  | missense_variant                               | hypothetical protein |
| TGME49_222060 | p.Pro81Ser   | missense_variant                               | hypothetical protein |
| TGME49_222080 | c.390-3C>T   | splice_region_variant                          | hypothetical protein |
| TGME49_222120 | p.Ala956Val  | missense_variant                               | hypothetical protein |
| TGME49_222120 | p.Ala791Thr  | missense_variant                               | hypothetical protein |
| TGME49_222120 | p.Arg629Cys  | missense_variant                               | hypothetical protein |
| TGME49_222120 | p.Ser473Pro  | missense_variant                               | hypothetical protein |
| TGME49_222120 | p.Ala391Thr  | missense_variant                               | hypothetical protein |
| TGME49_222120 | p.Gly150Ser  | missense_variant                               | hypothetical protein |
| TGME49_222130 | c.-307T>C    | 5_prime_UTR_premature_start_codon_gain_variant | hypothetical protein |
| TGME49_222150 | p.Ile33Thr   | missense_variant                               | hypothetical protein |
| TGME49_222155 | c.-41G>A     | 5_prime_UTR_premature_start_codon_gain_variant | hypothetical protein |
| TGME49_222155 | c.-21C>T     | 5_prime_UTR_premature_start_codon_gain_variant | hypothetical protein |
| TGME49_222155 | p.Arg78His   | missense_variant                               | hypothetical protein |
| TGME49_222155 | p.Lys201Glu  | missense_variant                               | hypothetical protein |
| TGME49_222180 | p.Glu83Asp   | missense_variant                               | hypothetical protein |
| TGME49_222180 | p.Val58Ile   | missense_variant                               | hypothetical protein |
| TGME49_222192 | c.-344A>T    | 5_prime_UTR_premature_start_codon_gain_variant | hypothetical protein |
| TGME49_222192 | c.547+8A>G   | splice_region_variant                          | hypothetical protein |
| TGME49_222230 | p.Gly1252Asp | missense_variant                               | hypothetical protein |
| TGME49_222230 | p.Gln1203Glu | missense_variant                               | hypothetical protein |
| TGME49_222230 | p.Gly435Glu  | missense_variant                               | hypothetical protein |
| TGME49_222230 | p.Asn402Lys  | missense_variant                               | hypothetical protein |

|               |              |                                                |                      |
|---------------|--------------|------------------------------------------------|----------------------|
| TGME49_222230 | p.Arg43Lys   | missense_variant                               | hypothetical protein |
| TGME49_222230 | p.Met21Ile   | missense_variant                               | hypothetical protein |
| TGME49_222240 | p.Pro406Ser  | missense_variant                               | hypothetical protein |
| TGME49_222240 | p.Ser633Pro  | missense_variant                               | hypothetical protein |
| TGME49_222240 | p.Met663Arg  | missense_variant                               | hypothetical protein |
| TGME49_222240 | p.Ala877Val  | missense_variant                               | hypothetical protein |
| TGME49_222245 | c.-520G>A    | 5_prime_UTR_premature_start_codon_gain_variant | hypothetical protein |
| TGME49_222245 | p.Glu99Lys   | missense_variant                               | hypothetical protein |
| TGME49_222250 | p.Glu1327Asp | missense_variant                               | hypothetical protein |
| TGME49_222250 | p.Arg1309Lys | missense_variant                               | hypothetical protein |
| TGME49_222250 | p.Val1148Ala | missense_variant                               | hypothetical protein |
| TGME49_222250 | p.Ser962Tyr  | missense_variant                               | hypothetical protein |
| TGME49_222250 | p.Glu932Gly  | missense_variant                               | hypothetical protein |
| TGME49_222250 | p.Thr846Ala  | missense_variant                               | hypothetical protein |
| TGME49_222250 | p.Ile845Val  | missense_variant                               | hypothetical protein |
| TGME49_222250 | p.Ala835Pro  | missense_variant                               | hypothetical protein |
| TGME49_222250 | p.Thr746Ala  | missense_variant                               | hypothetical protein |
| TGME49_222250 | p.Ile271Val  | missense_variant                               | hypothetical protein |
| TGME49_222250 | p.Ala52Gly   | missense_variant                               | hypothetical protein |
| TGME49_222270 | p.Phe6Ser    | missense_variant                               | hypothetical protein |
| TGME49_222280 | p.Ala64Val   | missense_variant                               | hypothetical protein |
| TGME49_222300 | c.2964-5G>C  | splice_region_variant                          | hypothetical protein |
| TGME49_222300 | p.Leu884Ile  | missense_variant                               | hypothetical protein |
| TGME49_222300 | p.Met564Thr  | missense_variant                               | hypothetical protein |
| TGME49_222300 | p.Ser561Pro  | missense_variant                               | hypothetical protein |
| TGME49_222300 | p.Ser446Thr  | missense_variant                               | hypothetical protein |
| TGME49_222300 | p.Ser446Gly  | missense_variant                               | hypothetical protein |
| TGME49_222300 | p.Ile422Thr  | missense_variant                               | hypothetical protein |
| TGME49_222300 | p.Gly298Asp  | missense_variant                               | hypothetical protein |
| TGME49_222300 | p.His196Arg  | missense_variant                               | hypothetical protein |
| TGME49_222300 | p.Ala122Val  | missense_variant                               | hypothetical protein |
| TGME49_222305 | c.92+4G>A    | splice_region_variant                          | hypothetical protein |
| TGME49_222310 | p.Asn446Ser  | missense_variant                               | hypothetical protein |
| TGME49_222330 | p.Arg1966Lys | missense_variant                               | hypothetical protein |
| TGME49_222330 | p.Ser1880Pro | missense_variant                               | hypothetical protein |
| TGME49_222330 | p.His1688Arg | missense_variant                               | hypothetical protein |
| TGME49_222330 | p.Ser1460Phe | missense_variant                               | hypothetical protein |
| TGME49_222330 | p.Trp1305Cys | missense_variant                               | hypothetical protein |
| TGME49_222330 | p.Ser1046Asn | missense_variant                               | hypothetical protein |
| TGME49_222330 | p.Ser934Asn  | missense_variant                               | hypothetical protein |
| TGME49_222330 | p.Ile252Val  | missense_variant                               | hypothetical protein |
| TGME49_222330 | p.Leu112Phe  | missense_variant                               | hypothetical protein |
| TGME49_222360 | c.-399T>C    | 5_prime_UTR_premature_start_codon_gain_variant | hypothetical protein |
| TGME49_222360 | p.Ser647Thr  | missense_variant                               | hypothetical protein |
| TGME49_222390 | p.Phe257Tyr  | missense_variant                               | hypothetical protein |
| TGME49_222390 | p.Ser82Thr   | missense_variant                               | hypothetical protein |
| TGME49_222390 | c.-142C>T    | 5_prime_UTR_premature_start_codon_gain_variant | hypothetical protein |
| TGME49_222400 | p.Asp9Glu    | missense_variant                               | hypothetical protein |
| TGME49_222420 | p.Ser156Pro  | missense_variant                               | hypothetical protein |
| TGME49_222420 | p.Val314Met  | missense_variant                               | hypothetical protein |
| TGME49_222420 | p.Phe460Val  | missense_variant                               | hypothetical protein |
| TGME49_222440 | p.Arg197Leu  | missense_variant                               | hypothetical protein |
| TGME49_222440 | p.Val145Phe  | missense_variant                               | hypothetical protein |
| TGME49_222700 | p.Val128Ile  | missense_variant                               | hypothetical protein |
| TGME49_222700 | p.His357Arg  | missense_variant                               | hypothetical protein |
| TGME49_222870 | c.483+4C>T   | splice_region_variant                          | hypothetical protein |
| TGME49_222880 | p.Asn29Asp   | missense_variant                               | hypothetical protein |
| TGME49_222880 | p.Leu178Val  | missense_variant                               | hypothetical protein |
| TGME49_222880 | p.Glu344Lys  | missense_variant                               | hypothetical protein |
| TGME49_222880 | c.1252-7C>A  | splice_region_variant                          | hypothetical protein |
| TGME49_222930 | p.Pro80Leu   | missense_variant                               | hypothetical protein |
| TGME49_222935 | c.-27G>T     | 5_prime_UTR_premature_start_codon_gain_variant | hypothetical protein |
| TGME49_222940 | p.Leu18Arg   | missense_variant                               | hypothetical protein |
| TGME49_222975 | p.Gly350Arg  | missense_variant                               | hypothetical protein |
| TGME49_223070 | p.Thr161Ser  | missense_variant                               | hypothetical protein |
| TGME49_223080 | p.Ile2787Val | missense_variant                               | hypothetical protein |
| TGME49_223080 | p.Thr2534Ser | missense_variant                               | hypothetical protein |
| TGME49_223080 | p.Gly2380Val | missense_variant                               | hypothetical protein |
| TGME49_223080 | p.Gln1553Leu | missense_variant                               | hypothetical protein |
| TGME49_223080 | p.Ser984Asn  | missense_variant                               | hypothetical protein |
| TGME49_223080 | p.Arg444Gly  | missense_variant                               | hypothetical protein |
| TGME49_223080 | p.His181Tyr  | missense_variant                               | hypothetical protein |
| TGME49_223080 | p.Ala140Pro  | missense_variant                               | hypothetical protein |
| TGME49_223080 | p.Gly67Arg   | missense_variant                               | hypothetical protein |
| TGME49_223080 | c.-3585A>G   | 5_prime_UTR_premature_start_codon_gain_variant | hypothetical protein |
| TGME49_223095 | p.Thr705Ile  | missense_variant                               | hypothetical protein |
| TGME49_223095 | p.Gly633Arg  | missense_variant                               | hypothetical protein |
| TGME49_223095 | p.Ser605Pro  | missense_variant                               | hypothetical protein |
| TGME49_223095 | p.Asp186Asn  | missense_variant                               | hypothetical protein |
| TGME49_223095 | p.Glu120Ala  | missense_variant                               | hypothetical protein |
| TGME49_223095 | p.Glu120*    | stop_gained                                    | hypothetical protein |
| TGME49_223130 | p.Gly279Asp  | missense_variant                               | hypothetical protein |
| TGME49_296950 | c.211-6T>C   | splice_region_variant                          | hypothetical protein |
| TGME49_297090 | p.Val19Ala   | missense_variant                               | hypothetical protein |
| TGME49_297100 | p.Thr46Met   | missense_variant                               | hypothetical protein |

|               |              |                                                |                      |
|---------------|--------------|------------------------------------------------|----------------------|
| TGME49_297120 | p.Tyr8His    | missense_variant                               | hypothetical protein |
| TGME49_297120 | p.Leu62*     | stop_gained                                    | hypothetical protein |
| TGME49_297130 | c.-1488C>T   | 5_prime_UTR_premature_start_codon_gain_variant | hypothetical protein |
| TGME49_297160 | c.842+8A>C   | splice_region_variant                          | hypothetical protein |
| TGME49_297180 | p.Glu773Ala  | missense_variant                               | hypothetical protein |
| TGME49_297180 | p.Asn621Ser  | missense_variant                               | hypothetical protein |
| TGME49_297190 | p.Glu9Lys    | missense_variant                               | hypothetical protein |
| TGME49_297210 | p.Gly1062Asp | missense_variant                               | hypothetical protein |
| TGME49_297210 | p.Ser1461Cys | missense_variant                               | hypothetical protein |
| TGME49_297210 | p.Arg1487Pro | missense_variant                               | hypothetical protein |
| TGME49_297210 | p.Ser2089Thr | missense_variant                               | hypothetical protein |
| TGME49_297210 | p.Glu2968Gly | missense_variant                               | hypothetical protein |
| TGME49_297210 | p.Ser3072Asn | missense_variant                               | hypothetical protein |
| TGME49_297210 | p.Ala3722Ser | missense_variant                               | hypothetical protein |
| TGME49_297210 | p.Arg3895Lys | missense_variant                               | hypothetical protein |
| TGME49_297270 | p.Ser71Ala   | missense_variant                               | hypothetical protein |
| TGME49_297270 | c.1098+8C>T  | splice_region_variant                          | hypothetical protein |
| TGME49_297280 | p.Thr62Met   | missense_variant                               | hypothetical protein |
| TGME49_297280 | p.Arg29His   | missense_variant                               | hypothetical protein |
| TGME49_297280 | c.-2300C>T   | 5_prime_UTR_premature_start_codon_gain_variant | hypothetical protein |
| TGME49_297290 | p.Lys234Asn  | missense_variant                               | hypothetical protein |
| TGME49_297310 | c.-867A>G    | 5_prime_UTR_premature_start_codon_gain_variant | hypothetical protein |
| TGME49_297310 | p.Leu179Arg  | missense_variant                               | hypothetical protein |
| TGME49_297310 | p.Ala271Ser  | missense_variant                               | hypothetical protein |
| TGME49_297320 | p.Asp810Ala  | missense_variant                               | hypothetical protein |
| TGME49_297320 | c.-319C>T    | 5_prime_UTR_premature_start_codon_gain_variant | hypothetical protein |
| TGME49_297320 | c.-337G>A    | 5_prime_UTR_premature_start_codon_gain_variant | hypothetical protein |
| TGME49_297320 | c.-668C>G    | 5_prime_UTR_premature_start_codon_gain_variant | hypothetical protein |
| TGME49_297330 | p.Gln3158*   | stop_gained                                    | hypothetical protein |
| TGME49_297330 | p.Gly2765Glu | missense_variant                               | hypothetical protein |
| TGME49_297330 | p.Ala2533Ser | missense_variant                               | hypothetical protein |
| TGME49_297330 | p.Cys2185Arg | missense_variant                               | hypothetical protein |
| TGME49_297330 | p.Gly2086Arg | missense_variant                               | hypothetical protein |
| TGME49_297330 | p.Ser2052Asn | missense_variant                               | hypothetical protein |
| TGME49_297330 | p.Glu1958Lys | missense_variant                               | hypothetical protein |
| TGME49_297330 | p.Glu1833Asp | missense_variant                               | hypothetical protein |
| TGME49_297330 | p.His1715Arg | missense_variant                               | hypothetical protein |
| TGME49_297330 | p.Gly1013Arg | missense_variant                               | hypothetical protein |
| TGME49_297330 | p.Asn772Thr  | missense_variant                               | hypothetical protein |
| TGME49_297330 | p.Arg594Gly  | missense_variant                               | hypothetical protein |
| TGME49_297330 | p.Leu519Val  | missense_variant                               | hypothetical protein |
| TGME49_297330 | p.Leu338Arg  | missense_variant                               | hypothetical protein |
| TGME49_297340 | p.Arg8Cys    | missense_variant                               | hypothetical protein |
| TGME49_297340 | p.Ile112Leu  | missense_variant                               | hypothetical protein |
| TGME49_297340 | p.Ser267Leu  | missense_variant                               | hypothetical protein |
| TGME49_297340 | p.Thr606Ser  | missense_variant                               | hypothetical protein |
| TGME49_297340 | p.Ala644Thr  | missense_variant                               | hypothetical protein |
| TGME49_297340 | p.Ala777Thr  | missense_variant                               | hypothetical protein |
| TGME49_297340 | p.Arg1052Cys | missense_variant                               | hypothetical protein |
| TGME49_297360 | p.Thr962Ala  | missense_variant                               | hypothetical protein |
| TGME49_297380 | p.Gly338Arg  | missense_variant                               | hypothetical protein |
| TGME49_297380 | p.Gln246His  | missense_variant                               | hypothetical protein |
| TGME49_297380 | p.Arg25Gln   | missense_variant                               | hypothetical protein |
| TGME49_297390 | p.Arg244Lys  | missense_variant                               | hypothetical protein |
| TGME49_297430 | p.Ser12Gly   | missense_variant                               | hypothetical protein |
| TGME49_297440 | p.Ile40Thr   | missense_variant                               | hypothetical protein |
| TGME49_297488 | p.Met4Ile    | missense_variant                               | hypothetical protein |
| TGME49_297492 | p.Ala143Thr  | missense_variant                               | hypothetical protein |
| TGME49_297492 | p.Gln29*     | stop_gained                                    | hypothetical protein |
| TGME49_297495 | c.346+6C>T   | splice_region_variant                          | hypothetical protein |
| TGME49_297495 | c.346+4A>C   | splice_region_variant                          | hypothetical protein |
| TGME49_297495 | p.Ala102Thr  | missense_variant                               | hypothetical protein |
| TGME49_297495 | p.Asp56Ala   | missense_variant                               | hypothetical protein |
| TGME49_297505 | p.Gly18Ala   | missense_variant                               | hypothetical protein |
| TGME49_297505 | p.Arg24Gln   | missense_variant                               | hypothetical protein |
| TGME49_297510 | c.-866C>G    | 5_prime_UTR_premature_start_codon_gain_variant | hypothetical protein |
| TGME49_297510 | c.-518C>T    | 5_prime_UTR_premature_start_codon_gain_variant | hypothetical protein |
| TGME49_297510 | p.Ser94Leu   | missense_variant                               | hypothetical protein |
| TGME49_297643 | p.Gly118Arg  | missense_variant                               | hypothetical protein |
| TGME49_297647 | p.Arg112*    | stop_gained                                    | hypothetical protein |
| TGME49_297647 | p.Ile85Thr   | missense_variant                               | hypothetical protein |
| TGME49_297647 | c.-1682T>C   | 5_prime_UTR_premature_start_codon_gain_variant | hypothetical protein |
| TGME49_297660 | c.-152C>T    | 5_prime_UTR_premature_start_codon_gain_variant | hypothetical protein |
| TGME49_297660 | p.Thr91Ala   | missense_variant                               | hypothetical protein |
| TGME49_297660 | p.Gly145Glu  | missense_variant                               | hypothetical protein |
| TGME49_297690 | p.Thr1935Ala | missense_variant                               | hypothetical protein |
| TGME49_297690 | p.Asp1879Gly | missense_variant                               | hypothetical protein |
| TGME49_297690 | p.Asn1873Ser | missense_variant                               | hypothetical protein |
| TGME49_297690 | p.Gln1734Arg | missense_variant                               | hypothetical protein |
| TGME49_297690 | p.Ser1299Leu | missense_variant                               | hypothetical protein |
| TGME49_297690 | p.Phe1048Leu | missense_variant                               | hypothetical protein |
| TGME49_297690 | p.Ala826Thr  | missense_variant                               | hypothetical protein |
| TGME49_297690 | p.Ala705Thr  | missense_variant                               | hypothetical protein |
| TGME49_297690 | p.Cys357Tyr  | missense_variant                               | hypothetical protein |
| TGME49_297700 | p.Val74Ala   | missense_variant                               | hypothetical protein |



|               |              |                                                |                      |
|---------------|--------------|------------------------------------------------|----------------------|
| TGME49_297710 | c.-273G>C    | 5_prime_UTR_premature_start_codon_gain_variant | hypothetical protein |
| TGME49_297710 | p.Leu440Pro  | missense_variant                               | hypothetical protein |
| TGME49_297710 | p.Thr498Ala  | missense_variant                               | hypothetical protein |
| TGME49_297725 | c.196+2T>A   | splice_donor_variant                           | hypothetical protein |
| TGME49_297745 | p.Gly3795Ala | missense_variant                               | hypothetical protein |
| TGME49_297745 | p.Leu3468Phe | missense_variant                               | hypothetical protein |
| TGME49_297745 | p.Thr3368Ala | missense_variant                               | hypothetical protein |
| TGME49_297745 | p.Thr3223Ser | missense_variant                               | hypothetical protein |
| TGME49_297745 | p.Gly3203Val | missense_variant                               | hypothetical protein |
| TGME49_297745 | p.Leu2409Val | missense_variant                               | hypothetical protein |
| TGME49_297745 | p.Glu1883Val | missense_variant                               | hypothetical protein |
| TGME49_297745 | p.Asp967Glu  | missense_variant                               | hypothetical protein |
| TGME49_297745 | p.Ser39Phe   | missense_variant                               | hypothetical protein |
| TGME49_297760 | p.Gly22Arg   | missense_variant                               | hypothetical protein |
| TGME49_297770 | c.-2338C>T   | 5_prime_UTR_premature_start_codon_gain_variant | hypothetical protein |
| TGME49_297770 | c.-2320G>C   | 5_prime_UTR_premature_start_codon_gain_variant | hypothetical protein |
| TGME49_297770 | c.-2145C>T   | 5_prime_UTR_premature_start_codon_gain_variant | hypothetical protein |
| TGME49_297770 | c.-815A>T    | 5_prime_UTR_premature_start_codon_gain_variant | hypothetical protein |
| TGME49_297770 | p.His98Gln   | missense_variant                               | hypothetical protein |
| TGME49_297770 | p.Ser158Ala  | missense_variant                               | hypothetical protein |
| TGME49_297770 | p.Asp208Asn  | missense_variant                               | hypothetical protein |
| TGME49_297770 | p.Ala245Thr  | missense_variant                               | hypothetical protein |
| TGME49_297770 | p.Pro433Ser  | missense_variant                               | hypothetical protein |
| TGME49_297790 | p.Ser63Ala   | missense_variant                               | hypothetical protein |
| TGME49_297810 | p.Arg83Pro   | missense_variant                               | hypothetical protein |
| TGME49_297830 | p.Gln1285Glu | missense_variant                               | hypothetical protein |
| TGME49_297830 | p.Glu700Lys  | missense_variant                               | hypothetical protein |
| TGME49_297830 | p.Ser669Gly  | missense_variant                               | hypothetical protein |
| TGME49_297830 | p.Ala588Ser  | missense_variant                               | hypothetical protein |
| TGME49_297845 | p.His59Tyr   | missense_variant                               | hypothetical protein |
| TGME49_297845 | p.Thr189Met  | missense_variant                               | hypothetical protein |
| TGME49_297870 | p.Thr527Lys  | missense_variant                               | hypothetical protein |
| TGME49_297870 | p.Gln459His  | missense_variant                               | hypothetical protein |
| TGME49_297870 | p.Pro208Ser  | missense_variant                               | hypothetical protein |
| TGME49_297870 | p.Ser129Trp  | missense_variant                               | hypothetical protein |
| TGME49_297890 | p.Leu979Val  | missense_variant                               | hypothetical protein |
| TGME49_297890 | p.Pro1009Ser | missense_variant                               | hypothetical protein |
| TGME49_297890 | p.Pro1009Leu | missense_variant                               | hypothetical protein |
| TGME49_297890 | p.Ser1288Pro | missense_variant                               | hypothetical protein |
| TGME49_297890 | p.Arg1293Gly | missense_variant                               | hypothetical protein |
| TGME49_297890 | p.Glu1477Lys | missense_variant                               | hypothetical protein |
| TGME49_297900 | p.Lys112Asn  | missense_variant                               | hypothetical protein |
| TGME49_297900 | p.Arg380Ser  | missense_variant                               | hypothetical protein |
| TGME49_297910 | p.Thr211Ile  | missense_variant                               | hypothetical protein |
| TGME49_297910 | p.Asn175Ser  | missense_variant                               | hypothetical protein |
| TGME49_297920 | p.Val23Ala   | missense_variant                               | hypothetical protein |
| TGME49_297920 | p.Thr135Asn  | missense_variant                               | hypothetical protein |
| TGME49_297920 | p.Ser161Thr  | missense_variant                               | hypothetical protein |
| TGME49_297980 | c.-149G>T    | 5_prime_UTR_premature_start_codon_gain_variant | hypothetical protein |
| TGME49_298010 | p.Gln1977Lys | missense_variant                               | hypothetical protein |
| TGME49_298010 | c.5672-8T>C  | splice_region_variant                          | hypothetical protein |
| TGME49_298010 | p.Thr235Lys  | missense_variant                               | hypothetical protein |
| TGME49_298040 | p.Val520Ala  | missense_variant                               | hypothetical protein |
| TGME49_298040 | p.Ala140Thr  | missense_variant                               | hypothetical protein |
| TGME49_298050 | c.-190C>G    | 5_prime_UTR_premature_start_codon_gain_variant | hypothetical protein |
| TGME49_298050 | p.Asn391Ser  | missense_variant                               | hypothetical protein |
| TGME49_275830 | p.Lys351Asn  | missense_variant                               | hypothetical protein |
| TGME49_275830 | p.Ala352Pro  | missense_variant                               | hypothetical protein |
| TGME49_275830 | p.Glu363Gly  | missense_variant                               | hypothetical protein |
| TGME49_275830 | p.Ser911Pro  | missense_variant                               | hypothetical protein |
| TGME49_275830 | p.Pro912Ser  | missense_variant                               | hypothetical protein |
| TGME49_275830 | p.Gly989Asp  | missense_variant                               | hypothetical protein |
| TGME49_275830 | p.Lys1037Glu | missense_variant                               | hypothetical protein |
| TGME49_275780 | p.Gly655Asp  | missense_variant                               | hypothetical protein |
| TGME49_275780 | p.Ser196Pro  | missense_variant                               | hypothetical protein |
| TGME49_275780 | p.Glu141Asp  | missense_variant                               | hypothetical protein |
| TGME49_275780 | p.Pro73Ser   | missense_variant                               | hypothetical protein |
| TGME49_275760 | c.-661C>T    | 5_prime_UTR_premature_start_codon_gain_variant | hypothetical protein |
| TGME49_275760 | p.Arg44Leu   | missense_variant                               | hypothetical protein |
| TGME49_275760 | p.Arg101Leu  | missense_variant                               | hypothetical protein |
| TGME49_275740 | p.Gly30Arg   | missense_variant                               | hypothetical protein |
| TGME49_275740 | p.Glu675Val  | missense_variant                               | hypothetical protein |
| TGME49_275740 | p.Leu958Phe  | missense_variant                               | hypothetical protein |
| TGME49_275740 | p.Ala1173Val | missense_variant                               | hypothetical protein |
| TGME49_275740 | p.Thr1190Pro | missense_variant                               | hypothetical protein |
| TGME49_275740 | p.His1317Gln | missense_variant                               | hypothetical protein |
| TGME49_275740 | p.Glu1419Asp | missense_variant                               | hypothetical protein |
| TGME49_275710 | p.Ser441Pro  | missense_variant                               | hypothetical protein |
| TGME49_275710 | p.Ala188Gly  | missense_variant                               | hypothetical protein |
| TGME49_275710 | p.Arg123Gln  | missense_variant                               | hypothetical protein |
| TGME49_275700 | p.Arg196Leu  | missense_variant                               | hypothetical protein |
| TGME49_275680 | c.-1159A>T   | 5_prime_UTR_premature_start_codon_gain_variant | hypothetical protein |
| TGME49_275680 | p.Asp195Gly  | missense_variant                               | hypothetical protein |
| TGME49_275680 | p.Gln279Arg  | missense_variant                               | hypothetical protein |
| TGME49_275640 | c.-323G>A    | 5_prime_UTR_premature_start_codon_gain_variant | hypothetical protein |

|               |                  |                                                |                      |
|---------------|------------------|------------------------------------------------|----------------------|
| TGME49_252280 | p.Arg1431Ser     | missense_variant                               | hypothetical protein |
| TGME49_252280 | p.Ile1304Lys     | missense_variant                               | hypothetical protein |
| TGME49_252280 | p.Ser1190Ala     | missense_variant                               | hypothetical protein |
| TGME49_252280 | p.Glu674Gln      | missense_variant                               | hypothetical protein |
| TGME49_252280 | p.Gly486Arg      | missense_variant                               | hypothetical protein |
| TGME49_252280 | p.Glu459Ala      | missense_variant                               | hypothetical protein |
| TGME49_252280 | c.-679A>G        | 5_prime_UTR_premature_start_codon_gain_variant | hypothetical protein |
| TGME49_252295 | c.-666G>T        | 5_prime_UTR_premature_start_codon_gain_variant | hypothetical protein |
| TGME49_252295 | c.-176C>T        | 5_prime_UTR_premature_start_codon_gain_variant | hypothetical protein |
| TGME49_252295 | p.Pro7Leu        | missense_variant                               | hypothetical protein |
| TGME49_252295 | p.Arg14Leu       | missense_variant                               | hypothetical protein |
| TGME49_252295 | p.Ala127Pro      | missense_variant                               | hypothetical protein |
| TGME49_252300 | p.Ala281Gly      | missense_variant                               | hypothetical protein |
| TGME49_252300 | p.Leu278Phe      | missense_variant                               | hypothetical protein |
| TGME49_252300 | p.Ala274Val      | missense_variant                               | hypothetical protein |
| TGME49_252300 | p.Thr221Ala      | missense_variant                               | hypothetical protein |
| TGME49_252300 | p.Val205Ala      | missense_variant                               | hypothetical protein |
| TGME49_252300 | p.Asp73Ala       | missense_variant                               | hypothetical protein |
| TGME49_252300 | p.Thr30Pro       | missense_variant                               | hypothetical protein |
| TGME49_252310 | p.Ala78Val       | missense_variant                               | hypothetical protein |
| TGME49_252310 | p.Thr33Asn       | missense_variant                               | hypothetical protein |
| TGME49_252310 | p.Thr17Pro       | missense_variant                               | hypothetical protein |
| TGME49_252310 | c.-139C>T        | 5_prime_UTR_premature_start_codon_gain_variant | hypothetical protein |
| TGME49_252310 | c.-364A>T        | 5_prime_UTR_premature_start_codon_gain_variant | hypothetical protein |
| TGME49_252330 | p.Phe303Cys      | missense_variant                               | hypothetical protein |
| TGME49_252340 | p.Thr67Ser       | missense_variant                               | hypothetical protein |
| TGME49_252340 | p.Gly1067Glu     | missense_variant                               | hypothetical protein |
| TGME49_252340 | p.Asp1151Gly     | missense_variant                               | hypothetical protein |
| TGME49_252350 | c.-1236G>T       | 5_prime_UTR_premature_start_codon_gain_variant | hypothetical protein |
| TGME49_252380 | p.Ser1186Gly     | missense_variant                               | hypothetical protein |
| TGME49_252380 | p.Arg1006Gly     | missense_variant                               | hypothetical protein |
| TGME49_252380 | p.Val888Ala      | missense_variant                               | hypothetical protein |
| TGME49_252380 | p.Lys813Asn      | missense_variant                               | hypothetical protein |
| TGME49_252380 | p.Gln749Lys      | missense_variant                               | hypothetical protein |
| TGME49_252380 | p.Ala699Thr      | missense_variant                               | hypothetical protein |
| TGME49_252380 | c.866+7C>T       | splice_region_variant                          | hypothetical protein |
| TGME49_252380 | c.725-7T>C       | splice_region_variant                          | hypothetical protein |
| TGME49_252380 | p.Arg21Gln       | missense_variant                               | hypothetical protein |
| TGME49_252385 | p.Ter122Serext*? | stop_lost                                      | hypothetical protein |
| TGME49_252390 | c.-1575G>T       | 5_prime_UTR_premature_start_codon_gain_variant | hypothetical protein |
| TGME49_252395 | p.Arg55Leu       | missense_variant                               | hypothetical protein |
| TGME49_252395 | p.Glu665Ala      | missense_variant                               | hypothetical protein |
| TGME49_252395 | p.Gln729Glu      | missense_variant                               | hypothetical protein |
| TGME49_252395 | p.Met1080Val     | missense_variant                               | hypothetical protein |
| TGME49_252395 | p.Asn1354Ser     | missense_variant                               | hypothetical protein |
| TGME49_252395 | p.Leu1402Pro     | missense_variant                               | hypothetical protein |
| TGME49_252395 | p.Thr1672Ala     | missense_variant                               | hypothetical protein |
| TGME49_252430 | c.-2772G>A       | 5_prime_UTR_premature_start_codon_gain_variant | hypothetical protein |
| TGME49_252430 | c.-2185C>T       | 5_prime_UTR_premature_start_codon_gain_variant | hypothetical protein |
| TGME49_252430 | c.-556C>A        | 5_prime_UTR_premature_start_codon_gain_variant | hypothetical protein |
| TGME49_252430 | c.-51C>G         | 5_prime_UTR_premature_start_codon_gain_variant | hypothetical protein |
| TGME49_252430 | p.Ala30Val       | missense_variant                               | hypothetical protein |
| TGME49_252450 | p.Glu200Lys      | missense_variant                               | hypothetical protein |
| TGME49_252450 | p.Met210Leu      | missense_variant                               | hypothetical protein |
| TGME49_252450 | p.Met210Ile      | missense_variant                               | hypothetical protein |
| TGME49_252480 | c.-213C>T        | 5_prime_UTR_premature_start_codon_gain_variant | hypothetical protein |
| TGME49_252480 | p.Glu276Gln      | missense_variant                               | hypothetical protein |
| TGME49_252510 | c.124+5C>G       | splice_region_variant                          | hypothetical protein |
| TGME49_252630 | p.Gly109Cys      | missense_variant                               | hypothetical protein |
| TGME49_252630 | c.-668T>G        | 5_prime_UTR_premature_start_codon_gain_variant | hypothetical protein |
| TGME49_252630 | c.-846A>T        | 5_prime_UTR_premature_start_codon_gain_variant | hypothetical protein |
| TGME49_252870 | c.-336C>G        | 5_prime_UTR_premature_start_codon_gain_variant | hypothetical protein |
| TGME49_252870 | p.Tyr117His      | missense_variant                               | hypothetical protein |
| TGME49_252870 | p.Pro118Arg      | missense_variant                               | hypothetical protein |
| TGME49_252870 | p.Gly286Val      | missense_variant                               | hypothetical protein |
| TGME49_252870 | p.Ala643Thr      | missense_variant                               | hypothetical protein |
| TGME49_252870 | p.Ala760Thr      | missense_variant                               | hypothetical protein |
| TGME49_252870 | p.Ser1200Leu     | missense_variant                               | hypothetical protein |
| TGME49_252870 | p.Ala1229Glu     | missense_variant                               | hypothetical protein |
| TGME49_252880 | p.Val2341Ala     | missense_variant                               | hypothetical protein |
| TGME49_252880 | p.Lys2209Arg     | missense_variant                               | hypothetical protein |
| TGME49_252880 | p.Asn2089Thr     | missense_variant                               | hypothetical protein |
| TGME49_252880 | p.Lys1951Arg     | missense_variant                               | hypothetical protein |
| TGME49_252880 | p.Gly1899Ala     | missense_variant                               | hypothetical protein |
| TGME49_252880 | p.Val1581Leu     | missense_variant                               | hypothetical protein |
| TGME49_252880 | p.Thr1562Met     | missense_variant                               | hypothetical protein |
| TGME49_252880 | p.Ala1461Thr     | missense_variant                               | hypothetical protein |
| TGME49_252880 | p.Met1414Thr     | missense_variant                               | hypothetical protein |
| TGME49_252880 | p.Ala1137Gly     | missense_variant                               | hypothetical protein |
| TGME49_252880 | p.Ala709Ser      | missense_variant                               | hypothetical protein |
| TGME49_252880 | p.Pro408Ser      | missense_variant                               | hypothetical protein |
| TGME49_252880 | p.Ala311Pro      | missense_variant                               | hypothetical protein |
| TGME49_252890 | p.Phe7Leu        | missense_variant                               | hypothetical protein |
| TGME49_252890 | p.Ser21Pro       | missense_variant                               | hypothetical protein |
| TGME49_252990 | p.Ser289Pro      | missense_variant                               | hypothetical protein |

|               |              |                                                |                      |
|---------------|--------------|------------------------------------------------|----------------------|
| TGME49_252990 | p.Ser205Cys  | missense_variant                               | hypothetical protein |
| TGME49_252990 | p.Ala162Val  | missense_variant                               | hypothetical protein |
| TGME49_253020 | p.Ala36Thr   | missense_variant                               | hypothetical protein |
| TGME49_253020 | p.Arg3Ser    | missense_variant                               | hypothetical protein |
| TGME49_253020 | c.-572C>T    | 5_prime_UTR_premature_start_codon_gain_variant | hypothetical protein |
| TGME49_253020 | c.-1431T>C   | 5_prime_UTR_premature_start_codon_gain_variant | hypothetical protein |
| TGME49_253020 | c.-1530C>T   | 5_prime_UTR_premature_start_codon_gain_variant | hypothetical protein |
| TGME49_253050 | c.-13C>G     | 5_prime_UTR_premature_start_codon_gain_variant | hypothetical protein |
| TGME49_253050 | p.Val6Met    | missense_variant                               | hypothetical protein |
| TGME49_253050 | p.Pro136Thr  | missense_variant                               | hypothetical protein |
| TGME49_253050 | p.Leu224Val  | missense_variant                               | hypothetical protein |
| TGME49_253080 | p.Val186Met  | missense_variant                               | hypothetical protein |
| TGME49_253080 | p.Ser52Thr   | missense_variant                               | hypothetical protein |
| TGME49_253100 | p.Ala287Thr  | missense_variant                               | hypothetical protein |
| TGME49_253140 | p.Ile1336Asn | missense_variant                               | hypothetical protein |
| TGME49_253140 | p.Ala759Glu  | missense_variant                               | hypothetical protein |
| TGME49_253140 | p.Gly620Arg  | missense_variant                               | hypothetical protein |
| TGME49_253140 | p.Gly337Glu  | missense_variant                               | hypothetical protein |
| TGME49_253140 | p.Pro126Ser  | missense_variant                               | hypothetical protein |
| TGME49_253140 | p.Arg85Gln   | missense_variant                               | hypothetical protein |
| TGME49_253160 | p.His66Tyr   | missense_variant                               | hypothetical protein |
| TGME49_253400 | p.Ala204Ser  | missense_variant&splice_region_variant         | hypothetical protein |
| TGME49_253400 | p.Glu80Gly   | missense_variant                               | hypothetical protein |
| TGME49_253400 | c.-1025C>G   | 5_prime_UTR_premature_start_codon_gain_variant | hypothetical protein |
| TGME49_253490 | c.-574G>T    | 5_prime_UTR_premature_start_codon_gain_variant | hypothetical protein |
| TGME49_253490 | p.Ala403Thr  | missense_variant                               | hypothetical protein |
| TGME49_253490 | p.Lys1317Thr | missense_variant                               | hypothetical protein |
| TGME49_253500 | p.Glu199Asp  | missense_variant                               | hypothetical protein |
| TGME49_253530 | p.Leu119Val  | missense_variant                               | hypothetical protein |
| TGME49_253540 | p.Pro197Ser  | missense_variant                               | hypothetical protein |
| TGME49_253560 | p.Ala1826Thr | missense_variant                               | hypothetical protein |
| TGME49_253560 | p.Ala1312Thr | missense_variant                               | hypothetical protein |
| TGME49_253560 | p.Ser549Phe  | missense_variant                               | hypothetical protein |
| TGME49_253600 | p.Ala230Thr  | missense_variant                               | hypothetical protein |
| TGME49_253600 | p.Ser419Phe  | missense_variant                               | hypothetical protein |
| TGME49_253615 | p.Asp2032Val | missense_variant                               | hypothetical protein |
| TGME49_253615 | p.Gly1269Ser | missense_variant                               | hypothetical protein |
| TGME49_253615 | p.Ile1140Val | missense_variant                               | hypothetical protein |
| TGME49_253615 | p.Glu883Lys  | missense_variant                               | hypothetical protein |
| TGME49_253615 | p.Ser655Thr  | missense_variant                               | hypothetical protein |
| TGME49_253615 | p.Asp146Gly  | missense_variant                               | hypothetical protein |
| TGME49_253640 | c.-360G>C    | 5_prime_UTR_premature_start_codon_gain_variant | hypothetical protein |
| TGME49_253690 | c.-363G>A    | 5_prime_UTR_premature_start_codon_gain_variant | hypothetical protein |
| TGME49_253690 | p.Ala108Thr  | missense_variant                               | hypothetical protein |
| TGME49_253710 | p.Pro1021Arg | missense_variant                               | hypothetical protein |
| TGME49_253710 | c.179-8G>C   | splice_region_variant                          | hypothetical protein |
| TGME49_253740 | c.-184G>A    | 5_prime_UTR_premature_start_codon_gain_variant | hypothetical protein |
| TGME49_253810 | p.Glu1089Asp | missense_variant                               | hypothetical protein |
| TGME49_253810 | p.Ser34Thr   | missense_variant                               | hypothetical protein |
| TGME49_253820 | c.372+8G>A   | splice_region_variant                          | hypothetical protein |
| TGME49_253850 | p.Thr102Pro  | missense_variant                               | hypothetical protein |
| TGME49_253850 | p.Gln369Lys  | missense_variant                               | hypothetical protein |
| TGME49_253870 | p.Asp4569Asn | missense_variant                               | hypothetical protein |
| TGME49_253870 | p.Met4237Ile | missense_variant                               | hypothetical protein |
| TGME49_253870 | p.Pro4212Leu | missense_variant                               | hypothetical protein |
| TGME49_253870 | p.Ala4163Thr | missense_variant                               | hypothetical protein |
| TGME49_253870 | p.Ala3728Val | missense_variant                               | hypothetical protein |
| TGME49_253870 | p.Arg3568Leu | missense_variant                               | hypothetical protein |
| TGME49_253870 | p.Ala3502Gly | missense_variant                               | hypothetical protein |
| TGME49_253870 | p.Glu3324Gly | missense_variant                               | hypothetical protein |
| TGME49_253870 | p.Thr2924Arg | missense_variant                               | hypothetical protein |
| TGME49_253870 | p.Ala2725Ser | missense_variant                               | hypothetical protein |
| TGME49_253870 | p.Leu2454Val | missense_variant                               | hypothetical protein |
| TGME49_253870 | p.Phe2385Leu | missense_variant                               | hypothetical protein |
| TGME49_253870 | p.Pro2375Ala | missense_variant                               | hypothetical protein |
| TGME49_253870 | p.Lys2284Arg | missense_variant                               | hypothetical protein |
| TGME49_253870 | p.Lys2284Glu | missense_variant                               | hypothetical protein |
| TGME49_253870 | p.Ser2076Ala | missense_variant                               | hypothetical protein |
| TGME49_253870 | c.6192+5A>G  | splice_region_variant                          | hypothetical protein |
| TGME49_253870 | p.Gly1914Arg | missense_variant                               | hypothetical protein |
| TGME49_253870 | p.His1607Asn | missense_variant                               | hypothetical protein |
| TGME49_253870 | p.Ser1543Phe | missense_variant                               | hypothetical protein |
| TGME49_253870 | p.Cys1502Trp | missense_variant                               | hypothetical protein |
| TGME49_253870 | p.Ala1200Val | missense_variant                               | hypothetical protein |
| TGME49_253870 | p.Ala672Thr  | missense_variant                               | hypothetical protein |
| TGME49_253870 | p.Ser542Arg  | missense_variant                               | hypothetical protein |
| TGME49_253870 | p.Ser511Tyr  | missense_variant                               | hypothetical protein |
| TGME49_253870 | p.Ile439Thr  | missense_variant                               | hypothetical protein |
| TGME49_253870 | p.Gln210His  | missense_variant                               | hypothetical protein |
| TGME49_253870 | p.Ala188Val  | missense_variant                               | hypothetical protein |
| TGME49_253870 | p.Thr159Asn  | missense_variant                               | hypothetical protein |
| TGME49_253910 | p.Asp397Glu  | missense_variant                               | hypothetical protein |
| TGME49_253910 | p.Lys222Arg  | missense_variant                               | hypothetical protein |
| TGME49_253970 | p.Leu35Phe   | missense_variant                               | hypothetical protein |
| TGME49_253970 | p.Tyr93His   | missense_variant                               | hypothetical protein |

|               |              |                                                |                      |
|---------------|--------------|------------------------------------------------|----------------------|
| TGME49_253970 | p.Pro229Ser  | missense_variant                               | hypothetical protein |
| TGME49_253970 | p.Gln281Arg  | missense_variant                               | hypothetical protein |
| TGME49_253970 | p.Glu349Lys  | missense_variant                               | hypothetical protein |
| TGME49_253970 | p.Cys456Phe  | missense_variant                               | hypothetical protein |
| TGME49_253970 | p.Ala478Ser  | missense_variant                               | hypothetical protein |
| TGME49_253970 | p.Ser669Cys  | missense_variant                               | hypothetical protein |
| TGME49_253990 | c.-142C>T    | 5_prime_UTR_premature_start_codon_gain_variant | hypothetical protein |
| TGME49_253990 | c.-16G>C     | 5_prime_UTR_premature_start_codon_gain_variant | hypothetical protein |
| TGME49_253990 | p.Arg146Pro  | missense_variant                               | hypothetical protein |
| TGME49_253990 | p.Ser320Pro  | missense_variant                               | hypothetical protein |
| TGME49_253990 | p.Pro323Ser  | missense_variant                               | hypothetical protein |
| TGME49_253990 | p.Ala367Thr  | missense_variant                               | hypothetical protein |
| TGME49_253990 | p.Arg509Gly  | missense_variant                               | hypothetical protein |
| TGME49_253990 | p.Ala678Pro  | missense_variant                               | hypothetical protein |
| TGME49_253990 | p.Asp801Glu  | missense_variant                               | hypothetical protein |
| TGME49_253990 | p.Pro807Ala  | missense_variant                               | hypothetical protein |
| TGME49_253990 | p.Pro1012His | missense_variant                               | hypothetical protein |
| TGME49_253990 | p.Ser1020Ala | missense_variant                               | hypothetical protein |
| TGME49_253990 | p.Ser1381Gly | missense_variant                               | hypothetical protein |
| TGME49_253990 | p.Glu1402Val | missense_variant                               | hypothetical protein |
| TGME49_253990 | p.Leu1479Pro | missense_variant                               | hypothetical protein |
| TGME49_253990 | p.Leu1549Val | missense_variant                               | hypothetical protein |
| TGME49_253990 | p.Ala1596Val | missense_variant                               | hypothetical protein |
| TGME49_253990 | p.Ser1902Pro | missense_variant                               | hypothetical protein |
| TGME49_253990 | p.Ala1971Val | missense_variant                               | hypothetical protein |
| TGME49_254000 | p.Ala339Ser  | missense_variant                               | hypothetical protein |
| TGME49_254000 | p.Pro39Ala   | missense_variant                               | hypothetical protein |
| TGME49_254000 | c.-950T>G    | 5_prime_UTR_premature_start_codon_gain_variant | hypothetical protein |
| TGME49_254000 | c.-2714G>C   | 5_prime_UTR_premature_start_codon_gain_variant | hypothetical protein |
| TGME49_254070 | c.-2236C>T   | 5_prime_UTR_premature_start_codon_gain_variant | hypothetical protein |
| TGME49_254070 | c.-455C>T    | 5_prime_UTR_premature_start_codon_gain_variant | hypothetical protein |
| TGME49_254070 | p.Val90Ile   | missense_variant                               | hypothetical protein |
| TGME49_254070 | p.Ala203Val  | missense_variant                               | hypothetical protein |
| TGME49_254090 | p.Arg562His  | missense_variant                               | hypothetical protein |
| TGME49_254090 | p.Phe125Ser  | missense_variant                               | hypothetical protein |
| TGME49_254135 | p.Pro1268Leu | missense_variant                               | hypothetical protein |
| TGME49_254135 | p.Ser1105Asn | missense_variant                               | hypothetical protein |
| TGME49_254135 | p.Asn1071Asp | missense_variant                               | hypothetical protein |
| TGME49_254135 | p.Pro870Gln  | missense_variant                               | hypothetical protein |
| TGME49_254135 | p.Ala763Gly  | missense_variant                               | hypothetical protein |
| TGME49_254135 | p.Gln690Glu  | missense_variant                               | hypothetical protein |
| TGME49_254135 | p.Ser680Arg  | missense_variant                               | hypothetical protein |
| TGME49_254135 | p.Arg617Pro  | missense_variant                               | hypothetical protein |
| TGME49_254135 | p.Ala512Val  | missense_variant                               | hypothetical protein |
| TGME49_254135 | p.Phe141Cys  | missense_variant                               | hypothetical protein |
| TGME49_254135 | p.Arg82Gln   | missense_variant                               | hypothetical protein |
| TGME49_254135 | p.Phe55Ile   | missense_variant                               | hypothetical protein |
| TGME49_254135 | p.Tyr26Phe   | missense_variant                               | hypothetical protein |
| TGME49_254150 | p.Val654Ile  | missense_variant                               | hypothetical protein |
| TGME49_254150 | p.Ile619Ser  | missense_variant                               | hypothetical protein |
| TGME49_254150 | p.Glu603Lys  | missense_variant                               | hypothetical protein |
| TGME49_254150 | p.Gly507Val  | missense_variant                               | hypothetical protein |
| TGME49_254150 | p.Glu482Gln  | missense_variant                               | hypothetical protein |
| TGME49_254150 | p.Gln460Leu  | missense_variant                               | hypothetical protein |
| TGME49_254150 | c.-61A>C     | 5_prime_UTR_premature_start_codon_gain_variant | hypothetical protein |
| TGME49_254150 | c.-124G>C    | 5_prime_UTR_premature_start_codon_gain_variant | hypothetical protein |
| TGME49_254160 | c.-1820C>T   | 5_prime_UTR_premature_start_codon_gain_variant | hypothetical protein |
| TGME49_254160 | c.-678G>C    | 5_prime_UTR_premature_start_codon_gain_variant | hypothetical protein |
| TGME49_254160 | p.His252Asp  | missense_variant                               | hypothetical protein |
| TGME49_254160 | p.Arg292Gly  | missense_variant                               | hypothetical protein |
| TGME49_254160 | p.Ser314Ala  | missense_variant                               | hypothetical protein |
| TGME49_254160 | p.Pro337Ala  | missense_variant                               | hypothetical protein |
| TGME49_254160 | p.Arg786His  | missense_variant                               | hypothetical protein |
| TGME49_254160 | p.Asp1079Asn | missense_variant                               | hypothetical protein |
| TGME49_254160 | p.Tyr1354Cys | missense_variant                               | hypothetical protein |
| TGME49_254160 | p.Asn1371Asp | missense_variant                               | hypothetical protein |
| TGME49_254160 | p.Leu1372Val | missense_variant                               | hypothetical protein |
| TGME49_254160 | p.Lys1414Glu | missense_variant                               | hypothetical protein |
| TGME49_254160 | p.Gly1571Ala | missense_variant                               | hypothetical protein |
| TGME49_254160 | p.Glu1642Lys | missense_variant                               | hypothetical protein |
| TGME49_254160 | p.Asp1746Asn | missense_variant                               | hypothetical protein |
| TGME49_254160 | p.Arg1900Met | missense_variant                               | hypothetical protein |
| TGME49_254160 | p.Leu1986Val | missense_variant                               | hypothetical protein |
| TGME49_254160 | p.Gln1988Glu | missense_variant                               | hypothetical protein |
| TGME49_254160 | p.Gly1989Trp | missense_variant                               | hypothetical protein |
| TGME49_254160 | p.Val2031Ala | missense_variant                               | hypothetical protein |
| TGME49_254160 | p.Met2053Thr | missense_variant                               | hypothetical protein |
| TGME49_254160 | p.Glu2194Gln | missense_variant                               | hypothetical protein |
| TGME49_254160 | p.Glu2200Gly | missense_variant                               | hypothetical protein |
| TGME49_254160 | p.Ser2224Pro | missense_variant                               | hypothetical protein |
| TGME49_254160 | p.Gly2260Glu | missense_variant                               | hypothetical protein |
| TGME49_254160 | p.Val2279Ile | missense_variant                               | hypothetical protein |
| TGME49_254160 | p.Cys2353Trp | missense_variant                               | hypothetical protein |
| TGME49_254160 | p.Glu2634Gln | missense_variant                               | hypothetical protein |
| TGME49_254160 | p.Cys2665Ser | missense_variant                               | hypothetical protein |

|               |                  |                                                |                      |
|---------------|------------------|------------------------------------------------|----------------------|
| TGME49_254160 | p.Phe2725Leu     | missense_variant                               | hypothetical protein |
| TGME49_254160 | p.Ser2738Phe     | missense_variant                               | hypothetical protein |
| TGME49_254160 | p.Cys2980Gly     | missense_variant                               | hypothetical protein |
| TGME49_254160 | p.Glu3295Asp     | missense_variant                               | hypothetical protein |
| TGME49_254160 | c.10024+8C>T     | splice_region_variant                          | hypothetical protein |
| TGME49_254220 | p.Ala484Gly      | missense_variant                               | hypothetical protein |
| TGME49_254220 | p.Pro262Ser      | missense_variant                               | hypothetical protein |
| TGME49_254230 | p.Ala195Val      | missense_variant                               | hypothetical protein |
| TGME49_254255 | p.Thr138Ala      | missense_variant                               | hypothetical protein |
| TGME49_254255 | p.Phe135Ile      | missense_variant                               | hypothetical protein |
| TGME49_254255 | p.Arg79Gln       | missense_variant                               | hypothetical protein |
| TGME49_254255 | p.Leu71Val       | missense_variant                               | hypothetical protein |
| TGME49_254255 | p.Leu36Pro       | missense_variant                               | hypothetical protein |
| TGME49_254270 | c.-146T>G        | 5_prime_UTR_premature_start_codon_gain_variant | hypothetical protein |
| TGME49_254270 | p.Pro20Arg       | missense_variant                               | hypothetical protein |
| TGME49_254270 | p.Ala32Thr       | missense_variant                               | hypothetical protein |
| TGME49_254290 | p.Gly77Arg       | missense_variant                               | hypothetical protein |
| TGME49_254290 | p.Arg272Trp      | missense_variant                               | hypothetical protein |
| TGME49_254290 | p.Ser597Pro      | missense_variant                               | hypothetical protein |
| TGME49_254290 | p.Val684Ala      | missense_variant                               | hypothetical protein |
| TGME49_254290 | p.His870Pro      | missense_variant                               | hypothetical protein |
| TGME49_254290 | p.Gln956His      | missense_variant                               | hypothetical protein |
| TGME49_254290 | p.Gly1107Asp     | missense_variant                               | hypothetical protein |
| TGME49_254290 | p.Arg1331Gln     | missense_variant                               | hypothetical protein |
| TGME49_254290 | p.Ala1729Ser     | missense_variant                               | hypothetical protein |
| TGME49_254290 | p.Ala1729Gly     | missense_variant                               | hypothetical protein |
| TGME49_254290 | p.Ala1798Val     | missense_variant                               | hypothetical protein |
| TGME49_254300 | p.Gly1548Asp     | missense_variant                               | hypothetical protein |
| TGME49_254300 | p.Leu1737Phe     | missense_variant                               | hypothetical protein |
| TGME49_254320 | p.Ala64Val       | missense_variant                               | hypothetical protein |
| TGME49_254485 | p.Ter119Trpext*? | stop_lost                                      | hypothetical protein |
| TGME49_254485 | p.Pro12Arg       | missense_variant                               | hypothetical protein |
| TGME49_254500 | c.-774G>T        | 5_prime_UTR_premature_start_codon_gain_variant | hypothetical protein |
| TGME49_254500 | c.-171T>C        | 5_prime_UTR_premature_start_codon_gain_variant | hypothetical protein |
| TGME49_254500 | c.-51C>G         | 5_prime_UTR_premature_start_codon_gain_variant | hypothetical protein |
| TGME49_254500 | p.Ser127Ala      | missense_variant                               | hypothetical protein |
| TGME49_254500 | p.Thr233Ala      | missense_variant                               | hypothetical protein |
| TGME49_254500 | p.Ala488Gly      | missense_variant                               | hypothetical protein |
| TGME49_254530 | c.-969C>G        | 5_prime_UTR_premature_start_codon_gain_variant | hypothetical protein |
| TGME49_254530 | p.Pro19Leu       | missense_variant                               | hypothetical protein |
| TGME49_254530 | p.Ser154Ala      | missense_variant                               | hypothetical protein |
| TGME49_254530 | p.Pro348Arg      | missense_variant                               | hypothetical protein |
| TGME49_254530 | p.Ser460Ala      | missense_variant                               | hypothetical protein |
| TGME49_254530 | p.Ala514Thr      | missense_variant                               | hypothetical protein |
| TGME49_254530 | p.Arg697Leu      | missense_variant                               | hypothetical protein |
| TGME49_254530 | p.Gly847Ala      | missense_variant                               | hypothetical protein |
| TGME49_254530 | p.Ala1226Thr     | missense_variant                               | hypothetical protein |
| TGME49_254530 | p.Phe1404Leu     | missense_variant                               | hypothetical protein |
| TGME49_254530 | p.Ser1485Asn     | missense_variant                               | hypothetical protein |
| TGME49_254530 | c.4590-4T>G      | splice_region_variant                          | hypothetical protein |
| TGME49_254530 | p.Leu1549Met     | missense_variant                               | hypothetical protein |
| TGME49_254570 | p.Ser1890Pro     | missense_variant                               | hypothetical protein |
| TGME49_254570 | c.3719+6A>G      | splice_region_variant                          | hypothetical protein |
| TGME49_254570 | p.Glu587Lys      | missense_variant                               | hypothetical protein |
| TGME49_254570 | c.-93T>G         | 5_prime_UTR_premature_start_codon_gain_variant | hypothetical protein |
| TGME49_254810 | p.Val1518Ala     | missense_variant                               | hypothetical protein |
| TGME49_254810 | p.Asp1425Glu     | missense_variant                               | hypothetical protein |
| TGME49_254810 | p.Thr1161Arg     | missense_variant                               | hypothetical protein |
| TGME49_254810 | p.Glu950Lys      | missense_variant                               | hypothetical protein |
| TGME49_254810 | p.Thr603Ala      | missense_variant                               | hypothetical protein |
| TGME49_254820 | p.Asn134Tyr      | missense_variant                               | hypothetical protein |
| TGME49_254830 | p.Gly1152Asp     | missense_variant                               | hypothetical protein |
| TGME49_254830 | p.Asp990Tyr      | missense_variant                               | hypothetical protein |
| TGME49_254830 | p.Gln714Glu      | missense_variant                               | hypothetical protein |
| TGME49_254830 | p.Leu686Arg      | missense_variant                               | hypothetical protein |
| TGME49_254830 | p.Cys439Trp      | missense_variant                               | hypothetical protein |
| TGME49_254830 | p.Ser44Phe       | missense_variant                               | hypothetical protein |
| TGME49_254835 | p.Gly336Asp      | missense_variant                               | hypothetical protein |
| TGME49_254835 | p.Ala528Thr      | missense_variant                               | hypothetical protein |
| TGME49_254855 | p.Gln172His      | missense_variant                               | hypothetical protein |
| TGME49_254860 | p.Pro920Gln      | missense_variant                               | hypothetical protein |
| TGME49_254860 | p.Ala673Gly      | missense_variant                               | hypothetical protein |
| TGME49_254860 | p.Gln635His      | missense_variant                               | hypothetical protein |
| TGME49_254870 | p.Glu80Ala       | missense_variant                               | hypothetical protein |
| TGME49_254910 | p.Met448Val      | missense_variant                               | hypothetical protein |
| TGME49_254910 | p.Leu52Ile       | missense_variant                               | hypothetical protein |
| TGME49_254915 | c.-419C>T        | 5_prime_UTR_premature_start_codon_gain_variant | hypothetical protein |
| TGME49_254920 | p.Glu280Asp      | missense_variant                               | hypothetical protein |
| TGME49_254920 | p.Phe84Val       | missense_variant                               | hypothetical protein |
| TGME49_254930 | c.-200C>T        | 5_prime_UTR_premature_start_codon_gain_variant | hypothetical protein |
| TGME49_254930 | p.Arg335Met      | missense_variant                               | hypothetical protein |
| TGME49_254930 | p.Ala618Thr      | missense_variant                               | hypothetical protein |
| TGME49_254930 | p.Ser1092Asn     | missense_variant                               | hypothetical protein |
| TGME49_254960 | p.Leu1332Met     | missense_variant                               | hypothetical protein |
| TGME49_254960 | p.Glu1130Lys     | missense_variant                               | hypothetical protein |

|               |              |                                                |                      |
|---------------|--------------|------------------------------------------------|----------------------|
| TGME49_254960 | p.Gly938Arg  | missense_variant                               | hypothetical protein |
| TGME49_299270 | p.Ser194Phe  | missense_variant                               | hypothetical protein |
| TGME49_299260 | p.Ser84Pro   | missense_variant                               | hypothetical protein |
| TGME49_299260 | p.Ser148Asn  | missense_variant                               | hypothetical protein |
| TGME49_299250 | p.Thr859Ser  | missense_variant                               | hypothetical protein |
| TGME49_299250 | p.Ser426Pro  | missense_variant                               | hypothetical protein |
| TGME49_299250 | p.Thr74Ser   | missense_variant                               | hypothetical protein |
| TGME49_299240 | p.Thr4Asn    | missense_variant                               | hypothetical protein |
| TGME49_299240 | p.Pro73Ser   | missense_variant                               | hypothetical protein |
| TGME49_299240 | p.Ser195Ile  | missense_variant                               | hypothetical protein |
| TGME49_299160 | c.-675T>G    | 5_prime_UTR_premature_start_codon_gain_variant | hypothetical protein |
| TGME49_299160 | c.-57T>C     | 5_prime_UTR_premature_start_codon_gain_variant | hypothetical protein |
| TGME49_299160 | p.Lys94Thr   | missense_variant                               | hypothetical protein |
| TGME49_299160 | c.*755G>A    | splice_region_variant                          | hypothetical protein |
| TGME49_299130 | p.Asp2835Glu | missense_variant                               | hypothetical protein |
| TGME49_299130 | p.Trp2416Cys | missense_variant                               | hypothetical protein |
| TGME49_299130 | p.Gly2359Ser | missense_variant                               | hypothetical protein |
| TGME49_299130 | p.Glu2321Val | missense_variant                               | hypothetical protein |
| TGME49_299130 | p.Ser2298Ala | missense_variant                               | hypothetical protein |
| TGME49_299130 | p.Asp2253Ala | missense_variant                               | hypothetical protein |
| TGME49_299130 | p.Pro2154Thr | missense_variant                               | hypothetical protein |
| TGME49_299130 | p.Val2125Ala | missense_variant                               | hypothetical protein |
| TGME49_299130 | p.Ser2117Phe | missense_variant                               | hypothetical protein |
| TGME49_299130 | p.Leu1820Phe | missense_variant                               | hypothetical protein |
| TGME49_299130 | p.Gly1771Asp | missense_variant                               | hypothetical protein |
| TGME49_299130 | p.Gln1769Pro | missense_variant                               | hypothetical protein |
| TGME49_299130 | p.Gln1769Glu | missense_variant                               | hypothetical protein |
| TGME49_299130 | p.Arg1685Cys | missense_variant                               | hypothetical protein |
| TGME49_299130 | p.Phe1546Ile | missense_variant                               | hypothetical protein |
| TGME49_299130 | p.Asp1346Gly | missense_variant                               | hypothetical protein |
| TGME49_299130 | p.Arg1340Gly | missense_variant                               | hypothetical protein |
| TGME49_299130 | p.Lys1130Asn | missense_variant                               | hypothetical protein |
| TGME49_299130 | p.Asp1129Asn | missense_variant                               | hypothetical protein |
| TGME49_299130 | p.Gly936Glu  | missense_variant                               | hypothetical protein |
| TGME49_299130 | p.Pro877Thr  | missense_variant                               | hypothetical protein |
| TGME49_299130 | p.Asp810Glu  | missense_variant                               | hypothetical protein |
| TGME49_299130 | p.Ser802Asn  | missense_variant                               | hypothetical protein |
| TGME49_299130 | p.Ser665Phe  | missense_variant                               | hypothetical protein |
| TGME49_299130 | p.Val529Ala  | missense_variant                               | hypothetical protein |
| TGME49_299130 | p.His494Arg  | missense_variant                               | hypothetical protein |
| TGME49_299130 | p.Gly321Asp  | missense_variant                               | hypothetical protein |
| TGME49_299130 | p.Ala80Val   | missense_variant                               | hypothetical protein |
| TGME49_299120 | p.Gly61Asp   | missense_variant                               | hypothetical protein |
| TGME49_299100 | p.Arg2168Gln | missense_variant                               | hypothetical protein |
| TGME49_299100 | p.Gly1997Val | missense_variant                               | hypothetical protein |
| TGME49_299100 | p.Leu1534Arg | missense_variant                               | hypothetical protein |
| TGME49_299100 | p.Val1458Leu | missense_variant                               | hypothetical protein |
| TGME49_299100 | p.Val882Ala  | missense_variant                               | hypothetical protein |
| TGME49_299100 | p.Val874Gly  | missense_variant                               | hypothetical protein |
| TGME49_299100 | p.Glu652Asp  | missense_variant                               | hypothetical protein |
| TGME49_299100 | p.Leu186Phe  | missense_variant                               | hypothetical protein |
| TGME49_299100 | p.Leu104Pro  | missense_variant                               | hypothetical protein |
| TGME49_299100 | p.Phe103Leu  | missense_variant                               | hypothetical protein |
| TGME49_299100 | p.Cys83Arg   | missense_variant                               | hypothetical protein |
| TGME49_299100 | p.Ala31Thr   | missense_variant                               | hypothetical protein |
| TGME49_299100 | c.-149C>G    | 5_prime_UTR_premature_start_codon_gain_variant | hypothetical protein |
| TGME49_298840 | p.Gln62*     | stop_gained                                    | hypothetical protein |
| TGME49_320410 | p.Arg43Lys   | missense_variant                               | hypothetical protein |
| TGME49_320290 | p.Pro68Leu   | missense_variant                               | hypothetical protein |
| TGME49_320290 | p.Ala104Val  | missense_variant                               | hypothetical protein |
| TGME49_320280 | p.Tyr209Ser  | missense_variant                               | hypothetical protein |
| TGME49_320270 | p.Ser12Phe   | missense_variant                               | hypothetical protein |
| TGME49_320270 | p.Glu201Val  | missense_variant                               | hypothetical protein |
| TGME49_320270 | p.Pro470His  | missense_variant                               | hypothetical protein |
| TGME49_320270 | p.His645Asp  | missense_variant                               | hypothetical protein |
| TGME49_320260 | c.2150+4C>G  | splice_region_variant                          | hypothetical protein |
| TGME49_320260 | p.Ala406Ser  | missense_variant                               | hypothetical protein |
| TGME49_320160 | c.-1318C>G   | 5_prime_UTR_premature_start_codon_gain_variant | hypothetical protein |
| TGME49_320160 | c.-1064C>T   | 5_prime_UTR_premature_start_codon_gain_variant | hypothetical protein |
| TGME49_320160 | p.Glu246Ala  | missense_variant                               | hypothetical protein |
| TGME49_320160 | p.Val897Met  | missense_variant                               | hypothetical protein |
| TGME49_320160 | p.Asp898Gly  | missense_variant                               | hypothetical protein |
| TGME49_320160 | p.Gly904Arg  | missense_variant                               | hypothetical protein |
| TGME49_320160 | p.Phe1198Leu | missense_variant                               | hypothetical protein |
| TGME49_320160 | p.Thr1243Ser | missense_variant                               | hypothetical protein |
| TGME49_320160 | p.Thr1425Ser | missense_variant                               | hypothetical protein |
| TGME49_320160 | p.Ile1652Met | missense_variant                               | hypothetical protein |
| TGME49_320090 | p.Arg133Leu  | missense_variant                               | hypothetical protein |
| TGME49_320080 | p.Ala1327Pro | missense_variant                               | hypothetical protein |
| TGME49_320030 | p.His108Gln  | missense_variant                               | hypothetical protein |
| TGME49_320015 | c.-576C>A    | 5_prime_UTR_premature_start_codon_gain_variant | hypothetical protein |
| TGME49_320015 | p.Glu342Gln  | missense_variant                               | hypothetical protein |
| TGME49_320010 | c.2780+5G>A  | splice_region_variant                          | hypothetical protein |
| TGME49_320010 | p.Ala921Val  | missense_variant                               | hypothetical protein |
| TGME49_320010 | p.Ala188Glu  | missense_variant                               | hypothetical protein |

|               |              |                                                |                      |
|---------------|--------------|------------------------------------------------|----------------------|
| TGME49_320010 | c.-695G>A    | 5_prime_UTR_premature_start_codon_gain_variant | hypothetical protein |
| TGME49_320005 | c.-439C>T    | 5_prime_UTR_premature_start_codon_gain_variant | hypothetical protein |
| TGME49_320005 | p.Ile204Thr  | missense_variant                               | hypothetical protein |
| TGME49_319992 | p.Ala191Val  | missense_variant                               | hypothetical protein |
| TGME49_319988 | p.Leu82Ser   | missense_variant                               | hypothetical protein |
| TGME49_319988 | p.Asp72Val   | missense_variant                               | hypothetical protein |
| TGME49_319988 | p.Met1?      | start_lost                                     | hypothetical protein |
| TGME49_319980 | p.Ile221Leu  | missense_variant                               | hypothetical protein |
| TGME49_319980 | p.Asp81Gly   | missense_variant                               | hypothetical protein |
| TGME49_319940 | c.-620C>T    | 5_prime_UTR_premature_start_codon_gain_variant | hypothetical protein |
| TGME49_319940 | p.Ala152Val  | missense_variant                               | hypothetical protein |
| TGME49_319935 | p.His41Arg   | missense_variant                               | hypothetical protein |
| TGME49_319930 | p.Met812Ile  | missense_variant                               | hypothetical protein |
| TGME49_319930 | p.Glu675Ala  | missense_variant                               | hypothetical protein |
| TGME49_319930 | p.Thr627Ile  | missense_variant                               | hypothetical protein |
| TGME49_319900 | p.Asp2299His | missense_variant                               | hypothetical protein |
| TGME49_319900 | p.Thr1908Pro | missense_variant                               | hypothetical protein |
| TGME49_319900 | p.His1143Arg | missense_variant                               | hypothetical protein |
| TGME49_319900 | p.Gly1019Val | missense_variant                               | hypothetical protein |
| TGME49_319900 | p.Glu918Asp  | missense_variant                               | hypothetical protein |
| TGME49_319900 | p.Arg907Cys  | missense_variant                               | hypothetical protein |
| TGME49_319900 | p.Gly545Arg  | missense_variant                               | hypothetical protein |
| TGME49_319900 | p.Arg521His  | missense_variant                               | hypothetical protein |
| TGME49_319900 | p.Ser487Pro  | missense_variant                               | hypothetical protein |
| TGME49_319900 | p.Arg445Gln  | missense_variant                               | hypothetical protein |
| TGME49_319900 | p.Arg398Gln  | missense_variant                               | hypothetical protein |
| TGME49_319900 | p.Pro323Thr  | missense_variant                               | hypothetical protein |
| TGME49_319900 | p.Pro289Ala  | missense_variant                               | hypothetical protein |
| TGME49_319900 | p.Thr286Ala  | missense_variant                               | hypothetical protein |
| TGME49_319900 | p.Gly284Arg  | missense_variant                               | hypothetical protein |
| TGME49_319900 | p.Asp278His  | missense_variant                               | hypothetical protein |
| TGME49_319900 | p.Asp68Ala   | missense_variant                               | hypothetical protein |
| TGME49_319900 | p.His60Pro   | missense_variant                               | hypothetical protein |
| TGME49_319900 | c.-57T>G     | 5_prime_UTR_premature_start_codon_gain_variant | hypothetical protein |
| TGME49_319900 | c.-977C>T    | 5_prime_UTR_premature_start_codon_gain_variant | hypothetical protein |
| TGME49_319900 | c.-1233T>G   | 5_prime_UTR_premature_start_codon_gain_variant | hypothetical protein |
| TGME49_319900 | c.-1500C>T   | 5_prime_UTR_premature_start_codon_gain_variant | hypothetical protein |
| TGME49_319890 | p.Val134Ile  | missense_variant                               | hypothetical protein |
| TGME49_319720 | p.Ser750Arg  | missense_variant                               | hypothetical protein |
| TGME49_319720 | p.Glu517Gly  | missense_variant                               | hypothetical protein |
| TGME49_319720 | p.Gly447Ser  | missense_variant                               | hypothetical protein |
| TGME49_319720 | p.Ala392Thr  | missense_variant                               | hypothetical protein |
| TGME49_319690 | c.274-4C>A   | splice_region_variant                          | hypothetical protein |
| TGME49_319690 | c.239-3C>T   | splice_region_variant                          | hypothetical protein |
| TGME49_319680 | p.Ala19Val   | missense_variant                               | hypothetical protein |
| TGME49_319680 | c.716-5A>C   | splice_region_variant                          | hypothetical protein |
| TGME49_319680 | c.797-3C>G   | splice_region_variant                          | hypothetical protein |
| TGME49_319670 | c.-52T>G     | 5_prime_UTR_premature_start_codon_gain_variant | hypothetical protein |
| TGME49_319670 | c.-148C>G    | 5_prime_UTR_premature_start_codon_gain_variant | hypothetical protein |
| TGME49_319640 | p.Ala132Pro  | missense_variant                               | hypothetical protein |
| TGME49_319640 | p.Lys176Asn  | missense_variant                               | hypothetical protein |
| TGME49_319630 | c.-739C>T    | 5_prime_UTR_premature_start_codon_gain_variant | hypothetical protein |
| TGME49_319620 | c.-1428T>G   | 5_prime_UTR_premature_start_codon_gain_variant | hypothetical protein |
| TGME49_319620 | p.Thr463Ala  | missense_variant                               | hypothetical protein |
| TGME49_319620 | p.Met475Leu  | missense_variant                               | hypothetical protein |
| TGME49_319620 | p.Ser624Gly  | missense_variant                               | hypothetical protein |
| TGME49_319590 | c.236+6A>G   | splice_region_variant                          | hypothetical protein |
| TGME49_319590 | p.Ala170Gly  | missense_variant                               | hypothetical protein |
| TGME49_319590 | p.Ser533Ala  | missense_variant                               | hypothetical protein |
| TGME49_319590 | p.Ser943Pro  | missense_variant                               | hypothetical protein |
| TGME49_319590 | p.Glu963Gly  | missense_variant                               | hypothetical protein |
| TGME49_319590 | p.Ser1061Ala | missense_variant                               | hypothetical protein |
| TGME49_319590 | p.Glu1540Asp | missense_variant                               | hypothetical protein |
| TGME49_319590 | p.Arg1548Gly | missense_variant                               | hypothetical protein |
| TGME49_319590 | p.Ser1608Asn | missense_variant                               | hypothetical protein |
| TGME49_319590 | p.Asp1620Asn | missense_variant                               | hypothetical protein |
| TGME49_319590 | p.Ile1626Phe | missense_variant                               | hypothetical protein |
| TGME49_319590 | p.Thr1639Met | missense_variant                               | hypothetical protein |
| TGME49_319590 | p.His1726Gln | missense_variant                               | hypothetical protein |
| TGME49_319590 | p.Gln2120His | missense_variant                               | hypothetical protein |
| TGME49_319580 | p.Ser167Pro  | missense_variant                               | hypothetical protein |
| TGME49_319580 | p.His448Gln  | missense_variant                               | hypothetical protein |
| TGME49_319580 | p.Thr812Pro  | missense_variant                               | hypothetical protein |
| TGME49_319580 | p.Arg921His  | missense_variant                               | hypothetical protein |
| TGME49_319580 | p.Glu1368Asp | missense_variant                               | hypothetical protein |
| TGME49_319580 | p.Ala1585Val | missense_variant                               | hypothetical protein |
| TGME49_319580 | p.Ala1887Ser | missense_variant                               | hypothetical protein |
| TGME49_319580 | p.Gly2013Ala | missense_variant                               | hypothetical protein |
| TGME49_319540 | p.Asn427Ser  | missense_variant                               | hypothetical protein |
| TGME49_319540 | p.Pro356Ser  | missense_variant                               | hypothetical protein |
| TGME49_319540 | c.-786G>A    | 5_prime_UTR_premature_start_codon_gain_variant | hypothetical protein |
| TGME49_319520 | p.Ala1340Ser | missense_variant                               | hypothetical protein |
| TGME49_319520 | p.Gln1095His | missense_variant                               | hypothetical protein |
| TGME49_319520 | p.Gly306Cys  | missense_variant                               | hypothetical protein |
| TGME49_319510 | p.Ser30Arg   | missense_variant                               | hypothetical protein |

|               |              |                                                |                      |
|---------------|--------------|------------------------------------------------|----------------------|
| TGME49_319510 | c.-44C>G     | 5_prime_UTR_premature_start_codon_gain_variant | hypothetical protein |
| TGME49_319510 | c.-306A>G    | 5_prime_UTR_premature_start_codon_gain_variant | hypothetical protein |
| TGME49_319510 | c.-342C>T    | 5_prime_UTR_premature_start_codon_gain_variant | hypothetical protein |
| TGME49_319390 | p.Ser812Asn  | missense_variant                               | hypothetical protein |
| TGME49_319390 | p.Lys703Glu  | missense_variant                               | hypothetical protein |
| TGME49_319390 | p.Ala393Thr  | missense_variant                               | hypothetical protein |
| TGME49_319380 | p.Asp115Asn  | missense_variant                               | hypothetical protein |
| TGME49_319380 | p.Phe328Leu  | missense_variant                               | hypothetical protein |
| TGME49_319380 | p.Thr330Pro  | missense_variant                               | hypothetical protein |
| TGME49_319380 | p.Leu370Ser  | missense_variant                               | hypothetical protein |
| TGME49_319380 | p.Asp489Asn  | missense_variant                               | hypothetical protein |
| TGME49_319380 | p.Phe920Val  | missense_variant                               | hypothetical protein |
| TGME49_319380 | p.Pro975Ser  | missense_variant                               | hypothetical protein |
| TGME49_319380 | p.Ala1157Val | missense_variant                               | hypothetical protein |
| TGME49_319380 | p.Val1220Leu | missense_variant                               | hypothetical protein |
| TGME49_319380 | p.Ser1226Asn | missense_variant                               | hypothetical protein |
| TGME49_319380 | p.Arg1354Leu | missense_variant                               | hypothetical protein |
| TGME49_319380 | p.Ala1386Gly | missense_variant                               | hypothetical protein |
| TGME49_319380 | p.Phe1450Leu | missense_variant                               | hypothetical protein |
| TGME49_319380 | p.Gly1467Arg | missense_variant                               | hypothetical protein |
| TGME49_319380 | p.Glu1601Lys | missense_variant                               | hypothetical protein |
| TGME49_319380 | p.Gly1726Ser | missense_variant                               | hypothetical protein |
| TGME49_319380 | p.Arg1734Gln | missense_variant                               | hypothetical protein |
| TGME49_319380 | p.Glu1808Lys | missense_variant                               | hypothetical protein |
| TGME49_319380 | p.Pro1964Ser | missense_variant                               | hypothetical protein |
| TGME49_319380 | p.Asn1975Ile | missense_variant                               | hypothetical protein |
| TGME49_319380 | p.Val2213Ile | missense_variant                               | hypothetical protein |
| TGME49_319380 | p.Ser2504Trp | missense_variant                               | hypothetical protein |
| TGME49_319380 | p.Glu2600Lys | missense_variant                               | hypothetical protein |
| TGME49_319370 | p.Ala2247Gly | missense_variant                               | hypothetical protein |
| TGME49_319370 | p.Thr2164Ala | missense_variant                               | hypothetical protein |
| TGME49_319370 | p.Asp2015Asn | missense_variant                               | hypothetical protein |
| TGME49_319370 | p.His1214Arg | missense_variant                               | hypothetical protein |
| TGME49_319370 | p.Arg1092Cys | missense_variant                               | hypothetical protein |
| TGME49_319370 | p.Gln1049Glu | missense_variant                               | hypothetical protein |
| TGME49_319370 | p.Ala1042Gly | missense_variant                               | hypothetical protein |
| TGME49_319370 | p.Arg1003Thr | missense_variant                               | hypothetical protein |
| TGME49_319370 | p.Pro994Ser  | missense_variant                               | hypothetical protein |
| TGME49_319370 | p.Glu939Gly  | missense_variant                               | hypothetical protein |
| TGME49_319370 | p.Leu917Ser  | missense_variant                               | hypothetical protein |
| TGME49_319370 | p.Arg886Gly  | missense_variant                               | hypothetical protein |
| TGME49_319370 | p.Thr788Ile  | missense_variant                               | hypothetical protein |
| TGME49_319370 | p.Ser760Leu  | missense_variant                               | hypothetical protein |
| TGME49_319370 | p.Glu475Gly  | missense_variant                               | hypothetical protein |
| TGME49_319370 | p.Arg205Cys  | missense_variant                               | hypothetical protein |
| TGME49_319370 | p.Val92Met   | missense_variant                               | hypothetical protein |
| TGME49_319370 | p.Gln14Glu   | missense_variant                               | hypothetical protein |
| TGME49_319370 | c.-444T>C    | 5_prime_UTR_premature_start_codon_gain_variant | hypothetical protein |
| TGME49_319340 | c.-1378A>G   | 5_prime_UTR_premature_start_codon_gain_variant | hypothetical protein |
| TGME49_319340 | p.Cys47Arg   | missense_variant                               | hypothetical protein |
| TGME49_319320 | p.Ala802Val  | missense_variant                               | hypothetical protein |
| TGME49_319312 | p.Ser204Asn  | missense_variant                               | hypothetical protein |
| TGME49_319312 | p.Glu1247Asp | missense_variant                               | hypothetical protein |
| TGME49_319312 | p.Arg1261Gly | missense_variant                               | hypothetical protein |
| TGME49_319312 | p.Glu1276Lys | missense_variant                               | hypothetical protein |
| TGME49_319312 | p.Glu1514Val | missense_variant                               | hypothetical protein |
| TGME49_319308 | c.19+8A>G    | splice_region_variant                          | hypothetical protein |
| TGME49_319308 | c.317-8T>C   | splice_region_variant                          | hypothetical protein |
| TGME49_319308 | p.Glu494Asp  | missense_variant                               | hypothetical protein |
| TGME49_319308 | c.1542+7A>G  | splice_region_variant                          | hypothetical protein |
| TGME49_319308 | c.1543-7T>G  | splice_region_variant                          | hypothetical protein |
| TGME49_319308 | p.Tyr632His  | missense_variant                               | hypothetical protein |
| TGME49_319308 | p.Lys656Asn  | missense_variant                               | hypothetical protein |
| TGME49_319308 | c.2443-6T>C  | splice_region_variant                          | hypothetical protein |
| TGME49_319308 | p.Gln1195Lys | missense_variant                               | hypothetical protein |
| TGME49_319308 | p.Ile1208Val | missense_variant                               | hypothetical protein |
| TGME49_319308 | p.Leu1298Val | missense_variant                               | hypothetical protein |
| TGME49_319308 | p.Asn1324Thr | missense_variant                               | hypothetical protein |
| TGME49_319308 | p.Thr1642Asn | missense_variant                               | hypothetical protein |
| TGME49_319308 | p.Arg1834Thr | missense_variant                               | hypothetical protein |
| TGME49_319300 | p.Asn948Thr  | missense_variant                               | hypothetical protein |
| TGME49_319300 | p.Leu895Phe  | missense_variant                               | hypothetical protein |
| TGME49_318640 | p.Arg677Lys  | missense_variant                               | hypothetical protein |
| TGME49_318640 | p.Gly441Glu  | missense_variant                               | hypothetical protein |
| TGME49_318550 | c.-293C>A    | 5_prime_UTR_premature_start_codon_gain_variant | hypothetical protein |
| TGME49_318525 | p.Val676Gly  | missense_variant                               | hypothetical protein |
| TGME49_318525 | p.Lys266Asn  | missense_variant                               | hypothetical protein |
| TGME49_318525 | p.Val155Ala  | missense_variant                               | hypothetical protein |
| TGME49_318400 | p.Val1372Ile | missense_variant                               | hypothetical protein |
| TGME49_318400 | p.Leu779Val  | missense_variant                               | hypothetical protein |
| TGME49_318400 | c.1768-7T>C  | splice_region_variant                          | hypothetical protein |
| TGME49_318400 | p.Gln197Pro  | missense_variant                               | hypothetical protein |
| TGME49_318400 | c.-42A>G     | 5_prime_UTR_premature_start_codon_gain_variant | hypothetical protein |
| TGME49_318400 | c.-1319C>T   | 5_prime_UTR_premature_start_codon_gain_variant | hypothetical protein |
| TGME49_318400 | c.-2004C>T   | 5_prime_UTR_premature_start_codon_gain_variant | hypothetical protein |



|               |              |                                                |                      |
|---------------|--------------|------------------------------------------------|----------------------|
| TGME49_318400 | c.-2885C>A   | 5_prime_UTR_premature_start_codon_gain_variant | hypothetical protein |
| TGME49_318400 | c.-3163C>T   | 5_prime_UTR_premature_start_codon_gain_variant | hypothetical protein |
| TGME49_318400 | c.-3793A>T   | 5_prime_UTR_premature_start_codon_gain_variant | hypothetical protein |
| TGME49_318400 | c.-4114C>T   | 5_prime_UTR_premature_start_codon_gain_variant | hypothetical protein |
| TGME49_318390 | p.Cys57Arg   | missense_variant                               | hypothetical protein |
| TGME49_318390 | p.Gln105Leu  | missense_variant                               | hypothetical protein |
| TGME49_318390 | p.Gly159Asp  | missense_variant                               | hypothetical protein |
| TGME49_318390 | p.Gln190Arg  | missense_variant                               | hypothetical protein |
| TGME49_318390 | p.Glu204Gly  | missense_variant                               | hypothetical protein |
| TGME49_318390 | p.Glu378Asp  | missense_variant                               | hypothetical protein |
| TGME49_318390 | p.Ala928Thr  | missense_variant                               | hypothetical protein |
| TGME49_318380 | p.Ala64Ser   | missense_variant                               | hypothetical protein |
| TGME49_318380 | p.Met129Val  | missense_variant                               | hypothetical protein |
| TGME49_318380 | p.Asp132Tyr  | missense_variant                               | hypothetical protein |
| TGME49_318380 | p.Ile147Met  | missense_variant                               | hypothetical protein |
| TGME49_318380 | p.Asn149Asp  | missense_variant                               | hypothetical protein |
| TGME49_318380 | p.His308Arg  | missense_variant                               | hypothetical protein |
| TGME49_318370 | p.Ser115Phe  | missense_variant                               | hypothetical protein |
| TGME49_318370 | p.Arg102Ser  | missense_variant                               | hypothetical protein |
| TGME49_318370 | p.Ala82Gly   | missense_variant                               | hypothetical protein |
| TGME49_318370 | p.Val66Met   | missense_variant                               | hypothetical protein |
| TGME49_318370 | p.Ala17Ser   | missense_variant                               | hypothetical protein |
| TGME49_318340 | p.Pro53Ala   | missense_variant                               | hypothetical protein |
| TGME49_318300 | p.Thr22Ser   | missense_variant                               | hypothetical protein |
| TGME49_318300 | c.-546G>T    | 5_prime_UTR_premature_start_codon_gain_variant | hypothetical protein |
| TGME49_318290 | p.Leu457Val  | missense_variant                               | hypothetical protein |
| TGME49_318220 | p.Lys455Arg  | missense_variant                               | hypothetical protein |
| TGME49_318220 | p.Asn188Ser  | missense_variant                               | hypothetical protein |
| TGME49_318220 | p.Arg177Ser  | missense_variant                               | hypothetical protein |
| TGME49_318220 | p.Ile43Thr   | missense_variant                               | hypothetical protein |
| TGME49_318210 | p.Asp1108Gly | missense_variant                               | hypothetical protein |
| TGME49_318210 | p.Arg1100Gly | missense_variant                               | hypothetical protein |
| TGME49_318210 | p.Ile624Val  | missense_variant                               | hypothetical protein |
| TGME49_318210 | p.Gly240Glu  | missense_variant                               | hypothetical protein |
| TGME49_318210 | p.Asn211His  | missense_variant                               | hypothetical protein |
| TGME49_318210 | p.Val190Leu  | missense_variant                               | hypothetical protein |
| TGME49_318210 | p.Gly187Ala  | missense_variant                               | hypothetical protein |
| TGME49_318210 | p.Thr178Ser  | missense_variant                               | hypothetical protein |
| TGME49_318210 | p.Asp162Gly  | missense_variant                               | hypothetical protein |
| TGME49_318210 | c.-502G>C    | 5_prime_UTR_premature_start_codon_gain_variant | hypothetical protein |
| TGME49_318210 | c.-1195C>T   | 5_prime_UTR_premature_start_codon_gain_variant | hypothetical protein |
| TGME49_318210 | c.-1731A>C   | 5_prime_UTR_premature_start_codon_gain_variant | hypothetical protein |
| TGME49_318170 | p.Val198Ala  | missense_variant                               | hypothetical protein |
| TGME49_318170 | c.-1460G>C   | 5_prime_UTR_premature_start_codon_gain_variant | hypothetical protein |
| TGME49_318120 | p.Thr7Met    | missense_variant                               | hypothetical protein |
| TGME49_211700 | p.Tyr2237Asp | missense_variant                               | hypothetical protein |
| TGME49_211700 | p.Ser1488Asn | missense_variant                               | hypothetical protein |
| TGME49_211700 | p.Glu1482Gln | missense_variant                               | hypothetical protein |
| TGME49_211700 | p.Val1461Met | missense_variant                               | hypothetical protein |
| TGME49_211700 | p.Ala1002Ser | missense_variant                               | hypothetical protein |
| TGME49_211700 | p.Thr774Arg  | missense_variant                               | hypothetical protein |
| TGME49_211700 | p.Leu114Val  | missense_variant                               | hypothetical protein |
| TGME49_211695 | p.Pro43Ser   | missense_variant                               | hypothetical protein |
| TGME49_211695 | p.Leu72His   | missense_variant                               | hypothetical protein |
| TGME49_211695 | p.Ala284Thr  | missense_variant                               | hypothetical protein |
| TGME49_211695 | p.Ala287Gly  | missense_variant                               | hypothetical protein |
| TGME49_211695 | p.Ala363Val  | missense_variant                               | hypothetical protein |
| TGME49_211675 | p.Met1?      | start_lost                                     | hypothetical protein |
| TGME49_211660 | p.Ser192Pro  | missense_variant                               | hypothetical protein |
| TGME49_211660 | p.Gln111Arg  | missense_variant                               | hypothetical protein |
| TGME49_211650 | p.Arg376His  | missense_variant                               | hypothetical protein |
| TGME49_211650 | p.Thr194Ser  | missense_variant                               | hypothetical protein |
| TGME49_211650 | c.-281C>T    | 5_prime_UTR_premature_start_codon_gain_variant | hypothetical protein |
| TGME49_211650 | c.-487C>T    | 5_prime_UTR_premature_start_codon_gain_variant | hypothetical protein |
| TGME49_211650 | c.-529C>A    | 5_prime_UTR_premature_start_codon_gain_variant | hypothetical protein |
| TGME49_211640 | p.Pro2768Ser | missense_variant                               | hypothetical protein |
| TGME49_211640 | p.Pro2753Leu | missense_variant                               | hypothetical protein |
| TGME49_211640 | p.Ala2718Ser | missense_variant                               | hypothetical protein |
| TGME49_211640 | p.Pro2661Leu | missense_variant                               | hypothetical protein |
| TGME49_211640 | p.Ala2612Gly | missense_variant                               | hypothetical protein |
| TGME49_211640 | p.Glu2589Gly | missense_variant                               | hypothetical protein |
| TGME49_211640 | p.Val2431Ala | missense_variant                               | hypothetical protein |
| TGME49_211640 | p.Leu2276Val | missense_variant                               | hypothetical protein |
| TGME49_211640 | p.Val2168Ala | missense_variant                               | hypothetical protein |
| TGME49_211640 | p.Gly1769Glu | missense_variant                               | hypothetical protein |
| TGME49_211640 | p.Val1647Leu | missense_variant                               | hypothetical protein |
| TGME49_211640 | p.Thr1617Ala | missense_variant                               | hypothetical protein |
| TGME49_211640 | p.Arg1151Leu | missense_variant                               | hypothetical protein |
| TGME49_211640 | p.Met1134Lys | missense_variant                               | hypothetical protein |
| TGME49_211640 | p.Ile1107Thr | missense_variant                               | hypothetical protein |
| TGME49_211640 | p.Arg1075Lys | missense_variant                               | hypothetical protein |
| TGME49_211640 | p.Asn724Ser  | missense_variant                               | hypothetical protein |
| TGME49_211640 | p.Val378Ala  | missense_variant                               | hypothetical protein |
| TGME49_211640 | p.Pro110Leu  | missense_variant                               | hypothetical protein |
| TGME49_211640 | p.Ser67Tyr   | missense_variant                               | hypothetical protein |

|               |              |                                                |                      |
|---------------|--------------|------------------------------------------------|----------------------|
| TGME49_211610 | p.Pro756Ser  | missense_variant                               | hypothetical protein |
| TGME49_211610 | p.Arg738His  | missense_variant                               | hypothetical protein |
| TGME49_211610 | p.Ser723Asn  | missense_variant                               | hypothetical protein |
| TGME49_211610 | p.Leu365Phe  | missense_variant                               | hypothetical protein |
| TGME49_211610 | p.Ser57Gly   | missense_variant                               | hypothetical protein |
| TGME49_211600 | c.-176C>T    | 5_prime_UTR_premature_start_codon_gain_variant | hypothetical protein |
| TGME49_211600 | p.Ile20Leu   | missense_variant                               | hypothetical protein |
| TGME49_211600 | p.Ser121Cys  | missense_variant                               | hypothetical protein |
| TGME49_211600 | p.Thr242Ala  | missense_variant                               | hypothetical protein |
| TGME49_211600 | p.Pro531Leu  | missense_variant                               | hypothetical protein |
| TGME49_211600 | p.Gly674Val  | missense_variant                               | hypothetical protein |
| TGME49_211600 | p.Lys797Asn  | missense_variant                               | hypothetical protein |
| TGME49_211600 | p.Pro861Leu  | missense_variant                               | hypothetical protein |
| TGME49_211600 | p.Ala1024Thr | missense_variant                               | hypothetical protein |
| TGME49_211600 | p.Ser1181Ala | missense_variant                               | hypothetical protein |
| TGME49_211600 | p.Pro1184Ala | missense_variant                               | hypothetical protein |
| TGME49_211600 | p.Gly1323Ser | missense_variant                               | hypothetical protein |
| TGME49_211600 | p.Ala1404Val | missense_variant                               | hypothetical protein |
| TGME49_211600 | p.Ser1410Pro | missense_variant                               | hypothetical protein |
| TGME49_211600 | p.Ala1411Glu | missense_variant                               | hypothetical protein |
| TGME49_211600 | p.Cys1424Ser | missense_variant                               | hypothetical protein |
| TGME49_211600 | p.Gln1970His | missense_variant                               | hypothetical protein |
| TGME49_211460 | p.Met610Val  | missense_variant                               | hypothetical protein |
| TGME49_211450 | p.Asn1465Lys | missense_variant                               | hypothetical protein |
| TGME49_211450 | p.Gly1013Arg | missense_variant                               | hypothetical protein |
| TGME49_211450 | p.Thr1006Arg | missense_variant                               | hypothetical protein |
| TGME49_211450 | p.Thr1006Ala | missense_variant                               | hypothetical protein |
| TGME49_211450 | p.Ser222Cys  | missense_variant                               | hypothetical protein |
| TGME49_211450 | p.Asp109Asn  | missense_variant                               | hypothetical protein |
| TGME49_211450 | p.Pro51Ser   | missense_variant                               | hypothetical protein |
| TGME49_211440 | c.-678T>G    | 5_prime_UTR_premature_start_codon_gain_variant | hypothetical protein |
| TGME49_211440 | c.-126T>G    | 5_prime_UTR_premature_start_codon_gain_variant | hypothetical protein |
| TGME49_211440 | p.Gly52Ala   | missense_variant                               | hypothetical protein |
| TGME49_211440 | p.Ser72Trp   | missense_variant                               | hypothetical protein |
| TGME49_211440 | p.Gly85Asp   | missense_variant                               | hypothetical protein |
| TGME49_211440 | p.Leu203Phe  | missense_variant                               | hypothetical protein |
| TGME49_211440 | p.Gly281Ser  | missense_variant                               | hypothetical protein |
| TGME49_211440 | p.Arg303Lys  | missense_variant                               | hypothetical protein |
| TGME49_211440 | p.Tyr324*    | stop_gained                                    | hypothetical protein |
| TGME49_211440 | p.Ser424Pro  | missense_variant                               | hypothetical protein |
| TGME49_211440 | p.Gly655Asp  | missense_variant                               | hypothetical protein |
| TGME49_211440 | p.Ser1041Gly | missense_variant                               | hypothetical protein |
| TGME49_211440 | p.His1407Arg | missense_variant                               | hypothetical protein |
| TGME49_211440 | p.Ser1567Thr | missense_variant                               | hypothetical protein |
| TGME49_211440 | p.Val1590Ala | missense_variant                               | hypothetical protein |
| TGME49_211390 | p.Leu251Ile  | missense_variant                               | hypothetical protein |
| TGME49_211380 | p.Val74Phe   | missense_variant                               | hypothetical protein |
| TGME49_211380 | p.Asn208Thr  | missense_variant                               | hypothetical protein |
| TGME49_211340 | p.Ala2122Thr | missense_variant                               | hypothetical protein |
| TGME49_211340 | p.Val2074Leu | missense_variant                               | hypothetical protein |
| TGME49_211340 | p.Ala2051Thr | missense_variant                               | hypothetical protein |
| TGME49_211340 | p.Gly2027Val | missense_variant                               | hypothetical protein |
| TGME49_211340 | p.Lys1999Glu | missense_variant                               | hypothetical protein |
| TGME49_211340 | p.Val1895Phe | missense_variant                               | hypothetical protein |
| TGME49_211340 | p.Pro1788Ser | missense_variant                               | hypothetical protein |
| TGME49_211340 | p.Met1781Val | missense_variant                               | hypothetical protein |
| TGME49_211340 | p.Thr1762Ala | missense_variant                               | hypothetical protein |
| TGME49_211340 | p.Gly1655Ser | missense_variant                               | hypothetical protein |
| TGME49_211340 | p.Arg1546Lys | missense_variant                               | hypothetical protein |
| TGME49_211340 | p.Ser1536Asn | missense_variant                               | hypothetical protein |
| TGME49_211340 | p.Leu1489Ile | missense_variant                               | hypothetical protein |
| TGME49_211340 | p.Ala1317Glu | missense_variant                               | hypothetical protein |
| TGME49_211340 | p.Tyr1286His | missense_variant                               | hypothetical protein |
| TGME49_211340 | p.Met1142Ile | missense_variant                               | hypothetical protein |
| TGME49_211340 | p.Ala1120Pro | missense_variant                               | hypothetical protein |
| TGME49_211340 | p.Gly902Asp  | missense_variant                               | hypothetical protein |
| TGME49_211340 | p.Ala496Val  | missense_variant                               | hypothetical protein |
| TGME49_211340 | p.Arg243Pro  | missense_variant                               | hypothetical protein |
| TGME49_211340 | p.Glu188Val  | missense_variant                               | hypothetical protein |
| TGME49_211340 | c.-138C>T    | 5_prime_UTR_premature_start_codon_gain_variant | hypothetical protein |
| TGME49_211320 | p.Pro317Leu  | missense_variant                               | hypothetical protein |
| TGME49_211310 | p.Cys165Ser  | missense_variant                               | hypothetical protein |
| TGME49_211310 | p.Leu181Met  | missense_variant                               | hypothetical protein |
| TGME49_211310 | p.Asp483Asn  | missense_variant                               | hypothetical protein |
| TGME49_211310 | p.Gly486Glu  | missense_variant                               | hypothetical protein |
| TGME49_211310 | p.Ile640Val  | missense_variant                               | hypothetical protein |
| TGME49_211310 | p.Ser655Leu  | missense_variant                               | hypothetical protein |
| TGME49_211310 | p.Ala1167Ser | missense_variant                               | hypothetical protein |
| TGME49_211310 | p.Arg1244Lys | missense_variant                               | hypothetical protein |
| TGME49_211310 | p.Glu1590Ala | missense_variant                               | hypothetical protein |
| TGME49_211310 | p.Met1690Thr | missense_variant                               | hypothetical protein |
| TGME49_211310 | p.Glu1795Gly | missense_variant                               | hypothetical protein |
| TGME49_211310 | p.Lys1994Arg | missense_variant                               | hypothetical protein |
| TGME49_211310 | p.Phe2210Ser | missense_variant                               | hypothetical protein |
| TGME49_211280 | p.Thr58Ile   | missense_variant                               | hypothetical protein |

|               |              |                                                |                      |
|---------------|--------------|------------------------------------------------|----------------------|
| TGME49_211280 | p.Leu60Ile   | missense_variant                               | hypothetical protein |
| TGME49_211280 | p.Glu834Lys  | missense_variant                               | hypothetical protein |
| TGME49_211280 | p.Glu836Asp  | missense_variant                               | hypothetical protein |
| TGME49_211250 | c.80-7G>T    | splice_region_variant                          | hypothetical protein |
| TGME49_211220 | p.Leu727His  | missense_variant                               | hypothetical protein |
| TGME49_211220 | p.Arg671Gly  | missense_variant                               | hypothetical protein |
| TGME49_211220 | p.Lys228Asn  | missense_variant                               | hypothetical protein |
| TGME49_211220 | p.Pro41Leu   | missense_variant                               | hypothetical protein |
| TGME49_211220 | c.-1045C>T   | 5_prime_UTR_premature_start_codon_gain_variant | hypothetical protein |
| TGME49_211150 | p.Ala2347Thr | missense_variant                               | hypothetical protein |
| TGME49_211150 | p.Gly2282Arg | missense_variant                               | hypothetical protein |
| TGME49_211150 | p.Phe2191Tyr | missense_variant                               | hypothetical protein |
| TGME49_211150 | p.Arg1950Gly | missense_variant                               | hypothetical protein |
| TGME49_211150 | p.Glu1816Gly | missense_variant                               | hypothetical protein |
| TGME49_211150 | p.Val1449Met | missense_variant                               | hypothetical protein |
| TGME49_211150 | p.Ala1371Gly | missense_variant                               | hypothetical protein |
| TGME49_211150 | p.Ala423Ser  | missense_variant                               | hypothetical protein |
| TGME49_211080 | p.Ser83Ala   | missense_variant                               | hypothetical protein |
| TGME49_211070 | p.Ser117Leu  | missense_variant                               | hypothetical protein |
| TGME49_211070 | p.Val120Ala  | missense_variant                               | hypothetical protein |
| TGME49_211015 | p.Leu149Phe  | missense_variant                               | hypothetical protein |
| TGME49_211015 | p.Pro98Arg   | missense_variant                               | hypothetical protein |
| TGME49_211015 | p.Lys78Glu   | missense_variant                               | hypothetical protein |
| TGME49_211015 | p.Ser4Pro    | missense_variant                               | hypothetical protein |
| TGME49_211010 | p.Asp200Tyr  | missense_variant                               | hypothetical protein |
| TGME49_211010 | p.Glu484Asp  | missense_variant                               | hypothetical protein |
| TGME49_211010 | p.Glu1023Asp | missense_variant                               | hypothetical protein |
| TGME49_211010 | p.Leu1090Ile | missense_variant                               | hypothetical protein |
| TGME49_211010 | p.Glu1114Asp | missense_variant                               | hypothetical protein |
| TGME49_211010 | p.Glu1132Ala | missense_variant                               | hypothetical protein |
| TGME49_211010 | p.Glu1209Asp | missense_variant                               | hypothetical protein |
| TGME49_211010 | p.Asn1312Lys | missense_variant                               | hypothetical protein |
| TGME49_211010 | p.Leu1386Ile | missense_variant                               | hypothetical protein |
| TGME49_211010 | p.Phe1700Leu | missense_variant                               | hypothetical protein |
| TGME49_211010 | c.*620T>C    | splice_region_variant                          | hypothetical protein |
| TGME49_211000 | p.Asp442Gly  | missense_variant                               | hypothetical protein |
| TGME49_211000 | p.Leu127Ile  | missense_variant                               | hypothetical protein |
| TGME49_210990 | p.Ser416Phe  | missense_variant                               | hypothetical protein |
| TGME49_210975 | p.Arg34His   | missense_variant                               | hypothetical protein |
| TGME49_210975 | p.Gly35Glu   | missense_variant                               | hypothetical protein |
| TGME49_210975 | p.His103Tyr  | missense_variant                               | hypothetical protein |
| TGME49_210975 | p.Ala172Val  | missense_variant                               | hypothetical protein |
| TGME49_210975 | p.Arg226His  | missense_variant                               | hypothetical protein |
| TGME49_210975 | p.Phe245Cys  | missense_variant                               | hypothetical protein |
| TGME49_210970 | p.Pro7Arg    | missense_variant                               | hypothetical protein |
| TGME49_210970 | p.Gln62Leu   | missense_variant                               | hypothetical protein |
| TGME49_210820 | p.Ser756Arg  | missense_variant                               | hypothetical protein |
| TGME49_210820 | p.Leu340Arg  | missense_variant                               | hypothetical protein |
| TGME49_210820 | p.Pro43Ser   | missense_variant                               | hypothetical protein |
| TGME49_210820 | c.-216C>T    | 5_prime_UTR_premature_start_codon_gain_variant | hypothetical protein |
| TGME49_210820 | c.-593C>T    | 5_prime_UTR_premature_start_codon_gain_variant | hypothetical protein |
| TGME49_210815 | p.Thr92Ala   | missense_variant                               | hypothetical protein |
| TGME49_210810 | c.261+6T>C   | splice_region_variant                          | hypothetical protein |
| TGME49_210783 | p.Arg74Gln   | missense_variant                               | hypothetical protein |
| TGME49_210770 | p.Arg35Met   | missense_variant                               | hypothetical protein |
| TGME49_210700 | p.Gly747Glu  | missense_variant                               | hypothetical protein |
| TGME49_210700 | p.Arg1462Cys | missense_variant                               | hypothetical protein |
| TGME49_210700 | p.Gly1466Cys | missense_variant                               | hypothetical protein |
| TGME49_210700 | p.Gln1668Glu | missense_variant                               | hypothetical protein |
| TGME49_210700 | p.Ser1839Pro | missense_variant                               | hypothetical protein |
| TGME49_210700 | p.Leu1926Met | missense_variant                               | hypothetical protein |
| TGME49_210700 | p.Glu1934Asp | missense_variant                               | hypothetical protein |
| TGME49_210700 | p.Ala1981Pro | missense_variant                               | hypothetical protein |
| TGME49_210700 | p.Arg2087Gly | missense_variant                               | hypothetical protein |
| TGME49_210700 | p.Glu2110Gly | missense_variant                               | hypothetical protein |
| TGME49_210700 | p.Val2692Phe | missense_variant                               | hypothetical protein |
| TGME49_210700 | p.Arg2883Gly | missense_variant                               | hypothetical protein |
| TGME49_210700 | p.Arg3006His | missense_variant                               | hypothetical protein |
| TGME49_210700 | p.Pro3123Ser | missense_variant                               | hypothetical protein |
| TGME49_210700 | p.Pro3531Arg | missense_variant                               | hypothetical protein |
| TGME49_210700 | p.Asp3656Asn | missense_variant                               | hypothetical protein |
| TGME49_210700 | p.Lys3682Thr | missense_variant                               | hypothetical protein |
| TGME49_210700 | p.Thr3995Arg | missense_variant                               | hypothetical protein |
| TGME49_210700 | p.Ser4345Pro | missense_variant                               | hypothetical protein |
| TGME49_210700 | p.Val4366Ala | missense_variant                               | hypothetical protein |
| TGME49_210700 | p.Val4692Ala | missense_variant                               | hypothetical protein |
| TGME49_210700 | p.Gly5171Ser | missense_variant                               | hypothetical protein |
| TGME49_210700 | p.Pro5500Leu | missense_variant                               | hypothetical protein |
| TGME49_210700 | p.Thr6174Ala | missense_variant                               | hypothetical protein |
| TGME49_210700 | p.Arg6344Cys | missense_variant                               | hypothetical protein |
| TGME49_210700 | p.Met6451Thr | missense_variant                               | hypothetical protein |
| TGME49_210700 | p.Gly6932Arg | missense_variant                               | hypothetical protein |
| TGME49_210700 | p.Arg7346Gln | missense_variant                               | hypothetical protein |
| TGME49_210700 | p.Ala7574Pro | missense_variant                               | hypothetical protein |
| TGME49_210700 | p.Thr7988Ser | missense_variant                               | hypothetical protein |

|               |              |                                                |                      |
|---------------|--------------|------------------------------------------------|----------------------|
| TGME49_301190 | p.Asn69Thr   | missense_variant                               | hypothetical protein |
| TGME49_301200 | p.Glu339Lys  | missense_variant                               | hypothetical protein |
| TGME49_301200 | p.Gly319Ser  | missense_variant                               | hypothetical protein |
| TGME49_301200 | p.Leu316Val  | missense_variant                               | hypothetical protein |
| TGME49_301200 | p.His312Asp  | missense_variant                               | hypothetical protein |
| TGME49_301200 | p.Gly305Arg  | missense_variant                               | hypothetical protein |
| TGME49_301200 | p.Leu240Ile  | missense_variant                               | hypothetical protein |
| TGME49_301200 | p.Thr239Ala  | missense_variant                               | hypothetical protein |
| TGME49_301200 | p.Thr219Ala  | missense_variant                               | hypothetical protein |
| TGME49_301200 | p.Ile203Arg  | missense_variant                               | hypothetical protein |
| TGME49_301200 | p.Pro200Ser  | missense_variant                               | hypothetical protein |
| TGME49_301200 | p.Leu196His  | missense_variant                               | hypothetical protein |
| TGME49_301200 | p.Ser195Cys  | missense_variant                               | hypothetical protein |
| TGME49_301200 | c.542-8T>G   | splice_region_variant                          | hypothetical protein |
| TGME49_301200 | c.541+5G>T   | splice_region_variant                          | hypothetical protein |
| TGME49_301200 | p.Pro151Thr  | missense_variant                               | hypothetical protein |
| TGME49_301200 | p.Pro141Thr  | missense_variant                               | hypothetical protein |
| TGME49_301200 | p.Gly135Glu  | missense_variant                               | hypothetical protein |
| TGME49_301200 | p.Ile125Val  | missense_variant                               | hypothetical protein |
| TGME49_301200 | p.His116Gln  | missense_variant                               | hypothetical protein |
| TGME49_301200 | p.Glu101Lys  | missense_variant                               | hypothetical protein |
| TGME49_301200 | p.Arg82Leu   | missense_variant                               | hypothetical protein |
| TGME49_301200 | p.Arg81His   | missense_variant                               | hypothetical protein |
| TGME49_301200 | p.Cys78Gly   | missense_variant                               | hypothetical protein |
| TGME49_301200 | p.Pro46Ala   | missense_variant                               | hypothetical protein |
| TGME49_301200 | p.Tyr41Cys   | missense_variant                               | hypothetical protein |
| TGME49_301200 | p.Asn23Ser   | missense_variant                               | hypothetical protein |
| TGME49_301200 | p.Lys19Thr   | missense_variant                               | hypothetical protein |
| TGME49_301240 | c.-634C>T    | 5_prime_UTR_premature_start_codon_gain_variant | hypothetical protein |
| TGME49_301250 | p.Met188Val  | missense_variant                               | hypothetical protein |
| TGME49_301250 | p.Asp426Glu  | missense_variant                               | hypothetical protein |
| TGME49_301280 | p.Phe194Leu  | missense_variant                               | hypothetical protein |
| TGME49_301280 | p.Asn150His  | missense_variant                               | hypothetical protein |
| TGME49_301280 | p.Arg136Gly  | missense_variant                               | hypothetical protein |
| TGME49_301280 | p.Lys96Arg   | missense_variant                               | hypothetical protein |
| TGME49_301280 | p.Arg7Gln    | missense_variant                               | hypothetical protein |
| TGME49_301290 | p.Arg591Lys  | missense_variant                               | hypothetical protein |
| TGME49_301290 | p.Arg524Gly  | missense_variant                               | hypothetical protein |
| TGME49_301290 | p.Glu481Gln  | missense_variant                               | hypothetical protein |
| TGME49_301290 | p.Glu298Gly  | missense_variant                               | hypothetical protein |
| TGME49_301290 | p.Ser278Thr  | missense_variant                               | hypothetical protein |
| TGME49_301290 | p.Met186Ile  | missense_variant                               | hypothetical protein |
| TGME49_301290 | p.Gly141Ala  | missense_variant                               | hypothetical protein |
| TGME49_301290 | p.Ser30Pro   | missense_variant                               | hypothetical protein |
| TGME49_301300 | p.Asp25Asn   | missense_variant                               | hypothetical protein |
| TGME49_301300 | p.Ser87Ala   | missense_variant                               | hypothetical protein |
| TGME49_301300 | p.Thr112Ala  | missense_variant                               | hypothetical protein |
| TGME49_301300 | p.Gly180Glu  | missense_variant                               | hypothetical protein |
| TGME49_301310 | p.Asn168Ser  | missense_variant                               | hypothetical protein |
| TGME49_301310 | p.Ser25Pro   | missense_variant                               | hypothetical protein |
| TGME49_301310 | c.-278G>T    | 5_prime_UTR_premature_start_codon_gain_variant | hypothetical protein |
| TGME49_301310 | c.-596C>T    | 5_prime_UTR_premature_start_codon_gain_variant | hypothetical protein |
| TGME49_301310 | c.-669C>T    | 5_prime_UTR_premature_start_codon_gain_variant | hypothetical protein |
| TGME49_301330 | c.-147G>T    | 5_prime_UTR_premature_start_codon_gain_variant | hypothetical protein |
| TGME49_301355 | p.His26Arg   | missense_variant                               | hypothetical protein |
| TGME49_301400 | p.Glu2060Ala | missense_variant                               | hypothetical protein |
| TGME49_301400 | p.Gln1828Glu | missense_variant                               | hypothetical protein |
| TGME49_301400 | p.Asp1616Val | missense_variant                               | hypothetical protein |
| TGME49_301400 | p.Glu1302Lys | missense_variant                               | hypothetical protein |
| TGME49_301400 | p.Arg1294Pro | missense_variant                               | hypothetical protein |
| TGME49_301400 | p.Gln1256Glu | missense_variant                               | hypothetical protein |
| TGME49_301400 | p.Gly1248Ala | missense_variant                               | hypothetical protein |
| TGME49_301400 | p.His642Asn  | missense_variant                               | hypothetical protein |
| TGME49_301400 | p.His519Tyr  | missense_variant                               | hypothetical protein |
| TGME49_301400 | c.-2841A>T   | 5_prime_UTR_premature_start_codon_gain_variant | hypothetical protein |
| TGME49_301400 | c.-3328C>G   | 5_prime_UTR_premature_start_codon_gain_variant | hypothetical protein |
| TGME49_301400 | c.-3826A>G   | 5_prime_UTR_premature_start_codon_gain_variant | hypothetical protein |
| TGME49_301410 | p.Asn727Ser  | missense_variant                               | hypothetical protein |
| TGME49_301415 | p.Asn3Ser    | missense_variant                               | hypothetical protein |
| TGME49_301420 | c.-915A>C    | 5_prime_UTR_premature_start_codon_gain_variant | hypothetical protein |
| TGME49_301460 | c.1422+4A>G  | splice_region_variant                          | hypothetical protein |
| TGME49_301460 | p.Arg348Lys  | missense_variant                               | hypothetical protein |
| TGME49_301470 | p.Val387Leu  | missense_variant                               | hypothetical protein |
| TGME49_301690 | p.Asp54Glu   | missense_variant                               | hypothetical protein |
| TGME49_301690 | p.Lys175Thr  | missense_variant                               | hypothetical protein |
| TGME49_301690 | p.Asn182Lys  | missense_variant                               | hypothetical protein |
| TGME49_301690 | p.Val213Ala  | missense_variant                               | hypothetical protein |
| TGME49_301690 | p.Ile285Met  | missense_variant                               | hypothetical protein |
| TGME49_301690 | p.Asn356Ser  | missense_variant                               | hypothetical protein |
| TGME49_301690 | p.Glu387Gln  | missense_variant                               | hypothetical protein |
| TGME49_237835 | p.Arg83Thr   | missense_variant                               | hypothetical protein |
| TGME49_237840 | p.Ser156Thr  | missense_variant                               | hypothetical protein |
| TGME49_237840 | p.Arg163Thr  | missense_variant                               | hypothetical protein |
| TGME49_237840 | p.Ser325Thr  | missense_variant                               | hypothetical protein |
| TGME49_237840 | p.Ala438Pro  | missense_variant                               | hypothetical protein |

|               |              |                                                |                      |
|---------------|--------------|------------------------------------------------|----------------------|
| TGME49_237840 | p.Met1001Ile | missense_variant                               | hypothetical protein |
| TGME49_237840 | p.Ala1004Pro | missense_variant                               | hypothetical protein |
| TGME49_238020 | p.Pro697Ser  | missense_variant                               | hypothetical protein |
| TGME49_238140 | c.1307-4G>T  | splice_region_variant                          | hypothetical protein |
| TGME49_238140 | p.Ser217Phe  | missense_variant                               | hypothetical protein |
| TGME49_238160 | p.Leu142Ile  | missense_variant                               | hypothetical protein |
| TGME49_238165 | c.171+8C>A   | splice_region_variant                          | hypothetical protein |
| TGME49_238170 | c.-343C>A    | 5_prime_UTR_premature_start_codon_gain_variant | hypothetical protein |
| TGME49_238170 | p.Leu186Arg  | missense_variant                               | hypothetical protein |
| TGME49_238170 | p.Ser432Asn  | missense_variant                               | hypothetical protein |
| TGME49_238170 | c.2565+7C>G  | splice_region_variant                          | hypothetical protein |
| TGME49_238170 | p.Ala953Ser  | missense_variant                               | hypothetical protein |
| TGME49_238170 | p.Thr1408Ser | missense_variant                               | hypothetical protein |
| TGME49_238260 | p.Ala51Ser   | missense_variant                               | hypothetical protein |
| TGME49_238270 | c.-377C>T    | 5_prime_UTR_premature_start_codon_gain_variant | hypothetical protein |
| TGME49_238270 | c.-653A>T    | 5_prime_UTR_premature_start_codon_gain_variant | hypothetical protein |
| TGME49_238390 | c.-1578T>G   | 5_prime_UTR_premature_start_codon_gain_variant | hypothetical protein |
| TGME49_238390 | p.Thr539Ser  | missense_variant                               | hypothetical protein |
| TGME49_238390 | p.Arg570His  | missense_variant                               | hypothetical protein |
| TGME49_238390 | p.Ala577Gly  | missense_variant                               | hypothetical protein |
| TGME49_238390 | p.Arg675Thr  | missense_variant                               | hypothetical protein |
| TGME49_238390 | p.Arg853His  | missense_variant                               | hypothetical protein |
| TGME49_238390 | p.Gly1116Asp | missense_variant                               | hypothetical protein |
| TGME49_238390 | p.Arg1395His | missense_variant                               | hypothetical protein |
| TGME49_238390 | p.Pro1625Ala | missense_variant                               | hypothetical protein |
| TGME49_238410 | c.-407C>T    | 5_prime_UTR_premature_start_codon_gain_variant | hypothetical protein |
| TGME49_238410 | p.Leu11Ile   | missense_variant                               | hypothetical protein |
| TGME49_238410 | p.Asp20Gly   | missense_variant                               | hypothetical protein |
| TGME49_238410 | p.Ser24Phe   | missense_variant                               | hypothetical protein |
| TGME49_238410 | p.Arg104Lys  | missense_variant                               | hypothetical protein |
| TGME49_238410 | p.Glu212Lys  | missense_variant                               | hypothetical protein |
| TGME49_238410 | p.Gln282Glu  | missense_variant                               | hypothetical protein |
| TGME49_238410 | p.Asp465Val  | missense_variant                               | hypothetical protein |
| TGME49_238410 | p.Glu723Gln  | missense_variant                               | hypothetical protein |
| TGME49_238410 | p.Glu869Gly  | missense_variant                               | hypothetical protein |
| TGME49_238410 | p.Pro912Arg  | missense_variant                               | hypothetical protein |
| TGME49_238410 | p.Pro1119Arg | missense_variant                               | hypothetical protein |
| TGME49_238410 | p.Glu1239Gly | missense_variant                               | hypothetical protein |
| TGME49_238410 | p.Arg1331Lys | missense_variant                               | hypothetical protein |
| TGME49_238420 | c.-1254A>G   | 5_prime_UTR_premature_start_codon_gain_variant | hypothetical protein |
| TGME49_238420 | p.Val288Ile  | missense_variant                               | hypothetical protein |
| TGME49_238420 | p.Pro706Thr  | missense_variant                               | hypothetical protein |
| TGME49_238420 | p.Pro706Leu  | missense_variant                               | hypothetical protein |
| TGME49_238420 | p.Glu731Gly  | missense_variant                               | hypothetical protein |
| TGME49_238420 | p.Val735Asp  | missense_variant                               | hypothetical protein |
| TGME49_238420 | p.Lys768Asn  | missense_variant                               | hypothetical protein |
| TGME49_238420 | p.Arg824His  | missense_variant                               | hypothetical protein |
| TGME49_238420 | p.Gly1034Ala | missense_variant                               | hypothetical protein |
| TGME49_238510 | p.Gln698Arg  | missense_variant                               | hypothetical protein |
| TGME49_238870 | c.-1351C>T   | 5_prime_UTR_premature_start_codon_gain_variant | hypothetical protein |
| TGME49_238870 | p.Ala363Thr  | missense_variant                               | hypothetical protein |
| TGME49_238880 | p.Glu112Lys  | missense_variant                               | hypothetical protein |
| TGME49_238880 | p.Ser1500Arg | missense_variant                               | hypothetical protein |
| TGME49_238880 | p.Arg1519Met | missense_variant                               | hypothetical protein |
| TGME49_238880 | p.Ala1713Thr | missense_variant                               | hypothetical protein |
| TGME49_238880 | p.Asp2215Asn | missense_variant                               | hypothetical protein |
| TGME49_238880 | p.Ile2596Val | missense_variant                               | hypothetical protein |
| TGME49_238880 | p.Pro2616Ser | missense_variant                               | hypothetical protein |
| TGME49_238880 | p.Glu2626Asp | missense_variant                               | hypothetical protein |
| TGME49_238880 | p.Thr2785Met | missense_variant                               | hypothetical protein |
| TGME49_238880 | p.Gln2862His | missense_variant                               | hypothetical protein |
| TGME49_238880 | p.Gly2951Asp | missense_variant                               | hypothetical protein |
| TGME49_238880 | p.Arg3021Leu | missense_variant                               | hypothetical protein |
| TGME49_238880 | p.Pro3078Arg | missense_variant                               | hypothetical protein |
| TGME49_238895 | p.Val1308Gly | missense_variant                               | hypothetical protein |
| TGME49_238895 | p.Gln29His   | missense_variant                               | hypothetical protein |
| TGME49_238930 | p.Glu1434Gln | missense_variant                               | hypothetical protein |
| TGME49_238930 | p.Arg844Lys  | missense_variant                               | hypothetical protein |
| TGME49_238930 | p.Thr831Ala  | missense_variant                               | hypothetical protein |
| TGME49_238930 | p.Lys615Asn  | missense_variant                               | hypothetical protein |
| TGME49_238930 | p.Lys486Ile  | missense_variant                               | hypothetical protein |
| TGME49_238930 | p.Gln483His  | missense_variant                               | hypothetical protein |
| TGME49_238930 | p.Pro295Ser  | missense_variant                               | hypothetical protein |
| TGME49_238930 | p.Gly283Arg  | missense_variant                               | hypothetical protein |
| TGME49_238930 | p.Asp282Gly  | missense_variant                               | hypothetical protein |
| TGME49_238930 | p.Leu213Phe  | missense_variant                               | hypothetical protein |
| TGME49_238970 | p.Gln152His  | missense_variant                               | hypothetical protein |
| TGME49_238970 | p.Pro791Leu  | missense_variant                               | hypothetical protein |
| TGME49_238970 | p.Ser852Arg  | missense_variant                               | hypothetical protein |
| TGME49_238970 | p.Ser852Thr  | missense_variant                               | hypothetical protein |
| TGME49_238970 | p.Leu1165Val | missense_variant                               | hypothetical protein |
| TGME49_238970 | p.Val1169Ala | missense_variant                               | hypothetical protein |
| TGME49_238970 | p.Glu1213Gln | missense_variant                               | hypothetical protein |
| TGME49_238970 | p.Ile1287Asn | missense_variant                               | hypothetical protein |
| TGME49_238970 | p.Gln1303Arg | missense_variant                               | hypothetical protein |

|               |              |                                                |                      |
|---------------|--------------|------------------------------------------------|----------------------|
| TGME49_238970 | p.Asp1401Glu | missense_variant                               | hypothetical protein |
| TGME49_238970 | p.Lys2037Glu | missense_variant                               | hypothetical protein |
| TGME49_238970 | p.His2157Tyr | missense_variant                               | hypothetical protein |
| TGME49_238970 | p.Pro2235Ser | missense_variant                               | hypothetical protein |
| TGME49_238970 | p.Lys2355Arg | missense_variant                               | hypothetical protein |
| TGME49_238970 | p.Lys2506Arg | missense_variant                               | hypothetical protein |
| TGME49_238980 | p.Cys69Tyr   | missense_variant                               | hypothetical protein |
| TGME49_238980 | p.Gln413Glu  | missense_variant                               | hypothetical protein |
| TGME49_238980 | p.Lys844Thr  | missense_variant                               | hypothetical protein |
| TGME49_238980 | p.Glu885Lys  | missense_variant                               | hypothetical protein |
| TGME49_239010 | p.Leu106Gln  | missense_variant                               | hypothetical protein |
| TGME49_239050 | c.-616C>G    | 5_prime_UTR_premature_start_codon_gain_variant | hypothetical protein |
| TGME49_239050 | p.Gly110Glu  | missense_variant                               | hypothetical protein |
| TGME49_239050 | p.Glu114Gly  | missense_variant                               | hypothetical protein |
| TGME49_239050 | c.915-6G>T   | splice_region_variant                          | hypothetical protein |
| TGME49_239050 | p.Lys587Glu  | missense_variant                               | hypothetical protein |
| TGME49_239050 | p.Gly605Ser  | missense_variant                               | hypothetical protein |
| TGME49_239070 | p.Leu496Val  | missense_variant                               | hypothetical protein |
| TGME49_239070 | p.Leu174Val  | missense_variant                               | hypothetical protein |
| TGME49_239120 | c.-340G>A    | 5_prime_UTR_premature_start_codon_gain_variant | hypothetical protein |
| TGME49_239120 | p.Pro14Ser   | missense_variant                               | hypothetical protein |
| TGME49_239270 | p.Ala314Ser  | missense_variant                               | hypothetical protein |
| TGME49_239270 | p.Lys276Arg  | missense_variant                               | hypothetical protein |
| TGME49_239270 | p.Asn164Thr  | missense_variant                               | hypothetical protein |
| TGME49_239270 | p.Arg96Lys   | missense_variant                               | hypothetical protein |
| TGME49_239290 | p.Arg1726Thr | missense_variant                               | hypothetical protein |
| TGME49_239290 | p.Thr1704Pro | missense_variant                               | hypothetical protein |
| TGME49_239290 | p.Lys1611Arg | missense_variant                               | hypothetical protein |
| TGME49_239290 | p.Lys1610Glu | missense_variant                               | hypothetical protein |
| TGME49_239290 | p.Leu1600Pro | missense_variant                               | hypothetical protein |
| TGME49_239290 | p.His1391Gln | missense_variant                               | hypothetical protein |
| TGME49_239290 | p.Ala1379Asp | missense_variant                               | hypothetical protein |
| TGME49_239290 | p.Ala1076Glu | missense_variant                               | hypothetical protein |
| TGME49_239290 | p.Asn967Ile  | missense_variant                               | hypothetical protein |
| TGME49_239290 | p.Gly393Cys  | missense_variant                               | hypothetical protein |
| TGME49_239290 | p.Gln137Glu  | missense_variant                               | hypothetical protein |
| TGME49_239300 | c.-371C>A    | 5_prime_UTR_premature_start_codon_gain_variant | hypothetical protein |
| TGME49_239300 | c.1332+6C>T  | splice_region_variant                          | hypothetical protein |
| TGME49_239340 | c.-440T>G    | 5_prime_UTR_premature_start_codon_gain_variant | hypothetical protein |
| TGME49_239340 | p.Ala274Val  | missense_variant                               | hypothetical protein |
| TGME49_239340 | p.Ser752Arg  | missense_variant                               | hypothetical protein |
| TGME49_239340 | p.Pro785Ser  | missense_variant                               | hypothetical protein |
| TGME49_239340 | p.Ser816Asn  | missense_variant                               | hypothetical protein |
| TGME49_239340 | p.Arg867His  | missense_variant                               | hypothetical protein |
| TGME49_239340 | p.Pro898Leu  | missense_variant                               | hypothetical protein |
| TGME49_239340 | p.Glu902Asp  | missense_variant                               | hypothetical protein |
| TGME49_239340 | p.Ala1027Gly | missense_variant                               | hypothetical protein |
| TGME49_239340 | p.Ala1226Thr | missense_variant                               | hypothetical protein |
| TGME49_239340 | p.Pro1500Ala | missense_variant                               | hypothetical protein |
| TGME49_239340 | p.Met1671Thr | missense_variant                               | hypothetical protein |
| TGME49_239365 | p.Glu236Gly  | missense_variant                               | hypothetical protein |
| TGME49_239365 | p.Arg52His   | missense_variant                               | hypothetical protein |
| TGME49_239885 | p.Arg5982Thr | missense_variant                               | hypothetical protein |
| TGME49_239885 | p.Ser5961Leu | missense_variant                               | hypothetical protein |
| TGME49_239885 | p.Lys5932Thr | missense_variant                               | hypothetical protein |
| TGME49_239885 | p.Pro5929Arg | missense_variant                               | hypothetical protein |
| TGME49_239885 | p.Ala5923Thr | missense_variant                               | hypothetical protein |
| TGME49_239885 | p.His5882Arg | missense_variant                               | hypothetical protein |
| TGME49_239885 | p.Ala5732Thr | missense_variant                               | hypothetical protein |
| TGME49_239885 | p.Gln5696Glu | missense_variant                               | hypothetical protein |
| TGME49_239885 | p.Val5680Ala | missense_variant                               | hypothetical protein |
| TGME49_239885 | p.Val5680Met | missense_variant                               | hypothetical protein |
| TGME49_239885 | p.Gly5450Arg | missense_variant                               | hypothetical protein |
| TGME49_239885 | p.Glu5271Asp | missense_variant                               | hypothetical protein |
| TGME49_239885 | p.Glu5257Ala | missense_variant                               | hypothetical protein |
| TGME49_239885 | p.Ser5256Asn | missense_variant                               | hypothetical protein |
| TGME49_239885 | p.Glu5253Gly | missense_variant                               | hypothetical protein |
| TGME49_239885 | p.Glu5106Val | missense_variant                               | hypothetical protein |
| TGME49_239885 | p.Arg5053Gln | missense_variant                               | hypothetical protein |
| TGME49_239885 | p.Arg4936Pro | missense_variant                               | hypothetical protein |
| TGME49_239885 | p.Arg4722Gln | missense_variant                               | hypothetical protein |
| TGME49_239885 | p.Gln4662Arg | missense_variant                               | hypothetical protein |
| TGME49_239885 | p.Gly4508Ser | missense_variant                               | hypothetical protein |
| TGME49_239885 | p.Ser4488Gly | missense_variant                               | hypothetical protein |
| TGME49_239885 | p.Phe4252Tyr | missense_variant                               | hypothetical protein |
| TGME49_239885 | p.Glu4078Lys | missense_variant                               | hypothetical protein |
| TGME49_239885 | p.Cys4020Trp | missense_variant                               | hypothetical protein |
| TGME49_239885 | p.Tyr3850Cys | missense_variant                               | hypothetical protein |
| TGME49_239885 | p.Val3814Ile | missense_variant                               | hypothetical protein |
| TGME49_239885 | p.Arg3813Gly | missense_variant                               | hypothetical protein |
| TGME49_239885 | p.Thr3805Pro | missense_variant                               | hypothetical protein |
| TGME49_239885 | p.Arg3675Thr | missense_variant                               | hypothetical protein |
| TGME49_239885 | p.Gly3651Arg | missense_variant                               | hypothetical protein |
| TGME49_239885 | p.Arg3612Pro | missense_variant                               | hypothetical protein |
| TGME49_239885 | p.Cys3482Arg | missense_variant                               | hypothetical protein |

|               |              |                                                |                      |
|---------------|--------------|------------------------------------------------|----------------------|
| TGME49_239885 | p.Glu3370*   | stop_gained                                    | hypothetical protein |
| TGME49_239885 | p.Arg3096Trp | missense_variant                               | hypothetical protein |
| TGME49_239885 | p.Glu3035Lys | missense_variant                               | hypothetical protein |
| TGME49_239885 | p.Gln2948Lys | missense_variant                               | hypothetical protein |
| TGME49_239885 | p.Thr2652Ser | missense_variant                               | hypothetical protein |
| TGME49_239885 | p.Thr2608Ser | missense_variant                               | hypothetical protein |
| TGME49_239885 | p.Pro2516Ser | missense_variant                               | hypothetical protein |
| TGME49_239885 | p.Cys227Trp  | missense_variant                               | hypothetical protein |
| TGME49_239885 | p.Pro1916Ala | missense_variant                               | hypothetical protein |
| TGME49_239885 | p.Glu1830Asp | missense_variant                               | hypothetical protein |
| TGME49_239885 | p.Asp1820Asn | missense_variant                               | hypothetical protein |
| TGME49_239885 | p.Glu1681Gln | missense_variant                               | hypothetical protein |
| TGME49_239885 | p.Gly1620Arg | missense_variant                               | hypothetical protein |
| TGME49_239885 | p.Glu1617Gly | missense_variant                               | hypothetical protein |
| TGME49_239885 | p.Ala1569Ser | missense_variant                               | hypothetical protein |
| TGME49_239885 | p.Thr1336Arg | missense_variant                               | hypothetical protein |
| TGME49_239885 | p.His1144Pro | missense_variant                               | hypothetical protein |
| TGME49_239885 | p.Ser1070Ala | missense_variant                               | hypothetical protein |
| TGME49_239885 | p.Val1030Ala | missense_variant                               | hypothetical protein |
| TGME49_239885 | p.Arg976Gly  | missense_variant                               | hypothetical protein |
| TGME49_239885 | p.Gly934Arg  | missense_variant                               | hypothetical protein |
| TGME49_239885 | p.Arg484Lys  | missense_variant                               | hypothetical protein |
| TGME49_239885 | p.Val460Leu  | missense_variant                               | hypothetical protein |
| TGME49_239885 | p.Cys357Phe  | missense_variant                               | hypothetical protein |
| TGME49_239885 | p.Thr327Ile  | missense_variant                               | hypothetical protein |
| TGME49_239885 | p.Pro324Arg  | missense_variant                               | hypothetical protein |
| TGME49_239885 | p.Glu206Asp  | missense_variant                               | hypothetical protein |
| TGME49_239885 | p.Lys82Asn   | missense_variant                               | hypothetical protein |
| TGME49_239885 | p.Ala43Ser   | missense_variant                               | hypothetical protein |
| TGME49_239400 | c.-215C>T    | 5_prime_UTR_premature_start_codon_gain_variant | hypothetical protein |
| TGME49_239400 | c.-38C>T     | 5_prime_UTR_premature_start_codon_gain_variant | hypothetical protein |
| TGME49_239400 | p.His78Gln   | missense_variant                               | hypothetical protein |
| TGME49_239400 | p.Leu301Met  | missense_variant                               | hypothetical protein |
| TGME49_239400 | p.Glu699Gly  | missense_variant                               | hypothetical protein |
| TGME49_239400 | p.His707Arg  | missense_variant                               | hypothetical protein |
| TGME49_239400 | p.Gly880Glu  | missense_variant                               | hypothetical protein |
| TGME49_239400 | p.Pro1106Arg | missense_variant                               | hypothetical protein |
| TGME49_239400 | p.Arg1118Ser | missense_variant                               | hypothetical protein |
| TGME49_239410 | p.Met1377Val | missense_variant                               | hypothetical protein |
| TGME49_239410 | p.Gly1264Ser | missense_variant                               | hypothetical protein |
| TGME49_239410 | p.Ser1037Thr | missense_variant                               | hypothetical protein |
| TGME49_239410 | p.Ala962Thr  | missense_variant                               | hypothetical protein |
| TGME49_239410 | p.Ala942Pro  | missense_variant                               | hypothetical protein |
| TGME49_239410 | p.His923Gln  | missense_variant                               | hypothetical protein |
| TGME49_239410 | p.Ala620Thr  | missense_variant                               | hypothetical protein |
| TGME49_239410 | p.Thr428Ala  | missense_variant                               | hypothetical protein |
| TGME49_239410 | p.Ala254Thr  | missense_variant                               | hypothetical protein |
| TGME49_239475 | p.Ala1861Ser | missense_variant                               | hypothetical protein |
| TGME49_239475 | p.Arg1741Gln | missense_variant                               | hypothetical protein |
| TGME49_239475 | p.Ser1679Cys | missense_variant                               | hypothetical protein |
| TGME49_239475 | p.Pro1492Ala | missense_variant                               | hypothetical protein |
| TGME49_239475 | p.Asp1074Glu | missense_variant                               | hypothetical protein |
| TGME49_239475 | p.Ala823Val  | missense_variant                               | hypothetical protein |
| TGME49_239475 | p.His795Asn  | missense_variant                               | hypothetical protein |
| TGME49_239475 | p.Met682Ile  | missense_variant                               | hypothetical protein |
| TGME49_239475 | p.Gly639Ser  | missense_variant                               | hypothetical protein |
| TGME49_239475 | p.Pro559Thr  | missense_variant                               | hypothetical protein |
| TGME49_239475 | c.-794T>G    | 5_prime_UTR_premature_start_codon_gain_variant | hypothetical protein |
| TGME49_239510 | p.Gln341Glu  | missense_variant                               | hypothetical protein |
| TGME49_239520 | p.Ala274Thr  | missense_variant                               | hypothetical protein |
| TGME49_239570 | p.Leu330Trp  | missense_variant                               | hypothetical protein |
| TGME49_239580 | p.Val403Ala  | missense_variant                               | hypothetical protein |
| TGME49_239580 | p.Asp554His  | missense_variant                               | hypothetical protein |
| TGME49_239580 | p.Pro1027His | missense_variant                               | hypothetical protein |
| TGME49_239580 | p.Leu1405Phe | missense_variant                               | hypothetical protein |
| TGME49_239580 | p.Ser1516Cys | missense_variant                               | hypothetical protein |
| TGME49_239580 | p.Lys2194Thr | missense_variant                               | hypothetical protein |
| TGME49_239610 | c.-1573T>G   | 5_prime_UTR_premature_start_codon_gain_variant | hypothetical protein |
| TGME49_239610 | p.Glu282Lys  | missense_variant                               | hypothetical protein |
| TGME49_239640 | p.Lys5Thr    | missense_variant                               | hypothetical protein |
| TGME49_239640 | p.Ile10Val   | missense_variant                               | hypothetical protein |
| TGME49_239650 | p.Arg352Pro  | missense_variant                               | hypothetical protein |
| TGME49_239650 | p.Gln329Glu  | missense_variant                               | hypothetical protein |
| TGME49_239650 | p.Cys303Gly  | missense_variant                               | hypothetical protein |
| TGME49_239650 | p.Val248Ala  | missense_variant                               | hypothetical protein |
| TGME49_239660 | p.Gly131Ser  | missense_variant                               | hypothetical protein |
| TGME49_239660 | p.Thr130Ser  | missense_variant                               | hypothetical protein |
| TGME49_239670 | p.Ala129Thr  | missense_variant                               | hypothetical protein |
| TGME49_239670 | p.Cys252Ser  | missense_variant                               | hypothetical protein |
| TGME49_239670 | p.Gln297Leu  | missense_variant                               | hypothetical protein |
| TGME49_239670 | p.Gln599Glu  | missense_variant                               | hypothetical protein |
| TGME49_239670 | p.Pro665Ser  | missense_variant                               | hypothetical protein |
| TGME49_239670 | p.Phe734Cys  | missense_variant                               | hypothetical protein |
| TGME49_239670 | p.Val740Ala  | missense_variant                               | hypothetical protein |
| TGME49_239670 | p.Asn783Ser  | missense_variant                               | hypothetical protein |

|               |              |                                                |                      |
|---------------|--------------|------------------------------------------------|----------------------|
| TGME49_239670 | p.Pro837Ser  | missense_variant                               | hypothetical protein |
| TGME49_239748 | c.-1928T>C   | 5_prime_UTR_premature_start_codon_gain_variant | hypothetical protein |
| TGME49_239880 | p.Ser1030Tyr | missense_variant                               | hypothetical protein |
| TGME49_239880 | p.Asp116Asn  | missense_variant                               | hypothetical protein |
| TGME49_240050 | p.Thr319Ser  | missense_variant                               | hypothetical protein |
| TGME49_240050 | p.Glu581Asp  | missense_variant                               | hypothetical protein |
| TGME49_240060 | c.-105C>T    | 5_prime_UTR_premature_start_codon_gain_variant | hypothetical protein |
| TGME49_240060 | p.Lys682Arg  | missense_variant                               | hypothetical protein |
| TGME49_240060 | p.Pro772Ser  | missense_variant                               | hypothetical protein |
| TGME49_240080 | p.Ser1072Phe | missense_variant                               | hypothetical protein |
| TGME49_240080 | p.Arg784Gln  | missense_variant                               | hypothetical protein |
| TGME49_240080 | p.Phe310Cys  | missense_variant                               | hypothetical protein |
| TGME49_240080 | p.Gly162Glu  | missense_variant                               | hypothetical protein |
| TGME49_240080 | p.Ser157Arg  | missense_variant                               | hypothetical protein |
| TGME49_240200 | c.-678C>T    | 5_prime_UTR_premature_start_codon_gain_variant | hypothetical protein |
| TGME49_240200 | p.Ile27Ser   | missense_variant                               | hypothetical protein |
| TGME49_240200 | p.Asp71Ala   | missense_variant&splice_region_variant         | hypothetical protein |
| TGME49_240200 | p.Ser329Leu  | missense_variant                               | hypothetical protein |
| TGME49_240220 | c.-393C>T    | 5_prime_UTR_premature_start_codon_gain_variant | hypothetical protein |
| TGME49_240220 | c.-294A>C    | 5_prime_UTR_premature_start_codon_gain_variant | hypothetical protein |
| TGME49_240220 | p.Asn960Ser  | missense_variant                               | hypothetical protein |
| TGME49_240220 | p.Asp1124Gly | missense_variant                               | hypothetical protein |
| TGME49_240220 | p.Ala1169Gly | missense_variant                               | hypothetical protein |
| TGME49_240220 | p.Asn1205Ser | missense_variant                               | hypothetical protein |
| TGME49_240220 | p.Ala1229Gly | missense_variant                               | hypothetical protein |
| TGME49_240220 | p.Arg1272Leu | missense_variant                               | hypothetical protein |
| TGME49_240220 | p.Thr1404Ala | missense_variant                               | hypothetical protein |
| TGME49_240230 | c.607-6T>C   | splice_region_variant                          | hypothetical protein |
| TGME49_240230 | c.664-6A>C   | splice_region_variant                          | hypothetical protein |
| TGME49_240230 | p.Gln237His  | missense_variant                               | hypothetical protein |
| TGME49_240243 | c.-149C>G    | 5_prime_UTR_premature_start_codon_gain_variant | hypothetical protein |
| TGME49_240255 | p.Gly100Ala  | missense_variant                               | hypothetical protein |
| TGME49_240260 | p.Arg109Pro  | missense_variant                               | hypothetical protein |
| TGME49_279550 | p.Ala54Ser   | missense_variant                               | hypothetical protein |
| TGME49_280725 | p.Lys183Asn  | missense_variant                               | hypothetical protein |
| TGME49_280725 | p.Gly436Ser  | missense_variant                               | hypothetical protein |
| TGME49_280720 | p.Thr27Ser   | missense_variant                               | hypothetical protein |
| TGME49_280720 | p.Asp207Gly  | missense_variant                               | hypothetical protein |
| TGME49_280720 | p.Ala446Thr  | missense_variant                               | hypothetical protein |
| TGME49_280680 | c.-382A>G    | 5_prime_UTR_premature_start_codon_gain_variant | hypothetical protein |
| TGME49_280680 | c.-118C>G    | 5_prime_UTR_premature_start_codon_gain_variant | hypothetical protein |
| TGME49_280680 | p.Glu200Asp  | missense_variant                               | hypothetical protein |
| TGME49_280605 | p.Asn3Ile    | missense_variant                               | hypothetical protein |
| TGME49_280605 | p.Arg475Trp  | missense_variant                               | hypothetical protein |
| TGME49_280605 | p.Lys525Glu  | missense_variant                               | hypothetical protein |
| TGME49_280605 | p.Leu1023Phe | missense_variant                               | hypothetical protein |
| TGME49_280590 | p.Arg107Ile  | missense_variant                               | hypothetical protein |
| TGME49_280590 | p.Asn396His  | missense_variant                               | hypothetical protein |
| TGME49_280590 | p.Leu468Val  | missense_variant                               | hypothetical protein |
| TGME49_280590 | p.Pro990His  | missense_variant                               | hypothetical protein |
| TGME49_280590 | p.Ala1059Ser | missense_variant                               | hypothetical protein |
| TGME49_280590 | p.Asp1393Asn | missense_variant                               | hypothetical protein |
| TGME49_280590 | p.Pro1439Ser | missense_variant                               | hypothetical protein |
| TGME49_280590 | p.Gly1665Asp | missense_variant                               | hypothetical protein |
| TGME49_263990 | c.-366T>C    | 5_prime_UTR_premature_start_codon_gain_variant | hypothetical protein |
| TGME49_257360 | p.Val771Ile  | missense_variant                               | hypothetical protein |
| TGME49_255930 | p.Ala130Glu  | missense_variant                               | hypothetical protein |
| TGME49_266980 | p.Ser183Arg  | missense_variant                               | hypothetical protein |
| TGME49_288940 | p.Ser410Pro  | missense_variant                               | hypothetical protein |
| TGME49_210210 | p.Leu319Ile  | missense_variant                               | hypothetical protein |
| TGME49_306230 | p.Ala364Thr  | missense_variant                               | hypothetical protein |
| TGME49_228670 | p.Thr1314Ala | missense_variant                               | hypothetical protein |
| TGME49_224920 | p.Thr1635Ala | missense_variant                               | hypothetical protein |
| TGME49_224920 | p.Glu1303Asp | missense_variant                               | hypothetical protein |
| TGME49_224920 | p.Ile831Leu  | missense_variant                               | hypothetical protein |
| TGME49_224920 | p.Leu225Val  | missense_variant                               | hypothetical protein |
| TGME49_224920 | p.Asn120Thr  | missense_variant                               | hypothetical protein |
| TGME49_224920 | p.Asn120Asp  | missense_variant                               | hypothetical protein |
| TGME49_224920 | p.Gln95Glu   | missense_variant                               | hypothetical protein |
| TGME49_224920 | c.-278A>G    | 5_prime_UTR_premature_start_codon_gain_variant | hypothetical protein |
| TGME49_224890 | p.Val704Ile  | missense_variant                               | hypothetical protein |
| TGME49_224890 | p.Ile139Thr  | missense_variant                               | hypothetical protein |
| TGME49_224890 | c.-17C>T     | 5_prime_UTR_premature_start_codon_gain_variant | hypothetical protein |
| TGME49_224870 | p.Glu442Gln  | missense_variant                               | hypothetical protein |
| TGME49_224870 | p.Pro657Arg  | missense_variant                               | hypothetical protein |
| TGME49_224870 | p.Gly1331Arg | missense_variant                               | hypothetical protein |
| TGME49_224870 | p.Ala1416Glu | missense_variant                               | hypothetical protein |
| TGME49_224870 | p.Arg1426Trp | missense_variant                               | hypothetical protein |
| TGME49_224870 | p.Gly1776Ser | missense_variant                               | hypothetical protein |
| TGME49_224870 | p.Gly1785Arg | missense_variant                               | hypothetical protein |
| TGME49_224870 | p.Gly1929Asp | missense_variant                               | hypothetical protein |
| TGME49_224870 | p.Asp2058Gly | missense_variant                               | hypothetical protein |
| TGME49_224870 | p.Ile2230Val | missense_variant                               | hypothetical protein |
| TGME49_224870 | p.Val2285Leu | missense_variant                               | hypothetical protein |
| TGME49_224870 | p.Glu2359Asp | missense_variant                               | hypothetical protein |



|               |              |                                                |                      |
|---------------|--------------|------------------------------------------------|----------------------|
| TGME49_224870 | p.Ser2401Thr | missense_variant                               | hypothetical protein |
| TGME49_224870 | p.Met2407Ile | missense_variant                               | hypothetical protein |
| TGME49_224870 | p.Ser3037Ala | missense_variant                               | hypothetical protein |
| TGME49_224870 | p.Glu3260Gln | missense_variant                               | hypothetical protein |
| TGME49_224870 | p.Arg3263Lys | missense_variant                               | hypothetical protein |
| TGME49_224870 | p.Glu3369Gly | missense_variant                               | hypothetical protein |
| TGME49_224870 | p.Arg3385Gln | missense_variant                               | hypothetical protein |
| TGME49_224870 | p.Asp3410Glu | missense_variant                               | hypothetical protein |
| TGME49_224870 | c.10737+3A>G | splice_region_variant                          | hypothetical protein |
| TGME49_224870 | p.Pro4622Leu | missense_variant                               | hypothetical protein |
| TGME49_224870 | p.Ser4879Cys | missense_variant                               | hypothetical protein |
| TGME49_224870 | p.Ala4965Val | missense_variant                               | hypothetical protein |
| TGME49_224870 | c.16707-5T>C | splice_region_variant                          | hypothetical protein |
| TGME49_224870 | p.Ala5809Val | missense_variant                               | hypothetical protein |
| TGME49_224870 | c.18213-5T>C | splice_region_variant                          | hypothetical protein |
| TGME49_224870 | p.Pro6769Leu | missense_variant                               | hypothetical protein |
| TGME49_224870 | p.Ala6945Thr | missense_variant                               | hypothetical protein |
| TGME49_224870 | p.Glu7348Asp | missense_variant                               | hypothetical protein |
| TGME49_224870 | p.Gly7409Asp | missense_variant                               | hypothetical protein |
| TGME49_224870 | p.Ala7516Val | missense_variant                               | hypothetical protein |
| TGME49_224870 | p.Ala7519Thr | missense_variant                               | hypothetical protein |
| TGME49_224870 | p.Glu7703Ala | missense_variant                               | hypothetical protein |
| TGME49_224870 | p.Lys8129Asn | missense_variant                               | hypothetical protein |
| TGME49_224870 | p.Val8174Phe | missense_variant                               | hypothetical protein |
| TGME49_224870 | p.Pro8261Leu | missense_variant                               | hypothetical protein |
| TGME49_224870 | p.Val8566Leu | missense_variant                               | hypothetical protein |
| TGME49_224845 | c.-976A>C    | 5_prime_UTR_premature_start_codon_gain_variant | hypothetical protein |
| TGME49_224845 | c.-982G>A    | 5_prime_UTR_premature_start_codon_gain_variant | hypothetical protein |
| TGME49_224845 | c.-1255T>C   | 5_prime_UTR_premature_start_codon_gain_variant | hypothetical protein |
| TGME49_224830 | p.Gly453Ala  | missense_variant                               | hypothetical protein |
| TGME49_224830 | p.Tyr122Phe  | missense_variant                               | hypothetical protein |
| TGME49_224820 | p.Ile31Val   | missense_variant                               | hypothetical protein |
| TGME49_224820 | p.Arg337His  | missense_variant                               | hypothetical protein |
| TGME49_224810 | p.Ala1649Thr | missense_variant                               | hypothetical protein |
| TGME49_224810 | p.Asn1528Thr | missense_variant                               | hypothetical protein |
| TGME49_224810 | p.Ser1462Gly | missense_variant                               | hypothetical protein |
| TGME49_224810 | p.Arg1363Cys | missense_variant                               | hypothetical protein |
| TGME49_224810 | p.Glu894Ala  | missense_variant                               | hypothetical protein |
| TGME49_224740 | c.-529A>T    | 5_prime_UTR_premature_start_codon_gain_variant | hypothetical protein |
| TGME49_224730 | c.-586C>T    | 5_prime_UTR_premature_start_codon_gain_variant | hypothetical protein |
| TGME49_224730 | p.Gly247Arg  | missense_variant                               | hypothetical protein |
| TGME49_224700 | p.Pro1165Leu | missense_variant                               | hypothetical protein |
| TGME49_224700 | p.Pro749Leu  | missense_variant                               | hypothetical protein |
| TGME49_224700 | p.Gly501Ser  | missense_variant                               | hypothetical protein |
| TGME49_224700 | p.Val435Ala  | missense_variant                               | hypothetical protein |
| TGME49_224700 | c.-129C>T    | 5_prime_UTR_premature_start_codon_gain_variant | hypothetical protein |
| TGME49_224700 | c.-186G>A    | 5_prime_UTR_premature_start_codon_gain_variant | hypothetical protein |
| TGME49_224680 | p.Ser74Pro   | missense_variant                               | hypothetical protein |
| TGME49_224680 | p.Gly70Ala   | missense_variant                               | hypothetical protein |
| TGME49_224675 | p.Arg105Gly  | missense_variant                               | hypothetical protein |
| TGME49_224620 | c.805+7G>C   | splice_region_variant                          | hypothetical protein |
| TGME49_224620 | c.-857G>T    | 5_prime_UTR_premature_start_codon_gain_variant | hypothetical protein |
| TGME49_224575 | p.Ile48Phe   | missense_variant                               | hypothetical protein |
| TGME49_224575 | c.-77C>T     | 5_prime_UTR_premature_start_codon_gain_variant | hypothetical protein |
| TGME49_224560 | p.Lys104Thr  | missense_variant                               | hypothetical protein |
| TGME49_224560 | p.Cys98Gly   | missense_variant                               | hypothetical protein |
| TGME49_224540 | p.Asp4554Asn | missense_variant                               | hypothetical protein |
| TGME49_224540 | p.Ala2117Val | missense_variant                               | hypothetical protein |
| TGME49_224540 | p.Gly1578Glu | missense_variant                               | hypothetical protein |
| TGME49_224540 | p.Glu1577Ala | missense_variant                               | hypothetical protein |
| TGME49_224540 | p.Glu668Gln  | missense_variant                               | hypothetical protein |
| TGME49_224540 | p.Lys658Thr  | missense_variant                               | hypothetical protein |
| TGME49_224540 | p.Asp294Tyr  | missense_variant                               | hypothetical protein |
| TGME49_224510 | p.Ser1134Leu | missense_variant                               | hypothetical protein |
| TGME49_224510 | p.Ala464Val  | missense_variant                               | hypothetical protein |
| TGME49_224510 | p.Val397Met  | missense_variant                               | hypothetical protein |
| TGME49_224510 | p.Ser302Leu  | missense_variant                               | hypothetical protein |
| TGME49_224510 | p.Arg140Ser  | missense_variant                               | hypothetical protein |
| TGME49_224470 | p.Arg17Gln   | missense_variant                               | hypothetical protein |
| TGME49_224340 | p.Phe130Leu  | missense_variant                               | hypothetical protein |
| TGME49_224320 | p.Ala516Val  | missense_variant                               | hypothetical protein |
| TGME49_224320 | p.Pro601Ser  | missense_variant                               | hypothetical protein |
| TGME49_224320 | p.Arg703Ser  | missense_variant                               | hypothetical protein |
| TGME49_224320 | p.Gly750Ser  | missense_variant                               | hypothetical protein |
| TGME49_224320 | p.Pro782Leu  | missense_variant                               | hypothetical protein |
| TGME49_224320 | p.Arg1096His | missense_variant                               | hypothetical protein |
| TGME49_224320 | p.Ser1135Leu | missense_variant                               | hypothetical protein |
| TGME49_224320 | p.Pro1180Leu | missense_variant                               | hypothetical protein |
| TGME49_224320 | p.Pro1183Leu | missense_variant                               | hypothetical protein |
| TGME49_224320 | p.Arg1572Ser | missense_variant                               | hypothetical protein |
| TGME49_224320 | p.Glu1573Gly | missense_variant                               | hypothetical protein |
| TGME49_224320 | p.Thr1640Ala | missense_variant                               | hypothetical protein |
| TGME49_224320 | p.Ser1916Leu | missense_variant                               | hypothetical protein |
| TGME49_224320 | p.Phe2097Leu | missense_variant                               | hypothetical protein |
| TGME49_224320 | p.Leu2160Arg | missense_variant                               | hypothetical protein |

|               |              |                                                |                      |
|---------------|--------------|------------------------------------------------|----------------------|
| TGME49_224320 | p.Ser2292Thr | missense_variant                               | hypothetical protein |
| TGME49_224275 | c.168-4T>G   | splice_region_variant                          | hypothetical protein |
| TGME49_224270 | p.Arg3326His | missense_variant                               | hypothetical protein |
| TGME49_224270 | p.Leu3214Val | missense_variant                               | hypothetical protein |
| TGME49_224270 | p.His2895Asn | missense_variant                               | hypothetical protein |
| TGME49_224270 | p.Val2267Asp | missense_variant                               | hypothetical protein |
| TGME49_224270 | p.Val2267Ile | missense_variant                               | hypothetical protein |
| TGME49_224270 | p.Cys1978Tyr | missense_variant                               | hypothetical protein |
| TGME49_224270 | p.Arg1936Leu | missense_variant                               | hypothetical protein |
| TGME49_224270 | p.Gln1732Glu | missense_variant                               | hypothetical protein |
| TGME49_224270 | p.Gly1482Arg | missense_variant                               | hypothetical protein |
| TGME49_224270 | p.Thr1397Ala | missense_variant                               | hypothetical protein |
| TGME49_224270 | p.Thr1284Ser | missense_variant                               | hypothetical protein |
| TGME49_224270 | p.Pro1173Ala | missense_variant                               | hypothetical protein |
| TGME49_224270 | p.Leu984Pro  | missense_variant                               | hypothetical protein |
| TGME49_224270 | p.Ala876Val  | missense_variant                               | hypothetical protein |
| TGME49_224270 | p.Ala666Thr  | missense_variant                               | hypothetical protein |
| TGME49_224270 | p.Ala571Val  | missense_variant                               | hypothetical protein |
| TGME49_224270 | p.Asp459Asn  | missense_variant                               | hypothetical protein |
| TGME49_224270 | p.Lys234Glu  | missense_variant                               | hypothetical protein |
| TGME49_224270 | p.Glu8Lys    | missense_variant                               | hypothetical protein |
| TGME49_224210 | p.Glu573Asp  | missense_variant                               | hypothetical protein |
| TGME49_224210 | p.Gln346His  | missense_variant                               | hypothetical protein |
| TGME49_224210 | p.Gly269Ala  | missense_variant                               | hypothetical protein |
| TGME49_224210 | p.Asn99Ile   | missense_variant                               | hypothetical protein |
| TGME49_224180 | p.Gln1037His | missense_variant                               | hypothetical protein |
| TGME49_224180 | p.Glu796Asp  | missense_variant                               | hypothetical protein |
| TGME49_224180 | p.Glu787Lys  | missense_variant                               | hypothetical protein |
| TGME49_224160 | p.Leu254Val  | missense_variant                               | hypothetical protein |
| TGME49_224160 | p.Ser586Leu  | missense_variant                               | hypothetical protein |
| TGME49_224160 | p.Pro1747Ser | missense_variant                               | hypothetical protein |
| TGME49_224150 | c.-35C>T     | 5_prime_UTR_premature_start_codon_gain_variant | hypothetical protein |
| TGME49_224150 | p.Thr603Ser  | missense_variant                               | hypothetical protein |
| TGME49_224150 | p.Thr673Ile  | missense_variant                               | hypothetical protein |
| TGME49_224150 | p.Met834Val  | missense_variant                               | hypothetical protein |
| TGME49_224150 | p.Lys1261Arg | missense_variant                               | hypothetical protein |
| TGME49_224140 | p.Phe1042Leu | missense_variant                               | hypothetical protein |
| TGME49_224140 | p.Phe799Ile  | missense_variant                               | hypothetical protein |
| TGME49_224140 | p.Ala658Glu  | missense_variant                               | hypothetical protein |
| TGME49_224140 | p.Met582Lys  | missense_variant                               | hypothetical protein |
| TGME49_224140 | p.Arg552Gln  | missense_variant                               | hypothetical protein |
| TGME49_224140 | p.Ala455Gly  | missense_variant                               | hypothetical protein |
| TGME49_224130 | c.-161C>T    | 5_prime_UTR_premature_start_codon_gain_variant | hypothetical protein |
| TGME49_224100 | p.Ile176Thr  | missense_variant                               | hypothetical protein |
| TGME49_224070 | p.Pro487Gln  | missense_variant                               | hypothetical protein |
| TGME49_224070 | p.Ala576Val  | missense_variant                               | hypothetical protein |
| TGME49_224070 | p.Phe853Leu  | missense_variant                               | hypothetical protein |
| TGME49_224070 | p.Ala939Thr  | missense_variant                               | hypothetical protein |
| TGME49_224070 | p.Ala987Asp  | missense_variant                               | hypothetical protein |
| TGME49_224030 | p.Leu1040Phe | missense_variant                               | hypothetical protein |
| TGME49_224030 | p.Gly570Arg  | missense_variant                               | hypothetical protein |
| TGME49_224030 | p.Asp462Asn  | missense_variant                               | hypothetical protein |
| TGME49_224030 | p.Lys408Arg  | missense_variant                               | hypothetical protein |
| TGME49_224030 | p.Phe89Ile   | missense_variant                               | hypothetical protein |
| TGME49_224010 | p.Asp302Glu  | missense_variant                               | hypothetical protein |
| TGME49_224010 | p.Asn515Lys  | missense_variant                               | hypothetical protein |
| TGME49_224000 | p.Arg184Gln  | missense_variant                               | hypothetical protein |
| TGME49_223915 | p.Glu85Gln   | missense_variant                               | hypothetical protein |
| TGME49_223900 | p.Gln961Lys  | missense_variant                               | hypothetical protein |
| TGME49_223900 | p.Ala989Thr  | missense_variant                               | hypothetical protein |
| TGME49_223870 | p.Ala28Val   | missense_variant                               | hypothetical protein |
| TGME49_223870 | p.Val259Ala  | missense_variant                               | hypothetical protein |
| TGME49_223870 | p.Gln385Lys  | missense_variant                               | hypothetical protein |
| TGME49_223870 | p.Asp509Gly  | missense_variant                               | hypothetical protein |
| TGME49_223810 | p.Phe601Cys  | missense_variant                               | hypothetical protein |
| TGME49_223810 | p.Arg383Met  | missense_variant                               | hypothetical protein |
| TGME49_223810 | p.Glu261Gln  | missense_variant                               | hypothetical protein |
| TGME49_223810 | p.Arg254Gly  | missense_variant                               | hypothetical protein |
| TGME49_223810 | p.Ser234Tyr  | missense_variant                               | hypothetical protein |
| TGME49_223810 | p.Leu233Trp  | missense_variant                               | hypothetical protein |
| TGME49_223810 | p.Glu224Lys  | missense_variant                               | hypothetical protein |
| TGME49_223810 | c.-792C>T    | 5_prime_UTR_premature_start_codon_gain_variant | hypothetical protein |
| TGME49_223800 | p.Arg124Thr  | missense_variant                               | hypothetical protein |
| TGME49_223790 | p.Gly842Asp  | missense_variant                               | hypothetical protein |
| TGME49_223780 | c.4146-4C>T  | splice_region_variant                          | hypothetical protein |
| TGME49_223780 | p.Pro525Leu  | missense_variant                               | hypothetical protein |
| TGME49_223780 | p.Pro525Ser  | missense_variant                               | hypothetical protein |
| TGME49_223780 | p.Thr450Ala  | missense_variant                               | hypothetical protein |
| TGME49_223780 | c.-177C>T    | 5_prime_UTR_premature_start_codon_gain_variant | hypothetical protein |
| TGME49_223780 | c.-252G>A    | 5_prime_UTR_premature_start_codon_gain_variant | hypothetical protein |
| TGME49_223780 | c.-768A>T    | 5_prime_UTR_premature_start_codon_gain_variant | hypothetical protein |
| TGME49_223760 | c.4281+6T>C  | splice_region_variant                          | hypothetical protein |
| TGME49_223760 | p.Gly1142Ser | missense_variant                               | hypothetical protein |
| TGME49_223760 | p.Leu1138Phe | missense_variant                               | hypothetical protein |
| TGME49_223760 | p.Ala1113Pro | missense_variant                               | hypothetical protein |

|               |              |                                                |                      |
|---------------|--------------|------------------------------------------------|----------------------|
| TGME49_223760 | p.Arg946Pro  | missense_variant                               | hypothetical protein |
| TGME49_223760 | p.Ala774Thr  | missense_variant                               | hypothetical protein |
| TGME49_223760 | p.Asn766Ser  | missense_variant                               | hypothetical protein |
| TGME49_223760 | p.Leu525Pro  | missense_variant                               | hypothetical protein |
| TGME49_223760 | c.-723T>G    | 5_prime_UTR_premature_start_codon_gain_variant | hypothetical protein |
| TGME49_223725 | p.Arg4186His | missense_variant                               | hypothetical protein |
| TGME49_223725 | p.Val4067Ala | missense_variant                               | hypothetical protein |
| TGME49_223725 | p.Phe3233Cys | missense_variant                               | hypothetical protein |
| TGME49_223725 | p.Lys3083Asn | missense_variant                               | hypothetical protein |
| TGME49_223725 | p.Ser2992Arg | missense_variant                               | hypothetical protein |
| TGME49_223725 | p.Glu2979Asp | missense_variant                               | hypothetical protein |
| TGME49_223725 | p.Val2940Met | missense_variant                               | hypothetical protein |
| TGME49_223725 | p.Glu2896Ala | missense_variant                               | hypothetical protein |
| TGME49_223725 | p.Gly2877Asp | missense_variant                               | hypothetical protein |
| TGME49_223725 | p.Asp2636Asn | missense_variant                               | hypothetical protein |
| TGME49_223725 | p.Ala2634Thr | missense_variant                               | hypothetical protein |
| TGME49_223725 | p.Ser2580Phe | missense_variant                               | hypothetical protein |
| TGME49_223725 | p.Thr2217Ala | missense_variant                               | hypothetical protein |
| TGME49_223725 | p.His1935Gln | missense_variant                               | hypothetical protein |
| TGME49_223725 | p.His1888Arg | missense_variant                               | hypothetical protein |
| TGME49_223725 | p.Leu1707Pro | missense_variant                               | hypothetical protein |
| TGME49_223725 | p.Glu1294Asp | missense_variant                               | hypothetical protein |
| TGME49_223725 | p.Ser838Pro  | missense_variant                               | hypothetical protein |
| TGME49_223725 | p.Cys185Tyr  | missense_variant                               | hypothetical protein |
| TGME49_223690 | c.-228G>T    | 5_prime_UTR_premature_start_codon_gain_variant | hypothetical protein |
| TGME49_223685 | c.-43C>G     | 5_prime_UTR_premature_start_codon_gain_variant | hypothetical protein |
| TGME49_223650 | p.Ser52Cys   | missense_variant                               | hypothetical protein |
| TGME49_223640 | p.Lys197Gln  | missense_variant                               | hypothetical protein |
| TGME49_223640 | p.Arg244Lys  | missense_variant                               | hypothetical protein |
| TGME49_223640 | p.Arg494Gly  | missense_variant                               | hypothetical protein |
| TGME49_223640 | p.Ser748Asn  | missense_variant                               | hypothetical protein |
| TGME49_223640 | p.Lys793Gln  | missense_variant                               | hypothetical protein |
| TGME49_223640 | p.Glu1021Asp | missense_variant                               | hypothetical protein |
| TGME49_223640 | p.Leu1071Val | missense_variant                               | hypothetical protein |
| TGME49_223640 | p.Leu1108Gln | missense_variant                               | hypothetical protein |
| TGME49_223640 | p.Leu1118Pro | missense_variant                               | hypothetical protein |
| TGME49_223640 | p.Gln1288His | missense_variant                               | hypothetical protein |
| TGME49_223640 | p.Ser1429Ala | missense_variant                               | hypothetical protein |
| TGME49_223640 | p.Ala1579Gly | missense_variant                               | hypothetical protein |
| TGME49_223630 | p.Asp424Gly  | missense_variant                               | hypothetical protein |
| TGME49_223610 | p.Glu1198Asp | missense_variant                               | hypothetical protein |
| TGME49_223610 | p.Ala187Pro  | missense_variant                               | hypothetical protein |
| TGME49_223600 | p.Ile586Val  | missense_variant                               | hypothetical protein |
| TGME49_223600 | p.Arg253Gln  | missense_variant                               | hypothetical protein |
| TGME49_223600 | p.Gln236His  | missense_variant                               | hypothetical protein |
| TGME49_223600 | p.Pro86Ser   | missense_variant                               | hypothetical protein |
| TGME49_223600 | p.Val67Ala   | missense_variant                               | hypothetical protein |
| TGME49_223600 | p.Ser37Leu   | missense_variant                               | hypothetical protein |
| TGME49_223600 | c.-721G>A    | 5_prime_UTR_premature_start_codon_gain_variant | hypothetical protein |
| TGME49_223600 | c.-925C>T    | 5_prime_UTR_premature_start_codon_gain_variant | hypothetical protein |
| TGME49_223570 | p.Ala633Thr  | missense_variant                               | hypothetical protein |
| TGME49_223570 | p.Val130Leu  | missense_variant                               | hypothetical protein |
| TGME49_223570 | p.Arg21His   | missense_variant                               | hypothetical protein |
| TGME49_223560 | c.-1263C>T   | 5_prime_UTR_premature_start_codon_gain_variant | hypothetical protein |
| TGME49_223560 | p.Ile254Met  | missense_variant                               | hypothetical protein |
| TGME49_223550 | p.Val107Leu  | missense_variant                               | hypothetical protein |
| TGME49_223530 | p.Asn88Ser   | missense_variant                               | hypothetical protein |
| TGME49_223510 | p.Ala180Val  | missense_variant                               | hypothetical protein |
| TGME49_223510 | c.-231T>C    | 5_prime_UTR_premature_start_codon_gain_variant | hypothetical protein |
| TGME49_223510 | c.-298G>C    | 5_prime_UTR_premature_start_codon_gain_variant | hypothetical protein |
| TGME49_223500 | p.Ile169Met  | missense_variant                               | hypothetical protein |
| TGME49_223500 | p.Gly768Ala  | missense_variant                               | hypothetical protein |
| TGME49_223500 | p.Met1011Val | missense_variant                               | hypothetical protein |
| TGME49_223490 | p.Asp150Gly  | missense_variant                               | hypothetical protein |
| TGME49_223485 | p.Leu15Met   | missense_variant                               | hypothetical protein |
| TGME49_223485 | p.Arg33Leu   | missense_variant                               | hypothetical protein |
| TGME49_223485 | p.Leu114Arg  | missense_variant                               | hypothetical protein |
| TGME49_223270 | p.Arg1309Ser | missense_variant                               | hypothetical protein |
| TGME49_223270 | c.2888-8C>A  | splice_region_variant                          | hypothetical protein |
| TGME49_223270 | p.Val234Leu  | missense_variant                               | hypothetical protein |
| TGME49_223270 | p.Val91Ala   | missense_variant                               | hypothetical protein |
| TGME49_223270 | p.Ala44Thr   | missense_variant                               | hypothetical protein |
| TGME49_223258 | p.Thr298Ala  | missense_variant                               | hypothetical protein |
| TGME49_212300 | p.Val73Leu   | missense_variant                               | hypothetical protein |
| TGME49_212300 | p.Ile641Val  | missense_variant                               | hypothetical protein |
| TGME49_212270 | p.Ala136Thr  | missense_variant                               | hypothetical protein |
| TGME49_212220 | c.-563C>T    | 5_prime_UTR_premature_start_codon_gain_variant | hypothetical protein |
| TGME49_212220 | p.Gly15Asp   | missense_variant                               | hypothetical protein |
| TGME49_212200 | p.Gly223Trp  | missense_variant                               | hypothetical protein |
| TGME49_212150 | p.Ile488Leu  | missense_variant                               | hypothetical protein |
| TGME49_212150 | c.1025+6G>C  | splice_region_variant                          | hypothetical protein |
| TGME49_212140 | p.Ala115Gly  | missense_variant                               | hypothetical protein |
| TGME49_212140 | p.Gly793Glu  | missense_variant                               | hypothetical protein |
| TGME49_212140 | p.Lys833Gln  | missense_variant                               | hypothetical protein |
| TGME49_212140 | p.Ser1409Ala | missense_variant                               | hypothetical protein |

|               |              |                                                |                      |
|---------------|--------------|------------------------------------------------|----------------------|
| TGME49_212140 | p.Ala1497Gly | missense_variant                               | hypothetical protein |
| TGME49_212140 | p.Glu1646Asp | missense_variant                               | hypothetical protein |
| TGME49_212140 | c.5268+7T>C  | splice_region_variant                          | hypothetical protein |
| TGME49_212090 | p.Val122Ala  | missense_variant                               | hypothetical protein |
| TGME49_212090 | c.-1255C>T   | 5_prime_UTR_premature_start_codon_gain_variant | hypothetical protein |
| TGME49_212075 | p.Gln238Arg  | missense_variant                               | hypothetical protein |
| TGME49_212030 | p.Phe435Leu  | missense_variant                               | hypothetical protein |
| TGME49_212030 | p.Lys320Arg  | missense_variant                               | hypothetical protein |
| TGME49_211880 | p.His72Pro   | missense_variant                               | hypothetical protein |
| TGME49_211860 | p.Asp262Gly  | missense_variant                               | hypothetical protein |
| TGME49_234180 | c.-489T>G    | 5_prime_UTR_premature_start_codon_gain_variant | hypothetical protein |
| TGME49_234180 | p.Arg148Gly  | missense_variant                               | hypothetical protein |
| TGME49_234200 | p.His728Asp  | missense_variant                               | hypothetical protein |
| TGME49_234200 | p.Ser706Cys  | missense_variant                               | hypothetical protein |
| TGME49_234200 | p.Lys657Asn  | missense_variant                               | hypothetical protein |
| TGME49_234200 | p.Gln127His  | missense_variant                               | hypothetical protein |
| TGME49_234200 | p.Thr47Met   | missense_variant                               | hypothetical protein |
| TGME49_234200 | c.-827C>G    | 5_prime_UTR_premature_start_codon_gain_variant | hypothetical protein |
| TGME49_234220 | c.-552C>G    | 5_prime_UTR_premature_start_codon_gain_variant | hypothetical protein |
| TGME49_234220 | c.-500C>A    | 5_prime_UTR_premature_start_codon_gain_variant | hypothetical protein |
| TGME49_234220 | p.Asn72Asp   | missense_variant                               | hypothetical protein |
| TGME49_234220 | p.Pro219Ser  | missense_variant                               | hypothetical protein |
| TGME49_234220 | p.Asp604Asn  | missense_variant                               | hypothetical protein |
| TGME49_234220 | p.Leu746Phe  | missense_variant                               | hypothetical protein |
| TGME49_234220 | p.Ser837Thr  | missense_variant                               | hypothetical protein |
| TGME49_234230 | p.Asp3952Glu | missense_variant                               | hypothetical protein |
| TGME49_234230 | p.Ala3901Thr | missense_variant                               | hypothetical protein |
| TGME49_234230 | p.Glu3857Asp | missense_variant                               | hypothetical protein |
| TGME49_234230 | p.Glu3573Asp | missense_variant                               | hypothetical protein |
| TGME49_234230 | p.Pro3357Arg | missense_variant                               | hypothetical protein |
| TGME49_234230 | p.Ser3267Asn | missense_variant                               | hypothetical protein |
| TGME49_234230 | c.8974-7C>T  | splice_region_variant                          | hypothetical protein |
| TGME49_234230 | p.Gly2189Ser | missense_variant                               | hypothetical protein |
| TGME49_234230 | p.Arg203Gly  | missense_variant                               | hypothetical protein |
| TGME49_234250 | p.Gln2051Lys | missense_variant&splice_region_variant         | hypothetical protein |
| TGME49_234250 | c.5927-4C>G  | splice_region_variant                          | hypothetical protein |
| TGME49_234250 | p.Ala1479Thr | missense_variant                               | hypothetical protein |
| TGME49_234250 | p.Ile969Thr  | missense_variant                               | hypothetical protein |
| TGME49_234250 | p.Pro869Ser  | missense_variant                               | hypothetical protein |
| TGME49_234250 | p.Trp614Leu  | missense_variant                               | hypothetical protein |
| TGME49_234250 | p.Ala357Val  | missense_variant                               | hypothetical protein |
| TGME49_234250 | p.Pro224Leu  | missense_variant                               | hypothetical protein |
| TGME49_234260 | p.Asp105His  | missense_variant                               | hypothetical protein |
| TGME49_234270 | p.Lys134Asn  | missense_variant                               | hypothetical protein |
| TGME49_234270 | p.Thr881Lys  | missense_variant                               | hypothetical protein |
| TGME49_234270 | p.Glu891Asp  | missense_variant                               | hypothetical protein |
| TGME49_234270 | p.Ser902Leu  | missense_variant                               | hypothetical protein |
| TGME49_234270 | p.Arg1575Pro | missense_variant                               | hypothetical protein |
| TGME49_234270 | p.Gly1769Ser | missense_variant                               | hypothetical protein |
| TGME49_234270 | p.Thr2209Ser | missense_variant                               | hypothetical protein |
| TGME49_234300 | p.Arg2561Cys | missense_variant                               | hypothetical protein |
| TGME49_234300 | p.Ala2286Val | missense_variant                               | hypothetical protein |
| TGME49_234300 | p.Phe2124Val | missense_variant                               | hypothetical protein |
| TGME49_234300 | p.Ser1957Thr | missense_variant                               | hypothetical protein |
| TGME49_234300 | p.Val1952Ile | missense_variant                               | hypothetical protein |
| TGME49_234300 | p.Ala1568Thr | missense_variant                               | hypothetical protein |
| TGME49_234300 | p.Val1238Phe | missense_variant                               | hypothetical protein |
| TGME49_234300 | p.Phe552Leu  | missense_variant                               | hypothetical protein |
| TGME49_234300 | p.Ala422Pro  | missense_variant                               | hypothetical protein |
| TGME49_234300 | p.Ser317Cys  | missense_variant                               | hypothetical protein |
| TGME49_234300 | p.Pro218Ser  | missense_variant                               | hypothetical protein |
| TGME49_234300 | p.Asp211Val  | missense_variant                               | hypothetical protein |
| TGME49_234300 | p.Leu96Phe   | missense_variant                               | hypothetical protein |
| TGME49_234300 | p.Arg66Ser   | missense_variant                               | hypothetical protein |
| TGME49_234300 | c.-1815A>G   | 5_prime_UTR_premature_start_codon_gain_variant | hypothetical protein |
| TGME49_234310 | c.-874T>G    | 5_prime_UTR_premature_start_codon_gain_variant | hypothetical protein |
| TGME49_234340 | p.Phe58Cys   | missense_variant                               | hypothetical protein |
| TGME49_234350 | p.Thr693Asn  | missense_variant                               | hypothetical protein |
| TGME49_234350 | p.Gln360His  | missense_variant                               | hypothetical protein |
| TGME49_234375 | c.-416T>C    | 5_prime_UTR_premature_start_codon_gain_variant | hypothetical protein |
| TGME49_234430 | p.Ser2815Pro | missense_variant                               | hypothetical protein |
| TGME49_234430 | p.Ala2665Thr | missense_variant                               | hypothetical protein |
| TGME49_234430 | p.Ser2566Phe | missense_variant                               | hypothetical protein |
| TGME49_234430 | p.Gly2468Glu | missense_variant                               | hypothetical protein |
| TGME49_234430 | p.Gln2422Glu | missense_variant                               | hypothetical protein |
| TGME49_234430 | p.Glu2292Lys | missense_variant                               | hypothetical protein |
| TGME49_234430 | p.Ser2125Pro | missense_variant                               | hypothetical protein |
| TGME49_234430 | p.Leu2122Val | missense_variant                               | hypothetical protein |
| TGME49_234430 | p.Pro1947Leu | missense_variant                               | hypothetical protein |
| TGME49_234430 | p.Arg1819Cys | missense_variant                               | hypothetical protein |
| TGME49_234430 | p.Gly1672Arg | missense_variant                               | hypothetical protein |
| TGME49_234430 | p.Met1641Thr | missense_variant                               | hypothetical protein |
| TGME49_234430 | p.Leu1478His | missense_variant                               | hypothetical protein |
| TGME49_234430 | p.Gly1144Asp | missense_variant                               | hypothetical protein |
| TGME49_234430 | p.Arg1136Thr | missense_variant                               | hypothetical protein |

|               |              |                                                |                      |
|---------------|--------------|------------------------------------------------|----------------------|
| TGME49_234430 | p.Gly1062Val | missense_variant                               | hypothetical protein |
| TGME49_234430 | p.Ala920Ser  | missense_variant                               | hypothetical protein |
| TGME49_234430 | p.Trp872Gly  | missense_variant                               | hypothetical protein |
| TGME49_234430 | p.Gly869Glu  | missense_variant                               | hypothetical protein |
| TGME49_234430 | p.Ser655Pro  | missense_variant                               | hypothetical protein |
| TGME49_234430 | p.Arg410Gly  | missense_variant                               | hypothetical protein |
| TGME49_234430 | p.Asp172Asn  | missense_variant                               | hypothetical protein |
| TGME49_234430 | c.-171C>G    | 5_prime_UTR_premature_start_codon_gain_variant | hypothetical protein |
| TGME49_234430 | c.-653T>G    | 5_prime_UTR_premature_start_codon_gain_variant | hypothetical protein |
| TGME49_234470 | c.-2236G>T   | 5_prime_UTR_premature_start_codon_gain_variant | hypothetical protein |
| TGME49_234507 | p.Thr47Pro   | missense_variant                               | hypothetical protein |
| TGME49_234540 | p.Val449Phe  | missense_variant                               | hypothetical protein |
| TGME49_234540 | p.Ala216Ser  | missense_variant                               | hypothetical protein |
| TGME49_234560 | c.3511-4T>C  | splice_region_variant                          | hypothetical protein |
| TGME49_234560 | c.3510+7T>C  | splice_region_variant                          | hypothetical protein |
| TGME49_234560 | p.Glu1149Ala | missense_variant                               | hypothetical protein |
| TGME49_234560 | p.Gly763Glu  | missense_variant                               | hypothetical protein |
| TGME49_234590 | p.Arg231Ile  | missense_variant                               | hypothetical protein |
| TGME49_234590 | p.Glu153Gln  | missense_variant                               | hypothetical protein |
| TGME49_234590 | p.Asn137Asp  | missense_variant                               | hypothetical protein |
| TGME49_234590 | p.Ala93Thr   | missense_variant                               | hypothetical protein |
| TGME49_234590 | p.Lys88Arg   | missense_variant                               | hypothetical protein |
| TGME49_234590 | p.Ala53Val   | missense_variant                               | hypothetical protein |
| TGME49_234600 | p.Gln326Arg  | missense_variant                               | hypothetical protein |
| TGME49_234640 | p.Arg348Thr  | missense_variant                               | hypothetical protein |
| TGME49_234640 | p.Arg368Gln  | missense_variant                               | hypothetical protein |
| TGME49_234640 | p.Ser638Ala  | missense_variant                               | hypothetical protein |
| TGME49_234640 | p.Arg1289Ser | missense_variant                               | hypothetical protein |
| TGME49_234640 | p.Gly1472Ala | missense_variant                               | hypothetical protein |
| TGME49_234980 | p.Ser666Asn  | missense_variant                               | hypothetical protein |
| TGME49_234980 | p.Arg49Gly   | missense_variant                               | hypothetical protein |
| TGME49_234980 | c.-1155T>C   | 5_prime_UTR_premature_start_codon_gain_variant | hypothetical protein |
| TGME49_234980 | c.-2060G>T   | 5_prime_UTR_premature_start_codon_gain_variant | hypothetical protein |
| TGME49_234990 | p.Gly129Ala  | missense_variant                               | hypothetical protein |
| TGME49_234990 | p.Thr586Ala  | missense_variant                               | hypothetical protein |
| TGME49_234990 | p.Phe681Leu  | missense_variant                               | hypothetical protein |
| TGME49_234990 | p.Asp797Glu  | missense_variant                               | hypothetical protein |
| TGME49_234990 | p.Ala906Thr  | missense_variant                               | hypothetical protein |
| TGME49_234990 | p.Val922Ile  | missense_variant                               | hypothetical protein |
| TGME49_234990 | p.Glu1413*   | stop_gained                                    | hypothetical protein |
| TGME49_235010 | p.Gln14His   | missense_variant                               | hypothetical protein |
| TGME49_235140 | p.Ile267Met  | missense_variant                               | hypothetical protein |
| TGME49_235180 | p.Pro449Ala  | missense_variant                               | hypothetical protein |
| TGME49_235187 | p.His268Pro  | missense_variant                               | hypothetical protein |
| TGME49_235187 | c.2008-4C>G  | splice_region_variant                          | hypothetical protein |
| TGME49_235187 | p.Ile1096Met | missense_variant                               | hypothetical protein |
| TGME49_235190 | p.Thr308Ile  | missense_variant                               | hypothetical protein |
| TGME49_235340 | p.Ala153Thr  | missense_variant                               | hypothetical protein |
| TGME49_235370 | c.-597C>T    | 5_prime_UTR_premature_start_codon_gain_variant | hypothetical protein |
| TGME49_235380 | p.Pro132Leu  | missense_variant                               | hypothetical protein |
| TGME49_235420 | p.Pro3715Ser | missense_variant                               | hypothetical protein |
| TGME49_235420 | p.Asn3648Ser | missense_variant                               | hypothetical protein |
| TGME49_235420 | p.Ala3261Thr | missense_variant                               | hypothetical protein |
| TGME49_235420 | p.Ala3053Pro | missense_variant                               | hypothetical protein |
| TGME49_235420 | p.Ala2222Val | missense_variant                               | hypothetical protein |
| TGME49_235490 | c.1407+8A>G  | splice_region_variant                          | hypothetical protein |
| TGME49_235490 | c.1762+6C>T  | splice_region_variant                          | hypothetical protein |
| TGME49_235500 | p.Asp633Gly  | missense_variant                               | hypothetical protein |
| TGME49_235500 | p.Thr572Ala  | missense_variant                               | hypothetical protein |
| TGME49_235500 | p.Ser551Thr  | missense_variant                               | hypothetical protein |
| TGME49_235500 | p.Asp494Val  | missense_variant                               | hypothetical protein |
| TGME49_235500 | p.Ala190Pro  | missense_variant                               | hypothetical protein |
| TGME49_235500 | p.Phe25Ser   | missense_variant                               | hypothetical protein |
| TGME49_235500 | p.Phe20Leu   | missense_variant                               | hypothetical protein |
| TGME49_235560 | p.Arg494Lys  | missense_variant                               | hypothetical protein |
| TGME49_235560 | c.506+5G>A   | splice_region_variant                          | hypothetical protein |
| TGME49_235560 | p.Lys136Gln  | missense_variant                               | hypothetical protein |
| TGME49_235560 | p.Gln107Pro  | missense_variant                               | hypothetical protein |
| TGME49_235560 | c.-101A>G    | 5_prime_UTR_premature_start_codon_gain_variant | hypothetical protein |
| TGME49_235630 | p.Phe181Leu  | missense_variant                               | hypothetical protein |
| TGME49_235635 | p.Val75Ala   | missense_variant                               | hypothetical protein |
| TGME49_235635 | p.Ala170Ser  | missense_variant                               | hypothetical protein |
| TGME49_235660 | c.1498-7C>T  | splice_region_variant                          | hypothetical protein |
| TGME49_235660 | p.Phe64Leu   | missense_variant                               | hypothetical protein |
| TGME49_235660 | p.Gln49Arg   | missense_variant                               | hypothetical protein |
| TGME49_235660 | p.Ala22Thr   | missense_variant                               | hypothetical protein |
| TGME49_235660 | p.Ala12Val   | missense_variant                               | hypothetical protein |
| TGME49_235670 | p.Pro477Ser  | missense_variant                               | hypothetical protein |
| TGME49_235690 | c.-1045C>T   | 5_prime_UTR_premature_start_codon_gain_variant | hypothetical protein |
| TGME49_235710 | p.Leu18Arg   | missense_variant                               | hypothetical protein |
| TGME49_235720 | p.Pro364Gln  | missense_variant                               | hypothetical protein |
| TGME49_235730 | c.-149C>T    | 5_prime_UTR_premature_start_codon_gain_variant | hypothetical protein |
| TGME49_235740 | p.Val338Phe  | missense_variant                               | hypothetical protein |
| TGME49_235740 | p.Ser513Gly  | missense_variant                               | hypothetical protein |
| TGME49_235875 | c.-46A>G     | 5_prime_UTR_premature_start_codon_gain_variant | hypothetical protein |

|               |              |                                                |                      |
|---------------|--------------|------------------------------------------------|----------------------|
| TGME49_235875 | c.-215C>T    | 5_prime_UTR_premature_start_codon_gain_variant | hypothetical protein |
| TGME49_235875 | c.-753A>G    | 5_prime_UTR_premature_start_codon_gain_variant | hypothetical protein |
| TGME49_235960 | p.Val485Ala  | missense_variant                               | hypothetical protein |
| TGME49_235990 | p.Asp363Glu  | missense_variant                               | hypothetical protein |
| TGME49_235990 | c.-26+2T>G   | splice_donor_variant                           | hypothetical protein |
| TGME49_236060 | p.Met448Ile  | missense_variant                               | hypothetical protein |
| TGME49_236060 | p.Thr378Met  | missense_variant                               | hypothetical protein |
| TGME49_236060 | p.Ala231Val  | missense_variant                               | hypothetical protein |
| TGME49_236060 | p.Asp210Gly  | missense_variant                               | hypothetical protein |
| TGME49_236060 | p.Ser90Ala   | missense_variant                               | hypothetical protein |
| TGME49_236120 | p.Val102Phe  | missense_variant                               | hypothetical protein |
| TGME49_236120 | c.-55G>C     | 5_prime_UTR_premature_start_codon_gain_variant | hypothetical protein |
| TGME49_236120 | c.-118T>G    | 5_prime_UTR_premature_start_codon_gain_variant | hypothetical protein |
| TGME49_236140 | p.Arg414Ser  | missense_variant                               | hypothetical protein |
| TGME49_236140 | p.Ala485Ser  | missense_variant                               | hypothetical protein |
| TGME49_236140 | p.His733Tyr  | missense_variant                               | hypothetical protein |
| TGME49_236140 | p.Cys736Tyr  | missense_variant                               | hypothetical protein |
| TGME49_236150 | p.Lys2Arg    | missense_variant                               | hypothetical protein |
| TGME49_236150 | p.Leu110Val  | missense_variant                               | hypothetical protein |
| TGME49_236160 | p.Gly648Asp  | missense_variant                               | hypothetical protein |
| TGME49_236230 | p.His163Arg  | missense_variant                               | hypothetical protein |
| TGME49_236230 | p.Glu162Asp  | missense_variant                               | hypothetical protein |
| TGME49_236230 | c.-163C>T    | 5_prime_UTR_premature_start_codon_gain_variant | hypothetical protein |
| TGME49_236230 | c.-637C>T    | 5_prime_UTR_premature_start_codon_gain_variant | hypothetical protein |
| TGME49_236270 | c.-720T>G    | 5_prime_UTR_premature_start_codon_gain_variant | hypothetical protein |
| TGME49_236270 | c.-562C>G    | 5_prime_UTR_premature_start_codon_gain_variant | hypothetical protein |
| TGME49_236270 | c.-380C>G    | 5_prime_UTR_premature_start_codon_gain_variant | hypothetical protein |
| TGME49_236270 | c.-376C>G    | 5_prime_UTR_premature_start_codon_gain_variant | hypothetical protein |
| TGME49_236270 | c.-178C>T    | 5_prime_UTR_premature_start_codon_gain_variant | hypothetical protein |
| TGME49_236270 | p.Ile349Met  | missense_variant                               | hypothetical protein |
| TGME49_236270 | p.Pro363Ser  | missense_variant                               | hypothetical protein |
| TGME49_236290 | p.Ala272Val  | missense_variant                               | hypothetical protein |
| TGME49_236290 | p.Ser48Phe   | missense_variant                               | hypothetical protein |
| TGME49_236400 | c.*415C>T    | splice_region_variant                          | hypothetical protein |
| TGME49_236510 | p.Thr870Ala  | missense_variant                               | hypothetical protein |
| TGME49_236510 | p.Glu75Lys   | missense_variant                               | hypothetical protein |
| TGME49_236510 | p.Ser74Phe   | missense_variant                               | hypothetical protein |
| TGME49_236510 | p.Met16Val   | missense_variant                               | hypothetical protein |
| TGME49_236520 | c.-1506A>T   | 5_prime_UTR_premature_start_codon_gain_variant | hypothetical protein |
| TGME49_236550 | c.-392A>T    | 5_prime_UTR_premature_start_codon_gain_variant | hypothetical protein |
| TGME49_236560 | p.Pro224Ser  | missense_variant                               | hypothetical protein |
| TGME49_236560 | p.His790Arg  | missense_variant                               | hypothetical protein |
| TGME49_236560 | p.Met1061Lys | missense_variant                               | hypothetical protein |
| TGME49_236560 | p.Thr1463Ile | missense_variant                               | hypothetical protein |
| TGME49_236630 | p.Val42Ala   | missense_variant                               | hypothetical protein |
| TGME49_236670 | p.Thr313Arg  | missense_variant                               | hypothetical protein |
| TGME49_236670 | p.Ile440Met  | missense_variant                               | hypothetical protein |
| TGME49_236670 | p.Thr580Asn  | missense_variant                               | hypothetical protein |
| TGME49_236670 | p.Val587Met  | missense_variant                               | hypothetical protein |
| TGME49_236670 | p.Asp600Glu  | missense_variant                               | hypothetical protein |
| TGME49_236670 | p.Leu617Met  | missense_variant                               | hypothetical protein |
| TGME49_236670 | p.Val771Ile  | missense_variant                               | hypothetical protein |
| TGME49_236670 | p.Pro905His  | missense_variant                               | hypothetical protein |
| TGME49_236800 | p.Asp89Glu   | missense_variant                               | hypothetical protein |
| TGME49_236820 | p.Thr387Ala  | missense_variant                               | hypothetical protein |
| TGME49_236820 | p.Leu323Pro  | missense_variant                               | hypothetical protein |
| TGME49_236820 | p.Thr219Ile  | missense_variant                               | hypothetical protein |
| TGME49_236820 | p.Ala147Val  | missense_variant                               | hypothetical protein |
| TGME49_236830 | p.Ala38Thr   | missense_variant                               | hypothetical protein |
| TGME49_236850 | p.Ala67Thr   | missense_variant                               | hypothetical protein |
| TGME49_236850 | p.Thr221Asn  | missense_variant                               | hypothetical protein |
| TGME49_236850 | p.Lys613Glu  | missense_variant                               | hypothetical protein |
| TGME49_236850 | p.Lys918Asn  | missense_variant                               | hypothetical protein |
| TGME49_236850 | p.Asp1117Asn | missense_variant                               | hypothetical protein |
| TGME49_236850 | p.Ser1233Phe | missense_variant                               | hypothetical protein |
| TGME49_236850 | p.Arg1552Gln | missense_variant                               | hypothetical protein |
| TGME49_236850 | p.Thr1603Arg | missense_variant                               | hypothetical protein |
| TGME49_236850 | p.Ala1835Thr | missense_variant                               | hypothetical protein |
| TGME49_236850 | p.Ser1984Cys | missense_variant                               | hypothetical protein |
| TGME49_236850 | p.Glu2296Lys | missense_variant                               | hypothetical protein |
| TGME49_236850 | p.Gly2407Glu | missense_variant                               | hypothetical protein |
| TGME49_236850 | p.Val2650Ala | missense_variant                               | hypothetical protein |
| TGME49_236850 | p.Asn2701His | missense_variant                               | hypothetical protein |
| TGME49_236870 | p.Glu204Gln  | missense_variant                               | hypothetical protein |
| TGME49_236890 | p.Gln203Arg  | missense_variant                               | hypothetical protein |
| TGME49_236890 | p.Pro135Ser  | missense_variant                               | hypothetical protein |
| TGME49_236890 | p.Arg69Gly   | missense_variant                               | hypothetical protein |
| TGME49_236900 | c.405-7C>A   | splice_region_variant                          | hypothetical protein |
| TGME49_236920 | c.-243C>T    | 5_prime_UTR_premature_start_codon_gain_variant | hypothetical protein |
| TGME49_236930 | p.Ser5640Asn | missense_variant                               | hypothetical protein |
| TGME49_236930 | p.Cys5506Ser | missense_variant                               | hypothetical protein |
| TGME49_236930 | p.Thr3184Arg | missense_variant                               | hypothetical protein |
| TGME49_236930 | p.Thr2215Met | missense_variant                               | hypothetical protein |
| TGME49_236930 | p.Glu1303Lys | missense_variant                               | hypothetical protein |
| TGME49_236930 | p.Gly1091Arg | missense_variant                               | hypothetical protein |

|               |              |                                                |                      |
|---------------|--------------|------------------------------------------------|----------------------|
| TGME49_236930 | p.Arg651His  | missense_variant                               | hypothetical protein |
| TGME49_237015 | p.Ile141Val  | missense_variant                               | hypothetical protein |
| TGME49_237160 | c.3352-8T>G  | splice_region_variant                          | hypothetical protein |
| TGME49_237160 | p.Ser971Leu  | missense_variant                               | hypothetical protein |
| TGME49_237160 | p.Pro220Ser  | missense_variant                               | hypothetical protein |
| TGME49_237160 | c.-394T>G    | 5_prime_UTR_premature_start_codon_gain_variant | hypothetical protein |
| TGME49_237195 | p.Lys388Arg  | missense_variant                               | hypothetical protein |
| TGME49_237240 | c.-138T>G    | 5_prime_UTR_premature_start_codon_gain_variant | hypothetical protein |
| TGME49_237240 | c.-163A>T    | 5_prime_UTR_premature_start_codon_gain_variant | hypothetical protein |
| TGME49_237290 | p.Val201Ile  | missense_variant                               | hypothetical protein |
| TGME49_237290 | p.Gln1470His | missense_variant                               | hypothetical protein |
| TGME49_237290 | p.Arg957Gln  | missense_variant                               | hypothetical protein |
| TGME49_237290 | p.Ala49Thr   | missense_variant                               | hypothetical protein |
| TGME49_237290 | p.Leu39Pro   | missense_variant                               | hypothetical protein |
| TGME49_237290 | c.-249A>T    | 5_prime_UTR_premature_start_codon_gain_variant | hypothetical protein |
| TGME49_237290 | c.-629G>A    | 5_prime_UTR_premature_start_codon_gain_variant | hypothetical protein |
| TGME49_237450 | p.Pro94Ser   | missense_variant                               | hypothetical protein |
| TGME49_237450 | p.Ser42Trp   | missense_variant                               | hypothetical protein |
| TGME49_237450 | p.Asp18Ala   | missense_variant                               | hypothetical protein |
| TGME49_237460 | p.Pro440Thr  | missense_variant                               | hypothetical protein |
| TGME49_237460 | p.Asn325Ser  | missense_variant                               | hypothetical protein |
| TGME49_237460 | p.Cys279Gly  | missense_variant                               | hypothetical protein |
| TGME49_237460 | p.Ser72Phe   | missense_variant                               | hypothetical protein |
| TGME49_237460 | p.His19Tyr   | missense_variant                               | hypothetical protein |
| TGME49_237460 | c.-504T>G    | 5_prime_UTR_premature_start_codon_gain_variant | hypothetical protein |
| TGME49_237510 | p.His933Pro  | missense_variant                               | hypothetical protein |
| TGME49_237510 | p.Ser929Leu  | missense_variant                               | hypothetical protein |
| TGME49_237510 | p.Glu717Ala  | missense_variant                               | hypothetical protein |
| TGME49_237520 | p.Ser418Asn  | missense_variant                               | hypothetical protein |
| TGME49_237520 | p.Ala364Thr  | missense_variant                               | hypothetical protein |
| TGME49_237530 | p.Arg99Cys   | missense_variant                               | hypothetical protein |
| TGME49_237530 | p.Pro157Gln  | missense_variant                               | hypothetical protein |
| TGME49_237530 | p.Gln402His  | missense_variant                               | hypothetical protein |
| TGME49_237530 | p.Gly962Glu  | missense_variant                               | hypothetical protein |
| TGME49_237540 | p.Lys144Met  | missense_variant                               | hypothetical protein |
| TGME49_237550 | p.Leu1117Ile | missense_variant                               | hypothetical protein |
| TGME49_237585 | p.Ala1247Thr | missense_variant                               | hypothetical protein |
| TGME49_237585 | p.Asn830Ser  | missense_variant                               | hypothetical protein |
| TGME49_214070 | p.Val41Ala   | missense_variant                               | hypothetical protein |
| TGME49_214070 | p.Val41Phe   | missense_variant                               | hypothetical protein |
| TGME49_214115 | p.Val33Met   | missense_variant                               | hypothetical protein |
| TGME49_214120 | p.Ala1134Thr | missense_variant                               | hypothetical protein |
| TGME49_214130 | p.Lys3Glu    | missense_variant                               | hypothetical protein |
| TGME49_214130 | p.Glu127Gln  | missense_variant                               | hypothetical protein |
| TGME49_214130 | p.Val259Met  | missense_variant                               | hypothetical protein |
| TGME49_214130 | p.Met391Val  | missense_variant                               | hypothetical protein |
| TGME49_214130 | p.Pro805Leu  | missense_variant                               | hypothetical protein |
| TGME49_214130 | p.Ser841Ala  | missense_variant                               | hypothetical protein |
| TGME49_214130 | p.Ser1116Ala | missense_variant                               | hypothetical protein |
| TGME49_214130 | p.Arg1518Lys | missense_variant                               | hypothetical protein |
| TGME49_214130 | p.Ala1570Thr | missense_variant                               | hypothetical protein |
| TGME49_214140 | p.Pro511Ala  | missense_variant                               | hypothetical protein |
| TGME49_214140 | p.Ala554Thr  | missense_variant                               | hypothetical protein |
| TGME49_214140 | p.Gly789Cys  | missense_variant                               | hypothetical protein |
| TGME49_214140 | p.Gly1329Ser | missense_variant                               | hypothetical protein |
| TGME49_214170 | p.Gly578Ala  | missense_variant                               | hypothetical protein |
| TGME49_214170 | p.Ser679Phe  | missense_variant                               | hypothetical protein |
| TGME49_214170 | p.Ser683Phe  | missense_variant                               | hypothetical protein |
| TGME49_214295 | p.Ala42Ser   | missense_variant                               | hypothetical protein |
| TGME49_214300 | p.Met844Thr  | missense_variant                               | hypothetical protein |
| TGME49_214380 | p.Gly100Val  | missense_variant                               | hypothetical protein |
| TGME49_214430 | p.Thr370Ala  | missense_variant                               | hypothetical protein |
| TGME49_214430 | p.Ile436Val  | missense_variant                               | hypothetical protein |
| TGME49_214510 | p.Ser898Arg  | missense_variant                               | hypothetical protein |
| TGME49_214540 | p.Ala184Thr  | missense_variant                               | hypothetical protein |
| TGME49_214545 | p.Arg70Ser   | missense_variant                               | hypothetical protein |
| TGME49_214545 | p.Tyr54Cys   | missense_variant                               | hypothetical protein |
| TGME49_214560 | p.Ala836Val  | missense_variant                               | hypothetical protein |
| TGME49_214560 | p.Val105Leu  | missense_variant                               | hypothetical protein |
| TGME49_214570 | p.Gly400Arg  | missense_variant                               | hypothetical protein |
| TGME49_214600 | p.Thr3878Ala | missense_variant                               | hypothetical protein |
| TGME49_214600 | p.Ala3644Val | missense_variant                               | hypothetical protein |
| TGME49_214600 | p.Arg3270Cys | missense_variant                               | hypothetical protein |
| TGME49_214600 | p.Gly2946Asp | missense_variant                               | hypothetical protein |
| TGME49_214600 | p.Ser2602Leu | missense_variant                               | hypothetical protein |
| TGME49_214600 | p.Arg2503His | missense_variant                               | hypothetical protein |
| TGME49_214600 | p.Pro2457Gln | missense_variant                               | hypothetical protein |
| TGME49_214600 | p.Ser2445Thr | missense_variant                               | hypothetical protein |
| TGME49_214600 | p.Ser2360Gly | missense_variant                               | hypothetical protein |
| TGME49_214600 | p.Gly2265Arg | missense_variant                               | hypothetical protein |
| TGME49_214600 | p.Arg2050Ser | missense_variant                               | hypothetical protein |
| TGME49_214600 | p.His1965Tyr | missense_variant                               | hypothetical protein |
| TGME49_214600 | p.Asn1908Asp | missense_variant                               | hypothetical protein |
| TGME49_214600 | p.Gly1611Ser | missense_variant                               | hypothetical protein |
| TGME49_214600 | p.Thr1554Ala | missense_variant                               | hypothetical protein |

|               |              |                                                |                      |
|---------------|--------------|------------------------------------------------|----------------------|
| TGME49_214600 | p.Asp1429Gly | missense_variant                               | hypothetical protein |
| TGME49_214600 | p.Met1355Val | missense_variant                               | hypothetical protein |
| TGME49_214600 | p.Phe1296Leu | missense_variant                               | hypothetical protein |
| TGME49_214600 | p.Val1285Ala | missense_variant                               | hypothetical protein |
| TGME49_214600 | p.Ser1269Thr | missense_variant                               | hypothetical protein |
| TGME49_214600 | p.Gly706Asp  | missense_variant                               | hypothetical protein |
| TGME49_214600 | p.Gly446Cys  | missense_variant                               | hypothetical protein |
| TGME49_214600 | p.Ala411Gly  | missense_variant                               | hypothetical protein |
| TGME49_214600 | p.Ala372Ser  | missense_variant                               | hypothetical protein |
| TGME49_214600 | p.Asn353Asp  | missense_variant                               | hypothetical protein |
| TGME49_214600 | p.Arg270Trp  | missense_variant                               | hypothetical protein |
| TGME49_214600 | p.Leu211Val  | missense_variant                               | hypothetical protein |
| TGME49_214600 | c.-382C>G    | 5_prime_UTR_premature_start_codon_gain_variant | hypothetical protein |
| TGME49_214610 | p.Arg3303Gln | missense_variant                               | hypothetical protein |
| TGME49_214610 | p.Pro3276Ser | missense_variant                               | hypothetical protein |
| TGME49_214610 | p.Asp3043His | missense_variant                               | hypothetical protein |
| TGME49_214610 | p.Glu2660Gln | missense_variant                               | hypothetical protein |
| TGME49_214610 | p.Asp2655Glu | missense_variant                               | hypothetical protein |
| TGME49_214610 | p.Leu2581Val | missense_variant                               | hypothetical protein |
| TGME49_214610 | p.Pro2526Leu | missense_variant                               | hypothetical protein |
| TGME49_214610 | p.Gly2514Ser | missense_variant                               | hypothetical protein |
| TGME49_214610 | p.Pro2161Ser | missense_variant                               | hypothetical protein |
| TGME49_214610 | p.Ser1486Phe | missense_variant                               | hypothetical protein |
| TGME49_214610 | p.Leu1279Phe | missense_variant                               | hypothetical protein |
| TGME49_214610 | p.Ser655Pro  | missense_variant                               | hypothetical protein |
| TGME49_214610 | p.Ser649Pro  | missense_variant                               | hypothetical protein |
| TGME49_214610 | p.Tyr137Phe  | missense_variant                               | hypothetical protein |
| TGME49_214610 | c.-90T>G     | 5_prime_UTR_premature_start_codon_gain_variant | hypothetical protein |
| TGME49_214630 | p.Phe1371Val | missense_variant                               | hypothetical protein |
| TGME49_214630 | p.Ser1294Pro | missense_variant                               | hypothetical protein |
| TGME49_214630 | p.Phe1253Ile | missense_variant                               | hypothetical protein |
| TGME49_214630 | p.Gln986Pro  | missense_variant                               | hypothetical protein |
| TGME49_214630 | p.Arg716Trp  | missense_variant                               | hypothetical protein |
| TGME49_214630 | p.Gly656Asp  | missense_variant                               | hypothetical protein |
| TGME49_214630 | p.Cys618Arg  | missense_variant                               | hypothetical protein |
| TGME49_214630 | p.Ser555Pro  | missense_variant                               | hypothetical protein |
| TGME49_214630 | p.Thr539Ile  | missense_variant                               | hypothetical protein |
| TGME49_214630 | p.Ala45Gly   | missense_variant                               | hypothetical protein |
| TGME49_214630 | c.-711C>T    | 5_prime_UTR_premature_start_codon_gain_variant | hypothetical protein |
| TGME49_214740 | c.-2092C>G   | 5_prime_UTR_premature_start_codon_gain_variant | hypothetical protein |
| TGME49_214740 | c.-1751C>T   | 5_prime_UTR_premature_start_codon_gain_variant | hypothetical protein |
| TGME49_214740 | c.-1417C>T   | 5_prime_UTR_premature_start_codon_gain_variant | hypothetical protein |
| TGME49_214740 | c.-204C>G    | 5_prime_UTR_premature_start_codon_gain_variant | hypothetical protein |
| TGME49_214740 | p.Val92Met   | missense_variant                               | hypothetical protein |
| TGME49_214740 | p.Pro504Leu  | missense_variant                               | hypothetical protein |
| TGME49_214740 | p.Ala641Thr  | missense_variant                               | hypothetical protein |
| TGME49_214740 | p.Ser698Thr  | missense_variant                               | hypothetical protein |
| TGME49_214740 | p.Ser934Asn  | missense_variant                               | hypothetical protein |
| TGME49_214783 | p.Ala5Thr    | missense_variant                               | hypothetical protein |
| TGME49_214800 | p.Pro591Ser  | missense_variant                               | hypothetical protein |
| TGME49_214830 | p.Ser21Pro   | missense_variant                               | hypothetical protein |
| TGME49_214830 | p.Gln97Arg   | missense_variant                               | hypothetical protein |
| TGME49_214830 | p.Asp100Asn  | missense_variant                               | hypothetical protein |
| TGME49_214830 | p.Ser138Leu  | missense_variant                               | hypothetical protein |
| TGME49_214830 | p.Pro307Thr  | missense_variant                               | hypothetical protein |
| TGME49_214830 | c.2742+7C>T  | splice_region_variant                          | hypothetical protein |
| TGME49_214830 | c.4456-7T>C  | splice_region_variant                          | hypothetical protein |
| TGME49_214880 | p.Ser559Tyr  | missense_variant                               | hypothetical protein |
| TGME49_214880 | p.Gly556Glu  | missense_variant                               | hypothetical protein |
| TGME49_214880 | p.Ser197Pro  | missense_variant                               | hypothetical protein |
| TGME49_214880 | p.Phe123Val  | missense_variant                               | hypothetical protein |
| TGME49_214900 | p.Leu411Val  | missense_variant                               | hypothetical protein |
| TGME49_214900 | p.Ser521Pro  | missense_variant                               | hypothetical protein |
| TGME49_214900 | p.Ser552Ala  | missense_variant                               | hypothetical protein |
| TGME49_214900 | p.Thr751Ala  | missense_variant                               | hypothetical protein |
| TGME49_214900 | p.Pro876Leu  | missense_variant                               | hypothetical protein |
| TGME49_214900 | p.Gly1730Ala | missense_variant                               | hypothetical protein |
| TGME49_214900 | p.Arg1776Lys | missense_variant                               | hypothetical protein |
| TGME49_214900 | p.Thr1796Ala | missense_variant                               | hypothetical protein |
| TGME49_214910 | p.Thr501Ala  | missense_variant                               | hypothetical protein |
| TGME49_214910 | p.Ala478Val  | missense_variant                               | hypothetical protein |
| TGME49_214910 | p.Leu360Met  | missense_variant                               | hypothetical protein |
| TGME49_214910 | p.Phe10Leu   | missense_variant                               | hypothetical protein |
| TGME49_214980 | p.Ala768Thr  | missense_variant                               | hypothetical protein |
| TGME49_214990 | p.Pro3430Ser | missense_variant                               | hypothetical protein |
| TGME49_214990 | p.Pro2922Ser | missense_variant                               | hypothetical protein |
| TGME49_214990 | p.Ala2764Thr | missense_variant                               | hypothetical protein |
| TGME49_214990 | p.Pro2721Ala | missense_variant                               | hypothetical protein |
| TGME49_214990 | p.Thr2517Ala | missense_variant                               | hypothetical protein |
| TGME49_214990 | p.Leu2064Ile | missense_variant                               | hypothetical protein |
| TGME49_214990 | p.Glu1261Lys | missense_variant                               | hypothetical protein |
| TGME49_214990 | p.Met1063Ile | missense_variant                               | hypothetical protein |
| TGME49_214990 | p.Asp1061Glu | missense_variant                               | hypothetical protein |
| TGME49_214990 | p.Pro1004His | missense_variant                               | hypothetical protein |
| TGME49_214990 | p.Ser330Ala  | missense_variant                               | hypothetical protein |



|               |              |                                                |                      |
|---------------|--------------|------------------------------------------------|----------------------|
| TGME49_214990 | p.Ser322Ala  | missense_variant                               | hypothetical protein |
| TGME49_214990 | p.Leu234Val  | missense_variant                               | hypothetical protein |
| TGME49_215010 | c.-1191C>T   | 5_prime_UTR_premature_start_codon_gain_variant | hypothetical protein |
| TGME49_215010 | p.Pro56Arg   | missense_variant                               | hypothetical protein |
| TGME49_215010 | p.Ala176Gly  | missense_variant                               | hypothetical protein |
| TGME49_215010 | p.Thr758Met  | missense_variant                               | hypothetical protein |
| TGME49_215020 | p.Ile92Ser   | missense_variant                               | hypothetical protein |
| TGME49_215020 | c.-558G>T    | 5_prime_UTR_premature_start_codon_gain_variant | hypothetical protein |
| TGME49_215030 | p.Ser202Asn  | missense_variant                               | hypothetical protein |
| TGME49_215030 | p.Ile234Thr  | missense_variant                               | hypothetical protein |
| TGME49_215030 | p.Ala789Val  | missense_variant                               | hypothetical protein |
| TGME49_215030 | p.Ala815Ser  | missense_variant                               | hypothetical protein |
| TGME49_215030 | p.Gly879Arg  | missense_variant                               | hypothetical protein |
| TGME49_215030 | p.Asn1434His | missense_variant                               | hypothetical protein |
| TGME49_215030 | p.Ala1488Pro | missense_variant                               | hypothetical protein |
| TGME49_215050 | p.Ile121Met  | missense_variant                               | hypothetical protein |
| TGME49_215055 | p.Arg57Lys   | missense_variant                               | hypothetical protein |
| TGME49_215080 | p.Glu3229Asp | missense_variant                               | hypothetical protein |
| TGME49_215080 | p.Ser3071Cys | missense_variant                               | hypothetical protein |
| TGME49_215080 | p.Asp3026Glu | missense_variant                               | hypothetical protein |
| TGME49_215080 | p.Val2498Ile | missense_variant                               | hypothetical protein |
| TGME49_215080 | p.Trp1955Cys | missense_variant                               | hypothetical protein |
| TGME49_215080 | p.Ser1359Ala | missense_variant                               | hypothetical protein |
| TGME49_215080 | p.Gly1355Asp | missense_variant                               | hypothetical protein |
| TGME49_215080 | p.Leu1183Val | missense_variant                               | hypothetical protein |
| TGME49_215080 | p.Ala838Val  | missense_variant                               | hypothetical protein |
| TGME49_215080 | p.Val350Leu  | missense_variant                               | hypothetical protein |
| TGME49_215080 | p.Pro33Arg   | missense_variant                               | hypothetical protein |
| TGME49_215140 | p.Ile65Phe   | missense_variant                               | hypothetical protein |
| TGME49_215160 | c.-2866G>T   | 5_prime_UTR_premature_start_codon_gain_variant | hypothetical protein |
| TGME49_215300 | p.Glu152Asp  | missense_variant                               | hypothetical protein |
| TGME49_215320 | p.Pro250Ser  | missense_variant                               | hypothetical protein |
| TGME49_215328 | c.1988-7C>T  | splice_region_variant                          | hypothetical protein |
| TGME49_215328 | p.Thr393Lys  | missense_variant                               | hypothetical protein |
| TGME49_215343 | p.Leu566Phe  | missense_variant                               | hypothetical protein |
| TGME49_215347 | p.Leu69Val   | missense_variant                               | hypothetical protein |
| TGME49_215370 | p.Arg122Gly  | missense_variant                               | hypothetical protein |
| TGME49_215370 | p.Ala192Ser  | missense_variant                               | hypothetical protein |
| TGME49_215370 | p.Asn746His  | missense_variant                               | hypothetical protein |
| TGME49_215380 | p.Ser583Thr  | missense_variant                               | hypothetical protein |
| TGME49_215380 | p.Val383Ala  | missense_variant                               | hypothetical protein |
| TGME49_215380 | p.Thr292Ala  | missense_variant                               | hypothetical protein |
| TGME49_215380 | p.Gln171Arg  | missense_variant                               | hypothetical protein |
| TGME49_215540 | p.Thr100Ile  | missense_variant                               | hypothetical protein |
| TGME49_215550 | p.Lys1446Thr | missense_variant                               | hypothetical protein |
| TGME49_215550 | p.Trp1351Cys | missense_variant                               | hypothetical protein |
| TGME49_215550 | p.Val1291Glu | missense_variant                               | hypothetical protein |
| TGME49_215550 | p.Val488Ala  | missense_variant                               | hypothetical protein |
| TGME49_215550 | p.Thr471Ser  | missense_variant                               | hypothetical protein |
| TGME49_215550 | p.Ser274Pro  | missense_variant                               | hypothetical protein |
| TGME49_215550 | p.Thr172Ile  | missense_variant                               | hypothetical protein |
| TGME49_215580 | p.Cys108Arg  | missense_variant                               | hypothetical protein |
| TGME49_215580 | p.Phe24Leu   | missense_variant                               | hypothetical protein |
| TGME49_215620 | c.-251T>G    | 5_prime_UTR_premature_start_codon_gain_variant | hypothetical protein |
| TGME49_215620 | p.Ser164Leu  | missense_variant                               | hypothetical protein |
| TGME49_215620 | p.Ser174Phe  | missense_variant                               | hypothetical protein |
| TGME49_215620 | p.Arg657Cys  | missense_variant                               | hypothetical protein |
| TGME49_215620 | p.Pro1280Ser | missense_variant                               | hypothetical protein |
| TGME49_215620 | p.Ala1451Val | missense_variant                               | hypothetical protein |
| TGME49_215660 | c.-593C>G    | 5_prime_UTR_premature_start_codon_gain_variant | hypothetical protein |
| TGME49_215660 | c.-581C>T    | 5_prime_UTR_premature_start_codon_gain_variant | hypothetical protein |
| TGME49_215660 | c.-240C>T    | 5_prime_UTR_premature_start_codon_gain_variant | hypothetical protein |
| TGME49_215660 | p.Ala168Thr  | missense_variant                               | hypothetical protein |
| TGME49_215660 | p.Asn206Tyr  | missense_variant                               | hypothetical protein |
| TGME49_215660 | p.Ser280Pro  | missense_variant                               | hypothetical protein |
| TGME49_215660 | p.Arg591Thr  | missense_variant                               | hypothetical protein |
| TGME49_215690 | p.Asp246Glu  | missense_variant                               | hypothetical protein |
| TGME49_215690 | p.Ala275Ser  | missense_variant                               | hypothetical protein |
| TGME49_215690 | p.Ser450Gly  | missense_variant                               | hypothetical protein |
| TGME49_215690 | p.Lys645Thr  | missense_variant                               | hypothetical protein |
| TGME49_215690 | p.Asp1426Glu | missense_variant                               | hypothetical protein |
| TGME49_215710 | c.-29C>G     | 5_prime_UTR_premature_start_codon_gain_variant | hypothetical protein |
| TGME49_215710 | p.Pro133Gln  | missense_variant                               | hypothetical protein |
| TGME49_275430 | c.-1049C>T   | 5_prime_UTR_premature_start_codon_gain_variant | hypothetical protein |
| TGME49_275430 | p.Leu770Val  | missense_variant                               | hypothetical protein |
| TGME49_275430 | p.Ser1144Asn | missense_variant                               | hypothetical protein |
| TGME49_275430 | p.Val1777Ile | missense_variant                               | hypothetical protein |
| TGME49_275430 | p.Val2160Ala | missense_variant                               | hypothetical protein |
| TGME49_275430 | p.Arg2384Cys | missense_variant                               | hypothetical protein |
| TGME49_275430 | p.Ala2552Val | missense_variant                               | hypothetical protein |
| TGME49_275430 | p.Ser2583Thr | missense_variant                               | hypothetical protein |
| TGME49_275450 | p.Val811Ala  | missense_variant                               | hypothetical protein |
| TGME49_275450 | p.Thr636Ser  | missense_variant                               | hypothetical protein |
| TGME49_275450 | p.Asn246Ser  | missense_variant                               | hypothetical protein |
| TGME49_275450 | p.Ser132Phe  | missense_variant                               | hypothetical protein |

|               |              |                                                |                      |
|---------------|--------------|------------------------------------------------|----------------------|
| TGME49_275450 | p.Ala99Ser   | missense_variant                               | hypothetical protein |
| TGME49_275490 | p.Ser919Arg  | missense_variant                               | hypothetical protein |
| TGME49_275490 | p.His365Arg  | missense_variant                               | hypothetical protein |
| TGME49_275490 | p.Asp87Asn   | missense_variant                               | hypothetical protein |
| TGME49_207030 | c.*250C>T    | splice_region_variant                          | hypothetical protein |
| TGME49_207040 | p.Ala1105Pro | missense_variant                               | hypothetical protein |
| TGME49_207050 | p.Ile297Leu  | missense_variant                               | hypothetical protein |
| TGME49_207050 | p.Pro239Leu  | missense_variant                               | hypothetical protein |
| TGME49_207065 | p.Leu34Val   | missense_variant                               | hypothetical protein |
| TGME49_207100 | p.Val1148Ile | missense_variant                               | hypothetical protein |
| TGME49_207100 | p.Pro1021Ser | missense_variant                               | hypothetical protein |
| TGME49_207100 | p.Val647Ala  | missense_variant                               | hypothetical protein |
| TGME49_207100 | p.Pro414Arg  | missense_variant                               | hypothetical protein |
| TGME49_207100 | p.Asp109Glu  | missense_variant                               | hypothetical protein |
| TGME49_207110 | p.Lys235Glu  | missense_variant                               | hypothetical protein |
| TGME49_207110 | p.Met1?      | start_lost                                     | hypothetical protein |
| TGME49_207170 | c.-20C>T     | 5_prime_UTR_premature_start_codon_gain_variant | hypothetical protein |
| TGME49_207170 | p.Val119Ile  | missense_variant                               | hypothetical protein |
| TGME49_207200 | p.Arg1535Gln | missense_variant                               | hypothetical protein |
| TGME49_207200 | p.Met1240Val | missense_variant                               | hypothetical protein |
| TGME49_207200 | p.His969Pro  | missense_variant                               | hypothetical protein |
| TGME49_207200 | p.Ser274Ala  | missense_variant                               | hypothetical protein |
| TGME49_207230 | p.Thr1061Ser | missense_variant                               | hypothetical protein |
| TGME49_207230 | p.His828Pro  | missense_variant                               | hypothetical protein |
| TGME49_207240 | c.-166A>T    | 5_prime_UTR_premature_start_codon_gain_variant | hypothetical protein |
| TGME49_207240 | p.Asn77Ser   | missense_variant                               | hypothetical protein |
| TGME49_311230 | p.Arg3096Gln | missense_variant                               | hypothetical protein |
| TGME49_312700 | p.Ser2569Ala | missense_variant                               | hypothetical protein |
| TGME49_300330 | p.Val9Leu    | missense_variant                               | hypothetical protein |
| TGME49_300330 | p.Arg228Lys  | missense_variant                               | hypothetical protein |
| TGME49_300330 | p.Gly997Ser  | missense_variant                               | hypothetical protein |
| TGME49_300330 | p.Gly1109Ser | missense_variant                               | hypothetical protein |
| TGME49_300270 | c.-2222C>G   | 5_prime_UTR_premature_start_codon_gain_variant | hypothetical protein |
| TGME49_300270 | c.-1995C>G   | 5_prime_UTR_premature_start_codon_gain_variant | hypothetical protein |
| TGME49_300270 | c.-491C>T    | 5_prime_UTR_premature_start_codon_gain_variant | hypothetical protein |
| TGME49_300220 | p.Val1689Met | missense_variant                               | hypothetical protein |
| TGME49_300220 | p.Asn1513Ser | missense_variant                               | hypothetical protein |
| TGME49_300220 | p.Asn15Ser   | missense_variant                               | hypothetical protein |
| TGME49_300180 | p.Gly94Val   | missense_variant                               | hypothetical protein |
| TGME49_300180 | p.Ser46Ala   | missense_variant                               | hypothetical protein |
| TGME49_300160 | p.Ala159Val  | missense_variant                               | hypothetical protein |
| TGME49_300160 | p.Glu280Ala  | missense_variant                               | hypothetical protein |
| TGME49_300160 | p.Glu353Val  | missense_variant                               | hypothetical protein |
| TGME49_300110 | c.-563C>T    | 5_prime_UTR_premature_start_codon_gain_variant | hypothetical protein |
| TGME49_300110 | c.-272C>G    | 5_prime_UTR_premature_start_codon_gain_variant | hypothetical protein |
| TGME49_300090 | p.Asp25His   | missense_variant                               | hypothetical protein |
| TGME49_300090 | p.Pro74Ser   | missense_variant                               | hypothetical protein |
| TGME49_300090 | p.Leu111Phe  | missense_variant                               | hypothetical protein |
| TGME49_300090 | p.Ser113Leu  | missense_variant                               | hypothetical protein |
| TGME49_300080 | c.*24C>T     | splice_region_variant                          | hypothetical protein |
| TGME49_300080 | p.Glu48Ala   | missense_variant                               | hypothetical protein |
| TGME49_300055 | p.Ser165Tyr  | missense_variant                               | hypothetical protein |
| TGME49_300055 | p.Ser153Phe  | missense_variant                               | hypothetical protein |
| TGME49_300052 | p.Val40Gly   | missense_variant                               | hypothetical protein |
| TGME49_300048 | p.Asn272Asp  | missense_variant                               | hypothetical protein |
| TGME49_300048 | p.Phe19Ser   | missense_variant                               | hypothetical protein |
| TGME49_300030 | p.Asp326His  | missense_variant                               | hypothetical protein |
| TGME49_300030 | p.Ala225Ser  | missense_variant                               | hypothetical protein |
| TGME49_300010 | p.Glu279Asp  | missense_variant                               | hypothetical protein |
| TGME49_300010 | p.Ala277Glu  | missense_variant                               | hypothetical protein |
| TGME49_299995 | p.Arg50Thr   | missense_variant                               | hypothetical protein |
| TGME49_299980 | p.Gln156Arg  | missense_variant                               | hypothetical protein |
| TGME49_299780 | p.Pro287Ala  | missense_variant                               | hypothetical protein |
| TGME49_299670 | p.Thr370Ser  | missense_variant                               | hypothetical protein |
| TGME49_307820 | c.74-4C>T    | splice_region_variant                          | hypothetical protein |
| TGME49_307820 | p.Glu36Lys   | missense_variant                               | hypothetical protein |
| TGME49_307860 | p.Ser39Leu   | missense_variant                               | hypothetical protein |
| TGME49_307860 | p.Glu99Asp   | missense_variant                               | hypothetical protein |
| TGME49_307860 | p.Pro1041Ala | missense_variant                               | hypothetical protein |
| TGME49_307860 | p.Cys1273Tyr | missense_variant                               | hypothetical protein |
| TGME49_307860 | p.Gly1589Val | missense_variant                               | hypothetical protein |
| TGME49_307860 | p.Glu2322Asp | missense_variant                               | hypothetical protein |
| TGME49_307860 | p.Pro2905Ala | missense_variant                               | hypothetical protein |
| TGME49_307860 | p.Arg2926His | missense_variant                               | hypothetical protein |
| TGME49_307860 | p.Ala2930Gly | missense_variant                               | hypothetical protein |
| TGME49_307860 | p.Ile3284Ser | missense_variant                               | hypothetical protein |
| TGME49_307860 | p.Leu3803Val | missense_variant                               | hypothetical protein |
| TGME49_307860 | p.Gln3876Glu | missense_variant                               | hypothetical protein |
| TGME49_307860 | p.Thr3897Met | missense_variant                               | hypothetical protein |
| TGME49_308010 | c.*549C>A    | splice_region_variant                          | hypothetical protein |
| TGME49_308010 | p.Ala1139Gly | missense_variant                               | hypothetical protein |
| TGME49_308010 | p.Glu881Gln  | missense_variant                               | hypothetical protein |
| TGME49_308010 | p.Glu839Gln  | missense_variant                               | hypothetical protein |
| TGME49_308010 | p.Lys687Asn  | missense_variant                               | hypothetical protein |
| TGME49_308010 | p.Ala378Ser  | missense_variant                               | hypothetical protein |

|               |              |                                                |                      |
|---------------|--------------|------------------------------------------------|----------------------|
| TGME49_308010 | c.-733T>C    | 5_prime_UTR_premature_start_codon_gain_variant | hypothetical protein |
| TGME49_308030 | p.Ile17Val   | missense_variant                               | hypothetical protein |
| TGME49_308030 | p.Ile813Thr  | missense_variant                               | hypothetical protein |
| TGME49_308030 | c.2637+8T>C  | splice_region_variant                          | hypothetical protein |
| TGME49_308060 | p.Asp89Ala   | missense_variant                               | hypothetical protein |
| TGME49_308060 | p.Phe1483Leu | missense_variant                               | hypothetical protein |
| TGME49_308060 | p.Gln1829Glu | missense_variant                               | hypothetical protein |
| TGME49_308070 | p.Ala1212Val | missense_variant                               | hypothetical protein |
| TGME49_219810 | p.Thr410Ser  | missense_variant                               | hypothetical protein |
| TGME49_219742 | p.Pro27Ser   | missense_variant                               | hypothetical protein |
| TGME49_219742 | p.Gly192Glu  | missense_variant                               | hypothetical protein |
| TGME49_219738 | p.Leu129Arg  | missense_variant                               | hypothetical protein |
| TGME49_219738 | p.Arg318Gln  | missense_variant                               | hypothetical protein |
| TGME49_219738 | p.Asp803Glu  | missense_variant                               | hypothetical protein |
| TGME49_219738 | p.Val817Phe  | missense_variant                               | hypothetical protein |
| TGME49_219738 | p.Thr1478Lys | missense_variant                               | hypothetical protein |
| TGME49_219738 | p.Ala1650Glu | missense_variant                               | hypothetical protein |
| TGME49_219738 | p.Pro1682Ser | missense_variant                               | hypothetical protein |
| TGME49_219738 | p.Thr1756Ala | missense_variant                               | hypothetical protein |
| TGME49_219738 | p.Lys1874Arg | missense_variant                               | hypothetical protein |
| TGME49_219738 | p.Leu1877Arg | missense_variant                               | hypothetical protein |
| TGME49_219738 | p.Val1927Ala | missense_variant                               | hypothetical protein |
| TGME49_219738 | p.Leu1977Ile | missense_variant                               | hypothetical protein |
| TGME49_219738 | p.Val2238Ala | missense_variant                               | hypothetical protein |
| TGME49_219738 | p.Ala2273Thr | missense_variant                               | hypothetical protein |
| TGME49_219738 | p.Leu2311Ile | missense_variant                               | hypothetical protein |
| TGME49_219738 | p.Met2484Ile | missense_variant                               | hypothetical protein |
| TGME49_219730 | c.-604A>G    | 5_prime_UTR_premature_start_codon_gain_variant | hypothetical protein |
| TGME49_219730 | c.-442T>G    | 5_prime_UTR_premature_start_codon_gain_variant | hypothetical protein |
| TGME49_219730 | p.Glu111Lys  | missense_variant                               | hypothetical protein |
| TGME49_219730 | p.Glu137Asp  | missense_variant                               | hypothetical protein |
| TGME49_219730 | p.Gly173Arg  | missense_variant                               | hypothetical protein |
| TGME49_219730 | p.Ser286Asn  | missense_variant                               | hypothetical protein |
| TGME49_219730 | p.Ser316Arg  | missense_variant                               | hypothetical protein |
| TGME49_219710 | p.His1323Gln | missense_variant                               | hypothetical protein |
| TGME49_219710 | p.Gly817Ser  | missense_variant                               | hypothetical protein |
| TGME49_219678 | c.-218A>C    | 5_prime_UTR_premature_start_codon_gain_variant | hypothetical protein |
| TGME49_219678 | p.Gly390Arg  | missense_variant                               | hypothetical protein |
| TGME49_219678 | p.Ser443Asn  | missense_variant                               | hypothetical protein |
| TGME49_219660 | p.His3840Arg | missense_variant                               | hypothetical protein |
| TGME49_219660 | p.Ala2912Val | missense_variant                               | hypothetical protein |
| TGME49_219660 | p.Pro2278Thr | missense_variant                               | hypothetical protein |
| TGME49_219660 | p.Thr1481Ile | missense_variant                               | hypothetical protein |
| TGME49_219660 | p.Ala1068Gly | missense_variant                               | hypothetical protein |
| TGME49_219640 | p.Ala192Val  | missense_variant                               | hypothetical protein |
| TGME49_219640 | p.Gly219Arg  | missense_variant                               | hypothetical protein |
| TGME49_219640 | p.Glu924Asp  | missense_variant                               | hypothetical protein |
| TGME49_219640 | p.Gln1125His | missense_variant                               | hypothetical protein |
| TGME49_219640 | p.Glu1260Gly | missense_variant                               | hypothetical protein |
| TGME49_219640 | p.Leu1699Val | missense_variant                               | hypothetical protein |
| TGME49_219640 | c.*485G>A    | splice_region_variant                          | hypothetical protein |
| TGME49_219620 | p.His247Asp  | missense_variant                               | hypothetical protein |
| TGME49_219620 | p.Ser112Pro  | missense_variant                               | hypothetical protein |
| TGME49_219620 | c.-140C>T    | 5_prime_UTR_premature_start_codon_gain_variant | hypothetical protein |
| TGME49_219610 | p.Val74Leu   | missense_variant                               | hypothetical protein |
| TGME49_219610 | p.Ala105Val  | missense_variant                               | hypothetical protein |
| TGME49_219610 | c.388-6T>C   | splice_region_variant                          | hypothetical protein |
| TGME49_219610 | p.Arg168Gly  | missense_variant                               | hypothetical protein |
| TGME49_219610 | p.Arg174Gly  | missense_variant                               | hypothetical protein |
| TGME49_219610 | p.Ala203Thr  | missense_variant                               | hypothetical protein |
| TGME49_219600 | c.-773A>C    | 5_prime_UTR_premature_start_codon_gain_variant | hypothetical protein |
| TGME49_219600 | p.Val92Met   | missense_variant                               | hypothetical protein |
| TGME49_219600 | p.Ala199Gly  | missense_variant                               | hypothetical protein |
| TGME49_219600 | p.Gln419Arg  | missense_variant                               | hypothetical protein |
| TGME49_219600 | p.Ala554Ser  | missense_variant                               | hypothetical protein |
| TGME49_219600 | p.Ser566Leu  | missense_variant                               | hypothetical protein |
| TGME49_219600 | p.Gly771Arg  | missense_variant                               | hypothetical protein |
| TGME49_219600 | p.Ala784Asp  | missense_variant                               | hypothetical protein |
| TGME49_219570 | c.-501G>T    | 5_prime_UTR_premature_start_codon_gain_variant | hypothetical protein |
| TGME49_219530 | p.Gln216Arg  | missense_variant                               | hypothetical protein |
| TGME49_219530 | p.Arg23Lys   | missense_variant                               | hypothetical protein |
| TGME49_219530 | p.Glu15Lys   | missense_variant                               | hypothetical protein |
| TGME49_219530 | c.-421C>T    | 5_prime_UTR_premature_start_codon_gain_variant | hypothetical protein |
| TGME49_219500 | c.967-6C>T   | splice_region_variant                          | hypothetical protein |
| TGME49_219485 | p.Asn2327Lys | missense_variant                               | hypothetical protein |
| TGME49_219485 | p.Ala2016Val | missense_variant                               | hypothetical protein |
| TGME49_219485 | p.Ser1102Ala | missense_variant                               | hypothetical protein |
| TGME49_219485 | p.Gly741Ser  | missense_variant                               | hypothetical protein |
| TGME49_219485 | p.Gly543Glu  | missense_variant                               | hypothetical protein |
| TGME49_219485 | p.Asp389Gly  | missense_variant                               | hypothetical protein |
| TGME49_219485 | p.Ala216Ser  | missense_variant                               | hypothetical protein |
| TGME49_219485 | p.Ala211Thr  | missense_variant                               | hypothetical protein |
| TGME49_219485 | p.Leu122Pro  | missense_variant                               | hypothetical protein |
| TGME49_219485 | p.Arg98Ser   | missense_variant                               | hypothetical protein |
| TGME49_219485 | c.-770G>A    | 5_prime_UTR_premature_start_codon_gain_variant | hypothetical protein |

|               |              |                                                |                      |
|---------------|--------------|------------------------------------------------|----------------------|
| TGME49_219460 | p.Pro661Ser  | missense_variant                               | hypothetical protein |
| TGME49_219460 | p.Glu662Gly  | missense_variant                               | hypothetical protein |
| TGME49_219460 | p.Ala773Ser  | missense_variant                               | hypothetical protein |
| TGME49_219460 | p.Thr834Ser  | missense_variant                               | hypothetical protein |
| TGME49_219440 | p.His670Leu  | missense_variant                               | hypothetical protein |
| TGME49_219222 | p.Lys148Arg  | missense_variant                               | hypothetical protein |
| TGME49_219218 | p.Arg1366Gly | missense_variant                               | hypothetical protein |
| TGME49_219218 | p.Glu1334Gly | missense_variant                               | hypothetical protein |
| TGME49_219218 | p.Gly986Ala  | missense_variant                               | hypothetical protein |
| TGME49_219218 | c.-1588T>G   | 5_prime_UTR_premature_start_codon_gain_variant | hypothetical protein |
| TGME49_219218 | c.-2167C>T   | 5_prime_UTR_premature_start_codon_gain_variant | hypothetical protein |
| TGME49_219218 | c.-3391G>A   | 5_prime_UTR_premature_start_codon_gain_variant | hypothetical protein |
| TGME49_219160 | c.-186G>T    | 5_prime_UTR_premature_start_codon_gain_variant | hypothetical protein |
| TGME49_219160 | c.268+6G>T   | splice_region_variant                          | hypothetical protein |
| TGME49_219110 | p.Thr238Ala  | missense_variant                               | hypothetical protein |
| TGME49_219110 | p.Glu186Lys  | missense_variant                               | hypothetical protein |
| TGME49_219110 | p.Ile164Thr  | missense_variant                               | hypothetical protein |
| TGME49_219110 | c.213+6T>C   | splice_region_variant                          | hypothetical protein |
| TGME49_219110 | c.174+3A>G   | splice_region_variant                          | hypothetical protein |
| TGME49_218950 | p.Ala1152Ser | missense_variant                               | hypothetical protein |
| TGME49_218950 | p.Phe731Ile  | missense_variant                               | hypothetical protein |
| TGME49_218950 | p.Ala678Thr  | missense_variant                               | hypothetical protein |
| TGME49_218950 | c.1905+6G>A  | splice_region_variant                          | hypothetical protein |
| TGME49_218950 | p.Glu551Val  | missense_variant                               | hypothetical protein |
| TGME49_218950 | p.Ser237Phe  | missense_variant                               | hypothetical protein |
| TGME49_218950 | p.Gly207Asp  | missense_variant                               | hypothetical protein |
| TGME49_218940 | p.Gly9Ala    | missense_variant                               | hypothetical protein |
| TGME49_218940 | p.Gln67*     | stop_gained                                    | hypothetical protein |
| TGME49_218940 | c.205+8G>A   | splice_region_variant                          | hypothetical protein |
| TGME49_218950 | c.-365G>T    | 5_prime_UTR_premature_start_codon_gain_variant | hypothetical protein |
| TGME49_218940 | p.Ala138Val  | missense_variant                               | hypothetical protein |
| TGME49_218910 | p.Asp538Asn  | missense_variant                               | hypothetical protein |
| TGME49_218910 | p.Asp491Gly  | missense_variant                               | hypothetical protein |
| TGME49_218900 | p.Ala90Gly   | missense_variant                               | hypothetical protein |
| TGME49_218900 | p.Thr666Ala  | missense_variant                               | hypothetical protein |
| TGME49_218890 | p.Gly651Ser  | missense_variant                               | hypothetical protein |
| TGME49_218860 | p.Gly173Arg  | missense_variant                               | hypothetical protein |
| TGME49_218830 | p.Ser627Phe  | missense_variant                               | hypothetical protein |
| TGME49_218830 | p.Leu76Val   | missense_variant                               | hypothetical protein |
| TGME49_218800 | p.Glu883Asp  | missense_variant                               | hypothetical protein |
| TGME49_218800 | c.2161-5T>C  | splice_region_variant                          | hypothetical protein |
| TGME49_218800 | p.Pro605Ala  | missense_variant                               | hypothetical protein |
| TGME49_218800 | p.Pro389Leu  | missense_variant                               | hypothetical protein |
| TGME49_218800 | p.Arg126Leu  | missense_variant                               | hypothetical protein |
| TGME49_218800 | p.Pro113Ser  | missense_variant                               | hypothetical protein |
| TGME49_218800 | p.Gly107Arg  | missense_variant                               | hypothetical protein |
| TGME49_218800 | p.His5Gln    | missense_variant                               | hypothetical protein |
| TGME49_218750 | p.Asn268Asp  | missense_variant                               | hypothetical protein |
| TGME49_218750 | p.Ala226Thr  | missense_variant                               | hypothetical protein |
| TGME49_218750 | p.Asn130Lys  | missense_variant                               | hypothetical protein |
| TGME49_218750 | c.-1654G>A   | 5_prime_UTR_premature_start_codon_gain_variant | hypothetical protein |
| TGME49_218730 | p.Gly207Arg  | missense_variant                               | hypothetical protein |
| TGME49_218500 | p.Lys1362Glu | missense_variant                               | hypothetical protein |
| TGME49_218500 | p.Ser425Asn  | missense_variant                               | hypothetical protein |
| TGME49_218490 | p.Lys1618Gln | missense_variant                               | hypothetical protein |
| TGME49_218490 | p.Val1509Ile | missense_variant                               | hypothetical protein |
| TGME49_218490 | c.1297+7G>A  | splice_region_variant                          | hypothetical protein |
| TGME49_218490 | p.Arg404Gln  | missense_variant                               | hypothetical protein |
| TGME49_218490 | p.Ala308Val  | missense_variant                               | hypothetical protein |
| TGME49_218490 | p.Ser105Pro  | missense_variant                               | hypothetical protein |
| TGME49_218490 | p.Arg67Leu   | missense_variant                               | hypothetical protein |
| TGME49_218460 | p.Gly12Val   | missense_variant                               | hypothetical protein |
| TGME49_218460 | p.Gln161His  | missense_variant                               | hypothetical protein |
| TGME49_218450 | p.Met125Val  | missense_variant                               | hypothetical protein |
| TGME49_218450 | p.Ala263Pro  | missense_variant                               | hypothetical protein |
| TGME49_218450 | p.Gly288Asp  | missense_variant                               | hypothetical protein |
| TGME49_218450 | p.Gly567Ser  | missense_variant                               | hypothetical protein |
| TGME49_218390 | p.Ser44Arg   | missense_variant                               | hypothetical protein |
| TGME49_218390 | p.Ile123Met  | missense_variant                               | hypothetical protein |
| TGME49_218240 | p.Glu700Asp  | missense_variant                               | hypothetical protein |
| TGME49_218240 | p.Pro223Ala  | missense_variant                               | hypothetical protein |
| TGME49_218240 | p.Phe205Val  | missense_variant                               | hypothetical protein |
| TGME49_218215 | c.1098-5T>C  | splice_region_variant                          | hypothetical protein |
| TGME49_218215 | p.Ser168Asn  | missense_variant                               | hypothetical protein |
| TGME49_218188 | c.2691+3G>C  | splice_region_variant                          | hypothetical protein |
| TGME49_218188 | p.Ala394Val  | missense_variant                               | hypothetical protein |
| TGME49_218188 | p.Arg355Leu  | missense_variant                               | hypothetical protein |
| TGME49_218188 | p.Ala147Glu  | missense_variant                               | hypothetical protein |
| TGME49_218188 | p.Met8Val    | missense_variant                               | hypothetical protein |
| TGME49_218188 | c.-33C>T     | 5_prime_UTR_premature_start_codon_gain_variant | hypothetical protein |
| TGME49_218188 | c.-303C>T    | 5_prime_UTR_premature_start_codon_gain_variant | hypothetical protein |
| TGME49_218130 | p.Pro29Leu   | missense_variant                               | hypothetical protein |
| TGME49_218130 | c.-343C>G    | 5_prime_UTR_premature_start_codon_gain_variant | hypothetical protein |
| TGME49_218070 | p.Gln1392Arg | missense_variant                               | hypothetical protein |
| TGME49_218070 | p.Ala1382Val | missense_variant                               | hypothetical protein |

|               |              |                                                |                      |
|---------------|--------------|------------------------------------------------|----------------------|
| TGME49_218070 | p.Phe1275Val | missense_variant                               | hypothetical protein |
| TGME49_218070 | p.Lys1182Met | missense_variant                               | hypothetical protein |
| TGME49_218070 | p.Arg1137Ser | missense_variant                               | hypothetical protein |
| TGME49_218070 | c.1687-5C>T  | splice_region_variant                          | hypothetical protein |
| TGME49_218070 | p.Thr293Ser  | missense_variant                               | hypothetical protein |
| TGME49_218000 | p.Thr3227Ile | missense_variant                               | hypothetical protein |
| TGME49_218000 | p.Ser3221Leu | missense_variant                               | hypothetical protein |
| TGME49_218000 | p.Ala3142Val | missense_variant                               | hypothetical protein |
| TGME49_218000 | p.Asp3041Asn | missense_variant                               | hypothetical protein |
| TGME49_218000 | p.Glu3028Val | missense_variant                               | hypothetical protein |
| TGME49_218000 | p.Thr2918Ala | missense_variant                               | hypothetical protein |
| TGME49_218000 | p.Val2356Met | missense_variant                               | hypothetical protein |
| TGME49_218000 | p.Phe1834Leu | missense_variant                               | hypothetical protein |
| TGME49_218000 | p.Ala1736Ser | missense_variant                               | hypothetical protein |
| TGME49_218000 | p.Ser1732Trp | missense_variant                               | hypothetical protein |
| TGME49_218000 | p.Arg1691Thr | missense_variant                               | hypothetical protein |
| TGME49_218000 | p.Arg1691Gly | missense_variant                               | hypothetical protein |
| TGME49_218000 | p.Glu1460Ala | missense_variant                               | hypothetical protein |
| TGME49_218000 | p.His1189Pro | missense_variant                               | hypothetical protein |
| TGME49_218000 | p.Lys1032Arg | missense_variant                               | hypothetical protein |
| TGME49_218000 | p.Ala878Pro  | missense_variant                               | hypothetical protein |
| TGME49_218000 | p.Ser787Ala  | missense_variant                               | hypothetical protein |
| TGME49_218000 | p.Gln713Pro  | missense_variant                               | hypothetical protein |
| TGME49_218000 | p.Gln708Pro  | missense_variant                               | hypothetical protein |
| TGME49_218000 | p.Gly476Ser  | missense_variant                               | hypothetical protein |
| TGME49_218000 | p.Gly473Ser  | missense_variant                               | hypothetical protein |
| TGME49_217340 | c.-541C>T    | 5_prime_UTR_premature_start_codon_gain_variant | hypothetical protein |
| TGME49_217340 | c.-454C>G    | 5_prime_UTR_premature_start_codon_gain_variant | hypothetical protein |
| TGME49_217340 | c.-402C>T    | 5_prime_UTR_premature_start_codon_gain_variant | hypothetical protein |
| TGME49_217340 | c.-157G>A    | 5_prime_UTR_premature_start_codon_gain_variant | hypothetical protein |
| TGME49_217340 | c.2109+4A>T  | splice_region_variant                          | hypothetical protein |
| TGME49_217360 | c.-989C>T    | 5_prime_UTR_premature_start_codon_gain_variant | hypothetical protein |
| TGME49_217360 | p.Ala552Thr  | missense_variant                               | hypothetical protein |
| TGME49_217360 | p.Lys562Arg  | missense_variant                               | hypothetical protein |
| TGME49_217360 | p.Arg1921Trp | missense_variant                               | hypothetical protein |
| TGME49_217380 | p.Pro482Ser  | missense_variant                               | hypothetical protein |
| TGME49_217390 | p.Glu631Lys  | missense_variant                               | hypothetical protein |
| TGME49_217390 | p.Thr418Ile  | missense_variant                               | hypothetical protein |
| TGME49_217400 | p.Ala418Val  | missense_variant                               | hypothetical protein |
| TGME49_217410 | p.His110Arg  | missense_variant                               | hypothetical protein |
| TGME49_217470 | p.Ala30Pro   | missense_variant                               | hypothetical protein |
| TGME49_217470 | p.Arg210Cys  | missense_variant                               | hypothetical protein |
| TGME49_217470 | p.Asn386Ser  | missense_variant                               | hypothetical protein |
| TGME49_217470 | p.Ala757Thr  | missense_variant                               | hypothetical protein |
| TGME49_217480 | c.-2096T>C   | 5_prime_UTR_premature_start_codon_gain_variant | hypothetical protein |
| TGME49_217480 | c.-668C>G    | 5_prime_UTR_premature_start_codon_gain_variant | hypothetical protein |
| TGME49_217480 | c.3148+3A>G  | splice_region_variant                          | hypothetical protein |
| TGME49_217480 | p.Val1463Met | missense_variant                               | hypothetical protein |
| TGME49_217490 | p.Glu95Ala   | missense_variant                               | hypothetical protein |
| TGME49_217490 | p.Leu179Met  | missense_variant                               | hypothetical protein |
| TGME49_217490 | c.627-6G>A   | splice_region_variant                          | hypothetical protein |
| TGME49_217520 | c.*907C>T    | splice_region_variant                          | hypothetical protein |
| TGME49_217520 | p.Ser44Ala   | missense_variant                               | hypothetical protein |
| TGME49_217520 | c.-781C>T    | 5_prime_UTR_premature_start_codon_gain_variant | hypothetical protein |
| TGME49_217520 | c.-885A>T    | 5_prime_UTR_premature_start_codon_gain_variant | hypothetical protein |
| TGME49_217530 | p.Pro44Ser   | missense_variant                               | hypothetical protein |
| TGME49_217530 | p.Arg209Gly  | missense_variant                               | hypothetical protein |
| TGME49_217530 | p.Thr248Ile  | missense_variant                               | hypothetical protein |
| TGME49_217610 | p.Ala691Thr  | missense_variant                               | hypothetical protein |
| TGME49_217610 | p.Gln550Leu  | missense_variant                               | hypothetical protein |
| TGME49_217620 | p.Asn241Ser  | missense_variant                               | hypothetical protein |
| TGME49_217620 | p.Leu230Pro  | missense_variant                               | hypothetical protein |
| TGME49_217620 | p.His109Asn  | missense_variant                               | hypothetical protein |
| TGME49_217620 | p.Ile78Val   | missense_variant                               | hypothetical protein |
| TGME49_217620 | c.-453G>C    | 5_prime_UTR_premature_start_codon_gain_variant | hypothetical protein |
| TGME49_217630 | c.-1016G>C   | 5_prime_UTR_premature_start_codon_gain_variant | hypothetical protein |
| TGME49_217630 | p.Arg80Gln   | missense_variant                               | hypothetical protein |
| TGME49_217630 | p.Ala160Thr  | missense_variant                               | hypothetical protein |
| TGME49_217630 | p.Ser464Leu  | missense_variant                               | hypothetical protein |
| TGME49_217630 | p.Asp745Gly  | missense_variant                               | hypothetical protein |
| TGME49_217630 | p.Ser976Gly  | missense_variant                               | hypothetical protein |
| TGME49_217630 | p.His992Tyr  | missense_variant                               | hypothetical protein |
| TGME49_217650 | p.Val483Ile  | missense_variant                               | hypothetical protein |
| TGME49_217665 | c.-194C>T    | 5_prime_UTR_premature_start_codon_gain_variant | hypothetical protein |
| TGME49_217680 | p.Pro2154Leu | missense_variant                               | hypothetical protein |
| TGME49_217680 | p.Gln2149His | missense_variant                               | hypothetical protein |
| TGME49_217680 | p.Leu2130Arg | missense_variant                               | hypothetical protein |
| TGME49_217680 | p.Met2129Val | missense_variant                               | hypothetical protein |
| TGME49_217680 | p.Glu1934Lys | missense_variant                               | hypothetical protein |
| TGME49_217680 | p.Leu1542Val | missense_variant                               | hypothetical protein |
| TGME49_217680 | p.Leu1116Val | missense_variant                               | hypothetical protein |
| TGME49_217680 | p.Val593Ala  | missense_variant                               | hypothetical protein |
| TGME49_217680 | p.Val593Leu  | missense_variant                               | hypothetical protein |
| TGME49_217680 | c.1123+3C>T  | splice_region_variant                          | hypothetical protein |
| TGME49_217680 | p.His117Asp  | missense_variant                               | hypothetical protein |

|               |              |                                                |                      |
|---------------|--------------|------------------------------------------------|----------------------|
| TGME49_217680 | p.Pro93Leu   | missense_variant                               | hypothetical protein |
| TGME49_217692 | p.Ala1316Gly | missense_variant                               | hypothetical protein |
| TGME49_217692 | p.Glu789Gly  | missense_variant                               | hypothetical protein |
| TGME49_217692 | p.Leu213Arg  | missense_variant                               | hypothetical protein |
| TGME49_217688 | p.Thr394Met  | missense_variant                               | hypothetical protein |
| TGME49_217688 | p.Pro355Leu  | missense_variant                               | hypothetical protein |
| TGME49_217688 | p.Leu283Val  | missense_variant                               | hypothetical protein |
| TGME49_217688 | c.-1698G>A   | 5_prime_UTR_premature_start_codon_gain_variant | hypothetical protein |
| TGME49_217720 | c.*442C>A    | splice_region_variant                          | hypothetical protein |
| TGME49_217724 | p.Asn73Lys   | missense_variant                               | hypothetical protein |
| TGME49_217724 | p.Pro74Ser   | missense_variant                               | hypothetical protein |
| TGME49_217726 | p.Thr3Ala    | missense_variant                               | hypothetical protein |
| TGME49_217726 | p.Pro11Leu   | missense_variant                               | hypothetical protein |
| TGME49_217726 | p.Ile31Thr   | missense_variant                               | hypothetical protein |
| TGME49_217728 | p.Pro34Gln   | missense_variant                               | hypothetical protein |
| TGME49_217730 | p.Asp1068Gly | missense_variant                               | hypothetical protein |
| TGME49_217730 | c.3052+7A>C  | splice_region_variant                          | hypothetical protein |
| TGME49_217730 | p.Arg900Leu  | missense_variant                               | hypothetical protein |
| TGME49_217730 | p.Ala892Pro  | missense_variant                               | hypothetical protein |
| TGME49_217730 | p.Phe748Ser  | missense_variant                               | hypothetical protein |
| TGME49_217730 | p.Arg631His  | missense_variant                               | hypothetical protein |
| TGME49_217730 | p.Arg609Gly  | missense_variant                               | hypothetical protein |
| TGME49_217730 | p.Ser600Pro  | missense_variant                               | hypothetical protein |
| TGME49_217730 | p.Arg272Lys  | missense_variant                               | hypothetical protein |
| TGME49_217730 | c.-413C>T    | 5_prime_UTR_premature_start_codon_gain_variant | hypothetical protein |
| TGME49_217750 | p.Gly18Asp   | missense_variant                               | hypothetical protein |
| TGME49_217750 | p.Pro111Gln  | missense_variant                               | hypothetical protein |
| TGME49_217750 | p.Cys136Trp  | missense_variant                               | hypothetical protein |
| TGME49_217750 | p.Ile143Thr  | missense_variant                               | hypothetical protein |
| TGME49_217770 | c.-645G>A    | 5_prime_UTR_premature_start_codon_gain_variant | hypothetical protein |
| TGME49_217770 | c.-397G>T    | 5_prime_UTR_premature_start_codon_gain_variant | hypothetical protein |
| TGME49_217770 | p.Asp59Asn   | missense_variant                               | hypothetical protein |
| TGME49_217770 | p.Asn161Thr  | missense_variant                               | hypothetical protein |
| TGME49_217770 | p.Gly470Arg  | missense_variant                               | hypothetical protein |
| TGME49_217770 | p.Ser535Pro  | missense_variant                               | hypothetical protein |
| TGME49_217770 | p.Arg695Trp  | missense_variant                               | hypothetical protein |
| TGME49_217770 | p.Phe702Leu  | missense_variant                               | hypothetical protein |
| TGME49_217770 | p.Glu819Gln  | missense_variant                               | hypothetical protein |
| TGME49_217770 | p.Glu900Gln  | missense_variant                               | hypothetical protein |
| TGME49_217770 | p.Asp1114Glu | missense_variant                               | hypothetical protein |
| TGME49_217770 | p.Val1359Glu | missense_variant                               | hypothetical protein |
| TGME49_217800 | p.Arg1171His | missense_variant                               | hypothetical protein |
| TGME49_217800 | p.Arg1048Lys | missense_variant                               | hypothetical protein |
| TGME49_217800 | p.Arg864Gln  | missense_variant                               | hypothetical protein |
| TGME49_217800 | p.Ala833Thr  | missense_variant                               | hypothetical protein |
| TGME49_217800 | p.Glu758Asp  | missense_variant                               | hypothetical protein |
| TGME49_217800 | p.Pro477Ala  | missense_variant                               | hypothetical protein |
| TGME49_217800 | p.Leu440Val  | missense_variant                               | hypothetical protein |
| TGME49_217810 | p.Ser156Pro  | missense_variant                               | hypothetical protein |
| TGME49_217830 | p.Asp1872Gly | missense_variant                               | hypothetical protein |
| TGME49_217830 | p.Ser1779Cys | missense_variant                               | hypothetical protein |
| TGME49_217830 | p.Asp1758Asn | missense_variant                               | hypothetical protein |
| TGME49_217830 | c.5015-7G>A  | splice_region_variant                          | hypothetical protein |
| TGME49_217830 | p.Ala1114Gly | missense_variant                               | hypothetical protein |
| TGME49_217830 | p.Thr1079Ala | missense_variant                               | hypothetical protein |
| TGME49_217830 | p.Ala859Thr  | missense_variant                               | hypothetical protein |
| TGME49_217830 | p.Glu192Asp  | missense_variant                               | hypothetical protein |
| TGME49_217860 | c.-333C>T    | 5_prime_UTR_premature_start_codon_gain_variant | hypothetical protein |
| TGME49_217860 | c.-139G>T    | 5_prime_UTR_premature_start_codon_gain_variant | hypothetical protein |
| TGME49_217860 | p.Gly20Ala   | missense_variant                               | hypothetical protein |
| TGME49_217860 | p.Ala36Ser   | missense_variant                               | hypothetical protein |
| TGME49_217860 | p.Ala204Gly  | missense_variant                               | hypothetical protein |
| TGME49_217860 | p.Cys228Arg  | missense_variant                               | hypothetical protein |
| TGME49_217860 | p.Phe330Ser  | missense_variant                               | hypothetical protein |
| TGME49_217860 | p.His461Arg  | missense_variant                               | hypothetical protein |
| TGME49_217860 | p.Thr738Ser  | missense_variant                               | hypothetical protein |
| TGME49_217860 | p.Thr949Ala  | missense_variant                               | hypothetical protein |
| TGME49_217860 | p.Asp1161Asn | missense_variant                               | hypothetical protein |
| TGME49_217860 | p.Ala1171Thr | missense_variant                               | hypothetical protein |
| TGME49_217860 | p.Phe1261Leu | missense_variant                               | hypothetical protein |
| TGME49_217860 | p.Ala1396Pro | missense_variant                               | hypothetical protein |
| TGME49_217860 | p.Met1594Leu | missense_variant                               | hypothetical protein |
| TGME49_217860 | p.Ala1731Glu | missense_variant                               | hypothetical protein |
| TGME49_217860 | p.Ser1789Gly | missense_variant                               | hypothetical protein |
| TGME49_217860 | p.Glu2096Asp | missense_variant                               | hypothetical protein |
| TGME49_217860 | p.Ala2304Val | missense_variant                               | hypothetical protein |
| TGME49_217860 | p.Thr2306Met | missense_variant                               | hypothetical protein |
| TGME49_217860 | p.Pro2362Gln | missense_variant                               | hypothetical protein |
| TGME49_217860 | p.Lys2569Asn | missense_variant                               | hypothetical protein |
| TGME49_217860 | p.Phe2572Leu | missense_variant                               | hypothetical protein |
| TGME49_217860 | p.Gly2618Asp | missense_variant                               | hypothetical protein |
| TGME49_217860 | p.Asp2853His | missense_variant                               | hypothetical protein |
| TGME49_217900 | p.Glu171Asp  | missense_variant                               | hypothetical protein |
| TGME49_217900 | p.Cys66Tyr   | missense_variant                               | hypothetical protein |
| TGME49_217915 | p.Asp26Glu   | missense_variant                               | hypothetical protein |

|               |              |                                                |                      |
|---------------|--------------|------------------------------------------------|----------------------|
| TGME49_217915 | p.Trp96Ser   | missense_variant                               | hypothetical protein |
| TGME49_217915 | p.Arg160Trp  | missense_variant                               | hypothetical protein |
| TGME49_217915 | p.Lys216Thr  | missense_variant                               | hypothetical protein |
| TGME49_217940 | p.Thr265Ala  | missense_variant                               | hypothetical protein |
| TGME49_217940 | p.Lys967Asn  | missense_variant&splice_region_variant         | hypothetical protein |
| TGME49_245428 | p.Leu165Val  | missense_variant                               | hypothetical protein |
| TGME49_245428 | p.Tyr103His  | missense_variant                               | hypothetical protein |
| TGME49_245432 | p.Pro175Ser  | missense_variant                               | hypothetical protein |
| TGME49_245440 | p.Asp59His   | missense_variant                               | hypothetical protein |
| TGME49_245530 | p.Pro608Leu  | missense_variant                               | hypothetical protein |
| TGME49_245530 | p.Pro644Leu  | missense_variant                               | hypothetical protein |
| TGME49_245530 | p.Thr681Ala  | missense_variant                               | hypothetical protein |
| TGME49_245530 | p.Arg1536Lys | missense_variant                               | hypothetical protein |
| TGME49_245530 | p.Thr1712Ser | missense_variant                               | hypothetical protein |
| TGME49_245530 | p.Ile2108Val | missense_variant                               | hypothetical protein |
| TGME49_245560 | c.201-8C>A   | splice_region_variant                          | hypothetical protein |
| TGME49_245560 | p.Thr614Pro  | missense_variant                               | hypothetical protein |
| TGME49_245560 | p.Arg629Gly  | missense_variant                               | hypothetical protein |
| TGME49_245560 | p.Ala895Thr  | missense_variant                               | hypothetical protein |
| TGME49_245560 | p.Thr1506Ile | missense_variant                               | hypothetical protein |
| TGME49_245560 | p.Ser1582Asn | missense_variant                               | hypothetical protein |
| TGME49_245560 | p.Ala1675Glu | missense_variant                               | hypothetical protein |
| TGME49_245560 | p.Gly1726Ser | missense_variant                               | hypothetical protein |
| TGME49_245560 | p.Phe1905Leu | missense_variant                               | hypothetical protein |
| TGME49_245580 | p.Ala15Thr   | missense_variant                               | hypothetical protein |
| TGME49_245580 | p.Val18Ile   | missense_variant                               | hypothetical protein |
| TGME49_245580 | p.Pro95Ser   | missense_variant                               | hypothetical protein |
| TGME49_245580 | p.Val104Leu  | missense_variant                               | hypothetical protein |
| TGME49_245580 | p.Ala131Ser  | missense_variant                               | hypothetical protein |
| TGME49_245580 | p.Pro861Leu  | missense_variant                               | hypothetical protein |
| TGME49_245580 | p.Cys1005Tyr | missense_variant                               | hypothetical protein |
| TGME49_245580 | p.Gln1017Arg | missense_variant                               | hypothetical protein |
| TGME49_245600 | p.Leu69His   | missense_variant                               | hypothetical protein |
| TGME49_245600 | p.Gly49Ala   | missense_variant                               | hypothetical protein |
| TGME49_245610 | c.1492-8A>G  | splice_region_variant                          | hypothetical protein |
| TGME49_245610 | c.1492-4C>T  | splice_region_variant                          | hypothetical protein |
| TGME49_245640 | p.Met123Leu  | missense_variant                               | hypothetical protein |
| TGME49_245640 | p.Gly77Asp   | missense_variant                               | hypothetical protein |
| TGME49_245640 | p.Val18Leu   | missense_variant                               | hypothetical protein |
| TGME49_245640 | p.Ile6Val    | missense_variant                               | hypothetical protein |
| TGME49_245640 | c.-99C>T     | 5_prime_UTR_premature_start_codon_gain_variant | hypothetical protein |
| TGME49_245660 | p.Ser240Cys  | missense_variant                               | hypothetical protein |
| TGME49_245660 | c.-39A>T     | 5_prime_UTR_premature_start_codon_gain_variant | hypothetical protein |
| TGME49_245746 | c.1536+4C>A  | splice_region_variant                          | hypothetical protein |
| TGME49_245746 | c.1536+3A>G  | splice_region_variant                          | hypothetical protein |
| TGME49_245746 | p.Ser85Asn   | missense_variant                               | hypothetical protein |
| TGME49_245746 | p.Pro83Ser   | missense_variant                               | hypothetical protein |
| TGME49_245746 | p.Leu20Val   | missense_variant                               | hypothetical protein |
| TGME49_245748 | c.-2057C>G   | 5_prime_UTR_premature_start_codon_gain_variant | hypothetical protein |
| TGME49_245748 | c.-1328A>C   | 5_prime_UTR_premature_start_codon_gain_variant | hypothetical protein |
| TGME49_245748 | p.Val201Ile  | missense_variant                               | hypothetical protein |
| TGME49_245748 | p.Pro204Thr  | missense_variant                               | hypothetical protein |
| TGME49_245990 | p.Gly232Glu  | missense_variant                               | hypothetical protein |
| TGME49_245990 | p.Ala9Val    | missense_variant                               | hypothetical protein |
| TGME49_245995 | p.Ser78*     | stop_gained                                    | hypothetical protein |
| TGME49_246050 | p.Pro713Ser  | missense_variant                               | hypothetical protein |
| TGME49_246050 | p.Ser553Pro  | missense_variant                               | hypothetical protein |
| TGME49_246050 | p.Ser552Pro  | missense_variant                               | hypothetical protein |
| TGME49_246050 | p.Ser139Phe  | missense_variant                               | hypothetical protein |
| TGME49_246090 | p.Ala884Val  | missense_variant                               | hypothetical protein |
| TGME49_246140 | p.Leu992Gln  | missense_variant                               | hypothetical protein |
| TGME49_246140 | p.Thr513Ile  | missense_variant                               | hypothetical protein |
| TGME49_246140 | p.Gly451Arg  | missense_variant                               | hypothetical protein |
| TGME49_246140 | p.Ala341Val  | missense_variant                               | hypothetical protein |
| TGME49_246140 | p.Arg143Thr  | missense_variant                               | hypothetical protein |
| TGME49_246160 | p.Ala50Ser   | missense_variant                               | hypothetical protein |
| TGME49_246160 | p.Val165Ile  | missense_variant                               | hypothetical protein |
| TGME49_246160 | p.Gly236Arg  | missense_variant                               | hypothetical protein |
| TGME49_246160 | p.Leu256Met  | missense_variant                               | hypothetical protein |
| TGME49_246160 | p.Val905Met  | missense_variant                               | hypothetical protein |
| TGME49_246190 | p.Asp378His  | missense_variant                               | hypothetical protein |
| TGME49_246190 | p.Glu402Ala  | missense_variant                               | hypothetical protein |
| TGME49_246190 | p.Ala417Asp  | missense_variant                               | hypothetical protein |
| TGME49_246190 | p.Leu425His  | missense_variant                               | hypothetical protein |
| TGME49_246190 | p.Val433Met  | missense_variant                               | hypothetical protein |
| TGME49_246190 | p.Ala581Val  | missense_variant                               | hypothetical protein |
| TGME49_246190 | p.Ser646Thr  | missense_variant                               | hypothetical protein |
| TGME49_246190 | p.Val919Gly  | missense_variant                               | hypothetical protein |
| TGME49_246190 | p.Gly1091Glu | missense_variant                               | hypothetical protein |
| TGME49_246190 | p.Ser1187Thr | missense_variant                               | hypothetical protein |
| TGME49_246190 | p.Lys1757Asn | missense_variant                               | hypothetical protein |
| TGME49_246190 | p.Ser1996Arg | missense_variant                               | hypothetical protein |
| TGME49_246190 | p.Ala2010Glu | missense_variant                               | hypothetical protein |
| TGME49_246190 | p.Pro2163Ser | missense_variant                               | hypothetical protein |
| TGME49_246190 | p.Gly2260Ser | missense_variant                               | hypothetical protein |

|               |              |                                                |                      |
|---------------|--------------|------------------------------------------------|----------------------|
| TGME49_246190 | p.Lys2537Arg | missense_variant                               | hypothetical protein |
| TGME49_246190 | p.Val2603Ala | missense_variant                               | hypothetical protein |
| TGME49_246190 | p.Pro2703Ala | missense_variant                               | hypothetical protein |
| TGME49_246190 | p.Glu3135Lys | missense_variant                               | hypothetical protein |
| TGME49_246190 | p.Arg3447Pro | missense_variant                               | hypothetical protein |
| TGME49_246190 | p.Ala3694Val | missense_variant                               | hypothetical protein |
| TGME49_246190 | p.Met3797Ile | missense_variant                               | hypothetical protein |
| TGME49_246220 | p.Gln634Lys  | missense_variant                               | hypothetical protein |
| TGME49_246220 | p.Leu244Phe  | missense_variant                               | hypothetical protein |
| TGME49_246220 | p.Leu118Val  | missense_variant                               | hypothetical protein |
| TGME49_246450 | c.94+7A>C    | splice_region_variant                          | hypothetical protein |
| TGME49_246460 | p.Ser79Phe   | missense_variant                               | hypothetical protein |
| TGME49_246475 | c.1708-7A>G  | splice_region_variant                          | hypothetical protein |
| TGME49_246475 | p.Gly404Arg  | missense_variant                               | hypothetical protein |
| TGME49_246475 | p.Val285Phe  | missense_variant                               | hypothetical protein |
| TGME49_246475 | p.Leu249Phe  | missense_variant                               | hypothetical protein |
| TGME49_246475 | p.Ser135Phe  | missense_variant                               | hypothetical protein |
| TGME49_246475 | p.Cys23Tyr   | missense_variant                               | hypothetical protein |
| TGME49_246490 | p.Ala234Val  | missense_variant                               | hypothetical protein |
| TGME49_246520 | p.Ala604Thr  | missense_variant                               | hypothetical protein |
| TGME49_246520 | p.Pro275Ala  | missense_variant                               | hypothetical protein |
| TGME49_246535 | p.Glu107Ala  | missense_variant                               | hypothetical protein |
| TGME49_246535 | c.-16C>T     | 5_prime_UTR_premature_start_codon_gain_variant | hypothetical protein |
| TGME49_246555 | p.Leu102Pro  | missense_variant                               | hypothetical protein |
| TGME49_246570 | p.Glu11Asp   | missense_variant                               | hypothetical protein |
| TGME49_246570 | c.-321T>G    | 5_prime_UTR_premature_start_codon_gain_variant | hypothetical protein |
| TGME49_246570 | c.-344C>T    | 5_prime_UTR_premature_start_codon_gain_variant | hypothetical protein |
| TGME49_246590 | p.Val195Ile  | missense_variant                               | hypothetical protein |
| TGME49_246590 | p.His292Arg  | missense_variant                               | hypothetical protein |
| TGME49_246610 | p.Val534Ile  | missense_variant                               | hypothetical protein |
| TGME49_246610 | p.Asp371Asn  | missense_variant                               | hypothetical protein |
| TGME49_246610 | p.Gly249Glu  | missense_variant                               | hypothetical protein |
| TGME49_246610 | p.Gly175Glu  | missense_variant                               | hypothetical protein |
| TGME49_246610 | p.Glu71Ala   | missense_variant                               | hypothetical protein |
| TGME49_246610 | p.Arg9Leu    | missense_variant                               | hypothetical protein |
| TGME49_246635 | p.Ala83Val   | missense_variant                               | hypothetical protein |
| TGME49_246635 | p.Gly104Ala  | missense_variant&splice_region_variant         | hypothetical protein |
| TGME49_246670 | c.-668A>G    | 5_prime_UTR_premature_start_codon_gain_variant | hypothetical protein |
| TGME49_246670 | c.232+6A>G   | splice_region_variant                          | hypothetical protein |
| TGME49_246710 | p.Pro292Ala  | missense_variant                               | hypothetical protein |
| TGME49_246720 | c.-852A>T    | 5_prime_UTR_premature_start_codon_gain_variant | hypothetical protein |
| TGME49_246720 | p.Ser218Arg  | missense_variant                               | hypothetical protein |
| TGME49_246740 | c.-738C>T    | 5_prime_UTR_premature_start_codon_gain_variant | hypothetical protein |
| TGME49_246740 | p.Thr177Ala  | missense_variant                               | hypothetical protein |
| TGME49_246750 | p.Thr218Met  | missense_variant                               | hypothetical protein |
| TGME49_246750 | p.Ala101Pro  | missense_variant                               | hypothetical protein |
| TGME49_246750 | c.-95C>T     | 5_prime_UTR_premature_start_codon_gain_variant | hypothetical protein |
| TGME49_246750 | c.-214C>T    | 5_prime_UTR_premature_start_codon_gain_variant | hypothetical protein |
| TGME49_246750 | c.-752C>T    | 5_prime_UTR_premature_start_codon_gain_variant | hypothetical protein |
| TGME49_246760 | p.Glu981Gly  | missense_variant                               | hypothetical protein |
| TGME49_246760 | p.Cys1001Arg | missense_variant                               | hypothetical protein |
| TGME49_246760 | p.His1107Asp | missense_variant                               | hypothetical protein |
| TGME49_246760 | p.Arg1259Thr | missense_variant                               | hypothetical protein |
| TGME49_246760 | p.Ser1383Asn | missense_variant                               | hypothetical protein |
| TGME49_246760 | p.Arg1645Gly | missense_variant                               | hypothetical protein |
| TGME49_246760 | p.Asn1728Asp | missense_variant                               | hypothetical protein |
| TGME49_246760 | p.Asp1913Gly | missense_variant                               | hypothetical protein |
| TGME49_246760 | p.Phe2474Ser | missense_variant                               | hypothetical protein |
| TGME49_246770 | c.-786C>T    | 5_prime_UTR_premature_start_codon_gain_variant | hypothetical protein |
| TGME49_246780 | p.Asp540Asn  | missense_variant                               | hypothetical protein |
| TGME49_246780 | p.Glu505Gln  | missense_variant                               | hypothetical protein |
| TGME49_246780 | p.Ala383Val  | missense_variant                               | hypothetical protein |
| TGME49_246780 | p.Arg162Cys  | missense_variant                               | hypothetical protein |
| TGME49_246780 | c.-459C>T    | 5_prime_UTR_premature_start_codon_gain_variant | hypothetical protein |
| TGME49_246780 | c.-860C>A    | 5_prime_UTR_premature_start_codon_gain_variant | hypothetical protein |
| TGME49_246950 | p.Ser341Thr  | missense_variant                               | hypothetical protein |
| TGME49_246960 | p.Gln15His   | missense_variant                               | hypothetical protein |
| TGME49_246960 | p.Pro188Ser  | missense_variant                               | hypothetical protein |
| TGME49_246960 | p.Cys210Gly  | missense_variant                               | hypothetical protein |
| TGME49_246978 | p.Val1152Leu | missense_variant                               | hypothetical protein |
| TGME49_246978 | p.Leu362Val  | missense_variant                               | hypothetical protein |
| TGME49_246978 | c.-702C>T    | 5_prime_UTR_premature_start_codon_gain_variant | hypothetical protein |
| TGME49_246982 | p.Arg978Trp  | missense_variant                               | hypothetical protein |
| TGME49_246982 | p.Pro779His  | missense_variant                               | hypothetical protein |
| TGME49_246982 | c.-228A>G    | 5_prime_UTR_premature_start_codon_gain_variant | hypothetical protein |
| TGME49_246982 | c.-381T>C    | 5_prime_UTR_premature_start_codon_gain_variant | hypothetical protein |
| TGME49_246990 | p.Thr102Ser  | missense_variant                               | hypothetical protein |
| TGME49_246995 | p.Asp1295Glu | missense_variant                               | hypothetical protein |
| TGME49_246995 | p.His1064Pro | missense_variant                               | hypothetical protein |
| TGME49_246995 | p.Gln294His  | missense_variant                               | hypothetical protein |
| TGME49_247010 | p.Ala197Asp  | missense_variant                               | hypothetical protein |
| TGME49_247015 | p.Arg223Gly  | missense_variant                               | hypothetical protein |
| TGME49_247015 | c.-570C>A    | 5_prime_UTR_premature_start_codon_gain_variant | hypothetical protein |
| TGME49_247015 | c.-720T>G    | 5_prime_UTR_premature_start_codon_gain_variant | hypothetical protein |
| TGME49_247025 | p.Gly176Glu  | missense_variant                               | hypothetical protein |



|               |              |                                                |                      |
|---------------|--------------|------------------------------------------------|----------------------|
| TGME49_247040 | p.Cys602Gly  | missense_variant                               | hypothetical protein |
| TGME49_247040 | p.Gly497Ala  | missense_variant                               | hypothetical protein |
| TGME49_247040 | p.Arg264Gln  | missense_variant                               | hypothetical protein |
| TGME49_247040 | p.Asp245Gly  | missense_variant                               | hypothetical protein |
| TGME49_247040 | p.Ser176Gly  | missense_variant                               | hypothetical protein |
| TGME49_247040 | c.-143C>T    | 5_prime_UTR_premature_start_codon_gain_variant | hypothetical protein |
| TGME49_247040 | c.-184C>T    | 5_prime_UTR_premature_start_codon_gain_variant | hypothetical protein |
| TGME49_247040 | c.-543G>T    | 5_prime_UTR_premature_start_codon_gain_variant | hypothetical protein |
| TGME49_247050 | p.Thr143Ile  | missense_variant                               | hypothetical protein |
| TGME49_247050 | p.Lys417Asn  | missense_variant                               | hypothetical protein |
| TGME49_247050 | p.Ser457Phe  | missense_variant                               | hypothetical protein |
| TGME49_247050 | p.Gly961Glu  | missense_variant                               | hypothetical protein |
| TGME49_247050 | p.Glu1712Asp | missense_variant                               | hypothetical protein |
| TGME49_247050 | p.Ala1857Thr | missense_variant                               | hypothetical protein |
| TGME49_247050 | p.Ala1912Thr | missense_variant                               | hypothetical protein |
| TGME49_247050 | p.Gly2526Arg | missense_variant                               | hypothetical protein |
| TGME49_247260 | p.Val154Gly  | missense_variant                               | hypothetical protein |
| TGME49_247260 | p.Arg3Leu    | missense_variant                               | hypothetical protein |
| TGME49_247260 | c.-615A>G    | 5_prime_UTR_premature_start_codon_gain_variant | hypothetical protein |
| TGME49_247270 | p.Ala3Thr    | missense_variant                               | hypothetical protein |
| TGME49_247270 | p.Arg7His    | missense_variant                               | hypothetical protein |
| TGME49_247270 | p.Gly243Arg  | missense_variant                               | hypothetical protein |
| TGME49_247270 | c.750-6G>A   | splice_region_variant                          | hypothetical protein |
| TGME49_247270 | p.Gly469Val  | missense_variant                               | hypothetical protein |
| TGME49_247270 | p.Lys568Asn  | missense_variant                               | hypothetical protein |
| TGME49_247270 | p.Ala572Val  | missense_variant                               | hypothetical protein |
| TGME49_247270 | p.Ser769Ala  | missense_variant                               | hypothetical protein |
| TGME49_247270 | p.Arg914Lys  | missense_variant                               | hypothetical protein |
| TGME49_247270 | p.Asn1031His | missense_variant                               | hypothetical protein |
| TGME49_247270 | p.Glu1120Lys | missense_variant                               | hypothetical protein |
| TGME49_247270 | p.Gly1240Ala | missense_variant                               | hypothetical protein |
| TGME49_247280 | p.Arg2383Thr | missense_variant                               | hypothetical protein |
| TGME49_247280 | p.Asp2337Gly | missense_variant                               | hypothetical protein |
| TGME49_247280 | p.Asp2337Asn | missense_variant                               | hypothetical protein |
| TGME49_247280 | p.Leu2275Ser | missense_variant                               | hypothetical protein |
| TGME49_247280 | p.Gln2256Pro | missense_variant                               | hypothetical protein |
| TGME49_247280 | p.Phe2251Leu | missense_variant                               | hypothetical protein |
| TGME49_247280 | p.Leu2205Val | missense_variant                               | hypothetical protein |
| TGME49_247280 | p.Ala2069Val | missense_variant                               | hypothetical protein |
| TGME49_247280 | p.Ala2069Thr | missense_variant                               | hypothetical protein |
| TGME49_247280 | p.Arg1834Gly | missense_variant                               | hypothetical protein |
| TGME49_247280 | p.Asp1801Ala | missense_variant                               | hypothetical protein |
| TGME49_247280 | p.Pro1769Leu | missense_variant                               | hypothetical protein |
| TGME49_247280 | p.Val1764Ala | missense_variant                               | hypothetical protein |
| TGME49_247280 | p.Leu1744Ser | missense_variant                               | hypothetical protein |
| TGME49_247280 | p.His1727Leu | missense_variant                               | hypothetical protein |
| TGME49_247280 | p.Glu1663Gln | missense_variant                               | hypothetical protein |
| TGME49_247280 | p.His1618Gln | missense_variant                               | hypothetical protein |
| TGME49_247280 | p.His1618Arg | missense_variant                               | hypothetical protein |
| TGME49_247280 | p.Glu951Gln  | missense_variant                               | hypothetical protein |
| TGME49_247280 | p.Ala901Val  | missense_variant                               | hypothetical protein |
| TGME49_247280 | p.Ala517Glu  | missense_variant                               | hypothetical protein |
| TGME49_247280 | p.Val462Leu  | missense_variant                               | hypothetical protein |
| TGME49_247280 | p.Glu355Gly  | missense_variant                               | hypothetical protein |
| TGME49_247280 | p.Glu340Asp  | missense_variant                               | hypothetical protein |
| TGME49_247280 | p.Ala209Asp  | missense_variant                               | hypothetical protein |
| TGME49_247280 | p.Glu35Asp   | missense_variant                               | hypothetical protein |
| TGME49_247280 | c.-480C>T    | 5_prime_UTR_premature_start_codon_gain_variant | hypothetical protein |
| TGME49_247290 | p.Lys9Thr    | missense_variant                               | hypothetical protein |
| TGME49_247290 | p.Ser54Trp   | missense_variant                               | hypothetical protein |
| TGME49_247290 | p.Pro283Leu  | missense_variant                               | hypothetical protein |
| TGME49_247290 | p.Pro293Ala  | missense_variant                               | hypothetical protein |
| TGME49_247290 | p.Thr302Ala  | missense_variant                               | hypothetical protein |
| TGME49_247290 | p.Arg537Cys  | missense_variant                               | hypothetical protein |
| TGME49_247290 | p.Arg634His  | missense_variant                               | hypothetical protein |
| TGME49_247290 | p.Arg640Ser  | missense_variant                               | hypothetical protein |
| TGME49_247290 | p.Glu851Ala  | missense_variant                               | hypothetical protein |
| TGME49_247290 | p.Arg927Lys  | missense_variant                               | hypothetical protein |
| TGME49_247290 | p.Tyr1083Cys | missense_variant                               | hypothetical protein |
| TGME49_247290 | p.Leu1320His | missense_variant                               | hypothetical protein |
| TGME49_247290 | p.Pro1379Leu | missense_variant                               | hypothetical protein |
| TGME49_247290 | p.Val1602Gly | missense_variant                               | hypothetical protein |
| TGME49_247290 | p.Val1694Leu | missense_variant                               | hypothetical protein |
| TGME49_247290 | p.Ala1723Thr | missense_variant                               | hypothetical protein |
| TGME49_247290 | p.Val1743Ala | missense_variant                               | hypothetical protein |
| TGME49_247300 | p.Val703Ile  | missense_variant                               | hypothetical protein |
| TGME49_247300 | p.Ala474Glu  | missense_variant                               | hypothetical protein |
| TGME49_247300 | p.Arg48Cys   | missense_variant                               | hypothetical protein |
| TGME49_247330 | p.Ala1410Val | missense_variant                               | hypothetical protein |
| TGME49_247330 | p.Pro1109Arg | missense_variant                               | hypothetical protein |
| TGME49_247330 | p.Gln1096Pro | missense_variant                               | hypothetical protein |
| TGME49_247330 | c.3113+8C>A  | splice_region_variant                          | hypothetical protein |
| TGME49_247330 | c.2951-4G>A  | splice_region_variant                          | hypothetical protein |
| TGME49_247330 | p.Asn818Thr  | missense_variant                               | hypothetical protein |
| TGME49_247330 | p.Leu560Trp  | missense_variant                               | hypothetical protein |

|               |              |                                                |                      |
|---------------|--------------|------------------------------------------------|----------------------|
| TGME49_247340 | c.-35C>T     | 5_prime_UTR_premature_start_codon_gain_variant | hypothetical protein |
| TGME49_247370 | c.175+7C>T   | splice_region_variant                          | hypothetical protein |
| TGME49_247370 | c.1640-5T>C  | splice_region_variant                          | hypothetical protein |
| TGME49_247380 | p.Pro338His  | missense_variant                               | hypothetical protein |
| TGME49_247380 | p.Thr299Pro  | missense_variant                               | hypothetical protein |
| TGME49_247380 | p.Ser139Thr  | missense_variant                               | hypothetical protein |
| TGME49_247380 | p.Ser106Ala  | missense_variant                               | hypothetical protein |
| TGME49_247380 | p.Arg61Leu   | missense_variant                               | hypothetical protein |
| TGME49_247380 | p.Gly36Glu   | missense_variant                               | hypothetical protein |
| TGME49_247400 | c.-565C>G    | 5_prime_UTR_premature_start_codon_gain_variant | hypothetical protein |
| TGME49_247400 | p.Ile25Thr   | missense_variant                               | hypothetical protein |
| TGME49_247400 | p.Ala98Ser   | missense_variant                               | hypothetical protein |
| TGME49_247400 | p.Asn159Ser  | missense_variant                               | hypothetical protein |
| TGME49_247400 | p.Gly224Ser  | missense_variant                               | hypothetical protein |
| TGME49_247400 | p.Asp275Asn  | missense_variant                               | hypothetical protein |
| TGME49_247410 | c.-441A>G    | 5_prime_UTR_premature_start_codon_gain_variant | hypothetical protein |
| TGME49_247420 | c.-830A>G    | 5_prime_UTR_premature_start_codon_gain_variant | hypothetical protein |
| TGME49_247420 | p.Thr68Ala   | missense_variant                               | hypothetical protein |
| TGME49_247440 | p.Pro164Leu  | missense_variant                               | hypothetical protein |
| TGME49_247440 | p.Gly74Asp   | missense_variant                               | hypothetical protein |
| TGME49_247440 | p.Val131Leu  | missense_variant                               | hypothetical protein |
| TGME49_247450 | p.Ala648Pro  | missense_variant                               | hypothetical protein |
| TGME49_247450 | p.Glu1425Asp | missense_variant                               | hypothetical protein |
| TGME49_247520 | p.Pro224Ser  | missense_variant                               | hypothetical protein |
| TGME49_247520 | p.Pro223Leu  | missense_variant                               | hypothetical protein |
| TGME49_247520 | p.Leu128Val  | missense_variant                               | hypothetical protein |
| TGME49_247570 | p.Pro240Leu  | missense_variant                               | hypothetical protein |
| TGME49_247600 | p.Ser274Trp  | missense_variant                               | hypothetical protein |
| TGME49_247640 | p.Met302Ile  | missense_variant                               | hypothetical protein |
| TGME49_247640 | p.Leu184Pro  | missense_variant                               | hypothetical protein |
| TGME49_247640 | c.-743C>T    | 5_prime_UTR_premature_start_codon_gain_variant | hypothetical protein |
| TGME49_247640 | c.-1174A>G   | 5_prime_UTR_premature_start_codon_gain_variant | hypothetical protein |
| TGME49_247652 | p.Ala333Thr  | missense_variant                               | hypothetical protein |
| TGME49_247652 | p.Ala369Thr  | missense_variant                               | hypothetical protein |
| TGME49_247680 | c.*353T>C    | splice_region_variant                          | hypothetical protein |
| TGME49_247680 | p.Val1671Leu | missense_variant                               | hypothetical protein |
| TGME49_247680 | c.4512+4A>C  | splice_region_variant                          | hypothetical protein |
| TGME49_247680 | p.Leu1235Ile | missense_variant                               | hypothetical protein |
| TGME49_247680 | p.Tyr584Ser  | missense_variant                               | hypothetical protein |
| TGME49_247680 | p.Pro307Ser  | missense_variant                               | hypothetical protein |
| TGME49_247680 | p.His269Arg  | missense_variant                               | hypothetical protein |
| TGME49_247680 | p.His81Asn   | missense_variant                               | hypothetical protein |
| TGME49_247720 | p.Ser24Pro   | missense_variant                               | hypothetical protein |
| TGME49_247720 | p.Gln3His    | missense_variant                               | hypothetical protein |
| TGME49_247740 | c.-484T>C    | 5_prime_UTR_premature_start_codon_gain_variant | hypothetical protein |
| TGME49_247740 | c.-282T>G    | 5_prime_UTR_premature_start_codon_gain_variant | hypothetical protein |
| TGME49_247740 | p.Phe46Ile   | missense_variant                               | hypothetical protein |
| TGME49_247740 | p.Arg140His  | missense_variant                               | hypothetical protein |
| TGME49_247740 | p.Pro359Ser  | missense_variant                               | hypothetical protein |
| TGME49_247740 | c.1598+4C>A  | splice_region_variant                          | hypothetical protein |
| TGME49_247740 | p.Gln674Glu  | missense_variant                               | hypothetical protein |
| TGME49_247740 | p.Thr816Ala  | missense_variant                               | hypothetical protein |
| TGME49_247750 | p.Gln169Arg  | missense_variant                               | hypothetical protein |
| TGME49_247850 | p.Ser18Phe   | missense_variant                               | hypothetical protein |
| TGME49_247940 | p.Pro101Leu  | missense_variant                               | hypothetical protein |
| TGME49_247940 | p.Leu47Met   | missense_variant                               | hypothetical protein |
| TGME49_247940 | p.Val16Ile   | missense_variant                               | hypothetical protein |
| TGME49_247940 | p.Gln10Arg   | missense_variant                               | hypothetical protein |
| TGME49_247940 | c.-33C>T     | 5_prime_UTR_premature_start_codon_gain_variant | hypothetical protein |
| TGME49_247940 | c.-44C>G     | 5_prime_UTR_premature_start_codon_gain_variant | hypothetical protein |
| TGME49_247960 | p.Asp294Gly  | missense_variant                               | hypothetical protein |
| TGME49_247960 | p.Asp281Glu  | missense_variant                               | hypothetical protein |
| TGME49_247960 | p.Glu271Gln  | missense_variant                               | hypothetical protein |
| TGME49_247970 | p.His720Arg  | missense_variant                               | hypothetical protein |
| TGME49_247970 | p.Glu801Lys  | missense_variant                               | hypothetical protein |
| TGME49_247970 | p.Val1022Ala | missense_variant                               | hypothetical protein |
| TGME49_247970 | p.Thr1087Ala | missense_variant                               | hypothetical protein |
| TGME49_247970 | p.Thr1189Ala | missense_variant                               | hypothetical protein |
| TGME49_247970 | p.Gln1205*   | stop_gained                                    | hypothetical protein |
| TGME49_248110 | c.-807A>G    | 5_prime_UTR_premature_start_codon_gain_variant | hypothetical protein |
| TGME49_248110 | c.-2657A>T   | 5_prime_UTR_premature_start_codon_gain_variant | hypothetical protein |
| TGME49_248120 | p.Thr872Pro  | missense_variant                               | hypothetical protein |
| TGME49_248120 | p.Pro841Gln  | missense_variant                               | hypothetical protein |
| TGME49_248120 | p.Ala416Pro  | missense_variant                               | hypothetical protein |
| TGME49_248120 | p.Ala220Gly  | missense_variant                               | hypothetical protein |
| TGME49_248120 | c.-636C>T    | 5_prime_UTR_premature_start_codon_gain_variant | hypothetical protein |
| TGME49_248130 | c.-383A>G    | 5_prime_UTR_premature_start_codon_gain_variant | hypothetical protein |
| TGME49_248130 | p.Pro517Leu  | missense_variant                               | hypothetical protein |
| TGME49_248130 | p.Arg828Lys  | missense_variant                               | hypothetical protein |
| TGME49_248130 | p.Lys831Arg  | missense_variant                               | hypothetical protein |
| TGME49_248140 | p.Asp263Gly  | missense_variant                               | hypothetical protein |
| TGME49_248140 | p.Thr178Ala  | missense_variant                               | hypothetical protein |
| TGME49_248140 | p.Val169Met  | missense_variant                               | hypothetical protein |
| TGME49_248140 | p.Pro99Ala   | missense_variant                               | hypothetical protein |
| TGME49_248150 | p.Arg1961Lys | missense_variant                               | hypothetical protein |

|               |               |                                                |                      |
|---------------|---------------|------------------------------------------------|----------------------|
| TGME49_248150 | p.Gln1903His  | missense_variant                               | hypothetical protein |
| TGME49_248150 | c.5307+4A>C   | splice_region_variant                          | hypothetical protein |
| TGME49_248150 | p.Leu1603Val  | missense_variant                               | hypothetical protein |
| TGME49_248150 | p.Thr1536Ala  | missense_variant                               | hypothetical protein |
| TGME49_248150 | p.Ala1052Thr  | missense_variant                               | hypothetical protein |
| TGME49_248150 | p.Glu466Asp   | missense_variant                               | hypothetical protein |
| TGME49_248150 | p.Met426Thr   | missense_variant                               | hypothetical protein |
| TGME49_248160 | p.Ser195Tyr   | missense_variant                               | hypothetical protein |
| TGME49_248160 | p.Ala346Pro   | missense_variant                               | hypothetical protein |
| TGME49_248160 | c.1063-4T>G   | splice_region_variant                          | hypothetical protein |
| TGME49_248160 | p.Thr362Ala   | missense_variant                               | hypothetical protein |
| TGME49_248160 | c.2400+7C>T   | splice_region_variant                          | hypothetical protein |
| TGME49_248170 | p.Ala810Asp   | missense_variant                               | hypothetical protein |
| TGME49_248170 | p.Lys594Glu   | missense_variant                               | hypothetical protein |
| TGME49_248170 | p.Ala359Pro   | missense_variant                               | hypothetical protein |
| TGME49_248170 | p.Lys229Glu   | missense_variant                               | hypothetical protein |
| TGME49_248170 | p.Thr226Pro   | missense_variant                               | hypothetical protein |
| TGME49_248170 | c.-837C>G     | 5_prime_UTR_premature_start_codon_gain_variant | hypothetical protein |
| TGME49_248170 | c.-2019A>G    | 5_prime_UTR_premature_start_codon_gain_variant | hypothetical protein |
| TGME49_248190 | p.Ala87Val    | missense_variant                               | hypothetical protein |
| TGME49_248190 | p.Glu272Asp   | missense_variant                               | hypothetical protein |
| TGME49_248190 | p.Arg298Leu   | missense_variant                               | hypothetical protein |
| TGME49_248190 | p.Arg302Leu   | missense_variant                               | hypothetical protein |
| TGME49_248190 | p.Ala519Thr   | missense_variant                               | hypothetical protein |
| TGME49_248190 | p.Glu587Asp   | missense_variant                               | hypothetical protein |
| TGME49_248190 | p.Gln597Pro   | missense_variant                               | hypothetical protein |
| TGME49_248190 | p.Asp673Gly   | missense_variant                               | hypothetical protein |
| TGME49_248190 | c.2858+1G>A   | splice_donor_variant                           | hypothetical protein |
| TGME49_248210 | p.Val53Phe    | missense_variant                               | hypothetical protein |
| TGME49_248280 | p.Ser10Tyr    | missense_variant                               | hypothetical protein |
| TGME49_248280 | p.Gly19Arg    | missense_variant                               | hypothetical protein |
| TGME49_248280 | p.Gln98His    | missense_variant                               | hypothetical protein |
| TGME49_248300 | p.Ala237Thr   | missense_variant                               | hypothetical protein |
| TGME49_248300 | p.Pro213Arg   | missense_variant                               | hypothetical protein |
| TGME49_248300 | p.Leu140Pro   | missense_variant                               | hypothetical protein |
| TGME49_248350 | p.Lys132Gln   | missense_variant                               | hypothetical protein |
| TGME49_248350 | p.Ala148Val   | missense_variant                               | hypothetical protein |
| TGME49_248350 | p.Thr182Pro   | missense_variant                               | hypothetical protein |
| TGME49_248360 | c.*1772C>G    | splice_region_variant                          | hypothetical protein |
| TGME49_248360 | c.358-4G>A    | splice_region_variant                          | hypothetical protein |
| TGME49_248360 | p.His101Pro   | missense_variant                               | hypothetical protein |
| TGME49_248420 | c.-929T>G     | 5_prime_UTR_premature_start_codon_gain_variant | hypothetical protein |
| TGME49_248425 | p.Arg36Gln    | missense_variant                               | hypothetical protein |
| TGME49_248425 | p.Ala52Gly    | missense_variant&splice_region_variant         | hypothetical protein |
| TGME49_248425 | p.Arg73His    | missense_variant                               | hypothetical protein |
| TGME49_248440 | p.Gln452His   | missense_variant                               | hypothetical protein |
| TGME49_248440 | p.Ala456Thr   | missense_variant                               | hypothetical protein |
| TGME49_248440 | p.Glu764Lys   | missense_variant                               | hypothetical protein |
| TGME49_248490 | c.-355T>C     | 5_prime_UTR_premature_start_codon_gain_variant | hypothetical protein |
| TGME49_248490 | c.-712C>T     | 5_prime_UTR_premature_start_codon_gain_variant | hypothetical protein |
| TGME49_248500 | c.-543C>G     | 5_prime_UTR_premature_start_codon_gain_variant | hypothetical protein |
| TGME49_248500 | c.-215T>G     | 5_prime_UTR_premature_start_codon_gain_variant | hypothetical protein |
| TGME49_248510 | p.Ser11758Leu | missense_variant                               | hypothetical protein |
| TGME49_248510 | p.Glu11596Lys | missense_variant                               | hypothetical protein |
| TGME49_248510 | p.Thr11325Lys | missense_variant                               | hypothetical protein |
| TGME49_248510 | p.Leu10927Phe | missense_variant                               | hypothetical protein |
| TGME49_248510 | p.Asp10755Asn | missense_variant                               | hypothetical protein |
| TGME49_248510 | p.Arg10609Cys | missense_variant                               | hypothetical protein |
| TGME49_248510 | p.Gly10435Val | missense_variant                               | hypothetical protein |
| TGME49_248510 | p.Arg9646Cys  | missense_variant                               | hypothetical protein |
| TGME49_248510 | p.Glu9571Asp  | missense_variant                               | hypothetical protein |
| TGME49_248510 | p.Phe9521Leu  | missense_variant                               | hypothetical protein |
| TGME49_248510 | p.Gln9316Arg  | missense_variant                               | hypothetical protein |
| TGME49_248510 | p.Asn9296Ser  | missense_variant                               | hypothetical protein |
| TGME49_248510 | p.Gln9245His  | missense_variant                               | hypothetical protein |
| TGME49_248510 | p.Val9105Leu  | missense_variant                               | hypothetical protein |
| TGME49_248510 | p.Leu8973Val  | missense_variant                               | hypothetical protein |
| TGME49_248510 | p.Gly8823Cys  | missense_variant                               | hypothetical protein |
| TGME49_248510 | p.Lys8311Glu  | missense_variant                               | hypothetical protein |
| TGME49_248510 | p.Leu8144Phe  | missense_variant                               | hypothetical protein |
| TGME49_248510 | p.Ser7704Asn  | missense_variant                               | hypothetical protein |
| TGME49_248510 | p.Pro7499Ser  | missense_variant                               | hypothetical protein |
| TGME49_248510 | p.Arg7464Pro  | missense_variant                               | hypothetical protein |
| TGME49_248510 | p.Asp7384Asn  | missense_variant                               | hypothetical protein |
| TGME49_248510 | p.Tyr7272His  | missense_variant                               | hypothetical protein |
| TGME49_248510 | c.21504+6T>C  | splice_region_variant                          | hypothetical protein |
| TGME49_248510 | p.Ser7004Arg  | missense_variant                               | hypothetical protein |
| TGME49_248510 | p.Ile6321Leu  | missense_variant                               | hypothetical protein |
| TGME49_248510 | p.His6007Tyr  | missense_variant                               | hypothetical protein |
| TGME49_248510 | p.Asp5997Glu  | missense_variant                               | hypothetical protein |
| TGME49_248510 | p.Leu5925Val  | missense_variant                               | hypothetical protein |
| TGME49_248510 | p.Pro5850Leu  | missense_variant                               | hypothetical protein |
| TGME49_248510 | p.Lys5837Gln  | missense_variant                               | hypothetical protein |
| TGME49_248510 | p.Phe5788Leu  | missense_variant                               | hypothetical protein |
| TGME49_248510 | p.Ser5752Asn  | missense_variant                               | hypothetical protein |

|               |               |                                        |                      |
|---------------|---------------|----------------------------------------|----------------------|
| TGME49_248510 | p.Arg5637Gly  | missense_variant                       | hypothetical protein |
| TGME49_248510 | p.Val5228Ala  | missense_variant                       | hypothetical protein |
| TGME49_248510 | p.Glu4814Asp  | missense_variant                       | hypothetical protein |
| TGME49_248510 | p.Thr4475Arg  | missense_variant                       | hypothetical protein |
| TGME49_248510 | p.Thr4475Ser  | missense_variant                       | hypothetical protein |
| TGME49_248510 | p.Thr4412Ser  | missense_variant&splice_region_variant | hypothetical protein |
| TGME49_248510 | p.Ser4384Arg  | missense_variant                       | hypothetical protein |
| TGME49_248510 | p.Asn4275Ser  | missense_variant                       | hypothetical protein |
| TGME49_248510 | p.Thr4040Arg  | missense_variant                       | hypothetical protein |
| TGME49_248510 | p.Glu3918Lys  | missense_variant                       | hypothetical protein |
| TGME49_248510 | p.Ser3705Pro  | missense_variant                       | hypothetical protein |
| TGME49_248510 | p.Ile3645Leu  | missense_variant                       | hypothetical protein |
| TGME49_248510 | p.Ser3630Thr  | missense_variant                       | hypothetical protein |
| TGME49_248510 | p.Arg3527Ser  | missense_variant                       | hypothetical protein |
| TGME49_248510 | p.Glu3515Asp  | missense_variant                       | hypothetical protein |
| TGME49_248510 | p.Asn3485Lys  | missense_variant                       | hypothetical protein |
| TGME49_248510 | p.Gln33484Pro | missense_variant                       | hypothetical protein |
| TGME49_248510 | p.Gln3312His  | missense_variant                       | hypothetical protein |
| TGME49_248510 | p.Ala3280Gly  | missense_variant                       | hypothetical protein |
| TGME49_248510 | p.Arg3266Gly  | missense_variant                       | hypothetical protein |
| TGME49_248510 | p.Ile3173Leu  | missense_variant                       | hypothetical protein |
| TGME49_248510 | p.Cys3086Phe  | missense_variant                       | hypothetical protein |
| TGME49_248510 | p.Val2889Leu  | missense_variant                       | hypothetical protein |
| TGME49_248510 | p.Arg2839Lys  | missense_variant                       | hypothetical protein |
| TGME49_248510 | p.His2718Asp  | missense_variant                       | hypothetical protein |
| TGME49_248510 | p.Lys2634Thr  | missense_variant                       | hypothetical protein |
| TGME49_248510 | p.Asp2367Gly  | missense_variant                       | hypothetical protein |
| TGME49_248510 | p.Asp2333Gly  | missense_variant                       | hypothetical protein |
| TGME49_248510 | p.Gln2167His  | missense_variant                       | hypothetical protein |
| TGME49_248510 | p.Asp1993Gly  | missense_variant                       | hypothetical protein |
| TGME49_248510 | p.Ser1800Ala  | missense_variant                       | hypothetical protein |
| TGME49_248510 | p.Cys1747Trp  | missense_variant                       | hypothetical protein |
| TGME49_248510 | p.Thr1608Ile  | missense_variant                       | hypothetical protein |
| TGME49_248510 | p.Phe1472Ser  | missense_variant                       | hypothetical protein |
| TGME49_248510 | p.Thr1428Ala  | missense_variant                       | hypothetical protein |
| TGME49_248510 | p.Ser1213Phe  | missense_variant                       | hypothetical protein |
| TGME49_248510 | p.Gly1163Ser  | missense_variant                       | hypothetical protein |
| TGME49_248510 | p.Lys945Arg   | missense_variant                       | hypothetical protein |
| TGME49_248510 | p.Phe778Cys   | missense_variant                       | hypothetical protein |
| TGME49_248510 | p.Lys722Asn   | missense_variant                       | hypothetical protein |
| TGME49_248510 | p.Cys720Ser   | missense_variant                       | hypothetical protein |
| TGME49_248510 | p.Glu525Asp   | missense_variant                       | hypothetical protein |
| TGME49_248520 | p.Leu231Val   | missense_variant                       | hypothetical protein |
| TGME49_248520 | p.Gly207Arg   | missense_variant                       | hypothetical protein |
| TGME49_248520 | p.Gln200His   | missense_variant                       | hypothetical protein |
| TGME49_248520 | p.Pro68Ala    | missense_variant                       | hypothetical protein |
| TGME49_248520 | c.150+6G>A    | splice_region_variant                  | hypothetical protein |
| TGME49_248540 | p.Asn3619His  | missense_variant                       | hypothetical protein |
| TGME49_248540 | p.Ser3540Phe  | missense_variant                       | hypothetical protein |
| TGME49_248540 | p.Ser3316Arg  | missense_variant                       | hypothetical protein |
| TGME49_248540 | p.Val3286Gly  | missense_variant                       | hypothetical protein |
| TGME49_248540 | p.Gly3226Arg  | missense_variant                       | hypothetical protein |
| TGME49_248540 | p.Ser2896Phe  | missense_variant                       | hypothetical protein |
| TGME49_248540 | p.Asn2807Thr  | missense_variant                       | hypothetical protein |
| TGME49_248540 | p.Lys2788Glu  | missense_variant                       | hypothetical protein |
| TGME49_248540 | c.8069-5A>G   | splice_region_variant                  | hypothetical protein |
| TGME49_248540 | p.Glu2684Asp  | missense_variant                       | hypothetical protein |
| TGME49_248540 | p.Arg2319Cys  | missense_variant                       | hypothetical protein |
| TGME49_248540 | p.Trp2088Arg  | missense_variant                       | hypothetical protein |
| TGME49_248540 | p.Ser2064Arg  | missense_variant                       | hypothetical protein |
| TGME49_248540 | p.Asp2008Gly  | missense_variant                       | hypothetical protein |
| TGME49_248540 | p.Ser1998Gly  | missense_variant                       | hypothetical protein |
| TGME49_248540 | p.Asn1978Ser  | missense_variant                       | hypothetical protein |
| TGME49_248540 | p.Pro1818Leu  | missense_variant                       | hypothetical protein |
| TGME49_248540 | p.Ala1650Ser  | missense_variant                       | hypothetical protein |
| TGME49_248540 | p.Leu1484Gln  | missense_variant                       | hypothetical protein |
| TGME49_248540 | p.Glu1475Lys  | missense_variant                       | hypothetical protein |
| TGME49_248540 | p.Ser1274Cys  | missense_variant                       | hypothetical protein |
| TGME49_248540 | p.Leu1204Arg  | missense_variant                       | hypothetical protein |
| TGME49_248540 | p.Ser1181Asn  | missense_variant                       | hypothetical protein |
| TGME49_248540 | p.Val891Leu   | missense_variant                       | hypothetical protein |
| TGME49_248540 | p.Asp797Gly   | missense_variant                       | hypothetical protein |
| TGME49_248540 | p.Asp751Ala   | missense_variant                       | hypothetical protein |
| TGME49_248540 | p.Ser596Ala   | missense_variant&splice_region_variant | hypothetical protein |
| TGME49_248540 | p.Gly413Arg   | missense_variant                       | hypothetical protein |
| TGME49_248540 | p.Ala327Gly   | missense_variant                       | hypothetical protein |
| TGME49_248540 | p.Phe203Val   | missense_variant                       | hypothetical protein |
| TGME49_248540 | p.Phe197Val   | missense_variant                       | hypothetical protein |
| TGME49_248560 | p.Arg223Ser   | missense_variant                       | hypothetical protein |
| TGME49_248560 | p.Gly218Arg   | missense_variant                       | hypothetical protein |
| TGME49_248560 | p.Glu176Gln   | missense_variant                       | hypothetical protein |
| TGME49_248560 | p.Lys168Met   | missense_variant                       | hypothetical protein |
| TGME49_248560 | p.Gly144Arg   | missense_variant                       | hypothetical protein |
| TGME49_248560 | p.Ser56Phe    | missense_variant                       | hypothetical protein |
| TGME49_248560 | p.Cys36Tyr    | missense_variant                       | hypothetical protein |

|               |              |                                                |                      |
|---------------|--------------|------------------------------------------------|----------------------|
| TGME49_248570 | p.Ala162Val  | missense_variant                               | hypothetical protein |
| TGME49_248570 | p.Glu298Lys  | missense_variant                               | hypothetical protein |
| TGME49_248570 | p.Arg310His  | missense_variant                               | hypothetical protein |
| TGME49_248570 | p.Thr311Ala  | missense_variant                               | hypothetical protein |
| TGME49_248570 | p.Thr312Ala  | missense_variant                               | hypothetical protein |
| TGME49_248570 | p.Arg637Gly  | missense_variant                               | hypothetical protein |
| TGME49_248570 | p.Gln747Glu  | missense_variant                               | hypothetical protein |
| TGME49_248570 | p.Ser750Thr  | missense_variant                               | hypothetical protein |
| TGME49_248570 | p.Ile785Val  | missense_variant                               | hypothetical protein |
| TGME49_248570 | p.Gly793Ala  | missense_variant                               | hypothetical protein |
| TGME49_248570 | p.Glu798Asp  | missense_variant                               | hypothetical protein |
| TGME49_248570 | p.Asp854Gly  | missense_variant                               | hypothetical protein |
| TGME49_248570 | p.Leu1246Phe | missense_variant                               | hypothetical protein |
| TGME49_248570 | p.Leu1447Val | missense_variant                               | hypothetical protein |
| TGME49_248570 | p.Ala1688Glu | missense_variant                               | hypothetical protein |
| TGME49_248590 | p.Gln664Leu  | missense_variant                               | hypothetical protein |
| TGME49_248610 | p.Asp520Gly  | missense_variant                               | hypothetical protein |
| TGME49_248620 | p.Asn32His   | missense_variant                               | hypothetical protein |
| TGME49_248620 | c.-38G>T     | 5_prime_UTR_premature_start_codon_gain_variant | hypothetical protein |
| TGME49_248680 | p.Asp1201Gly | missense_variant                               | hypothetical protein |
| TGME49_248680 | p.Ser597Leu  | missense_variant                               | hypothetical protein |
| TGME49_248680 | c.-763C>T    | 5_prime_UTR_premature_start_codon_gain_variant | hypothetical protein |
| TGME49_248710 | p.Leu170Gln  | missense_variant                               | hypothetical protein |
| TGME49_248710 | p.Ala639Thr  | missense_variant                               | hypothetical protein |
| TGME49_248720 | p.Thr1040Pro | missense_variant                               | hypothetical protein |
| TGME49_248720 | p.Gly1259Glu | missense_variant                               | hypothetical protein |
| TGME49_248720 | p.Glu1392Asp | missense_variant                               | hypothetical protein |
| TGME49_248720 | p.Ser1499Arg | missense_variant                               | hypothetical protein |
| TGME49_248720 | p.Gly1946Asp | missense_variant                               | hypothetical protein |
| TGME49_248720 | p.Val1947Gly | missense_variant                               | hypothetical protein |
| TGME49_248740 | p.Leu786Val  | missense_variant                               | hypothetical protein |
| TGME49_248740 | p.Glu324Ala  | missense_variant                               | hypothetical protein |
| TGME49_248740 | p.Gly322Glu  | missense_variant                               | hypothetical protein |
| TGME49_248740 | p.Val319Glu  | missense_variant                               | hypothetical protein |
| TGME49_248740 | p.Val279Leu  | missense_variant                               | hypothetical protein |
| TGME49_248740 | p.Asn193Ser  | missense_variant                               | hypothetical protein |
| TGME49_248740 | p.Ala24Val   | missense_variant                               | hypothetical protein |
| TGME49_248740 | p.Ala24Thr   | missense_variant                               | hypothetical protein |
| TGME49_248740 | c.-410T>G    | 5_prime_UTR_premature_start_codon_gain_variant | hypothetical protein |
| TGME49_248750 | c.2380+7G>T  | splice_region_variant                          | hypothetical protein |
| TGME49_248750 | p.Met492Val  | missense_variant                               | hypothetical protein |
| TGME49_248750 | p.Leu386Phe  | missense_variant                               | hypothetical protein |
| TGME49_248750 | p.Val244Ile  | missense_variant                               | hypothetical protein |
| TGME49_248750 | p.Ala187Thr  | missense_variant                               | hypothetical protein |
| TGME49_248750 | p.Leu172Val  | missense_variant                               | hypothetical protein |
| TGME49_248770 | p.Arg281Leu  | missense_variant                               | hypothetical protein |
| TGME49_248770 | p.Ala32Glu   | missense_variant                               | hypothetical protein |
| TGME49_248790 | c.-534G>T    | 5_prime_UTR_premature_start_codon_gain_variant | hypothetical protein |
| TGME49_248790 | c.-549T>C    | 5_prime_UTR_premature_start_codon_gain_variant | hypothetical protein |
| TGME49_248800 | p.Gly77Asp   | missense_variant                               | hypothetical protein |
| TGME49_248800 | p.Asn91Lys   | missense_variant                               | hypothetical protein |
| TGME49_248800 | p.Asp93Gly   | missense_variant                               | hypothetical protein |
| TGME49_248860 | p.Ser283Phe  | missense_variant                               | hypothetical protein |
| TGME49_248860 | p.Pro173Ala  | missense_variant                               | hypothetical protein |
| TGME49_248860 | p.Trp93Ser   | missense_variant                               | hypothetical protein |
| TGME49_248860 | p.Cys41Arg   | missense_variant                               | hypothetical protein |
| TGME49_248860 | p.Ile29Ser   | missense_variant                               | hypothetical protein |
| TGME49_248900 | p.Pro562Ser  | missense_variant                               | hypothetical protein |
| TGME49_248900 | p.His302Gln  | missense_variant                               | hypothetical protein |
| TGME49_248900 | p.Pro245His  | missense_variant                               | hypothetical protein |
| TGME49_248900 | p.Asp212Glu  | missense_variant                               | hypothetical protein |
| TGME49_248940 | p.Lys206Gln  | missense_variant                               | hypothetical protein |
| TGME49_248990 | p.Ser56Ala   | missense_variant                               | hypothetical protein |
| TGME49_248990 | p.Gln395Lys  | missense_variant                               | hypothetical protein |
| TGME49_249010 | p.Cys407Arg  | missense_variant                               | hypothetical protein |
| TGME49_249010 | c.-1290C>T   | 5_prime_UTR_premature_start_codon_gain_variant | hypothetical protein |
| TGME49_249040 | p.Ser184Ala  | missense_variant                               | hypothetical protein |
| TGME49_249215 | p.Asp517Asn  | missense_variant                               | hypothetical protein |
| TGME49_249215 | p.Val1033Glu | missense_variant                               | hypothetical protein |
| TGME49_249215 | p.Ala1210Pro | missense_variant                               | hypothetical protein |
| TGME49_249230 | p.Ser820Thr  | missense_variant                               | hypothetical protein |
| TGME49_249230 | p.Ala331Thr  | missense_variant                               | hypothetical protein |
| TGME49_249280 | p.Cys130Arg  | missense_variant                               | hypothetical protein |
| TGME49_249280 | p.Glu113Asp  | missense_variant                               | hypothetical protein |
| TGME49_249290 | p.Glu447Asp  | missense_variant                               | hypothetical protein |
| TGME49_249290 | p.Glu46Asp   | missense_variant                               | hypothetical protein |
| TGME49_249310 | c.733-7C>T   | splice_region_variant                          | hypothetical protein |
| TGME49_249340 | p.Glu913Asp  | missense_variant                               | hypothetical protein |
| TGME49_249340 | p.Val777Leu  | missense_variant                               | hypothetical protein |
| TGME49_249340 | p.Ser672Cys  | missense_variant                               | hypothetical protein |
| TGME49_249340 | p.Val649Gly  | missense_variant                               | hypothetical protein |
| TGME49_249340 | p.Arg224Gly  | missense_variant                               | hypothetical protein |
| TGME49_249340 | p.Val81Glu   | missense_variant                               | hypothetical protein |
| TGME49_249340 | p.Val3Met    | missense_variant                               | hypothetical protein |
| TGME49_249365 | p.Phe3Val    | missense_variant                               | hypothetical protein |

|               |                 |                                                |                      |
|---------------|-----------------|------------------------------------------------|----------------------|
| TGME49_249400 | p.Leu280Ser     | missense_variant                               | hypothetical protein |
| TGME49_249410 | p.Ser300Pro     | missense_variant                               | hypothetical protein |
| TGME49_249425 | p.Gly473Ala     | missense_variant                               | hypothetical protein |
| TGME49_249425 | p.Glu391Asp     | missense_variant                               | hypothetical protein |
| TGME49_249425 | p.Gln385Glu     | missense_variant                               | hypothetical protein |
| TGME49_249425 | p.Ala361Val     | missense_variant                               | hypothetical protein |
| TGME49_249425 | p.Val343Ile     | missense_variant                               | hypothetical protein |
| TGME49_249425 | c.604+2T>C      | splice_donor_variant                           | hypothetical protein |
| TGME49_249425 | p.Leu166Pro     | missense_variant                               | hypothetical protein |
| TGME49_249425 | p.Ser149Asn     | missense_variant                               | hypothetical protein |
| TGME49_249425 | p.Asp137Glu     | missense_variant                               | hypothetical protein |
| TGME49_249425 | p.Ser133Phe     | missense_variant                               | hypothetical protein |
| TGME49_249425 | p.Gln117*       | stop_gained                                    | hypothetical protein |
| TGME49_249440 | p.Leu1331Phe    | missense_variant                               | hypothetical protein |
| TGME49_249440 | p.Ala1269Gly    | missense_variant                               | hypothetical protein |
| TGME49_249440 | p.Phe1202Leu    | missense_variant                               | hypothetical protein |
| TGME49_249440 | p.Pro1197Thr    | missense_variant                               | hypothetical protein |
| TGME49_249440 | p.Val860Ile     | missense_variant                               | hypothetical protein |
| TGME49_249450 | p.Thr695Met     | missense_variant                               | hypothetical protein |
| TGME49_249450 | p.Arg519Trp     | missense_variant                               | hypothetical protein |
| TGME49_249450 | p.Arg292Pro     | missense_variant                               | hypothetical protein |
| TGME49_249450 | p.Ala99Thr      | missense_variant                               | hypothetical protein |
| TGME49_249450 | p.Gly15Val      | missense_variant                               | hypothetical protein |
| TGME49_249490 | p.Pro1937Leu    | missense_variant                               | hypothetical protein |
| TGME49_249490 | p.Asp1544Glu    | missense_variant                               | hypothetical protein |
| TGME49_249490 | p.Ala1460Gly    | missense_variant                               | hypothetical protein |
| TGME49_249490 | p.Asp1432Gly    | missense_variant                               | hypothetical protein |
| TGME49_249490 | p.Ala1378Ser    | missense_variant                               | hypothetical protein |
| TGME49_249490 | p.Ala1371Val    | missense_variant                               | hypothetical protein |
| TGME49_249490 | p.Phe1250Val    | missense_variant                               | hypothetical protein |
| TGME49_249490 | p.Ser1226Tyr    | missense_variant                               | hypothetical protein |
| TGME49_249490 | p.Thr1133Ala    | missense_variant                               | hypothetical protein |
| TGME49_249490 | p.Val1026Leu    | missense_variant                               | hypothetical protein |
| TGME49_249490 | p.Pro975Ser     | missense_variant                               | hypothetical protein |
| TGME49_249490 | p.Ser969Arg     | missense_variant                               | hypothetical protein |
| TGME49_249490 | p.Ile804Ser     | missense_variant                               | hypothetical protein |
| TGME49_249490 | p.Ala787Thr     | missense_variant                               | hypothetical protein |
| TGME49_249490 | p.Asp708His     | missense_variant                               | hypothetical protein |
| TGME49_249490 | p.Ala661Glu     | missense_variant                               | hypothetical protein |
| TGME49_249490 | p.Gly510Ser     | missense_variant                               | hypothetical protein |
| TGME49_249490 | p.Lys325Arg     | missense_variant                               | hypothetical protein |
| TGME49_249490 | p.Pro296Leu     | missense_variant                               | hypothetical protein |
| TGME49_249490 | p.Arg254Ser     | missense_variant                               | hypothetical protein |
| TGME49_249535 | p.Pro74Ser      | missense_variant                               | hypothetical protein |
| TGME49_249535 | p.Lys83Glu      | missense_variant&splice_region_variant         | hypothetical protein |
| TGME49_249535 | p.His85Asp      | missense_variant                               | hypothetical protein |
| TGME49_249535 | p.Ter92Glnext*? | stop_lost&splice_region_variant                | hypothetical protein |
| TGME49_249540 | p.Asn1477Thr    | missense_variant                               | hypothetical protein |
| TGME49_249540 | p.Leu1430Val    | missense_variant                               | hypothetical protein |
| TGME49_249540 | p.Gly1366Ala    | missense_variant                               | hypothetical protein |
| TGME49_249540 | p.Ala1246Val    | missense_variant                               | hypothetical protein |
| TGME49_249540 | p.Ala1163Ser    | missense_variant                               | hypothetical protein |
| TGME49_249540 | p.Gly1082Ser    | missense_variant                               | hypothetical protein |
| TGME49_249540 | p.Thr386Ser     | missense_variant                               | hypothetical protein |
| TGME49_249540 | p.Pro257His     | missense_variant                               | hypothetical protein |
| TGME49_249540 | p.Ala46Val      | missense_variant                               | hypothetical protein |
| TGME49_249550 | p.Val649Met     | missense_variant                               | hypothetical protein |
| TGME49_249550 | p.His709Pro     | missense_variant                               | hypothetical protein |
| TGME49_249550 | p.Gly1018Arg    | missense_variant                               | hypothetical protein |
| TGME49_249550 | p.Val1744Met    | missense_variant                               | hypothetical protein |
| TGME49_249570 | p.Leu134Phe     | missense_variant                               | hypothetical protein |
| TGME49_249570 | p.Ala63Thr      | missense_variant                               | hypothetical protein |
| TGME49_249600 | p.Val608Ala     | missense_variant                               | hypothetical protein |
| TGME49_249600 | p.Pro514Leu     | missense_variant                               | hypothetical protein |
| TGME49_249610 | p.Thr1164Ser    | missense_variant                               | hypothetical protein |
| TGME49_249610 | p.Gln1068His    | missense_variant                               | hypothetical protein |
| TGME49_249610 | c.796+4G>T      | splice_region_variant                          | hypothetical protein |
| TGME49_249665 | p.Arg119Gly     | missense_variant                               | hypothetical protein |
| TGME49_249665 | p.Arg61Thr      | missense_variant                               | hypothetical protein |
| TGME49_249685 | p.Pro216Leu     | missense_variant                               | hypothetical protein |
| TGME49_249690 | c.-484C>G       | 5_prime_UTR_premature_start_codon_gain_variant | hypothetical protein |
| TGME49_249690 | p.Arg13Cys      | missense_variant                               | hypothetical protein |
| TGME49_249725 | c.-673T>G       | 5_prime_UTR_premature_start_codon_gain_variant | hypothetical protein |
| TGME49_249725 | p.Lys87Glu      | missense_variant                               | hypothetical protein |
| TGME49_249730 | c.2362-3C>T     | splice_region_variant                          | hypothetical protein |
| TGME49_249730 | c.2362-4T>G     | splice_region_variant                          | hypothetical protein |
| TGME49_249750 | p.Lys14Thr      | missense_variant                               | hypothetical protein |
| TGME49_249780 | p.Glu121Asp     | missense_variant                               | hypothetical protein |
| TGME49_249790 | c.-506T>G       | 5_prime_UTR_premature_start_codon_gain_variant | hypothetical protein |
| TGME49_249800 | p.Thr583Asn     | missense_variant                               | hypothetical protein |
| TGME49_249800 | p.Ala571Ser     | missense_variant                               | hypothetical protein |
| TGME49_249800 | p.Ser431Ala     | missense_variant                               | hypothetical protein |
| TGME49_249800 | p.Leu425Arg     | missense_variant                               | hypothetical protein |
| TGME49_249800 | p.Ala331Thr     | missense_variant                               | hypothetical protein |
| TGME49_249800 | p.Ser285Ala     | missense_variant                               | hypothetical protein |

|               |              |                                                |                      |
|---------------|--------------|------------------------------------------------|----------------------|
| TGME49_249800 | p.Glu128Lys  | missense_variant                               | hypothetical protein |
| TGME49_249800 | p.Thr48Ile   | missense_variant                               | hypothetical protein |
| TGME49_249860 | p.Ala416Thr  | missense_variant                               | hypothetical protein |
| TGME49_249860 | p.Ala351Val  | missense_variant                               | hypothetical protein |
| TGME49_249880 | p.Arg84Gln   | missense_variant                               | hypothetical protein |
| TGME49_249880 | p.Ser601Phe  | missense_variant                               | hypothetical protein |
| TGME49_249880 | p.Trp632Cys  | missense_variant                               | hypothetical protein |
| TGME49_249880 | p.Ser770Pro  | missense_variant                               | hypothetical protein |
| TGME49_249880 | p.Ile1377Leu | missense_variant                               | hypothetical protein |
| TGME49_249890 | p.Ala837Pro  | missense_variant                               | hypothetical protein |
| TGME49_249890 | p.Ala745Thr  | missense_variant                               | hypothetical protein |
| TGME49_249890 | p.Phe611Leu  | missense_variant                               | hypothetical protein |
| TGME49_249890 | p.Phe528Val  | missense_variant                               | hypothetical protein |
| TGME49_249890 | p.Arg278Trp  | missense_variant                               | hypothetical protein |
| TGME49_249890 | p.Ser190Leu  | missense_variant                               | hypothetical protein |
| TGME49_249890 | p.Ser176Phe  | missense_variant                               | hypothetical protein |
| TGME49_249990 | p.Arg727Gly  | missense_variant                               | hypothetical protein |
| TGME49_249990 | p.Thr88Ala   | missense_variant                               | hypothetical protein |
| TGME49_250000 | p.Tyr143His  | missense_variant                               | hypothetical protein |
| TGME49_250000 | p.Trp87*     | stop_gained                                    | hypothetical protein |
| TGME49_250000 | p.Gly85Ser   | missense_variant                               | hypothetical protein |
| TGME49_250030 | p.Phe212Leu  | missense_variant                               | hypothetical protein |
| TGME49_250040 | p.Ile32Thr   | missense_variant                               | hypothetical protein |
| TGME49_250050 | p.Leu2070Arg | missense_variant                               | hypothetical protein |
| TGME49_250050 | p.Ser1992Ala | missense_variant                               | hypothetical protein |
| TGME49_250050 | p.Gln1990His | missense_variant                               | hypothetical protein |
| TGME49_250050 | p.Ala1977Thr | missense_variant                               | hypothetical protein |
| TGME49_250050 | p.Ala1826Gly | missense_variant                               | hypothetical protein |
| TGME49_250050 | p.Ser1676Pro | missense_variant                               | hypothetical protein |
| TGME49_250050 | p.Asp1453Val | missense_variant                               | hypothetical protein |
| TGME49_250050 | p.Pro1291Arg | missense_variant                               | hypothetical protein |
| TGME49_250050 | p.Gln1018Glu | missense_variant                               | hypothetical protein |
| TGME49_250050 | c.2859-4T>G  | splice_region_variant                          | hypothetical protein |
| TGME49_250050 | p.Ala764Val  | missense_variant                               | hypothetical protein |
| TGME49_250050 | p.Ala671Thr  | missense_variant                               | hypothetical protein |
| TGME49_250050 | p.Ala543Val  | missense_variant                               | hypothetical protein |
| TGME49_250050 | p.Leu307Ile  | missense_variant                               | hypothetical protein |
| TGME49_250050 | p.Ala107Val  | missense_variant                               | hypothetical protein |
| TGME49_250090 | p.Pro93Ala   | missense_variant                               | hypothetical protein |
| TGME49_250090 | p.Asn235Ser  | missense_variant                               | hypothetical protein |
| TGME49_250090 | p.Glu726Lys  | missense_variant                               | hypothetical protein |
| TGME49_250090 | p.Thr770Ala  | missense_variant                               | hypothetical protein |
| TGME49_250090 | p.Cys787Tyr  | missense_variant                               | hypothetical protein |
| TGME49_250100 | c.22-8A>T    | splice_region_variant                          | hypothetical protein |
| TGME49_250220 | p.Thr50Asn   | missense_variant                               | hypothetical protein |
| TGME49_250220 | p.Pro159Thr  | missense_variant&splice_region_variant         | hypothetical protein |
| TGME49_250220 | p.Leu289Trp  | missense_variant                               | hypothetical protein |
| TGME49_250220 | p.Glu293Lys  | missense_variant                               | hypothetical protein |
| TGME49_250220 | p.Glu321Ala  | missense_variant                               | hypothetical protein |
| TGME49_250220 | p.Cys352Tyr  | missense_variant                               | hypothetical protein |
| TGME49_250220 | p.Thr354Ser  | missense_variant                               | hypothetical protein |
| TGME49_250330 | p.Ala158Gly  | missense_variant                               | hypothetical protein |
| TGME49_250670 | p.Ala336Glu  | missense_variant                               | hypothetical protein |
| TGME49_250670 | p.Ala97Gly   | missense_variant                               | hypothetical protein |
| TGME49_250670 | p.Ala49Ser   | missense_variant                               | hypothetical protein |
| TGME49_250700 | p.Ala179Val  | missense_variant                               | hypothetical protein |
| TGME49_250700 | p.Gly628Ser  | missense_variant                               | hypothetical protein |
| TGME49_250720 | p.Thr556Lys  | missense_variant                               | hypothetical protein |
| TGME49_250790 | p.Ser125Cys  | missense_variant                               | hypothetical protein |
| TGME49_250790 | p.Pro492Ser  | missense_variant                               | hypothetical protein |
| TGME49_250790 | p.Pro1229Ser | missense_variant                               | hypothetical protein |
| TGME49_250820 | p.His155Asn  | missense_variant                               | hypothetical protein |
| TGME49_250820 | p.Ile343Thr  | missense_variant                               | hypothetical protein |
| TGME49_250820 | p.His578Gln  | missense_variant                               | hypothetical protein |
| TGME49_250820 | p.Ser639Ala  | missense_variant                               | hypothetical protein |
| TGME49_250840 | c.-357T>G    | 5_prime_UTR_premature_start_codon_gain_variant | hypothetical protein |
| TGME49_250840 | c.-192T>G    | 5_prime_UTR_premature_start_codon_gain_variant | hypothetical protein |
| TGME49_250840 | p.Ala138Ser  | missense_variant                               | hypothetical protein |
| TGME49_250840 | c.2331+4G>C  | splice_region_variant                          | hypothetical protein |
| TGME49_250840 | p.Ala802Thr  | missense_variant                               | hypothetical protein |
| TGME49_250910 | c.1254-4A>G  | splice_region_variant                          | hypothetical protein |
| TGME49_250930 | p.Leu34Ile   | missense_variant                               | hypothetical protein |
| TGME49_250940 | p.Pro44Ser   | missense_variant                               | hypothetical protein |
| TGME49_251400 | p.Ala4Val    | missense_variant                               | hypothetical protein |
| TGME49_251400 | p.Ser666Ala  | missense_variant                               | hypothetical protein |
| TGME49_251430 | p.Glu2Gln    | missense_variant                               | hypothetical protein |
| TGME49_251430 | p.Ser104Ile  | missense_variant                               | hypothetical protein |
| TGME49_251430 | p.His476Gln  | missense_variant                               | hypothetical protein |
| TGME49_251450 | p.Ala116Thr  | missense_variant                               | hypothetical protein |
| TGME49_251450 | p.Arg261His  | missense_variant                               | hypothetical protein |
| TGME49_251450 | p.Arg294Lys  | missense_variant                               | hypothetical protein |
| TGME49_251450 | p.Met301Ile  | missense_variant                               | hypothetical protein |
| TGME49_251450 | p.Arg559Gln  | missense_variant                               | hypothetical protein |
| TGME49_251450 | p.Arg1052Gln | missense_variant                               | hypothetical protein |
| TGME49_251450 | p.Gly1094Val | missense_variant                               | hypothetical protein |

|               |              |                                                |                      |
|---------------|--------------|------------------------------------------------|----------------------|
| TGME49_251450 | p.Leu1144Val | missense_variant                               | hypothetical protein |
| TGME49_251450 | p.Ala1334Thr | missense_variant                               | hypothetical protein |
| TGME49_251450 | p.Gly1418Ala | missense_variant                               | hypothetical protein |
| TGME49_251450 | p.Ala1878Glu | missense_variant                               | hypothetical protein |
| TGME49_251450 | p.Ser1985Thr | missense_variant                               | hypothetical protein |
| TGME49_251450 | p.Leu1987Val | missense_variant                               | hypothetical protein |
| TGME49_251450 | p.Met2258Ile | missense_variant                               | hypothetical protein |
| TGME49_251450 | p.Arg2270Lys | missense_variant                               | hypothetical protein |
| TGME49_251460 | p.Ser1008Thr | missense_variant                               | hypothetical protein |
| TGME49_251460 | p.Val987Gly  | missense_variant                               | hypothetical protein |
| TGME49_251460 | p.Arg954Trp  | missense_variant                               | hypothetical protein |
| TGME49_251460 | p.Ser893Leu  | missense_variant                               | hypothetical protein |
| TGME49_251460 | p.Ile738Val  | missense_variant                               | hypothetical protein |
| TGME49_251460 | p.Pro277Leu  | missense_variant                               | hypothetical protein |
| TGME49_251460 | p.Ala1051Thr | missense_variant                               | hypothetical protein |
| TGME49_251460 | p.His93Tyr   | missense_variant                               | hypothetical protein |
| TGME49_251460 | c.-136C>G    | 5_prime_UTR_premature_start_codon_gain_variant | hypothetical protein |
| TGME49_251460 | c.-448C>T    | 5_prime_UTR_premature_start_codon_gain_variant | hypothetical protein |
| TGME49_251520 | p.Ala134Val  | missense_variant                               | hypothetical protein |
| TGME49_251520 | p.Pro48Arg   | missense_variant                               | hypothetical protein |
| TGME49_251530 | p.Leu17Gln   | missense_variant                               | hypothetical protein |
| TGME49_251560 | p.Ser41Asn   | missense_variant                               | hypothetical protein |
| TGME49_251560 | p.Ala71Ser   | missense_variant                               | hypothetical protein |
| TGME49_251560 | p.Ala71Val   | missense_variant                               | hypothetical protein |
| TGME49_251560 | p.Arg169Gln  | missense_variant                               | hypothetical protein |
| TGME49_251560 | p.Glu392Lys  | missense_variant                               | hypothetical protein |
| TGME49_251560 | p.Pro659Ser  | missense_variant                               | hypothetical protein |
| TGME49_251560 | p.Ala750Gly  | missense_variant                               | hypothetical protein |
| TGME49_251560 | p.Ser780Phe  | missense_variant                               | hypothetical protein |
| TGME49_251560 | p.Glu820Lys  | missense_variant                               | hypothetical protein |
| TGME49_251560 | p.Asp852Asn  | missense_variant                               | hypothetical protein |
| TGME49_251560 | p.Arg904Cys  | missense_variant                               | hypothetical protein |
| TGME49_251560 | p.Glu989Lys  | missense_variant                               | hypothetical protein |
| TGME49_251560 | p.Val1027Asp | missense_variant                               | hypothetical protein |
| TGME49_251560 | p.Asp1285His | missense_variant                               | hypothetical protein |
| TGME49_251560 | p.Ile1345Thr | missense_variant                               | hypothetical protein |
| TGME49_251560 | p.Gly1607Val | missense_variant                               | hypothetical protein |
| TGME49_251560 | p.Ser1656Asn | missense_variant                               | hypothetical protein |
| TGME49_251580 | p.Val46Leu   | missense_variant                               | hypothetical protein |
| TGME49_251590 | p.Arg729Lys  | missense_variant                               | hypothetical protein |
| TGME49_251590 | p.Arg272Lys  | missense_variant                               | hypothetical protein |
| TGME49_251590 | p.Thr34Arg   | missense_variant                               | hypothetical protein |
| TGME49_251590 | p.Ser20Cys   | missense_variant                               | hypothetical protein |
| TGME49_251590 | p.Phe11Leu   | missense_variant                               | hypothetical protein |
| TGME49_251610 | c.-76C>T     | 5_prime_UTR_premature_start_codon_gain_variant | hypothetical protein |
| TGME49_251610 | p.Ser176Pro  | missense_variant                               | hypothetical protein |
| TGME49_251610 | p.Ala388Pro  | missense_variant                               | hypothetical protein |
| TGME49_251610 | p.Gly563Arg  | missense_variant                               | hypothetical protein |
| TGME49_251610 | p.Ser712Thr  | missense_variant                               | hypothetical protein |
| TGME49_251650 | p.Val2Ile    | missense_variant                               | hypothetical protein |
| TGME49_251650 | p.Phe3Ile    | missense_variant                               | hypothetical protein |
| TGME49_251650 | p.Val16Ile   | missense_variant                               | hypothetical protein |
| TGME49_251650 | p.Arg134Gln  | missense_variant                               | hypothetical protein |
| TGME49_251650 | p.Lys141*    | stop_gained                                    | hypothetical protein |
| TGME49_251650 | c.*71C>T     | splice_region_variant                          | hypothetical protein |
| TGME49_251660 | p.Gln41His   | missense_variant                               | hypothetical protein |
| TGME49_251660 | p.Asp47Gly   | missense_variant                               | hypothetical protein |
| TGME49_251660 | p.Ala57Glu   | missense_variant                               | hypothetical protein |
| TGME49_251660 | p.Ala104Glu  | missense_variant                               | hypothetical protein |
| TGME49_251665 | p.Ser28Arg   | missense_variant                               | hypothetical protein |
| TGME49_251665 | p.Thr37Ile   | missense_variant                               | hypothetical protein |
| TGME49_251665 | p.Ser146Asn  | missense_variant                               | hypothetical protein |
| TGME49_251665 | p.Ile181Thr  | missense_variant                               | hypothetical protein |
| TGME49_251665 | p.Asp184His  | missense_variant                               | hypothetical protein |
| TGME49_251730 | c.-123C>G    | 5_prime_UTR_premature_start_codon_gain_variant | hypothetical protein |
| TGME49_251730 | p.Asn387Thr  | missense_variant                               | hypothetical protein |
| TGME49_251730 | p.Cys1131Arg | missense_variant                               | hypothetical protein |
| TGME49_251730 | p.Ala1149Val | missense_variant                               | hypothetical protein |
| TGME49_251730 | p.Ser1335Thr | missense_variant                               | hypothetical protein |
| TGME49_251770 | p.Gly1173Asp | missense_variant                               | hypothetical protein |
| TGME49_251770 | p.Thr665Ala  | missense_variant                               | hypothetical protein |
| TGME49_251770 | p.Leu577Gln  | missense_variant                               | hypothetical protein |
| TGME49_251770 | p.Gly553Asp  | missense_variant                               | hypothetical protein |
| TGME49_251770 | c.235+7T>G   | splice_region_variant                          | hypothetical protein |
| TGME49_251770 | c.-440C>T    | 5_prime_UTR_premature_start_codon_gain_variant | hypothetical protein |
| TGME49_251790 | c.-1148G>A   | 5_prime_UTR_premature_start_codon_gain_variant | hypothetical protein |
| TGME49_251790 | c.-887C>T    | 5_prime_UTR_premature_start_codon_gain_variant | hypothetical protein |
| TGME49_251790 | p.Arg80Gln   | missense_variant                               | hypothetical protein |
| TGME49_251790 | p.Glu203Asp  | missense_variant                               | hypothetical protein |
| TGME49_251800 | p.Thr285Lys  | missense_variant                               | hypothetical protein |
| TGME49_251800 | p.Pro29Ser   | missense_variant                               | hypothetical protein |
| TGME49_251820 | p.Ile287Val  | missense_variant                               | hypothetical protein |
| TGME49_251820 | p.Ala123Val  | missense_variant                               | hypothetical protein |
| TGME49_251830 | p.Val58Ala   | missense_variant                               | hypothetical protein |
| TGME49_251855 | c.-367C>T    | 5_prime_UTR_premature_start_codon_gain_variant | hypothetical protein |



|               |              |                                                |                      |
|---------------|--------------|------------------------------------------------|----------------------|
| TGME49_251860 | p.Gln139Glu  | missense_variant                               | hypothetical protein |
| TGME49_251890 | p.Glu1640Asp | missense_variant                               | hypothetical protein |
| TGME49_251890 | p.Val1483Met | missense_variant                               | hypothetical protein |
| TGME49_251890 | p.Cys960Ser  | missense_variant                               | hypothetical protein |
| TGME49_251890 | p.Val642Ile  | missense_variant                               | hypothetical protein |
| TGME49_251890 | c.1902-8T>G  | splice_region_variant                          | hypothetical protein |
| TGME49_251890 | p.Lys558Glu  | missense_variant                               | hypothetical protein |
| TGME49_251890 | p.Glu183Asp  | missense_variant                               | hypothetical protein |
| TGME49_251890 | p.Arg89Trp   | missense_variant                               | hypothetical protein |
| TGME49_251890 | p.Val20Ala   | missense_variant                               | hypothetical protein |
| TGME49_251890 | p.Ala12Val   | missense_variant                               | hypothetical protein |
| TGME49_251920 | p.Gly736Arg  | missense_variant                               | hypothetical protein |
| TGME49_251920 | p.Asn355His  | missense_variant                               | hypothetical protein |
| TGME49_251920 | p.Gly300Ser  | missense_variant                               | hypothetical protein |
| TGME49_278965 | p.Ile273Lys  | missense_variant                               | hypothetical protein |
| TGME49_278920 | p.Gly102Ser  | missense_variant                               | hypothetical protein |
| TGME49_278920 | c.-894C>T    | 5_prime_UTR_premature_start_codon_gain_variant | hypothetical protein |
| TGME49_278890 | p.Glu136Asp  | missense_variant                               | hypothetical protein |
| TGME49_278890 | p.Pro161Ser  | missense_variant                               | hypothetical protein |
| TGME49_278890 | c.2317-8T>A  | splice_region_variant                          | hypothetical protein |
| TGME49_278860 | p.Thr385Ile  | missense_variant                               | hypothetical protein |
| TGME49_278860 | p.Lys239Gln  | missense_variant                               | hypothetical protein |
| TGME49_278860 | c.128-5G>C   | splice_region_variant                          | hypothetical protein |
| TGME49_278860 | c.128-6C>T   | splice_region_variant                          | hypothetical protein |
| TGME49_278840 | p.Ser221Thr  | missense_variant                               | hypothetical protein |
| TGME49_278840 | p.Tyr300His  | missense_variant                               | hypothetical protein |
| TGME49_278815 | p.Arg7Gln    | missense_variant                               | hypothetical protein |
| TGME49_278815 | p.Leu121Val  | missense_variant                               | hypothetical protein |
| TGME49_278815 | p.Cys142Arg  | missense_variant                               | hypothetical protein |
| TGME49_278815 | p.Arg243Gly  | missense_variant                               | hypothetical protein |
| TGME49_278815 | p.Pro291His  | missense_variant                               | hypothetical protein |
| TGME49_278815 | p.Arg321His  | missense_variant                               | hypothetical protein |
| TGME49_278815 | p.Gly382Asp  | missense_variant                               | hypothetical protein |
| TGME49_278815 | p.Glu646Gln  | missense_variant                               | hypothetical protein |
| TGME49_278815 | p.Val955Ala  | missense_variant                               | hypothetical protein |
| TGME49_278815 | p.Gly1381Arg | missense_variant                               | hypothetical protein |
| TGME49_278815 | p.Gly1609Arg | missense_variant                               | hypothetical protein |
| TGME49_278815 | p.Ile1685Leu | missense_variant                               | hypothetical protein |
| TGME49_278815 | p.Ala1790Glu | missense_variant                               | hypothetical protein |
| TGME49_278815 | p.Ser1919Leu | missense_variant                               | hypothetical protein |
| TGME49_278780 | p.Ser47Pro   | missense_variant                               | hypothetical protein |
| TGME49_278770 | p.Arg946His  | missense_variant                               | hypothetical protein |
| TGME49_278770 | c.2578-5T>C  | splice_region_variant                          | hypothetical protein |
| TGME49_278770 | p.Thr812Ile  | missense_variant                               | hypothetical protein |
| TGME49_278770 | p.Asp226Gly  | missense_variant                               | hypothetical protein |
| TGME49_278770 | p.Ser177Pro  | missense_variant                               | hypothetical protein |
| TGME49_278770 | c.-538A>G    | 5_prime_UTR_premature_start_codon_gain_variant | hypothetical protein |
| TGME49_278760 | p.Pro1073Leu | missense_variant                               | hypothetical protein |
| TGME49_278760 | p.Arg1041Lys | missense_variant                               | hypothetical protein |
| TGME49_278760 | p.Trp957Cys  | missense_variant                               | hypothetical protein |
| TGME49_278760 | p.Val691Ile  | missense_variant                               | hypothetical protein |
| TGME49_278760 | p.Asp531Val  | missense_variant                               | hypothetical protein |
| TGME49_278760 | c.-181A>G    | 5_prime_UTR_premature_start_codon_gain_variant | hypothetical protein |
| TGME49_278753 | p.Gly182Arg  | missense_variant                               | hypothetical protein |
| TGME49_278720 | p.Gln334Leu  | missense_variant                               | hypothetical protein |
| TGME49_278720 | p.Ser83Ala   | missense_variant                               | hypothetical protein |
| TGME49_278710 | p.Arg620His  | missense_variant                               | hypothetical protein |
| TGME49_278710 | p.Ala732Thr  | missense_variant                               | hypothetical protein |
| TGME49_278710 | p.Gly733Asp  | missense_variant                               | hypothetical protein |
| TGME49_278710 | p.Ile741Val  | missense_variant                               | hypothetical protein |
| TGME49_278680 | p.Asn160Ser  | missense_variant                               | hypothetical protein |
| TGME49_278680 | p.Val148Met  | missense_variant                               | hypothetical protein |
| TGME49_278580 | p.Leu247Val  | missense_variant                               | hypothetical protein |
| TGME49_278540 | p.Pro69Thr   | missense_variant                               | hypothetical protein |
| TGME49_278540 | p.Ala9Val    | missense_variant                               | hypothetical protein |
| TGME49_278522 | c.25-4A>T    | splice_region_variant                          | hypothetical protein |
| TGME49_278522 | p.Glu67Val   | missense_variant                               | hypothetical protein |
| TGME49_278470 | p.Pro206Arg  | missense_variant                               | hypothetical protein |
| TGME49_278470 | p.Asp577Gly  | missense_variant                               | hypothetical protein |
| TGME49_278460 | c.-217A>G    | 5_prime_UTR_premature_start_codon_gain_variant | hypothetical protein |
| TGME49_278460 | c.-330C>T    | 5_prime_UTR_premature_start_codon_gain_variant | hypothetical protein |
| TGME49_278460 | c.-1166C>A   | 5_prime_UTR_premature_start_codon_gain_variant | hypothetical protein |
| TGME49_278250 | p.Val89Ala   | missense_variant                               | hypothetical protein |
| TGME49_278250 | p.Arg96Pro   | missense_variant                               | hypothetical protein |
| TGME49_278250 | p.Leu167Ser  | missense_variant                               | hypothetical protein |
| TGME49_278250 | c.2157+3A>T  | splice_region_variant                          | hypothetical protein |
| TGME49_278205 | p.Ala4917Thr | missense_variant                               | hypothetical protein |
| TGME49_278205 | p.Ser4907Phe | missense_variant                               | hypothetical protein |
| TGME49_278205 | p.Asn4830Thr | missense_variant                               | hypothetical protein |
| TGME49_278205 | p.Ala4535Thr | missense_variant                               | hypothetical protein |
| TGME49_278205 | p.Ile4396Thr | missense_variant                               | hypothetical protein |
| TGME49_278205 | p.Glu4353Asp | missense_variant                               | hypothetical protein |
| TGME49_278205 | p.Ser4236Asn | missense_variant                               | hypothetical protein |
| TGME49_278205 | p.Arg4151Thr | missense_variant                               | hypothetical protein |
| TGME49_278205 | p.Gln4006His | missense_variant                               | hypothetical protein |

|               |              |                                                |                      |
|---------------|--------------|------------------------------------------------|----------------------|
| TGME49_278205 | p.Leu3977Val | missense_variant                               | hypothetical protein |
| TGME49_278205 | p.Gly3787Ala | missense_variant                               | hypothetical protein |
| TGME49_278205 | p.Arg3443Ser | missense_variant                               | hypothetical protein |
| TGME49_278205 | p.Cys2699Ser | missense_variant                               | hypothetical protein |
| TGME49_278205 | p.Asp1958Asn | missense_variant                               | hypothetical protein |
| TGME49_278205 | p.Arg989His  | missense_variant                               | hypothetical protein |
| TGME49_278180 | p.Ala155Ser  | missense_variant                               | hypothetical protein |
| TGME49_278145 | p.Leu304Phe  | missense_variant                               | hypothetical protein |
| TGME49_278145 | p.Lys101Ile  | missense_variant                               | hypothetical protein |
| TGME49_278130 | p.Arg1041His | missense_variant                               | hypothetical protein |
| TGME49_278130 | p.Glu920Gln  | missense_variant                               | hypothetical protein |
| TGME49_278130 | c.1233-6T>A  | splice_region_variant                          | hypothetical protein |
| TGME49_278030 | p.Arg956Lys  | missense_variant                               | hypothetical protein |
| TGME49_278030 | p.Val1047Met | missense_variant                               | hypothetical protein |
| TGME49_278030 | p.Thr1133Ala | missense_variant                               | hypothetical protein |
| TGME49_278030 | p.Arg1231Gly | missense_variant                               | hypothetical protein |
| TGME49_278030 | p.His1909Gln | missense_variant                               | hypothetical protein |
| TGME49_278030 | p.Asp1939Glu | missense_variant                               | hypothetical protein |
| TGME49_278030 | p.Gly1987Glu | missense_variant                               | hypothetical protein |
| TGME49_278030 | p.Ala2002Ser | missense_variant                               | hypothetical protein |
| TGME49_278030 | p.Ala2002Val | missense_variant                               | hypothetical protein |
| TGME49_278030 | p.Gly2079Ser | missense_variant                               | hypothetical protein |
| TGME49_278020 | p.Arg808Thr  | missense_variant                               | hypothetical protein |
| TGME49_278020 | p.Ala717Glu  | missense_variant                               | hypothetical protein |
| TGME49_278020 | p.Leu572His  | missense_variant                               | hypothetical protein |
| TGME49_278020 | p.Val403Met  | missense_variant                               | hypothetical protein |
| TGME49_278020 | p.Gly257Ser  | missense_variant                               | hypothetical protein |
| TGME49_278020 | p.Ser174Cys  | missense_variant                               | hypothetical protein |
| TGME49_278020 | p.Asp156Gly  | missense_variant                               | hypothetical protein |
| TGME49_277940 | p.Ser2769Ala | missense_variant                               | hypothetical protein |
| TGME49_277940 | p.Arg2363Ile | missense_variant                               | hypothetical protein |
| TGME49_277940 | p.Ser2323Pro | missense_variant                               | hypothetical protein |
| TGME49_277940 | p.Gln2054Lys | missense_variant                               | hypothetical protein |
| TGME49_277940 | p.Ile1918Phe | missense_variant                               | hypothetical protein |
| TGME49_277940 | p.Ser1500Pro | missense_variant                               | hypothetical protein |
| TGME49_277940 | p.Val1218Gly | missense_variant                               | hypothetical protein |
| TGME49_277940 | p.Phe406Cys  | missense_variant                               | hypothetical protein |
| TGME49_277930 | p.Leu1041Phe | missense_variant                               | hypothetical protein |
| TGME49_277930 | p.Val968Ile  | missense_variant                               | hypothetical protein |
| TGME49_277930 | p.His956Tyr  | missense_variant                               | hypothetical protein |
| TGME49_277930 | p.Thr335Ile  | missense_variant                               | hypothetical protein |
| TGME49_277930 | p.Lys328Arg  | missense_variant                               | hypothetical protein |
| TGME49_277930 | p.Asp302Gly  | missense_variant                               | hypothetical protein |
| TGME49_277930 | p.Ala295Thr  | missense_variant                               | hypothetical protein |
| TGME49_277930 | p.Leu275Ile  | missense_variant                               | hypothetical protein |
| TGME49_277930 | c.798-3T>C   | splice_region_variant                          | hypothetical protein |
| TGME49_277920 | p.Thr17Arg   | missense_variant                               | hypothetical protein |
| TGME49_277880 | p.Ala185Thr  | missense_variant                               | hypothetical protein |
| TGME49_277870 | c.-1137C>T   | 5_prime_UTR_premature_start_codon_gain_variant | hypothetical protein |
| TGME49_277870 | p.Glu109Val  | missense_variant                               | hypothetical protein |
| TGME49_277870 | c.*1259A>C   | splice_region_variant                          | hypothetical protein |
| TGME49_277860 | p.Phe118Ile  | missense_variant                               | hypothetical protein |
| TGME49_277860 | p.Gln40Arg   | missense_variant                               | hypothetical protein |
| TGME49_277860 | p.Ser38Ala   | missense_variant                               | hypothetical protein |
| TGME49_277860 | c.-140C>T    | 5_prime_UTR_premature_start_codon_gain_variant | hypothetical protein |
| TGME49_277830 | p.Ser129Pro  | missense_variant                               | hypothetical protein |
| TGME49_277830 | p.Ala80Ser   | missense_variant                               | hypothetical protein |
| TGME49_277830 | p.Ser35Leu   | missense_variant                               | hypothetical protein |
| TGME49_277820 | p.Leu58Phe   | missense_variant                               | hypothetical protein |
| TGME49_277820 | p.Asp140Glu  | missense_variant                               | hypothetical protein |
| TGME49_277820 | p.Ser197Arg  | missense_variant                               | hypothetical protein |
| TGME49_277820 | p.Lys229Gln  | missense_variant                               | hypothetical protein |
| TGME49_277820 | p.Glu389Lys  | missense_variant                               | hypothetical protein |
| TGME49_277820 | p.Gln607Pro  | missense_variant                               | hypothetical protein |
| TGME49_277820 | p.Ser881Asn  | missense_variant                               | hypothetical protein |
| TGME49_277820 | p.Ala1049Thr | missense_variant                               | hypothetical protein |
| TGME49_277820 | p.Ala1189Val | missense_variant                               | hypothetical protein |
| TGME49_277820 | p.Pro1195Ser | missense_variant                               | hypothetical protein |
| TGME49_277810 | c.-2C>G      | 5_prime_UTR_premature_start_codon_gain_variant | hypothetical protein |
| TGME49_277790 | p.Glu1353Ala | missense_variant                               | hypothetical protein |
| TGME49_277790 | p.Glu1338Asp | missense_variant                               | hypothetical protein |
| TGME49_277790 | p.Ser1228Asn | missense_variant                               | hypothetical protein |
| TGME49_277790 | p.Asn1222Ser | missense_variant                               | hypothetical protein |
| TGME49_277790 | p.Pro1092Ala | missense_variant                               | hypothetical protein |
| TGME49_277790 | p.Ile577Val  | missense_variant                               | hypothetical protein |
| TGME49_277790 | c.-960G>A    | 5_prime_UTR_premature_start_codon_gain_variant | hypothetical protein |
| TGME49_277780 | p.Asp135Asn  | missense_variant                               | hypothetical protein |
| TGME49_277770 | p.Arg821His  | missense_variant                               | hypothetical protein |
| TGME49_277770 | p.Gly721Ser  | missense_variant                               | hypothetical protein |
| TGME49_277770 | p.Gly372Glu  | missense_variant                               | hypothetical protein |
| TGME49_277770 | p.Arg295Ser  | missense_variant                               | hypothetical protein |
| TGME49_277770 | p.Lys102Arg  | missense_variant                               | hypothetical protein |
| TGME49_277770 | p.Lys102Glu  | missense_variant                               | hypothetical protein |
| TGME49_277770 | c.-13-7T>G   | splice_region_variant                          | hypothetical protein |
| TGME49_277730 | p.Trp3*      | stop_gained                                    | hypothetical protein |

|               |              |                                                |                                                               |
|---------------|--------------|------------------------------------------------|---------------------------------------------------------------|
| TGME49_277730 | p.Pro75Ser   | missense_variant                               | hypothetical protein                                          |
| TGME49_277730 | p.Lys108Asn  | missense_variant                               | hypothetical protein                                          |
| TGME49_277730 | p.Ser109Phe  | missense_variant                               | hypothetical protein                                          |
| TGME49_277710 | p.Cys130Ser  | missense_variant                               | hypothetical protein                                          |
| TGME49_277710 | p.Pro16Ala   | missense_variant                               | hypothetical protein                                          |
| TGME49_277710 | c.-559C>T    | 5_prime_UTR_premature_start_codon_gain_variant | hypothetical protein                                          |
| TGME49_277710 | c.-934C>G    | 5_prime_UTR_premature_start_codon_gain_variant | hypothetical protein                                          |
| TGME49_277705 | p.Leu14Val   | missense_variant                               | hypothetical protein                                          |
| TGME49_277705 | p.Glu31Lys   | missense_variant                               | hypothetical protein                                          |
| TGME49_277690 | c.-96C>G     | 5_prime_UTR_premature_start_codon_gain_variant | hypothetical protein                                          |
| TGME49_277560 | p.Arg202Lys  | missense_variant                               | hypothetical protein                                          |
| TGME49_277560 | p.Pro491Arg  | missense_variant                               | hypothetical protein                                          |
| TGME49_277560 | p.His586Asp  | missense_variant                               | hypothetical protein                                          |
| TGME49_277560 | p.Pro589Ser  | missense_variant                               | hypothetical protein                                          |
| TGME49_277560 | p.Asn598Asp  | missense_variant                               | hypothetical protein                                          |
| TGME49_277560 | p.Thr629Ala  | missense_variant                               | hypothetical protein                                          |
| TGME49_277560 | p.Ala786Pro  | missense_variant                               | hypothetical protein                                          |
| TGME49_277560 | p.Leu855Pro  | missense_variant                               | hypothetical protein                                          |
| TGME49_277560 | p.Pro949Ser  | missense_variant                               | hypothetical protein                                          |
| TGME49_277560 | p.Gly1137Ala | missense_variant                               | hypothetical protein                                          |
| TGME49_277560 | p.Ala1359Glu | missense_variant                               | hypothetical protein                                          |
| TGME49_277560 | p.Glu1651Asp | missense_variant                               | hypothetical protein                                          |
| TGME49_277560 | p.Lys1692Thr | missense_variant                               | hypothetical protein                                          |
| TGME49_277560 | p.Arg1701His | missense_variant                               | hypothetical protein                                          |
| TGME49_277560 | p.Ala1768Val | missense_variant                               | hypothetical protein                                          |
| TGME49_277540 | p.Ser2023Pro | missense_variant                               | hypothetical protein                                          |
| TGME49_277540 | p.Asp1996Gly | missense_variant                               | hypothetical protein                                          |
| TGME49_277540 | p.Gly1934Ala | missense_variant                               | hypothetical protein                                          |
| TGME49_277540 | p.Thr1928Met | missense_variant                               | hypothetical protein                                          |
| TGME49_277540 | p.Asp1863Asn | missense_variant                               | hypothetical protein                                          |
| TGME49_277540 | p.Gly1856Asp | missense_variant                               | hypothetical protein                                          |
| TGME49_277540 | p.Ala1728Ser | missense_variant                               | hypothetical protein                                          |
| TGME49_277540 | p.Ser1604Ala | missense_variant                               | hypothetical protein                                          |
| TGME49_277540 | p.Met1335Lys | missense_variant                               | hypothetical protein                                          |
| TGME49_277540 | p.Gln1322Arg | missense_variant                               | hypothetical protein                                          |
| TGME49_277540 | p.Pro1253Ser | missense_variant                               | hypothetical protein                                          |
| TGME49_277540 | p.Leu487Gln  | missense_variant                               | hypothetical protein                                          |
| TGME49_277540 | p.Arg439Ser  | missense_variant                               | hypothetical protein                                          |
| TGME49_277540 | p.Ala437Thr  | missense_variant                               | hypothetical protein                                          |
| TGME49_277540 | p.Glu316Gln  | missense_variant                               | hypothetical protein                                          |
| TGME49_277490 | p.Leu2264Val | missense_variant                               | hypothetical protein                                          |
| TGME49_277490 | p.Gly2190Ala | missense_variant                               | hypothetical protein                                          |
| TGME49_277490 | p.Phe2067Leu | missense_variant                               | hypothetical protein                                          |
| TGME49_277490 | p.Pro1870Leu | missense_variant                               | hypothetical protein                                          |
| TGME49_277490 | p.Thr1274Ala | missense_variant                               | hypothetical protein                                          |
| TGME49_277490 | p.Glu1272Lys | missense_variant                               | hypothetical protein                                          |
| TGME49_277490 | p.Ser952Arg  | missense_variant                               | hypothetical protein                                          |
| TGME49_277490 | p.Thr121Ala  | missense_variant                               | hypothetical protein                                          |
| TGME49_277490 | p.Ala101Thr  | missense_variant                               | hypothetical protein                                          |
| TGME49_277490 | p.His32Arg   | missense_variant                               | hypothetical protein                                          |
| TGME49_277260 | p.Glu1598Ala | missense_variant                               | hypothetical protein                                          |
| TGME49_277260 | p.Arg1339Leu | missense_variant                               | hypothetical protein                                          |
| TGME49_277260 | c.3373-5C>A  | splice_region_variant                          | hypothetical protein                                          |
| TGME49_277260 | p.Ile1118Leu | missense_variant                               | hypothetical protein                                          |
| TGME49_277260 | p.Val575Ile  | missense_variant                               | hypothetical protein                                          |
| TGME49_277260 | p.Ile320Leu  | missense_variant                               | hypothetical protein                                          |
| TGME49_277260 | p.Ser303Tyr  | missense_variant                               | hypothetical protein                                          |
| TGME49_277260 | p.Thr236Met  | missense_variant                               | hypothetical protein                                          |
| TGME49_277260 | p.Asp233Gly  | missense_variant                               | hypothetical protein                                          |
| TGME49_277260 | c.-2178C>T   | 5_prime_UTR_premature_start_codon_gain_variant | hypothetical protein                                          |
| TGME49_277260 | c.-3112G>A   | 5_prime_UTR_premature_start_codon_gain_variant | hypothetical protein                                          |
| TGME49_277230 | p.Ser391Pro  | missense_variant                               | hypothetical protein                                          |
| TGME49_277220 | p.Ala473Ser  | missense_variant                               | hypothetical protein                                          |
| TGME49_277220 | p.Gly395Ser  | missense_variant                               | hypothetical protein                                          |
| TGME49_277220 | p.Val354Ile  | missense_variant                               | hypothetical protein                                          |
| TGME49_277220 | p.Ala273Gly  | missense_variant                               | hypothetical protein                                          |
| TGME49_277220 | p.Arg211His  | missense_variant                               | hypothetical protein                                          |
| TGME49_277060 | p.Gly1480Ala | missense_variant                               | hypothetical protein                                          |
| TGME49_277060 | p.Cys1406Arg | missense_variant                               | hypothetical protein                                          |
| TGME49_277060 | p.Arg1228Ser | missense_variant                               | hypothetical protein                                          |
| TGME49_277060 | p.Ser1037Leu | missense_variant                               | hypothetical protein                                          |
| TGME49_277060 | c.-338C>T    | 5_prime_UTR_premature_start_codon_gain_variant | hypothetical protein                                          |
| TGME49_277020 | p.Met91Val   | missense_variant                               | hypothetical protein                                          |
| TGME49_277020 | p.Arg19Gly   | missense_variant                               | hypothetical protein                                          |
| TGME49_276980 | p.Pro56Ser   | missense_variant                               | hypothetical protein                                          |
| TGME49_276970 | p.Ala189Val  | missense_variant                               | hypothetical protein                                          |
| TGME49_276970 | p.Ala351Thr  | missense_variant                               | hypothetical protein                                          |
| TGME49_276860 | p.Ala120Val  | missense_variant                               | hypothetical protein                                          |
| TGME49_276840 | p.Gly133Glu  | missense_variant                               | hypothetical protein                                          |
| TGME49_214620 | p.Ala206Thr  | missense_variant                               | hypoxia- inducible factor prolyl hydroxylase (phd2), putative |
| TGME49_278975 | c.-152C>T    | 5_prime_UTR_premature_start_codon_gain_variant | ICE family protease (caspase) p20 domain-containing protein   |
| TGME49_319090 | p.Gln675Arg  | missense_variant                               | IgA-specific serine endopeptidase                             |
| TGME49_319090 | p.Asp844Glu  | missense_variant                               | IgA-specific serine endopeptidase                             |
| TGME49_222710 | p.Ser14Leu   | missense_variant                               | IMP-specific 5'-nucleotidase 1, putative                      |
| TGME49_222710 | p.Ser40Pro   | missense_variant                               | IMP-specific 5'-nucleotidase 1, putative                      |

|               |              |                                                |                                                                     |
|---------------|--------------|------------------------------------------------|---------------------------------------------------------------------|
| TGME49_222710 | p.Ala59Ser   | missense_variant                               | IMP-specific 5'-nucleotidase 1, putative                            |
| TGME49_251600 | p.Val110Ile  | missense_variant                               | IMP4 family U3 small nucleolar ribonucleoprotein (snoRNP), putative |
| TGME49_234580 | p.Asp984Gly  | missense_variant                               | ImpB/MucB/SamB family protein                                       |
| TGME49_234580 | p.Cys979Ser  | missense_variant                               | ImpB/MucB/SamB family protein                                       |
| TGME49_234580 | p.Val825Met  | missense_variant                               | ImpB/MucB/SamB family protein                                       |
| TGME49_234580 | p.Ala106Ser  | missense_variant                               | ImpB/MucB/SamB family protein                                       |
| TGME49_234580 | p.Ile105Thr  | missense_variant                               | ImpB/MucB/SamB family protein                                       |
| TGME49_222380 | c.-3574A>G   | 5_prime_UTR_premature_start_codon_gain_variant | importin-beta N-terminal domain-containing protein                  |
| TGME49_222380 | c.-2085T>G   | 5_prime_UTR_premature_start_codon_gain_variant | importin-beta N-terminal domain-containing protein                  |
| TGME49_222380 | c.-630C>T    | 5_prime_UTR_premature_start_codon_gain_variant | importin-beta N-terminal domain-containing protein                  |
| TGME49_207180 | p.Pro49Ser   | missense_variant                               | indole-3-glycerol phosphate synthase domain-containing protein      |
| TGME49_207180 | p.Met65Val   | missense_variant                               | indole-3-glycerol phosphate synthase domain-containing protein      |
| TGME49_207180 | p.Thr1049Ser | missense_variant                               | indole-3-glycerol phosphate synthase domain-containing protein      |
| TGME49_207180 | p.Gln1146Arg | missense_variant                               | indole-3-glycerol phosphate synthase domain-containing protein      |
| TGME49_207180 | p.Gln1405Lys | missense_variant                               | indole-3-glycerol phosphate synthase domain-containing protein      |
| TGME49_238995 | p.His2104Tyr | missense_variant                               | ion channel protein                                                 |
| TGME49_277030 | p.His2348Asp | missense_variant                               | isoleucyl-tRNA synthetase, putative                                 |
| TGME49_277030 | p.Glu2242Gly | missense_variant                               | isoleucyl-tRNA synthetase, putative                                 |
| TGME49_277030 | p.Thr1977Pro | missense_variant                               | isoleucyl-tRNA synthetase, putative                                 |
| TGME49_277030 | p.Val1955Met | missense_variant                               | isoleucyl-tRNA synthetase, putative                                 |
| TGME49_277030 | p.Pro1757Ser | missense_variant                               | isoleucyl-tRNA synthetase, putative                                 |
| TGME49_277030 | p.Gly1258Val | missense_variant                               | isoleucyl-tRNA synthetase, putative                                 |
| TGME49_277030 | p.Lys1152Thr | missense_variant                               | isoleucyl-tRNA synthetase, putative                                 |
| TGME49_277030 | p.Ala887Thr  | missense_variant                               | isoleucyl-tRNA synthetase, putative                                 |
| TGME49_277030 | p.Pro850Arg  | missense_variant                               | isoleucyl-tRNA synthetase, putative                                 |
| TGME49_277030 | p.His794Arg  | missense_variant                               | isoleucyl-tRNA synthetase, putative                                 |
| TGME49_277030 | p.Lys690Arg  | missense_variant                               | isoleucyl-tRNA synthetase, putative                                 |
| TGME49_277030 | c.-992T>G    | 5_prime_UTR_premature_start_codon_gain_variant | isoleucyl-tRNA synthetase, putative                                 |
| TGME49_224080 | p.Ser142Pro  | missense_variant                               | Kazal-type serine protease inhibitor domain-containing protein      |
| TGME49_224080 | p.Leu143Pro  | missense_variant                               | Kazal-type serine protease inhibitor domain-containing protein      |
| TGME49_224080 | p.Ala434Gly  | missense_variant                               | Kazal-type serine protease inhibitor domain-containing protein      |
| TGME49_224080 | p.Phe601Leu  | missense_variant                               | Kazal-type serine protease inhibitor domain-containing protein      |
| TGME49_224080 | p.Leu854Phe  | missense_variant                               | Kazal-type serine protease inhibitor domain-containing protein      |
| TGME49_224080 | p.Leu854Arg  | missense_variant                               | Kazal-type serine protease inhibitor domain-containing protein      |
| TGME49_224080 | p.Gly906Glu  | missense_variant                               | Kazal-type serine protease inhibitor domain-containing protein      |
| TGME49_224080 | p.Lys907Arg  | missense_variant                               | Kazal-type serine protease inhibitor domain-containing protein      |
| TGME49_224080 | p.Ala1162Ser | missense_variant                               | Kazal-type serine protease inhibitor domain-containing protein      |
| TGME49_224080 | p.Leu1233Phe | missense_variant                               | Kazal-type serine protease inhibitor domain-containing protein      |
| TGME49_224080 | p.Ala1311Ser | missense_variant                               | Kazal-type serine protease inhibitor domain-containing protein      |
| TGME49_224080 | p.Pro1314Ser | missense_variant                               | Kazal-type serine protease inhibitor domain-containing protein      |
| TGME49_224080 | p.Gly1418Val | missense_variant                               | Kazal-type serine protease inhibitor domain-containing protein      |
| TGME49_224080 | p.Pro1428Leu | missense_variant                               | Kazal-type serine protease inhibitor domain-containing protein      |
| TGME49_224080 | p.Ser1452Phe | missense_variant                               | Kazal-type serine protease inhibitor domain-containing protein      |
| TGME49_224080 | p.Thr1593Ala | missense_variant                               | Kazal-type serine protease inhibitor domain-containing protein      |
| TGME49_224080 | p.Ser1703Ala | missense_variant                               | Kazal-type serine protease inhibitor domain-containing protein      |
| TGME49_224080 | p.Asp1756Glu | missense_variant                               | Kazal-type serine protease inhibitor domain-containing protein      |
| TGME49_224080 | p.Pro1757Arg | missense_variant                               | Kazal-type serine protease inhibitor domain-containing protein      |
| TGME49_224080 | p.Leu1828Pro | missense_variant                               | Kazal-type serine protease inhibitor domain-containing protein      |
| TGME49_224080 | p.Gln1934Glu | missense_variant                               | Kazal-type serine protease inhibitor domain-containing protein      |
| TGME49_224080 | p.Gly1953Asp | missense_variant                               | Kazal-type serine protease inhibitor domain-containing protein      |
| TGME49_224080 | p.Thr1963Lys | missense_variant                               | Kazal-type serine protease inhibitor domain-containing protein      |
| TGME49_224080 | p.Lys1999Arg | missense_variant                               | Kazal-type serine protease inhibitor domain-containing protein      |
| TGME49_234490 | p.Glu875Gly  | missense_variant                               | kelch repeat-containing protein                                     |
| TGME49_250880 | p.Gly403Ala  | missense_variant                               | kinase, pfkB family protein                                         |
| TGME49_250880 | p.Ala367Val  | missense_variant                               | kinase, pfkB family protein                                         |
| TGME49_297110 | p.Asn1259Ser | missense_variant                               | kinesin motor domain-containing protein                             |
| TGME49_297110 | p.His1112Arg | missense_variant                               | kinesin motor domain-containing protein                             |
| TGME49_297110 | p.Gly377Ala  | missense_variant                               | kinesin motor domain-containing protein                             |
| TGME49_297110 | c.-162C>T    | 5_prime_UTR_premature_start_codon_gain_variant | kinesin motor domain-containing protein                             |
| TGME49_319710 | p.Ala299Ser  | missense_variant                               | kinesin motor domain-containing protein                             |
| TGME49_319710 | p.Ala360Thr  | missense_variant                               | kinesin motor domain-containing protein                             |
| TGME49_319710 | p.Thr535Ser  | missense_variant                               | kinesin motor domain-containing protein                             |
| TGME49_319710 | p.Ala657Thr  | missense_variant                               | kinesin motor domain-containing protein                             |
| TGME49_319710 | p.Pro812Arg  | missense_variant                               | kinesin motor domain-containing protein                             |
| TGME49_319710 | p.Ser1016Gly | missense_variant                               | kinesin motor domain-containing protein                             |
| TGME49_319710 | p.Ala1047Ser | missense_variant                               | kinesin motor domain-containing protein                             |
| TGME49_319710 | p.Ser1081Ala | missense_variant                               | kinesin motor domain-containing protein                             |
| TGME49_224880 | p.Val1562Ala | missense_variant                               | kinesin motor domain-containing protein                             |
| TGME49_224880 | p.Lys1316Gln | missense_variant                               | kinesin motor domain-containing protein                             |
| TGME49_224880 | p.Thr1177Ile | missense_variant                               | kinesin motor domain-containing protein                             |
| TGME49_224880 | p.Ile901Val  | missense_variant                               | kinesin motor domain-containing protein                             |
| TGME49_224880 | p.Asp63Glu   | missense_variant                               | kinesin motor domain-containing protein                             |
| TGME49_249020 | p.Ala813Val  | missense_variant                               | kinesin motor domain-containing protein                             |
| TGME49_249020 | p.Glu1109Asp | missense_variant                               | kinesin motor domain-containing protein                             |
| TGME49_249020 | p.Gly1213Glu | missense_variant                               | kinesin motor domain-containing protein                             |
| TGME49_211910 | p.Trp696Arg  | missense_variant                               | kinesin-related protein 3A, putative                                |
| TGME49_211910 | p.Val353Ala  | missense_variant                               | kinesin-related protein 3A, putative                                |
| TGME49_323000 | p.Arg18Leu   | missense_variant                               | KRUF family protein                                                 |
| TGME49_250955 | p.Ser143Ala  | missense_variant                               | KRUF family protein                                                 |
| TGME49_252190 | p.Gly460Asp  | missense_variant                               | KRUF family protein                                                 |
| TGME49_251170 | p.Val215Gly  | missense_variant                               | KRUF family protein                                                 |
| TGME49_251170 | p.Glu211Gly  | missense_variant                               | KRUF family protein                                                 |
| TGME49_251180 | p.Leu258Val  | missense_variant                               | KRUF family protein                                                 |
| TGME49_251180 | p.Asn215His  | missense_variant                               | KRUF family protein                                                 |
| TGME49_251180 | c.-2554C>T   | 5_prime_UTR_premature_start_codon_gain_variant | KRUF family protein                                                 |

|               |              |                                                |                                                 |
|---------------|--------------|------------------------------------------------|-------------------------------------------------|
| TGME49_251180 | c.-3271T>C   | 5_prime_UTR_premature_start_codon_gain_variant | KRUF family protein                             |
| TGME49_222660 | c.4792-7T>C  | splice_region_variant                          | leucine rich repeat-containing protein          |
| TGME49_211430 | p.Ser25Asn   | missense_variant                               | leucine rich repeat-containing protein          |
| TGME49_211430 | p.Arg209Lys  | missense_variant                               | leucine rich repeat-containing protein          |
| TGME49_211430 | p.Ser578Gly  | missense_variant                               | leucine rich repeat-containing protein          |
| TGME49_239110 | p.Thr209Ile  | missense_variant                               | leucine rich repeat-containing protein          |
| TGME49_248240 | p.Glu61Lys   | missense_variant                               | leucine rich repeat-containing protein          |
| TGME49_248240 | p.Gly94Asp   | missense_variant                               | leucine rich repeat-containing protein          |
| TGME49_248240 | p.Arg168Lys  | missense_variant                               | leucine rich repeat-containing protein          |
| TGME49_248240 | p.Pro525Ser  | missense_variant                               | leucine rich repeat-containing protein          |
| TGME49_248240 | p.Pro644Ser  | missense_variant                               | leucine rich repeat-containing protein          |
| TGME49_248240 | p.Ala785Pro  | missense_variant                               | leucine rich repeat-containing protein          |
| TGME49_248240 | p.Val957Leu  | missense_variant                               | leucine rich repeat-containing protein          |
| TGME49_248240 | p.Asp1159His | missense_variant                               | leucine rich repeat-containing protein          |
| TGME49_248240 | p.Gln1238Leu | missense_variant                               | leucine rich repeat-containing protein          |
| TGME49_248970 | p.Arg319Gly  | missense_variant                               | leucine rich repeat-containing protein          |
| TGME49_249980 | p.Met156Ile  | missense_variant                               | leucine rich repeat-containing protein          |
| TGME49_251940 | p.Ala115Thr  | missense_variant                               | leucine rich repeat-containing protein          |
| TGME49_254330 | p.Asp1131Tyr | missense_variant                               | lipase                                          |
| TGME49_254330 | p.Gly930Ser  | missense_variant                               | lipase                                          |
| TGME49_254330 | p.Gly588Ser  | missense_variant                               | lipase                                          |
| TGME49_254330 | p.Val400Ala  | missense_variant                               | lipase                                          |
| TGME49_277950 | p.Asn139Asp  | missense_variant                               | lipase                                          |
| TGME49_277950 | p.Pro287Ser  | missense_variant                               | lipase                                          |
| TGME49_277950 | p.Phe489Val  | missense_variant                               | lipase                                          |
| TGME49_222200 | p.Ser120Thr  | missense_variant                               | LMBR1 family region protein, putative           |
| TGME49_222200 | c.773+6C>T   | splice_region_variant                          | LMBR1 family region protein, putative           |
| TGME49_300280 | c.64-8G>T    | splice_region_variant                          | LSM domain-containing protein                   |
| TGME49_211870 | p.Thr64Ile   | missense_variant                               | LSU ribosomal protein L18P, putative            |
| TGME49_211870 | c.1369+7A>G  | splice_region_variant                          | LSU ribosomal protein L18P, putative            |
| TGME49_254400 | c.-1205C>T   | 5_prime_UTR_premature_start_codon_gain_variant | LSU ribosomal protein L2P, putative             |
| TGME49_254400 | c.-393C>T    | 5_prime_UTR_premature_start_codon_gain_variant | LSU ribosomal protein L2P, putative             |
| TGME49_254400 | c.-321C>G    | 5_prime_UTR_premature_start_codon_gain_variant | LSU ribosomal protein L2P, putative             |
| TGME49_240250 | p.Glu481Asp  | missense_variant                               | macro domain-containing protein                 |
| TGME49_240250 | p.Ser638Cys  | missense_variant                               | macro domain-containing protein                 |
| TGME49_240250 | p.Glu771Asp  | missense_variant                               | macro domain-containing protein                 |
| TGME49_240250 | p.Lys812Arg  | missense_variant                               | macro domain-containing protein                 |
| TGME49_315590 | p.Arg206Ser  | missense_variant                               | macro domain-containing protein                 |
| TGME49_318430 | p.Leu103Trp  | missense_variant                               | malate dehydrogenase MDH                        |
| TGME49_253120 | p.Val597Asp  | missense_variant                               | mandelonitrile lyase, putative                  |
| TGME49_249702 | p.Ala102Val  | missense_variant                               | MC family transporter, putative                 |
| TGME49_249702 | c.628-7T>C   | splice_region_variant                          | MC family transporter, putative                 |
| TGME49_246030 | p.Val147Ala  | missense_variant                               | mediator complex subunit MED17                  |
| TGME49_246030 | p.Ser265Gly  | missense_variant                               | mediator complex subunit MED17                  |
| TGME49_246030 | p.Gly653Asp  | missense_variant                               | mediator complex subunit MED17                  |
| TGME49_246030 | p.Pro783Gln  | missense_variant                               | mediator complex subunit MED17                  |
| TGME49_223580 | p.Cys79Phe   | missense_variant                               | mediator complex subunit MED4                   |
| TGME49_223580 | c.747-6G>T   | splice_region_variant                          | mediator complex subunit MED4                   |
| TGME49_223580 | p.Gln331Arg  | missense_variant                               | mediator complex subunit MED4                   |
| TGME49_223580 | p.Arg336Cys  | missense_variant                               | mediator complex subunit MED4                   |
| TGME49_319550 | p.Val24Ile   | missense_variant                               | membrane protein C17G8.08c, putative            |
| TGME49_319550 | p.Ile126Val  | missense_variant                               | membrane protein C17G8.08c, putative            |
| TGME49_218740 | c.-272A>T    | 5_prime_UTR_premature_start_codon_gain_variant | membrane protein, putative                      |
| TGME49_254080 | p.Arg109Ser  | missense_variant                               | metal cation transporter, ZIP family protein    |
| TGME49_211330 | p.Glu35Gly   | missense_variant                               | methionine aminopeptidase                       |
| TGME49_211330 | p.Thr110Ala  | missense_variant                               | methionine aminopeptidase                       |
| TGME49_211330 | p.Gly216Glu  | missense_variant                               | methionine aminopeptidase                       |
| TGME49_211330 | p.Gly259Arg  | missense_variant                               | methionine aminopeptidase                       |
| TGME49_211330 | p.Ala303Ser  | missense_variant                               | methionine aminopeptidase                       |
| TGME49_211330 | p.Thr647Met  | missense_variant                               | methionine aminopeptidase                       |
| TGME49_301000 | c.-620C>T    | 5_prime_UTR_premature_start_codon_gain_variant | methyltransferase                               |
| TGME49_247590 | p.Gly46Arg   | missense_variant                               | methyltransferase domain-containing protein     |
| TGME49_247590 | p.Gly172Val  | missense_variant                               | methyltransferase domain-containing protein     |
| TGME49_247590 | p.Ala328Pro  | missense_variant                               | methyltransferase domain-containing protein     |
| TGME49_247590 | p.Cys623Trp  | missense_variant                               | methyltransferase domain-containing protein     |
| TGME49_247590 | p.Glu662Gly  | missense_variant                               | methyltransferase domain-containing protein     |
| TGME49_247920 | p.Thr276Ile  | missense_variant                               | methyltransferase domain-containing protein     |
| TGME49_247920 | p.Ala248Thr  | missense_variant                               | methyltransferase domain-containing protein     |
| TGME49_248960 | p.Thr50Ile   | missense_variant                               | methyltransferase domain-containing protein     |
| TGME49_217350 | c.1900-4T>G  | splice_region_variant                          | methyltransferase MTA70, putative               |
| TGME49_214590 | c.-152C>T    | 5_prime_UTR_premature_start_codon_gain_variant | micro-fibrillar-associated protein 1            |
| TGME49_214590 | c.-61C>T     | 5_prime_UTR_premature_start_codon_gain_variant | micro-fibrillar-associated protein 1            |
| TGME49_250710 | p.Val32Ala   | missense_variant                               | microneme protein MIC10                         |
| TGME49_247195 | p.Asn1022His | missense_variant                               | microneme protein MIC15                         |
| TGME49_319560 | c.-1365A>C   | 5_prime_UTR_premature_start_codon_gain_variant | microneme protein MIC3                          |
| TGME49_277080 | p.Lys179Asn  | missense_variant                               | microneme protein MIC5                          |
| TGME49_218520 | c.-2776C>T   | 5_prime_UTR_premature_start_codon_gain_variant | microneme protein MIC6                          |
| TGME49_254940 | p.Pro405Ser  | missense_variant                               | MIF4G domain-containing protein                 |
| TGME49_254940 | p.Gln916Lys  | missense_variant                               | MIF4G domain-containing protein                 |
| TGME49_254940 | p.Glu2727Gln | missense_variant                               | MIF4G domain-containing protein                 |
| TGME49_254940 | p.Ser3093Gly | missense_variant                               | MIF4G domain-containing protein                 |
| TGME49_246040 | p.Glu377Ala  | missense_variant                               | MIF4G domain-containing protein                 |
| TGME49_246040 | c.2397+8G>A  | splice_region_variant                          | MIF4G domain-containing protein                 |
| TGME49_246040 | p.Gly1040Ser | missense_variant                               | MIF4G domain-containing protein                 |
| TGME49_245470 | c.-649C>G    | 5_prime_UTR_premature_start_codon_gain_variant | mitotic checkpoint protein, BUB3 family protein |

|               |              |                                                |                                                     |
|---------------|--------------|------------------------------------------------|-----------------------------------------------------|
| TGME49_278640 | p.Leu1658Pro | missense_variant                               | MIZ/SP-RING zinc finger domain-containing protein   |
| TGME49_278640 | p.Leu1527Pro | missense_variant                               | MIZ/SP-RING zinc finger domain-containing protein   |
| TGME49_278640 | p.Pro1433Ser | missense_variant                               | MIZ/SP-RING zinc finger domain-containing protein   |
| TGME49_278640 | p.Arg889Pro  | missense_variant                               | MIZ/SP-RING zinc finger domain-containing protein   |
| TGME49_278640 | c.-1122C>T   | 5_prime_UTR_premature_start_codon_gain_variant | MIZ/SP-RING zinc finger domain-containing protein   |
| TGME49_278640 | c.-1997A>T   | 5_prime_UTR_premature_start_codon_gain_variant | MIZ/SP-RING zinc finger domain-containing protein   |
| TGME49_223060 | p.Glu23Lys   | missense_variant                               | MORN repeat-containing protein                      |
| TGME49_223060 | p.Val465Met  | missense_variant                               | MORN repeat-containing protein                      |
| TGME49_223060 | p.Glu702Lys  | missense_variant                               | MORN repeat-containing protein                      |
| TGME49_223060 | p.Ser1061Thr | missense_variant                               | MORN repeat-containing protein                      |
| TGME49_223060 | p.Thr1162Ile | missense_variant                               | MORN repeat-containing protein                      |
| TGME49_223060 | p.Glu1164Val | missense_variant                               | MORN repeat-containing protein                      |
| TGME49_223060 | p.Leu1318Phe | missense_variant                               | MORN repeat-containing protein                      |
| TGME49_223060 | p.Ala1366Glu | missense_variant                               | MORN repeat-containing protein                      |
| TGME49_223060 | p.Thr1424Ala | missense_variant                               | MORN repeat-containing protein                      |
| TGME49_223060 | p.Ala1437Val | missense_variant                               | MORN repeat-containing protein                      |
| TGME49_223060 | p.Ser1443Ala | missense_variant                               | MORN repeat-containing protein                      |
| TGME49_223060 | p.Arg1447Ser | missense_variant                               | MORN repeat-containing protein                      |
| TGME49_223060 | p.Ile1516Val | missense_variant                               | MORN repeat-containing protein                      |
| TGME49_223060 | p.Ile1516Met | missense_variant                               | MORN repeat-containing protein                      |
| TGME49_223060 | p.Ala1570Thr | missense_variant                               | MORN repeat-containing protein                      |
| TGME49_223060 | p.Pro1586Arg | missense_variant                               | MORN repeat-containing protein                      |
| TGME49_223060 | p.Phe1914Leu | missense_variant                               | MORN repeat-containing protein                      |
| TGME49_223060 | c.7534-3T>C  | splice_region_variant                          | MORN repeat-containing protein                      |
| TGME49_297150 | p.Asp416Gly  | missense_variant                               | MORN repeat-containing protein                      |
| TGME49_297150 | p.Pro399Ser  | missense_variant                               | MORN repeat-containing protein                      |
| TGME49_297150 | p.Ser293Gly  | missense_variant                               | MORN repeat-containing protein                      |
| TGME49_297150 | c.-18C>T     | 5_prime_UTR_premature_start_codon_gain_variant | MORN repeat-containing protein                      |
| TGME49_297150 | c.-2015T>C   | 5_prime_UTR_premature_start_codon_gain_variant | MORN repeat-containing protein                      |
| TGME49_297150 | c.-2478C>T   | 5_prime_UTR_premature_start_codon_gain_variant | MORN repeat-containing protein                      |
| TGME49_319880 | p.Val146Ala  | missense_variant                               | MORN repeat-containing protein                      |
| TGME49_319880 | p.Arg229Lys  | missense_variant                               | MORN repeat-containing protein                      |
| TGME49_319880 | p.Arg246Gly  | missense_variant                               | MORN repeat-containing protein                      |
| TGME49_319880 | p.Gly300Asp  | missense_variant                               | MORN repeat-containing protein                      |
| TGME49_319880 | p.Val464Leu  | missense_variant                               | MORN repeat-containing protein                      |
| TGME49_319880 | p.Arg590Cys  | missense_variant                               | MORN repeat-containing protein                      |
| TGME49_319880 | p.Arg593Ser  | missense_variant                               | MORN repeat-containing protein                      |
| TGME49_319880 | c.2173+6A>G  | splice_region_variant                          | MORN repeat-containing protein                      |
| TGME49_319880 | p.Asn894Lys  | missense_variant                               | MORN repeat-containing protein                      |
| TGME49_319880 | c.3925-8T>C  | splice_region_variant                          | MORN repeat-containing protein                      |
| TGME49_319880 | p.Pro1503Ser | missense_variant                               | MORN repeat-containing protein                      |
| TGME49_319880 | p.Pro1504Ser | missense_variant                               | MORN repeat-containing protein                      |
| TGME49_235515 | p.Pro809Ser  | missense_variant                               | MORN repeat-containing protein                      |
| TGME49_235515 | p.Arg565Gln  | missense_variant                               | MORN repeat-containing protein                      |
| TGME49_235515 | c.944-6T>G   | splice_region_variant                          | MORN repeat-containing protein                      |
| TGME49_235515 | p.Val237Ala  | missense_variant                               | MORN repeat-containing protein                      |
| TGME49_215510 | c.2619+8G>A  | splice_region_variant                          | MraW methylase family protein                       |
| TGME49_215510 | p.Phe619Val  | missense_variant                               | MraW methylase family protein                       |
| TGME49_215510 | p.Gly518Ser  | missense_variant                               | MraW methylase family protein                       |
| TGME49_215510 | p.Cys349Arg  | missense_variant                               | MraW methylase family protein                       |
| TGME49_215510 | p.Val348Ala  | missense_variant                               | MraW methylase family protein                       |
| TGME49_215510 | p.Gly127Arg  | missense_variant                               | MraW methylase family protein                       |
| TGME49_278060 | c.1132-4G>A  | splice_region_variant                          | Mre11 DNA-binding domain-containing protein         |
| TGME49_224650 | p.Val541Ala  | missense_variant                               | mRNA capping enzyme, beta chain protein             |
| TGME49_224650 | p.Phe19Ile   | missense_variant                               | mRNA capping enzyme, beta chain protein             |
| TGME49_224650 | c.-390C>G    | 5_prime_UTR_premature_start_codon_gain_variant | mRNA capping enzyme, beta chain protein             |
| TGME49_221190 | p.Pro111Ala  | missense_variant                               | mRNA cleavage factor family protein, putative       |
| TGME49_318590 | p.Thr519Lys  | missense_variant                               | MRP family domain-containing protein                |
| TGME49_318590 | p.Asp461His  | missense_variant                               | MRP family domain-containing protein                |
| TGME49_318590 | p.Gly36Ala   | missense_variant                               | MRP family domain-containing protein                |
| TGME49_300250 | p.Pro38Thr   | missense_variant                               | MtN3/saliva family protein                          |
| TGME49_300250 | p.Phe165Ser  | missense_variant                               | MtN3/saliva family protein                          |
| TGME49_300250 | p.Val599Gly  | missense_variant                               | MtN3/saliva family protein                          |
| TGME49_218840 | p.Ala27Thr   | missense_variant                               | mutS domain protein                                 |
| TGME49_218840 | p.Leu73Pro   | missense_variant                               | mutS domain protein                                 |
| TGME49_218840 | p.Gly109Ser  | missense_variant                               | mutS domain protein                                 |
| TGME49_218840 | p.Trp129Arg  | missense_variant                               | mutS domain protein                                 |
| TGME49_218840 | p.Ser201Ala  | missense_variant                               | mutS domain protein                                 |
| TGME49_218840 | p.Pro635Ser  | missense_variant                               | mutS domain protein                                 |
| TGME49_218840 | p.Val726Ile  | missense_variant                               | mutS domain protein                                 |
| TGME49_218840 | p.Pro785Ser  | missense_variant                               | mutS domain protein                                 |
| TGME49_218840 | p.Glu1085Ala | missense_variant                               | mutS domain protein                                 |
| TGME49_218840 | c.*352T>C    | splice_region_variant                          | mutS domain protein                                 |
| TGME49_235470 | c.-453C>A    | 5_prime_UTR_premature_start_codon_gain_variant | myosin A                                            |
| TGME49_239560 | p.Val815Met  | missense_variant                               | myosin E                                            |
| TGME49_278870 | c.2934-6G>A  | splice_region_variant                          | myosin F                                            |
| TGME49_254850 | p.Asp23Asn   | missense_variant                               | myosin heavy chain, putative                        |
| TGME49_254850 | p.Glu47Lys   | missense_variant                               | myosin heavy chain, putative                        |
| TGME49_297470 | c.-834C>T    | 5_prime_UTR_premature_start_codon_gain_variant | myosin light chain 2, putative                      |
| TGME49_278518 | p.Pro830Thr  | missense_variant                               | N-acetylgalactosaminyl transferase                  |
| TGME49_318510 | c.1110+6C>T  | splice_region_variant                          | N-ethylmaleimide-sensitive fusion protein, putative |
| TGME49_246080 | p.Arg606Cys  | missense_variant                               | NAD dependent epimerase/dehydratase family protein  |
| TGME49_246080 | p.Ala466Val  | missense_variant                               | NAD dependent epimerase/dehydratase family protein  |
| TGME49_301210 | p.Ser25Arg   | missense_variant                               | NAD(P) transhydrogenase subunit beta, putative      |
| TGME49_301210 | p.Thr448Ala  | missense_variant                               | NAD(P) transhydrogenase subunit beta, putative      |

|               |              |                                                |                                                                    |
|---------------|--------------|------------------------------------------------|--------------------------------------------------------------------|
| TGME49_219130 | c.1578+7G>A  | splice_region_variant                          | NADPH-glutathione reductase                                        |
| TGME49_219130 | p.Glu165Asp  | missense_variant                               | NADPH-glutathione reductase                                        |
| TGME49_219130 | p.His51Asn   | missense_variant                               | NADPH-glutathione reductase                                        |
| TGME49_319700 | c.89+6T>G    | splice_region_variant                          | NEK kinase                                                         |
| TGME49_319700 | p.Tyr289Cys  | missense_variant                               | NEK kinase                                                         |
| TGME49_218400 | p.Ala2642Val | missense_variant                               | NEK kinase                                                         |
| TGME49_218400 | p.Thr2494Ala | missense_variant                               | NEK kinase                                                         |
| TGME49_218400 | p.Val2479Ala | missense_variant                               | NEK kinase                                                         |
| TGME49_218400 | p.Pro2205Ser | missense_variant                               | NEK kinase                                                         |
| TGME49_218400 | p.Glu1830Gly | missense_variant                               | NEK kinase                                                         |
| TGME49_218400 | p.Glu1778Gly | missense_variant                               | NEK kinase                                                         |
| TGME49_218400 | p.Ser1731Arg | missense_variant                               | NEK kinase                                                         |
| TGME49_218400 | p.Arg1631Lys | missense_variant                               | NEK kinase                                                         |
| TGME49_218400 | p.Ser1331Pro | missense_variant                               | NEK kinase                                                         |
| TGME49_218400 | p.Thr1158Ala | missense_variant                               | NEK kinase                                                         |
| TGME49_218400 | p.Val410Ala  | missense_variant                               | NEK kinase                                                         |
| TGME49_221922 | p.Gln438His  | missense_variant                               | NifU family domain-containing protein                              |
| TGME49_221922 | p.Glu474Asp  | missense_variant                               | NifU family domain-containing protein                              |
| TGME49_218570 | p.Ala29Pro   | missense_variant                               | Nin one binding (NOB1) Zn-ribbon family protein                    |
| TGME49_218570 | p.Pro8Ala    | missense_variant                               | Nin one binding (NOB1) Zn-ribbon family protein                    |
| TGME49_218570 | c.-190G>T    | 5_prime_UTR_premature_start_codon_gain_variant | Nin one binding (NOB1) Zn-ribbon family protein                    |
| TGME49_249770 | p.His148Asp  | missense_variant                               | Nmda1 protein                                                      |
| TGME49_222340 | p.Gly165Arg  | missense_variant                               | NOL1/NOP2/sun family protein                                       |
| TGME49_222340 | p.Thr170Ala  | missense_variant                               | NOL1/NOP2/sun family protein                                       |
| TGME49_222340 | p.Ser230Ala  | missense_variant                               | NOL1/NOP2/sun family protein                                       |
| TGME49_222340 | p.Cys341Gly  | missense_variant                               | NOL1/NOP2/sun family protein                                       |
| TGME49_222340 | p.Pro384Ser  | missense_variant                               | NOL1/NOP2/sun family protein                                       |
| TGME49_222340 | p.Leu599Ser  | missense_variant                               | NOL1/NOP2/sun family protein                                       |
| TGME49_219190 | c.-63C>T     | 5_prime_UTR_premature_start_codon_gain_variant | nuclear movement protein domain containing protein                 |
| TGME49_238050 | p.Val915Met  | missense_variant                               | nuclease and tudor domain-containing protein                       |
| TGME49_300230 | c.-146C>G    | 5_prime_UTR_premature_start_codon_gain_variant | nuclease, putative                                                 |
| TGME49_248677 | p.Ala144Thr  | missense_variant                               | nucleic acid binding protein, putative                             |
| TGME49_247470 | p.Asp240Ala  | missense_variant                               | nucleolar protein, putative                                        |
| TGME49_248980 | c.-290C>G    | 5_prime_UTR_premature_start_codon_gain_variant | NudC family protein                                                |
| TGME49_248980 | p.Ala110Ser  | missense_variant                               | NudC family protein                                                |
| TGME49_248980 | p.Ser111Pro  | missense_variant                               | NudC family protein                                                |
| TGME49_248980 | p.Val131Ala  | missense_variant                               | NudC family protein                                                |
| TGME49_278910 | p.Arg162Gly  | missense_variant                               | O-acetylserine (thiol) lyase 2, putative                           |
| TGME49_210950 | p.Ala674Val  | missense_variant                               | oocyst wall protein                                                |
| TGME49_210950 | p.Gly10Asp   | missense_variant                               | oocyst wall protein                                                |
| TGME49_210950 | p.Leu4Arg    | missense_variant                               | oocyst wall protein                                                |
| TGME49_254050 | c.-632T>G    | 5_prime_UTR_premature_start_codon_gain_variant | optic atrophy 3 protein (opa3) protein                             |
| TGME49_254050 | c.-817C>T    | 5_prime_UTR_premature_start_codon_gain_variant | optic atrophy 3 protein (opa3) protein                             |
| TGME49_254050 | c.-1025A>G   | 5_prime_UTR_premature_start_codon_gain_variant | optic atrophy 3 protein (opa3) protein                             |
| TGME49_302005 | p.Gly22Glu   | missense_variant                               | ORF F                                                              |
| TGME49_245570 | p.His269Asn  | missense_variant                               | origin recognition complex subunit 2 protein                       |
| TGME49_245570 | p.Pro205Ser  | missense_variant                               | origin recognition complex subunit 2 protein                       |
| TGME49_245570 | p.Leu68Arg   | missense_variant                               | origin recognition complex subunit 2 protein                       |
| TGME49_277990 | p.Val243Ala  | missense_variant                               | OTU family cysteine protease                                       |
| TGME49_277990 | p.Glu118Ala  | missense_variant                               | OTU family cysteine protease                                       |
| TGME49_277990 | p.Glu118Lys  | missense_variant                               | OTU family cysteine protease                                       |
| TGME49_277990 | c.-609G>C    | 5_prime_UTR_premature_start_codon_gain_variant | OTU family cysteine protease                                       |
| TGME49_221270 | p.Asp104Glu  | missense_variant                               | oxidoreductase, 2OG-Fe(II) oxygenase family protein                |
| TGME49_221270 | p.Pro70Leu   | missense_variant                               | oxidoreductase, 2OG-Fe(II) oxygenase family protein                |
| TGME49_253960 | p.Glu322Lys  | missense_variant                               | oxidoreductase, short chain dehydrogenase/reductase family protein |
| TGME49_253960 | p.His80Asp   | missense_variant&splice_region_variant         | oxidoreductase, short chain dehydrogenase/reductase family protein |
| TGME49_253960 | p.Gly20Arg   | missense_variant                               | oxidoreductase, short chain dehydrogenase/reductase family protein |
| TGME49_318460 | c.2088+6G>C  | splice_region_variant                          | P-type ATPase of unknown pump specificity (type V) protein         |
| TGME49_252640 | p.Glu487Asp  | missense_variant                               | P-type ATPase PMA1                                                 |
| TGME49_278660 | p.Glu1181Gln | missense_variant                               | P-type ATPase4, putative                                           |
| TGME49_235183 | p.Tyr1387Phe | missense_variant                               | PAN domain-containing protein                                      |
| TGME49_235200 | p.Ala1921Thr | missense_variant                               | PAN domain-containing protein                                      |
| TGME49_249150 | p.Lys280Asn  | missense_variant                               | PAN domain-containing protein                                      |
| TGME49_249150 | p.Ile653Met  | missense_variant                               | PAN domain-containing protein                                      |
| TGME49_249150 | p.Glu967Lys  | missense_variant                               | PAN domain-containing protein                                      |
| TGME49_249150 | p.Ile997Thr  | missense_variant                               | PAN domain-containing protein                                      |
| TGME49_249150 | p.Val1030Leu | missense_variant                               | PAN domain-containing protein                                      |
| TGME49_235478 | p.Ala1517Thr | missense_variant                               | pantothenate kinase                                                |
| TGME49_235478 | p.Leu1480His | missense_variant                               | pantothenate kinase                                                |
| TGME49_235478 | p.Glu975Gly  | missense_variant                               | pantothenate kinase                                                |
| TGME49_247360 | c.-276G>T    | 5_prime_UTR_premature_start_codon_gain_variant | PAP2 superfamily protein                                           |
| TGME49_253900 | p.His59Gln   | missense_variant                               | parasite porphobilinogen synthase PBGS                             |
| TGME49_249710 | c.-999G>A    | 5_prime_UTR_premature_start_codon_gain_variant | Parkinson disease 7 domain containing 1 family protein             |
| TGME49_249710 | p.His387Arg  | missense_variant                               | Parkinson disease 7 domain containing 1 family protein             |
| TGME49_249710 | p.Gly544Arg  | missense_variant                               | Parkinson disease 7 domain containing 1 family protein             |
| TGME49_249710 | p.Val577Ala  | missense_variant                               | Parkinson disease 7 domain containing 1 family protein             |
| TGME49_236220 | p.Thr337Ala  | missense_variant                               | PCI domain-containing protein                                      |
| TGME49_254450 | p.Ala332Ser  | missense_variant                               | Pelota, putative                                                   |
| TGME49_252210 | c.-281C>G    | 5_prime_UTR_premature_start_codon_gain_variant | pentatricopeptide repeat domain-containing protein                 |
| TGME49_250760 | p.Thr421Ala  | missense_variant                               | pentatricopeptide repeat domain-containing protein                 |
| TGME49_250760 | p.Leu449Val  | missense_variant                               | pentatricopeptide repeat domain-containing protein                 |
| TGME49_250760 | p.Asn584Lys  | missense_variant                               | pentatricopeptide repeat domain-containing protein                 |
| TGME49_250760 | p.Ser615Tyr  | missense_variant                               | pentatricopeptide repeat domain-containing protein                 |
| TGME49_250760 | p.Gly917Arg  | missense_variant                               | pentatricopeptide repeat domain-containing protein                 |
| TGME49_250760 | p.Lys1064Arg | missense_variant                               | pentatricopeptide repeat domain-containing protein                 |

|               |              |                                                |                                                                          |
|---------------|--------------|------------------------------------------------|--------------------------------------------------------------------------|
| TGME49_250760 | p.Ala1899Val | missense_variant                               | pentatricopeptide repeat domain-containing protein                       |
| TGME49_252440 | p.Ile490Ser  | missense_variant                               | peptidase c13 family protein                                             |
| TGME49_253890 | p.Pro909Ser  | missense_variant                               | peptidase M16 inactive domain-containing protein                         |
| TGME49_253890 | p.Asn829Thr  | missense_variant                               | peptidase M16 inactive domain-containing protein                         |
| TGME49_253890 | p.Lys818Glu  | missense_variant                               | peptidase M16 inactive domain-containing protein                         |
| TGME49_253890 | p.Gln749His  | missense_variant                               | peptidase M16 inactive domain-containing protein                         |
| TGME49_253890 | p.Pro401Ser  | missense_variant                               | peptidase M16 inactive domain-containing protein                         |
| TGME49_253890 | p.Phe86Leu   | missense_variant                               | peptidase M16 inactive domain-containing protein                         |
| TGME49_253890 | p.Arg82Leu   | missense_variant                               | peptidase M16 inactive domain-containing protein                         |
| TGME49_235680 | p.Gly408Arg  | missense_variant                               | peptidase M16 inactive domain-containing protein                         |
| TGME49_235680 | p.Pro355Ser  | missense_variant                               | peptidase M16 inactive domain-containing protein                         |
| TGME49_235680 | p.Glu269Asp  | missense_variant                               | peptidase M16 inactive domain-containing protein                         |
| TGME49_235680 | p.Gly109Glu  | missense_variant                               | peptidase M16 inactive domain-containing protein                         |
| TGME49_235680 | c.-916A>G    | 5_prime_UTR_premature_start_codon_gain_variant | peptidase M16 inactive domain-containing protein                         |
| TGME49_214490 | p.Ser783Phe  | missense_variant                               | peptidase M16 inactive domain-containing protein                         |
| TGME49_318275 | c.-35T>G     | 5_prime_UTR_premature_start_codon_gain_variant | peptidyl-prolyl cis-trans isomerase, FKBP-type domain-containing protein |
| TGME49_238000 | p.Asp47Asn   | missense_variant                               | peptidyl-prolyl isomerase                                                |
| TGME49_219240 | p.Met250Leu  | missense_variant                               | Peptidyl-tRNA hydrolase PTH2 domain-containing protein                   |
| TGME49_219240 | c.-279C>T    | 5_prime_UTR_premature_start_codon_gain_variant | Peptidyl-tRNA hydrolase PTH2 domain-containing protein                   |
| TGME49_219240 | c.-1843G>T   | 5_prime_UTR_premature_start_codon_gain_variant | Peptidyl-tRNA hydrolase PTH2 domain-containing protein                   |
| TGME49_211240 | c.-182C>T    | 5_prime_UTR_premature_start_codon_gain_variant | peptidyl-tRNA hydrolase, putative                                        |
| TGME49_211240 | c.29-7C>T    | splice_region_variant                          | peptidyl-tRNA hydrolase, putative                                        |
| TGME49_248225 | c.1111-8G>T  | splice_region_variant                          | PF2 arrest specific protein 8/11, putative                               |
| TGME49_248225 | c.1111-4G>C  | splice_region_variant                          | PF2 arrest specific protein 8/11, putative                               |
| TGME49_248225 | p.Glu414Asp  | missense_variant                               | PF2 arrest specific protein 8/11, putative                               |
| TGME49_224260 | p.Gly5379Asp | missense_variant                               | PHD-finger domain-containing protein                                     |
| TGME49_224260 | p.Ser4580Gly | missense_variant                               | PHD-finger domain-containing protein                                     |
| TGME49_224260 | p.Pro4205Leu | missense_variant                               | PHD-finger domain-containing protein                                     |
| TGME49_224260 | p.Val3748Gly | missense_variant                               | PHD-finger domain-containing protein                                     |
| TGME49_224260 | p.Val3724Ile | missense_variant                               | PHD-finger domain-containing protein                                     |
| TGME49_224260 | p.Pro3690Gln | missense_variant                               | PHD-finger domain-containing protein                                     |
| TGME49_224260 | p.Lys3651Thr | missense_variant                               | PHD-finger domain-containing protein                                     |
| TGME49_224260 | p.Ala3643Pro | missense_variant                               | PHD-finger domain-containing protein                                     |
| TGME49_224260 | p.Ser3573Leu | missense_variant                               | PHD-finger domain-containing protein                                     |
| TGME49_224260 | p.Lys3515Glu | missense_variant                               | PHD-finger domain-containing protein                                     |
| TGME49_224260 | p.Pro3414Gln | missense_variant                               | PHD-finger domain-containing protein                                     |
| TGME49_224260 | p.Gly3366Asp | missense_variant                               | PHD-finger domain-containing protein                                     |
| TGME49_224260 | p.Ala3345Thr | missense_variant                               | PHD-finger domain-containing protein                                     |
| TGME49_224260 | p.Thr3273Met | missense_variant                               | PHD-finger domain-containing protein                                     |
| TGME49_224260 | p.Asp2222Asn | missense_variant                               | PHD-finger domain-containing protein                                     |
| TGME49_224260 | p.Pro2188Ser | missense_variant                               | PHD-finger domain-containing protein                                     |
| TGME49_224260 | p.Glu2185Gly | missense_variant                               | PHD-finger domain-containing protein                                     |
| TGME49_224260 | p.Glu2161Asp | missense_variant                               | PHD-finger domain-containing protein                                     |
| TGME49_224260 | p.Asp1479Gly | missense_variant                               | PHD-finger domain-containing protein                                     |
| TGME49_224260 | p.Leu1376Arg | missense_variant                               | PHD-finger domain-containing protein                                     |
| TGME49_224260 | p.Gly1352Asp | missense_variant                               | PHD-finger domain-containing protein                                     |
| TGME49_224260 | p.Ala615Thr  | missense_variant                               | PHD-finger domain-containing protein                                     |
| TGME49_224260 | p.Ile148Val  | missense_variant                               | PHD-finger domain-containing protein                                     |
| TGME49_234900 | c.-1337C>T   | 5_prime_UTR_premature_start_codon_gain_variant | PHD-finger domain-containing protein                                     |
| TGME49_234900 | c.-723C>G    | 5_prime_UTR_premature_start_codon_gain_variant | PHD-finger domain-containing protein                                     |
| TGME49_234900 | p.Glu628Ala  | missense_variant                               | PHD-finger domain-containing protein                                     |
| TGME49_234900 | p.Lys693Arg  | missense_variant                               | PHD-finger domain-containing protein                                     |
| TGME49_234900 | p.Arg1089His | missense_variant                               | PHD-finger domain-containing protein                                     |
| TGME49_234900 | p.Val1889Gly | missense_variant                               | PHD-finger domain-containing protein                                     |
| TGME49_234900 | p.Glu2299Asp | missense_variant                               | PHD-finger domain-containing protein                                     |
| TGME49_234900 | p.Ala2306Val | missense_variant                               | PHD-finger domain-containing protein                                     |
| TGME49_234900 | p.Leu2327Val | missense_variant                               | PHD-finger domain-containing protein                                     |
| TGME49_235550 | c.-323G>A    | 5_prime_UTR_premature_start_codon_gain_variant | PHD-finger domain-containing protein                                     |
| TGME49_235550 | p.Val33Ala   | missense_variant                               | PHD-finger domain-containing protein                                     |
| TGME49_235550 | p.Gly145Ser  | missense_variant                               | PHD-finger domain-containing protein                                     |
| TGME49_246100 | c.-502C>T    | 5_prime_UTR_premature_start_codon_gain_variant | phosducin, putative                                                      |
| TGME49_246100 | c.-107T>G    | 5_prime_UTR_premature_start_codon_gain_variant | phosducin, putative                                                      |
| TGME49_278990 | p.Gln30His   | missense_variant                               | phosphate carrier, putative                                              |
| TGME49_240210 | c.-1023T>C   | 5_prime_UTR_premature_start_codon_gain_variant | phosphate transporter family protein, putative                           |
| TGME49_254365 | p.Arg39His   | missense_variant                               | phosphatidate cytidyltransferase                                         |
| TGME49_215700 | p.Val2201Leu | missense_variant                               | phosphatidylinositol 3- and 4-kinase                                     |
| TGME49_215700 | p.Val2190Ile | missense_variant                               | phosphatidylinositol 3- and 4-kinase                                     |
| TGME49_215700 | p.Asn1415Tyr | missense_variant                               | phosphatidylinositol 3- and 4-kinase                                     |
| TGME49_215700 | p.Val1088Leu | missense_variant                               | phosphatidylinositol 3- and 4-kinase                                     |
| TGME49_215700 | p.Ser648Pro  | missense_variant                               | phosphatidylinositol 3- and 4-kinase                                     |
| TGME49_215700 | p.Ala548Thr  | missense_variant                               | phosphatidylinositol 3- and 4-kinase                                     |
| TGME49_215700 | p.Ser487Cys  | missense_variant                               | phosphatidylinositol 3- and 4-kinase                                     |
| TGME49_215700 | p.Ser486Trp  | missense_variant                               | phosphatidylinositol 3- and 4-kinase                                     |
| TGME49_215700 | p.Pro69Ser   | missense_variant                               | phosphatidylinositol 3- and 4-kinase                                     |
| TGME49_299040 | c.-273C>T    | 5_prime_UTR_premature_start_codon_gain_variant | phosphatidylinositol n-acetylglucosaminyltransferase                     |
| TGME49_299040 | c.-684C>A    | 5_prime_UTR_premature_start_codon_gain_variant | phosphatidylinositol n-acetylglucosaminyltransferase                     |
| TGME49_299040 | c.-999T>G    | 5_prime_UTR_premature_start_codon_gain_variant | phosphatidylinositol n-acetylglucosaminyltransferase                     |
| TGME49_245730 | p.Ser187Tyr  | missense_variant                               | phosphatidylinositol 4-phosphate 5-Kinase                                |
| TGME49_245730 | p.Gly195Asp  | missense_variant                               | phosphatidylinositol 4-phosphate 5-Kinase                                |
| TGME49_245730 | p.Ser695Tyr  | missense_variant                               | phosphatidylinositol 4-phosphate 5-Kinase                                |
| TGME49_245730 | p.Pro1652Leu | missense_variant                               | phosphatidylinositol 4-phosphate 5-Kinase                                |
| TGME49_245730 | c.5786+8T>C  | splice_region_variant                          | phosphatidylinositol 4-phosphate 5-Kinase                                |
| TGME49_245730 | p.Asp2081Val | missense_variant                               | phosphatidylinositol 4-phosphate 5-Kinase                                |
| TGME49_214280 | c.-666C>T    | 5_prime_UTR_premature_start_codon_gain_variant | phosphoadenosine phosphosulfate reductase family protein                 |
| TGME49_214280 | p.Ser250Arg  | missense_variant                               | phosphoadenosine phosphosulfate reductase family protein                 |



|               |              |                                                |                                                                      |
|---------------|--------------|------------------------------------------------|----------------------------------------------------------------------|
| TGME49_214280 | p.Ser488Leu  | missense_variant                               | phosphoadenosine phosphosulfate reductase family protein             |
| TGME49_214280 | p.Val504Asp  | missense_variant                               | phosphoadenosine phosphosulfate reductase family protein             |
| TGME49_222020 | p.Phe28Val   | missense_variant                               | phosphoglycerate kinase PGKII                                        |
| TGME49_222020 | p.Val426Ile  | missense_variant                               | phosphoglycerate kinase PGKII                                        |
| TGME49_221460 | c.94-6C>G    | splice_region_variant                          | phosphoglycerate mutase family protein                               |
| TGME49_318190 | c.5461-4G>T  | splice_region_variant                          | phosphoglycerate mutase family protein                               |
| TGME49_318190 | p.Ala1604Thr | missense_variant                               | phosphoglycerate mutase family protein                               |
| TGME49_318190 | p.Ala1389Thr | missense_variant                               | phosphoglycerate mutase family protein                               |
| TGME49_318190 | p.Thr1161Ser | missense_variant                               | phosphoglycerate mutase family protein                               |
| TGME49_318190 | p.Ser920Pro  | missense_variant                               | phosphoglycerate mutase family protein                               |
| TGME49_318190 | p.Leu878Val  | missense_variant                               | phosphoglycerate mutase family protein                               |
| TGME49_318190 | p.Gly701Asp  | missense_variant                               | phosphoglycerate mutase family protein                               |
| TGME49_222952 | p.Arg101Cys  | missense_variant                               | phosphohistidine phosphatase                                         |
| TGME49_248830 | c.-256C>T    | 5_prime_UTR_premature_start_codon_gain_variant | phosphoinositide phospholipase PIPLC                                 |
| TGME49_246530 | p.Glu355Gly  | missense_variant                               | phospholipase D active site domain-containing protein                |
| TGME49_246530 | p.Ala405Thr  | missense_variant                               | phospholipase D active site domain-containing protein                |
| TGME49_246530 | p.Ala593Val  | missense_variant                               | phospholipase D active site domain-containing protein                |
| TGME49_254420 | p.Pro5Leu    | missense_variant                               | phospholipase, patatin family protein                                |
| TGME49_254420 | p.Ala40Ser   | missense_variant                               | phospholipase, patatin family protein                                |
| TGME49_254420 | p.Asn60Ser   | missense_variant                               | phospholipase, patatin family protein                                |
| TGME49_254420 | p.Ala108Thr  | missense_variant                               | phospholipase, patatin family protein                                |
| TGME49_254420 | p.Ser180Asn  | missense_variant                               | phospholipase, patatin family protein                                |
| TGME49_254420 | p.Asn293Thr  | missense_variant                               | phospholipase, patatin family protein                                |
| TGME49_254420 | p.Ala372Glu  | missense_variant                               | phospholipase, patatin family protein                                |
| TGME49_254420 | p.Gly505Cys  | missense_variant                               | phospholipase, patatin family protein                                |
| TGME49_254420 | p.Lys655Met  | missense_variant                               | phospholipase, patatin family protein                                |
| TGME49_254420 | p.Leu663Val  | missense_variant                               | phospholipase, patatin family protein                                |
| TGME49_212130 | p.Pro308Ser  | missense_variant                               | phospholipase, patatin family protein                                |
| TGME49_212130 | p.Arg436His  | missense_variant                               | phospholipase, patatin family protein                                |
| TGME49_245510 | c.4699-5G>T  | splice_region_variant                          | phospholipid-translocating P-type ATPase, flippase subfamily protein |
| TGME49_245510 | p.His953Arg  | missense_variant                               | phospholipid-translocating P-type ATPase, flippase subfamily protein |
| TGME49_245510 | p.Asn807Ser  | missense_variant                               | phospholipid-translocating P-type ATPase, flippase subfamily protein |
| TGME49_245510 | p.Asp670Asn  | missense_variant                               | phospholipid-translocating P-type ATPase, flippase subfamily protein |
| TGME49_247690 | c.441+7A>C   | splice_region_variant                          | phospholipid-translocating P-type ATPase, flippase subfamily protein |
| TGME49_247690 | p.Ser290Leu  | missense_variant                               | phospholipid-translocating P-type ATPase, flippase subfamily protein |
| TGME49_247690 | p.Arg561Gln  | missense_variant                               | phospholipid-translocating P-type ATPase, flippase subfamily protein |
| TGME49_247690 | p.Asp597Val  | missense_variant                               | phospholipid-translocating P-type ATPase, flippase subfamily protein |
| TGME49_247690 | p.Ala654Thr  | missense_variant                               | phospholipid-translocating P-type ATPase, flippase subfamily protein |
| TGME49_247690 | p.Lys829Met  | missense_variant                               | phospholipid-translocating P-type ATPase, flippase subfamily protein |
| TGME49_239710 | p.Lys9Gln    | missense_variant                               | phosphomannomutase                                                   |
| TGME49_235000 | p.Met284Val  | missense_variant                               | phosphorylase family protein                                         |
| TGME49_235000 | c.-176A>G    | 5_prime_UTR_premature_start_codon_gain_variant | phosphorylase family protein                                         |
| TGME49_222900 | p.Ala226Val  | missense_variant                               | phosphoserine phosphatase                                            |
| TGME49_222900 | p.Arg113His  | missense_variant                               | phosphoserine phosphatase                                            |
| TGME49_253750 | p.Ala5805Thr | missense_variant                               | PLU-1 family protein                                                 |
| TGME49_253750 | p.Thr5696Asn | missense_variant                               | PLU-1 family protein                                                 |
| TGME49_253750 | p.His5694Gln | missense_variant                               | PLU-1 family protein                                                 |
| TGME49_253750 | p.Ala5318Ser | missense_variant                               | PLU-1 family protein                                                 |
| TGME49_253750 | p.Gly5268Val | missense_variant                               | PLU-1 family protein                                                 |
| TGME49_253750 | p.Leu4900Ser | missense_variant                               | PLU-1 family protein                                                 |
| TGME49_253750 | p.Ala4084Thr | missense_variant                               | PLU-1 family protein                                                 |
| TGME49_253750 | p.Ala4061Thr | missense_variant                               | PLU-1 family protein                                                 |
| TGME49_253750 | p.Val3968Leu | missense_variant                               | PLU-1 family protein                                                 |
| TGME49_253750 | p.Pro3676Leu | missense_variant                               | PLU-1 family protein                                                 |
| TGME49_253750 | p.Asp3286Gly | missense_variant                               | PLU-1 family protein                                                 |
| TGME49_253750 | p.Glu2796Asp | missense_variant                               | PLU-1 family protein                                                 |
| TGME49_253750 | p.Ala1687Val | missense_variant                               | PLU-1 family protein                                                 |
| TGME49_253750 | p.Ser1667Pro | missense_variant                               | PLU-1 family protein                                                 |
| TGME49_224850 | c.-1230C>T   | 5_prime_UTR_premature_start_codon_gain_variant | polyadenylate binding protein, putative                              |
| TGME49_224850 | p.Met73Val   | missense_variant                               | polyadenylate binding protein, putative                              |
| TGME49_278260 | p.Ala1861Glu | missense_variant                               | polynucleotide adenyllyltransferase                                  |
| TGME49_278260 | p.Phe1748Leu | missense_variant                               | polynucleotide adenyllyltransferase                                  |
| TGME49_278260 | p.Pro1412Leu | missense_variant                               | polynucleotide adenyllyltransferase                                  |
| TGME49_278260 | c.1535+5T>G  | splice_region_variant                          | polynucleotide adenyllyltransferase                                  |
| TGME49_278260 | p.Gln378Lys  | missense_variant                               | polynucleotide adenyllyltransferase                                  |
| TGME49_278260 | p.Gly195Arg  | missense_variant                               | polynucleotide adenyllyltransferase                                  |
| TGME49_224490 | p.Arg26His   | missense_variant                               | polyprenyl synthetase superfamily protein                            |
| TGME49_224490 | p.Lys31Asn   | missense_variant                               | polyprenyl synthetase superfamily protein                            |
| TGME49_224490 | p.Ala257Ser  | missense_variant                               | polyprenyl synthetase superfamily protein                            |
| TGME49_254730 | p.His1718Arg | missense_variant                               | POPLD (NUC188) domain-containing protein                             |
| TGME49_254730 | p.Gly1711Asp | missense_variant                               | POPLD (NUC188) domain-containing protein                             |
| TGME49_254730 | p.Pro1710Ser | missense_variant                               | POPLD (NUC188) domain-containing protein                             |
| TGME49_215100 | p.Gly2144Trp | missense_variant                               | PP-loop family protein                                               |
| TGME49_215100 | p.Gln2113Glu | missense_variant                               | PP-loop family protein                                               |
| TGME49_215100 | p.Glu2103Lys | missense_variant                               | PP-loop family protein                                               |
| TGME49_215100 | p.Asp1841Ala | missense_variant                               | PP-loop family protein                                               |
| TGME49_215100 | p.Pro1548His | missense_variant                               | PP-loop family protein                                               |
| TGME49_215100 | p.Asp1100Ala | missense_variant                               | PP-loop family protein                                               |
| TGME49_215100 | p.Arg849Gly  | missense_variant                               | PP-loop family protein                                               |
| TGME49_215100 | p.Gly211Asp  | missense_variant                               | PP-loop family protein                                               |
| TGME49_318660 | p.Ser201Arg  | missense_variant                               | PP2C, putative                                                       |
| TGME49_318660 | c.-721C>A    | 5_prime_UTR_premature_start_codon_gain_variant | PP2C, putative                                                       |
| TGME49_221570 | p.Gly311Ala  | missense_variant                               | pre-rRNA-processing protein, putative                                |
| TGME49_248370 | c.-224C>A    | 5_prime_UTR_premature_start_codon_gain_variant | prefoldin subunit 6, putative                                        |
| TGME49_254250 | p.Thr397Lys  | missense_variant                               | PRELI family protein                                                 |

|               |              |                                                |                                                                     |
|---------------|--------------|------------------------------------------------|---------------------------------------------------------------------|
| TGME49_299180 | c.-281C>G    | 5_prime_UTR_premature_start_codon_gain_variant | prenylated protein, putative                                        |
| TGME49_299180 | c.-951C>G    | 5_prime_UTR_premature_start_codon_gain_variant | prenylated protein, putative                                        |
| TGME49_236010 | p.Arg248His  | missense_variant                               | prenylcysteine oxidase                                              |
| TGME49_236010 | p.Ala168Thr  | missense_variant                               | prenylcysteine oxidase                                              |
| TGME49_221850 | c.-761T>C    | 5_prime_UTR_premature_start_codon_gain_variant | prohibitin family protein, putative                                 |
| TGME49_278050 | c.-246C>G    | 5_prime_UTR_premature_start_codon_gain_variant | proteasome subunit alpha type 1, putative                           |
| TGME49_218920 | c.-219C>T    | 5_prime_UTR_premature_start_codon_gain_variant | proteasome subunit beta type, putative                              |
| TGME49_275410 | p.Val2515Met | missense_variant                               | Proteasome/cyclosome repeat-containing protein                      |
| TGME49_249270 | c.688+3G>A   | splice_region_variant                          | protein disulfide isomerase-related protein (provisional), putative |
| TGME49_249270 | c.1391-6T>C  | splice_region_variant                          | protein disulfide isomerase-related protein (provisional), putative |
| TGME49_238040 | p.Glu875Asp  | missense_variant                               | protein disulfide-isomerase domain-containing protein               |
| TGME49_238040 | p.Ser221Leu  | missense_variant                               | protein disulfide-isomerase domain-containing protein               |
| TGME49_218470 | p.Gly454Ser  | missense_variant                               | protein disulfide-isomerase, putative                               |
| TGME49_253950 | p.Ala169Thr  | missense_variant                               | protein fam50a, putative                                            |
| TGME49_239420 | p.Gly1717Ser | missense_variant                               | protein kinase                                                      |
| TGME49_239420 | p.Ala1712Thr | missense_variant                               | protein kinase                                                      |
| TGME49_239420 | p.Val1272Ala | missense_variant                               | protein kinase                                                      |
| TGME49_239420 | p.His969Pro  | missense_variant                               | protein kinase                                                      |
| TGME49_239420 | p.Pro801Gln  | missense_variant                               | protein kinase                                                      |
| TGME49_239420 | c.1569-4T>C  | splice_region_variant                          | protein kinase                                                      |
| TGME49_239420 | c.-4048G>T   | 5_prime_UTR_premature_start_codon_gain_variant | protein kinase                                                      |
| TGME49_239440 | p.Ser220Thr  | missense_variant                               | protein kinase (incomplete catalytic triad)                         |
| TGME49_239440 | p.Ala480Val  | missense_variant                               | protein kinase (incomplete catalytic triad)                         |
| TGME49_239440 | p.Arg713Ser  | missense_variant                               | protein kinase (incomplete catalytic triad)                         |
| TGME49_239440 | p.Ala1054Ser | missense_variant                               | protein kinase (incomplete catalytic triad)                         |
| TGME49_234950 | p.Leu65Arg   | missense_variant                               | protein kinase (incomplete catalytic triad)                         |
| TGME49_236620 | c.664-4C>G   | splice_region_variant                          | protein kinase (incomplete catalytic triad)                         |
| TGME49_237860 | p.Ser180Phe  | missense_variant                               | protein kinase domain-containing protein                            |
| TGME49_237860 | p.Ser501Ala  | missense_variant                               | protein kinase domain-containing protein                            |
| TGME49_237860 | p.Gly957Arg  | missense_variant                               | protein kinase domain-containing protein                            |
| TGME49_237860 | p.Met1652Ile | missense_variant                               | protein kinase domain-containing protein                            |
| TGME49_237860 | p.Asp1674Asn | missense_variant                               | protein kinase domain-containing protein                            |
| TGME49_237860 | p.Asp1932His | missense_variant                               | protein kinase domain-containing protein                            |
| TGME49_237860 | p.Pro1933Ser | missense_variant                               | protein kinase domain-containing protein                            |
| TGME49_275610 | c.-560A>T    | 5_prime_UTR_premature_start_codon_gain_variant | protein kinase, other                                               |
| TGME49_278900 | p.Glu308Lys  | missense_variant                               | protein kinase, putative                                            |
| TGME49_246510 | p.Val126Leu  | missense_variant                               | protein phosphatase 2a regulatory b subunit (b56 family) protein    |
| TGME49_224240 | c.-164C>T    | 5_prime_UTR_premature_start_codon_gain_variant | protein phosphatase 2C domain-containing protein                    |
| TGME49_224240 | p.Gln57Arg   | missense_variant                               | protein phosphatase 2C domain-containing protein                    |
| TGME49_224240 | p.Ala110Pro  | missense_variant                               | protein phosphatase 2C domain-containing protein                    |
| TGME49_224240 | p.Ile250Met  | missense_variant                               | protein phosphatase 2C domain-containing protein                    |
| TGME49_224240 | p.His270Gln  | missense_variant                               | protein phosphatase 2C domain-containing protein                    |
| TGME49_224240 | p.Leu381Phe  | missense_variant                               | protein phosphatase 2C domain-containing protein                    |
| TGME49_224240 | p.Arg439His  | missense_variant                               | protein phosphatase 2C domain-containing protein                    |
| TGME49_224240 | p.Ser529Ala  | missense_variant                               | protein phosphatase 2C domain-containing protein                    |
| TGME49_224240 | p.Ala666Thr  | missense_variant                               | protein phosphatase 2C domain-containing protein                    |
| TGME49_224240 | p.Ala1092Thr | missense_variant                               | protein phosphatase 2C domain-containing protein                    |
| TGME49_236260 | p.Glu207Gln  | missense_variant                               | protein phosphatase 2C domain-containing protein                    |
| TGME49_237410 | p.Gly1039Arg | missense_variant                               | protein phosphatase 2C domain-containing protein                    |
| TGME49_237410 | p.Thr1038Ser | missense_variant                               | protein phosphatase 2C domain-containing protein                    |
| TGME49_237410 | p.Arg930Gly  | missense_variant                               | protein phosphatase 2C domain-containing protein                    |
| TGME49_237410 | p.Gln637Pro  | missense_variant                               | protein phosphatase 2C domain-containing protein                    |
| TGME49_237410 | p.Leu141Ile  | missense_variant                               | protein phosphatase 2C domain-containing protein                    |
| TGME49_237410 | p.Ser68Ala   | missense_variant                               | protein phosphatase 2C domain-containing protein                    |
| TGME49_237410 | c.-1265C>G   | 5_prime_UTR_premature_start_codon_gain_variant | protein phosphatase 2C domain-containing protein                    |
| TGME49_237410 | c.-1772C>G   | 5_prime_UTR_premature_start_codon_gain_variant | protein phosphatase 2C domain-containing protein                    |
| TGME49_237410 | c.-2526A>G   | 5_prime_UTR_premature_start_codon_gain_variant | protein phosphatase 2C domain-containing protein                    |
| TGME49_237410 | c.-3063G>T   | 5_prime_UTR_premature_start_codon_gain_variant | protein phosphatase 2C domain-containing protein                    |
| TGME49_237500 | p.Gly168Arg  | missense_variant                               | protein phosphatase 2C domain-containing protein                    |
| TGME49_237500 | p.Glu230Asp  | missense_variant                               | protein phosphatase 2C domain-containing protein                    |
| TGME49_237500 | p.Gln232His  | missense_variant                               | protein phosphatase 2C domain-containing protein                    |
| TGME49_237500 | p.Ala250Val  | missense_variant                               | protein phosphatase 2C domain-containing protein                    |
| TGME49_237500 | p.Val278Ile  | missense_variant                               | protein phosphatase 2C domain-containing protein                    |
| TGME49_237500 | p.Asp415Ala  | missense_variant                               | protein phosphatase 2C domain-containing protein                    |
| TGME49_237500 | p.Ser495Leu  | missense_variant                               | protein phosphatase 2C domain-containing protein                    |
| TGME49_237500 | p.His738Arg  | missense_variant                               | protein phosphatase 2C domain-containing protein                    |
| TGME49_218590 | p.Arg429Gln  | missense_variant                               | protein phosphatase 2C domain-containing protein                    |
| TGME49_218590 | p.Thr244Ile  | missense_variant                               | protein phosphatase 2C domain-containing protein                    |
| TGME49_254410 | p.Ser384Ala  | missense_variant                               | protein phosphatase 2C, putative                                    |
| TGME49_254410 | p.Arg286Gly  | missense_variant                               | protein phosphatase 2C, putative                                    |
| TGME49_214110 | p.Leu268Phe  | missense_variant                               | protein yipf5, putative                                             |
| TGME49_297520 | p.Ser1499Pro | missense_variant                               | proteophosphoglycan PPG1                                            |
| TGME49_297520 | c.4132+6C>T  | splice_region_variant                          | proteophosphoglycan PPG1                                            |
| TGME49_297520 | p.Ala1300Ser | missense_variant                               | proteophosphoglycan PPG1                                            |
| TGME49_297520 | p.Leu814Val  | missense_variant                               | proteophosphoglycan PPG1                                            |
| TGME49_297520 | p.Glu268Asp  | missense_variant                               | proteophosphoglycan PPG1                                            |
| TGME49_236580 | c.390+4C>A   | splice_region_variant                          | Prp31-15.5k-U4 Snrna Complex family protein                         |
| TGME49_222110 | p.Ala281Ser  | missense_variant                               | PUB domain-containing protein                                       |
| TGME49_222110 | p.Ala281Val  | missense_variant                               | PUB domain-containing protein                                       |
| TGME49_318350 | p.His1578Tyr | missense_variant                               | Pumilio-family RNA binding repeat-containing protein                |
| TGME49_318350 | p.Thr836Ser  | missense_variant                               | Pumilio-family RNA binding repeat-containing protein                |
| TGME49_318350 | p.Ala226Val  | missense_variant                               | Pumilio-family RNA binding repeat-containing protein                |
| TGME49_318350 | p.Ser225Gly  | missense_variant                               | Pumilio-family RNA binding repeat-containing protein                |
| TGME49_318720 | p.Ala502Val  | missense_variant                               | pyridoxal phosphate enzyme, YggS family protein                     |
| TGME49_318720 | p.Asp474Tyr  | missense_variant                               | pyridoxal phosphate enzyme, YggS family protein                     |

|               |              |                                                |                                                                       |
|---------------|--------------|------------------------------------------------|-----------------------------------------------------------------------|
| TGME49_318720 | p.Ser389Tyr  | missense_variant                               | pyridoxal phosphate enzyme, YggS family protein                       |
| TGME49_318720 | c.958+7G>T   | splice_region_variant                          | pyridoxal phosphate enzyme, YggS family protein                       |
| TGME49_318720 | c.958+4A>G   | splice_region_variant                          | pyridoxal phosphate enzyme, YggS family protein                       |
| TGME49_318720 | c.-511A>G    | 5_prime_UTR_premature_start_codon_gain_variant | pyridoxal phosphate enzyme, YggS family protein                       |
| TGME49_245670 | p.Thr564Ser  | missense_variant                               | pyruvate dehydrogenase complex subunit PDH-E1Alpha                    |
| TGME49_299070 | p.Thr65Ser   | missense_variant                               | pyruvate kinase PyKII                                                 |
| TGME49_299070 | p.Ala510Val  | missense_variant                               | pyruvate kinase PyKII                                                 |
| TGME49_299070 | p.Arg605Ser  | missense_variant                               | pyruvate kinase PyKII                                                 |
| TGME49_299070 | p.Cys764Gly  | missense_variant                               | pyruvate kinase PyKII                                                 |
| TGME49_252465 | p.Lys334Thr  | missense_variant                               | radical SAM domain-containing protein                                 |
| TGME49_252465 | p.Leu146His  | missense_variant                               | radical SAM domain-containing protein                                 |
| TGME49_252465 | p.Ser120Thr  | missense_variant                               | radical SAM domain-containing protein                                 |
| TGME49_219300 | p.Leu230Val  | missense_variant                               | ran binding protein                                                   |
| TGME49_222040 | c.-548C>T    | 5_prime_UTR_premature_start_codon_gain_variant | Ran-interacting Mog1 protein                                          |
| TGME49_222040 | c.-277A>T    | 5_prime_UTR_premature_start_codon_gain_variant | Ran-interacting Mog1 protein                                          |
| TGME49_222040 | c.212+6C>T   | splice_region_variant                          | Ran-interacting Mog1 protein                                          |
| TGME49_239350 | p.Asp2228Glu | missense_variant                               | RAP domain-containing protein                                         |
| TGME49_239350 | p.Val2226Gly | missense_variant                               | RAP domain-containing protein                                         |
| TGME49_239350 | p.Gly2218Ser | missense_variant                               | RAP domain-containing protein                                         |
| TGME49_239350 | p.Asn2150Asp | missense_variant                               | RAP domain-containing protein                                         |
| TGME49_239350 | p.Glu2093Asp | missense_variant                               | RAP domain-containing protein                                         |
| TGME49_239350 | p.Ala1989Ser | missense_variant                               | RAP domain-containing protein                                         |
| TGME49_239350 | p.Ser1966Pro | missense_variant                               | RAP domain-containing protein                                         |
| TGME49_239350 | p.Asp1456Asn | missense_variant                               | RAP domain-containing protein                                         |
| TGME49_239350 | p.Ser1090Pro | missense_variant                               | RAP domain-containing protein                                         |
| TGME49_239350 | p.Leu443Gln  | missense_variant                               | RAP domain-containing protein                                         |
| TGME49_239350 | p.Pro389Ser  | missense_variant                               | RAP domain-containing protein                                         |
| TGME49_239350 | c.944-5C>A   | splice_region_variant                          | RAP domain-containing protein                                         |
| TGME49_239350 | p.Pro255Ser  | missense_variant                               | RAP domain-containing protein                                         |
| TGME49_239350 | p.Asp110Asn  | missense_variant                               | RAP domain-containing protein                                         |
| TGME49_239350 | p.Leu89Phe   | missense_variant                               | RAP domain-containing protein                                         |
| TGME49_211890 | p.Phe5229Ser | missense_variant                               | RAP domain-containing protein                                         |
| TGME49_211890 | p.Gly5134Val | missense_variant                               | RAP domain-containing protein                                         |
| TGME49_211890 | p.Ser4966Ile | missense_variant                               | RAP domain-containing protein                                         |
| TGME49_211890 | p.Arg4466Ile | missense_variant                               | RAP domain-containing protein                                         |
| TGME49_211890 | p.Val3215Met | missense_variant                               | RAP domain-containing protein                                         |
| TGME49_211890 | p.Ala2673Thr | missense_variant                               | RAP domain-containing protein                                         |
| TGME49_211890 | p.Tyr1626His | missense_variant                               | RAP domain-containing protein                                         |
| TGME49_211890 | p.Trp174Leu  | missense_variant                               | RAP domain-containing protein                                         |
| TGME49_211890 | p.Ser137Asn  | missense_variant                               | RAP domain-containing protein                                         |
| TGME49_211890 | p.Cys52Gly   | missense_variant                               | RAP domain-containing protein                                         |
| TGME49_237100 | p.Arg1412Lys | missense_variant                               | RAP domain-containing protein                                         |
| TGME49_249170 | p.Val332Ala  | missense_variant                               | Ras family protein                                                    |
| TGME49_249170 | c.1027-4A>G  | splice_region_variant                          | Ras family protein                                                    |
| TGME49_249170 | p.Thr668Ala  | missense_variant                               | Ras family protein                                                    |
| TGME49_249170 | p.Ala680Thr  | missense_variant                               | Ras family protein                                                    |
| TGME49_277840 | c.664-5C>T   | splice_region_variant                          | Ras family protein                                                    |
| TGME49_277840 | c.-328T>C    | 5_prime_UTR_premature_start_codon_gain_variant | Ras family protein                                                    |
| TGME49_277840 | c.-1488C>T   | 5_prime_UTR_premature_start_codon_gain_variant | Ras family protein                                                    |
| TGME49_219720 | c.-251C>G    | 5_prime_UTR_premature_start_codon_gain_variant | Ras-related protein Rab-5C, putative                                  |
| TGME49_247250 | p.Glu235Asp  | missense_variant                               | RbAp46                                                                |
| TGME49_247250 | p.Glu182Asp  | missense_variant                               | RbAp46                                                                |
| TGME49_247250 | p.Arg95Leu   | missense_variant                               | RbAp46                                                                |
| TGME49_247250 | p.Ser72Pro   | missense_variant                               | RbAp46                                                                |
| TGME49_297800 | p.Pro611Ala  | missense_variant                               | RecF/RecN/SMC N terminal domain-containing protein                    |
| TGME49_297800 | p.Ala435Thr  | missense_variant                               | RecF/RecN/SMC N terminal domain-containing protein                    |
| TGME49_297800 | c.-213C>G    | 5_prime_UTR_premature_start_codon_gain_variant | RecF/RecN/SMC N terminal domain-containing protein                    |
| TGME49_297800 | c.-221T>C    | 5_prime_UTR_premature_start_codon_gain_variant | RecF/RecN/SMC N terminal domain-containing protein                    |
| TGME49_239700 | p.Ala35Thr   | missense_variant                               | regulator of chromosome condensation (RCC1) repeat-containing protein |
| TGME49_239700 | p.Thr361Ala  | missense_variant                               | regulator of chromosome condensation (RCC1) repeat-containing protein |
| TGME49_239700 | p.Leu702Pro  | missense_variant                               | regulator of chromosome condensation (RCC1) repeat-containing protein |
| TGME49_239700 | p.Cys1188Ser | missense_variant                               | regulator of chromosome condensation (RCC1) repeat-containing protein |
| TGME49_239700 | p.Asp1808Asn | missense_variant                               | regulator of chromosome condensation (RCC1) repeat-containing protein |
| TGME49_239700 | p.Ala2572Pro | missense_variant                               | regulator of chromosome condensation (RCC1) repeat-containing protein |
| TGME49_239700 | p.Gly2595Arg | missense_variant                               | regulator of chromosome condensation (RCC1) repeat-containing protein |
| TGME49_239700 | p.Glu2711Asp | missense_variant                               | regulator of chromosome condensation (RCC1) repeat-containing protein |
| TGME49_280770 | c.682+3G>A   | splice_region_variant                          | regulator of chromosome condensation (RCC1) repeat-containing protein |
| TGME49_280770 | c.863-6C>G   | splice_region_variant                          | regulator of chromosome condensation (RCC1) repeat-containing protein |
| TGME49_280770 | p.Gly608Asp  | missense_variant                               | regulator of chromosome condensation (RCC1) repeat-containing protein |
| TGME49_280770 | p.Lys861Thr  | missense_variant                               | regulator of chromosome condensation (RCC1) repeat-containing protein |
| TGME49_280770 | p.Ala938Thr  | missense_variant                               | regulator of chromosome condensation (RCC1) repeat-containing protein |
| TGME49_280770 | p.Ala1139Thr | missense_variant                               | regulator of chromosome condensation (RCC1) repeat-containing protein |
| TGME49_236250 | c.-15C>T     | 5_prime_UTR_premature_start_codon_gain_variant | regulator of chromosome condensation (RCC1) repeat-containing protein |
| TGME49_236250 | p.Ala82Thr   | missense_variant                               | regulator of chromosome condensation (RCC1) repeat-containing protein |
| TGME49_236250 | p.Val438Leu  | missense_variant                               | regulator of chromosome condensation (RCC1) repeat-containing protein |
| TGME49_236250 | p.Arg699Gln  | missense_variant                               | regulator of chromosome condensation (RCC1) repeat-containing protein |
| TGME49_236250 | p.Pro763Ser  | missense_variant                               | regulator of chromosome condensation (RCC1) repeat-containing protein |
| TGME49_236250 | p.Gly773Ser  | missense_variant                               | regulator of chromosome condensation (RCC1) repeat-containing protein |
| TGME49_236250 | p.Pro836Ala  | missense_variant                               | regulator of chromosome condensation (RCC1) repeat-containing protein |
| TGME49_248640 | c.1351-8T>C  | splice_region_variant                          | regulator of chromosome condensation (RCC1) repeat-containing protein |
| TGME49_248640 | p.Ile153Val  | missense_variant                               | regulator of chromosome condensation (RCC1) repeat-containing protein |
| TGME49_249000 | p.Ser681*    | stop_gained                                    | regulator of chromosome condensation (RCC1) repeat-containing protein |
| TGME49_249000 | p.Ser681Thr  | missense_variant                               | regulator of chromosome condensation (RCC1) repeat-containing protein |
| TGME49_249000 | p.Gly95Ala   | missense_variant                               | regulator of chromosome condensation (RCC1) repeat-containing protein |
| TGME49_238110 | p.Arg75His   | missense_variant                               | replication factor a protein 3 protein                                |

|               |              |                                                |                                                                                     |
|---------------|--------------|------------------------------------------------|-------------------------------------------------------------------------------------|
| TGME49_214480 | p.Pro158Ser  | missense_variant                               | replication factor a protein 3 protein                                              |
| TGME49_237110 | p.Leu98Val   | missense_variant                               | replication factor C subunit 2, putative                                            |
| TGME49_210960 | p.Glu245Gln  | missense_variant                               | replication factor C subunit 4, putative                                            |
| TGME49_236080 | c.-523A>C    | 5_prime_UTR_premature_start_codon_gain_variant | replication factor-a protein 1 (rpa1) subfamily protein                             |
| TGME49_219860 | c.-447T>G    | 5_prime_UTR_premature_start_codon_gain_variant | replication licensing factor, putative                                              |
| TGME49_245590 | p.Phe472Leu  | missense_variant                               | rhomboid protease ROM6                                                              |
| TGME49_308096 | p.His350Arg  | missense_variant                               | rhoptyr kinase family protein (incomplete catalytic triad)                          |
| TGME49_308096 | p.Pro313Thr  | missense_variant                               | rhoptyr kinase family protein (incomplete catalytic triad)                          |
| TGME49_239600 | p.Lys545Arg  | missense_variant                               | rhoptyr kinase family protein ROP23 (incomplete catalytic triad)                    |
| TGME49_252360 | p.Gln229Lys  | missense_variant                               | rhoptyr kinase family protein ROP24 (incomplete catalytic triad)                    |
| TGME49_252360 | p.Ser462Leu  | missense_variant                               | rhoptyr kinase family protein ROP24 (incomplete catalytic triad)                    |
| TGME49_211260 | p.Thr191Ala  | missense_variant                               | rhoptyr kinase family protein ROP26 (incomplete catalytic triad)                    |
| TGME49_240090 | p.Phe46Leu   | missense_variant                               | rhoptyr kinase family protein ROP34, putative                                       |
| TGME49_240090 | p.Glu506Asp  | missense_variant                               | rhoptyr kinase family protein ROP34, putative                                       |
| TGME49_240090 | p.Gln527His  | missense_variant                               | rhoptyr kinase family protein ROP34, putative                                       |
| TGME49_300100 | p.Gln378His  | missense_variant                               | rhoptyr neck protein RON2                                                           |
| TGME49_300100 | p.Asn372Asp  | missense_variant                               | rhoptyr neck protein RON2                                                           |
| TGME49_223920 | p.Lys1548Arg | missense_variant                               | rhoptyr neck protein RON3                                                           |
| TGME49_297960 | p.Asn1196Tyr | missense_variant                               | rhoptyr neck protein RON6                                                           |
| TGME49_297960 | p.Ile1181Leu | missense_variant                               | rhoptyr neck protein RON6                                                           |
| TGME49_297960 | p.Ala1102Val | missense_variant                               | rhoptyr neck protein RON6                                                           |
| TGME49_297960 | p.Ala1072Thr | missense_variant                               | rhoptyr neck protein RON6                                                           |
| TGME49_297960 | p.Pro751Ser  | missense_variant                               | rhoptyr neck protein RON6                                                           |
| TGME49_211290 | p.His317Gln  | missense_variant                               | rhoptyr protein ROP15                                                               |
| TGME49_211290 | p.Asp238Glu  | missense_variant                               | rhoptyr protein ROP15                                                               |
| TGME49_211290 | p.Ile220Leu  | missense_variant                               | rhoptyr protein ROP15                                                               |
| TGME49_235905 | p.Val259Leu  | missense_variant                               | ribonuclease z, putative                                                            |
| TGME49_235905 | c.952-8C>T   | splice_region_variant                          | ribonuclease z, putative                                                            |
| TGME49_235905 | p.Ser355Pro  | missense_variant                               | ribonuclease z, putative                                                            |
| TGME49_235905 | p.Pro357Ser  | missense_variant                               | ribonuclease z, putative                                                            |
| TGME49_235905 | p.Thr398Ala  | missense_variant                               | ribonuclease z, putative                                                            |
| TGME49_235905 | p.Lys531Arg  | missense_variant                               | ribonuclease z, putative                                                            |
| TGME49_235905 | p.Ser897Thr  | missense_variant                               | ribonuclease z, putative                                                            |
| TGME49_235905 | c.2932-3T>C  | splice_region_variant                          | ribonuclease z, putative                                                            |
| TGME49_254380 | c.418-5T>C   | splice_region_variant                          | ribosomal protein L11, putative                                                     |
| TGME49_253800 | p.Gly126Arg  | missense_variant                               | ribosomal protein L15, putative                                                     |
| TGME49_253800 | p.Gly189Asp  | missense_variant                               | ribosomal protein L15, putative                                                     |
| TGME49_300613 | p.Thr40Ala   | missense_variant                               | ribosomal protein L16, putative                                                     |
| TGME49_214870 | p.Val123Met  | missense_variant                               | ribosomal protein L9, N-terminal domain-containing protein                          |
| TGME49_214870 | p.Gly182Asp  | missense_variant                               | ribosomal protein L9, N-terminal domain-containing protein                          |
| TGME49_300000 | c.-1922C>T   | 5_prime_UTR_premature_start_codon_gain_variant | ribosomal protein RPL18                                                             |
| TGME49_300000 | c.-1430G>T   | 5_prime_UTR_premature_start_codon_gain_variant | ribosomal protein RPL18                                                             |
| TGME49_300000 | c.-116T>G    | 5_prime_UTR_premature_start_codon_gain_variant | ribosomal protein RPL18                                                             |
| TGME49_300000 | c.467-8G>A   | splice_region_variant                          | ribosomal protein RPL18                                                             |
| TGME49_245680 | c.-7G>C      | 5_prime_UTR_premature_start_codon_gain_variant | ribosomal protein RPL21                                                             |
| TGME49_238010 | c.-263T>C    | 5_prime_UTR_premature_start_codon_gain_variant | ribosomal protein RPL23A                                                            |
| TGME49_250810 | c.-1014G>C   | 5_prime_UTR_premature_start_codon_gain_variant | ribosomal protein RPL35                                                             |
| TGME49_218410 | p.Glu229Gly  | missense_variant                               | ribosomal protein RPP0                                                              |
| TGME49_217670 | p.Ser165Pro  | missense_variant                               | ribosomal protein RPS6                                                              |
| TGME49_217670 | p.Leu390Phe  | missense_variant                               | ribosomal protein RPS6                                                              |
| TGME49_239100 | c.*1314G>T   | splice_region_variant                          | ribosomal protein RPS7                                                              |
| TGME49_218850 | p.Trp6Cys    | missense_variant                               | ribosomal protein RPS9                                                              |
| TGME49_277700 | c.-130C>T    | 5_prime_UTR_premature_start_codon_gain_variant | ribosomal protein S14 precursor, putative                                           |
| TGME49_222990 | p.Ala17Thr   | missense_variant                               | ribosomal protein S18, putative                                                     |
| TGME49_300606 | p.Ile265Arg  | missense_variant                               | ribosomal protein S5, putative                                                      |
| TGME49_248200 | c.-667C>T    | 5_prime_UTR_premature_start_codon_gain_variant | ribosomal RNA (adenine(1779)-N(6)/adenine(1780)-N(6))-dimethyltransferase, putative |
| TGME49_248200 | c.-485C>T    | 5_prime_UTR_premature_start_codon_gain_variant | ribosomal RNA (adenine(1779)-N(6)/adenine(1780)-N(6))-dimethyltransferase, putative |
| TGME49_248200 | p.Phe106Ser  | missense_variant                               | ribosomal RNA (adenine(1779)-N(6)/adenine(1780)-N(6))-dimethyltransferase, putative |
| TGME49_221580 | p.Glu200Asp  | missense_variant                               | ribosomal RNA large subunit methyltransferase J protein                             |
| TGME49_221580 | c.3684-6C>G  | splice_region_variant                          | ribosomal RNA large subunit methyltransferase J protein                             |
| TGME49_221580 | p.Cys1834Gly | missense_variant                               | ribosomal RNA large subunit methyltransferase J protein                             |
| TGME49_221580 | p.Glu1960Gly | missense_variant                               | ribosomal RNA large subunit methyltransferase J protein                             |
| TGME49_221580 | p.Pro2032Ser | missense_variant                               | ribosomal RNA large subunit methyltransferase J protein                             |
| TGME49_278500 | p.Ile6Leu    | missense_variant                               | ribosomal RNA large subunit methyltransferase J protein                             |
| TGME49_278500 | c.2344+6C>T  | splice_region_variant                          | ribosomal RNA large subunit methyltransferase J protein                             |
| TGME49_278500 | p.Asp913Gly  | missense_variant                               | ribosomal RNA large subunit methyltransferase J protein                             |
| TGME49_278500 | p.Gly924Arg  | missense_variant                               | ribosomal RNA large subunit methyltransferase J protein                             |
| TGME49_278500 | p.Ser938Ala  | missense_variant                               | ribosomal RNA large subunit methyltransferase J protein                             |
| TGME49_278500 | c.3974-4G>T  | splice_region_variant                          | ribosomal RNA large subunit methyltransferase J protein                             |
| TGME49_220940 | p.Ala228Val  | missense_variant                               | ribosomal RNA methyltransferase (FtsJ) family protein                               |
| TGME49_301390 | p.Ser28Pro   | missense_variant                               | ribosome biogenesis protein BOP1, putative                                          |
| TGME49_239310 | c.-394A>G    | 5_prime_UTR_premature_start_codon_gain_variant | ribulose 5-phosphate isomerase                                                      |
| TGME49_239310 | c.-196T>C    | 5_prime_UTR_premature_start_codon_gain_variant | ribulose 5-phosphate isomerase                                                      |
| TGME49_239310 | p.Lys183Glu  | missense_variant                               | ribulose 5-phosphate isomerase                                                      |
| TGME49_210830 | p.Ser200Arg  | missense_variant                               | RIO1 family protein                                                                 |
| TGME49_210830 | p.Ala503Glu  | missense_variant                               | RIO1 family protein                                                                 |
| TGME49_210830 | p.Gln575Glu  | missense_variant                               | RIO1 family protein                                                                 |
| TGME49_210830 | p.Arg623Lys  | missense_variant                               | RIO1 family protein                                                                 |
| TGME49_210830 | p.Glu766Asp  | missense_variant                               | RIO1 family protein                                                                 |
| TGME49_254950 | p.Cys287Ser  | missense_variant                               | RNA cap guanine-N2 methyltransferase                                                |
| TGME49_254950 | p.Asn310His  | missense_variant                               | RNA cap guanine-N2 methyltransferase                                                |
| TGME49_254950 | p.Arg323Gly  | missense_variant                               | RNA cap guanine-N2 methyltransferase                                                |
| TGME49_254950 | p.Asp445Glu  | missense_variant                               | RNA cap guanine-N2 methyltransferase                                                |
| TGME49_254950 | p.Ala920Val  | missense_variant                               | RNA cap guanine-N2 methyltransferase                                                |
| TGME49_218580 | p.Ala438Ser  | missense_variant                               | RNA methyltransferase, TrmH family protein                                          |

|               |              |                                                |                                                          |
|---------------|--------------|------------------------------------------------|----------------------------------------------------------|
| TGME49_218580 | p.Ile448Val  | missense_variant                               | RNA methyltransferase, TrmH family protein               |
| TGME49_218580 | p.Asn1531Lys | missense_variant                               | RNA methyltransferase, TrmH family protein               |
| TGME49_218580 | p.Asn1571Ser | missense_variant                               | RNA methyltransferase, TrmH family protein               |
| TGME49_218580 | p.Cys1921Arg | missense_variant                               | RNA methyltransferase, TrmH family protein               |
| TGME49_218580 | p.Val2116Gly | missense_variant                               | RNA methyltransferase, TrmH family protein               |
| TGME49_218580 | c.7691-8T>G  | splice_region_variant                          | RNA methyltransferase, TrmH family protein               |
| TGME49_218580 | c.8409+5C>T  | splice_region_variant                          | RNA methyltransferase, TrmH family protein               |
| TGME49_249680 | c.-228A>G    | 5_prime_UTR_premature_start_codon_gain_variant | RNA polymerase II associated Paf1 complex component PAF1 |
| TGME49_249680 | p.Arg238Gly  | missense_variant                               | RNA polymerase II associated Paf1 complex component PAF1 |
| TGME49_299030 | p.His210Leu  | missense_variant                               | RNA recognition motif 2 protein                          |
| TGME49_254210 | c.-560C>G    | 5_prime_UTR_premature_start_codon_gain_variant | RNA recognition motif-containing protein                 |
| TGME49_254210 | p.Val205Ile  | missense_variant                               | RNA recognition motif-containing protein                 |
| TGME49_254210 | p.Ser418Cys  | missense_variant                               | RNA recognition motif-containing protein                 |
| TGME49_254210 | p.Ser436Tyr  | missense_variant                               | RNA recognition motif-containing protein                 |
| TGME49_254210 | p.Leu510Val  | missense_variant                               | RNA recognition motif-containing protein                 |
| TGME49_254210 | p.Gly1003Ser | missense_variant                               | RNA recognition motif-containing protein                 |
| TGME49_254210 | p.Gln1030His | missense_variant                               | RNA recognition motif-containing protein                 |
| TGME49_320100 | c.-2695C>A   | 5_prime_UTR_premature_start_codon_gain_variant | RNA recognition motif-containing protein                 |
| TGME49_320100 | c.-992A>G    | 5_prime_UTR_premature_start_codon_gain_variant | RNA recognition motif-containing protein                 |
| TGME49_320100 | c.-380C>T    | 5_prime_UTR_premature_start_codon_gain_variant | RNA recognition motif-containing protein                 |
| TGME49_320100 | p.Ala337Thr  | missense_variant                               | RNA recognition motif-containing protein                 |
| TGME49_320100 | p.Val383Met  | missense_variant                               | RNA recognition motif-containing protein                 |
| TGME49_318690 | p.Ala839Gly  | missense_variant                               | RNA recognition motif-containing protein                 |
| TGME49_240070 | c.-956A>T    | 5_prime_UTR_premature_start_codon_gain_variant | RNA recognition motif-containing protein                 |
| TGME49_240070 | c.-1685A>T   | 5_prime_UTR_premature_start_codon_gain_variant | RNA recognition motif-containing protein                 |
| TGME49_223855 | p.Gln392Glu  | missense_variant                               | RNA recognition motif-containing protein                 |
| TGME49_223855 | p.His320Asp  | missense_variant                               | RNA recognition motif-containing protein                 |
| TGME49_223855 | p.Glu164Gly  | missense_variant                               | RNA recognition motif-containing protein                 |
| TGME49_223855 | p.Ser73Ala   | missense_variant                               | RNA recognition motif-containing protein                 |
| TGME49_223855 | p.Leu68Phe   | missense_variant                               | RNA recognition motif-containing protein                 |
| TGME49_236540 | c.-760G>T    | 5_prime_UTR_premature_start_codon_gain_variant | RNA recognition motif-containing protein                 |
| TGME49_215230 | c.-168G>T    | 5_prime_UTR_premature_start_codon_gain_variant | RNA recognition motif-containing protein                 |
| TGME49_218600 | p.Ala64Thr   | missense_variant                               | RNA recognition motif-containing protein                 |
| TGME49_218600 | p.Pro595Ser  | missense_variant                               | RNA recognition motif-containing protein                 |
| TGME49_218600 | p.Arg682Gln  | missense_variant                               | RNA recognition motif-containing protein                 |
| TGME49_218600 | p.Ser705Thr  | missense_variant&splice_region_variant         | RNA recognition motif-containing protein                 |
| TGME49_218600 | p.Arg711Ser  | missense_variant                               | RNA recognition motif-containing protein                 |
| TGME49_239480 | p.Lys1075Glu | missense_variant&splice_region_variant         | RNB family domain-containing protein                     |
| TGME49_239480 | p.Pro950Ser  | missense_variant                               | RNB family domain-containing protein                     |
| TGME49_239480 | p.Glu905Ala  | missense_variant                               | RNB family domain-containing protein                     |
| TGME49_239480 | p.Arg699Gly  | missense_variant                               | RNB family domain-containing protein                     |
| TGME49_239480 | p.Ile329Val  | missense_variant                               | RNB family domain-containing protein                     |
| TGME49_239480 | p.Ile129Leu  | missense_variant                               | RNB family domain-containing protein                     |
| TGME49_239480 | c.-31A>T     | 5_prime_UTR_premature_start_codon_gain_variant | RNB family domain-containing protein                     |
| TGME49_221440 | p.Leu1933Arg | missense_variant                               | RPGR, putative                                           |
| TGME49_221440 | p.Asp1610Tyr | missense_variant                               | RPGR, putative                                           |
| TGME49_221440 | p.Ser1251Cys | missense_variant                               | RPGR, putative                                           |
| TGME49_221440 | p.Ser1026Tyr | missense_variant                               | RPGR, putative                                           |
| TGME49_221440 | p.Arg772His  | missense_variant                               | RPGR, putative                                           |
| TGME49_221440 | p.Gly727Arg  | missense_variant                               | RPGR, putative                                           |
| TGME49_221440 | p.Glu656Asp  | missense_variant                               | RPGR, putative                                           |
| TGME49_221440 | p.Glu646Lys  | missense_variant                               | RPGR, putative                                           |
| TGME49_221440 | p.His401Tyr  | missense_variant                               | RPGR, putative                                           |
| TGME49_221440 | p.Ala360Glu  | missense_variant                               | RPGR, putative                                           |
| TGME49_221440 | p.Ala311Gly  | missense_variant                               | RPGR, putative                                           |
| TGME49_221440 | p.Ile263Val  | missense_variant                               | RPGR, putative                                           |
| TGME49_221440 | p.Arg34Trp   | missense_variant                               | RPGR, putative                                           |
| TGME49_221440 | p.Asp31Glu   | missense_variant                               | RPGR, putative                                           |
| TGME49_214210 | c.-629T>G    | 5_prime_UTR_premature_start_codon_gain_variant | rRNA pseudouridine synthase                              |
| TGME49_319950 | c.4-7C>A     | splice_region_variant                          | rRNA-processing protein FCF1, putative                   |
| TGME49_319950 | c.3+6C>G     | splice_region_variant                          | rRNA-processing protein FCF1, putative                   |
| TGME49_319950 | c.-419C>T    | 5_prime_UTR_premature_start_codon_gain_variant | rRNA-processing protein FCF1, putative                   |
| TGME49_280760 | c.-100C>T    | 5_prime_UTR_premature_start_codon_gain_variant | RUB1 conjugating enzyme                                  |
| TGME49_280750 | c.-734T>G    | 5_prime_UTR_premature_start_codon_gain_variant | rudimentary enhancer, putative                           |
| TGME49_211670 | p.Thr296Ala  | missense_variant                               | S1 RNA binding domain-containing protein                 |
| TGME49_217790 | p.Ile2101Thr | missense_variant                               | S1 RNA binding domain-containing protein                 |
| TGME49_217790 | p.Ala2047Pro | missense_variant                               | S1 RNA binding domain-containing protein                 |
| TGME49_217790 | p.Ser2019Pro | missense_variant                               | S1 RNA binding domain-containing protein                 |
| TGME49_217790 | p.Glu1928Gly | missense_variant                               | S1 RNA binding domain-containing protein                 |
| TGME49_217790 | p.Asp1913Gly | missense_variant                               | S1 RNA binding domain-containing protein                 |
| TGME49_217790 | p.Leu1869Pro | missense_variant                               | S1 RNA binding domain-containing protein                 |
| TGME49_217790 | p.Val1851Ile | missense_variant                               | S1 RNA binding domain-containing protein                 |
| TGME49_217790 | p.Gly1842Arg | missense_variant                               | S1 RNA binding domain-containing protein                 |
| TGME49_217790 | p.Ala1837Val | missense_variant                               | S1 RNA binding domain-containing protein                 |
| TGME49_217790 | p.Ser1756Phe | missense_variant                               | S1 RNA binding domain-containing protein                 |
| TGME49_217790 | p.Ala1749Thr | missense_variant                               | S1 RNA binding domain-containing protein                 |
| TGME49_217790 | p.Ile983Val  | missense_variant                               | S1 RNA binding domain-containing protein                 |
| TGME49_217790 | p.Val957Gly  | missense_variant                               | S1 RNA binding domain-containing protein                 |
| TGME49_217790 | p.Leu679His  | missense_variant                               | S1 RNA binding domain-containing protein                 |
| TGME49_217790 | p.Lys408Thr  | missense_variant                               | S1 RNA binding domain-containing protein                 |
| TGME49_217790 | p.Leu315Pro  | missense_variant                               | S1 RNA binding domain-containing protein                 |
| TGME49_217790 | p.Thr307Arg  | missense_variant                               | S1 RNA binding domain-containing protein                 |
| TGME49_217790 | p.Ser280Ala  | missense_variant                               | S1 RNA binding domain-containing protein                 |
| TGME49_217790 | p.Arg279Pro  | missense_variant                               | S1 RNA binding domain-containing protein                 |
| TGME49_217790 | p.Pro109Leu  | missense_variant                               | S1 RNA binding domain-containing protein                 |

|               |              |                                                |                                      |
|---------------|--------------|------------------------------------------------|--------------------------------------|
| TGME49_250010 | p.Phe709Val  | missense_variant                               | Sad1 / UNC family C-terminal protein |
| TGME49_250010 | p.Thr684Ser  | missense_variant                               | Sad1 / UNC family C-terminal protein |
| TGME49_250010 | p.Ala86Thr   | missense_variant                               | Sad1 / UNC family C-terminal protein |
| TGME49_250010 | p.Thr67Ala   | missense_variant                               | Sad1 / UNC family C-terminal protein |
| TGME49_250010 | c.-329C>T    | 5_prime_UTR_premature_start_codon_gain_variant | Sad1 / UNC family C-terminal protein |
| TGME49_207120 | p.Lys714Thr  | missense_variant                               | Sad1/UNC family protein              |
| TGME49_207120 | p.Ala775Thr  | missense_variant                               | Sad1/UNC family protein              |
| TGME49_207120 | p.Ala884Val  | missense_variant                               | Sad1/UNC family protein              |
| TGME49_207120 | p.Lys1656Arg | missense_variant                               | Sad1/UNC family protein              |
| TGME49_207120 | p.Arg1805His | missense_variant                               | Sad1/UNC family protein              |
| TGME49_207120 | p.Gly2045Ser | missense_variant                               | Sad1/UNC family protein              |
| TGME49_207120 | p.Pro2074Arg | missense_variant                               | Sad1/UNC family protein              |
| TGME49_207120 | p.Ala2954Thr | missense_variant                               | Sad1/UNC family protein              |
| TGME49_207120 | p.Ala3040Val | missense_variant                               | Sad1/UNC family protein              |
| TGME49_207120 | p.Ala3157Gly | missense_variant                               | Sad1/UNC family protein              |
| TGME49_207120 | p.Gln3181Pro | missense_variant                               | Sad1/UNC family protein              |
| TGME49_207120 | p.Phe3248Val | missense_variant                               | Sad1/UNC family protein              |
| TGME49_222370 | p.Thr671Pro  | missense_variant                               | SAG-related sequence SRS13           |
| TGME49_222370 | p.Phe880Leu  | missense_variant                               | SAG-related sequence SRS13           |
| TGME49_320250 | p.Asn349Lys  | missense_variant                               | SAG-related sequence SRS15A          |
| TGME49_320250 | p.Asn349Thr  | missense_variant                               | SAG-related sequence SRS15A          |
| TGME49_320250 | p.Gly343Glu  | missense_variant                               | SAG-related sequence SRS15A          |
| TGME49_320250 | p.Pro337Leu  | missense_variant                               | SAG-related sequence SRS15A          |
| TGME49_320250 | p.Asp300Asn  | missense_variant                               | SAG-related sequence SRS15A          |
| TGME49_320250 | p.Ala263Glu  | missense_variant                               | SAG-related sequence SRS15A          |
| TGME49_320250 | p.Lys223Glu  | missense_variant                               | SAG-related sequence SRS15A          |
| TGME49_320250 | p.Pro202Ser  | missense_variant                               | SAG-related sequence SRS15A          |
| TGME49_320250 | p.Glu201Gln  | missense_variant                               | SAG-related sequence SRS15A          |
| TGME49_320250 | p.Val200Gly  | missense_variant                               | SAG-related sequence SRS15A          |
| TGME49_320250 | p.Asp196Ala  | missense_variant                               | SAG-related sequence SRS15A          |
| TGME49_320250 | p.Arg194Ser  | missense_variant                               | SAG-related sequence SRS15A          |
| TGME49_320250 | p.Ile172Met  | missense_variant                               | SAG-related sequence SRS15A          |
| TGME49_320250 | p.Thr164Ile  | missense_variant                               | SAG-related sequence SRS15A          |
| TGME49_320250 | p.Lys162Asn  | missense_variant                               | SAG-related sequence SRS15A          |
| TGME49_320250 | p.Thr161Ala  | missense_variant                               | SAG-related sequence SRS15A          |
| TGME49_320250 | p.Asp140Asn  | missense_variant                               | SAG-related sequence SRS15A          |
| TGME49_320250 | p.Glu136Asp  | missense_variant                               | SAG-related sequence SRS15A          |
| TGME49_320250 | p.Thr135Lys  | missense_variant                               | SAG-related sequence SRS15A          |
| TGME49_320250 | p.Asp125Glu  | missense_variant                               | SAG-related sequence SRS15A          |
| TGME49_320240 | p.Thr341Asn  | missense_variant                               | SAG-related sequence SRS15B          |
| TGME49_320240 | p.His335Gln  | missense_variant                               | SAG-related sequence SRS15B          |
| TGME49_320240 | p.Asp283Asn  | missense_variant                               | SAG-related sequence SRS15B          |
| TGME49_320240 | p.Ile250Met  | missense_variant                               | SAG-related sequence SRS15B          |
| TGME49_320240 | p.Ile250Thr  | missense_variant                               | SAG-related sequence SRS15B          |
| TGME49_320240 | p.Arg237Lys  | missense_variant                               | SAG-related sequence SRS15B          |
| TGME49_320240 | p.Gln229Arg  | missense_variant                               | SAG-related sequence SRS15B          |
| TGME49_320240 | p.Leu187Phe  | missense_variant                               | SAG-related sequence SRS15B          |
| TGME49_320240 | p.Thr127Ala  | missense_variant                               | SAG-related sequence SRS15B          |
| TGME49_320240 | p.Glu115Asp  | missense_variant                               | SAG-related sequence SRS15B          |
| TGME49_320240 | p.Pro112His  | missense_variant                               | SAG-related sequence SRS15B          |
| TGME49_320240 | p.Ala105Ser  | missense_variant                               | SAG-related sequence SRS15B          |
| TGME49_320240 | p.Glu84Asp   | missense_variant                               | SAG-related sequence SRS15B          |
| TGME49_320240 | p.Pro81Ser   | missense_variant                               | SAG-related sequence SRS15B          |
| TGME49_320240 | p.Ser73Asn   | missense_variant                               | SAG-related sequence SRS15B          |
| TGME49_320240 | p.Glu61Ala   | missense_variant                               | SAG-related sequence SRS15B          |
| TGME49_320240 | p.Ala58Val   | missense_variant                               | SAG-related sequence SRS15B          |
| TGME49_320240 | p.Phe32Leu   | missense_variant                               | SAG-related sequence SRS15B          |
| TGME49_320240 | c.-70T>G     | 5_prime_UTR_premature_start_codon_gain_variant | SAG-related sequence SRS15B          |
| TGME49_320240 | c.-338C>T    | 5_prime_UTR_premature_start_codon_gain_variant | SAG-related sequence SRS15B          |
| TGME49_320240 | c.-385G>T    | 5_prime_UTR_premature_start_codon_gain_variant | SAG-related sequence SRS15B          |
| TGME49_320240 | c.-528C>T    | 5_prime_UTR_premature_start_codon_gain_variant | SAG-related sequence SRS15B          |
| TGME49_320240 | c.-926A>T    | 5_prime_UTR_premature_start_codon_gain_variant | SAG-related sequence SRS15B          |
| TGME49_320240 | c.-951C>T    | 5_prime_UTR_premature_start_codon_gain_variant | SAG-related sequence SRS15B          |
| TGME49_320230 | p.Gly381Ser  | missense_variant                               | SAG-related sequence SRS15C          |
| TGME49_320230 | p.Ser344Pro  | missense_variant                               | SAG-related sequence SRS15C          |
| TGME49_320230 | p.Asn312Ser  | missense_variant                               | SAG-related sequence SRS15C          |
| TGME49_320230 | p.Ile300Met  | missense_variant                               | SAG-related sequence SRS15C          |
| TGME49_320230 | p.Asn273Ser  | missense_variant                               | SAG-related sequence SRS15C          |
| TGME49_320230 | p.Val252Ile  | missense_variant                               | SAG-related sequence SRS15C          |
| TGME49_320230 | p.Glu198Gln  | missense_variant                               | SAG-related sequence SRS15C          |
| TGME49_320230 | p.Asn174Ser  | missense_variant                               | SAG-related sequence SRS15C          |
| TGME49_320230 | p.Thr166Ala  | missense_variant                               | SAG-related sequence SRS15C          |
| TGME49_320230 | p.Glu164Asp  | missense_variant                               | SAG-related sequence SRS15C          |
| TGME49_320230 | p.Glu164Gly  | missense_variant                               | SAG-related sequence SRS15C          |
| TGME49_320230 | p.Ala144Thr  | missense_variant                               | SAG-related sequence SRS15C          |
| TGME49_320230 | p.Gly124Ser  | missense_variant                               | SAG-related sequence SRS15C          |
| TGME49_320230 | c.-6T>G      | 5_prime_UTR_premature_start_codon_gain_variant | SAG-related sequence SRS15C          |
| TGME49_320200 | p.Ala334Val  | missense_variant                               | SAG-related sequence SRS16A          |
| TGME49_320190 | p.Glu319Ala  | missense_variant                               | SAG-related sequence SRS16B          |
| TGME49_320190 | p.Pro304Ser  | missense_variant                               | SAG-related sequence SRS16B          |
| TGME49_320190 | p.Ala270Gly  | missense_variant                               | SAG-related sequence SRS16B          |
| TGME49_320180 | p.Ala384Thr  | missense_variant                               | SAG-related sequence SRS16C          |
| TGME49_320180 | p.Val374Leu  | missense_variant                               | SAG-related sequence SRS16C          |
| TGME49_320180 | p.Thr334Ile  | missense_variant                               | SAG-related sequence SRS16C          |
| TGME49_320180 | p.Asn239Ile  | missense_variant                               | SAG-related sequence SRS16C          |

|               |             |                                                |                             |
|---------------|-------------|------------------------------------------------|-----------------------------|
| TGME49_320180 | p.Lys210Arg | missense_variant                               | SAG-related sequence SRS16C |
| TGME49_320180 | p.Ala197Thr | missense_variant                               | SAG-related sequence SRS16C |
| TGME49_319360 | p.Val11Ala  | missense_variant                               | SAG-related sequence SRS17A |
| TGME49_319350 | c.-340A>T   | 5_prime_UTR_premature_start_codon_gain_variant | SAG-related sequence SRS17B |
| TGME49_319350 | p.Leu164Arg | missense_variant                               | SAG-related sequence SRS17B |
| TGME49_319350 | p.Ile270Val | missense_variant                               | SAG-related sequence SRS17B |
| TGME49_319350 | p.Gly309Arg | missense_variant                               | SAG-related sequence SRS17B |
| TGME49_319350 | p.Val319Ile | missense_variant                               | SAG-related sequence SRS17B |
| TGME49_319350 | p.Asn346Asp | missense_variant                               | SAG-related sequence SRS17B |
| TGME49_301140 | p.Lys315Arg | missense_variant                               | SAG-related sequence SRS19A |
| TGME49_301140 | p.Asp303Asn | missense_variant                               | SAG-related sequence SRS19A |
| TGME49_301150 | p.Thr372Ala | missense_variant                               | SAG-related sequence SRS19B |
| TGME49_301150 | p.Lys328Gln | missense_variant                               | SAG-related sequence SRS19B |
| TGME49_301150 | p.Asn213Asp | missense_variant                               | SAG-related sequence SRS19B |
| TGME49_301150 | p.Val208Ala | missense_variant                               | SAG-related sequence SRS19B |
| TGME49_301150 | p.Thr205Ile | missense_variant                               | SAG-related sequence SRS19B |
| TGME49_301150 | p.Lys202Asn | missense_variant                               | SAG-related sequence SRS19B |
| TGME49_301150 | p.Lys202Arg | missense_variant                               | SAG-related sequence SRS19B |
| TGME49_301150 | p.Gln200Lys | missense_variant                               | SAG-related sequence SRS19B |
| TGME49_301150 | p.Ala184Val | missense_variant                               | SAG-related sequence SRS19B |
| TGME49_301150 | p.Gly169Glu | missense_variant                               | SAG-related sequence SRS19B |
| TGME49_301150 | p.Gln166Lys | missense_variant                               | SAG-related sequence SRS19B |
| TGME49_301150 | p.Gln165His | missense_variant                               | SAG-related sequence SRS19B |
| TGME49_301150 | p.Glu157Gly | missense_variant                               | SAG-related sequence SRS19B |
| TGME49_301150 | p.Ser145Pro | missense_variant                               | SAG-related sequence SRS19B |
| TGME49_301150 | p.Asp132Glu | missense_variant                               | SAG-related sequence SRS19B |
| TGME49_301150 | p.Arg131Gln | missense_variant                               | SAG-related sequence SRS19B |
| TGME49_301150 | p.Lys129Arg | missense_variant                               | SAG-related sequence SRS19B |
| TGME49_301150 | p.Asn122Lys | missense_variant                               | SAG-related sequence SRS19B |
| TGME49_301150 | p.Gly114Glu | missense_variant                               | SAG-related sequence SRS19B |
| TGME49_301150 | p.Glu113Lys | missense_variant                               | SAG-related sequence SRS19B |
| TGME49_301150 | p.Glu64Gln  | missense_variant                               | SAG-related sequence SRS19B |
| TGME49_301150 | p.Gln36His  | missense_variant                               | SAG-related sequence SRS19B |
| TGME49_301160 | p.Leu396Pro | missense_variant                               | SAG-related sequence SRS19C |
| TGME49_301160 | p.Thr373Ala | missense_variant                               | SAG-related sequence SRS19C |
| TGME49_301160 | p.Thr370Ala | missense_variant                               | SAG-related sequence SRS19C |
| TGME49_301160 | p.Ile291Val | missense_variant                               | SAG-related sequence SRS19C |
| TGME49_301160 | p.Asn210Lys | missense_variant                               | SAG-related sequence SRS19C |
| TGME49_301160 | p.Asn210Ile | missense_variant                               | SAG-related sequence SRS19C |
| TGME49_301160 | p.Ala205Glu | missense_variant                               | SAG-related sequence SRS19C |
| TGME49_301160 | p.Glu201Ala | missense_variant                               | SAG-related sequence SRS19C |
| TGME49_301160 | p.Asp174Asn | missense_variant                               | SAG-related sequence SRS19C |
| TGME49_301160 | p.Ile164Leu | missense_variant                               | SAG-related sequence SRS19C |
| TGME49_301160 | p.Ser140Ala | missense_variant                               | SAG-related sequence SRS19C |
| TGME49_301160 | p.Lys139Arg | missense_variant                               | SAG-related sequence SRS19C |
| TGME49_301160 | p.Asp113Gly | missense_variant                               | SAG-related sequence SRS19C |
| TGME49_301160 | p.Ala78Val  | missense_variant                               | SAG-related sequence SRS19C |
| TGME49_301160 | p.Ser72Thr  | missense_variant                               | SAG-related sequence SRS19C |
| TGME49_301160 | p.Thr70Ile  | missense_variant                               | SAG-related sequence SRS19C |
| TGME49_301160 | p.Gln63Lys  | missense_variant                               | SAG-related sequence SRS19C |
| TGME49_301160 | p.Thr58Ala  | missense_variant                               | SAG-related sequence SRS19C |
| TGME49_301160 | p.Leu57Pro  | missense_variant                               | SAG-related sequence SRS19C |
| TGME49_301160 | p.Gly54Ala  | missense_variant                               | SAG-related sequence SRS19C |
| TGME49_301160 | p.Trp13Gly  | missense_variant                               | SAG-related sequence SRS19C |
| TGME49_301160 | p.Arg8Trp   | missense_variant                               | SAG-related sequence SRS19C |
| TGME49_301170 | p.Leu376Phe | missense_variant                               | SAG-related sequence SRS19D |
| TGME49_301170 | p.Gly359Ala | missense_variant                               | SAG-related sequence SRS19D |
| TGME49_301170 | p.Ala339Thr | missense_variant                               | SAG-related sequence SRS19D |
| TGME49_301170 | p.Asp337Glu | missense_variant                               | SAG-related sequence SRS19D |
| TGME49_301170 | p.Ala336Val | missense_variant                               | SAG-related sequence SRS19D |
| TGME49_301170 | p.His335Asp | missense_variant                               | SAG-related sequence SRS19D |
| TGME49_301170 | p.Glu328Asp | missense_variant                               | SAG-related sequence SRS19D |
| TGME49_301170 | p.Thr307Lys | missense_variant                               | SAG-related sequence SRS19D |
| TGME49_301170 | p.Gln300Leu | missense_variant                               | SAG-related sequence SRS19D |
| TGME49_301170 | p.Gln300Glu | missense_variant                               | SAG-related sequence SRS19D |
| TGME49_301170 | p.Ser299Asn | missense_variant                               | SAG-related sequence SRS19D |
| TGME49_301170 | p.Lys289Arg | missense_variant                               | SAG-related sequence SRS19D |
| TGME49_301170 | p.Pro270Leu | missense_variant                               | SAG-related sequence SRS19D |
| TGME49_301170 | p.Ala201Asp | missense_variant                               | SAG-related sequence SRS19D |
| TGME49_301170 | p.Gly197Arg | missense_variant                               | SAG-related sequence SRS19D |
| TGME49_301170 | p.Lys193Glu | missense_variant                               | SAG-related sequence SRS19D |
| TGME49_301170 | p.Pro183Thr | missense_variant                               | SAG-related sequence SRS19D |
| TGME49_301170 | p.Glu160Gly | missense_variant                               | SAG-related sequence SRS19D |
| TGME49_301170 | p.Glu154Lys | missense_variant                               | SAG-related sequence SRS19D |
| TGME49_301170 | p.Lys152Asn | missense_variant                               | SAG-related sequence SRS19D |
| TGME49_301170 | p.Ser143Thr | missense_variant                               | SAG-related sequence SRS19D |
| TGME49_301170 | p.Glu135Gln | missense_variant                               | SAG-related sequence SRS19D |
| TGME49_301170 | p.Lys127Arg | missense_variant                               | SAG-related sequence SRS19D |
| TGME49_301170 | p.Gly122Asp | missense_variant                               | SAG-related sequence SRS19D |
| TGME49_301170 | p.Arg119Lys | missense_variant                               | SAG-related sequence SRS19D |
| TGME49_301170 | p.Ser110Asn | missense_variant                               | SAG-related sequence SRS19D |
| TGME49_301170 | p.Glu109Lys | missense_variant                               | SAG-related sequence SRS19D |
| TGME49_301170 | p.Val74Ala  | missense_variant                               | SAG-related sequence SRS19D |
| TGME49_301170 | p.Ser73Ala  | missense_variant                               | SAG-related sequence SRS19D |
| TGME49_301170 | p.Thr48Ser  | missense_variant                               | SAG-related sequence SRS19D |

|               |             |                                                |                                                         |
|---------------|-------------|------------------------------------------------|---------------------------------------------------------|
| TGME49_301170 | p.Lys41Thr  | missense_variant                               | SAG-related sequence SRS19D                             |
| TGME49_301170 | p.Pro39Ser  | missense_variant                               | SAG-related sequence SRS19D                             |
| TGME49_301170 | p.Glu36Gln  | missense_variant                               | SAG-related sequence SRS19D                             |
| TGME49_301170 | c.-53C>T    | 5_prime_UTR_premature_start_codon_gain_variant | SAG-related sequence SRS19D                             |
| TGME49_301180 | p.Ser333Leu | missense_variant                               | SAG-related sequence SRS19F                             |
| TGME49_301180 | p.Gln304Leu | missense_variant                               | SAG-related sequence SRS19F                             |
| TGME49_301180 | p.Gln304Glu | missense_variant                               | SAG-related sequence SRS19F                             |
| TGME49_301180 | p.Gly303Asp | missense_variant                               | SAG-related sequence SRS19F                             |
| TGME49_301180 | p.Lys293Arg | missense_variant                               | SAG-related sequence SRS19F                             |
| TGME49_301180 | p.Pro274Leu | missense_variant                               | SAG-related sequence SRS19F                             |
| TGME49_301180 | p.Ala265Thr | missense_variant                               | SAG-related sequence SRS19F                             |
| TGME49_301180 | p.Met263Val | missense_variant                               | SAG-related sequence SRS19F                             |
| TGME49_301180 | p.Ile227Val | missense_variant                               | SAG-related sequence SRS19F                             |
| TGME49_301180 | p.Glu223Lys | missense_variant                               | SAG-related sequence SRS19F                             |
| TGME49_301180 | p.Glu217Lys | missense_variant                               | SAG-related sequence SRS19F                             |
| TGME49_301180 | p.Gln198Leu | missense_variant                               | SAG-related sequence SRS19F                             |
| TGME49_301180 | p.Gln198Glu | missense_variant                               | SAG-related sequence SRS19F                             |
| TGME49_301180 | p.Thr186Met | missense_variant                               | SAG-related sequence SRS19F                             |
| TGME49_301180 | p.Ala173Thr | missense_variant                               | SAG-related sequence SRS19F                             |
| TGME49_301180 | p.Asn170Lys | missense_variant                               | SAG-related sequence SRS19F                             |
| TGME49_301180 | p.Asn170Asp | missense_variant                               | SAG-related sequence SRS19F                             |
| TGME49_301180 | p.Val161Ala | missense_variant                               | SAG-related sequence SRS19F                             |
| TGME49_301180 | p.Ala141Gly | missense_variant                               | SAG-related sequence SRS19F                             |
| TGME49_301180 | p.Thr139Ser | missense_variant                               | SAG-related sequence SRS19F                             |
| TGME49_301180 | p.Ser124Arg | missense_variant                               | SAG-related sequence SRS19F                             |
| TGME49_301180 | p.Glu116Gly | missense_variant                               | SAG-related sequence SRS19F                             |
| TGME49_301180 | p.Arg113Pro | missense_variant                               | SAG-related sequence SRS19F                             |
| TGME49_301180 | p.Gly96Glu  | missense_variant                               | SAG-related sequence SRS19F                             |
| TGME49_301180 | p.Glu81Gly  | missense_variant                               | SAG-related sequence SRS19F                             |
| TGME49_301180 | p.Thr69Ala  | missense_variant                               | SAG-related sequence SRS19F                             |
| TGME49_301180 | p.Gln64Glu  | missense_variant                               | SAG-related sequence SRS19F                             |
| TGME49_301180 | p.Asp57Asn  | missense_variant                               | SAG-related sequence SRS19F                             |
| TGME49_301180 | p.Gly54Ser  | missense_variant                               | SAG-related sequence SRS19F                             |
| TGME49_301180 | p.Gly48Arg  | missense_variant                               | SAG-related sequence SRS19F                             |
| TGME49_301180 | c.-53G>A    | 5_prime_UTR_premature_start_codon_gain_variant | SAG-related sequence SRS19F                             |
| TGME49_238460 | p.Ile88Met  | missense_variant                               | SAG-related sequence SRS22B                             |
| TGME49_238460 | p.Pro63Thr  | missense_variant                               | SAG-related sequence SRS22B                             |
| TGME49_239090 | p.Thr252Ala | missense_variant                               | SAG-related sequence SRS23                              |
| TGME49_239090 | p.Lys131Arg | missense_variant                               | SAG-related sequence SRS23                              |
| TGME49_224790 | p.Gln373His | missense_variant                               | SAG-related sequence SRS40A                             |
| TGME49_224790 | p.Thr363Met | missense_variant                               | SAG-related sequence SRS40A                             |
| TGME49_224790 | p.Ala305Thr | missense_variant                               | SAG-related sequence SRS40A                             |
| TGME49_224790 | p.Glu159Lys | missense_variant                               | SAG-related sequence SRS40A                             |
| TGME49_224790 | p.Ser113Asn | missense_variant                               | SAG-related sequence SRS40A                             |
| TGME49_224790 | p.Lys80Arg  | missense_variant                               | SAG-related sequence SRS40A                             |
| TGME49_224790 | p.Lys66Gln  | missense_variant                               | SAG-related sequence SRS40A                             |
| TGME49_224790 | c.-279C>G   | 5_prime_UTR_premature_start_codon_gain_variant | SAG-related sequence SRS40A                             |
| TGME49_224790 | c.-1011A>G  | 5_prime_UTR_premature_start_codon_gain_variant | SAG-related sequence SRS40A                             |
| TGME49_224770 | p.Gly199Ala | missense_variant                               | SAG-related sequence SRS40D                             |
| TGME49_224770 | p.Ser136Pro | missense_variant                               | SAG-related sequence SRS40D                             |
| TGME49_224770 | p.Ala135Asp | missense_variant                               | SAG-related sequence SRS40D                             |
| TGME49_224770 | p.Asn132Ser | missense_variant                               | SAG-related sequence SRS40D                             |
| TGME49_224760 | p.Met280Ile | missense_variant                               | SAG-related sequence SRS40E                             |
| TGME49_224760 | p.Gln176Lys | missense_variant                               | SAG-related sequence SRS40E                             |
| TGME49_224760 | p.Asp136Asn | missense_variant                               | SAG-related sequence SRS40E                             |
| TGME49_224760 | c.-102T>G   | 5_prime_UTR_premature_start_codon_gain_variant | SAG-related sequence SRS40E                             |
| TGME49_224750 | p.Glu267Lys | missense_variant                               | SAG-related sequence SRS40F                             |
| TGME49_224750 | p.Asn224Asp | missense_variant                               | SAG-related sequence SRS40F                             |
| TGME49_224750 | p.Ser199Ala | missense_variant                               | SAG-related sequence SRS40F                             |
| TGME49_224750 | p.Gln196Arg | missense_variant                               | SAG-related sequence SRS40F                             |
| TGME49_224750 | p.Ala194Gly | missense_variant                               | SAG-related sequence SRS40F                             |
| TGME49_224750 | p.Asn128Lys | missense_variant                               | SAG-related sequence SRS40F                             |
| TGME49_224750 | p.Gln60His  | missense_variant                               | SAG-related sequence SRS40F                             |
| TGME49_224750 | p.Gln56Glu  | missense_variant                               | SAG-related sequence SRS40F                             |
| TGME49_224750 | p.Gly53Ala  | missense_variant                               | SAG-related sequence SRS40F                             |
| TGME49_234930 | p.Ala374Thr | missense_variant                               | SAG-related sequence SRS43                              |
| TGME49_234930 | p.Asp117Asn | missense_variant                               | SAG-related sequence SRS43                              |
| TGME49_234930 | p.Gln104His | missense_variant                               | SAG-related sequence SRS43                              |
| TGME49_234930 | p.Ala58Gly  | missense_variant                               | SAG-related sequence SRS43                              |
| TGME49_207010 | p.Pro119Arg | missense_variant                               | SAG-related sequence SRS48K                             |
| TGME49_207150 | p.Asn108Lys | missense_variant                               | SAG-related sequence SRS49C                             |
| TGME49_207150 | p.Leu15Val  | missense_variant                               | SAG-related sequence SRS49C                             |
| TGME49_207160 | p.Ala100Thr | missense_variant                               | SAG-related sequence SRS49D                             |
| TGME49_308020 | c.-248T>G   | 5_prime_UTR_premature_start_codon_gain_variant | SAG-related sequence SRS57                              |
| TGME49_308020 | c.-447G>T   | 5_prime_UTR_premature_start_codon_gain_variant | SAG-related sequence SRS57                              |
| TGME49_279000 | p.Pro69Gln  | missense_variant                               | SAG-related sequence SRS59J                             |
| TGME49_279000 | c.-279C>T   | 5_prime_UTR_premature_start_codon_gain_variant | SAG-related sequence SRS59J                             |
| TGME49_251962 | p.Lys386Gln | missense_variant                               | SAG-related sequence SRS59K                             |
| TGME49_224170 | p.Lys160Gln | missense_variant                               | SAG-related sequence SRS60A                             |
| TGME49_224170 | p.Ala227Ser | missense_variant                               | SAG-related sequence SRS60A                             |
| TGME49_252320 | p.Ser158Arg | missense_variant                               | Sas10/Utp3/C1D family protein                           |
| TGME49_222960 | c.-174C>T   | 5_prime_UTR_premature_start_codon_gain_variant | SCY kinase-related protein (incomplete catalytic triad) |
| TGME49_222960 | p.Ala569Ser | missense_variant                               | SCY kinase-related protein (incomplete catalytic triad) |
| TGME49_222960 | p.His799Gln | missense_variant                               | SCY kinase-related protein (incomplete catalytic triad) |
| TGME49_217780 | c.*542G>C   | splice_region_variant                          | Sec20 protein                                           |



|               |                  |                                                |                                                                        |
|---------------|------------------|------------------------------------------------|------------------------------------------------------------------------|
| TGME49_217780 | p.Arg805His      | missense_variant                               | Sec20 protein                                                          |
| TGME49_217780 | p.Ala555Ser      | missense_variant                               | Sec20 protein                                                          |
| TGME49_217780 | p.Leu484Pro      | missense_variant                               | Sec20 protein                                                          |
| TGME49_217780 | c.1329+7T>C      | splice_region_variant                          | Sec20 protein                                                          |
| TGME49_217780 | p.Ser340Asn      | missense_variant                               | Sec20 protein                                                          |
| TGME49_217780 | c.-310A>G        | 5_prime_UTR_premature_start_codon_gain_variant | Sec20 protein                                                          |
| TGME49_217780 | c.-571C>T        | 5_prime_UTR_premature_start_codon_gain_variant | Sec20 protein                                                          |
| TGME49_217780 | c.-1810A>G       | 5_prime_UTR_premature_start_codon_gain_variant | Sec20 protein                                                          |
| TGME49_217780 | c.-2083G>C       | 5_prime_UTR_premature_start_codon_gain_variant | Sec20 protein                                                          |
| TGME49_235700 | p.Ser290Thr      | missense_variant                               | sedoheptulose-1,7-bisphosphatase                                       |
| TGME49_254490 | p.Ala61Val       | missense_variant                               | Sel1 repeat-containing protein                                         |
| TGME49_254490 | p.Arg64Gln       | missense_variant                               | Sel1 repeat-containing protein                                         |
| TGME49_254490 | p.Gly118Arg      | missense_variant                               | Sel1 repeat-containing protein                                         |
| TGME49_254490 | p.His1100Asn     | missense_variant                               | Sel1 repeat-containing protein                                         |
| TGME49_254490 | c.*1565C>T       | splice_region_variant                          | Sel1 repeat-containing protein                                         |
| TGME49_301430 | p.Asp35Gly       | missense_variant                               | septum formation protein maf, putative                                 |
| TGME49_301430 | p.Ala169Glu      | missense_variant&splice_region_variant         | septum formation protein maf, putative                                 |
| TGME49_301430 | p.Ser234Gly      | missense_variant                               | septum formation protein maf, putative                                 |
| TGME49_301430 | p.Ter391Glnext*? | stop_lost                                      | septum formation protein maf, putative                                 |
| TGME49_222840 | p.Arg68Gly       | missense_variant                               | Ser/Thr phosphatase family protein                                     |
| TGME49_297650 | c.1574-6T>G      | splice_region_variant                          | Ser/Thr phosphatase family protein                                     |
| TGME49_297650 | p.Lys476Asn      | missense_variant                               | Ser/Thr phosphatase family protein                                     |
| TGME49_297650 | c.874+6C>T       | splice_region_variant                          | Ser/Thr phosphatase family protein                                     |
| TGME49_297650 | p.Ser24Pro       | missense_variant                               | Ser/Thr phosphatase family protein                                     |
| TGME49_297650 | c.-157T>C        | 5_prime_UTR_premature_start_codon_gain_variant | Ser/Thr phosphatase family protein                                     |
| TGME49_254770 | p.Arg363Thr      | missense_variant                               | Ser/Thr phosphatase family protein                                     |
| TGME49_238230 | c.-798A>T        | 5_prime_UTR_premature_start_codon_gain_variant | Ser/Thr phosphatase family protein                                     |
| TGME49_238230 | c.-479C>T        | 5_prime_UTR_premature_start_codon_gain_variant | Ser/Thr phosphatase family protein                                     |
| TGME49_254010 | p.Val254Ala      | missense_variant                               | serine carboxypeptidase s28 protein                                    |
| TGME49_254010 | c.1123+4G>T      | splice_region_variant                          | serine carboxypeptidase s28 protein                                    |
| TGME49_254010 | p.Glu504Lys      | missense_variant                               | serine carboxypeptidase s28 protein                                    |
| TGME49_254010 | c.1667-7T>C      | splice_region_variant                          | serine carboxypeptidase s28 protein                                    |
| TGME49_254010 | p.Gly684Arg      | missense_variant                               | serine carboxypeptidase s28 protein                                    |
| TGME49_254010 | p.Ala703Gly      | missense_variant                               | serine carboxypeptidase s28 protein                                    |
| TGME49_254710 | p.Ala656Thr      | missense_variant                               | serine esterase (DUF676) protein                                       |
| TGME49_254710 | c.-695T>G        | 5_prime_UTR_premature_start_codon_gain_variant | serine esterase (DUF676) protein                                       |
| TGME49_234190 | p.Ala593Val      | missense_variant                               | serine hydroxymethyltransferase 2, putative                            |
| TGME49_234190 | p.Ile580Val      | missense_variant                               | serine hydroxymethyltransferase 2, putative                            |
| TGME49_251850 | c.-958C>T        | 5_prime_UTR_premature_start_codon_gain_variant | serine/threonine protein phosphatase                                   |
| TGME49_301010 | c.-1359C>G       | 5_prime_UTR_premature_start_codon_gain_variant | serine/threonine protein phosphatase, putative                         |
| TGME49_223985 | p.Pro1555Arg     | missense_variant                               | serine/threonine specific protein phosphatase                          |
| TGME49_223985 | p.Leu227Phe      | missense_variant                               | serine/threonine specific protein phosphatase                          |
| TGME49_223985 | p.Phe215Leu      | missense_variant                               | serine/threonine specific protein phosphatase                          |
| TGME49_223985 | p.Asn211Ser      | missense_variant                               | serine/threonine specific protein phosphatase                          |
| TGME49_223985 | p.Ala4Ser        | missense_variant                               | serine/threonine specific protein phosphatase                          |
| TGME49_223985 | c.-2368A>C       | 5_prime_UTR_premature_start_codon_gain_variant | serine/threonine specific protein phosphatase                          |
| TGME49_224220 | c.-501C>T        | 5_prime_UTR_premature_start_codon_gain_variant | serine/threonine-protein phosphatase PP2A catalytic subunit            |
| TGME49_218880 | c.-1095C>T       | 5_prime_UTR_premature_start_codon_gain_variant | SF-assembly, putative                                                  |
| TGME49_280740 | c.-38C>T         | 5_prime_UTR_premature_start_codon_gain_variant | signal peptidase                                                       |
| TGME49_214090 | p.Leu882Phe      | missense_variant                               | signal peptidase                                                       |
| TGME49_214090 | p.Glu1216Asp     | missense_variant                               | signal peptidase                                                       |
| TGME49_214090 | p.Asn1356Ser     | missense_variant                               | signal peptidase                                                       |
| TGME49_300060 | c.-34C>T         | 5_prime_UTR_premature_start_codon_gain_variant | signal peptidase subunit protein                                       |
| TGME49_236130 | c.-184T>G        | 5_prime_UTR_premature_start_codon_gain_variant | signal recognition particle (SRP9) domain-containing protein           |
| TGME49_236130 | c.358-5T>C       | splice_region_variant                          | signal recognition particle (SRP9) domain-containing protein           |
| TGME49_236130 | c.556+6A>G       | splice_region_variant                          | signal recognition particle (SRP9) domain-containing protein           |
| TGME49_280610 | c.-380A>T        | 5_prime_UTR_premature_start_codon_gain_variant | signal recognition particle receptor alpha subunit                     |
| TGME49_280610 | c.-223C>T        | 5_prime_UTR_premature_start_codon_gain_variant | signal recognition particle receptor alpha subunit                     |
| TGME49_297940 | p.Ser548Thr      | missense_variant                               | single-strand binding protein                                          |
| TGME49_297940 | p.Ala354Thr      | missense_variant                               | single-strand binding protein                                          |
| TGME49_297940 | p.Ser284Pro      | missense_variant                               | single-strand binding protein                                          |
| TGME49_297940 | p.Thr69Ala       | missense_variant                               | single-strand binding protein                                          |
| TGME49_212260 | p.Leu184Arg      | missense_variant                               | Sjogren's syndrome/scleroderma autoantigen 1 (Autoantigen p27) protein |
| TGME49_251630 | p.Leu43Val       | missense_variant                               | slc30a2 protein                                                        |
| TGME49_251630 | p.Arg97Ser       | missense_variant                               | slc30a2 protein                                                        |
| TGME49_251630 | p.Val173Leu      | missense_variant                               | slc30a2 protein                                                        |
| TGME49_251630 | p.Arg290Thr      | missense_variant                               | slc30a2 protein                                                        |
| TGME49_251630 | p.Ala308Ser      | missense_variant                               | slc30a2 protein                                                        |
| TGME49_251630 | p.Ala308Val      | missense_variant                               | slc30a2 protein                                                        |
| TGME49_251630 | p.Gly352Val      | missense_variant                               | slc30a2 protein                                                        |
| TGME49_251630 | p.Ser423Asn      | missense_variant                               | slc30a2 protein                                                        |
| TGME49_251630 | p.Leu424His      | missense_variant                               | slc30a2 protein                                                        |
| TGME49_214770 | c.87+6T>G        | splice_region_variant                          | small GTP binding protein rab1a, putative                              |
| TGME49_247610 | c.-74T>G         | 5_prime_UTR_premature_start_codon_gain_variant | small nuclear ribonucleoprotein E, putative                            |
| TGME49_248870 | p.Ala18Thr       | missense_variant                               | SNARE associated Golgi protein                                         |
| TGME49_248870 | p.Leu36Ile       | missense_variant                               | SNARE associated Golgi protein                                         |
| TGME49_301350 | c.-2312C>T       | 5_prime_UTR_premature_start_codon_gain_variant | SNARE associated protein                                               |
| TGME49_301350 | c.-965C>T        | 5_prime_UTR_premature_start_codon_gain_variant | SNARE associated protein                                               |
| TGME49_301350 | p.Pro22Ser       | missense_variant                               | SNARE associated protein                                               |
| TGME49_301350 | p.Pro402Leu      | missense_variant                               | SNARE associated protein                                               |
| TGME49_301350 | p.Val411Ile      | missense_variant                               | SNARE associated protein                                               |
| TGME49_248310 | c.-525G>T        | 5_prime_UTR_premature_start_codon_gain_variant | SNF7 family protein                                                    |
| TGME49_208420 | p.Lys393Asn      | missense_variant                               | Sodium:neurotransmitter symporter family protein                       |
| TGME49_299060 | c.-18G>T         | 5_prime_UTR_premature_start_codon_gain_variant | sodium/hydrogen exchanger NHE2                                         |
| TGME49_299060 | p.Glu482Asp      | missense_variant                               | sodium/hydrogen exchanger NHE2                                         |

|               |              |                                                |                                                                             |
|---------------|--------------|------------------------------------------------|-----------------------------------------------------------------------------|
| TGME49_222210 | c.-186A>G    | 5_prime_UTR_premature_start_codon_gain_variant | SPFH domain / Band 7 family protein                                         |
| TGME49_237200 | c.-440A>G    | 5_prime_UTR_premature_start_codon_gain_variant | sphingolipid delta 4 desaturase/c-4 hydroxylase protein des2 family protein |
| TGME49_319530 | c.-395T>G    | 5_prime_UTR_premature_start_codon_gain_variant | splicing factor SF2                                                         |
| TGME49_224720 | p.Ala670Ser  | missense_variant                               | SPOC domain-containing protein                                              |
| TGME49_224720 | p.Thr625Ile  | missense_variant                               | SPOC domain-containing protein                                              |
| TGME49_224720 | p.Glu589Asp  | missense_variant                               | SPOC domain-containing protein                                              |
| TGME49_224720 | p.Ala88Gly   | missense_variant                               | SPOC domain-containing protein                                              |
| TGME49_246020 | p.Ala310Ser  | missense_variant                               | SprT domain-containing protein                                              |
| TGME49_246020 | p.Lys491Thr  | missense_variant                               | SprT domain-containing protein                                              |
| TGME49_221450 | c.-253C>G    | 5_prime_UTR_premature_start_codon_gain_variant | SPRY domain-containing protein                                              |
| TGME49_221450 | p.Gln109Pro  | missense_variant                               | SPRY domain-containing protein                                              |
| TGME49_248550 | c.2320-6G>A  | splice_region_variant                          | SPX domain-containing protein                                               |
| TGME49_275802 | p.Thr728Ala  | missense_variant                               | SRP72 RNA-binding domain-containing protein                                 |
| TGME49_275802 | p.Met471Val  | missense_variant                               | SRP72 RNA-binding domain-containing protein                                 |
| TGME49_248780 | p.Gly29Val   | missense_variant                               | SRR1 protein                                                                |
| TGME49_248780 | p.Thr65Ile   | missense_variant                               | SRR1 protein                                                                |
| TGME49_248780 | p.Ala130Pro  | missense_variant                               | SRR1 protein                                                                |
| TGME49_248780 | p.Asn458Lys  | missense_variant                               | SRR1 protein                                                                |
| TGME49_248780 | p.Glu562Lys  | missense_variant                               | SRR1 protein                                                                |
| TGME49_248780 | p.Ala598Val  | missense_variant                               | SRR1 protein                                                                |
| TGME49_248780 | p.Trp751Ser  | missense_variant                               | SRR1 protein                                                                |
| TGME49_236660 | p.Glu900Lys  | missense_variant                               | START domain-containing protein                                             |
| TGME49_319970 | p.Thr80Ile   | missense_variant                               | subtilisin SUB10                                                            |
| TGME49_319970 | c.1288-4T>G  | splice_region_variant                          | subtilisin SUB10                                                            |
| TGME49_235860 | p.Tyr189Asp  | missense_variant                               | subtilisin SUB11                                                            |
| TGME49_235860 | p.Val220Ala  | missense_variant                               | subtilisin SUB11                                                            |
| TGME49_235860 | c.1852+6G>A  | splice_region_variant                          | subtilisin SUB11                                                            |
| TGME49_221830 | c.1338+7G>A  | splice_region_variant                          | subtilisin SUB12                                                            |
| TGME49_221830 | p.Asn143Ser  | missense_variant                               | subtilisin SUB12                                                            |
| TGME49_200350 | p.Leu437Phe  | missense_variant                               | subtilisin SUB3                                                             |
| TGME49_240240 | p.Ser54Cys   | missense_variant                               | subtilisin SUB5                                                             |
| TGME49_240240 | p.Pro216Leu  | missense_variant                               | subtilisin SUB5                                                             |
| TGME49_240240 | p.Pro413Leu  | missense_variant                               | subtilisin SUB5                                                             |
| TGME49_240240 | p.Gly715Arg  | missense_variant                               | subtilisin SUB5                                                             |
| TGME49_240240 | p.Ala1003Pro | missense_variant                               | subtilisin SUB5                                                             |
| TGME49_248470 | c.1315-4G>A  | splice_region_variant                          | subtilisin SUB6                                                             |
| TGME49_235950 | p.Met98Leu   | missense_variant                               | subtilisin SUB8                                                             |
| TGME49_235950 | p.Ala115Val  | missense_variant                               | subtilisin SUB8                                                             |
| TGME49_235950 | p.Glu554Asp  | missense_variant                               | subtilisin SUB8                                                             |
| TGME49_235950 | p.Ser717Thr  | missense_variant                               | subtilisin SUB8                                                             |
| TGME49_251760 | c.652-6T>C   | splice_region_variant                          | subunit of proteasome activator complex, putative                           |
| TGME49_251760 | c.186+7G>A   | splice_region_variant                          | subunit of proteasome activator complex, putative                           |
| TGME49_215280 | c.400+5G>T   | splice_region_variant                          | succinate dehydrogenase [ubiquinone] iron-sulfur protein                    |
| TGME49_217850 | c.924+8C>T   | splice_region_variant                          | Sucrose-6F-phosphate phosphohydrolase                                       |
| TGME49_217850 | c.717-5T>C   | splice_region_variant                          | Sucrose-6F-phosphate phosphohydrolase                                       |
| TGME49_246500 | p.Thr518Ala  | missense_variant                               | surp module domain-containing protein                                       |
| TGME49_211270 | p.Asn3882Thr | missense_variant                               | sushi domain (scr repeat) domain-containing protein                         |
| TGME49_211270 | p.Leu3879Ser | missense_variant                               | sushi domain (scr repeat) domain-containing protein                         |
| TGME49_211270 | p.Arg3754Trp | missense_variant                               | sushi domain (scr repeat) domain-containing protein                         |
| TGME49_211270 | p.Tyr3620Ser | missense_variant                               | sushi domain (scr repeat) domain-containing protein                         |
| TGME49_211270 | p.Pro3558Leu | missense_variant                               | sushi domain (scr repeat) domain-containing protein                         |
| TGME49_211270 | p.Pro3368Leu | missense_variant                               | sushi domain (scr repeat) domain-containing protein                         |
| TGME49_211270 | p.Ser1243Leu | missense_variant                               | sushi domain (scr repeat) domain-containing protein                         |
| TGME49_211270 | p.Ala1161Thr | missense_variant                               | sushi domain (scr repeat) domain-containing protein                         |
| TGME49_211270 | p.Gly524Arg  | missense_variant                               | sushi domain (scr repeat) domain-containing protein                         |
| TGME49_223480 | p.Ser2Phe    | missense_variant                               | sushi domain (scr repeat) domain-containing protein                         |
| TGME49_223480 | p.Asp18Gly   | missense_variant                               | sushi domain (scr repeat) domain-containing protein                         |
| TGME49_223480 | p.Ser651Ala  | missense_variant                               | sushi domain (scr repeat) domain-containing protein                         |
| TGME49_223480 | p.Val1864Ile | missense_variant                               | sushi domain (scr repeat) domain-containing protein                         |
| TGME49_223480 | p.Glu2121Gly | missense_variant                               | sushi domain (scr repeat) domain-containing protein                         |
| TGME49_223480 | p.Val2315Met | missense_variant                               | sushi domain (scr repeat) domain-containing protein                         |
| TGME49_223480 | p.Thr3254Arg | missense_variant                               | sushi domain (scr repeat) domain-containing protein                         |
| TGME49_223480 | p.Ser3437Leu | missense_variant                               | sushi domain (scr repeat) domain-containing protein                         |
| TGME49_223480 | p.Thr3743Arg | missense_variant                               | sushi domain (scr repeat) domain-containing protein                         |
| TGME49_223480 | p.Gln3961His | missense_variant                               | sushi domain (scr repeat) domain-containing protein                         |
| TGME49_320300 | c.3384-6T>C  | splice_region_variant                          | SWI2/SNF2 Brahma-like putative                                              |
| TGME49_320300 | p.Glu624Asp  | missense_variant                               | SWI2/SNF2 Brahma-like putative                                              |
| TGME49_320300 | p.Ser615Ile  | missense_variant                               | SWI2/SNF2 Brahma-like putative                                              |
| TGME49_320300 | c.-982C>T    | 5_prime_UTR_premature_start_codon_gain_variant | SWI2/SNF2 Brahma-like putative                                              |
| TGME49_320300 | c.-1525G>T   | 5_prime_UTR_premature_start_codon_gain_variant | SWI2/SNF2 Brahma-like putative                                              |
| TGME49_278440 | c.-261C>T    | 5_prime_UTR_premature_start_codon_gain_variant | SWI2/SNF2 Brahma-like putative                                              |
| TGME49_278440 | p.Gly93Arg   | missense_variant                               | SWI2/SNF2 Brahma-like putative                                              |
| TGME49_278440 | p.Pro863Leu  | missense_variant                               | SWI2/SNF2 Brahma-like putative                                              |
| TGME49_278440 | p.Leu1863Val | missense_variant                               | SWI2/SNF2 Brahma-like putative                                              |
| TGME49_278440 | c.6219+6C>T  | splice_region_variant                          | SWI2/SNF2 Brahma-like putative                                              |
| TGME49_278440 | c.6370-4A>G  | splice_region_variant                          | SWI2/SNF2 Brahma-like putative                                              |
| TGME49_278440 | p.Pro2255Gln | missense_variant                               | SWI2/SNF2 Brahma-like putative                                              |
| TGME49_280800 | p.Ser2111Cys | missense_variant                               | SWI2/SNF2 SRCAP/Ino80                                                       |
| TGME49_280800 | c.4658+8A>C  | splice_region_variant                          | SWI2/SNF2 SRCAP/Ino80                                                       |
| TGME49_280800 | p.Leu912Pro  | missense_variant                               | SWI2/SNF2 SRCAP/Ino80                                                       |
| TGME49_280800 | c.-741C>T    | 5_prime_UTR_premature_start_codon_gain_variant | SWI2/SNF2 SRCAP/Ino80                                                       |
| TGME49_280800 | c.-996A>G    | 5_prime_UTR_premature_start_codon_gain_variant | SWI2/SNF2 SRCAP/Ino80                                                       |
| TGME49_236970 | p.Ala649Thr  | missense_variant                               | SWI2/SNF2-containing PHD finger protein                                     |
| TGME49_236970 | p.Ala2180Ser | missense_variant                               | SWI2/SNF2-containing PHD finger protein                                     |
| TGME49_245720 | p.Pro810Ser  | missense_variant                               | SWI2/SNF2-containing protein                                                |

|               |              |                                                |                                                                |
|---------------|--------------|------------------------------------------------|----------------------------------------------------------------|
| TGME49_245720 | p.Pro810Leu  | missense_variant                               | SWI2/SNF2-containing protein                                   |
| TGME49_245720 | p.Pro1080Gln | missense_variant                               | SWI2/SNF2-containing protein                                   |
| TGME49_245720 | p.Phe1630Leu | missense_variant                               | SWI2/SNF2-containing protein                                   |
| TGME49_245720 | p.Leu2236Arg | missense_variant                               | SWI2/SNF2-containing protein                                   |
| TGME49_245720 | p.Gly2707Asp | missense_variant                               | SWI2/SNF2-containing protein                                   |
| TGME49_245720 | c.8781+7T>C  | splice_region_variant                          | SWI2/SNF2-containing protein                                   |
| TGME49_245720 | p.Cys3108*   | stop_gained                                    | SWI2/SNF2-containing protein                                   |
| TGME49_277070 | c.-2240C>T   | 5_prime_UTR_premature_start_codon_gain_variant | SWI2/SNF2-containing protein                                   |
| TGME49_277070 | p.Gly164Cys  | missense_variant                               | SWI2/SNF2-containing protein                                   |
| TGME49_277070 | p.Gly892Glu  | missense_variant                               | SWI2/SNF2-containing protein                                   |
| TGME49_277070 | p.Gly902Arg  | missense_variant                               | SWI2/SNF2-containing protein                                   |
| TGME49_318480 | c.-267C>T    | 5_prime_UTR_premature_start_codon_gain_variant | SWI2/SNF2-containing protein RAD5                              |
| TGME49_318480 | p.Gly1426Val | missense_variant                               | SWI2/SNF2-containing protein RAD5                              |
| TGME49_248100 | c.-2984T>G   | 5_prime_UTR_premature_start_codon_gain_variant | synaptobrevin protein                                          |
| TGME49_248100 | c.459+6A>G   | splice_region_variant                          | synaptobrevin protein                                          |
| TGME49_297500 | c.1423+6A>C  | splice_region_variant                          | T-complex protein 1 eta subunit                                |
| TGME49_297500 | c.453-6C>T   | splice_region_variant                          | T-complex protein 1 eta subunit                                |
| TGME49_297500 | c.-405C>G    | 5_prime_UTR_premature_start_codon_gain_variant | T-complex protein 1 eta subunit                                |
| TGME49_218250 | c.964-4A>G   | splice_region_variant                          | TAP42 family protein                                           |
| TGME49_218250 | p.Gly46Cys   | missense_variant                               | TAP42 family protein                                           |
| TGME49_250680 | p.Arg877His  | missense_variant                               | TBC domain-containing kinase (incomplete catalytic triad)      |
| TGME49_250680 | p.Met859Val  | missense_variant                               | TBC domain-containing kinase (incomplete catalytic triad)      |
| TGME49_250680 | p.Ala768Ser  | missense_variant                               | TBC domain-containing kinase (incomplete catalytic triad)      |
| TGME49_250680 | p.Val703Met  | missense_variant                               | TBC domain-containing kinase (incomplete catalytic triad)      |
| TGME49_221710 | p.Phe174Ser  | missense_variant                               | TBC domain-containing protein                                  |
| TGME49_239830 | p.Val981Ile  | missense_variant                               | TBC domain-containing protein                                  |
| TGME49_239830 | p.Val1162Ala | missense_variant                               | TBC domain-containing protein                                  |
| TGME49_218870 | p.Ser38Pro   | missense_variant                               | TBC domain-containing protein                                  |
| TGME49_217660 | p.Val22Leu   | missense_variant                               | Tctex-1 family protein                                         |
| TGME49_278790 | c.-242C>T    | 5_prime_UTR_premature_start_codon_gain_variant | Tctex2-related light chain                                     |
| TGME49_278790 | p.Leu55Ile   | missense_variant                               | Tctex2-related light chain                                     |
| TGME49_254840 | p.Thr397Ser  | missense_variant                               | tetratricopeptide repeat-containing protein                    |
| TGME49_254840 | p.Glu357Asp  | missense_variant                               | tetratricopeptide repeat-containing protein                    |
| TGME49_254840 | c.-446T>G    | 5_prime_UTR_premature_start_codon_gain_variant | tetratricopeptide repeat-containing protein                    |
| TGME49_254840 | c.-2032A>G   | 5_prime_UTR_premature_start_codon_gain_variant | tetratricopeptide repeat-containing protein                    |
| TGME49_254840 | c.-2937G>A   | 5_prime_UTR_premature_start_codon_gain_variant | tetratricopeptide repeat-containing protein                    |
| TGME49_254840 | c.-3201A>G   | 5_prime_UTR_premature_start_codon_gain_variant | tetratricopeptide repeat-containing protein                    |
| TGME49_211370 | p.Cys55Ser   | missense_variant                               | tetratricopeptide repeat-containing protein                    |
| TGME49_211370 | p.Cys55Phe   | missense_variant                               | tetratricopeptide repeat-containing protein                    |
| TGME49_211370 | p.His360Gln  | missense_variant                               | tetratricopeptide repeat-containing protein                    |
| TGME49_211370 | p.Ala393Thr  | missense_variant                               | tetratricopeptide repeat-containing protein                    |
| TGME49_223710 | p.Glu862Asp  | missense_variant                               | tetratricopeptide repeat-containing protein                    |
| TGME49_247000 | p.Leu4Val    | missense_variant                               | tetratricopeptide repeat-containing protein                    |
| TGME49_247000 | p.Lys136Asn  | missense_variant                               | tetratricopeptide repeat-containing protein                    |
| TGME49_247000 | p.Glu653Asp  | missense_variant                               | tetratricopeptide repeat-containing protein                    |
| TGME49_247000 | p.Gln741Arg  | missense_variant                               | tetratricopeptide repeat-containing protein                    |
| TGME49_251410 | p.Ala1659Thr | missense_variant                               | tetratricopeptide repeat-containing protein                    |
| TGME49_251410 | p.Pro1051Ser | missense_variant                               | tetratricopeptide repeat-containing protein                    |
| TGME49_251410 | p.Glu1027Lys | missense_variant                               | tetratricopeptide repeat-containing protein                    |
| TGME49_251410 | p.Ala262Ser  | missense_variant                               | tetratricopeptide repeat-containing protein                    |
| TGME49_251410 | p.Leu63Pro   | missense_variant                               | tetratricopeptide repeat-containing protein                    |
| TGME49_251410 | c.-10G>T     | 5_prime_UTR_premature_start_codon_gain_variant | tetratricopeptide repeat-containing protein                    |
| TGME49_278630 | p.Met134Val  | missense_variant                               | tetratricopeptide repeat-containing protein                    |
| TGME49_276960 | p.Asn84Lys   | missense_variant                               | tetratricopeptide repeat-containing protein                    |
| TGME49_215250 | p.Glu140Gly  | missense_variant                               | thiamin pyrophosphokinase, catalytic domain-containing protein |
| TGME49_215250 | p.Pro339Gln  | missense_variant                               | thiamin pyrophosphokinase, catalytic domain-containing protein |
| TGME49_212100 | c.-1633C>T   | 5_prime_UTR_premature_start_codon_gain_variant | ThiF family protein                                            |
| TGME49_212100 | c.-667C>G    | 5_prime_UTR_premature_start_codon_gain_variant | ThiF family protein                                            |
| TGME49_212100 | p.Leu32Phe   | missense_variant                               | ThiF family protein                                            |
| TGME49_212100 | p.Gly259Arg  | missense_variant                               | ThiF family protein                                            |
| TGME49_212100 | p.Gln375Glu  | missense_variant&splice_region_variant         | ThiF family protein                                            |
| TGME49_212100 | p.Ser453Thr  | missense_variant                               | ThiF family protein                                            |
| TGME49_212100 | p.Arg508Cys  | missense_variant                               | ThiF family protein                                            |
| TGME49_212100 | p.Arg611Gln  | missense_variant                               | ThiF family protein                                            |
| TGME49_212100 | p.Lys1036Thr | missense_variant                               | ThiF family protein                                            |
| TGME49_212100 | p.Val1059Ile | missense_variant                               | ThiF family protein                                            |
| TGME49_308050 | c.-273G>T    | 5_prime_UTR_premature_start_codon_gain_variant | thioredoxin domain-containing protein                          |
| TGME49_247660 | p.Val43Leu   | missense_variant                               | thioredoxin domain-containing protein                          |
| TGME49_224060 | p.Glu570Asp  | missense_variant                               | thioredoxin, putative                                          |
| TGME49_300260 | p.Ser37Thr   | missense_variant                               | threonyl-tRNA synthetase family protein                        |
| TGME49_300260 | p.His679Arg  | missense_variant                               | threonyl-tRNA synthetase family protein                        |
| TGME49_277910 | p.Glu864Asp  | missense_variant                               | thrombospondin type 1 domain-containing protein                |
| TGME49_293368 | p.Arg434His  | missense_variant                               | TIP49 C-terminus family protein                                |
| TGME49_262390 | p.Ala291Val  | missense_variant                               | TLD protein                                                    |
| TGME49_237280 | p.Thr932Met  | missense_variant                               | TLD protein                                                    |
| TGME49_237280 | p.Thr1473Ala | missense_variant                               | TLD protein                                                    |
| TGME49_237280 | p.Gly1680Val | missense_variant                               | TLD protein                                                    |
| TGME49_253480 | c.-747G>T    | 5_prime_UTR_premature_start_codon_gain_variant | topoisomerase VIA, putative                                    |
| TGME49_253480 | c.-526G>C    | 5_prime_UTR_premature_start_codon_gain_variant | topoisomerase VIA, putative                                    |
| TGME49_253480 | c.-213A>G    | 5_prime_UTR_premature_start_codon_gain_variant | topoisomerase VIA, putative                                    |
| TGME49_214080 | p.Ile115Val  | missense_variant                               | toxofilin                                                      |
| TGME49_278430 | p.Gly241Glu  | missense_variant                               | Toxoplasma gondii family A protein                             |
| TGME49_278430 | p.Gly237Val  | missense_variant                               | Toxoplasma gondii family A protein                             |
| TGME49_278430 | p.Asn132Ser  | missense_variant                               | Toxoplasma gondii family A protein                             |
| TGME49_278430 | p.Glu46Lys   | missense_variant                               | Toxoplasma gondii family A protein                             |

|               |             |                                                |                                    |
|---------------|-------------|------------------------------------------------|------------------------------------|
| TGME49_278420 | p.Glu311Gln | missense_variant                               | Toxoplasma gondii family A protein |
| TGME49_278420 | p.Ile256Val | missense_variant                               | Toxoplasma gondii family A protein |
| TGME49_278420 | p.Ala252Thr | missense_variant                               | Toxoplasma gondii family A protein |
| TGME49_278420 | p.Ser86Thr  | missense_variant                               | Toxoplasma gondii family A protein |
| TGME49_278420 | p.His20Arg  | missense_variant                               | Toxoplasma gondii family A protein |
| TGME49_278410 | p.Gln321His | missense_variant                               | Toxoplasma gondii family A protein |
| TGME49_278410 | p.Ala306Val | missense_variant                               | Toxoplasma gondii family A protein |
| TGME49_278410 | p.Gln283His | missense_variant                               | Toxoplasma gondii family A protein |
| TGME49_278410 | p.Ser256Asn | missense_variant                               | Toxoplasma gondii family A protein |
| TGME49_278410 | p.Leu149Met | missense_variant                               | Toxoplasma gondii family A protein |
| TGME49_278410 | p.Leu6Val   | missense_variant                               | Toxoplasma gondii family A protein |
| TGME49_278410 | c.-653A>G   | 5_prime_UTR_premature_start_codon_gain_variant | Toxoplasma gondii family A protein |
| TGME49_278400 | p.His187Asn | missense_variant                               | Toxoplasma gondii family A protein |
| TGME49_278400 | p.Asp162Glu | missense_variant                               | Toxoplasma gondii family A protein |
| TGME49_278400 | p.Val62Ala  | missense_variant                               | Toxoplasma gondii family A protein |
| TGME49_278400 | c.-86A>G    | 5_prime_UTR_premature_start_codon_gain_variant | Toxoplasma gondii family A protein |
| TGME49_278400 | c.-190A>C   | 5_prime_UTR_premature_start_codon_gain_variant | Toxoplasma gondii family A protein |
| TGME49_278400 | c.-304G>T   | 5_prime_UTR_premature_start_codon_gain_variant | Toxoplasma gondii family A protein |
| TGME49_278390 | p.Asn288Lys | missense_variant                               | Toxoplasma gondii family A protein |
| TGME49_278390 | p.Pro218Ala | missense_variant                               | Toxoplasma gondii family A protein |
| TGME49_278380 | p.Val324Ile | missense_variant                               | Toxoplasma gondii family A protein |
| TGME49_278380 | p.Gly276Arg | missense_variant                               | Toxoplasma gondii family A protein |
| TGME49_278380 | c.-86A>G    | 5_prime_UTR_premature_start_codon_gain_variant | Toxoplasma gondii family A protein |
| TGME49_278370 | c.-399T>C   | 5_prime_UTR_premature_start_codon_gain_variant | Toxoplasma gondii family A protein |
| TGME49_278365 | c.*852C>T   | splice_region_variant                          | Toxoplasma gondii family A protein |
| TGME49_278365 | p.Ser340Pro | missense_variant                               | Toxoplasma gondii family A protein |
| TGME49_278365 | p.Gly292Ser | missense_variant                               | Toxoplasma gondii family A protein |
| TGME49_278365 | p.Gln245His | missense_variant                               | Toxoplasma gondii family A protein |
| TGME49_278365 | p.Thr233Pro | missense_variant                               | Toxoplasma gondii family A protein |
| TGME49_278365 | p.Asn215Thr | missense_variant                               | Toxoplasma gondii family A protein |
| TGME49_278365 | p.Asp205Gly | missense_variant                               | Toxoplasma gondii family A protein |
| TGME49_278365 | p.Ser187Asn | missense_variant                               | Toxoplasma gondii family A protein |
| TGME49_278365 | p.Ala39Ser  | missense_variant                               | Toxoplasma gondii family A protein |
| TGME49_278365 | c.-304C>T   | 5_prime_UTR_premature_start_codon_gain_variant | Toxoplasma gondii family A protein |
| TGME49_278365 | c.-537C>T   | 5_prime_UTR_premature_start_codon_gain_variant | Toxoplasma gondii family A protein |
| TGME49_278365 | c.-667C>T   | 5_prime_UTR_premature_start_codon_gain_variant | Toxoplasma gondii family A protein |
| TGME49_278365 | c.-701C>T   | 5_prime_UTR_premature_start_codon_gain_variant | Toxoplasma gondii family A protein |
| TGME49_278360 | p.Phe612Leu | missense_variant                               | Toxoplasma gondii family A protein |
| TGME49_278360 | p.Val574Ala | missense_variant                               | Toxoplasma gondii family A protein |
| TGME49_278360 | p.Ala563Thr | missense_variant                               | Toxoplasma gondii family A protein |
| TGME49_278360 | p.Ser525Pro | missense_variant                               | Toxoplasma gondii family A protein |
| TGME49_278360 | p.Met447Leu | missense_variant                               | Toxoplasma gondii family A protein |
| TGME49_278360 | p.Ser431Ala | missense_variant                               | Toxoplasma gondii family A protein |
| TGME49_278360 | p.Asn319Thr | missense_variant                               | Toxoplasma gondii family A protein |
| TGME49_278360 | p.Asn319Asp | missense_variant                               | Toxoplasma gondii family A protein |
| TGME49_278360 | p.Ser221Thr | missense_variant                               | Toxoplasma gondii family A protein |
| TGME49_278360 | p.Gly211Ser | missense_variant                               | Toxoplasma gondii family A protein |
| TGME49_278360 | p.Glu199Asp | missense_variant                               | Toxoplasma gondii family A protein |
| TGME49_278360 | p.Lys130Thr | missense_variant                               | Toxoplasma gondii family A protein |
| TGME49_278360 | p.Ser124Arg | missense_variant                               | Toxoplasma gondii family A protein |
| TGME49_278360 | p.Thr59Ser  | missense_variant                               | Toxoplasma gondii family A protein |
| TGME49_278360 | p.Asp47Glu  | missense_variant                               | Toxoplasma gondii family A protein |
| TGME49_278360 | c.-189C>T   | 5_prime_UTR_premature_start_codon_gain_variant | Toxoplasma gondii family A protein |
| TGME49_278360 | c.-572C>G   | 5_prime_UTR_premature_start_codon_gain_variant | Toxoplasma gondii family A protein |
| TGME49_278350 | p.Ala606Val | missense_variant                               | Toxoplasma gondii family A protein |
| TGME49_278350 | p.Val586Ile | missense_variant                               | Toxoplasma gondii family A protein |
| TGME49_278350 | p.Glu570Gln | missense_variant                               | Toxoplasma gondii family A protein |
| TGME49_278350 | p.Gly558Ser | missense_variant                               | Toxoplasma gondii family A protein |
| TGME49_278350 | p.Ala498Thr | missense_variant                               | Toxoplasma gondii family A protein |
| TGME49_278350 | p.Ala494Thr | missense_variant                               | Toxoplasma gondii family A protein |
| TGME49_278350 | p.Asn490Lys | missense_variant                               | Toxoplasma gondii family A protein |
| TGME49_278350 | p.Ser473Asn | missense_variant                               | Toxoplasma gondii family A protein |
| TGME49_278350 | p.Pro470Ser | missense_variant                               | Toxoplasma gondii family A protein |
| TGME49_278350 | p.Lys444Arg | missense_variant                               | Toxoplasma gondii family A protein |
| TGME49_278350 | p.Glu415Gly | missense_variant                               | Toxoplasma gondii family A protein |
| TGME49_278350 | p.Lys414Arg | missense_variant                               | Toxoplasma gondii family A protein |
| TGME49_278350 | p.Glu404Asp | missense_variant                               | Toxoplasma gondii family A protein |
| TGME49_278350 | p.Glu373Asp | missense_variant                               | Toxoplasma gondii family A protein |
| TGME49_278350 | p.Ser361Thr | missense_variant                               | Toxoplasma gondii family A protein |
| TGME49_278350 | p.Glu346Gln | missense_variant                               | Toxoplasma gondii family A protein |
| TGME49_278350 | p.Thr331Ile | missense_variant                               | Toxoplasma gondii family A protein |
| TGME49_278350 | p.Asn318Ile | missense_variant                               | Toxoplasma gondii family A protein |
| TGME49_278350 | p.Asp313Glu | missense_variant                               | Toxoplasma gondii family A protein |
| TGME49_278350 | p.Ser262Arg | missense_variant                               | Toxoplasma gondii family A protein |
| TGME49_278350 | p.Ser262Gly | missense_variant                               | Toxoplasma gondii family A protein |
| TGME49_278350 | p.Pro259Thr | missense_variant                               | Toxoplasma gondii family A protein |
| TGME49_278350 | p.Ala213Ser | missense_variant                               | Toxoplasma gondii family A protein |
| TGME49_278350 | p.Val51Ile  | missense_variant                               | Toxoplasma gondii family A protein |
| TGME49_278350 | p.Ile45Thr  | missense_variant                               | Toxoplasma gondii family A protein |
| TGME49_278350 | p.Thr37Ser  | missense_variant                               | Toxoplasma gondii family A protein |
| TGME49_278340 | p.Ser653Pro | missense_variant                               | Toxoplasma gondii family A protein |
| TGME49_278340 | p.Glu596Asp | missense_variant                               | Toxoplasma gondii family A protein |
| TGME49_278340 | p.Glu535Asp | missense_variant                               | Toxoplasma gondii family A protein |
| TGME49_278340 | p.Pro500Leu | missense_variant                               | Toxoplasma gondii family A protein |
| TGME49_278340 | p.Ala498Asp | missense_variant                               | Toxoplasma gondii family A protein |

|               |              |                                                |                                                                                   |
|---------------|--------------|------------------------------------------------|-----------------------------------------------------------------------------------|
| TGME49_278340 | p.Ala398Val  | missense_variant                               | Toxoplasma gondii family A protein                                                |
| TGME49_278340 | p.His397Arg  | missense_variant                               | Toxoplasma gondii family A protein                                                |
| TGME49_278340 | p.Val275Ile  | missense_variant                               | Toxoplasma gondii family A protein                                                |
| TGME49_278340 | p.Glu260Gly  | missense_variant                               | Toxoplasma gondii family A protein                                                |
| TGME49_278340 | p.Lys258Thr  | missense_variant                               | Toxoplasma gondii family A protein                                                |
| TGME49_278340 | p.Ala256Val  | missense_variant                               | Toxoplasma gondii family A protein                                                |
| TGME49_278340 | p.Asp194Glu  | missense_variant                               | Toxoplasma gondii family A protein                                                |
| TGME49_278340 | p.Gly131Glu  | missense_variant                               | Toxoplasma gondii family A protein                                                |
| TGME49_278340 | p.Ala82Val   | missense_variant                               | Toxoplasma gondii family A protein                                                |
| TGME49_278340 | p.Glu81Asp   | missense_variant                               | Toxoplasma gondii family A protein                                                |
| TGME49_278340 | c.-270G>T    | 5_prime_UTR_premature_start_codon_gain_variant | Toxoplasma gondii family A protein                                                |
| TGME49_278330 | p.Val237Ala  | missense_variant                               | Toxoplasma gondii family A protein                                                |
| TGME49_278330 | p.Lys213Glu  | missense_variant                               | Toxoplasma gondii family A protein                                                |
| TGME49_278320 | p.Ser81Phe   | missense_variant                               | Toxoplasma gondii family A protein                                                |
| TGME49_278320 | p.Val81Ile   | missense_variant                               | Toxoplasma gondii family A protein                                                |
| TGME49_278300 | p.Arg91Leu   | missense_variant                               | Toxoplasma gondii family A protein                                                |
| TGME49_278300 | p.Arg7Gln    | missense_variant                               | Toxoplasma gondii family A protein                                                |
| TGME49_278290 | p.Ser279Pro  | missense_variant                               | Toxoplasma gondii family A protein                                                |
| TGME49_278290 | p.Ser109Arg  | missense_variant                               | Toxoplasma gondii family A protein                                                |
| TGME49_278290 | p.Gly36Glu   | missense_variant                               | Toxoplasma gondii family A protein                                                |
| TGME49_278100 | c.-1384C>G   | 5_prime_UTR_premature_start_codon_gain_variant | Toxoplasma gondii family A protein                                                |
| TGME49_224660 | c.-812G>T    | 5_prime_UTR_premature_start_codon_gain_variant | transcription factor s-ii (tfiis), central domain-containing protein              |
| TGME49_224660 | p.Arg1060Gly | missense_variant                               | transcription factor s-ii (tfiis), central domain-containing protein              |
| TGME49_224660 | p.Asp1122Asn | missense_variant                               | transcription factor s-ii (tfiis), central domain-containing protein              |
| TGME49_224660 | p.Val1136Ala | missense_variant                               | transcription factor s-ii (tfiis), central domain-containing protein              |
| TGME49_318260 | p.Thr559Ala  | missense_variant                               | transcription initiation factor TFIID subunit TAF5                                |
| TGME49_221670 | c.1481-3C>T  | splice_region_variant                          | transcriptional elongation factor FACT140                                         |
| TGME49_221670 | c.-465C>T    | 5_prime_UTR_premature_start_codon_gain_variant | transcriptional elongation factor FACT140                                         |
| TGME49_223970 | c.-1372C>T   | 5_prime_UTR_premature_start_codon_gain_variant | translation elongation and release factors (gtpases), putative                    |
| TGME49_223970 | c.-978G>A    | 5_prime_UTR_premature_start_codon_gain_variant | translation elongation and release factors (gtpases), putative                    |
| TGME49_223970 | p.Pro56Leu   | missense_variant                               | translation elongation and release factors (gtpases), putative                    |
| TGME49_223970 | p.Ser111Pro  | missense_variant                               | translation elongation and release factors (gtpases), putative                    |
| TGME49_214270 | c.3175-5T>C  | splice_region_variant                          | translation initiation factor IF-2, putative                                      |
| TGME49_214270 | p.Thr493Ser  | missense_variant                               | translation initiation factor IF-2, putative                                      |
| TGME49_214270 | c.102+7G>A   | splice_region_variant                          | translation initiation factor IF-2, putative                                      |
| TGME49_224235 | p.Thr5Arg    | missense_variant                               | translation initiation factor IF-3 protein                                        |
| TGME49_224235 | p.Val19Ala   | missense_variant                               | translation initiation factor IF-3 protein                                        |
| TGME49_224235 | p.Arg61Gly   | missense_variant                               | translation initiation factor IF-3 protein                                        |
| TGME49_224235 | p.His115Arg  | missense_variant                               | translation initiation factor IF-3 protein                                        |
| TGME49_211410 | p.Lys226Ile  | missense_variant                               | translation initiation factor sui1 protein                                        |
| TGME49_211410 | p.Met573Leu  | missense_variant                               | translation initiation factor sui1 protein                                        |
| TGME49_235130 | c.-2456G>T   | 5_prime_UTR_premature_start_codon_gain_variant | transmembrane protein                                                             |
| TGME49_235130 | c.-1368T>C   | 5_prime_UTR_premature_start_codon_gain_variant | transmembrane protein                                                             |
| TGME49_297245 | p.Ala475Val  | missense_variant                               | transporter, major facilitator family protein                                     |
| TGME49_297245 | p.Val457Leu  | missense_variant                               | transporter, major facilitator family protein                                     |
| TGME49_297245 | p.Ala444Thr  | missense_variant                               | transporter, major facilitator family protein                                     |
| TGME49_297245 | p.Pro73His   | missense_variant                               | transporter, major facilitator family protein                                     |
| TGME49_253130 | p.Ile435Val  | missense_variant                               | transporter, major facilitator family protein                                     |
| TGME49_253130 | c.953+8G>C   | splice_region_variant                          | transporter, major facilitator family protein                                     |
| TGME49_253700 | p.Gln931Pro  | missense_variant                               | transporter, major facilitator family protein                                     |
| TGME49_253700 | c.1883-6G>A  | splice_region_variant                          | transporter, major facilitator family protein                                     |
| TGME49_253700 | c.-240T>G    | 5_prime_UTR_premature_start_codon_gain_variant | transporter, major facilitator family protein                                     |
| TGME49_319740 | p.Ala274Val  | missense_variant                               | transporter, major facilitator family protein                                     |
| TGME49_319740 | p.Asp397Gly  | missense_variant                               | transporter, major facilitator family protein                                     |
| TGME49_319740 | p.Glu403Gly  | missense_variant                               | transporter, major facilitator family protein                                     |
| TGME49_319740 | p.Gln441His  | missense_variant                               | transporter, major facilitator family protein                                     |
| TGME49_318150 | c.-1444A>G   | 5_prime_UTR_premature_start_codon_gain_variant | transporter, major facilitator family protein                                     |
| TGME49_248840 | p.Gly703Ser  | missense_variant                               | transporter, major facilitator family protein                                     |
| TGME49_234410 | c.-369C>T    | 5_prime_UTR_premature_start_codon_gain_variant | transporter, small conductance mechanosensitive ion channel (MscS) family protein |
| TGME49_234410 | c.-100A>T    | 5_prime_UTR_premature_start_codon_gain_variant | transporter, small conductance mechanosensitive ion channel (MscS) family protein |
| TGME49_234410 | p.Ala79Val   | missense_variant                               | transporter, small conductance mechanosensitive ion channel (MscS) family protein |
| TGME49_234410 | p.Ser158Gly  | missense_variant                               | transporter, small conductance mechanosensitive ion channel (MscS) family protein |
| TGME49_234410 | p.Ile244Phe  | missense_variant                               | transporter, small conductance mechanosensitive ion channel (MscS) family protein |
| TGME49_234410 | p.Ala269Thr  | missense_variant                               | transporter, small conductance mechanosensitive ion channel (MscS) family protein |
| TGME49_234410 | p.Val345Ile  | missense_variant                               | transporter, small conductance mechanosensitive ion channel (MscS) family protein |
| TGME49_234410 | p.His1573Tyr | missense_variant                               | transporter, small conductance mechanosensitive ion channel (MscS) family protein |
| TGME49_234410 | p.His1643Arg | missense_variant                               | transporter, small conductance mechanosensitive ion channel (MscS) family protein |
| TGME49_234410 | p.Leu1689Ser | missense_variant                               | transporter, small conductance mechanosensitive ion channel (MscS) family protein |
| TGME49_234410 | p.Thr1997Ala | missense_variant                               | transporter, small conductance mechanosensitive ion channel (MscS) family protein |
| TGME49_234410 | p.Ser2561Asn | missense_variant                               | transporter, small conductance mechanosensitive ion channel (MscS) family protein |
| TGME49_234410 | c.8599-5C>T  | splice_region_variant                          | transporter, small conductance mechanosensitive ion channel (MscS) family protein |
| TGME49_234410 | p.Leu3246Phe | missense_variant                               | transporter, small conductance mechanosensitive ion channel (MscS) family protein |
| TGME49_219650 | c.7783-6C>A  | splice_region_variant                          | transporter, small conductance mechanosensitive ion channel (MscS) family protein |
| TGME49_219650 | p.Asn2107Asp | missense_variant                               | transporter, small conductance mechanosensitive ion channel (MscS) family protein |
| TGME49_219650 | p.Lys1626Asn | missense_variant                               | transporter, small conductance mechanosensitive ion channel (MscS) family protein |
| TGME49_219650 | p.Leu1523Val | missense_variant                               | transporter, small conductance mechanosensitive ion channel (MscS) family protein |
| TGME49_219650 | p.Ser1334Arg | missense_variant                               | transporter, small conductance mechanosensitive ion channel (MscS) family protein |
| TGME49_219650 | p.Glu1298Gly | missense_variant                               | transporter, small conductance mechanosensitive ion channel (MscS) family protein |
| TGME49_219650 | p.Glu1275Gln | missense_variant                               | transporter, small conductance mechanosensitive ion channel (MscS) family protein |
| TGME49_219650 | p.Ser1149Leu | missense_variant                               | transporter, small conductance mechanosensitive ion channel (MscS) family protein |
| TGME49_219650 | p.Arg1034Thr | missense_variant                               | transporter, small conductance mechanosensitive ion channel (MscS) family protein |
| TGME49_219650 | p.Ser1022Asn | missense_variant                               | transporter, small conductance mechanosensitive ion channel (MscS) family protein |
| TGME49_219650 | p.Lys842Asn  | missense_variant                               | transporter, small conductance mechanosensitive ion channel (MscS) family protein |
| TGME49_219650 | p.Asp694Glu  | missense_variant                               | transporter, small conductance mechanosensitive ion channel (MscS) family protein |
| TGME49_219650 | c.1363-1G>T  | splice_acceptor_variant                        | transporter, small conductance mechanosensitive ion channel (MscS) family protein |

|               |              |                                                |                                                                               |
|---------------|--------------|------------------------------------------------|-------------------------------------------------------------------------------|
| TGME49_253510 | c.-858C>T    | 5_prime_UTR_premature_start_codon_gain_variant | transporter/permease protein                                                  |
| TGME49_253510 | c.-129T>C    | 5_prime_UTR_premature_start_codon_gain_variant | transporter/permease protein                                                  |
| TGME49_297720 | p.Val527Asp  | missense_variant                               | trehalose-phosphatase                                                         |
| TGME49_297720 | c.3096+7G>C  | splice_region_variant                          | trehalose-phosphatase                                                         |
| TGME49_250750 | p.Gly1063Arg | missense_variant                               | tRNA (uracil-5-)-methyltransferase                                            |
| TGME49_250750 | p.Asp821Asn  | missense_variant                               | tRNA (uracil-5-)-methyltransferase                                            |
| TGME49_250750 | p.Ser646Pro  | missense_variant                               | tRNA (uracil-5-)-methyltransferase                                            |
| TGME49_250750 | p.Thr573Ala  | missense_variant                               | tRNA (uracil-5-)-methyltransferase                                            |
| TGME49_250750 | p.Gly283Glu  | missense_variant                               | tRNA (uracil-5-)-methyltransferase                                            |
| TGME49_250750 | p.Glu214Gln  | missense_variant                               | tRNA (uracil-5-)-methyltransferase                                            |
| TGME49_250750 | c.102+7A>G   | splice_region_variant                          | tRNA (uracil-5-)-methyltransferase                                            |
| TGME49_219430 | c.-336T>G    | 5_prime_UTR_premature_start_codon_gain_variant | tRNA ligase class II core domain (G, H, P, S and T) domain-containing protein |
| TGME49_219430 | p.Glu490Gln  | missense_variant                               | tRNA ligase class II core domain (G, H, P, S and T) domain-containing protein |
| TGME49_219430 | p.Asp831Glu  | missense_variant                               | tRNA ligase class II core domain (G, H, P, S and T) domain-containing protein |
| TGME49_219430 | p.Arg941Lys  | missense_variant                               | tRNA ligase class II core domain (G, H, P, S and T) domain-containing protein |
| TGME49_224200 | p.Ala489Ser  | missense_variant                               | tRNA pseudouridine synthase                                                   |
| TGME49_224200 | p.Arg403Lys  | missense_variant                               | tRNA pseudouridine synthase                                                   |
| TGME49_224200 | p.Gly356Asp  | missense_variant                               | tRNA pseudouridine synthase                                                   |
| TGME49_224200 | p.Asp341Asn  | missense_variant                               | tRNA pseudouridine synthase                                                   |
| TGME49_224200 | p.Gln258Arg  | missense_variant                               | tRNA pseudouridine synthase                                                   |
| TGME49_224200 | p.Thr230Ala  | missense_variant                               | tRNA pseudouridine synthase                                                   |
| TGME49_224200 | p.Lys228Thr  | missense_variant                               | tRNA pseudouridine synthase                                                   |
| TGME49_224200 | p.Gln48Lys   | missense_variant                               | tRNA pseudouridine synthase                                                   |
| TGME49_224200 | c.-92C>A     | 5_prime_UTR_premature_start_codon_gain_variant | tRNA pseudouridine synthase                                                   |
| TGME49_254110 | p.Asn333His  | missense_variant                               | tryptophanyl-tRNA synthetase (TrpRS1)                                         |
| TGME49_318240 | p.Thr1563Arg | missense_variant                               | Tubulin-tyrosine ligase family protein                                        |
| TGME49_318240 | p.Asp1081Asn | missense_variant                               | Tubulin-tyrosine ligase family protein                                        |
| TGME49_253860 | p.Thr2004Ala | missense_variant                               | Tyrosine kinase-like (TKL) protein                                            |
| TGME49_253860 | p.Pro1997Leu | missense_variant                               | Tyrosine kinase-like (TKL) protein                                            |
| TGME49_253860 | p.Pro1316Leu | missense_variant                               | Tyrosine kinase-like (TKL) protein                                            |
| TGME49_253860 | p.Glu334Gln  | missense_variant                               | Tyrosine kinase-like (TKL) protein                                            |
| TGME49_253860 | p.Glu284Gly  | missense_variant                               | Tyrosine kinase-like (TKL) protein                                            |
| TGME49_301270 | c.-108G>C    | 5_prime_UTR_premature_start_codon_gain_variant | Tyrosine kinase-like (TKL) protein                                            |
| TGME49_301270 | p.Phe165Tyr  | missense_variant                               | Tyrosine kinase-like (TKL) protein                                            |
| TGME49_301270 | p.Arg894Met  | missense_variant                               | Tyrosine kinase-like (TKL) protein                                            |
| TGME49_301270 | p.Leu909Met  | missense_variant                               | Tyrosine kinase-like (TKL) protein                                            |
| TGME49_301270 | p.Leu1273Gln | missense_variant                               | Tyrosine kinase-like (TKL) protein                                            |
| TGME49_301270 | p.Thr1798Ala | missense_variant                               | Tyrosine kinase-like (TKL) protein                                            |
| TGME49_301270 | p.Ala2290Val | missense_variant                               | Tyrosine kinase-like (TKL) protein                                            |
| TGME49_301270 | p.Lys1313Gln | missense_variant                               | Tyrosine kinase-like (TKL) protein                                            |
| TGME49_301270 | p.Gln3554Pro | missense_variant                               | Tyrosine kinase-like (TKL) protein                                            |
| TGME49_239130 | p.Asp626His  | missense_variant                               | Tyrosine kinase-like (TKL) protein                                            |
| TGME49_239130 | p.Arg703Leu  | missense_variant                               | Tyrosine kinase-like (TKL) protein                                            |
| TGME49_239130 | p.Gly717Ala  | missense_variant                               | Tyrosine kinase-like (TKL) protein                                            |
| TGME49_239130 | p.Arg837Cys  | missense_variant                               | Tyrosine kinase-like (TKL) protein                                            |
| TGME49_239130 | p.Asn1001Ser | missense_variant                               | Tyrosine kinase-like (TKL) protein                                            |
| TGME49_239130 | p.Val1099Ile | missense_variant                               | Tyrosine kinase-like (TKL) protein                                            |
| TGME49_239130 | p.Arg1268Gly | missense_variant                               | Tyrosine kinase-like (TKL) protein                                            |
| TGME49_234970 | p.Ala57Val   | missense_variant                               | Tyrosine kinase-like (TKL) protein                                            |
| TGME49_234970 | p.Gly114Ala  | missense_variant                               | Tyrosine kinase-like (TKL) protein                                            |
| TGME49_234970 | c.1550-7T>C  | splice_region_variant                          | Tyrosine kinase-like (TKL) protein                                            |
| TGME49_234970 | c.1550-4G>A  | splice_region_variant                          | Tyrosine kinase-like (TKL) protein                                            |
| TGME49_234970 | p.Val988Ala  | missense_variant                               | Tyrosine kinase-like (TKL) protein                                            |
| TGME49_234970 | p.Glu1160Asp | missense_variant                               | Tyrosine kinase-like (TKL) protein                                            |
| TGME49_234970 | c.4621-7T>G  | splice_region_variant                          | Tyrosine kinase-like (TKL) protein                                            |
| TGME49_234970 | p.Pro1744Gln | missense_variant                               | Tyrosine kinase-like (TKL) protein                                            |
| TGME49_234970 | p.Ala1962Thr | missense_variant                               | Tyrosine kinase-like (TKL) protein                                            |
| TGME49_236240 | c.-847T>G    | 5_prime_UTR_premature_start_codon_gain_variant | Tyrosine kinase-like (TKL) protein                                            |
| TGME49_236240 | c.237+6T>C   | splice_region_variant                          | Tyrosine kinase-like (TKL) protein                                            |
| TGME49_236240 | p.Arg182His  | missense_variant                               | Tyrosine kinase-like (TKL) protein                                            |
| TGME49_236240 | p.Cys234Arg  | missense_variant                               | Tyrosine kinase-like (TKL) protein                                            |
| TGME49_236240 | p.Gly722Arg  | missense_variant                               | Tyrosine kinase-like (TKL) protein                                            |
| TGME49_236240 | p.Glu725Gln  | missense_variant                               | Tyrosine kinase-like (TKL) protein                                            |
| TGME49_236240 | p.Leu739Ser  | missense_variant                               | Tyrosine kinase-like (TKL) protein                                            |
| TGME49_236240 | c.*1272G>T   | splice_region_variant                          | Tyrosine kinase-like (TKL) protein                                            |
| TGME49_221980 | p.Asp95Asn   | missense_variant                               | U1 zinc finger protein                                                        |
| TGME49_221980 | p.Pro274Ser  | missense_variant                               | U1 zinc finger protein                                                        |
| TGME49_221980 | p.Glu490Gly  | missense_variant                               | U1 zinc finger protein                                                        |
| TGME49_234520 | c.1389+8T>A  | splice_region_variant                          | U2 snRNP auxiliary factor, large subunit, splicing factor subfamily protein   |
| TGME49_253520 | p.Glu675Asp  | missense_variant                               | U3 small nucleolar RNA-associated protein 6 protein                           |
| TGME49_253520 | p.Ile438Met  | missense_variant                               | U3 small nucleolar RNA-associated protein 6 protein                           |
| TGME49_297140 | c.-352T>C    | 5_prime_UTR_premature_start_codon_gain_variant | U6 snRNA-associated sm family protein Lsm2, putative                          |
| TGME49_297140 | p.Pro7Leu    | missense_variant                               | U6 snRNA-associated sm family protein Lsm2, putative                          |
| TGME49_249160 | p.Arg723Cys  | missense_variant                               | UAA transporter family protein                                                |
| TGME49_249160 | p.Pro526Arg  | missense_variant                               | UAA transporter family protein                                                |
| TGME49_249160 | p.Thr231Met  | missense_variant                               | UAA transporter family protein                                                |
| TGME49_249160 | p.Lys213Asn  | missense_variant                               | UAA transporter family protein                                                |
| TGME49_320220 | c.1378+6T>C  | splice_region_variant                          | ubiquinol cytochrome c oxidoreductase, putative                               |
| TGME49_320220 | p.Cys32Tyr   | missense_variant                               | ubiquinol cytochrome c oxidoreductase, putative                               |
| TGME49_298030 | c.763-5C>G   | splice_region_variant                          | Ubiquinol-cytochrome c chaperone, putative                                    |
| TGME49_221610 | c.-2931C>T   | 5_prime_UTR_premature_start_codon_gain_variant | ubiquitin carboxyl-terminal hydrolase                                         |
| TGME49_221610 | c.-79A>T     | 5_prime_UTR_premature_start_codon_gain_variant | ubiquitin carboxyl-terminal hydrolase                                         |
| TGME49_221610 | p.Arg3His    | missense_variant                               | ubiquitin carboxyl-terminal hydrolase                                         |
| TGME49_221610 | p.Glu175Lys  | missense_variant                               | ubiquitin carboxyl-terminal hydrolase                                         |
| TGME49_221610 | p.Val410Ile  | missense_variant                               | ubiquitin carboxyl-terminal hydrolase                                         |

|               |              |                                                |                                                                      |
|---------------|--------------|------------------------------------------------|----------------------------------------------------------------------|
| TGME49_210781 | p.Cys24Ser   | missense_variant                               | ubiquitin carboxyl-terminal hydrolase                                |
| TGME49_210781 | p.Pro166Ala  | missense_variant                               | ubiquitin carboxyl-terminal hydrolase                                |
| TGME49_210781 | p.Pro428His  | missense_variant                               | ubiquitin carboxyl-terminal hydrolase                                |
| TGME49_210781 | p.Ala536Val  | missense_variant                               | ubiquitin carboxyl-terminal hydrolase                                |
| TGME49_210781 | p.Ala1128Val | missense_variant                               | ubiquitin carboxyl-terminal hydrolase                                |
| TGME49_210781 | p.Glu1133Asp | missense_variant                               | ubiquitin carboxyl-terminal hydrolase                                |
| TGME49_210781 | p.Ala1500Asp | missense_variant                               | ubiquitin carboxyl-terminal hydrolase                                |
| TGME49_210781 | p.Gly3187Ser | missense_variant                               | ubiquitin carboxyl-terminal hydrolase                                |
| TGME49_223450 | p.Glu2346Gly | missense_variant                               | ubiquitin carboxyl-terminal hydrolase                                |
| TGME49_223450 | p.Asp1615Gly | missense_variant                               | ubiquitin carboxyl-terminal hydrolase                                |
| TGME49_223450 | p.Arg1366Ser | missense_variant                               | ubiquitin carboxyl-terminal hydrolase                                |
| TGME49_223450 | p.Ala939Val  | missense_variant                               | ubiquitin carboxyl-terminal hydrolase                                |
| TGME49_223450 | p.Ala939Ser  | missense_variant                               | ubiquitin carboxyl-terminal hydrolase                                |
| TGME49_223450 | p.Glu862Lys  | missense_variant                               | ubiquitin carboxyl-terminal hydrolase                                |
| TGME49_223450 | p.Thr756Asn  | missense_variant                               | ubiquitin carboxyl-terminal hydrolase                                |
| TGME49_223450 | p.Ser254Thr  | missense_variant                               | ubiquitin carboxyl-terminal hydrolase                                |
| TGME49_223450 | p.Cys186Trp  | missense_variant                               | ubiquitin carboxyl-terminal hydrolase                                |
| TGME49_223450 | p.Asn161Thr  | missense_variant                               | ubiquitin carboxyl-terminal hydrolase                                |
| TGME49_223450 | p.Ser113Gly  | missense_variant                               | ubiquitin carboxyl-terminal hydrolase                                |
| TGME49_223450 | c.-1266C>T   | 5_prime_UTR_premature_start_codon_gain_variant | ubiquitin carboxyl-terminal hydrolase                                |
| TGME49_277895 | p.Pro79Leu   | missense_variant                               | ubiquitin carboxyl-terminal hydrolase                                |
| TGME49_277895 | p.Gly542Arg  | missense_variant                               | ubiquitin carboxyl-terminal hydrolase                                |
| TGME49_277895 | p.Ser650Ala  | missense_variant                               | ubiquitin carboxyl-terminal hydrolase                                |
| TGME49_277895 | p.Gly752Glu  | missense_variant                               | ubiquitin carboxyl-terminal hydrolase                                |
| TGME49_277895 | p.Ala944Thr  | missense_variant                               | ubiquitin carboxyl-terminal hydrolase                                |
| TGME49_277895 | p.Asp990Tyr  | missense_variant                               | ubiquitin carboxyl-terminal hydrolase                                |
| TGME49_277895 | p.Gly994Trp  | missense_variant                               | ubiquitin carboxyl-terminal hydrolase                                |
| TGME49_277895 | p.Lys1002Thr | missense_variant                               | ubiquitin carboxyl-terminal hydrolase                                |
| TGME49_277895 | p.Met1005Val | missense_variant                               | ubiquitin carboxyl-terminal hydrolase                                |
| TGME49_277895 | p.Ala1341Ser | missense_variant                               | ubiquitin carboxyl-terminal hydrolase                                |
| TGME49_277895 | p.Thr1447Met | missense_variant                               | ubiquitin carboxyl-terminal hydrolase                                |
| TGME49_277895 | p.Met1582Val | missense_variant                               | ubiquitin carboxyl-terminal hydrolase                                |
| TGME49_277895 | p.Lys1663Arg | missense_variant                               | ubiquitin carboxyl-terminal hydrolase                                |
| TGME49_277895 | p.Ala1683Thr | missense_variant                               | ubiquitin carboxyl-terminal hydrolase                                |
| TGME49_277895 | p.Val2878Ile | missense_variant                               | ubiquitin carboxyl-terminal hydrolase                                |
| TGME49_247240 | c.970-5C>T   | splice_region_variant                          | ubiquitin carboxyl-terminal hydrolase, family 1 protein              |
| TGME49_247240 | p.Glu340Asp  | missense_variant                               | ubiquitin carboxyl-terminal hydrolase, family 1 protein              |
| TGME49_319870 | c.838+51>G   | splice_region_variant                          | ubiquitin-conjugating enzyme subfamily protein                       |
| TGME49_319870 | c.517-4G>T   | splice_region_variant                          | ubiquitin-conjugating enzyme subfamily protein                       |
| TGME49_251640 | c.316-71>C   | splice_region_variant                          | ubiquitin-conjugating enzyme subfamily protein                       |
| TGME49_248460 | c.-382G>T    | 5_prime_UTR_premature_start_codon_gain_variant | ubiquitin, putative                                                  |
| TGME49_248460 | p.Glu26Asp   | missense_variant                               | ubiquitin, putative                                                  |
| TGME49_235750 | c.727-41>G   | splice_region_variant                          | ULK kinase                                                           |
| TGME49_214470 | p.Pro210Leu  | missense_variant                               | Ulp1 protease family, C-terminal catalytic domain-containing protein |
| TGME49_214470 | p.Pro210Ser  | missense_variant                               | Ulp1 protease family, C-terminal catalytic domain-containing protein |
| TGME49_251510 | p.Ala1673Ser | missense_variant                               | Ulp1 protease family, C-terminal catalytic domain-containing protein |
| TGME49_251510 | p.Lys1655Met | missense_variant                               | Ulp1 protease family, C-terminal catalytic domain-containing protein |
| TGME49_251510 | p.Lys1655*   | stop_gained                                    | Ulp1 protease family, C-terminal catalytic domain-containing protein |
| TGME49_251510 | p.Ala1653Pro | missense_variant                               | Ulp1 protease family, C-terminal catalytic domain-containing protein |
| TGME49_251510 | p.Asp1563Gly | missense_variant                               | Ulp1 protease family, C-terminal catalytic domain-containing protein |
| TGME49_251510 | p.Gly1471Glu | missense_variant                               | Ulp1 protease family, C-terminal catalytic domain-containing protein |
| TGME49_251510 | p.Leu1222Phe | missense_variant                               | Ulp1 protease family, C-terminal catalytic domain-containing protein |
| TGME49_251510 | p.Gln1108Glu | missense_variant                               | Ulp1 protease family, C-terminal catalytic domain-containing protein |
| TGME49_251510 | p.Val1107Glu | missense_variant                               | Ulp1 protease family, C-terminal catalytic domain-containing protein |
| TGME49_251510 | p.Ala1106Gly | missense_variant                               | Ulp1 protease family, C-terminal catalytic domain-containing protein |
| TGME49_251510 | p.Ala1069Thr | missense_variant                               | Ulp1 protease family, C-terminal catalytic domain-containing protein |
| TGME49_251510 | p.Glu1068Asp | missense_variant                               | Ulp1 protease family, C-terminal catalytic domain-containing protein |
| TGME49_251510 | p.Val1048Ala | missense_variant                               | Ulp1 protease family, C-terminal catalytic domain-containing protein |
| TGME49_251510 | p.Asn1047Asp | missense_variant                               | Ulp1 protease family, C-terminal catalytic domain-containing protein |
| TGME49_251510 | p.Ala1021Val | missense_variant                               | Ulp1 protease family, C-terminal catalytic domain-containing protein |
| TGME49_251510 | p.Glu904Gln  | missense_variant                               | Ulp1 protease family, C-terminal catalytic domain-containing protein |
| TGME49_251510 | p.Pro820Leu  | missense_variant                               | Ulp1 protease family, C-terminal catalytic domain-containing protein |
| TGME49_251510 | p.Arg717Gln  | missense_variant                               | Ulp1 protease family, C-terminal catalytic domain-containing protein |
| TGME49_251510 | p.Asp505Glu  | missense_variant                               | Ulp1 protease family, C-terminal catalytic domain-containing protein |
| TGME49_251510 | p.Lys504Gln  | missense_variant                               | Ulp1 protease family, C-terminal catalytic domain-containing protein |
| TGME49_251510 | p.Ala469Val  | missense_variant                               | Ulp1 protease family, C-terminal catalytic domain-containing protein |
| TGME49_251510 | p.Ala356Ser  | missense_variant                               | Ulp1 protease family, C-terminal catalytic domain-containing protein |
| TGME49_251510 | p.His329Gln  | missense_variant                               | Ulp1 protease family, C-terminal catalytic domain-containing protein |
| TGME49_251510 | p.Ser232Cys  | missense_variant                               | Ulp1 protease family, C-terminal catalytic domain-containing protein |
| TGME49_251510 | p.Pro139Gln  | missense_variant                               | Ulp1 protease family, C-terminal catalytic domain-containing protein |
| TGME49_277550 | p.Gln33His   | missense_variant                               | UvrD/REP helicase domain-containing protein                          |
| TGME49_277550 | p.Glu217Gly  | missense_variant                               | UvrD/REP helicase domain-containing protein                          |
| TGME49_277550 | p.Ala256Asp  | missense_variant                               | UvrD/REP helicase domain-containing protein                          |
| TGME49_277550 | p.Thr324Lys  | missense_variant                               | UvrD/REP helicase domain-containing protein                          |
| TGME49_277550 | p.Ser472Pro  | missense_variant                               | UvrD/REP helicase domain-containing protein                          |
| TGME49_277550 | p.Thr962Lys  | missense_variant                               | UvrD/REP helicase domain-containing protein                          |
| TGME49_277550 | p.Ala979Ser  | missense_variant                               | UvrD/REP helicase domain-containing protein                          |
| TGME49_277550 | p.Ala1138Val | missense_variant                               | UvrD/REP helicase domain-containing protein                          |
| TGME49_277550 | p.Gly1268Arg | missense_variant                               | UvrD/REP helicase domain-containing protein                          |
| TGME49_277550 | p.Ile1527Asn | missense_variant                               | UvrD/REP helicase domain-containing protein                          |
| TGME49_277550 | p.Glu1677Gln | missense_variant                               | UvrD/REP helicase domain-containing protein                          |
| TGME49_277550 | p.Arg1853His | missense_variant                               | UvrD/REP helicase domain-containing protein                          |
| TGME49_277550 | p.Asp2002His | missense_variant                               | UvrD/REP helicase domain-containing protein                          |
| TGME49_277550 | p.Glu2131Asp | missense_variant                               | UvrD/REP helicase domain-containing protein                          |
| TGME49_277550 | p.Glu2187Asp | missense_variant                               | UvrD/REP helicase domain-containing protein                          |

|               |              |                                                |                                                    |
|---------------|--------------|------------------------------------------------|----------------------------------------------------|
| TGME49_277550 | p.Gln2669His | missense_variant                               | UvrD/REP helicase domain-containing protein        |
| TGME49_277550 | p.Ser2739Thr | missense_variant                               | UvrD/REP helicase domain-containing protein        |
| TGME49_277550 | p.Thr2927Ala | missense_variant                               | UvrD/REP helicase domain-containing protein        |
| TGME49_277550 | p.Ala2948Ser | missense_variant                               | UvrD/REP helicase domain-containing protein        |
| TGME49_277550 | p.Tyr2953His | missense_variant                               | UvrD/REP helicase domain-containing protein        |
| TGME49_277550 | p.Ser3126Phe | missense_variant                               | UvrD/REP helicase domain-containing protein        |
| TGME49_277550 | p.Ser3144Phe | missense_variant                               | UvrD/REP helicase domain-containing protein        |
| TGME49_248670 | c.-1802T>C   | 5_prime_UTR_premature_start_codon_gain_variant | V-type H(+)-translocating pyrophosphatase VP1      |
| TGME49_248670 | c.-350G>A    | 5_prime_UTR_premature_start_codon_gain_variant | V-type H(+)-translocating pyrophosphatase VP1      |
| TGME49_212310 | c.244+3G>T   | splice_region_variant                          | vacuolar ATP synthetase                            |
| TGME49_297230 | p.Ala1016Val | missense_variant                               | Vps53 family, N-terminal protein                   |
| TGME49_247790 | p.Thr203Ile  | missense_variant                               | VRR-NUC domain-containing protein                  |
| TGME49_247790 | p.Glu390Asp  | missense_variant                               | VRR-NUC domain-containing protein                  |
| TGME49_247790 | p.Ser752Thr  | missense_variant                               | VRR-NUC domain-containing protein                  |
| TGME49_247790 | p.Val856Ala  | missense_variant                               | VRR-NUC domain-containing protein                  |
| TGME49_247790 | p.Val1012Leu | missense_variant                               | VRR-NUC domain-containing protein                  |
| TGME49_247790 | p.Gly1243Asp | missense_variant                               | VRR-NUC domain-containing protein                  |
| TGME49_247790 | p.Asp1668Gly | missense_variant                               | VRR-NUC domain-containing protein                  |
| TGME49_247790 | p.Gly1671Arg | missense_variant                               | VRR-NUC domain-containing protein                  |
| TGME49_247790 | p.Lys2027Glu | missense_variant                               | VRR-NUC domain-containing protein                  |
| TGME49_247790 | p.Arg2054Pro | missense_variant                               | VRR-NUC domain-containing protein                  |
| TGME49_247790 | p.Asn2759Ser | missense_variant                               | VRR-NUC domain-containing protein                  |
| TGME49_299080 | p.Gln376Glu  | missense_variant                               | VTC domain-containing protein                      |
| TGME49_320210 | c.-1042C>A   | 5_prime_UTR_premature_start_codon_gain_variant | WD domain, G-beta repeat domain containing protein |
| TGME49_221890 | p.Ala582Thr  | missense_variant                               | WD domain, G-beta repeat-containing protein        |
| TGME49_221890 | c.1443+8G>C  | splice_region_variant                          | WD domain, G-beta repeat-containing protein        |
| TGME49_221890 | c.1443+6T>C  | splice_region_variant                          | WD domain, G-beta repeat-containing protein        |
| TGME49_221890 | c.1020+4G>A  | splice_region_variant                          | WD domain, G-beta repeat-containing protein        |
| TGME49_221890 | c.27+2T>C    | splice_donor_variant                           | WD domain, G-beta repeat-containing protein        |
| TGME49_253060 | p.Pro268Ser  | missense_variant                               | WD domain, G-beta repeat-containing protein        |
| TGME49_253060 | p.Arg562Pro  | missense_variant                               | WD domain, G-beta repeat-containing protein        |
| TGME49_253060 | p.Glu606Gly  | missense_variant                               | WD domain, G-beta repeat-containing protein        |
| TGME49_253060 | p.Leu634Val  | missense_variant                               | WD domain, G-beta repeat-containing protein        |
| TGME49_319910 | p.Arg388Gln  | missense_variant                               | WD domain, G-beta repeat-containing protein        |
| TGME49_319910 | c.232-6G>A   | splice_region_variant                          | WD domain, G-beta repeat-containing protein        |
| TGME49_319910 | c.-81C>G     | 5_prime_UTR_premature_start_codon_gain_variant | WD domain, G-beta repeat-containing protein        |
| TGME49_319570 | p.Ser236Thr  | missense_variant                               | WD domain, G-beta repeat-containing protein        |
| TGME49_319570 | c.1095-5C>T  | splice_region_variant                          | WD domain, G-beta repeat-containing protein        |
| TGME49_223262 | p.Ala96Thr   | missense_variant                               | WD domain, G-beta repeat-containing protein        |
| TGME49_214200 | p.Asp1293Glu | missense_variant                               | WD domain, G-beta repeat-containing protein        |
| TGME49_214200 | p.Ser780Pro  | missense_variant                               | WD domain, G-beta repeat-containing protein        |
| TGME49_214200 | p.Ser402Arg  | missense_variant                               | WD domain, G-beta repeat-containing protein        |
| TGME49_214200 | c.-13G>T     | 5_prime_UTR_premature_start_codon_gain_variant | WD domain, G-beta repeat-containing protein        |
| TGME49_219450 | p.Arg1446Ser | missense_variant                               | WD domain, G-beta repeat-containing protein        |
| TGME49_219450 | p.Val1965Met | missense_variant                               | WD domain, G-beta repeat-containing protein        |
| TGME49_219450 | p.Ser2064Leu | missense_variant                               | WD domain, G-beta repeat-containing protein        |
| TGME49_219450 | p.Pro2095Ser | missense_variant                               | WD domain, G-beta repeat-containing protein        |
| TGME49_218420 | c.1048+8C>G  | splice_region_variant                          | WD domain, G-beta repeat-containing protein        |
| TGME49_218420 | p.Thr2Ala    | missense_variant                               | WD domain, G-beta repeat-containing protein        |
| TGME49_245752 | p.Thr1591Ile | missense_variant                               | WD domain, G-beta repeat-containing protein        |
| TGME49_245752 | p.Leu1581His | missense_variant                               | WD domain, G-beta repeat-containing protein        |
| TGME49_245752 | p.Ala1359Gly | missense_variant                               | WD domain, G-beta repeat-containing protein        |
| TGME49_245752 | p.Ser1135Ala | missense_variant                               | WD domain, G-beta repeat-containing protein        |
| TGME49_245752 | p.Asp1112Gly | missense_variant                               | WD domain, G-beta repeat-containing protein        |
| TGME49_245752 | p.Gln1100His | missense_variant                               | WD domain, G-beta repeat-containing protein        |
| TGME49_245752 | p.Ile1070Phe | missense_variant                               | WD domain, G-beta repeat-containing protein        |
| TGME49_245752 | p.Ser862Tyr  | missense_variant                               | WD domain, G-beta repeat-containing protein        |
| TGME49_245752 | p.Val586Ala  | missense_variant                               | WD domain, G-beta repeat-containing protein        |
| TGME49_248290 | p.Asp514His  | missense_variant                               | WD domain, G-beta repeat-containing protein        |
| TGME49_248290 | p.Lys708Asn  | missense_variant                               | WD domain, G-beta repeat-containing protein        |
| TGME49_248290 | p.Ser1002Gly | missense_variant                               | WD domain, G-beta repeat-containing protein        |
| TGME49_248290 | p.Leu1043Val | missense_variant                               | WD domain, G-beta repeat-containing protein        |
| TGME49_248290 | p.Pro1281Leu | missense_variant                               | WD domain, G-beta repeat-containing protein        |
| TGME49_248290 | p.Ile1336Val | missense_variant                               | WD domain, G-beta repeat-containing protein        |
| TGME49_248290 | p.Arg1392Leu | missense_variant                               | WD domain, G-beta repeat-containing protein        |
| TGME49_248290 | p.Ser1741Thr | missense_variant                               | WD domain, G-beta repeat-containing protein        |
| TGME49_248290 | p.Ser1741Leu | missense_variant                               | WD domain, G-beta repeat-containing protein        |
| TGME49_248290 | p.Pro2145Arg | missense_variant                               | WD domain, G-beta repeat-containing protein        |
| TGME49_248290 | p.Asp2268Asn | missense_variant                               | WD domain, G-beta repeat-containing protein        |
| TGME49_248290 | p.Asn2282His | missense_variant                               | WD domain, G-beta repeat-containing protein        |
| TGME49_248290 | p.Val2393Met | missense_variant                               | WD domain, G-beta repeat-containing protein        |
| TGME49_248290 | p.Thr2404Arg | missense_variant                               | WD domain, G-beta repeat-containing protein        |
| TGME49_248290 | p.Ala2444Thr | missense_variant                               | WD domain, G-beta repeat-containing protein        |
| TGME49_248290 | p.Pro2445Thr | missense_variant                               | WD domain, G-beta repeat-containing protein        |
| TGME49_248290 | p.Leu2495Pro | missense_variant                               | WD domain, G-beta repeat-containing protein        |
| TGME49_248290 | p.Lys2611Met | missense_variant                               | WD domain, G-beta repeat-containing protein        |
| TGME49_248290 | p.Pro2670Leu | missense_variant                               | WD domain, G-beta repeat-containing protein        |
| TGME49_248290 | p.Gly2901Asp | missense_variant                               | WD domain, G-beta repeat-containing protein        |
| TGME49_248290 | p.Ala3080Thr | missense_variant                               | WD domain, G-beta repeat-containing protein        |
| TGME49_248290 | p.Gly3137Arg | missense_variant                               | WD domain, G-beta repeat-containing protein        |
| TGME49_248290 | p.Glu3155Asp | missense_variant                               | WD domain, G-beta repeat-containing protein        |
| TGME49_249460 | p.Ala117Glu  | missense_variant                               | WD domain, G-beta repeat-containing protein        |
| TGME49_249460 | p.Gln149Arg  | missense_variant                               | WD domain, G-beta repeat-containing protein        |
| TGME49_249460 | p.Thr308Met  | missense_variant                               | WD domain, G-beta repeat-containing protein        |
| TGME49_249460 | p.Pro745Leu  | missense_variant                               | WD domain, G-beta repeat-containing protein        |



|               |              |                                                |                                                                 |
|---------------|--------------|------------------------------------------------|-----------------------------------------------------------------|
| TGME49_249460 | p.Glu967Gly  | missense_variant                               | WD domain, G-beta repeat-containing protein                     |
| TGME49_249460 | p.Glu970Gly  | missense_variant                               | WD domain, G-beta repeat-containing protein                     |
| TGME49_249460 | p.Gly1071Asp | missense_variant                               | WD domain, G-beta repeat-containing protein                     |
| TGME49_249460 | p.Ala1123Thr | missense_variant                               | WD domain, G-beta repeat-containing protein                     |
| TGME49_249460 | p.Ser1147Phe | missense_variant                               | WD domain, G-beta repeat-containing protein                     |
| TGME49_249460 | p.Thr1196Ala | missense_variant                               | WD domain, G-beta repeat-containing protein                     |
| TGME49_249460 | p.Thr1196Ile | missense_variant                               | WD domain, G-beta repeat-containing protein                     |
| TGME49_249460 | p.Pro1336His | missense_variant                               | WD domain, G-beta repeat-containing protein                     |
| TGME49_278280 | c.-744C>T    | 5_prime_UTR_premature_start_codon_gain_variant | WD domain, G-beta repeat-containing protein                     |
| TGME49_234610 | c.-2299A>T   | 5_prime_UTR_premature_start_codon_gain_variant | WD-40 repeat protein                                            |
| TGME49_234610 | c.-657C>T    | 5_prime_UTR_premature_start_codon_gain_variant | WD-40 repeat protein                                            |
| TGME49_251670 | c.-829C>G    | 5_prime_UTR_premature_start_codon_gain_variant | werner helicase interacting protein 1, putative                 |
| TGME49_251670 | p.Gly28Ser   | missense_variant                               | werner helicase interacting protein 1, putative                 |
| TGME49_251670 | p.Val160Asp  | missense_variant                               | werner helicase interacting protein 1, putative                 |
| TGME49_251670 | p.Leu200Val  | missense_variant                               | werner helicase interacting protein 1, putative                 |
| TGME49_251670 | p.Leu200His  | missense_variant                               | werner helicase interacting protein 1, putative                 |
| TGME49_251670 | p.Cys205Ser  | missense_variant                               | werner helicase interacting protein 1, putative                 |
| TGME49_251670 | p.Phe211Ser  | missense_variant                               | werner helicase interacting protein 1, putative                 |
| TGME49_251670 | p.His367Asn  | missense_variant                               | werner helicase interacting protein 1, putative                 |
| TGME49_251670 | p.Asp386Glu  | missense_variant                               | werner helicase interacting protein 1, putative                 |
| TGME49_251670 | p.Gly402Asp  | missense_variant                               | werner helicase interacting protein 1, putative                 |
| TGME49_251670 | p.Lys404Arg  | missense_variant                               | werner helicase interacting protein 1, putative                 |
| TGME49_251670 | p.Arg466Lys  | missense_variant                               | werner helicase interacting protein 1, putative                 |
| TGME49_251670 | p.Ala558Thr  | missense_variant                               | werner helicase interacting protein 1, putative                 |
| TGME49_251670 | c.1909-5T>C  | splice_region_variant                          | werner helicase interacting protein 1, putative                 |
| TGME49_251670 | p.Ser891Gly  | missense_variant                               | werner helicase interacting protein 1, putative                 |
| TGME49_215440 | p.Arg509Ile  | missense_variant                               | WWE domain-containing protein                                   |
| TGME49_215440 | p.Ser302Asn  | missense_variant                               | WWE domain-containing protein                                   |
| TGME49_300650 | p.Glu103Lys  | missense_variant                               | ycf24 family protein, putative                                  |
| TGME49_253170 | p.Ser118Tyr  | missense_variant                               | zinc carboxypeptidase, putative                                 |
| TGME49_253170 | c.2854+7T>G  | splice_region_variant                          | zinc carboxypeptidase, putative                                 |
| TGME49_253170 | p.Arg1552Leu | missense_variant                               | zinc carboxypeptidase, putative                                 |
| TGME49_253790 | p.Ala40Val   | missense_variant                               | zinc finger (CCCH type) motif-containing protein                |
| TGME49_253790 | p.Ser1284Leu | missense_variant                               | zinc finger (CCCH type) motif-containing protein                |
| TGME49_224630 | p.Gly1821Asp | missense_variant                               | zinc finger (CCCH type) motif-containing protein                |
| TGME49_224630 | p.Asp1751Val | missense_variant                               | zinc finger (CCCH type) motif-containing protein                |
| TGME49_224630 | p.Ala1712Thr | missense_variant                               | zinc finger (CCCH type) motif-containing protein                |
| TGME49_224630 | p.Val1468Ala | missense_variant                               | zinc finger (CCCH type) motif-containing protein                |
| TGME49_224630 | p.Val1468Leu | missense_variant                               | zinc finger (CCCH type) motif-containing protein                |
| TGME49_224630 | p.Ser1033Pro | missense_variant                               | zinc finger (CCCH type) motif-containing protein                |
| TGME49_224630 | p.Asp657Gly  | missense_variant                               | zinc finger (CCCH type) motif-containing protein                |
| TGME49_224630 | p.Thr382Pro  | missense_variant                               | zinc finger (CCCH type) motif-containing protein                |
| TGME49_224630 | p.Thr379Met  | missense_variant                               | zinc finger (CCCH type) motif-containing protein                |
| TGME49_224630 | p.Gln358Arg  | missense_variant                               | zinc finger (CCCH type) motif-containing protein                |
| TGME49_219120 | c.-260A>G    | 5_prime_UTR_premature_start_codon_gain_variant | zinc finger (CCCH type) motif-containing protein                |
| TGME49_219120 | p.Ser389Gly  | missense_variant                               | zinc finger (CCCH type) motif-containing protein                |
| TGME49_219120 | p.Glu851Asp  | missense_variant                               | zinc finger (CCCH type) motif-containing protein                |
| TGME49_246200 | p.Cys770Ser  | missense_variant                               | zinc finger (CCCH type) motif-containing protein                |
| TGME49_248270 | p.Pro325Ser  | missense_variant                               | zinc finger (CCCH type) motif-containing protein                |
| TGME49_248270 | p.Ala484Val  | missense_variant                               | zinc finger (CCCH type) motif-containing protein                |
| TGME49_248270 | p.Gly803Asp  | missense_variant                               | zinc finger (CCCH type) motif-containing protein                |
| TGME49_250690 | p.Pro35Gln   | missense_variant                               | zinc finger (CCCH type) motif-containing protein                |
| TGME49_250690 | p.Gly560Ala  | missense_variant                               | zinc finger (CCCH type) motif-containing protein                |
| TGME49_250690 | p.Ser1368Arg | missense_variant                               | zinc finger (CCCH type) motif-containing protein                |
| TGME49_250690 | p.Arg1440His | missense_variant                               | zinc finger (CCCH type) motif-containing protein                |
| TGME49_250690 | p.Ala1816Thr | missense_variant                               | zinc finger (CCCH type) motif-containing protein                |
| TGME49_250690 | p.Trp1996Ser | missense_variant                               | zinc finger (CCCH type) motif-containing protein                |
| TGME49_250690 | p.Pro2100Arg | missense_variant                               | zinc finger (CCCH type) motif-containing protein                |
| TGME49_250690 | p.Ser2201Ala | missense_variant                               | zinc finger (CCCH type) motif-containing protein                |
| TGME49_250690 | p.Ser2513Pro | missense_variant                               | zinc finger (CCCH type) motif-containing protein                |
| TGME49_250690 | p.Leu2537Ser | missense_variant                               | zinc finger (CCCH type) motif-containing protein                |
| TGME49_250690 | p.Asp2701Gly | missense_variant                               | zinc finger (CCCH type) motif-containing protein                |
| TGME49_250690 | p.Gly2735Arg | missense_variant                               | zinc finger (CCCH type) motif-containing protein                |
| TGME49_250690 | p.Glu2774Asp | missense_variant                               | zinc finger (CCCH type) motif-containing protein                |
| TGME49_295658 | p.Ala1576Thr | missense_variant                               | zinc finger in N-recogin protein                                |
| TGME49_278800 | p.Phe1824Val | missense_variant                               | zinc finger protein 36 family 3 protein                         |
| TGME49_278800 | p.Arg1822His | missense_variant                               | zinc finger protein 36 family 3 protein                         |
| TGME49_278800 | p.Pro1666Ser | missense_variant                               | zinc finger protein 36 family 3 protein                         |
| TGME49_278800 | p.Ile1306Thr | missense_variant                               | zinc finger protein 36 family 3 protein                         |
| TGME49_278800 | p.Pro1295Leu | missense_variant                               | zinc finger protein 36 family 3 protein                         |
| TGME49_278800 | p.Ala1263Ser | missense_variant                               | zinc finger protein 36 family 3 protein                         |
| TGME49_278800 | p.Leu1222Phe | missense_variant                               | zinc finger protein 36 family 3 protein                         |
| TGME49_278800 | p.Ala1177Pro | missense_variant                               | zinc finger protein 36 family 3 protein                         |
| TGME49_278800 | p.Arg1102Gln | missense_variant                               | zinc finger protein 36 family 3 protein                         |
| TGME49_278800 | p.Thr954Lys  | missense_variant                               | zinc finger protein 36 family 3 protein                         |
| TGME49_223880 | p.Asp1970Asn | missense_variant                               | zinc finger, C3HC4 type (RING finger) domain-containing protein |
| TGME49_223880 | p.Glu1804Val | missense_variant                               | zinc finger, C3HC4 type (RING finger) domain-containing protein |
| TGME49_223880 | p.Pro1199Ser | missense_variant                               | zinc finger, C3HC4 type (RING finger) domain-containing protein |
| TGME49_223880 | p.Ala1151Val | missense_variant                               | zinc finger, C3HC4 type (RING finger) domain-containing protein |
| TGME49_223880 | p.Glu1097Asp | missense_variant                               | zinc finger, C3HC4 type (RING finger) domain-containing protein |
| TGME49_223880 | p.Ala570Thr  | missense_variant                               | zinc finger, C3HC4 type (RING finger) domain-containing protein |
| TGME49_223880 | p.Gly547Glu  | missense_variant                               | zinc finger, C3HC4 type (RING finger) domain-containing protein |
| TGME49_223880 | p.Arg427Gln  | missense_variant                               | zinc finger, C3HC4 type (RING finger) domain-containing protein |
| TGME49_223880 | p.Ala193Thr  | missense_variant                               | zinc finger, C3HC4 type (RING finger) domain-containing protein |
| TGME49_236640 | c.-492A>G    | 5_prime_UTR_premature_start_codon_gain_variant | zinc finger, C3HC4 type (RING finger) domain-containing protein |

|               |              |                                                |                                                                 |
|---------------|--------------|------------------------------------------------|-----------------------------------------------------------------|
| TGME49_236640 | p.Ser274Gly  | missense_variant                               | zinc finger, C3HC4 type (RING finger) domain-containing protein |
| TGME49_236780 | p.Tyr347Phe  | missense_variant                               | zinc finger, C3HC4 type (RING finger) domain-containing protein |
| TGME49_215640 | p.Pro849Arg  | missense_variant                               | zinc finger, C3HC4 type (RING finger) domain-containing protein |
| TGME49_215640 | p.Glu745Asp  | missense_variant                               | zinc finger, C3HC4 type (RING finger) domain-containing protein |
| TGME49_215640 | p.Asn448Ser  | missense_variant                               | zinc finger, C3HC4 type (RING finger) domain-containing protein |
| TGME49_215640 | c.-2021G>A   | 5_prime_UTR_premature_start_codon_gain_variant | zinc finger, C3HC4 type (RING finger) domain-containing protein |
| TGME49_247485 | p.Ser837Tyr  | missense_variant                               | zinc finger, C3HC4 type (RING finger) domain-containing protein |
| TGME49_247485 | p.Asp858Glu  | missense_variant                               | zinc finger, C3HC4 type (RING finger) domain-containing protein |
| TGME49_247485 | p.Val942Gly  | missense_variant                               | zinc finger, C3HC4 type (RING finger) domain-containing protein |
| TGME49_248330 | p.Cys8Phe    | missense_variant&splice_region_variant         | zinc finger, C3HC4 type (RING finger) domain-containing protein |
| TGME49_277740 | p.Arg1558Pro | missense_variant                               | zinc finger, C3HC4 type (RING finger) domain-containing protein |
| TGME49_277740 | p.Glu1519Asp | missense_variant                               | zinc finger, C3HC4 type (RING finger) domain-containing protein |
| TGME49_277740 | p.Ile1518Met | missense_variant                               | zinc finger, C3HC4 type (RING finger) domain-containing protein |
| TGME49_277740 | p.Val1447Met | missense_variant                               | zinc finger, C3HC4 type (RING finger) domain-containing protein |
| TGME49_277740 | p.Ala1315Gly | missense_variant                               | zinc finger, C3HC4 type (RING finger) domain-containing protein |
| TGME49_277740 | p.Pro1233Ala | missense_variant                               | zinc finger, C3HC4 type (RING finger) domain-containing protein |
| TGME49_277740 | p.Asn1093Thr | missense_variant                               | zinc finger, C3HC4 type (RING finger) domain-containing protein |
| TGME49_277740 | p.Ser379Pro  | missense_variant                               | zinc finger, C3HC4 type (RING finger) domain-containing protein |
| TGME49_277740 | p.Thr121Ala  | missense_variant                               | zinc finger, C3HC4 type (RING finger) domain-containing protein |
| TGME49_277740 | c.-232T>C    | 5_prime_UTR_premature_start_codon_gain_variant | zinc finger, C3HC4 type (RING finger) domain-containing protein |
| TGME49_250780 | p.Val2015Leu | missense_variant                               | Zn-finger in ubiquitin-hydrolases domain-containing protein     |
| TGME49_250780 | p.Leu1648Phe | missense_variant                               | Zn-finger in ubiquitin-hydrolases domain-containing protein     |
| TGME49_250780 | p.Ser1440Asn | missense_variant                               | Zn-finger in ubiquitin-hydrolases domain-containing protein     |
| TGME49_250780 | p.Ala1428Gly | missense_variant                               | Zn-finger in ubiquitin-hydrolases domain-containing protein     |
| TGME49_250780 | p.Thr1281Ala | missense_variant                               | Zn-finger in ubiquitin-hydrolases domain-containing protein     |
| TGME49_250780 | p.Pro1279Ser | missense_variant                               | Zn-finger in ubiquitin-hydrolases domain-containing protein     |
| TGME49_250780 | p.Ala602Thr  | missense_variant                               | Zn-finger in ubiquitin-hydrolases domain-containing protein     |
| TGME49_250780 | p.Arg381Gly  | missense_variant                               | Zn-finger in ubiquitin-hydrolases domain-containing protein     |
| TGME49_250780 | p.Met375Val  | missense_variant                               | Zn-finger in ubiquitin-hydrolases domain-containing protein     |
| TGME49_250780 | p.Pro367Gln  | missense_variant                               | Zn-finger in ubiquitin-hydrolases domain-containing protein     |
| TGME49_253925 | p.Cys311*    | stop_gained                                    | zonadhesin family protein                                       |
| TGME49_308040 | c.-7C>T      | splice_region_variant                          | ZPR1 zinc finger domain-containing protein                      |
| TGME49_308040 | c.-487C>T    | 5_prime_UTR_premature_start_codon_gain_variant | ZPR1 zinc finger domain-containing protein                      |

**Supplementary Table S1B: GO Slim (Biological process) analysis of T. gondii genes carrying potential change-of-function mutations in E or TgCatBr1 strains compared to reference strain ME49**

| GO term                               | GO genes                                                                                                                                                                                                                                                                                                                                                                                                                                                                                                                                                                                                                                                                                                                                                                                                                                                                                                                                                                                                                                                                                                                                                                                                                                                                                                                                                                                                                                                                                                                                                                                                                                                                                                                                                                                                                                                                                                                                                                                                                                                                                                                                                                                                                                                                                                                                                                                                                                                                                                                                                                                                                                                                                                                                                                                                                                                                                                                                                                                                                                                                                                                                                                                                                                                                                                                                                                                                                                                                                                                                                                                                                                                                                                                                                                                                                                                                                                                                                                                                                                                                                                                                                    |
|---------------------------------------|-------------------------------------------------------------------------------------------------------------------------------------------------------------------------------------------------------------------------------------------------------------------------------------------------------------------------------------------------------------------------------------------------------------------------------------------------------------------------------------------------------------------------------------------------------------------------------------------------------------------------------------------------------------------------------------------------------------------------------------------------------------------------------------------------------------------------------------------------------------------------------------------------------------------------------------------------------------------------------------------------------------------------------------------------------------------------------------------------------------------------------------------------------------------------------------------------------------------------------------------------------------------------------------------------------------------------------------------------------------------------------------------------------------------------------------------------------------------------------------------------------------------------------------------------------------------------------------------------------------------------------------------------------------------------------------------------------------------------------------------------------------------------------------------------------------------------------------------------------------------------------------------------------------------------------------------------------------------------------------------------------------------------------------------------------------------------------------------------------------------------------------------------------------------------------------------------------------------------------------------------------------------------------------------------------------------------------------------------------------------------------------------------------------------------------------------------------------------------------------------------------------------------------------------------------------------------------------------------------------------------------------------------------------------------------------------------------------------------------------------------------------------------------------------------------------------------------------------------------------------------------------------------------------------------------------------------------------------------------------------------------------------------------------------------------------------------------------------------------------------------------------------------------------------------------------------------------------------------------------------------------------------------------------------------------------------------------------------------------------------------------------------------------------------------------------------------------------------------------------------------------------------------------------------------------------------------------------------------------------------------------------------------------------------------------------------------------------------------------------------------------------------------------------------------------------------------------------------------------------------------------------------------------------------------------------------------------------------------------------------------------------------------------------------------------------------------------------------------------------------------------------------------------------|
| biological_process (others)           | <p>TGME49_207070, TGME49_207080, TGME49_207180, TGME49_210790, TGME49_210800, TGME49_210830, TGME49_211050, TGME49_211090, TGME49_211230, TGME49_211240, TGME49_211390, TGME49_211400, TGME49_211670, TGME49_211720, TGME49_211730, TGME49_211910, TGME49_212100, TGME49_212110, TGME49_212130, TGME49_214260, TGME49_214280, TGME49_214490, TGME49_214840, TGME49_215030, TGME49_215150, TGME49_215260, TGME49_215480, TGME49_215510, TGME49_215560, TGME49_215570, TGME49_215750, TGME49_217350, TGME49_217440, TGME49_217450, TGME49_217700, TGME49_217850, TGME49_218210, TGME49_218250, TGME49_218410, TGME49_218420, TGME49_218470, TGME49_218560, TGME49_218580, TGME49_218590, TGME49_218610, TGME49_218610, TGME49_218960, TGME49_219070, TGME49_219100, TGME49_219180, TGME49_219200, TGME49_219230, TGME49_219240, TGME49_219250, TGME49_219260, TGME49_219310, TGME49_219550, TGME49_219620, TGME49_219832, TGME49_220940, TGME49_221160, TGME49_221200, TGME49_221230, TGME49_221380, TGME49_221420, TGME49_221500, TGME49_221540, TGME49_221580, TGME49_221590, TGME49_221660, TGME49_221890, TGME49_222010, TGME49_222140, TGME49_222160, TGME49_222340, TGME49_222430, TGME49_222840, TGME49_223130, TGME49_223440, TGME49_223690, TGME49_223840, TGME49_223985, TGME49_224060, TGME49_224090, TGME49_224190, TGME49_224220, TGME49_224240, TGME49_224290, TGME49_224310, TGME49_224840, TGME49_224880, TGME49_224890, TGME49_224910, TGME49_224920, TGME49_224928, TGME49_234190, TGME49_234280, TGME49_234490, TGME49_234640, TGME49_235000, TGME49_235020, TGME49_235470, TGME49_235610, TGME49_235680, TGME49_235905, TGME49_235920, TGME49_236040, TGME49_236130, TGME49_236240, TGME49_236260, TGME49_236650, TGME49_236860, TGME49_236980, TGME49_236990, TGME49_237020, TGME49_237090, TGME49_237410, TGME49_237470, TGME49_237500, TGME49_238040, TGME49_238050, TGME49_239020, TGME49_239130, TGME49_239440, TGME49_239480, TGME49_239530, TGME49_239560, TGME49_239630, TGME49_239710, TGME49_239748, TGME49_239820, TGME49_239910, TGME49_245510, TGME49_245670, TGME49_246510, TGME49_246530, TGME49_246650, TGME49_246690, TGME49_246740, TGME49_246910, TGME49_246970, TGME49_247250, TGME49_247360, TGME49_247390, TGME49_247500, TGME49_247590, TGME49_247600, TGME49_247690, TGME49_247700, TGME49_247750, TGME49_247770, TGME49_247780, TGME49_247790, TGME49_248110, TGME49_248200, TGME49_248400, TGME49_248600, TGME49_248670, TGME49_248830, TGME49_248890, TGME49_248960, TGME49_249010, TGME49_249020, TGME49_249180, TGME49_249260, TGME49_249270, TGME49_249380, TGME49_249460, TGME49_249630, TGME49_249810, TGME49_249820, TGME49_249840, TGME49_250750, TGME49_250780, TGME49_250870, TGME49_251480, TGME49_251620, TGME49_251640, TGME49_251740, TGME49_252420, TGME49_252465, TGME49_253030, TGME49_253040, TGME49_253070, TGME49_253090, TGME49_253380, TGME49_253480, TGME49_253890, TGME49_253900, TGME49_253960, TGME49_254280, TGME49_254350, TGME49_254365, TGME49_254410, TGME49_254420, TGME49_254555, TGME49_254770, TGME49_254880, TGME49_254950, TGME49_257540, TGME49_275600, TGME49_275630, TGME49_276910, TGME49_277030, TGME49_277550, TGME49_277720, TGME49_277760, TGME49_278260, TGME49_278280, TGME49_278500, TGME49_278518, TGME49_278640, TGME49_278660, TGME49_278740, TGME49_278750, TGME49_278780, TGME49_278878, TGME49_278940, TGME49_280600, TGME49_280610, TGME49_280660, TGME49_280700, TGME49_280750, TGME49_280760, TGME49_280780, TGME49_288390, TGME49_294350, TGME49_295710, TGME49_297110, TGME49_297150, TGME49_297640, TGME49_297650, TGME49_297720, TGME49_299020, TGME49_299070, TGME49_299150, TGME49_299168, TGME49_300120, TGME49_300320, TGME49_300340, TGME49_300350, TGME49_301000, TGME49_301010, TGME49_301120, TGME49_301216, TGME49_301370, TGME49_307980, TGME49_318190, TGME49_318260, TGME49_318430, TGME49_318440, TGME49_318460, TGME49_318510, TGME49_318580, TGME49_318610, TGME49_318660, TGME49_318675, TGME49_318710, TGME49_318730, TGME49_318750, TGME49_319090, TGME49_319570, TGME49_319662, TGME49_319710, TGME49_319870, TGME49_319920</p> |
| cellular protein modification process | <p>TGME49_207080, TGME49_210830, TGME49_211260, TGME49_211730, TGME49_214170, TGME49_214920, TGME49_215560, TGME49_215670, TGME49_217850, TGME49_218400, TGME49_218590, TGME49_218720, TGME49_219070, TGME49_219460, TGME49_221230, TGME49_221270, TGME49_221500, TGME49_221590, TGME49_221890, TGME49_222010, TGME49_222430, TGME49_222710, TGME49_222900, TGME49_222960, TGME49_223985, TGME49_224240, TGME49_224480, TGME49_234950, TGME49_234970, TGME49_235020, TGME49_235370, TGME49_235700, TGME49_235750, TGME49_235980, TGME49_236240, TGME49_236260, TGME49_237410, TGME49_237500, TGME49_237860, TGME49_237890, TGME49_238000, TGME49_239130, TGME49_239420, TGME49_239440, TGME49_239600, TGME49_239620, TGME49_239885, TGME49_239910, TGME49_240090, TGME49_245580, TGME49_247710, TGME49_249260, TGME49_249460, TGME49_249680, TGME49_250680, TGME49_250850, TGME49_251850, TGME49_252360, TGME49_252400, TGME49_252440, TGME49_253440, TGME49_253580, TGME49_253860, TGME49_253940, TGME49_254190, TGME49_254410, TGME49_254555, TGME49_275568, TGME49_275610, TGME49_275630, TGME49_278280, TGME49_278900, TGME49_278940, TGME49_280660, TGME49_295710, TGME49_297150, TGME49_297650, TGME49_297720, TGME49_299040, TGME49_301270, TGME49_301440, TGME49_308000, TGME49_308096, TGME49_318240, TGME49_318275, TGME49_318660, TGME49_318770, TGME49_319600, TGME49_319610, TGME49_319700, TGME49_320210</p>                                                                                                                                                                                                                                                                                                                                                                                                                                                                                                                                                                                                                                                                                                                                                                                                                                                                                                                                                                                                                                                                                                                                                                                                                                                                                                                                                                                                                                                                                                                                                                                                                                                                                                                                                                                                                                                                                                                                                                                                                                                                                                                                                                                                                                                                                                                                                                                                                                                                                                                                                                                                                                                                                                                                  |
| biosynthetic process                  | <p>TGME49_210790, TGME49_210960, TGME49_214480, TGME49_214850, TGME49_214920, TGME49_215250, TGME49_215260, TGME49_215700, TGME49_217580, TGME49_217910, TGME49_218560, TGME49_219460, TGME49_219600, TGME49_219700, TGME49_219860, TGME49_221260, TGME49_221320, TGME49_221922, TGME49_222800, TGME49_222900, TGME49_224490, TGME49_234280, TGME49_234580, TGME49_235170, TGME49_235478, TGME49_235640, TGME49_237110, TGME49_237200, TGME49_237480, TGME49_237830, TGME49_238110, TGME49_238190, TGME49_238950, TGME49_239710, TGME49_239820, TGME49_245570, TGME49_246060, TGME49_246530, TGME49_246630, TGME49_248600, TGME49_249180, TGME49_249560, TGME49_250060, TGME49_250880, TGME49_251620, TGME49_251670, TGME49_252440, TGME49_252640, TGME49_253400, TGME49_253780, TGME49_253880, TGME49_253900, TGME49_254280, TGME49_254370, TGME49_254540, TGME49_275568, TGME49_277540, TGME49_278110, TGME49_278740, TGME49_278910, TGME49_280600, TGME49_280690, TGME49_280730, TGME49_280750, TGME49_297530, TGME49_297720, TGME49_297840, TGME49_297925, TGME49_297940, TGME49_299040, TGME49_300650, TGME49_307770, TGME49_308000, TGME49_319860</p>                                                                                                                                                                                                                                                                                                                                                                                                                                                                                                                                                                                                                                                                                                                                                                                                                                                                                                                                                                                                                                                                                                                                                                                                                                                                                                                                                                                                                                                                                                                                                                                                                                                                                                                                                                                                                                                                                                                                                                                                                                                                                                                                                                                                                                                                                                                                                                                                                                                                                                                                                                                                                                                                                                                                                                                                                                                                                                                                                                                                 |
| phosphorylation                       | <p>TGME49_210830, TGME49_211260, TGME49_214260, TGME49_215250, TGME49_215670, TGME49_215700, TGME49_218400, TGME49_218720, TGME49_219100, TGME49_219100, TGME49_219832, TGME49_222020, TGME49_222960, TGME49_224480, TGME49_224900, TGME49_234970, TGME49_235370, TGME49_235478, TGME49_235750, TGME49_236040, TGME49_236240, TGME49_236620, TGME49_237860, TGME49_237890, TGME49_239130, TGME49_239250, TGME49_239420, TGME49_239440, TGME49_239600, TGME49_239885, TGME49_239910, TGME49_240090, TGME49_245580, TGME49_245670, TGME49_245730, TGME49_247710, TGME49_248530, TGME49_249260, TGME49_250680, TGME49_250850, TGME49_250880, TGME49_252360, TGME49_253440, TGME49_253580, TGME49_253860, TGME49_253940, TGME49_254190, TGME49_275610, TGME49_278900, TGME49_297780, TGME49_299070, TGME49_301270, TGME49_301440, TGME49_307770, TGME49_308096, TGME49_318580, TGME49_318770, TGME49_319308, TGME49_319610, TGME49_319700</p>                                                                                                                                                                                                                                                                                                                                                                                                                                                                                                                                                                                                                                                                                                                                                                                                                                                                                                                                                                                                                                                                                                                                                                                                                                                                                                                                                                                                                                                                                                                                                                                                                                                                                                                                                                                                                                                                                                                                                                                                                                                                                                                                                                                                                                                                                                                                                                                                                                                                                                                                                                                                                                                                                                                                                                                                                                                                                                                                                                                                                                                                                                                                                                                                                   |
| translation                           | <p>TGME49_210750, TGME49_210840, TGME49_211230, TGME49_211410, TGME49_211870, TGME49_214270, TGME49_217460, TGME49_217590, TGME49_217620, TGME49_217670, TGME49_218790, TGME49_218850, TGME49_219430, TGME49_219540, TGME49_221670, TGME49_222070, TGME49_222990, TGME49_223660, TGME49_223970, TGME49_224235, TGME49_235540, TGME49_235970, TGME49_238010, TGME49_239100, TGME49_245680, TGME49_250810, TGME49_250955, TGME49_253800, TGME49_254110, TGME49_254200, TGME49_254380, TGME49_254400, TGME49_277030, TGME49_278550, TGME49_280600, TGME49_299810, TGME49_300000, TGME49_300260, TGME49_300606, TGME49_300613, TGME49_301380, TGME49_307980, TGME49_315150, TGME49_317720, TGME49_318260, TGME49_318700, TGME49_320150</p>                                                                                                                                                                                                                                                                                                                                                                                                                                                                                                                                                                                                                                                                                                                                                                                                                                                                                                                                                                                                                                                                                                                                                                                                                                                                                                                                                                                                                                                                                                                                                                                                                                                                                                                                                                                                                                                                                                                                                                                                                                                                                                                                                                                                                                                                                                                                                                                                                                                                                                                                                                                                                                                                                                                                                                                                                                                                                                                                                                                                                                                                                                                                                                                                                                                                                                                                                                                                                      |
| protein metabolic process             | <p>TGME49_200350, TGME49_210730, TGME49_210781, TGME49_211330, TGME49_214470, TGME49_215010, TGME49_218920, TGME49_219485, TGME49_221310, TGME49_221610, TGME49_221830, TGME49_223450, TGME49_224080, TGME49_224350, TGME49_224460, TGME49_235200, TGME49_235680, TGME49_235950, TGME49_240240, TGME49_245500, TGME49_245590, TGME49_246800, TGME49_247240, TGME49_248470, TGME49_248710, TGME49_249670, TGME49_251510, TGME49_251570, TGME49_251760, TGME49_252440, TGME49_253170, TGME49_254010, TGME49_275690, TGME49_277500, TGME49_277895, TGME49_277990, TGME49_278050, TGME49_278975, TGME49_280710, TGME49_280740, TGME49_300020, TGME49_318320, TGME49_319970</p>                                                                                                                                                                                                                                                                                                                                                                                                                                                                                                                                                                                                                                                                                                                                                                                                                                                                                                                                                                                                                                                                                                                                                                                                                                                                                                                                                                                                                                                                                                                                                                                                                                                                                                                                                                                                                                                                                                                                                                                                                                                                                                                                                                                                                                                                                                                                                                                                                                                                                                                                                                                                                                                                                                                                                                                                                                                                                                                                                                                                                                                                                                                                                                                                                                                                                                                                                                                                                                                                                  |
| RNA metabolic process                 | <p>TGME49_211450, TGME49_214200, TGME49_214210, TGME49_217580, TGME49_218570, TGME49_218580, TGME49_219440, TGME49_219600, TGME49_220940, TGME49_221380, TGME49_222120, TGME49_224200, TGME49_237020, TGME49_238190, TGME49_239480, TGME49_239790, TGME49_246060, TGME49_246500, TGME49_246630, TGME49_246760, TGME49_246970, TGME49_247740, TGME49_248200, TGME49_249560, TGME49_249610, TGME49_250060, TGME49_250750, TGME49_251620, TGME49_252465, TGME49_253530, TGME49_254240, TGME49_254450, TGME49_254730, TGME49_254950, TGME49_297530, TGME49_297840, TGME49_298040, TGME49_300320, TGME49_300330, TGME49_301390</p>                                                                                                                                                                                                                                                                                                                                                                                                                                                                                                                                                                                                                                                                                                                                                                                                                                                                                                                                                                                                                                                                                                                                                                                                                                                                                                                                                                                                                                                                                                                                                                                                                                                                                                                                                                                                                                                                                                                                                                                                                                                                                                                                                                                                                                                                                                                                                                                                                                                                                                                                                                                                                                                                                                                                                                                                                                                                                                                                                                                                                                                                                                                                                                                                                                                                                                                                                                                                                                                                                                                               |
| DNA metabolic process                 | <p>TGME49_210960, TGME49_214480, TGME49_214520, TGME49_215550, TGME49_217450, TGME49_217910, TGME49_218840, TGME49_219700, TGME49_219860, TGME49_221330, TGME49_234360, TGME49_234580, TGME49_235170, TGME49_236200, TGME49_237110, TGME49_237480, TGME49_237830, TGME49_238110, TGME49_245570, TGME49_248160, TGME49_248890, TGME49_251620, TGME49_251670, TGME49_253040, TGME49_253070, TGME49_253480, TGME49_277220, TGME49_277530, TGME49_277540, TGME49_278060, TGME49_280690, TGME49_297780, TGME49_297840, TGME49_297940, TGME49_301222, TGME49_319880</p>                                                                                                                                                                                                                                                                                                                                                                                                                                                                                                                                                                                                                                                                                                                                                                                                                                                                                                                                                                                                                                                                                                                                                                                                                                                                                                                                                                                                                                                                                                                                                                                                                                                                                                                                                                                                                                                                                                                                                                                                                                                                                                                                                                                                                                                                                                                                                                                                                                                                                                                                                                                                                                                                                                                                                                                                                                                                                                                                                                                                                                                                                                                                                                                                                                                                                                                                                                                                                                                                                                                                                                                           |

|                                                          |                                                                                                                                                                                                                                                                                                                                                                                                                                                                                                |
|----------------------------------------------------------|------------------------------------------------------------------------------------------------------------------------------------------------------------------------------------------------------------------------------------------------------------------------------------------------------------------------------------------------------------------------------------------------------------------------------------------------------------------------------------------------|
| oxidation-reduction process                              | TGME49_210790, TGME49_214620, TGME49_214760, TGME49_214850, TGME49_215280, TGME49_219130, TGME49_219630, TGME49_221270, TGME49_222160, TGME49_236010, TGME49_237200, TGME49_238070, TGME49_238950, TGME49_239820, TGME49_245670, TGME49_246920, TGME49_247500, TGME49_248990, TGME49_249180, TGME49_249320, TGME49_249390, TGME49_249840, TGME49_251930, TGME49_253120, TGME49_253750, TGME49_253960, TGME49_275420, TGME49_277790, TGME49_280780, TGME49_301210, TGME49_318430, TGME49_320220 |
| cellular nitrogen compound metabolic process             | TGME49_210790, TGME49_215250, TGME49_215260, TGME49_215550, TGME49_217350, TGME49_217910, TGME49_224650, TGME49_224900, TGME49_234190, TGME49_234280, TGME49_235000, TGME49_237020, TGME49_238400, TGME49_246920, TGME49_246970, TGME49_249180, TGME49_250880, TGME49_250890, TGME49_251620, TGME49_253780, TGME49_253900, TGME49_254450, TGME49_275830, TGME49_278060, TGME49_280740, TGME49_300060, TGME49_301216, TGME49_319308, TGME49_319860                                              |
| transmembrane transport                                  | TGME49_212310, TGME49_219260, TGME49_219650, TGME49_221350, TGME49_234410, TGME49_236860, TGME49_239020, TGME49_239080, TGME49_240080, TGME49_240210, TGME49_245510, TGME49_248330, TGME49_248670, TGME49_248840, TGME49_248950, TGME49_249820, TGME49_251630, TGME49_252640, TGME49_253640, TGME49_253700, TGME49_254080, TGME49_278660, TGME49_278800, TGME49_297245, TGME49_299060, TGME49_318150, TGME49_320220                                                                            |
| chromosome organization                                  | TGME49_207080, TGME49_211730, TGME49_214520, TGME49_215560, TGME49_219700, TGME49_219860, TGME49_221330, TGME49_221890, TGME49_234360, TGME49_235020, TGME49_248160, TGME49_248290, TGME49_248890, TGME49_249460, TGME49_249620, TGME49_249680, TGME49_252420, TGME49_253040, TGME49_253480, TGME49_254555, TGME49_277530, TGME49_278280, TGME49_293368, TGME49_297150, TGME49_297780, TGME49_297800                                                                                           |
| transport                                                | TGME49_208420, TGME49_211370, TGME49_212310, TGME49_214770, TGME49_219720, TGME49_221522, TGME49_221940, TGME49_222380, TGME49_235020, TGME49_236020, TGME49_239020, TGME49_239080, TGME49_246330, TGME49_248100, TGME49_248950, TGME49_249170, TGME49_249610, TGME49_249702, TGME49_249820, TGME49_253640, TGME49_275490, TGME49_276910, TGME49_278990, TGME49_280610, TGME49_299060, TGME49_299180                                                                                           |
| cellular amino acid metabolic process                    | TGME49_210750, TGME49_210840, TGME49_215260, TGME49_217460, TGME49_219430, TGME49_219540, TGME49_221260, TGME49_222900, TGME49_234190, TGME49_236010, TGME49_237470, TGME49_239820, TGME49_248600, TGME49_248990, TGME49_249180, TGME49_249390, TGME49_253780, TGME49_254110, TGME49_254200, TGME49_277030, TGME49_278740, TGME49_278910, TGME49_280600, TGME49_299810, TGME49_300260                                                                                                          |
| lipid metabolic process                                  | TGME49_212130, TGME49_214850, TGME49_214920, TGME49_215700, TGME49_218560, TGME49_219230, TGME49_221320, TGME49_224490, TGME49_237200, TGME49_238400, TGME49_238950, TGME49_245730, TGME49_246530, TGME49_247500, TGME49_247760, TGME49_248830, TGME49_252440, TGME49_253880, TGME49_254330, TGME49_254540, TGME49_275568, TGME49_277950, TGME49_299040, TGME49_308000                                                                                                                         |
| ion transport                                            | TGME49_208420, TGME49_212200, TGME49_212310, TGME49_219260, TGME49_221350, TGME49_224190, TGME49_234540, TGME49_235402, TGME49_235880, TGME49_236860, TGME49_240210, TGME49_245510, TGME49_247690, TGME49_248670, TGME49_251630, TGME49_252640, TGME49_253640, TGME49_254080, TGME49_254370, TGME49_278660, TGME49_299060, TGME49_318460, TGME49_319740, TGME49_320220                                                                                                                         |
| response to stress                                       | TGME49_214480, TGME49_214520, TGME49_217450, TGME49_218840, TGME49_234580, TGME49_235170, TGME49_236200, TGME49_237480, TGME49_238110, TGME49_248160, TGME49_248890, TGME49_251620, TGME49_253040, TGME49_253650, TGME49_275690, TGME49_277220, TGME49_277540, TGME49_278060, TGME49_301222, TGME49_319860                                                                                                                                                                                     |
| catabolic process                                        | TGME49_210781, TGME49_218920, TGME49_221610, TGME49_222020, TGME49_223450, TGME49_236010, TGME49_236040, TGME49_237470, TGME49_245670, TGME49_247240, TGME49_247500, TGME49_248710, TGME49_248830, TGME49_248990, TGME49_254350, TGME49_277500, TGME49_277895, TGME49_278050, TGME49_280710, TGME49_299070                                                                                                                                                                                     |
| signal transduction                                      | TGME49_214770, TGME49_215700, TGME49_219540, TGME49_219720, TGME49_224840, TGME49_234970, TGME49_236240, TGME49_239130, TGME49_239250, TGME49_246510, TGME49_248830, TGME49_249170, TGME49_249260, TGME49_250850, TGME49_252880, TGME49_254370, TGME49_277790, TGME49_277840, TGME49_318675                                                                                                                                                                                                    |
| small molecule metabolic process                         | TGME49_210790, TGME49_215260, TGME49_215280, TGME49_218560, TGME49_219550, TGME49_221320, TGME49_234190, TGME49_234280, TGME49_235000, TGME49_238950, TGME49_239630, TGME49_247500, TGME49_247760, TGME49_249180, TGME49_250880, TGME49_253880, TGME49_318430                                                                                                                                                                                                                                  |
| tRNA metabolic process                                   | TGME49_210750, TGME49_210840, TGME49_215100, TGME49_217460, TGME49_218580, TGME49_219430, TGME49_219540, TGME49_223130, TGME49_253530, TGME49_254110, TGME49_254200, TGME49_254730, TGME49_277030, TGME49_280600, TGME49_280780, TGME49_299810, TGME49_300260                                                                                                                                                                                                                                  |
| carbohydrate metabolic process                           | TGME49_222020, TGME49_222800, TGME49_223840, TGME49_235700, TGME49_236040, TGME49_239710, TGME49_245670, TGME49_246690, TGME49_253030, TGME49_253400, TGME49_254880, TGME49_278110, TGME49_297720, TGME49_299070, TGME49_318430, TGME49_318580                                                                                                                                                                                                                                                 |
| nucleotide metabolic process                             | TGME49_222710, TGME49_224900, TGME49_234280, TGME49_235478, TGME49_239310, TGME49_239620, TGME49_239710, TGME49_249180, TGME49_250880, TGME49_254370, TGME49_280750, TGME49_307770, TGME49_318750                                                                                                                                                                                                                                                                                              |
| ribosome biogenesis                                      | TGME49_214200, TGME49_218410, TGME49_218570, TGME49_236580, TGME49_239790, TGME49_248200, TGME49_252465, TGME49_298040, TGME49_300320, TGME49_301390, TGME49_318700, TGME49_319658                                                                                                                                                                                                                                                                                                             |
| cofactor metabolic process                               | TGME49_215250, TGME49_222020, TGME49_234190, TGME49_235478, TGME49_236040, TGME49_239310, TGME49_245670, TGME49_249180, TGME49_253780, TGME49_253900, TGME49_299070, TGME49_307770                                                                                                                                                                                                                                                                                                             |
| transcription, DNA-templated                             | TGME49_217580, TGME49_219600, TGME49_224660, TGME49_238190, TGME49_246060, TGME49_248290, TGME49_249560, TGME49_249680, TGME49_250060, TGME49_254280, TGME49_297530                                                                                                                                                                                                                                                                                                                            |
| vesicle-mediated transport                               | TGME49_211370, TGME49_221522, TGME49_221940, TGME49_224150, TGME49_235020, TGME49_238210, TGME49_238220, TGME49_246610, TGME49_248100, TGME49_278890, TGME49_299180                                                                                                                                                                                                                                                                                                                            |
| homeostatic process                                      | TGME49_218470, TGME49_219130, TGME49_224060, TGME49_238040, TGME49_238070, TGME49_246920, TGME49_247660, TGME49_248160, TGME49_249270, TGME49_277790                                                                                                                                                                                                                                                                                                                                           |
| membrane organization                                    | TGME49_219260, TGME49_224190, TGME49_236130, TGME49_245510, TGME49_247690, TGME49_254370, TGME49_275802, TGME49_280610                                                                                                                                                                                                                                                                                                                                                                         |
| mRNA processing                                          | TGME49_210980, TGME49_219440, TGME49_221190, TGME49_234520, TGME49_238230, TGME49_246760, TGME49_249610, TGME49_297140                                                                                                                                                                                                                                                                                                                                                                         |
| protein folding                                          | TGME49_218470, TGME49_238000, TGME49_238040, TGME49_248370, TGME49_249270, TGME49_253650, TGME49_297500, TGME49_318275                                                                                                                                                                                                                                                                                                                                                                         |
| nucleobase-containing compound catabolic process         | TGME49_239620, TGME49_239630, TGME49_251620, TGME49_253480, TGME49_254450, TGME49_318750                                                                                                                                                                                                                                                                                                                                                                                                       |
| nitrogen compound metabolic process                      | TGME49_215260, TGME49_235183, TGME49_235187, TGME49_237200, TGME49_238880, TGME49_253930                                                                                                                                                                                                                                                                                                                                                                                                       |
| protein targeting                                        | TGME49_236130, TGME49_247652, TGME49_248330, TGME49_275802, TGME49_280610                                                                                                                                                                                                                                                                                                                                                                                                                      |
| cellular component assembly                              | TGME49_217760, TGME49_221922, TGME49_280730, TGME49_297925, TGME49_300650                                                                                                                                                                                                                                                                                                                                                                                                                      |
| cell cycle                                               | TGME49_217760, TGME49_219100, TGME49_219832, TGME49_280750, TGME49_297520                                                                                                                                                                                                                                                                                                                                                                                                                      |
| cellular component organization                          | TGME49_219290, TGME49_247652, TGME49_248330, TGME49_249365, TGME49_250720                                                                                                                                                                                                                                                                                                                                                                                                                      |
| sulfur compound metabolic process                        | TGME49_215250, TGME49_236010, TGME49_246920, TGME49_248990, TGME49_278910                                                                                                                                                                                                                                                                                                                                                                                                                      |
| ATP metabolic process                                    | TGME49_222020, TGME49_236040, TGME49_245670, TGME49_252640, TGME49_299070                                                                                                                                                                                                                                                                                                                                                                                                                      |
| generation of precursor metabolites and energy           | TGME49_222020, TGME49_236040, TGME49_245670, TGME49_299070                                                                                                                                                                                                                                                                                                                                                                                                                                     |
| protein maturation                                       | TGME49_275690, TGME49_280740, TGME49_300060                                                                                                                                                                                                                                                                                                                                                                                                                                                    |
| cell division                                            | TGME49_217760, TGME49_219100, TGME49_219832                                                                                                                                                                                                                                                                                                                                                                                                                                                    |
| cell differentiation                                     | TGME49_211270, TGME49_223480                                                                                                                                                                                                                                                                                                                                                                                                                                                                   |
| cytoskeleton-dependent intracellular transport           | TGME49_249365, TGME49_250720                                                                                                                                                                                                                                                                                                                                                                                                                                                                   |
| cell motility                                            | TGME49_217650, TGME49_248225                                                                                                                                                                                                                                                                                                                                                                                                                                                                   |
| cell projection assembly                                 | TGME49_248970, TGME49_250720                                                                                                                                                                                                                                                                                                                                                                                                                                                                   |
| anatomical structure formation involved in morphogenesis | TGME49_248970, TGME49_250720                                                                                                                                                                                                                                                                                                                                                                                                                                                                   |
| cell morphogenesis                                       | TGME49_248970, TGME49_250720                                                                                                                                                                                                                                                                                                                                                                                                                                                                   |
| mitotic nuclear division                                 | TGME49_246740, TGME49_297800                                                                                                                                                                                                                                                                                                                                                                                                                                                                   |
| ribonucleoprotein complex assembly                       | TGME49_210980, TGME49_318700                                                                                                                                                                                                                                                                                                                                                                                                                                                                   |
| cellular respiration                                     | TGME49_215280, TGME49_219550                                                                                                                                                                                                                                                                                                                                                                                                                                                                   |

|                                      |               |
|--------------------------------------|---------------|
| cell wall organization or biogenesis | TGME49_254350 |
| vacuolar transport                   | TGME49_248310 |
| mitochondrion organization           | TGME49_219540 |
| chromosome segregation               | TGME49_297800 |
| autophagy                            | TGME49_221360 |

**Supplementary Table S2: Differential expression analysis of human genes from HFF hours.**

| gene_ID         | logFC 2h / Uninf | logFC 18h / Uninf | logFC 48h / Uninf | logCPM | PValue   | FDR      |
|-----------------|------------------|-------------------|-------------------|--------|----------|----------|
| ENSG00000004846 | -0.15            | -4.24             | -10.36            | 3.89   | 1.20E-29 | 1.71E-25 |
| ENSG00000196616 | -0.27            | -5.58             | -12.98            | 3.90   | 2.23E-23 | 1.58E-19 |
| ENSG00000169607 | 0.88             | 4.90              | 5.69              | 5.04   | 4.74E-18 | 2.24E-14 |
| ENSG00000089685 | 0.19             | 2.98              | 3.78              | 6.00   | 4.19E-16 | 1.48E-12 |
| ENSG00000131747 | 0.64             | 4.07              | 4.31              | 7.91   | 9.35E-16 | 2.65E-12 |
| ENSG00000101057 | -0.06            | 3.84              | 3.04              | 4.58   | 1.44E-15 | 3.40E-12 |
| ENSG00000148773 | 0.70             | 4.04              | 4.33              | 7.05   | 3.73E-15 | 7.55E-12 |
| ENSG00000170458 | -0.94            | -3.04             | -5.04             | 6.06   | 5.77E-15 | 1.02E-11 |
| ENSG00000138347 | 1.33             | 3.91              | 3.54              | 4.64   | 1.26E-14 | 1.88E-11 |
| ENSG00000138180 | 0.87             | 3.79              | 4.54              | 5.34   | 1.33E-14 | 1.88E-11 |
| ENSG00000078401 | 1.16             | -2.53             | -3.32             | 5.07   | 2.01E-14 | 2.59E-11 |
| ENSG00000154839 | 0.78             | 4.73              | 4.72              | 4.73   | 2.80E-14 | 3.12E-11 |
| ENSG00000068489 | 0.81             | 3.48              | 4.36              | 4.83   | 2.87E-14 | 3.12E-11 |
| ENSG00000123358 | 2.02             | -4.40             | -4.52             | 6.00   | 5.06E-14 | 5.12E-11 |
| ENSG00000145386 | 0.51             | 4.28              | 4.94              | 4.95   | 6.43E-14 | 5.72E-11 |
| ENSG00000072571 | 0.67             | 4.37              | 4.79              | 4.82   | 6.46E-14 | 5.72E-11 |
| ENSG00000092853 | 0.39             | 3.85              | 3.52              | 5.08   | 1.84E-13 | 1.53E-10 |
| ENSG00000093009 | 0.12             | 4.32              | 3.54              | 4.22   | 2.70E-13 | 2.12E-10 |
| ENSG00000142945 | 0.27             | 3.50              | 4.13              | 5.12   | 3.36E-13 | 2.50E-10 |
| ENSG00000169679 | 0.24             | 4.10              | 4.82              | 5.29   | 3.83E-13 | 2.71E-10 |
| ENSG00000111206 | 0.25             | 2.79              | 3.52              | 4.71   | 4.46E-13 | 3.01E-10 |
| ENSG00000109805 | 0.10             | 4.51              | 4.61              | 5.71   | 8.07E-13 | 5.20E-10 |
| ENSG00000088325 | 0.04             | 2.99              | 3.84              | 6.72   | 1.08E-12 | 6.67E-10 |
| ENSG00000117724 | 0.46             | 3.94              | 4.54              | 6.34   | 1.34E-12 | 7.74E-10 |
| ENSG00000101447 | 1.24             | 3.43              | 4.52              | 4.51   | 1.37E-12 | 7.74E-10 |
| ENSG00000168078 | 0.72             | 4.09              | 4.74              | 6.00   | 1.52E-12 | 8.26E-10 |
| ENSG00000161888 | -0.25            | 3.20              | 3.54              | 3.88   | 1.58E-12 | 8.30E-10 |
| ENSG00000237649 | 0.72             | 3.39              | 3.39              | 4.71   | 1.76E-12 | 8.88E-10 |
| ENSG00000111665 | 0.23             | 3.06              | 3.69              | 3.99   | 2.19E-12 | 1.07E-09 |
| ENSG00000138778 | 0.68             | 3.81              | 3.89              | 5.08   | 2.54E-12 | 1.16E-09 |
| ENSG00000196611 | 0.45             | 4.45              | 4.97              | 9.06   | 3.06E-12 | 1.36E-09 |
| ENSG00000146670 | 0.67             | 3.86              | 3.37              | 5.01   | 3.87E-12 | 1.60E-09 |

|                 |       |       |       |       |          |          |
|-----------------|-------|-------|-------|-------|----------|----------|
| ENSG00000198901 | 0.27  | 2.81  | 3.41  | 6.29  | 5.02E-12 | 1.92E-09 |
| ENSG00000186871 | -1.06 | 4.11  | 4.13  | 3.59  | 5.78E-12 | 2.10E-09 |
| ENSG00000090889 | 0.17  | 3.53  | 3.88  | 5.14  | 6.33E-12 | 2.19E-09 |
| ENSG00000112742 | -0.24 | 4.17  | 4.79  | 4.95  | 7.25E-12 | 2.45E-09 |
| ENSG00000165480 | 0.58  | 4.30  | 4.54  | 4.24  | 7.81E-12 | 2.54E-09 |
| ENSG00000164109 | 0.51  | 3.73  | 4.53  | 4.86  | 9.72E-12 | 3.02E-09 |
| ENSG00000076382 | -0.05 | 3.24  | 3.58  | 4.83  | 9.83E-12 | 3.02E-09 |
| ENSG00000119508 | 1.48  | -3.24 | -4.26 | 4.71  | 1.10E-11 | 3.32E-09 |
| ENSG00000143476 | 0.29  | 3.85  | 3.54  | 4.88  | 1.40E-11 | 4.07E-09 |
| ENSG00000107968 | 1.88  | -1.74 | -1.01 | 4.75  | 1.41E-11 | 4.07E-09 |
| ENSG00000198826 | 0.20  | 3.21  | 4.14  | 5.04  | 1.69E-11 | 4.78E-09 |
| ENSG00000013810 | -0.03 | 3.02  | 3.08  | 5.36  | 1.78E-11 | 4.89E-09 |
| ENSG00000172548 | 0.61  | -4.93 | -4.60 | 4.93  | 1.79E-11 | 4.89E-09 |
| ENSG00000137331 | 2.18  | -2.15 | -2.31 | 6.66  | 2.35E-11 | 6.27E-09 |
| ENSG00000024526 | 0.14  | 4.26  | 5.66  | 4.54  | 2.83E-11 | 7.41E-09 |
| ENSG00000112984 | 0.64  | 3.00  | 4.41  | 5.80  | 3.22E-11 | 8.17E-09 |
| ENSG00000166592 | 1.27  | -5.02 | -3.14 | 4.10  | 3.29E-11 | 8.17E-09 |
| ENSG00000158402 | -0.76 | 3.59  | 4.21  | 3.00  | 3.31E-11 | 8.17E-09 |
| ENSG00000108342 | 6.25  | 2.52  | 8.82  | 2.31  | 3.40E-11 | 8.17E-09 |
| ENSG00000171241 | 0.64  | 3.95  | 4.06  | 5.13  | 3.40E-11 | 8.17E-09 |
| ENSG00000122952 | -0.15 | 3.44  | 3.18  | 5.29  | 3.62E-11 | 8.55E-09 |
| ENSG00000163874 | 2.83  | -2.49 | -1.21 | 5.08  | 4.03E-11 | 9.36E-09 |
| ENSG00000131153 | 0.82  | 3.78  | 3.05  | 4.44  | 5.93E-11 | 1.35E-08 |
| ENSG00000167900 | 0.10  | 2.57  | 3.19  | 5.65  | 6.84E-11 | 1.54E-08 |
| ENSG00000143228 | 0.11  | 4.22  | 4.72  | 4.11  | 7.58E-11 | 1.68E-08 |
| ENSG00000149968 | 0.49  | 2.82  | 3.64  | 10.63 | 8.08E-11 | 1.76E-08 |
| ENSG00000241644 | -0.77 | -3.80 | -4.78 | 5.13  | 9.13E-11 | 1.96E-08 |
| ENSG00000117399 | -0.15 | 3.12  | 3.85  | 5.14  | 9.67E-11 | 2.04E-08 |
| ENSG00000175063 | 1.38  | 4.46  | 4.61  | 4.12  | 1.09E-10 | 2.27E-08 |
| ENSG00000134690 | -0.42 | 3.65  | 3.73  | 4.66  | 1.26E-10 | 2.60E-08 |
| ENSG00000154027 | 0.45  | 3.28  | 2.92  | 4.65  | 1.37E-10 | 2.75E-08 |
| ENSG00000122877 | 1.33  | -6.24 | -6.00 | 5.49  | 1.38E-10 | 2.75E-08 |
| ENSG00000183856 | -0.17 | 3.03  | 3.39  | 5.00  | 1.54E-10 | 3.03E-08 |
| ENSG00000205835 | -0.09 | -2.62 | -7.23 | 2.31  | 1.76E-10 | 3.39E-08 |
| ENSG00000011426 | 0.40  | 3.53  | 4.15  | 7.42  | 1.77E-10 | 3.39E-08 |
| ENSG00000071539 | 0.62  | 3.37  | 3.86  | 4.28  | 2.08E-10 | 3.93E-08 |
| ENSG00000080986 | -0.06 | 3.45  | 3.76  | 5.67  | 2.22E-10 | 4.13E-08 |
| ENSG00000090339 | 1.49  | -2.27 | -1.20 | 8.66  | 2.68E-10 | 4.93E-08 |
| ENSG00000087494 | 0.30  | -3.14 | -5.48 | 3.30  | 2.74E-10 | 4.97E-08 |
| ENSG00000118193 | 0.70  | 4.18  | 5.11  | 4.14  | 3.16E-10 | 5.67E-08 |
| ENSG00000179388 | 1.29  | -7.45 | -6.06 | 7.13  | 3.45E-10 | 6.11E-08 |
| ENSG00000137193 | 1.29  | -2.09 | -1.63 | 4.80  | 3.95E-10 | 6.91E-08 |

|                 |       |       |       |      |          |          |
|-----------------|-------|-------|-------|------|----------|----------|
| ENSG00000163535 | 0.27  | 2.63  | 3.84  | 4.85 | 4.38E-10 | 7.52E-08 |
| ENSG00000075702 | 1.30  | 4.35  | 4.16  | 3.17 | 4.41E-10 | 7.52E-08 |
| ENSG00000151725 | 0.29  | 3.71  | 3.38  | 5.04 | 4.93E-10 | 8.30E-08 |
| ENSG00000163808 | -0.26 | 3.65  | 3.89  | 3.97 | 5.04E-10 | 8.40E-08 |
| ENSG00000137310 | 0.62  | 3.71  | 3.13  | 4.81 | 5.30E-10 | 8.64E-08 |
| ENSG00000065328 | 0.49  | 4.75  | 4.19  | 4.18 | 5.31E-10 | 8.64E-08 |
| ENSG00000186185 | 0.82  | 4.66  | 4.16  | 2.84 | 5.65E-10 | 9.09E-08 |
| ENSG00000122966 | 0.01  | 3.37  | 3.77  | 4.83 | 5.90E-10 | 9.38E-08 |
| ENSG00000161800 | 0.23  | 3.00  | 3.46  | 6.93 | 7.58E-10 | 1.18E-07 |
| ENSG00000087586 | 0.05  | 3.07  | 4.40  | 5.86 | 7.62E-10 | 1.18E-07 |
| ENSG00000162063 | -0.09 | 2.39  | 2.97  | 4.38 | 8.65E-10 | 1.32E-07 |
| ENSG00000182667 | -0.13 | 4.36  | 4.03  | 3.30 | 8.81E-10 | 1.32E-07 |
| ENSG00000171848 | 0.58  | 4.37  | 3.90  | 7.13 | 8.83E-10 | 1.32E-07 |
| ENSG00000166396 | 1.78  | 4.16  | 6.43  | 5.24 | 1.01E-09 | 1.49E-07 |
| ENSG00000136928 | 0.35  | 3.84  | 1.79  | 3.36 | 1.19E-09 | 1.72E-07 |
| ENSG00000178999 | -0.69 | 3.44  | 3.23  | 3.25 | 1.31E-09 | 1.87E-07 |
| ENSG00000126787 | 1.32  | 4.22  | 5.01  | 4.92 | 1.39E-09 | 1.97E-07 |
| ENSG00000075218 | 0.49  | 3.75  | 4.04  | 4.51 | 1.53E-09 | 2.14E-07 |
| ENSG00000100297 | -0.09 | 2.60  | 2.08  | 5.49 | 1.66E-09 | 2.30E-07 |
| ENSG00000138182 | 0.15  | 2.83  | 3.53  | 5.13 | 2.50E-09 | 3.41E-07 |
| ENSG00000094804 | 0.36  | 3.73  | 2.48  | 5.54 | 2.65E-09 | 3.53E-07 |
| ENSG00000113368 | 0.13  | 3.46  | 3.48  | 4.99 | 2.79E-09 | 3.69E-07 |
| ENSG00000170312 | -0.09 | 3.99  | 4.30  | 5.83 | 3.06E-09 | 3.97E-07 |
| ENSG00000184557 | 1.82  | -0.87 | -0.62 | 6.53 | 3.67E-09 | 4.72E-07 |
| ENSG00000134057 | 0.66  | 2.53  | 3.88  | 6.93 | 3.70E-09 | 4.72E-07 |
| ENSG00000104738 | -0.02 | 2.88  | 2.46  | 6.87 | 4.78E-09 | 5.99E-07 |
| ENSG00000166825 | 0.16  | 1.90  | 2.26  | 9.82 | 5.50E-09 | 6.77E-07 |
| ENSG00000187955 | -0.61 | -1.71 | -4.96 | 5.26 | 6.05E-09 | 7.38E-07 |
| ENSG00000119969 | 0.17  | 3.62  | 2.99  | 4.43 | 6.18E-09 | 7.48E-07 |
| ENSG00000198554 | -0.12 | 2.80  | 2.38  | 4.80 | 7.58E-09 | 9.01E-07 |
| ENSG00000056558 | 1.63  | -2.76 | -2.64 | 5.09 | 8.05E-09 | 9.42E-07 |
| ENSG00000185215 | 1.70  | -1.55 | -0.76 | 6.79 | 8.54E-09 | 9.92E-07 |
| ENSG00000260549 | 1.01  | 4.18  | 4.77  | 3.75 | 8.63E-09 | 9.94E-07 |
| ENSG00000166803 | 0.16  | 3.47  | 3.72  | 5.26 | 8.95E-09 | 1.02E-06 |
| ENSG00000166851 | 0.23  | 2.92  | 3.93  | 4.46 | 1.09E-08 | 1.23E-06 |
| ENSG00000163710 | -0.97 | -2.19 | -4.49 | 4.38 | 1.22E-08 | 1.36E-06 |
| ENSG00000163507 | 0.33  | 2.95  | 3.63  | 5.58 | 1.31E-08 | 1.44E-06 |
| ENSG00000105011 | 0.41  | 3.22  | 2.67  | 4.60 | 1.41E-08 | 1.54E-06 |
| ENSG00000137804 | 0.33  | 3.32  | 3.40  | 5.17 | 1.52E-08 | 1.65E-06 |
| ENSG00000124875 | 2.87  | 4.34  | 7.68  | 5.93 | 1.55E-08 | 1.66E-06 |
| ENSG00000144554 | -0.26 | 2.88  | 2.71  | 4.31 | 1.57E-08 | 1.67E-06 |
| ENSG00000085999 | 0.07  | 3.49  | 2.58  | 2.99 | 1.60E-08 | 1.68E-06 |



|                 |       |       |       |      |          |          |
|-----------------|-------|-------|-------|------|----------|----------|
| ENSG00000140525 | 0.02  | 3.13  | 3.13  | 5.74 | 1.70E-08 | 1.77E-06 |
| ENSG00000041982 | 0.99  | 4.02  | 3.66  | 9.33 | 1.72E-08 | 1.78E-06 |
| ENSG00000164611 | 0.00  | 2.28  | 3.42  | 5.80 | 1.80E-08 | 1.83E-06 |
| ENSG00000125740 | 1.12  | -6.58 | -5.90 | 7.48 | 1.87E-08 | 1.89E-06 |
| ENSG00000112312 | 0.18  | 2.89  | 2.87  | 5.27 | 2.25E-08 | 2.24E-06 |
| ENSG00000184661 | 0.98  | 4.37  | 4.56  | 4.66 | 2.56E-08 | 2.48E-06 |
| ENSG00000117650 | 1.02  | 4.19  | 5.34  | 3.96 | 2.56E-08 | 2.48E-06 |
| ENSG00000157456 | 0.32  | 2.54  | 3.65  | 4.70 | 2.58E-08 | 2.48E-06 |
| ENSG00000103489 | 0.96  | 2.97  | 3.00  | 4.70 | 3.29E-08 | 3.14E-06 |
| ENSG00000187741 | -0.37 | 2.61  | 2.16  | 3.90 | 3.45E-08 | 3.28E-06 |
| ENSG00000123485 | -0.04 | 3.68  | 3.36  | 4.41 | 3.83E-08 | 3.60E-06 |
| ENSG00000134222 | -0.49 | 2.04  | 2.62  | 4.10 | 4.00E-08 | 3.71E-06 |
| ENSG00000242265 | 0.30  | 3.02  | 4.24  | 3.97 | 4.03E-08 | 3.71E-06 |
| ENSG00000198355 | 1.28  | -2.29 | -1.39 | 6.04 | 4.18E-08 | 3.74E-06 |
| ENSG00000101412 | -0.25 | 2.76  | 2.08  | 4.34 | 4.19E-08 | 3.74E-06 |
| ENSG00000146918 | 0.23  | 2.81  | 2.91  | 5.32 | 4.21E-08 | 3.74E-06 |
| ENSG00000113810 | 0.29  | 2.03  | 2.69  | 6.52 | 4.58E-08 | 4.03E-06 |
| ENSG00000166508 | -0.12 | 2.12  | 2.01  | 6.90 | 4.90E-08 | 4.27E-06 |
| ENSG00000164283 | 1.64  | 6.40  | 7.66  | 4.91 | 4.94E-08 | 4.27E-06 |
| ENSG00000115163 | -0.38 | 3.06  | 3.71  | 4.14 | 5.10E-08 | 4.36E-06 |
| ENSG00000143333 | 1.02  | -2.95 | -4.51 | 2.70 | 5.11E-08 | 4.36E-06 |
| ENSG00000187479 | 1.79  | -4.03 | -4.59 | 2.82 | 6.10E-08 | 5.17E-06 |
| ENSG00000132510 | 1.26  | -2.92 | -2.40 | 6.12 | 6.26E-08 | 5.27E-06 |
| ENSG00000177084 | 0.02  | 2.23  | 2.19  | 4.88 | 6.47E-08 | 5.42E-06 |
| ENSG00000136982 | 0.99  | 4.46  | 4.19  | 3.81 | 6.70E-08 | 5.58E-06 |
| ENSG00000171320 | -0.07 | 4.76  | 4.58  | 3.83 | 6.92E-08 | 5.73E-06 |
| ENSG00000169908 | 1.18  | 3.57  | 5.06  | 3.25 | 7.48E-08 | 6.16E-06 |
| ENSG00000156970 | 1.76  | 5.01  | 5.31  | 4.26 | 9.19E-08 | 7.52E-06 |
| ENSG00000165244 | -0.04 | 2.80  | 2.23  | 4.59 | 9.81E-08 | 7.99E-06 |
| ENSG00000167306 | -0.97 | -2.67 | -4.75 | 3.55 | 1.20E-07 | 9.64E-06 |
| ENSG00000138160 | 0.05  | 3.23  | 3.66  | 6.05 | 1.32E-07 | 1.04E-05 |
| ENSG00000189057 | -0.19 | 3.88  | 3.37  | 4.08 | 1.36E-07 | 1.07E-05 |
| ENSG00000135451 | -0.09 | 3.31  | 3.97  | 3.03 | 1.54E-07 | 1.21E-05 |
| ENSG00000276043 | 0.07  | 2.69  | 2.23  | 5.56 | 1.73E-07 | 1.34E-05 |
| ENSG00000167670 | 0.01  | 2.41  | 2.16  | 4.55 | 1.85E-07 | 1.42E-05 |
| ENSG00000156802 | 0.33  | 3.25  | 2.89  | 6.19 | 2.01E-07 | 1.53E-05 |
| ENSG00000051341 | 0.53  | 4.21  | 4.11  | 3.68 | 2.05E-07 | 1.56E-05 |
| ENSG00000100906 | 1.67  | -0.87 | -0.23 | 6.96 | 2.09E-07 | 1.58E-05 |
| ENSG00000137831 | 0.00  | 2.30  | 1.72  | 6.81 | 2.49E-07 | 1.83E-05 |
| ENSG00000117632 | -0.01 | 1.81  | 2.57  | 8.36 | 2.64E-07 | 1.94E-05 |
| ENSG00000162772 | 1.58  | -3.01 | -3.59 | 6.06 | 2.79E-07 | 2.04E-05 |
| ENSG00000147883 | 1.36  | -1.47 | -2.87 | 3.72 | 3.59E-07 | 2.56E-05 |

|                 |       |       |       |      |          |            |
|-----------------|-------|-------|-------|------|----------|------------|
| ENSG00000176907 | 1.20  | -1.74 | -2.47 | 7.19 | 3.63E-07 | 2.57E-05   |
| ENSG00000107984 | -0.16 | 2.07  | 1.52  | 9.28 | 3.91E-07 | 2.75E-05   |
| ENSG00000110031 | -0.32 | 1.85  | 3.30  | 4.38 | 4.14E-07 | 2.90E-05   |
| ENSG00000106462 | 0.62  | 3.33  | 2.81  | 4.39 | 4.46E-07 | 3.11E-05   |
| ENSG00000165304 | -0.38 | 2.37  | 2.36  | 5.19 | 5.32E-07 | 3.65E-05   |
| ENSG00000163545 | 1.42  | -1.57 | -1.39 | 5.19 | 5.33E-07 | 3.65E-05   |
| ENSG00000138166 | 1.24  | -1.95 | -2.01 | 7.12 | 5.36E-07 | 3.65E-05   |
| ENSG00000139618 | -0.03 | 3.88  | 3.86  | 3.36 | 5.50E-07 | 3.73E-05   |
| ENSG00000092470 | -0.09 | 3.01  | 2.74  | 4.86 | 6.05E-07 | 4.06E-05   |
| ENSG00000073111 | -0.05 | 2.29  | 1.86  | 5.84 | 6.13E-07 | 4.08E-05   |
| ENSG00000085840 | -0.02 | 4.14  | 3.64  | 3.07 | 6.14E-07 | 4.08E-05   |
| ENSG00000137033 | 0.95  | 4.43  | 2.76  | 4.76 | 6.61E-07 | 4.35E-05   |
| ENSG00000012048 | 0.13  | 2.99  | 2.48  | 4.59 | 6.68E-07 | 4.38E-05   |
| ENSG00000269289 | -0.64 | -6.83 | -3.25 | 2.36 | 6.73E-07 | 4.39E-05   |
| ENSG00000176890 | -0.07 | 2.76  | 2.67  | 4.32 | 6.88E-07 | 4.47E-05   |
| ENSG00000137812 | 0.01  | 4.03  | 4.66  | 4.85 | 6.97E-07 | 4.51E-05   |
| ENSG00000183763 | -0.01 | 3.19  | 2.94  | 2.63 | 7.33E-07 | 4.67E-05   |
| ENSG00000112118 | -0.26 | 2.24  | 1.67  | 6.51 | 7.47E-07 | 4.74E-05   |
| ENSG00000171223 | 1.12  | -3.19 | -2.49 | 7.19 | 9.10E-07 | 5.73E-05   |
| ENSG00000077152 | -0.51 | 2.30  | 2.47  | 4.19 | 9.79E-07 | 6.12E-05   |
| ENSG00000168685 | 1.73  | 3.83  | 4.66  | 6.11 | 1.04E-06 | 6.40E-05   |
| ENSG00000152253 | 0.69  | 3.66  | 3.56  | 3.34 | 1.07E-06 | 6.57E-05   |
| ENSG00000137563 | 0.32  | 1.70  | 3.07  | 4.79 | 1.08E-06 | 6.57E-05   |
| ENSG00000110427 | 0.17  | 3.55  | 3.72  | 4.22 | 1.28E-06 | 7.66E-05   |
| ENSG00000142910 | -1.22 | -2.85 | -4.45 | 6.91 | 1.30E-06 | 7.74E-05   |
| ENSG00000144655 | 1.26  | -2.21 | -1.94 | 6.04 | 1.45E-06 | 8.51E-05   |
| ENSG00000112029 | -0.08 | 3.25  | 2.94  | 4.58 | 1.51E-06 | 8.77E-05   |
| ENSG00000128805 | -0.08 | 1.32  | 2.28  | 4.48 | 1.57E-06 | 9.05E-05   |
| ENSG00000079616 | -0.33 | 1.96  | 2.04  | 4.91 | 1.64E-06 | 9.43E-05   |
| ENSG00000100162 | -0.41 | 3.29  | 3.25  | 3.64 | 2.09E-06 | 0.0001178  |
| ENSG00000163735 | 2.40  | 5.85  | 9.49  | 5.08 | 2.27E-06 | 0.0001269  |
| ENSG00000167513 | 1.52  | 3.71  | 2.81  | 3.37 | 2.29E-06 | 0.00012764 |
| ENSG00000175505 | 1.32  | -1.44 | -2.26 | 5.43 | 2.34E-06 | 0.00012973 |
| ENSG00000121152 | -0.49 | 3.34  | 3.02  | 4.15 | 2.35E-06 | 0.00012973 |
| ENSG00000146232 | 1.13  | -1.58 | -1.06 | 5.31 | 3.15E-06 | 0.00017011 |
| ENSG00000228716 | 0.45  | 2.25  | 2.64  | 5.36 | 3.70E-06 | 0.00019691 |
| ENSG00000130816 | 0.13  | 1.85  | 1.79  | 6.69 | 3.94E-06 | 0.00020825 |
| ENSG00000109674 | 0.38  | 3.66  | 3.88  | 2.97 | 4.21E-06 | 0.00022174 |
| ENSG00000111247 | 0.50  | 3.90  | 3.50  | 4.10 | 4.39E-06 | 0.00023018 |
| ENSG00000120129 | 1.10  | -1.54 | -1.58 | 7.29 | 4.41E-06 | 0.00023036 |
| ENSG00000145358 | -0.60 | 2.26  | 2.59  | 3.43 | 4.53E-06 | 0.00023562 |
| ENSG00000106003 | 0.71  | -4.29 | -5.56 | 3.50 | 4.66E-06 | 0.00024056 |

|                 |       |       |       |      |          |            |
|-----------------|-------|-------|-------|------|----------|------------|
| ENSG00000168389 | 1.63  | -2.35 | -1.35 | 3.57 | 4.68E-06 | 0.00024076 |
| ENSG00000165349 | -0.66 | -2.65 | -4.52 | 3.84 | 4.69E-06 | 0.00024076 |
| ENSG00000125347 | 1.54  | -0.69 | -0.83 | 6.70 | 5.07E-06 | 0.00025822 |
| ENSG00000168496 | -0.02 | 2.10  | 1.92  | 5.00 | 5.38E-06 | 0.00027224 |
| ENSG00000116717 | 1.30  | -1.09 | -1.49 | 7.87 | 5.50E-06 | 0.00027625 |
| ENSG00000165891 | 0.23  | 3.49  | 3.93  | 5.21 | 5.78E-06 | 0.00028932 |
| ENSG00000170961 | 2.39  | 3.39  | 6.89  | 4.87 | 6.14E-06 | 0.00030618 |
| ENSG00000111602 | -0.12 | 1.96  | 1.76  | 5.42 | 6.69E-06 | 0.00032984 |
| ENSG00000006210 | 1.06  | -3.23 | -2.84 | 4.06 | 6.76E-06 | 0.00033224 |
| ENSG00000139734 | 0.10  | 2.06  | 2.40  | 5.41 | 7.12E-06 | 0.00034859 |
| ENSG00000164087 | 0.58  | 2.54  | 2.68  | 4.31 | 7.27E-06 | 0.00035516 |
| ENSG00000149503 | -0.73 | 1.66  | 1.91  | 4.21 | 7.66E-06 | 0.00037261 |
| ENSG00000167325 | 0.03  | 2.32  | 2.37  | 7.03 | 7.75E-06 | 0.0003757  |
| ENSG00000102384 | 0.80  | 3.28  | 3.54  | 4.31 | 7.81E-06 | 0.00037725 |
| ENSG00000221829 | -0.51 | 2.01  | 1.64  | 4.19 | 8.89E-06 | 0.0004238  |
| ENSG00000164104 | -1.11 | 1.50  | 1.59  | 6.42 | 9.41E-06 | 0.000447   |
| ENSG00000105486 | -0.02 | 2.09  | 1.95  | 4.10 | 1.05E-05 | 0.00049536 |
| ENSG00000197467 | 0.33  | 2.56  | 2.25  | 3.51 | 1.12E-05 | 0.00052901 |
| ENSG00000118503 | 2.49  | -0.89 | 0.22  | 5.89 | 1.16E-05 | 0.00054309 |
| ENSG00000164045 | 1.67  | 4.63  | 3.94  | 3.28 | 1.21E-05 | 0.00055907 |
| ENSG00000066279 | 0.02  | 3.73  | 4.53  | 4.89 | 1.21E-05 | 0.00055907 |
| ENSG00000014138 | -0.19 | 2.10  | 1.81  | 4.37 | 1.48E-05 | 0.00066911 |
| ENSG00000136108 | -0.12 | 2.35  | 2.88  | 5.76 | 1.61E-05 | 0.00072663 |
| ENSG00000080839 | 0.05  | 2.60  | 2.52  | 4.01 | 1.64E-05 | 0.00073926 |
| ENSG00000241749 | 0.85  | 3.93  | 4.37  | 2.69 | 1.84E-05 | 0.00082371 |
| ENSG00000162267 | -0.18 | -3.94 | -4.98 | 2.37 | 1.96E-05 | 0.00086906 |
| ENSG00000136492 | 0.38  | 3.02  | 2.87  | 4.01 | 2.07E-05 | 0.00090887 |
| ENSG00000101003 | -0.03 | 2.71  | 2.38  | 4.15 | 2.22E-05 | 0.00095362 |
| ENSG00000142731 | 0.53  | 3.67  | 3.96  | 3.61 | 2.23E-05 | 0.00095647 |
| ENSG00000181938 | -0.35 | 3.06  | 2.86  | 2.82 | 2.25E-05 | 0.00096057 |
| ENSG00000214357 | 0.13  | 2.76  | 2.58  | 3.31 | 2.33E-05 | 0.00098563 |
| ENSG00000010292 | -0.03 | 1.62  | 1.99  | 6.59 | 2.45E-05 | 0.00102813 |
| ENSG00000164619 | 0.94  | 4.34  | 3.77  | 4.29 | 2.76E-05 | 0.00113824 |
| ENSG00000125538 | 1.38  | 1.67  | 4.66  | 3.53 | 2.97E-05 | 0.00121042 |
| ENSG00000136244 | 2.43  | -2.45 | 0.13  | 3.74 | 3.14E-05 | 0.00126962 |
| ENSG00000213853 | 0.15  | 1.34  | 2.16  | 5.34 | 3.28E-05 | 0.00131958 |
| ENSG00000138658 | -0.80 | 2.29  | 1.96  | 3.34 | 3.39E-05 | 0.0013582  |
| ENSG00000091409 | -0.12 | 2.32  | 3.30  | 5.42 | 3.43E-05 | 0.00136756 |
| ENSG00000184992 | -0.19 | 2.28  | 1.67  | 5.01 | 3.43E-05 | 0.00136756 |
| ENSG00000117266 | -0.57 | -4.50 | -1.79 | 2.58 | 3.45E-05 | 0.00137274 |
| ENSG00000104889 | 0.26  | 2.12  | 2.09  | 4.34 | 3.82E-05 | 0.00150689 |
| ENSG00000171033 | 0.73  | 3.21  | 6.54  | 3.10 | 3.83E-05 | 0.00150761 |

|                 |       |       |       |      |            |            |
|-----------------|-------|-------|-------|------|------------|------------|
| ENSG00000095303 | -0.01 | 1.51  | 2.14  | 5.45 | 4.06E-05   | 0.00157851 |
| ENSG00000133110 | 0.90  | 4.32  | 5.10  | 3.11 | 4.07E-05   | 0.00157851 |
| ENSG00000109685 | -0.27 | 1.43  | 1.82  | 6.57 | 4.27E-05   | 0.00165337 |
| ENSG00000166845 | -0.56 | 2.97  | 3.15  | 2.95 | 4.43E-05   | 0.00170466 |
| ENSG00000128342 | 1.32  | -5.64 | -4.48 | 7.77 | 4.58E-05   | 0.00174853 |
| ENSG00000162607 | -0.15 | 2.03  | 1.87  | 6.00 | 4.78E-05   | 0.00182066 |
| ENSG00000278259 | -0.23 | 1.78  | 1.40  | 4.69 | 4.86E-05   | 0.001845   |
| ENSG00000114346 | -0.30 | 2.06  | 2.81  | 5.04 | 5.08E-05   | 0.00192264 |
| ENSG00000109881 | -0.13 | 0.98  | 2.65  | 4.17 | 5.42E-05   | 0.00203556 |
| ENSG00000000460 | -0.74 | 2.45  | 2.27  | 3.62 | 5.66E-05   | 0.00212166 |
| ENSG00000101868 | -0.19 | 1.98  | 1.48  | 4.81 | 5.89E-05   | 0.00219505 |
| ENSG00000176619 | -0.05 | 0.91  | 1.73  | 6.45 | 5.94E-05   | 0.00220746 |
| ENSG00000180875 | -0.33 | 1.72  | 1.27  | 5.05 | 6.33E-05   | 0.00232851 |
| ENSG00000186638 | 0.42  | 3.33  | 2.50  | 2.87 | 6.33E-05   | 0.00232851 |
| ENSG00000144354 | 1.20  | 2.83  | 3.70  | 2.58 | 6.35E-05   | 0.00232851 |
| ENSG00000123473 | 0.57  | 2.80  | 2.79  | 4.29 | 6.51E-05   | 0.00238212 |
| ENSG00000121621 | 1.08  | 3.32  | 4.23  | 3.83 | 7.02E-05   | 0.00252246 |
| ENSG00000121211 | 0.70  | 3.50  | 3.00  | 2.82 | 7.52E-05   | 0.00269654 |
| ENSG00000146263 | 0.09  | 2.71  | 2.21  | 4.21 | 7.54E-05   | 0.00269654 |
| ENSG00000171208 | 0.82  | 3.06  | 3.01  | 3.97 | 7.94E-05   | 0.00283269 |
| ENSG00000125885 | -0.45 | 2.30  | 1.90  | 4.51 | 8.31E-05   | 0.0029218  |
| ENSG00000188486 | 0.30  | 1.98  | 1.79  | 5.59 | 8.34E-05   | 0.0029218  |
| ENSG00000132436 | 0.45  | 2.20  | 2.28  | 4.39 | 8.36E-05   | 0.002924   |
| ENSG00000179750 | 0.33  | 2.80  | 2.94  | 2.65 | 8.40E-05   | 0.00292833 |
| ENSG00000127586 | -0.53 | 2.54  | 2.57  | 2.50 | 8.53E-05   | 0.00295899 |
| ENSG00000133392 | 1.31  | -0.80 | -2.69 | 2.58 | 8.60E-05   | 0.00297585 |
| ENSG00000144810 | 0.61  | 1.79  | 1.93  | 5.57 | 8.72E-05   | 0.00301275 |
| ENSG00000262406 | 1.10  | 2.84  | 2.79  | 4.10 | 9.03E-05   | 0.00309703 |
| ENSG00000185697 | 0.63  | 3.47  | 3.45  | 4.19 | 9.43E-05   | 0.00321848 |
| ENSG00000013573 | -0.24 | 2.45  | 2.13  | 2.69 | 9.76E-05   | 0.00332359 |
| ENSG00000137309 | 0.51  | 1.53  | 2.25  | 8.08 | 0.00010777 | 0.00362463 |
| ENSG00000153044 | 0.02  | 1.77  | 2.61  | 3.89 | 0.00010777 | 0.00362463 |
| ENSG00000075213 | 0.37  | 1.91  | 0.58  | 7.00 | 0.00011153 | 0.00372443 |
| ENSG00000173207 | -0.66 | 1.39  | 1.98  | 4.50 | 0.00011217 | 0.00372816 |
| ENSG00000130695 | -1.34 | 1.72  | 1.43  | 2.93 | 0.00011422 | 0.00378757 |
| ENSG00000176208 | 1.29  | 4.01  | 3.88  | 2.77 | 0.00011585 | 0.00382132 |
| ENSG00000147536 | 0.15  | 2.62  | 2.49  | 4.30 | 0.00011605 | 0.00382132 |
| ENSG00000005513 | 0.21  | -5.82 | -2.86 | 2.47 | 0.00012015 | 0.00394715 |
| ENSG00000132646 | -0.03 | 2.19  | 1.74  | 7.80 | 0.00012483 | 0.00407499 |
| ENSG00000128578 | -1.00 | 2.24  | 2.24  | 2.34 | 0.00012499 | 0.00407499 |
| ENSG00000159259 | -0.03 | 2.61  | 1.83  | 4.03 | 0.0001346  | 0.00435099 |
| ENSG00000213551 | -0.54 | 1.67  | 1.63  | 3.74 | 0.0001389  | 0.00447985 |

|                 |       |       |       |       |            |            |
|-----------------|-------|-------|-------|-------|------------|------------|
| ENSG00000129534 | 0.32  | 2.28  | 2.76  | 4.11  | 0.000158   | 0.00506145 |
| ENSG00000151503 | -0.22 | 1.94  | 1.80  | 4.88  | 0.00015937 | 0.00509364 |
| ENSG00000183814 | -0.47 | 2.39  | 2.93  | 2.52  | 0.00016926 | 0.00537278 |
| ENSG00000172061 | 0.04  | 1.30  | 2.10  | 7.55  | 0.00017142 | 0.0054104  |
| ENSG00000178966 | -0.45 | 2.35  | 2.26  | 3.24  | 0.00017463 | 0.00549449 |
| ENSG00000137807 | 0.44  | 2.28  | 2.42  | 6.82  | 0.00017649 | 0.00553163 |
| ENSG00000136824 | -0.01 | 2.08  | 2.29  | 5.22  | 0.00017659 | 0.00553163 |
| ENSG00000139354 | 0.83  | 3.43  | 4.41  | 3.15  | 0.00018813 | 0.00585447 |
| ENSG00000120539 | 0.47  | 2.29  | 1.94  | 5.16  | 0.00018959 | 0.0058869  |
| ENSG00000051180 | -0.07 | 2.68  | 1.99  | 3.29  | 0.00019222 | 0.00595539 |
| ENSG00000123416 | 0.44  | 2.01  | 1.99  | 7.79  | 0.00019289 | 0.0059631  |
| ENSG00000169213 | 0.41  | 1.85  | 1.53  | 8.35  | 0.00019528 | 0.00599776 |
| ENSG00000058804 | 0.03  | 1.87  | 2.15  | 5.70  | 0.00020396 | 0.00618384 |
| ENSG00000123374 | -0.10 | 1.66  | 1.50  | 5.75  | 0.00020762 | 0.0062681  |
| ENSG00000198056 | 0.56  | 3.48  | 3.31  | 3.00  | 0.00021116 | 0.0063612  |
| ENSG00000111331 | -0.20 | 1.08  | 1.84  | 4.44  | 0.00023091 | 0.00689771 |
| ENSG00000185361 | 0.80  | 0.68  | 2.86  | 2.78  | 0.0002327  | 0.00692548 |
| ENSG00000122861 | 0.92  | 2.38  | 2.71  | 7.54  | 0.0002488  | 0.00733909 |
| ENSG00000131979 | 1.36  | -1.71 | -1.31 | 3.53  | 0.00025136 | 0.00739926 |
| ENSG00000138395 | 0.15  | 2.09  | 2.15  | 3.14  | 0.0002822  | 0.00820469 |
| ENSG00000125148 | 1.19  | 2.84  | 3.25  | 9.23  | 0.00029049 | 0.00839826 |
| ENSG00000144802 | 2.35  | -0.28 | 0.47  | 6.03  | 0.00031992 | 0.00913259 |
| ENSG00000152457 | 0.03  | 1.46  | 2.22  | 3.24  | 0.00032173 | 0.00914622 |
| ENSG00000251562 | 0.54  | -0.66 | 2.93  | 10.88 | 0.00032298 | 0.00914622 |
| ENSG00000031691 | -0.32 | 2.00  | 2.16  | 4.07  | 0.00032608 | 0.00921545 |
| ENSG00000197299 | -0.50 | 3.27  | 3.03  | 2.93  | 0.00032898 | 0.00926043 |
| ENSG00000057019 | -0.08 | 1.90  | 2.12  | 8.40  | 0.00033064 | 0.00928876 |
| ENSG00000062822 | -0.14 | 1.94  | 1.56  | 3.39  | 0.00034053 | 0.00951006 |
| ENSG00000135476 | 0.53  | 2.29  | 2.01  | 4.14  | 0.00036896 | 0.01016365 |
| ENSG00000163814 | 0.26  | 2.79  | 4.19  | 3.81  | 0.00037183 | 0.01021734 |
| ENSG00000101670 | 1.15  | -1.59 | -2.77 | 2.83  | 0.00037411 | 0.01021734 |
| ENSG00000138669 | 0.16  | 2.16  | 1.93  | 3.88  | 0.00037439 | 0.01021734 |
| ENSG00000011201 | -0.64 | 3.95  | 4.88  | 2.43  | 0.00037452 | 0.01021734 |
| ENSG00000006468 | -1.14 | 1.02  | 2.50  | 3.03  | 0.0003775  | 0.01027875 |
| ENSG00000184445 | 0.18  | 2.29  | 2.20  | 5.37  | 0.00038392 | 0.01043365 |
| ENSG00000198576 | 1.64  | -4.85 | -3.67 | 2.90  | 0.00039828 | 0.01080328 |
| ENSG00000119707 | 0.28  | 0.07  | 2.18  | 8.37  | 0.0004261  | 0.01142647 |
| ENSG00000146410 | -0.20 | 2.53  | 2.86  | 2.99  | 0.0004303  | 0.01151722 |
| ENSG00000157601 | -0.47 | -1.71 | 1.61  | 5.51  | 0.00045501 | 0.01213276 |
| ENSG00000077514 | -0.28 | 1.94  | 1.10  | 4.58  | 0.00048338 | 0.01274534 |
| ENSG00000049541 | 0.54  | 2.03  | 1.61  | 4.85  | 0.0004909  | 0.01289    |
| ENSG00000158050 | 2.41  | -2.86 | -2.01 | 2.64  | 0.00049125 | 0.01289    |

|                  |       |       |       |      |            |            |
|------------------|-------|-------|-------|------|------------|------------|
| ENSG00000013297  | 0.15  | 1.26  | 1.73  | 6.66 | 0.00050076 | 0.01307254 |
| ENSG000000178878 | -0.34 | 2.06  | 1.50  | 3.58 | 0.00050379 | 0.01311236 |
| ENSG000000100526 | -0.12 | 2.40  | 3.38  | 2.57 | 0.00051905 | 0.01348469 |
| ENSG000000159388 | 1.01  | -0.94 | -0.93 | 5.31 | 0.00058088 | 0.01479338 |
| ENSG000000166250 | 0.19  | 1.69  | 1.24  | 8.22 | 0.00058091 | 0.01479338 |
| ENSG000000115687 | -0.57 | 2.30  | 1.63  | 2.64 | 0.00058593 | 0.01489444 |
| ENSG000000123136 | 0.46  | 1.27  | 1.78  | 5.48 | 0.00060528 | 0.01533127 |
| ENSG000000121957 | -0.84 | 0.55  | 1.70  | 3.57 | 0.00065267 | 0.01629842 |
| ENSG000000133119 | 0.08  | 2.91  | 2.71  | 4.89 | 0.00066495 | 0.01657563 |
| ENSG00000030419  | -1.59 | 1.18  | 1.54  | 2.93 | 0.00066621 | 0.01657789 |
| ENSG000000166004 | -0.42 | 1.76  | 1.59  | 3.41 | 0.00067209 | 0.01669504 |
| ENSG000000108691 | 2.19  | -2.42 | -0.76 | 7.18 | 0.00070236 | 0.01735547 |
| ENSG000000176974 | -0.45 | 1.19  | 1.61  | 3.87 | 0.00070659 | 0.01742964 |
| ENSG000000149948 | 0.97  | 2.68  | 3.27  | 6.54 | 0.00076471 | 0.01866826 |
| ENSG000000163739 | 4.12  | 0.05  | 4.15  | 5.81 | 0.00076687 | 0.01868873 |
| ENSG000000123496 | 0.92  | 4.12  | 3.29  | 4.19 | 0.00076938 | 0.0187177  |
| ENSG000000168393 | -0.04 | 1.34  | 1.46  | 5.28 | 0.00078158 | 0.01894922 |
| ENSG000000170779 | 0.50  | 2.28  | 2.05  | 3.22 | 0.00079188 | 0.01913358 |
| ENSG000000160957 | -0.44 | 2.00  | 1.31  | 2.91 | 0.00079982 | 0.01925971 |
| ENSG000000072501 | -0.16 | 1.27  | 1.22  | 6.48 | 0.00086195 | 0.02065044 |
| ENSG000000105738 | 0.17  | 1.25  | 1.70  | 4.67 | 0.00091088 | 0.02169565 |
| ENSG000000023171 | 0.36  | 2.31  | 2.23  | 2.81 | 0.00093846 | 0.02229475 |
| ENSG000000079156 | 0.05  | 1.74  | 1.90  | 3.51 | 0.0009721  | 0.02297813 |
| ENSG000000100578 | -0.27 | 1.19  | 1.71  | 4.63 | 0.00098843 | 0.02328646 |
| ENSG000000151014 | 2.03  | -0.03 | -0.27 | 3.32 | 0.00100873 | 0.02363885 |
| ENSG000000122483 | 0.54  | 1.73  | 2.17  | 3.47 | 0.00101006 | 0.02363885 |
| ENSG000000257219 | 1.21  | 2.82  | 2.13  | 2.91 | 0.00101662 | 0.02367498 |
| ENSG000000097021 | 0.54  | 1.73  | 1.58  | 5.06 | 0.00102879 | 0.02391883 |
| ENSG000000103995 | 0.05  | 2.35  | 1.89  | 3.19 | 0.00104914 | 0.02431229 |
| ENSG000000140534 | 0.38  | 2.44  | 1.72  | 3.13 | 0.00106408 | 0.02461819 |
| ENSG000000149554 | -0.21 | 1.56  | 1.66  | 4.89 | 0.00112177 | 0.02574252 |
| ENSG000000100714 | 0.26  | 1.51  | 1.34  | 6.65 | 0.00116896 | 0.0266098  |
| ENSG000000156113 | 0.32  | 1.82  | 0.73  | 5.52 | 0.00117238 | 0.02664478 |
| ENSG000000069399 | 1.07  | -1.57 | -0.63 | 5.31 | 0.00121622 | 0.02732448 |
| ENSG000000005189 | -0.26 | 1.84  | 1.82  | 3.22 | 0.0012188  | 0.02732448 |
| ENSG000000157193 | 0.29  | 1.84  | 1.73  | 3.60 | 0.00124484 | 0.02780068 |
| ENSG000000181751 | 0.15  | 1.78  | 1.72  | 6.26 | 0.00133375 | 0.02950718 |
| ENSG000000117155 | 0.05  | 1.91  | 1.97  | 5.79 | 0.00135171 | 0.02985776 |
| ENSG000000118655 | 0.14  | 2.30  | 1.83  | 3.24 | 0.00136987 | 0.0301649  |
| ENSG000000143493 | -0.01 | 1.74  | 1.50  | 4.43 | 0.00142923 | 0.0313744  |
| ENSG000000101911 | 0.06  | 1.90  | 1.50  | 4.75 | 0.00152164 | 0.03299377 |
| ENSG000000095002 | 0.28  | 1.85  | 1.48  | 5.84 | 0.0015538  | 0.03350728 |

|                 |       |       |       |      |            |            |
|-----------------|-------|-------|-------|------|------------|------------|
| ENSG00000138376 | 0.40  | 2.59  | 2.69  | 3.95 | 0.00155479 | 0.03350728 |
| ENSG00000205208 | -0.77 | 1.35  | 1.34  | 4.62 | 0.00156651 | 0.03360631 |
| ENSG00000187173 | 0.25  | 2.04  | 0.77  | 3.54 | 0.00161291 | 0.03434168 |
| ENSG00000120802 | 0.09  | 1.82  | 2.28  | 6.45 | 0.0016249  | 0.03444158 |
| ENSG00000182481 | -0.05 | 1.26  | 1.65  | 8.05 | 0.00163251 | 0.03445568 |
| ENSG00000148848 | 0.59  | 1.59  | 1.54  | 7.10 | 0.00163336 | 0.03445568 |
| ENSG00000145147 | 0.39  | 2.07  | 2.20  | 6.44 | 0.0016555  | 0.03472635 |
| ENSG00000187257 | -0.10 | 0.27  | 1.68  | 3.98 | 0.00165859 | 0.03473951 |
| ENSG00000120549 | 0.09  | 1.94  | 2.54  | 2.47 | 0.00178047 | 0.03707305 |
| ENSG00000138092 | 0.34  | 2.12  | 1.70  | 4.42 | 0.00180923 | 0.03756136 |
| ENSG00000050438 | -0.12 | 1.49  | 2.19  | 3.07 | 0.00182254 | 0.03772718 |
| ENSG00000164171 | 0.60  | 2.78  | 2.60  | 6.53 | 0.00188488 | 0.03867823 |
| ENSG00000095752 | 1.30  | -2.81 | -2.40 | 3.93 | 0.00191864 | 0.03925735 |
| ENSG00000172167 | -0.54 | 2.43  | 2.57  | 2.64 | 0.00194844 | 0.03975208 |
| ENSG00000124207 | 0.06  | 1.83  | 1.90  | 7.17 | 0.00202822 | 0.04108375 |
| ENSG00000177606 | 1.01  | -0.56 | -0.58 | 7.55 | 0.00215848 | 0.04316652 |
| ENSG00000145779 | 1.43  | -0.15 | -0.02 | 5.17 | 0.00221988 | 0.04414513 |
| ENSG00000143401 | 0.05  | 0.98  | 1.62  | 5.86 | 0.00230601 | 0.04562559 |
| ENSG00000175166 | 0.18  | 1.22  | 1.28  | 9.12 | 0.00232428 | 0.04583077 |
| ENSG00000041353 | 0.38  | 2.34  | 2.66  | 2.60 | 0.0023753  | 0.04658158 |
| ENSG00000171914 | -0.17 | 1.30  | 0.95  | 6.09 | 0.00239954 | 0.04699186 |
| ENSG00000099250 | -0.13 | 1.32  | 1.21  | 8.04 | 0.00246951 | 0.04783278 |
| ENSG00000164985 | -0.09 | 0.95  | 1.38  | 5.56 | 0.00253896 | 0.04891039 |
| ENSG00000163781 | -0.01 | 1.51  | 1.39  | 5.51 | 0.00254399 | 0.04894069 |
| ENSG00000117748 | 0.21  | 1.86  | 1.16  | 4.79 | 0.00257758 | 0.04938557 |

**cells infected with T. gondii EGS strain for 2, 18 and 48**

| Product Name                                             |
|----------------------------------------------------------|
| ATP-binding cassette, sub-family B (MDR/TAP), member 5   |
| alcohol dehydrogenase 1B (class I), beta polypeptide     |
| cytoskeleton associated protein 2-like                   |
| baculoviral IAP repeat containing 5                      |
| topoisomerase (DNA) II alpha 170kDa                      |
| v-myb avian myeloblastosis viral oncogene homolog-like 2 |
| marker of proliferation Ki-67                            |
| CD14 molecule                                            |
| myopalladin                                              |
| centrosomal protein 55kDa                                |
| endothelin 1                                             |
| spindle and kinetochore associated complex subunit 1     |
| proline rich 11                                          |
| nuclear receptor subfamily 4, group A, member 1          |
| cyclin A2                                                |
| hyaluronan-mediated motility receptor (RHAMM)            |
| claspin                                                  |
| cell division cycle 45                                   |
| kinesin family member 2C                                 |
| BUB1 mitotic checkpoint serine/threonine kinase          |
| forkhead box M1                                          |
| non-SMC condensin I complex, subunit G                   |
| TPX2, microtubule-associated                             |
| centromere protein F, 350/400kDa                         |
| family with sequence similarity 83, member D             |
| PDZ binding kinase                                       |
| SPC24, NDC80 kinetochore complex component               |
| kinesin family member C1                                 |
| cell division cycle associated 3                         |
| centromere protein E, 312kDa                             |
| matrix metalloproteinase 1                               |
| cell division cycle associated 5                         |



|                                                               |
|---------------------------------------------------------------|
| protein regulator of cytokinesis 1                            |
| excision repair cross-complementation group 6-like            |
| kinesin family member 4A                                      |
| TTK protein kinase                                            |
| spindle and kinetochore associated complex subunit 3          |
| MAD2 mitotic arrest deficient-like 1 (yeast)                  |
| sperm associated antigen 5                                    |
| nuclear receptor subfamily 4, group A, member 3               |
| denticleless E3 ubiquitin protein ligase homolog (Drosophila) |
| mitogen-activated protein kinase kinase kinase 8              |
| Rho GTPase activating protein 11A                             |
| transforming, acidic coiled-coil containing protein 3         |
| NIPA-like domain containing 4                                 |
| immediate early response 3                                    |
| DEP domain containing 1                                       |
| kinesin family member 20A                                     |
| Ras-related associated with diabetes                          |
| cell division cycle 25C                                       |
| colony stimulating factor 3 (granulocyte)                     |
| SHC SH2-domain binding protein 1                              |
| ZW10 interacting kinetochore protein                          |
| zinc finger CCCH-type containing 12A                          |
| GINS complex subunit 2 (Psf2 homolog)                         |
| thymidine kinase 1, soluble                                   |
| NUF2, NDC80 kinetochore complex component                     |
| matrix metalloproteinase 3                                    |
| indolethylamine N-methyltransferase                           |
| cell division cycle 20                                        |
| ubiquitin-conjugating enzyme E2C                              |
| cell division cycle associated 8                              |
| adenylate kinase 5                                            |
| early growth response 2                                       |
| IQ motif containing GTPase activating protein 3               |
| geminin coiled-coil domain containing                         |
| anillin, actin binding protein                                |
| thyroid hormone receptor interactor 13                        |
| NDC80 kinetochore complex component                           |
| intercellular adhesion molecule 1                             |
| parathyroid hormone-like hormone                              |
| kinesin family member 14                                      |
| early growth response 3                                       |
| Pim-1 proto-oncogene, serine/threonine kinase                 |

|                                                                 |
|-----------------------------------------------------------------|
| shugoshin-like 2 ( <i>S. pombe</i> )                            |
| WD repeat domain 62                                             |
| centromere protein U                                            |
| kinesin family member 15                                        |
| transcription factor 19                                         |
| minichromosome maintenance complex component 10                 |
| kinesin family member 18B                                       |
| citron rho-interacting serine/threonine kinase                  |
| Rac GTPase activating protein 1                                 |
| aurora kinase A                                                 |
| cyclin F                                                        |
| neurotrimin                                                     |
| ribonucleotide reductase M2                                     |
| serpin peptidase inhibitor, clade B (ovalbumin), member 7       |
| gamma-aminobutyric acid (GABA) B receptor, 2                    |
| aurora kinase B                                                 |
| discs, large ( <i>Drosophila</i> ) homolog-associated protein 5 |
| G-2 and S-phase expressed 1                                     |
| minichromosome maintenance complex component 5                  |
| kinesin family member 20B                                       |
| cell division cycle 6                                           |
| lamin B1                                                        |
| cyclin-dependent kinase 1                                       |
| suppressor of cytokine signaling 3                              |
| cyclin B1                                                       |
| minichromosome maintenance complex component 4                  |
| alanyl (membrane) aminopeptidase                                |
| collagen, type XIV, alpha 1                                     |
| helicase, lymphoid-specific                                     |
| WD repeat and HMG-box DNA binding protein 1                     |
| TNF receptor-associated factor 1                                |
| tumor necrosis factor, alpha-induced protein 2                  |
| metallothionein 1L (gene/pseudogene)                            |
| KIAA0101                                                        |
| polo-like kinase 1                                              |
| procollagen C-endopeptidase enhancer 2                          |
| KIAA1524                                                        |
| anti-silencing function 1B histone chaperone                    |
| nucleolar and spindle associated protein 1                      |
| chemokine (C-X-C motif) ligand 6                                |
| Fanconi anemia, complementation group D2                        |
| RAD54-like ( <i>S. cerevisiae</i> )                             |

|                                                                |
|----------------------------------------------------------------|
| Fanconi anemia, complementation group I                        |
| tenascin C                                                     |
| pituitary tumor-transforming 1                                 |
| FBJ murine osteosarcoma viral oncogene homolog B               |
| geminin, DNA replication inhibitor                             |
| cell division cycle associated 2                               |
| NIMA-related kinase 2                                          |
| cyclin B2                                                      |
| xylosyltransferase I                                           |
| Fanconi anemia, complementation group A                        |
| Holliday junction recognition protein                          |
| proline/serine-rich coiled-coil 1                              |
| paternally expressed 10                                        |
| Pim-3 proto-oncogene, serine/threonine kinase                  |
| E2F transcription factor 1                                     |
| non-SMC condensin II complex, subunit G2                       |
| structural maintenance of chromosomes 4                        |
| minichromosome maintenance complex component 7                 |
| endothelial cell-specific molecule 1                           |
| centromere protein A                                           |
| regulator of G-protein signaling 16                            |
| chromosome 11 open reading frame 96                            |
| lysine (K)-specific demethylase 6B                             |
| polymerase (DNA directed), epsilon, catalytic subunit          |
| DNA replication and sister chromatid cohesion 1                |
| establishment of sister chromatid cohesion N-acetyltransferase |
| transmembrane 4 L six family member 1                          |
| BUB1 mitotic checkpoint serine/threonine kinase B              |
| zinc finger protein 367                                        |
| myosin VB                                                      |
| kinesin family member 11                                       |
| family with sequence similarity 111, member B                  |
| trophinin associated protein                                   |
| ubiquitin-like with PHD and ring finger domains 1              |
| chromatin assembly factor 1, subunit A (p150)                  |
| ATPase family, AAA domain containing 2                         |
| polymerase (DNA directed), theta                               |
| nuclear factor of kappa light polypeptide gene enhancer in B-c |
| uveal autoantigen with coiled-coil domains and ankyrin repeats |
| stathmin 1                                                     |
| activating transcription factor 3                              |
| cyclin-dependent kinase inhibitor 2B (p15, inhibits CDK4)      |

|                                                                |
|----------------------------------------------------------------|
| chromosome 8 open reading frame 4                              |
| dickkopf WNT signaling pathway inhibitor 1                     |
| leupaxin                                                       |
| enhancer of zeste 2 polycomb repressive complex 2 subunit      |
| maternal embryonic leucine zipper kinase                       |
| NUAK family, SNF1-like kinase, 2                               |
| dual specificity phosphatase 5                                 |
| breast cancer 2, early onset                                   |
| WD repeat domain 76                                            |
| minichromosome maintenance complex component 2                 |
| origin recognition complex, subunit 1                          |
| interleukin 33                                                 |
| breast cancer 1, early onset                                   |
| CTB-92J24.3                                                    |
| thymidylate synthetase                                         |
| cancer susceptibility candidate 5                              |
| TRAF interacting protein                                       |
| minichromosome maintenance complex component 3                 |
| jun B proto-oncogene                                           |
| ubiquitin-conjugating enzyme E2T                               |
| interleukin 7 receptor                                         |
| SPC25, NDC80 kinetochore complex component                     |
| gamma-glutamyl hydrolase (conjugase, foyllypolygammaglutam     |
| KIAA1549-like                                                  |
| tubulointerstitial nephritis antigen-like 1                    |
| cysteine-serine-rich nuclear protein 1                         |
| F-box protein 5                                                |
| Rho GTPase activating protein 22                               |
| kinesin family member 22                                       |
| centromere protein M                                           |
| chemokine (C-X-C motif) ligand 5                               |
| chromatin licensing and DNA replication factor 1               |
| cardiotrophin-like cytokine factor 1                           |
| non-SMC condensin I complex, subunit H                         |
| nuclear factor of kappa light polypeptide gene enhancer in B-c |
| dihydrofolate reductase                                        |
| DNA (cytosine-5-)-methyltransferase 1                          |
| nei endonuclease VIII-like 3 (E. coli)                         |
| RAD51 associated protein 1                                     |
| dual specificity phosphatase 1                                 |
| DNA-damage-inducible transcript 4-like                         |
| LFNG O-fucosylpeptide 3-beta-N-acetylglucosaminyltransferas    |

|                                                                      |
|----------------------------------------------------------------------|
| major facilitator superfamily domain containing 2A                   |
| solute carrier family 7 (cationic amino acid transporter, y+ system) |
| interferon regulatory factor 1                                       |
| flap structure-specific endonuclease 1                               |
| growth arrest and DNA-damage-inducible, alpha                        |
| E2F transcription factor 7                                           |
| hyaluronan synthase 2                                                |
| timeless circadian clock                                             |
| chemokine (C-X3-C motif) ligand 1                                    |
| diaphanous-related formin 3                                          |
| POC1 centriolar protein A                                            |
| inner centromere protein antigens 135/155kDa                         |
| ribonucleotide reductase M1                                          |
| centromere protein I                                                 |
| Fanconi anemia, complementation group G                              |
| high mobility group box 2                                            |
| ligase I, DNA, ATP-dependent                                         |
| collagen, type XIII, alpha 1                                         |
| tumor necrosis factor, alpha-induced protein 3                       |
| cell division cycle 25A                                              |
| asp (abnormal spindle) homolog, microcephaly associated (Drosophila) |
| polymerase (DNA directed), alpha 2, accessory subunit                |
| cytoskeleton associated protein 2                                    |
| retinoblastoma-like 1                                                |
| ribosomal protein SA pseudogene 52                                   |
| inter-alpha-trypsin inhibitor heavy chain 3                          |
| BRCA1 interacting protein C-terminal helicase 1                      |
| GIN5 complex subunit 1 (Psf1 homolog)                                |
| polo-like kinase 4                                                   |
| GIN5 complex subunit 3 (Psf3 homolog)                                |
| neuralized E3 ubiquitin protein ligase 1B                            |
| non-SMC condensin I complex, subunit D2                              |
| BMP binding endothelial regulator                                    |
| interleukin 1, beta                                                  |
| interleukin 6                                                        |
| epithelial membrane protein 2                                        |
| zinc finger, GRF-type containing 1                                   |
| integrin, alpha 6                                                    |
| BRI3 binding protein                                                 |
| cyclin-dependent kinase 18                                           |
| ribonuclease H2, subunit A                                           |
| protein kinase (cAMP-dependent, catalytic) inhibitor alpha           |

|                                                                                       |
|---------------------------------------------------------------------------------------|
| prostaglandin-endoperoxide synthase 1 (prostaglandin G/H synthase and cyclooxygenase) |
| periostin, osteoblast specific factor                                                 |
| Wolf-Hirschhorn syndrome candidate 1                                                  |
| chromosome 18 open reading frame 54                                                   |
| leukemia inhibitory factor                                                            |
| ubiquitin specific peptidase 1                                                        |
| myosin XIX                                                                            |
| epithelial cell transforming 2                                                        |
| coiled-coil domain containing 34                                                      |
| chromosome 1 open reading frame 112                                                   |
| polymerase (DNA directed), alpha 1, catalytic subunit                                 |
| lamin B2                                                                              |
| gremlin 2, DAN family BMP antagonist                                                  |
| kinesin family member 24                                                              |
| cell division cycle associated 7                                                      |
| SCL/TAL1 interrupting locus                                                           |
| kinesin family member 18A                                                             |
| meiotic nuclear divisions 1 homolog (S. cerevisiae)                                   |
| MMS22-like, DNA repair protein                                                        |
| neuropilin (NRP) and tolloid (TLL)-like 2                                             |
| minichromosome maintenance complex component 8                                        |
| H2A histone family, member X                                                          |
| fidgetin-like 1                                                                       |
| apolipoprotein B mRNA editing enzyme, catalytic polypeptide-like 1                    |
| CTF18, chromosome transmission fidelity factor 18 homolog (S. cerevisiae)             |
| myosin, heavy chain 11, smooth muscle                                                 |
| collagen, type VIII, alpha 1                                                          |
| matrix metalloproteinase 12                                                           |
| v-myb avian myeloblastosis viral oncogene homolog-like 1                              |
| DEAD/H (Asp-Glu-Ala-Asp/His) box helicase 11                                          |
| high mobility group AT-hook 1                                                         |
| centromere protein H                                                                  |
| sema domain, immunoglobulin domain (Ig), short basic domain containing                |
| CDC28 protein kinase regulatory subunit 1B                                            |
| centrosomal protein 85kDa                                                             |
| ATPase family, AAA domain containing 5                                                |
| GINS complex subunit 4 (Sld5 homolog)                                                 |
| SRY (sex determining region Y)-box 8                                                  |
| proliferating cell nuclear antigen                                                    |
| striatin interacting protein 2                                                        |
| chromatin assembly factor 1, subunit B (p60)                                          |
| DnaJ (Hsp40) homolog, subfamily C, member 9                                           |

|                                                                |
|----------------------------------------------------------------|
| MIS18 binding protein 1                                        |
| non-SMC condensin II complex, subunit D3                       |
| lin-9 DREAM MuvB core complex component                        |
| leucine rich repeat containing 15                              |
| RecQ mediated genome instability 1                             |
| kinesin family member 23                                       |
| structural maintenance of chromosomes 2                        |
| growth arrest-specific 2 like 3                                |
| microtubule associated serine/threonine kinase-like            |
| RAD51 recombinase                                              |
| tubulin, alpha 1b                                              |
| RAB3B, member RAS oncogene family                              |
| NDC1 transmembrane nucleoporin                                 |
| cyclin-dependent kinase 2                                      |
| primase, DNA, polypeptide 1 (49kDa)                            |
| 2'-5'-oligoadenylate synthetase 3, 100kDa                      |
| tumor necrosis factor, alpha-induced protein 8-like 1          |
| plasminogen activator, urokinase                               |
| GTP cyclohydrolase 1                                           |
| cyclin-dependent kinase 15                                     |
| metallothionein 2A                                             |
| nuclear factor of kappa light polypeptide gene enhancer in B-c |
| DNA cross-link repair 1C                                       |
| metastasis associated lung adenocarcinoma transcript 1 (non-   |
| centromere protein Q                                           |
| Bloom syndrome, RecQ helicase-like                             |
| discoidin, CUB and LCCL domain containing 2                    |
| polymerase (DNA directed), delta 1, catalytic subunit          |
| extra spindle pole bodies homolog 1 (S. cerevisiae)            |
| CUB domain containing protein 1                                |
| lipase, endothelial                                            |
| protein kinase, cGMP-dependent, type II                        |
| anosmin 1                                                      |
| ets variant 1                                                  |
| kinetochore associated 1                                       |
| activity-regulated cytoskeleton-associated protein             |
| RNA binding motif protein 25                                   |
| mitochondrial fission regulator 2                              |
| MX dynamin-like GTPase 1                                       |
| polymerase (DNA-directed), delta 3, accessory subunit          |
| replication factor C (activator 1) 2, 40kDa                    |
| dual specificity phosphatase 2                                 |

|                                                                   |
|-------------------------------------------------------------------|
| claudin 11                                                        |
| apolipoprotein L domain containing 1                              |
| cyclin-dependent kinase inhibitor 3                               |
| BTG family, member 2                                              |
| CXADR-like membrane protein                                       |
| PAS domain containing serine/threonine kinase                     |
| DEAD (Asp-Glu-Ala-Asp) box polypeptide 39A                        |
| G-protein signaling modulator 2                                   |
| replication factor C (activator 1) 3, 38kDa                       |
| IKAROS family zinc finger 2 (Helios)                              |
| centrosomal protein 295kDa                                        |
| chemokine (C-C motif) ligand 2                                    |
| serine hydroxymethyltransferase 1 (soluble)                       |
| high mobility group AT-hook 2                                     |
| chemokine (C-X-C motif) ligand 1 (melanoma growth stimulatir      |
| interleukin 13 receptor, alpha 2                                  |
| deoxythymidylate kinase (thymidylate kinase)                      |
| cell division cycle associated 4                                  |
| RecQ protein-like 4                                               |
| structural maintenance of chromosomes 1A                          |
| signal-induced proliferation-associated 1 like 3                  |
| GRAM domain containing 1B                                         |
| oxysterol binding protein-like 6                                  |
| KIAA0586                                                          |
| CCR4 carbon catabolite repression 4-like ( <i>S. cerevisiae</i> ) |
| coiled-coil domain containing 18                                  |
| RP11-54A9.1                                                       |
| acyl-CoA thioesterase 7                                           |
| centrosomal protein 152kDa                                        |
| TOPBP1-interacting checkpoint and replication regulator           |
| checkpoint kinase 1                                               |
| methylenetetrahydrofolate dehydrogenase (NADP+ dependent          |
| potassium channel, calcium activated large conductance subfa      |
| B-cell CLL/lymphoma 3                                             |
| Putative RNA exonuclease NEF-sp                                   |
| low density lipoprotein receptor-related protein 8, apolipoprotei |
| chromosome 5 open reading frame 30                                |
| synovial sarcoma, X breakpoint 2 interacting protein              |
| DNA cross-link repair 1B                                          |
| integrator complex subunit 7                                      |
| phosphoribosyl pyrophosphate synthetase 2                         |
| mutS homolog 2                                                    |



|                                                                |
|----------------------------------------------------------------|
| BRCA1 associated RING domain 1                                 |
| chromosome 4 open reading frame 46                             |
| late cornified envelope 2A                                     |
| thymopoietin                                                   |
| karyopherin alpha 2 (RAG cohort 1, importin alpha 1)           |
| ADAM metallopeptidase domain 12                                |
| slit homolog 2 (Drosophila)                                    |
| round spermatid basic protein 1-like                           |
| KIAA1217                                                       |
| centromere protein O                                           |
| solute carrier family 4, sodium bicarbonate cotransporter, mem |
| integrin, alpha 2 (CD49B, alpha 2 subunit of VLA-2 receptor)   |
| interleukin 11                                                 |
| MDM2 binding protein                                           |
| CSE1 chromosome segregation 1-like (yeast)                     |
| jun proto-oncogene                                             |
| tumor necrosis factor, alpha-induced protein 8                 |
| acidic (leucine-rich) nuclear phosphoprotein 32 family, membe  |
| proteasome (prosome, macropain) 26S subunit, non-ATPase,       |
| RAB27B, member RAS oncogene family                             |
| talin 2                                                        |
| neuropilin 1                                                   |
| PC4 and SFRS1 interacting protein 1                            |
| topoisomerase (DNA) II binding protein 1                       |
| replication protein A2, 32kDa                                  |

**Supplementary Table S3A: Differential *T. gondii* gene expression analysis of human HFF cells infected with *T. gondii* EGS strain for 2 hours compared to the average *T. gondii* gene expression of human MM6 and neuronal stem cells infected with either GT1, ME49 or VEG strains of *T. gondii* for 18 hours.**

| gene ID       | logFC | logCPM | PValue    | FDR       | Product name                                                                              |
|---------------|-------|--------|-----------|-----------|-------------------------------------------------------------------------------------------|
| TGME49_462910 | 13.60 | 7.86   | 4.06E-197 | 3.14E-193 | large subunit ribosomal RNA                                                               |
| TGME49_457990 | 15.26 | 11.10  | 1.06E-128 | 4.09E-125 | 28S ribosomal RNA                                                                         |
| TGME49_200010 | 11.50 | 6.04   | 5.76E-92  | 1.49E-88  | hypothetical protein                                                                      |
| TGME49_208370 | 3.55  | 9.24   | 1.07E-58  | 2.07E-55  | myosin heavy chain, putative                                                              |
| TGME49_280570 | 4.82  | 8.90   | 4.21E-58  | 6.50E-55  | SAG-related sequence SRS35A                                                               |
| TGME49_251180 | 3.93  | 6.82   | 2.38E-48  | 3.07E-45  | KRUF family protein                                                                       |
| TGME49_275860 | 3.00  | 9.69   | 2.06E-47  | 2.27E-44  | hypothetical protein                                                                      |
| TGME49_252430 | 2.95  | 8.32   | 2.45E-44  | 2.37E-41  | hypothetical protein                                                                      |
| TGME49_290700 | 2.81  | 8.51   | 1.41E-40  | 1.21E-37  | hypothetical protein                                                                      |
| TGME49_205250 | 3.16  | 9.76   | 1.25E-39  | 9.69E-37  | rhoptry protein ROP18                                                                     |
| TGME49_321480 | 6.55  | 5.82   | 2.31E-38  | 1.63E-35  | SAG-related sequence SRS12B                                                               |
| TGME49_316250 | 3.42  | 9.32   | 2.77E-37  | 1.79E-34  | hypothetical protein                                                                      |
| TGME49_206550 | 4.76  | 6.24   | 5.30E-37  | 3.15E-34  | hypothetical protein                                                                      |
| TGME49_293790 | 4.78  | 6.58   | 6.49E-36  | 3.59E-33  | hypothetical protein                                                                      |
| TGME49_204050 | 3.32  | 11.00  | 3.38E-34  | 1.74E-31  | subtilisin SUB1                                                                           |
| TGME49_226380 | 2.73  | 8.78   | 1.34E-32  | 6.09E-30  | hypothetical protein                                                                      |
| TGME49_214980 | 2.49  | 8.60   | 1.34E-32  | 6.09E-30  | hypothetical protein                                                                      |
| TGME49_275460 | 3.28  | 7.38   | 1.90E-31  | 8.17E-29  | hypothetical protein                                                                      |
| TGME49_212300 | 2.42  | 8.95   | 4.41E-31  | 1.79E-28  | hypothetical protein                                                                      |
| TGME49_311100 | 2.17  | 9.34   | 1.02E-30  | 3.95E-28  | zinc finger (CCCH type) motif-containing protein                                          |
| TGME49_214080 | 3.25  | 9.15   | 6.28E-29  | 2.31E-26  | toxofilin                                                                                 |
| TGME49_289920 | 2.39  | 8.81   | 1.34E-28  | 4.72E-26  | hypothetical protein                                                                      |
| TGME49_312420 | 2.29  | 8.62   | 1.65E-28  | 5.54E-26  | hypothetical protein                                                                      |
| TGME49_270700 | 2.58  | 7.38   | 3.21E-28  | 1.03E-25  | hypothetical protein                                                                      |
| TGME49_215960 | 2.54  | 9.11   | 7.59E-28  | 2.35E-25  | hypothetical protein                                                                      |
| TGME49_249990 | 2.71  | 10.11  | 1.62E-27  | 4.81E-25  | hypothetical protein                                                                      |
| TGME49_205680 | 2.76  | 8.25   | 2.41E-27  | 6.91E-25  | hypothetical protein                                                                      |
| TGME49_288475 | 7.24  | 6.01   | 2.97E-27  | 8.20E-25  | hypothetical protein                                                                      |
| TGME49_287040 | 2.75  | 7.28   | 4.41E-27  | 1.18E-24  | hypothetical protein                                                                      |
| TGME49_301250 | 3.63  | 14.08  | 1.40E-26  | 3.60E-24  | hypothetical protein                                                                      |
| TGME49_240060 | 2.32  | 9.26   | 1.51E-26  | 3.76E-24  | hypothetical protein                                                                      |
| TGME49_208450 | 2.27  | 8.91   | 6.15E-26  | 1.46E-23  | protease inhibitor PI2                                                                    |
| TGME49_233450 | 3.57  | 8.80   | 6.22E-26  | 1.46E-23  | SAG-related sequence SRS29A                                                               |
| TGME49_213280 | 2.23  | 9.31   | 7.55E-26  | 1.72E-23  | SAG-related sequence SRS25                                                                |
| TGME49_230830 | 3.75  | 6.09   | 9.18E-26  | 2.03E-23  | ATPase family associated with various cellular activities (AAA) domain-containing protein |
| TGME49_308020 | 2.11  | 8.94   | 2.67E-25  | 5.73E-23  | SAG-related sequence SRS57                                                                |
| TGME49_207400 | 2.61  | 8.87   | 4.74E-25  | 9.91E-23  | hypothetical protein                                                                      |
| TGME49_220380 | 2.75  | 6.97   | 9.11E-25  | 1.85E-22  | hypothetical protein                                                                      |
| TGME49_272370 | 3.11  | 8.31   | 2.56E-24  | 5.08E-22  | hypothetical protein                                                                      |
| TGME49_320490 | 2.28  | 8.94   | 3.71E-24  | 7.16E-22  | N-acyl-phosphatidylethanolamine-hydrolyzing phospholipase D family protein                |
| TGME49_207210 | 3.66  | 7.68   | 3.80E-24  | 7.16E-22  | hypothetical protein                                                                      |

|               |        |       |          |          |                                                                  |
|---------------|--------|-------|----------|----------|------------------------------------------------------------------|
| TGME49_249030 | 2.30   | 7.90  | 4.93E-24 | 9.08E-22 | endonuclease/exonuclease/phosphatase family protein              |
| TGME49_275870 | 3.61   | 6.07  | 6.84E-24 | 1.23E-21 | tubulin/FtsZ family, GTPase domain-containing protein            |
| TGME49_289050 | 2.92   | 8.45  | 1.38E-23 | 2.42E-21 | FIKK kinase, putative                                            |
| TGME49_214410 | 2.75   | 7.87  | 1.55E-23 | 2.66E-21 | hypothetical protein                                             |
| TGME49_289600 | 2.17   | 8.64  | 2.63E-23 | 4.41E-21 | heat shock protein HSP29                                         |
| TGME49_237230 | 1.97   | 9.94  | 3.84E-23 | 6.31E-21 | hypothetical protein                                             |
| TGME49_313440 | 3.95   | 8.63  | 4.20E-23 | 6.77E-21 | hypothetical protein                                             |
| TGME49_226540 | 3.06   | 7.21  | 4.37E-23 | 6.89E-21 | protein kinase                                                   |
| TGME49_289630 | 2.58   | 7.72  | 5.63E-23 | 8.71E-21 | microneme protein MIC16                                          |
| TGME49_206510 | 2.16   | 9.01  | 8.29E-23 | 1.26E-20 | toxolysin TLN4                                                   |
| TGME49_260310 | 3.51   | 6.15  | 1.26E-22 | 1.87E-20 | ATP-binding cassette transporter ABC.B1                          |
| TGME49_294200 | 2.28   | 10.19 | 5.00E-22 | 7.30E-20 | glucose-6-phosphate 1-dehydrogenase                              |
| TGME49_216820 | 2.24   | 8.73  | 6.17E-22 | 8.84E-20 | transporter, major facilitator family protein                    |
| TGME49_321530 | 1.96   | 8.88  | 7.13E-22 | 1.00E-19 | cathepsin CPL                                                    |
| TGME49_252390 | 2.25   | 8.81  | 2.02E-21 | 2.79E-19 | hypothetical protein                                             |
| TGME49_254460 | 2.40   | 7.76  | 3.88E-21 | 5.26E-19 | hypothetical protein                                             |
| TGME49_220950 | 2.53   | 10.12 | 5.99E-21 | 7.84E-19 | hypothetical protein                                             |
| TGME49_217680 | 1.82   | 9.52  | 1.67E-20 | 2.15E-18 | hypothetical protein                                             |
| TGME49_201785 | 2.09   | 9.22  | 2.15E-20 | 2.73E-18 | hypothetical protein                                             |
| TGME49_214575 | 3.21   | 6.21  | 2.91E-20 | 3.63E-18 | hypothetical protein                                             |
| TGME49_283540 | 2.04   | 8.69  | 8.08E-20 | 9.91E-18 | hypothetical protein                                             |
| TGME49_323110 | 3.13   | 6.57  | 8.71E-20 | 1.04E-17 | hypothetical protein                                             |
| TGME49_250115 | 2.68   | 8.62  | 8.73E-20 | 1.04E-17 | hypothetical protein                                             |
| TGME49_243930 | 1.98   | 8.91  | 1.24E-19 | 1.46E-17 | hypothetical protein                                             |
| TGME49_314970 | -5.24  | 7.00  | 2.79E-19 | 3.21E-17 | root hair defective 3 gtp-binding protein (rhd3) protein         |
| TGME49_218520 | 1.83   | 10.68 | 3.02E-19 | 3.43E-17 | microneme protein MIC6                                           |
| TGME49_257380 | 1.95   | 8.77  | 3.11E-19 | 3.49E-17 | hypothetical protein                                             |
| TGME49_251170 | 3.55   | 6.54  | 1.09E-18 | 1.20E-16 | KRUF family protein                                              |
| TGME49_276170 | 2.06   | 9.19  | 1.70E-18 | 1.85E-16 | phosphatidylinositol 3- and 4-kinase                             |
| TGME49_219120 | 1.77   | 8.62  | 3.72E-18 | 4.00E-16 | zinc finger (CCCH type) motif-containing protein                 |
| TGME49_236890 | 2.15   | 7.52  | 3.83E-18 | 4.05E-16 | hypothetical protein                                             |
| TGME49_277080 | 1.90   | 10.94 | 2.69E-17 | 2.73E-15 | microneme protein MIC5                                           |
| TGME49_228170 | 2.17   | 9.45  | 2.77E-17 | 2.78E-15 | inner membrane complex protein IMC2A                             |
| TGME49_225540 | 1.96   | 8.19  | 3.10E-17 | 3.07E-15 | hypothetical protein                                             |
| TGME49_233140 | -10.27 | 6.89  | 5.69E-17 | 5.50E-15 | deoxyuridine 5'-triphosphate nucleotidohydrolase, putative       |
| TGME49_259950 | 2.49   | 7.58  | 6.12E-17 | 5.84E-15 | carbonate dehydratase, eukaryotic-type domain-containing protein |
| TGME49_214940 | 1.94   | 10.92 | 6.55E-17 | 6.17E-15 | MIC2-associated protein M2AP                                     |
| TGME49_305980 | -10.15 | 7.01  | 8.00E-17 | 7.39E-15 | pyruvate dehydrogenase complex subunit PDH-E3I                   |
| TGME49_243730 | 1.73   | 10.33 | 8.03E-17 | 7.39E-15 | roptry protein ROP9                                              |
| TGME49_286470 | 2.65   | 8.81  | 8.37E-17 | 7.61E-15 | AGC kinase                                                       |
| TGME49_202020 | 2.76   | 8.16  | 1.12E-16 | 1.00E-14 | DnAK-TPR                                                         |
| TGME49_222130 | 2.68   | 7.05  | 1.44E-16 | 1.28E-14 | hypothetical protein                                             |
| TGME49_321360 | 2.18   | 7.92  | 1.61E-16 | 1.41E-14 | clustered-asparagine-rich protein                                |
| TGME49_206610 | -9.64  | 6.27  | 1.70E-16 | 1.46E-14 | pyruvate dehydrogenase complex subunit PDH-E2                    |
| TGME49_226020 | 1.83   | 9.12  | 1.81E-16 | 1.54E-14 | transporter, major facilitator family protein                    |

|               |       |       |          |          |                                                                      |
|---------------|-------|-------|----------|----------|----------------------------------------------------------------------|
| TGME49_212900 | 1.93  | 7.94  | 2.67E-16 | 2.24E-14 | hypothetical protein                                                 |
| TGME49_298980 | 2.32  | 7.26  | 2.71E-16 | 2.25E-14 | RNA pseudouridine synthase superfamily protein                       |
| TGME49_307820 | 2.86  | 6.37  | 3.92E-16 | 3.23E-14 | hypothetical protein                                                 |
| TGME49_270320 | 2.09  | 8.41  | 4.34E-16 | 3.49E-14 | protein phosphatase 2C domain-containing protein                     |
| TGME49_252190 | 2.83  | 6.82  | 4.93E-16 | 3.93E-14 | KRUF family protein                                                  |
| TGME49_246550 | 1.90  | 9.67  | 5.50E-16 | 4.34E-14 | aspartyl protease ASP3                                               |
| TGME49_289540 | 1.84  | 8.25  | 6.21E-16 | 4.85E-14 | hypothetical protein                                                 |
| TGME49_268860 | 4.55  | 5.85  | 7.81E-16 | 6.04E-14 | enolase 1                                                            |
| TGME49_217740 | -6.72 | 6.50  | 1.05E-15 | 7.97E-14 | 3-ketoacyl-(acyl-carrier-protein) reductase                          |
| TGME49_293260 | 2.21  | 8.31  | 1.12E-15 | 8.38E-14 | ATPase/histidine kinase/DNA gyrase B/HSP90 domain-containing protein |
| TGME49_227100 | 5.99  | 4.82  | 1.76E-15 | 1.31E-13 | hypothetical protein                                                 |
| TGME49_209060 | -9.60 | 6.36  | 1.93E-15 | 1.42E-13 | thrombospondin type 1 domain-containing protein                      |
| TGME49_221320 | -4.92 | 8.67  | 1.96E-15 | 1.43E-13 | acetyl-CoA carboxylase ACC1                                          |
| TGME49_313910 | 1.86  | 10.58 | 4.09E-15 | 2.95E-13 | RNA recognition motif 2 protein                                      |
| TGME49_252070 | 4.04  | 5.64  | 4.74E-15 | 3.39E-13 | KRUF family protein                                                  |
| TGME49_203310 | 1.77  | 11.75 | 5.05E-15 | 3.55E-13 | dense granule protein GRA7                                           |
| TGME49_232670 | 1.76  | 8.87  | 5.66E-15 | 3.94E-13 | hypothetical protein                                                 |
| TGME49_200360 | 2.02  | 9.94  | 6.55E-15 | 4.48E-13 | hypothetical protein                                                 |
| TGME49_221590 | 1.92  | 8.97  | 6.85E-15 | 4.60E-13 | dual specificity phosphatase, catalytic domain-containing protein    |
| TGME49_277230 | 3.94  | 5.13  | 9.95E-15 | 6.63E-13 | hypothetical protein                                                 |
| TGME49_212270 | 2.04  | 9.54  | 1.41E-14 | 9.30E-13 | hypothetical protein                                                 |
| TGME49_254470 | 1.94  | 9.52  | 1.58E-14 | 1.04E-12 | hypothetical protein                                                 |
| TGME49_232000 | 2.06  | 8.50  | 1.65E-14 | 1.07E-12 | hypothetical protein                                                 |
| TGME49_296340 | 3.99  | 5.50  | 1.72E-14 | 1.11E-12 | hypothetical protein                                                 |
| TGME49_225170 | 2.77  | 6.06  | 2.06E-14 | 1.32E-12 | hypothetical protein                                                 |
| TGME49_297400 | 1.90  | 7.67  | 2.29E-14 | 1.45E-12 | hypothetical protein                                                 |
| TGME49_277260 | 2.20  | 10.15 | 2.44E-14 | 1.53E-12 | hypothetical protein                                                 |
| TGME49_304500 | 1.63  | 8.38  | 3.57E-14 | 2.23E-12 | hypothetical protein                                                 |
| TGME49_215360 | 2.87  | 6.36  | 3.83E-14 | 2.37E-12 | hypothetical protein                                                 |
| TGME49_259020 | 3.96  | 7.36  | 3.89E-14 | 2.39E-12 | bradyzoite antigen BAG1                                              |
| TGME49_252640 | 4.18  | 6.77  | 4.01E-14 | 2.44E-12 | P-type ATPase PMA1                                                   |
| TGME49_269690 | 2.27  | 8.26  | 4.19E-14 | 2.53E-12 | hypothetical protein                                                 |
| TGME49_253690 | 2.11  | 9.24  | 5.89E-14 | 3.47E-12 | hypothetical protein                                                 |
| TGME49_247220 | 1.64  | 8.86  | 7.02E-14 | 4.11E-12 | nudix -type motif 9 isoform a family protein                         |
| TGME49_247360 | 2.27  | 7.63  | 7.20E-14 | 4.18E-12 | PAP2 superfamily protein                                             |
| TGME49_262400 | 1.91  | 8.80  | 7.37E-14 | 4.24E-12 | lipase                                                               |
| TGME49_254120 | 1.76  | 8.69  | 8.45E-14 | 4.80E-12 | autophagy-related protein 8 atg8, putative                           |
| TGME49_280380 | 1.68  | 10.07 | 8.51E-14 | 4.80E-12 | poly(ADP-ribose) glycohydrolase                                      |
| TGME49_323400 | 3.25  | 8.61  | 1.56E-13 | 8.76E-12 | cytochrome c oxidase subunit iii subfamily protein                   |
| TGME49_263550 | 2.42  | 7.01  | 1.69E-13 | 9.40E-12 | 39S ribosomal protein L47, mitochondrial precursor, putative         |
| TGME49_287460 | 3.19  | 5.08  | 1.81E-13 | 1.00E-11 | hypothetical protein                                                 |
| TGME49_246130 | 1.87  | 8.43  | 1.89E-13 | 1.03E-11 | serpin (serine proteinase inhibitor) superfamily protein             |
| TGME49_264870 | 2.11  | 7.67  | 1.90E-13 | 1.03E-11 | Sodium:neurotransmitter symporter family protein                     |
| TGME49_209100 | -9.29 | 6.06  | 2.04E-13 | 1.10E-11 | PUB domain-containing protein                                        |

|               |       |       |          |          |                                                                        |
|---------------|-------|-------|----------|----------|------------------------------------------------------------------------|
| TGME49_240090 | 2.18  | 8.84  | 2.44E-13 | 1.30E-11 | roptry kinase family protein ROP34, putative                           |
| TGME49_304740 | 1.68  | 8.68  | 2.70E-13 | 1.43E-11 | roptry kinase family protein ROP35                                     |
| TGME49_204520 | 3.03  | 5.24  | 2.79E-13 | 1.47E-11 | hypothetical protein                                                   |
| TGME49_201780 | 1.83  | 10.52 | 3.35E-13 | 1.75E-11 | microneme protein MIC2                                                 |
| TGME49_213050 | 2.09  | 8.68  | 3.77E-13 | 1.94E-11 | hypothetical protein                                                   |
| TGME49_208020 | 3.45  | 5.27  | 4.19E-13 | 2.15E-11 | AP2 domain transcription factor AP2Ib-1                                |
| TGME49_319640 | 1.76  | 8.29  | 4.31E-13 | 2.19E-11 | hypothetical protein                                                   |
| TGME49_250710 | 1.75  | 11.55 | 4.37E-13 | 2.21E-11 | microneme protein MIC10                                                |
| TGME49_232410 | 1.61  | 9.84  | 4.43E-13 | 2.22E-11 | PDI family protein                                                     |
| TGME49_253440 | 1.50  | 9.12  | 4.79E-13 | 2.39E-11 | cell-cycle-associated protein kinase SRPK, putative                    |
| TGME49_214440 | 1.78  | 9.01  | 6.38E-13 | 3.16E-11 | 4'-phosphopantetheinyl transferase superfamily protein                 |
| TGME49_313760 | 1.52  | 8.19  | 6.42E-13 | 3.16E-11 | hypothetical protein                                                   |
| TGME49_314430 | 1.61  | 9.84  | 7.51E-13 | 3.68E-11 | serine/threonine specific protein phosphatase                          |
| TGME49_291940 | -6.49 | 6.35  | 8.70E-13 | 4.23E-11 | hypothetical protein                                                   |
| TGME49_260620 | 1.62  | 8.18  | 8.92E-13 | 4.31E-11 | hypothetical protein                                                   |
| TGME49_297650 | 1.85  | 8.52  | 1.04E-12 | 5.01E-11 | Ser/Thr phosphatase family protein                                     |
| TGME49_225790 | 2.37  | 7.65  | 1.06E-12 | 5.04E-11 | PDI family protein                                                     |
| TGME49_293252 | 5.73  | 5.29  | 1.16E-12 | 5.52E-11 | hypothetical protein                                                   |
| TGME49_231430 | -4.50 | 6.39  | 1.24E-12 | 5.83E-11 | oligosaccharyl transferase stt3 protein, putative                      |
| TGME49_233380 | 1.51  | 10.22 | 1.42E-12 | 6.56E-11 | hypothetical protein                                                   |
| TGME49_314700 | 2.10  | 7.49  | 1.57E-12 | 7.24E-11 | hypothetical protein                                                   |
| TGME49_310130 | -6.15 | 6.00  | 1.64E-12 | 7.49E-11 | Spc97 / Spc98 family protein                                           |
| TGME49_291040 | 2.94  | 7.28  | 1.75E-12 | 7.96E-11 | lactate dehydrogenase LDH2                                             |
| TGME49_315910 | 2.18  | 6.01  | 2.67E-12 | 1.19E-10 | hypothetical protein                                                   |
| TGME49_310520 | 2.51  | 5.61  | 2.70E-12 | 1.20E-10 | 3'5'-cyclic nucleotide phosphodiesterase domain-containing protein     |
| TGME49_209140 | -5.74 | 6.69  | 2.87E-12 | 1.26E-10 | anti-silencing protein, ASF1 family protein                            |
| TGME49_220240 | 1.89  | 9.13  | 2.93E-12 | 1.28E-10 | hypothetical protein                                                   |
| TGME49_215895 | 2.52  | 6.46  | 3.10E-12 | 1.35E-10 | AP2 domain-containing protein                                          |
| TGME49_216680 | -5.08 | 7.09  | 3.17E-12 | 1.37E-10 | ankyrin repeat-containing protein                                      |
| TGME49_244530 | 1.75  | 8.75  | 3.36E-12 | 1.44E-10 | hypothetical protein                                                   |
| TGME49_254390 | 2.10  | 7.74  | 3.65E-12 | 1.56E-10 | CRAL/TRIO domain-containing protein                                    |
| TGME49_286460 | 4.54  | 4.91  | 4.15E-12 | 1.75E-10 | hypothetical protein                                                   |
| TGME49_253560 | 2.68  | 6.24  | 5.04E-12 | 2.12E-10 | hypothetical protein                                                   |
| TGME49_228160 | 2.08  | 7.19  | 6.36E-12 | 2.64E-10 | acid phosphatase                                                       |
| TGME49_294980 | 2.96  | 6.15  | 7.10E-12 | 2.94E-10 | hypothetical protein                                                   |
| TGME49_222020 | -4.34 | 6.30  | 7.85E-12 | 3.19E-10 | phosphoglycerate kinase PGKII                                          |
| TGME49_225160 | 1.72  | 7.70  | 8.91E-12 | 3.59E-10 | hypothetical protein                                                   |
| TGME49_276930 | 1.62  | 8.24  | 9.59E-12 | 3.82E-10 | hypothetical protein                                                   |
| TGME49_209985 | 2.61  | 6.55  | 1.25E-11 | 4.95E-10 | cAMP-dependent protein kinase                                          |
| TGME49_229930 | 1.87  | 7.67  | 1.31E-11 | 5.17E-10 | p25-alpha family protein                                               |
| TGME49_247530 | 1.79  | 8.80  | 1.65E-11 | 6.39E-10 | hypothetical protein                                                   |
| TGME49_218540 | -4.61 | 6.89  | 1.81E-11 | 6.93E-10 | peptidase S15, putative                                                |
| TGME49_309580 | -9.07 | 6.13  | 1.90E-11 | 7.25E-10 | transporter, major facilitator family protein                          |
| TGME49_266310 | -5.93 | 5.84  | 2.03E-11 | 7.67E-10 | Alpha-1,3-mannosyl-glycoprotein 2-beta-N-acetylglucosaminyltransferase |
| TGME49_293770 | 1.91  | 8.29  | 2.50E-11 | 9.38E-10 | chitinase-like protein CLP1                                            |
| TGME49_275640 | 2.11  | 7.24  | 2.52E-11 | 9.42E-10 | hypothetical protein                                                   |
| TGME49_239420 | 1.44  | 9.53  | 2.60E-11 | 9.66E-10 | protein kinase                                                         |
| TGME49_254000 | 1.79  | 7.49  | 3.40E-11 | 1.26E-09 | hypothetical protein                                                   |

|               |       |       |          |          |                                                                          |
|---------------|-------|-------|----------|----------|--------------------------------------------------------------------------|
| TGME49_305460 | 2.12  | 7.84  | 4.84E-11 | 1.77E-09 | methionine aminopeptidase 2, putative                                    |
| TGME49_250220 | 2.58  | 6.34  | 5.99E-11 | 2.19E-09 | hypothetical protein                                                     |
| TGME49_323100 | 1.90  | 7.08  | 6.33E-11 | 2.29E-09 | hypothetical protein                                                     |
| TGME49_263560 | 2.29  | 7.61  | 9.68E-11 | 3.48E-09 | hypothetical protein                                                     |
| TGME49_266760 | -6.67 | 6.61  | 1.06E-10 | 3.78E-09 | isocitrate dehydrogenase                                                 |
| TGME49_210682 | 3.75  | 6.03  | 1.06E-10 | 3.78E-09 | hypothetical protein                                                     |
| TGME49_312160 | 1.82  | 8.48  | 1.41E-10 | 4.99E-09 | hypothetical protein                                                     |
| TGME49_255260 | 1.67  | 10.88 | 1.79E-10 | 6.28E-09 | apical membrane antigen AMA1                                             |
| TGME49_227390 | -8.52 | 5.36  | 2.09E-10 | 7.32E-09 | hypothetical protein                                                     |
| TGME49_286000 | 3.36  | 5.05  | 2.18E-10 | 7.60E-09 | hypothetical protein                                                     |
| TGME49_316710 | 2.21  | 7.67  | 2.50E-10 | 8.64E-09 | hypothetical protein                                                     |
| TGME49_208590 | 1.56  | 7.67  | 2.94E-10 | 1.00E-08 | vacuolar ATP synthase subunit 54kD, putative                             |
| TGME49_288210 | -8.82 | 5.82  | 3.15E-10 | 1.06E-08 | PUL domain-containing protein                                            |
| TGME49_306620 | 2.37  | 6.77  | 3.71E-10 | 1.24E-08 | AP2 domain transcription factor AP2IX-9                                  |
| TGME49_275420 | -4.88 | 6.20  | 3.78E-10 | 1.26E-08 | histone lysine-specific demethylase LSD1/BHC110/KDMA1A                   |
| TGME49_209900 | -5.24 | 6.34  | 4.03E-10 | 1.34E-08 | hypothetical protein                                                     |
| TGME49_253470 | 1.78  | 7.73  | 4.10E-10 | 1.35E-08 | alveolin domain containing intermediate filament IMC13                   |
| TGME49_288650 | 1.57  | 11.92 | 4.23E-10 | 1.39E-08 | dense granule protein GRA12                                              |
| TGME49_300055 | 1.35  | 8.47  | 4.43E-10 | 1.45E-08 | hypothetical protein                                                     |
| TGME49_217530 | 3.83  | 5.85  | 4.83E-10 | 1.57E-08 | hypothetical protein                                                     |
| TGME49_255180 | -5.14 | 6.02  | 5.00E-10 | 1.62E-08 | ubiquitin carboxyl-terminal hydrolase                                    |
| TGME49_226310 | -4.66 | 7.37  | 5.48E-10 | 1.76E-08 | zinc finger (CCCH type) motif-containing protein                         |
| TGME49_259880 | 1.86  | 6.83  | 6.21E-10 | 1.98E-08 | hypothetical protein                                                     |
| TGME49_212250 | 1.77  | 7.91  | 6.57E-10 | 2.07E-08 | XPG N-terminal domain-containing protein                                 |
| TGME49_215550 | -8.72 | 5.82  | 6.92E-10 | 2.18E-08 | hypothetical protein                                                     |
| TGME49_213635 | 4.34  | 5.89  | 7.70E-10 | 2.41E-08 | hypothetical protein                                                     |
| TGME49_288840 | 2.10  | 7.53  | 8.37E-10 | 2.60E-08 | hypothetical protein                                                     |
| TGME49_222948 | -8.96 | 5.77  | 8.46E-10 | 2.62E-08 | hypothetical protein                                                     |
| TGME49_232750 | 1.73  | 7.12  | 9.19E-10 | 2.83E-08 | 23S rRNA (adenine(1618)-N(6))-methyltransferase, putative                |
| TGME49_270260 | 3.39  | 4.99  | 9.31E-10 | 2.85E-08 | hypothetical protein                                                     |
| TGME49_253750 | 1.53  | 8.32  | 9.34E-10 | 2.85E-08 | PLU-1 family protein                                                     |
| TGME49_295420 | 1.78  | 8.00  | 9.83E-10 | 2.99E-08 | hypothetical protein                                                     |
| TGME49_315680 | -8.86 | 5.71  | 1.07E-09 | 3.22E-08 | vacuolar protein sorting-associated protein vps4, putative               |
| TGME49_321630 | 1.67  | 6.76  | 1.16E-09 | 3.50E-08 | RNA recognition motif-containing protein                                 |
| TGME49_284010 | -8.39 | 5.23  | 1.27E-09 | 3.80E-08 | 5'-3' exonuclease, N-terminal resolvase family domain-containing protein |
| TGME49_269310 | 3.72  | 4.56  | 1.30E-09 | 3.89E-08 | hypothetical protein                                                     |
| TGME49_222240 | 2.10  | 7.03  | 1.46E-09 | 4.29E-08 | hypothetical protein                                                     |
| TGME49_217750 | -9.01 | 5.70  | 1.52E-09 | 4.44E-08 | hypothetical protein                                                     |
| TGME49_288000 | 2.12  | 7.50  | 1.63E-09 | 4.75E-08 | hypothetical protein                                                     |
| TGME49_251540 | 1.18  | 9.20  | 1.76E-09 | 5.08E-08 | dense granule protein GRA9                                               |
| TGME49_209755 | 2.81  | 7.50  | 1.77E-09 | 5.08E-08 | hypothetical protein                                                     |
| TGME49_219590 | 1.90  | 7.26  | 1.81E-09 | 5.18E-08 | RuvB family 1 protein                                                    |
| TGME49_290190 | 1.81  | 6.70  | 2.02E-09 | 5.72E-08 | hypothetical protein                                                     |
| TGME49_220440 | -4.80 | 5.75  | 2.40E-09 | 6.77E-08 | cyclin-dependent kinase regulatory subunit protein                       |
| TGME49_260540 | 1.60  | 7.84  | 2.78E-09 | 7.80E-08 | alveolin domain containing intermediate filament IMC14                   |

|               |       |      |          |          |                                                                     |
|---------------|-------|------|----------|----------|---------------------------------------------------------------------|
| TGME49_220890 | 1.77  | 6.85 | 3.02E-09 | 8.39E-08 | hypothetical protein                                                |
| TGME49_232160 | 1.48  | 7.26 | 3.26E-09 | 9.01E-08 | zinc finger, C3HC4 type (RING finger) domain-containing protein     |
| TGME49_216500 | -8.82 | 5.73 | 3.30E-09 | 9.07E-08 | tRNA synthetase, putative                                           |
| TGME49_261790 | -9.05 | 5.96 | 3.44E-09 | 9.38E-08 | hypothetical protein                                                |
| TGME49_245490 | 1.68  | 9.25 | 4.14E-09 | 1.12E-07 | microneme protein MIC8                                              |
| TGME49_202580 | 2.18  | 6.60 | 4.53E-09 | 1.21E-07 | ATPase, AAA family protein                                          |
| TGME49_243470 | 3.58  | 4.96 | 4.81E-09 | 1.28E-07 | hypothetical protein                                                |
| TGME49_244450 | 3.01  | 5.42 | 5.95E-09 | 1.56E-07 | protein phosphatase 2C domain-containing protein                    |
| TGME49_249230 | 2.26  | 6.44 | 6.20E-09 | 1.62E-07 | hypothetical protein                                                |
| TGME49_268010 | -8.58 | 5.46 | 7.13E-09 | 1.82E-07 | hypothetical protein                                                |
| TGME49_299030 | 1.68  | 7.72 | 8.06E-09 | 2.05E-07 | RNA recognition motif 2 protein                                     |
| TGME49_265400 | -5.11 | 6.52 | 8.57E-09 | 2.17E-07 | hypothetical protein                                                |
| TGME49_226520 | 1.96  | 6.25 | 8.80E-09 | 2.22E-07 | hypothetical protein                                                |
| TGME49_293280 | 2.44  | 5.66 | 8.97E-09 | 2.26E-07 | cyclin protein                                                      |
| TGME49_312105 | -8.91 | 5.62 | 9.61E-09 | 2.40E-07 | hypothetical protein                                                |
| TGME49_222050 | 1.45  | 7.23 | 9.63E-09 | 2.40E-07 | hypothetical protein                                                |
| TGME49_274150 | -8.45 | 5.49 | 9.71E-09 | 2.41E-07 | hypothetical protein                                                |
| TGME49_254710 | 1.70  | 7.63 | 1.00E-08 | 2.48E-07 | serine esterase (DUF676) protein                                    |
| TGME49_215210 | 2.30  | 6.28 | 1.11E-08 | 2.73E-07 | hypothetical protein                                                |
| TGME49_221350 | -4.63 | 5.57 | 1.12E-08 | 2.76E-07 | Ctr copper transporter family protein                               |
| TGME49_221840 | 2.64  | 5.63 | 1.19E-08 | 2.89E-07 | hypothetical protein                                                |
| TGME49_268225 | -9.66 | 6.16 | 1.71E-08 | 4.11E-07 | hypothetical protein                                                |
| TGME49_265460 | 2.08  | 6.31 | 1.91E-08 | 4.55E-07 | hypothetical protein                                                |
| TGME49_249540 | 1.55  | 7.42 | 1.94E-08 | 4.60E-07 | hypothetical protein                                                |
| TGME49_266920 | 1.73  | 9.58 | 2.01E-08 | 4.75E-07 | 3'-5'-cyclic nucleotide phosphodiesterase domain-containing protein |
| TGME49_268230 | -9.26 | 5.82 | 2.14E-08 | 5.02E-07 | hypothetical protein                                                |
| TGME49_226580 | 1.42  | 7.95 | 2.21E-08 | 5.15E-07 | hypothetical protein                                                |
| TGME49_234530 | 1.56  | 7.27 | 2.22E-08 | 5.16E-07 | hypothetical protein                                                |
| TGME49_248110 | 1.59  | 7.94 | 2.38E-08 | 5.49E-07 | hypothetical protein                                                |
| TGME49_202572 | -8.42 | 5.40 | 2.51E-08 | 5.74E-07 | ribophorin i protein                                                |
| TGME49_220390 | 1.60  | 7.34 | 2.54E-08 | 5.79E-07 | hypothetical protein                                                |
| TGME49_315440 | 1.66  | 7.45 | 2.65E-08 | 5.99E-07 | hypothetical protein                                                |
| TGME49_223750 | 1.86  | 6.43 | 2.76E-08 | 6.20E-07 | hypothetical protein                                                |
| TGME49_244300 | -8.49 | 5.33 | 2.80E-08 | 6.26E-07 | hypothetical protein                                                |
| TGME49_258710 | -4.42 | 6.17 | 2.88E-08 | 6.41E-07 | T-complex protein 10 C-terminus protein                             |
| TGME49_202770 | 1.16  | 9.06 | 4.04E-08 | 8.73E-07 | RNA recognition motif-containing protein                            |
| TGME49_232035 | -5.45 | 5.47 | 4.35E-08 | 9.37E-07 | hypothetical protein                                                |
| TGME49_254690 | 1.39  | 8.49 | 4.44E-08 | 9.54E-07 | phospholipase/carboxylesterase                                      |
| TGME49_280370 | 1.29  | 9.18 | 4.55E-08 | 9.75E-07 | hypothetical protein                                                |
| TGME49_242845 | -8.83 | 5.62 | 4.59E-08 | 9.78E-07 | hypothetical protein                                                |
| TGME49_226990 | 2.15  | 5.68 | 4.59E-08 | 9.78E-07 | hypothetical protein                                                |
| TGME49_207100 | -4.76 | 5.64 | 4.66E-08 | 9.89E-07 | hypothetical protein                                                |
| TGME49_219810 | 1.54  | 8.73 | 4.70E-08 | 9.97E-07 | hypothetical protein                                                |
| TGME49_280522 | 1.95  | 7.21 | 4.79E-08 | 1.01E-06 | hypothetical protein                                                |
| TGME49_315950 | 1.24  | 8.56 | 5.07E-08 | 1.06E-06 | zinc finger, C3HC4 type (RING finger) domain-containing protein     |
| TGME49_212940 | -8.65 | 5.91 | 5.19E-08 | 1.08E-06 | hypothetical protein                                                |
| TGME49_203060 | 1.66  | 7.56 | 5.19E-08 | 1.08E-06 | hypothetical protein                                                |
| TGME49_269130 | -8.01 | 5.02 | 5.20E-08 | 1.08E-06 | hypothetical protein                                                |
| TGME49_258030 | -4.43 | 5.87 | 5.39E-08 | 1.12E-06 | DNA polymerase                                                      |

|               |       |       |          |          |                                                                                 |
|---------------|-------|-------|----------|----------|---------------------------------------------------------------------------------|
| TGME49_224970 | 1.48  | 7.01  | 5.53E-08 | 1.14E-06 | nucleolar protein,nop52 protein                                                 |
| TGME49_221180 | 1.55  | 8.39  | 5.87E-08 | 1.21E-06 | hypothetical protein                                                            |
| TGME49_311230 | 1.38  | 9.71  | 5.90E-08 | 1.21E-06 | hypothetical protein                                                            |
| TGME49_247300 | 1.29  | 8.26  | 6.94E-08 | 1.41E-06 | hypothetical protein                                                            |
| TGME49_319590 | -5.10 | 5.29  | 7.33E-08 | 1.48E-06 | hypothetical protein                                                            |
| TGME49_240780 | 2.25  | 5.15  | 7.93E-08 | 1.60E-06 | hypothetical protein                                                            |
| TGME49_208310 | 1.90  | 6.42  | 8.01E-08 | 1.61E-06 | hypothetical protein                                                            |
| TGME49_254920 | 2.66  | 5.18  | 8.43E-08 | 1.69E-06 | hypothetical protein                                                            |
| TGME49_221480 | 1.67  | 8.37  | 1.03E-07 | 2.04E-06 | hypothetical protein                                                            |
| TGME49_204530 | 1.64  | 11.14 | 1.11E-07 | 2.21E-06 | microneme protein MIC11                                                         |
| TGME49_213730 | 1.31  | 7.71  | 1.22E-07 | 2.40E-06 | lanthionine synthetase C family protein                                         |
| TGME49_293270 | 1.22  | 7.47  | 1.25E-07 | 2.45E-06 | hypothetical protein                                                            |
| TGME49_304880 | 1.59  | 7.59  | 1.38E-07 | 2.66E-06 | hypothetical protein                                                            |
| TGME49_252420 | 2.21  | 5.41  | 1.38E-07 | 2.66E-06 | histone arginine methyltransferase PRMT3                                        |
| TGME49_265790 | 1.27  | 8.72  | 1.49E-07 | 2.85E-06 | hypothetical protein                                                            |
| TGME49_270865 | 1.35  | 7.55  | 1.50E-07 | 2.86E-06 | adenylate cyclase, putative                                                     |
| TGME49_269950 | 1.18  | 9.55  | 1.50E-07 | 2.86E-06 | hypothetical protein                                                            |
| TGME49_245630 | 1.58  | 7.26  | 1.60E-07 | 3.03E-06 | hypothetical protein                                                            |
| TGME49_220330 | -7.99 | 5.03  | 1.76E-07 | 3.30E-06 | hypothetical protein                                                            |
| TGME49_215160 | 1.29  | 8.85  | 1.85E-07 | 3.46E-06 | hypothetical protein                                                            |
| TGME49_231890 | -8.61 | 5.55  | 1.94E-07 | 3.63E-06 | beta-ketoacyl-acyl carrier protein synthase III, putative                       |
| TGME49_310210 | 1.97  | 6.30  | 1.95E-07 | 3.63E-06 | hypothetical protein                                                            |
| TGME49_225680 | -8.69 | 5.26  | 1.95E-07 | 3.63E-06 | hypothetical protein                                                            |
| TGME49_242640 | 1.52  | 6.95  | 1.97E-07 | 3.66E-06 | hypothetical protein                                                            |
| TGME49_255690 | -8.33 | 5.25  | 1.98E-07 | 3.66E-06 | 2-C-methyl-D-erythritol 2,4-cyclodiphosphate synthase domain-containing protein |
| TGME49_253640 | 1.48  | 7.00  | 2.22E-07 | 4.07E-06 | hypothetical protein                                                            |
| TGME49_237500 | 1.28  | 7.49  | 2.29E-07 | 4.19E-06 | protein phosphatase 2C domain-containing protein                                |
| TGME49_308040 | 2.22  | 6.34  | 2.31E-07 | 4.21E-06 | ZPR1 zinc finger domain-containing protein                                      |
| TGME49_211460 | 1.37  | 7.65  | 2.43E-07 | 4.42E-06 | hypothetical protein                                                            |
| TGME49_300048 | 1.43  | 7.13  | 2.47E-07 | 4.48E-06 | hypothetical protein                                                            |
| TGME49_250730 | 1.91  | 7.22  | 2.56E-07 | 4.64E-06 | 60S ribosomal protein L7-B, putative                                            |
| TGME49_306040 | 1.39  | 6.98  | 2.57E-07 | 4.65E-06 | CHY zinc finger protein                                                         |
| TGME49_315100 | 2.95  | 5.66  | 2.74E-07 | 4.92E-06 | hypothetical protein                                                            |
| TGME49_250950 | 2.85  | 5.69  | 2.77E-07 | 4.95E-06 | KRUF family protein                                                             |
| TGME49_202520 | 1.93  | 6.95  | 2.78E-07 | 4.95E-06 | hypothetical protein                                                            |
| TGME49_257080 | 1.53  | 7.01  | 2.90E-07 | 5.14E-06 | 3'5'-cyclic nucleotide phosphodiesterase domain-containing protein              |
| TGME49_205180 | 1.15  | 8.28  | 2.93E-07 | 5.16E-06 | RNA recognition motif-containing protein                                        |
| TGME49_266450 | -4.66 | 5.92  | 2.94E-07 | 5.16E-06 | lysine decarboxylase family protein                                             |
| TGME49_315280 | -8.97 | 5.60  | 2.98E-07 | 5.21E-06 | hypothetical protein                                                            |
| TGME49_330000 | 2.51  | 9.57  | 3.16E-07 | 5.49E-06 | cytochrome b                                                                    |
| TGME49_207065 | -5.31 | 5.36  | 3.17E-07 | 5.49E-06 | hypothetical protein                                                            |
| TGME49_209095 | -4.32 | 6.51  | 3.57E-07 | 6.15E-06 | hypothetical protein                                                            |
| TGME49_238510 | -4.93 | 5.09  | 4.01E-07 | 6.78E-06 | hypothetical protein                                                            |
| TGME49_232340 | 1.32  | 8.41  | 4.30E-07 | 7.23E-06 | protein phosphatase 2C domain-containing protein                                |
| TGME49_250100 | 2.76  | 6.91  | 4.32E-07 | 7.25E-06 | hypothetical protein                                                            |
| TGME49_228980 | -8.09 | 4.76  | 4.35E-07 | 7.27E-06 | hypothetical protein                                                            |
| TGME49_321450 | 1.47  | 7.51  | 4.40E-07 | 7.35E-06 | Myb family DNA-binding domain-containing protein                                |



|               |       |      |          |          |                                                                                      |
|---------------|-------|------|----------|----------|--------------------------------------------------------------------------------------|
| TGME49_260410 | -8.05 | 5.12 | 4.62E-07 | 7.67E-06 | hypothetical protein                                                                 |
| TGME49_225990 | -9.17 | 5.87 | 4.62E-07 | 7.67E-06 | acyl transferase domain-containing protein                                           |
| TGME49_205490 | 1.22  | 8.17 | 4.97E-07 | 8.22E-06 | integral membrane protein, putative                                                  |
| TGME49_236800 | -7.92 | 4.83 | 5.05E-07 | 8.31E-06 | hypothetical protein                                                                 |
| TGME49_257350 | 1.54  | 8.63 | 5.29E-07 | 8.69E-06 | eukaryotic translation initiation factor, putative                                   |
| TGME49_223660 | 2.80  | 7.51 | 5.52E-07 | 9.01E-06 | 50S ribosomal protein L4, putative                                                   |
| TGME49_306890 | 2.18  | 5.76 | 5.73E-07 | 9.28E-06 | hypothetical protein                                                                 |
| TGME49_230180 | 1.89  | 8.98 | 6.09E-07 | 9.78E-06 | hypothetical protein                                                                 |
| TGME49_203280 | 1.88  | 5.91 | 6.12E-07 | 9.80E-06 | hypothetical protein                                                                 |
| TGME49_268680 | 1.39  | 7.20 | 6.16E-07 | 9.84E-06 | hypothetical protein                                                                 |
| TGME49_223390 | 1.09  | 8.03 | 6.28E-07 | 9.99E-06 | activating signal cointegrator 1 complex subunit 3 family 1 ASCC3L1, putative        |
| TGME49_206450 | 1.74  | 8.16 | 6.43E-07 | 1.02E-05 | autophagy-related cysteine peptidase atg4, putative                                  |
| TGME49_273970 | -7.87 | 4.79 | 6.58E-07 | 1.04E-05 | CorA family Mg <sup>2+</sup> transporter protein                                     |
| TGME49_277270 | 1.32  | 9.98 | 6.86E-07 | 1.08E-05 | NTPase II                                                                            |
| TGME49_263420 | -6.06 | 6.00 | 7.40E-07 | 1.16E-05 | ubiquitin-specific protease USP4                                                     |
| TGME49_239710 | -8.73 | 5.40 | 7.48E-07 | 1.16E-05 | phosphomannomutase                                                                   |
| TGME49_286480 | 2.85  | 6.43 | 8.35E-07 | 1.29E-05 | hypothetical protein                                                                 |
| TGME49_278230 | -8.10 | 5.09 | 8.62E-07 | 1.33E-05 | prenyltransferase and squalene oxidase repeat-containing protein                     |
| TGME49_207930 | 1.58  | 6.29 | 9.06E-07 | 1.38E-05 | phosphatidylethanolamine-binding protein                                             |
| TGME49_219820 | 1.57  | 8.21 | 9.16E-07 | 1.39E-05 | polyubiquitin UbC, putative                                                          |
| TGME49_258870 | 1.39  | 9.49 | 9.26E-07 | 1.41E-05 | hypothetical protein                                                                 |
| TGME49_243430 | 2.29  | 7.80 | 9.79E-07 | 1.47E-05 | OTU family cysteine protease                                                         |
| TGME49_215910 | 1.01  | 9.02 | 1.08E-06 | 1.62E-05 | hypothetical protein                                                                 |
| TGME49_259200 | -8.68 | 5.46 | 1.12E-06 | 1.66E-05 | Na <sup>+</sup> /H <sup>+</sup> exchanger NHE1                                       |
| TGME49_225900 | 1.89  | 6.25 | 1.13E-06 | 1.68E-05 | hypothetical protein                                                                 |
| TGME49_251400 | 2.12  | 5.90 | 1.15E-06 | 1.70E-05 | hypothetical protein                                                                 |
| TGME49_200450 | -8.12 | 5.23 | 1.18E-06 | 1.73E-05 | hypothetical protein                                                                 |
| TGME49_242810 | -8.36 | 5.37 | 1.26E-06 | 1.85E-05 | hypothetical protein                                                                 |
| TGME49_302055 | 4.99  | 4.56 | 1.28E-06 | 1.87E-05 | ribosomal protein RPS12                                                              |
| TGME49_259040 | -4.59 | 5.51 | 1.37E-06 | 1.99E-05 | hypothetical protein                                                                 |
| TGME49_314500 | 1.57  | 8.23 | 1.47E-06 | 2.12E-05 | subtilisin SUB2                                                                      |
| TGME49_295430 | 4.21  | 5.60 | 1.47E-06 | 2.12E-05 | hypothetical protein                                                                 |
| TGME49_250870 | 1.45  | 7.38 | 1.48E-06 | 2.13E-05 | DHHC zinc finger domain-containing protein                                           |
| TGME49_287515 | -7.54 | 4.51 | 1.50E-06 | 2.15E-05 | hypothetical protein                                                                 |
| TGME49_260430 | 2.73  | 5.07 | 1.52E-06 | 2.18E-05 | hypothetical protein                                                                 |
| TGME49_279350 | 2.72  | 6.32 | 1.61E-06 | 2.29E-05 | hypothetical protein                                                                 |
| TGME49_248850 | -7.96 | 5.00 | 1.61E-06 | 2.29E-05 | methionine aminopeptidase                                                            |
| TGME49_285700 | -7.81 | 4.81 | 1.66E-06 | 2.36E-05 | ubiquitin fusion degradation protein UFD1AP                                          |
| TGME49_253950 | 1.95  | 5.93 | 1.67E-06 | 2.36E-05 | protein fam50a, putative                                                             |
| TGME49_318440 | 1.36  | 7.85 | 1.68E-06 | 2.37E-05 | helicase associated domain (ha2) protein                                             |
| TGME49_200430 | -8.05 | 4.95 | 1.93E-06 | 2.70E-05 | cytidine and deoxycytidylate deaminase zinc-binding region domain-containing protein |
| TGME49_283702 | -9.11 | 5.97 | 2.09E-06 | 2.90E-05 | FATC domain-containing protein                                                       |
| TGME49_262080 | -5.29 | 5.33 | 2.24E-06 | 3.06E-05 | hypothetical protein                                                                 |
| TGME49_293000 | 1.59  | 7.26 | 2.33E-06 | 3.17E-05 | 3'5'-cyclic nucleotide phosphodiesterase domain-containing protein                   |
| TGME49_261480 | 1.43  | 6.59 | 2.39E-06 | 3.25E-05 | phosphatidyl serine synthase                                                         |
| TGME49_204360 | 2.15  | 6.27 | 2.44E-06 | 3.31E-05 | subtilisin SUB4                                                                      |
| TGME49_318170 | 1.49  | 6.30 | 2.44E-06 | 3.31E-05 | hypothetical protein                                                                 |
| TGME49_224620 | 1.86  | 6.17 | 2.52E-06 | 3.40E-05 | hypothetical protein                                                                 |

|               |       |       |          |           |                                                                |
|---------------|-------|-------|----------|-----------|----------------------------------------------------------------|
| TGME49_301170 | -7.88 | 5.29  | 2.54E-06 | 3.42E-05  | SAG-related sequence SRS19D                                    |
| TGME49_225550 | 1.23  | 7.56  | 2.59E-06 | 3.48E-05  | phosphatidylserine decarboxylase                               |
| TGME49_213460 | 1.67  | 7.26  | 2.60E-06 | 3.48E-05  | hypothetical protein                                           |
| TGME49_201710 | 2.12  | 5.86  | 2.66E-06 | 3.54E-05  | WD domain, G-beta repeat-containing protein                    |
| TGME49_291890 | 1.25  | 11.15 | 2.69E-06 | 3.56E-05  | microneme protein MIC1                                         |
| TGME49_253700 | 1.07  | 8.39  | 2.70E-06 | 3.56E-05  | transporter, major facilitator family protein                  |
| TGME49_252065 | 2.45  | 5.50  | 2.77E-06 | 3.65E-05  | KRUF family protein                                            |
| TGME49_278940 | 1.43  | 6.90  | 2.84E-06 | 3.72E-05  | HECT-domain (ubiquitin-transferase) domain-containing protein  |
| TGME49_209770 | -7.57 | 4.59  | 2.89E-06 | 3.77E-05  | helicase, putative                                             |
| TGME49_285950 | 2.05  | 5.44  | 2.89E-06 | 3.77E-05  | hypothetical protein                                           |
| TGME49_217160 | 2.74  | 5.01  | 2.92E-06 | 3.80E-05  | Der1 family protein                                            |
| TGME49_286010 | 2.32  | 6.14  | 3.31E-06 | 4.27E-05  | hypothetical protein                                           |
| TGME49_286050 | -5.13 | 5.45  | 3.44E-06 | 4.44E-05  | hypothetical protein                                           |
| TGME49_269010 | 1.22  | 9.39  | 3.47E-06 | 4.46E-05  | AP2 domain transcription factor AP2VIII-7                      |
| TGME49_248990 | 1.08  | 8.50  | 3.57E-06 | 4.58E-05  | hypothetical protein                                           |
| TGME49_217410 | 3.40  | 4.69  | 3.58E-06 | 4.58E-05  | hypothetical protein                                           |
| TGME49_253180 | 1.69  | 7.97  | 3.67E-06 | 4.68E-05  | hypothetical protein                                           |
| TGME49_232360 | 1.34  | 6.77  | 3.94E-06 | 5.00E-05  | exonuclease                                                    |
| TGME49_301400 | 1.23  | 9.68  | 4.44E-06 | 5.57E-05  | hypothetical protein                                           |
| TGME49_211330 | -7.65 | 4.51  | 4.51E-06 | 5.65E-05  | methionine aminopeptidase                                      |
| TGME49_205265 | 2.09  | 6.76  | 4.52E-06 | 5.66E-05  | transporter, cation channel family protein                     |
| TGME49_277490 | 1.20  | 7.52  | 4.78E-06 | 5.95E-05  | hypothetical protein                                           |
| TGME49_279100 | 1.47  | 9.31  | 4.86E-06 | 6.03E-05  | hypothetical protein                                           |
| TGME49_216140 | 1.52  | 7.81  | 4.87E-06 | 6.03E-05  | tetratricopeptide repeat-containing protein                    |
| TGME49_263190 | -7.51 | 4.66  | 4.90E-06 | 6.06E-05  | adenylosuccinate lyase, putative                               |
| TGME49_230820 | 1.29  | 7.86  | 5.07E-06 | 6.25E-05  | hypothetical protein                                           |
| TGME49_239748 | 1.71  | 6.03  | 5.17E-06 | 6.36E-05  | hypothetical protein                                           |
| TGME49_293650 | -7.56 | 4.86  | 5.21E-06 | 6.39E-05  | hypothetical protein                                           |
| TGME49_256840 | -5.74 | 5.72  | 5.23E-06 | 6.40E-05  | hypothetical protein                                           |
| TGME49_305990 | 2.30  | 5.91  | 5.28E-06 | 6.45E-05  | hypothetical protein                                           |
| TGME49_251770 | 1.56  | 7.36  | 5.67E-06 | 6.91E-05  | hypothetical protein                                           |
| TGME49_305930 | 2.59  | 5.05  | 5.68E-06 | 6.92E-05  | hypothetical protein                                           |
| TGME49_264220 | -8.48 | 5.18  | 5.70E-06 | 6.93E-05  | hypothetical protein                                           |
| TGME49_217790 | -7.49 | 4.58  | 5.93E-06 | 7.18E-05  | S1 RNA binding domain-containing protein                       |
| TGME49_310410 | -7.42 | 4.48  | 5.95E-06 | 7.18E-05  | WD domain, G-beta repeat-containing protein                    |
| TGME49_266480 | 3.02  | 4.64  | 6.03E-06 | 7.26E-05  | hypothetical protein                                           |
| TGME49_247030 | 1.13  | 9.66  | 6.13E-06 | 7.34E-05  | hypothetical protein                                           |
| TGME49_216810 | 1.48  | 7.97  | 7.32E-06 | 8.55E-05  | 5'-nucleotidase, C-terminal domain-containing protein          |
| TGME49_312600 | 1.16  | 8.45  | 7.41E-06 | 8.60E-05  | heat shock protein HSP21                                       |
| TGME49_254150 | 2.89  | 5.42  | 7.46E-06 | 8.65E-05  | hypothetical protein                                           |
| TGME49_202730 | -8.38 | 5.13  | 7.55E-06 | 8.72E-05  | hypothetical protein                                           |
| TGME49_319580 | -8.92 | 5.58  | 7.58E-06 | 8.74E-05  | hypothetical protein                                           |
| TGME49_255980 | 1.70  | 6.15  | 7.84E-06 | 9.03E-05  | hypothetical protein                                           |
| TGME49_213300 | -8.59 | 5.32  | 9.11E-06 | 0.0001037 | hypothetical protein                                           |
| TGME49_242870 | -8.59 | 5.43  | 9.17E-06 | 0.0001041 | histone lysine methyltransferase, SET, putative                |
| TGME49_270720 | -4.81 | 5.08  | 9.61E-06 | 0.0001086 | hypothetical protein                                           |
| TGME49_274130 | -5.04 | 5.18  | 9.65E-06 | 0.0001089 | TBC domain-containing protein                                  |
| TGME49_293900 | 1.41  | 8.24  | 1.08E-05 | 0.0001212 | sporozoite protein with an altered thrombospondin repeat SPATR |
| TGME49_211470 | 2.22  | 4.98  | 1.16E-05 | 0.0001294 | Fcf2 pre-rRNA processing protein                               |
| TGME49_301300 | -8.04 | 4.80  | 1.18E-05 | 0.0001312 | hypothetical protein                                           |

|               |       |      |          |           |                                                                     |
|---------------|-------|------|----------|-----------|---------------------------------------------------------------------|
| TGME49_291600 | 1.14  | 7.49 | 1.20E-05 | 0.0001324 | gamma interferon inducible lysosomal thiol reductase (GILT) protein |
| TGME49_272380 | 1.43  | 8.19 | 1.22E-05 | 0.0001348 | hypothetical protein                                                |
| TGME49_242670 | -7.47 | 4.42 | 1.24E-05 | 0.0001364 | hypothetical protein                                                |
| TGME49_207040 | -7.78 | 4.80 | 1.26E-05 | 0.0001385 | hypothetical protein                                                |
| TGME49_313340 | 1.38  | 7.45 | 1.28E-05 | 0.0001405 | hypothetical protein                                                |
| TGME49_236620 | 2.44  | 6.35 | 1.29E-05 | 0.0001409 | protein kinase (incomplete catalytic triad)                         |
| TGME49_262590 | -7.98 | 5.01 | 1.33E-05 | 0.0001449 | hypothetical protein                                                |
| TGME49_226060 | 1.62  | 7.34 | 1.33E-05 | 0.0001449 | transmembrane amino acid transporter protein                        |
| TGME49_273050 | 1.55  | 6.29 | 1.40E-05 | 0.0001504 | hypothetical protein                                                |
| TGME49_308590 | -5.00 | 5.97 | 1.41E-05 | 0.0001508 | Mov34/MPN/PAD-1 family protein                                      |
| TGME49_313418 | -4.53 | 5.51 | 1.43E-05 | 0.000153  | hypothetical protein                                                |
| TGME49_200590 | 1.85  | 5.61 | 1.44E-05 | 0.0001532 | Toxoplasma gondii family C protein                                  |
| TGME49_237130 | 2.07  | 9.60 | 1.44E-05 | 0.0001535 | cytochrome b, putative                                              |
| TGME49_273280 | -7.48 | 4.42 | 1.46E-05 | 0.000155  | hypothetical protein                                                |
| TGME49_269700 | 1.47  | 8.11 | 1.50E-05 | 0.0001581 | NLI interacting factor family phosphatase                           |
| TGME49_312380 | -8.23 | 4.91 | 1.50E-05 | 0.0001581 | tetratricopeptide repeat-containing protein                         |
| TGME49_297900 | 1.21  | 7.44 | 1.54E-05 | 0.000162  | hypothetical protein                                                |
| TGME49_213480 | 2.47  | 5.98 | 1.57E-05 | 0.0001643 | hypothetical protein                                                |
| TGME49_237530 | -8.47 | 5.19 | 1.63E-05 | 0.0001696 | hypothetical protein                                                |
| TGME49_200350 | 2.76  | 5.91 | 1.76E-05 | 0.0001822 | subtilisin SUB3                                                     |
| TGME49_254380 | 1.75  | 5.84 | 1.79E-05 | 0.0001846 | ribosomal protein L11, putative                                     |
| TGME49_202610 | 1.16  | 7.70 | 1.79E-05 | 0.0001846 | protein phosphatase 2C domain-containing protein                    |
| TGME49_240240 | -7.67 | 4.43 | 1.85E-05 | 0.0001902 | subtilisin SUB5                                                     |
| TGME49_255060 | 2.13  | 9.20 | 1.88E-05 | 0.0001928 | cytochrome b(N-terminal)/b6/petB subfamily protein                  |
| TGME49_309600 | 1.03  | 8.90 | 1.89E-05 | 0.0001932 | hypothetical protein                                                |
| TGME49_271840 | 1.74  | 4.82 | 1.91E-05 | 0.0001953 | hypothetical protein                                                |
| TGME49_320620 | -8.06 | 4.97 | 2.04E-05 | 0.0002061 | queuine tRNA ribosyl transferase                                    |
| TGME49_289620 | 1.53  | 8.81 | 2.06E-05 | 0.0002077 | cathepsin CPC1                                                      |
| TGME49_226260 | 1.49  | 7.48 | 2.11E-05 | 0.0002118 | hypothetical protein                                                |
| TGME49_255190 | 1.03  | 8.51 | 2.11E-05 | 0.0002118 | myosin C                                                            |
| TGME49_218850 | -7.60 | 4.54 | 2.12E-05 | 0.0002119 | ribosomal protein RPS9                                              |
| TGME49_277560 | -8.40 | 5.26 | 2.18E-05 | 0.0002173 | hypothetical protein                                                |
| TGME49_254555 | 1.57  | 6.66 | 2.29E-05 | 0.0002265 | histone lysine acetyltransferase GCN5-A                             |
| TGME49_225510 | 1.81  | 7.68 | 2.31E-05 | 0.0002283 | RAP domain-containing protein                                       |
| TGME49_229020 | -4.43 | 6.21 | 2.37E-05 | 0.0002331 | cell-cycle-associated protein kinase CDK, putative                  |
| TGME49_221490 | 1.51  | 5.89 | 2.39E-05 | 0.0002356 | cell cycle regulator protein                                        |
| TGME49_253960 | 1.91  | 5.45 | 2.43E-05 | 0.0002387 | oxidoreductase, short chain dehydrogenase/reductase family protein  |
| TGME49_260520 | 1.42  | 7.53 | 2.50E-05 | 0.0002444 | hypothetical protein                                                |
| TGME49_288800 | 1.99  | 6.45 | 2.55E-05 | 0.0002477 | endonuclease/exonuclease/phosphatase family protein                 |
| TGME49_222370 | 1.21  | 7.44 | 2.55E-05 | 0.000248  | SAG-related sequence SRS13                                          |
| TGME49_313160 | 1.41  | 6.19 | 2.66E-05 | 0.000257  | hypothetical protein                                                |
| TGME49_299980 | 1.35  | 7.50 | 2.82E-05 | 0.000271  | hypothetical protein                                                |
| TGME49_216335 | 2.42  | 5.09 | 2.89E-05 | 0.0002767 | hypothetical protein                                                |
| TGME49_288820 | 1.42  | 7.00 | 2.92E-05 | 0.0002787 | hypothetical protein                                                |
| TGME49_244540 | 1.33  | 6.72 | 3.00E-05 | 0.0002863 | mitochondrial carrier superfamily protein                           |
| TGME49_310310 | -8.00 | 4.89 | 3.01E-05 | 0.0002864 | WD domain, G-beta repeat-containing protein                         |
| TGME49_227780 | 1.87  | 5.75 | 3.13E-05 | 0.000297  | hypothetical protein                                                |

|               |       |       |          |           |                                                           |
|---------------|-------|-------|----------|-----------|-----------------------------------------------------------|
| TGME49_234670 | -7.39 | 4.64  | 3.15E-05 | 0.0002983 | actin-like family protein                                 |
| TGME49_299240 | 2.10  | 5.54  | 3.19E-05 | 0.0003012 | hypothetical protein                                      |
| TGME49_244510 | -7.66 | 4.44  | 3.21E-05 | 0.000303  | AP2 domain transcription factor AP2VI-3                   |
| TGME49_253570 | 1.62  | 5.91  | 3.27E-05 | 0.0003076 | hypothetical protein                                      |
| TGME49_225500 | 2.09  | 6.93  | 3.42E-05 | 0.0003194 | hypothetical protein                                      |
| TGME49_249698 | -8.06 | 4.89  | 3.48E-05 | 0.000325  | hypothetical protein                                      |
| TGME49_239290 | -8.14 | 4.88  | 3.54E-05 | 0.0003297 | hypothetical protein                                      |
| TGME49_240960 | 1.62  | 6.86  | 3.90E-05 | 0.0003564 | AIG2 family protein                                       |
| TGME49_275980 | 1.61  | 6.08  | 3.92E-05 | 0.0003581 | coenzyme q (ubiquinone) biosynthesis protein coq4 protein |
| TGME49_233220 | 1.34  | 7.41  | 4.02E-05 | 0.0003655 | hypothetical protein                                      |
| TGME49_259650 | -7.71 | 4.58  | 4.10E-05 | 0.0003716 | hypothetical protein                                      |
| TGME49_209820 | -5.09 | 5.26  | 4.10E-05 | 0.0003716 | syntaxin protein                                          |
| TGME49_206700 | -7.82 | 4.61  | 4.12E-05 | 0.0003722 | hypothetical protein                                      |
| TGME49_286740 | 3.34  | 5.35  | 4.12E-05 | 0.0003722 | microneme-like protein                                    |
| TGME49_263580 | 1.79  | 7.04  | 4.12E-05 | 0.0003722 | bromodomain-containing protein                            |
| TGME49_273310 | 1.47  | 6.76  | 4.20E-05 | 0.0003779 | hypothetical protein                                      |
| TGME49_205190 | 1.48  | 6.13  | 4.35E-05 | 0.0003909 | hypothetical protein                                      |
| TGME49_204130 | 1.11  | 9.58  | 4.48E-05 | 0.0004012 | perforin-like protein PLP1                                |
| TGME49_203050 | 1.89  | 6.32  | 4.57E-05 | 0.0004087 | AP2 domain transcription factor AP2VIIa-6                 |
| TGME49_313680 | 1.54  | 7.21  | 4.61E-05 | 0.0004112 | hypothetical protein                                      |
| TGME49_201390 | 1.21  | 10.94 | 4.70E-05 | 0.0004176 | hypothetical protein                                      |
| TGME49_223480 | -4.91 | 5.31  | 4.74E-05 | 0.0004205 | sushi domain (scr repeat) domain-containing protein       |
| TGME49_245428 | 2.44  | 5.32  | 4.91E-05 | 0.0004333 | hypothetical protein                                      |
| TGME49_265260 | 1.36  | 6.21  | 5.02E-05 | 0.0004418 | hypothetical protein                                      |
| TGME49_316220 | 2.34  | 4.59  | 5.15E-05 | 0.0004508 | mediator complex subunit MED6                             |
| TGME49_263390 | 1.87  | 5.79  | 5.16E-05 | 0.0004508 | hypothetical protein                                      |
| TGME49_313710 | -8.33 | 5.22  | 5.18E-05 | 0.0004524 | hypothetical protein                                      |
| TGME49_237550 | 2.55  | 6.05  | 5.26E-05 | 0.0004578 | hypothetical protein                                      |
| TGME49_285710 | 1.53  | 6.33  | 5.29E-05 | 0.0004599 | hypothetical protein                                      |
| TGME49_208550 | 1.25  | 6.92  | 5.32E-05 | 0.000461  | hypothetical protein                                      |
| TGME49_233830 | -7.61 | 4.39  | 5.50E-05 | 0.0004747 | hypothetical protein                                      |
| TGME49_260150 | -7.18 | 4.60  | 5.58E-05 | 0.0004797 | tetratricopeptide repeat-containing protein               |
| TGME49_231800 | -8.11 | 4.94  | 5.77E-05 | 0.0004945 | helicase, putative                                        |
| TGME49_269420 | 1.56  | 7.56  | 5.94E-05 | 0.0005049 | hypothetical protein                                      |
| TGME49_262900 | -7.84 | 4.67  | 6.06E-05 | 0.0005141 | hypothetical protein                                      |
| TGME49_207980 | -4.42 | 4.52  | 6.06E-05 | 0.0005141 | PIG-P protein                                             |
| TGME49_253600 | 1.73  | 6.69  | 6.21E-05 | 0.000524  | hypothetical protein                                      |
| TGME49_249680 | 1.66  | 6.46  | 6.33E-05 | 0.0005314 | RNA polymerase II associated Paf1 complex component PAF1  |
| TGME49_212735 | -7.90 | 4.76  | 6.33E-05 | 0.0005314 | hypothetical protein                                      |
| TGME49_217692 | -7.66 | 4.48  | 6.66E-05 | 0.0005563 | hypothetical protein                                      |
| TGME49_253940 | 1.35  | 7.11  | 6.72E-05 | 0.0005601 | CAM Kinase family, incomplete catalytic triad             |
| TGME49_221190 | 2.14  | 5.56  | 6.74E-05 | 0.0005606 | mRNA cleavage factor family protein, putative             |
| TGME49_257700 | -7.24 | 4.46  | 6.74E-05 | 0.0005606 | hypothetical protein                                      |
| TGME49_218720 | 1.45  | 7.06  | 6.96E-05 | 0.0005756 | calcium-dependent protein kinase CDPK6                    |
| TGME49_249840 | -5.06 | 5.01  | 7.17E-05 | 0.0005917 | dynein heavy chain 2, putative                            |
| TGME49_318610 | 2.42  | 4.83  | 7.39E-05 | 0.0006067 | AP2 domain transcription factor AP2IV-3                   |
| TGME49_235360 | 2.14  | 4.74  | 7.50E-05 | 0.0006153 | hypothetical protein                                      |
| TGME49_267775 | -7.80 | 4.74  | 7.85E-05 | 0.0006401 | hypothetical protein                                      |
| TGME49_233540 | -7.86 | 4.91  | 7.96E-05 | 0.0006485 | transporter, major facilitator family protein             |
| TGME49_291590 | -7.62 | 4.47  | 8.22E-05 | 0.000668  | hypothetical protein                                      |

|               |       |      |           |           |                                                                       |
|---------------|-------|------|-----------|-----------|-----------------------------------------------------------------------|
| TGME49_286240 | 1.06  | 7.19 | 8.25E-05  | 0.0006691 | kelch repeat protein, putative                                        |
| TGME49_266930 | 1.65  | 5.61 | 8.26E-05  | 0.0006691 | general transcription factor IIH polypeptide 3<br>GTF2H3              |
| TGME49_236870 | 1.67  | 7.34 | 8.33E-05  | 0.0006743 | hypothetical protein                                                  |
| TGME49_234230 | 1.02  | 7.55 | 8.46E-05  | 0.0006829 | hypothetical protein                                                  |
| TGME49_225490 | 1.09  | 8.16 | 8.50E-05  | 0.000685  | calcium-dependent protein kinase CDPK2                                |
| TGME49_280410 | 1.07  | 6.95 | 8.60E-05  | 0.0006924 | 3'5'-cyclic nucleotide phosphodiesterase<br>domain-containing protein |
| TGME49_258100 | -4.59 | 4.61 | 8.66E-05  | 0.0006958 | TPR repeat region protein                                             |
| TGME49_276210 | 1.11  | 7.27 | 8.76E-05  | 0.0007021 | phosphoglycerate mutase family protein                                |
| TGME49_253100 | 1.01  | 7.65 | 8.82E-05  | 0.0007058 | hypothetical protein                                                  |
| TGME49_234510 | 1.21  | 6.86 | 9.38E-05  | 0.0007466 | ankyrin repeat-containing protein                                     |
| TGME49_294690 | 1.18  | 7.36 | 9.59E-05  | 0.0007604 | rhomboid protease ROM5                                                |
| TGME49_285480 | -8.25 | 5.22 | 9.79E-05  | 0.0007752 | hypothetical protein                                                  |
| TGME49_227560 | 1.20  | 7.06 | 9.83E-05  | 0.0007773 | IWS1 transcription factor, putative                                   |
| TGME49_234980 | 1.44  | 6.46 | 0.0001014 | 0.0007999 | hypothetical protein                                                  |
| TGME49_255330 | -7.85 | 4.78 | 0.000102  | 0.0008037 | hypothetical protein                                                  |
| TGME49_285170 | -7.62 | 4.38 | 0.0001023 | 0.0008051 | methyltransferase small, putative                                     |
| TGME49_232760 | 1.40  | 6.54 | 0.0001029 | 0.0008086 | protein phosphatase inhibitor IPP2                                    |
| TGME49_232630 | 1.30  | 8.59 | 0.0001052 | 0.0008251 | hypothetical protein                                                  |
| TGME49_216700 | -7.82 | 4.74 | 0.0001072 | 0.000838  | hypothetical protein                                                  |
| TGME49_314250 | 2.39  | 5.27 | 0.00011   | 0.0008563 | bradyzoite rhostry protein BRP1                                       |
| TGME49_283550 | 1.35  | 7.29 | 0.0001143 | 0.0008861 | hypothetical protein                                                  |
| TGME49_267580 | 1.35  | 7.15 | 0.0001154 | 0.000893  | cyclin2 related protein                                               |
| TGME49_203160 | 1.65  | 6.12 | 0.000116  | 0.0008972 | hypothetical protein                                                  |
| TGME49_263490 | 1.53  | 5.63 | 0.0001176 | 0.0009073 | ubiquitin conjugating enzyme E2, putative                             |
| TGME49_293780 | 1.32  | 7.63 | 0.0001223 | 0.0009374 | hypothetical protein                                                  |
| TGME49_299250 | 1.58  | 5.86 | 0.0001274 | 0.0009701 | hypothetical protein                                                  |
| TGME49_261075 | -6.85 | 4.62 | 0.0001279 | 0.000973  | hypothetical protein                                                  |
| TGME49_306510 | 2.48  | 4.93 | 0.0001283 | 0.0009751 | hypothetical protein                                                  |
| TGME49_234460 | 1.30  | 6.92 | 0.0001318 | 0.0009958 | hypothetical protein                                                  |
| TGME49_254770 | 1.13  | 6.69 | 0.0001338 | 0.0010093 | Ser/Thr phosphatase family protein                                    |
| TGME49_297647 | 2.86  | 4.83 | 0.0001367 | 0.0010251 | hypothetical protein                                                  |
| TGME49_237425 | -7.81 | 4.65 | 0.0001368 | 0.0010251 | AP2 domain transcription factor AP2X-6                                |
| TGME49_207665 | -7.87 | 4.57 | 0.0001447 | 0.001076  | kinesin motor domain-containing protein                               |
| TGME49_205110 | -7.19 | 4.59 | 0.000151  | 0.0011191 | hypothetical protein                                                  |
| TGME49_246120 | 1.67  | 5.90 | 0.0001523 | 0.0011275 | tetratricopeptide repeat-containing protein                           |
| TGME49_245432 | 1.31  | 7.40 | 0.0001524 | 0.0011275 | hypothetical protein                                                  |
| TGME49_268560 | 1.44  | 5.68 | 0.0001527 | 0.0011288 | XPG N-terminal domain-containing protein                              |
| TGME49_311450 | 2.53  | 4.54 | 0.0001548 | 0.0011411 | zinc finger, c2h2 type domain-containing<br>protein                   |
| TGME49_268000 | -5.04 | 5.01 | 0.0001649 | 0.0012098 | hypothetical protein                                                  |
| TGME49_305950 | 1.45  | 5.97 | 0.000166  | 0.0012155 | tetratricopeptide repeat-containing protein                           |
| TGME49_265170 | -7.58 | 4.53 | 0.0001675 | 0.0012239 | hypothetical protein                                                  |
| TGME49_220510 | 1.70  | 6.25 | 0.0001763 | 0.0012802 | hypothetical protein                                                  |
| TGME49_246990 | 1.66  | 6.02 | 0.0001774 | 0.0012841 | hypothetical protein                                                  |
| TGME49_310560 | -8.01 | 5.05 | 0.0001799 | 0.0012998 | hypothetical protein                                                  |
| TGME49_297770 | 1.71  | 4.87 | 0.000181  | 0.0013069 | hypothetical protein                                                  |
| TGME49_206540 | 1.44  | 7.28 | 0.000182  | 0.001311  | hypothetical protein                                                  |
| TGME49_236140 | -7.22 | 4.58 | 0.000194  | 0.0013871 | hypothetical protein                                                  |
| TGME49_279330 | 1.71  | 5.84 | 0.0002    | 0.0014193 | DEAD/DEAH box helicase family protein                                 |
| TGME49_254730 | 1.58  | 5.56 | 0.0002009 | 0.0014238 | POPLD (NUC188) domain-containing protein                              |
| TGME49_319360 | 3.27  | 4.58 | 0.0002013 | 0.0014254 | SAG-related sequence SRS17A                                           |

|               |       |      |           |           |                                                                    |
|---------------|-------|------|-----------|-----------|--------------------------------------------------------------------|
| TGME49_319720 | -7.63 | 4.59 | 0.000211  | 0.0014858 | hypothetical protein                                               |
| TGME49_243510 | -7.90 | 4.80 | 0.0002129 | 0.0014952 | OTU family cysteine protease                                       |
| TGME49_226850 | 1.87  | 6.27 | 0.0002228 | 0.0015515 | TBC domain-containing protein                                      |
| TGME49_298830 | 1.92  | 5.82 | 0.0002321 | 0.0016049 | hypothetical protein                                               |
| TGME49_271800 | 1.81  | 6.45 | 0.0002379 | 0.0016434 | serine esterase (DUF676) protein                                   |
| TGME49_264120 | -4.57 | 4.61 | 0.0002383 | 0.0016452 | Myb family DNA-binding domain-containing protein                   |
| TGME49_320680 | 2.33  | 4.71 | 0.0002414 | 0.0016575 | AP2 domain transcription factor AP2IV-2                            |
| TGME49_207900 | 1.26  | 6.53 | 0.0002483 | 0.0017003 | transcription initiation factor TFIIB                              |
| TGME49_270580 | 1.61  | 5.35 | 0.0002519 | 0.0017231 | HECT-domain (ubiquitin-transferase) domain-containing protein      |
| TGME49_266740 | 1.97  | 5.45 | 0.0002587 | 0.0017634 | RNA recognition motif-containing protein                           |
| TGME49_239810 | 1.52  | 6.36 | 0.0002634 | 0.0017923 | hypothetical protein                                               |
| TGME49_253490 | 1.36  | 7.30 | 0.0002664 | 0.0018081 | hypothetical protein                                               |
| TGME49_255245 | -7.67 | 4.59 | 0.0002729 | 0.0018473 | hypothetical protein                                               |
| TGME49_230170 | 1.28  | 7.44 | 0.0002734 | 0.001848  | hypothetical protein                                               |
| TGME49_311280 | -7.88 | 4.64 | 0.0002735 | 0.001848  | hypothetical protein                                               |
| TGME49_288860 | 2.12  | 7.04 | 0.000277  | 0.0018705 | RuvB family 2 protein                                              |
| TGME49_239910 | 1.52  | 6.52 | 0.0002868 | 0.0019315 | cyclin-dependent kinase                                            |
| TGME49_231215 | -7.74 | 4.69 | 0.0002926 | 0.0019669 | hypothetical protein                                               |
| TGME49_292055 | 1.65  | 6.01 | 0.0002934 | 0.0019693 | calcium dependent protein kinase CDPK8                             |
| TGME49_226100 | -7.32 | 5.21 | 0.0002934 | 0.0019693 | haloacid dehalogenase family hydrolase domain-containing protein   |
| TGME49_310500 | 1.41  | 6.50 | 0.0002938 | 0.00197   | hypothetical protein                                               |
| TGME49_237020 | 1.45  | 6.35 | 0.0003042 | 0.002036  | exonuclease                                                        |
| TGME49_205540 | 1.35  | 6.25 | 0.0003117 | 0.0020754 | DEAD/DEAH box helicase domain-containing protein                   |
| TGME49_296121 | 1.29  | 7.39 | 0.0003138 | 0.0020874 | hypothetical protein                                               |
| TGME49_293480 | 1.64  | 7.25 | 0.0003297 | 0.002186  | MoeA N-terminal region (domain I and II) domain-containing protein |
| TGME49_213060 | 1.35  | 6.07 | 0.0003324 | 0.002198  | WD domain, G-beta repeat-containing protein                        |
| TGME49_254720 | 1.31  | 9.48 | 0.0003356 | 0.0022178 | dense granule protein GRA8                                         |
| TGME49_219230 | 1.39  | 6.18 | 0.0003382 | 0.0022328 | AMP-binding enzyme domain-containing protein                       |
| TGME49_280700 | 1.29  | 7.39 | 0.0003547 | 0.0023257 | arginine decarboxylase                                             |
| TGME49_214580 | -7.26 | 4.92 | 0.0003677 | 0.0024029 | tetratricopeptide repeat-containing protein                        |
| TGME49_289140 | 1.28  | 6.57 | 0.0003793 | 0.002466  | ribosomal protein l22/l43, putative                                |
| TGME49_219630 | 1.02  | 6.96 | 0.0004235 | 0.0027168 | flavodoxin domain-containing protein                               |
| TGME49_278250 | -4.60 | 4.88 | 0.0004356 | 0.0027833 | hypothetical protein                                               |
| TGME49_257370 | 1.68  | 5.81 | 0.000451  | 0.0028652 | hypothetical protein                                               |
| TGME49_295960 | 1.20  | 7.08 | 0.0004597 | 0.0029108 | hypothetical protein                                               |
| TGME49_278720 | 1.34  | 5.96 | 0.0004651 | 0.0029355 | hypothetical protein                                               |
| TGME49_224270 | 1.17  | 6.50 | 0.000479  | 0.0030157 | hypothetical protein                                               |
| TGME49_284590 | 1.95  | 4.79 | 0.0004797 | 0.0030176 | hypothetical protein                                               |
| TGME49_267670 | 2.48  | 5.25 | 0.0004851 | 0.0030468 | hypothetical protein                                               |
| TGME49_245980 | 2.03  | 6.49 | 0.0004929 | 0.0030899 | hypothetical protein                                               |
| TGME49_275310 | 1.30  | 6.47 | 0.0005006 | 0.0031312 | hypothetical protein                                               |
| TGME49_250090 | 1.35  | 6.21 | 0.0005286 | 0.003293  | hypothetical protein                                               |
| TGME49_210360 | 1.42  | 6.33 | 0.0005334 | 0.0033173 | DEAD (Asp-Glu-Ala-Asp) box polypeptide 41 family protein           |
| TGME49_226560 | 1.30  | 5.98 | 0.0005368 | 0.0033281 | zinc finger (CCCH type) motif-containing protein                   |
| TGME49_262480 | 1.43  | 6.65 | 0.0005425 | 0.0033609 | dynein light chain roadblock-type 2, putative                      |

|               |       |      |           |           |                                                                  |
|---------------|-------|------|-----------|-----------|------------------------------------------------------------------|
| TGME49_229390 | 2.31  | 4.60 | 0.0005596 | 0.0034473 | hypothetical protein                                             |
| TGME49_268650 | 2.31  | 4.85 | 0.0005611 | 0.0034538 | chaperone clpB protein, putative                                 |
| TGME49_287430 | 2.69  | 4.52 | 0.0006203 | 0.0037758 | hypothetical protein                                             |
| TGME49_242270 | 1.05  | 6.42 | 0.000631  | 0.003835  | hypothetical protein                                             |
| TGME49_284598 | -7.76 | 5.11 | 0.0006433 | 0.0039067 | haloacid dehalogenase family hydrolase domain-containing protein |
| TGME49_312210 | 1.46  | 5.61 | 0.0006502 | 0.0039419 | hypothetical protein                                             |
| TGME49_268730 | 1.55  | 5.79 | 0.0006506 | 0.0039419 | glutaredoxin-related protein                                     |
| TGME49_224470 | 1.33  | 6.33 | 0.0006626 | 0.0039987 | hypothetical protein                                             |
| TGME49_225290 | 1.57  | 6.51 | 0.0006781 | 0.0040702 | GDA1/CD39 (nucleoside phosphatase) family protein                |
| TGME49_273660 | 1.35  | 7.35 | 0.0006844 | 0.0041046 | AP2 domain transcription factor AP2VIII-3                        |
| TGME49_305120 | 1.08  | 7.25 | 0.0006856 | 0.0041086 | transporter, solute:sodium symporter (SSS) family protein        |
| TGME49_266890 | 1.37  | 7.32 | 0.0006963 | 0.0041571 | hypothetical protein                                             |
| TGME49_269200 | 1.72  | 5.82 | 0.0007085 | 0.0042132 | crooked neck family 1 protein isoform 2, putative                |
| TGME49_309990 | 2.15  | 6.26 | 0.0007109 | 0.0042181 | hypothetical protein                                             |
| TGME49_220880 | 2.09  | 6.09 | 0.0007208 | 0.0042666 | hypothetical protein                                             |
| TGME49_271600 | 2.44  | 4.53 | 0.0007244 | 0.0042801 | hypothetical protein                                             |
| TGME49_248450 | 1.14  | 6.38 | 0.0007251 | 0.0042801 | zinc finger, C3HC4 type (RING finger) domain-containing protein  |
| TGME49_267370 | 1.09  | 7.19 | 0.0007264 | 0.0042838 | kinesin motor domain-containing protein                          |
| TGME49_220870 | 2.20  | 5.94 | 0.0007404 | 0.0043528 | hypothetical protein                                             |
| TGME49_216800 | 2.07  | 5.04 | 0.0007473 | 0.0043827 | flagellar/basal body protein                                     |
| TGME49_258010 | 1.27  | 5.82 | 0.0007506 | 0.0043963 | calcium signaling protein kinase RAD53, putative                 |
| TGME49_202568 | 1.57  | 5.12 | 0.0007655 | 0.0044632 | hypothetical protein                                             |
| TGME49_257560 | 2.08  | 4.98 | 0.000769  | 0.0044802 | WD domain, G-beta repeat-containing protein                      |
| TGME49_247340 | 2.52  | 5.26 | 0.0007743 | 0.0045009 | hypothetical protein                                             |
| TGME49_258458 | 1.76  | 6.62 | 0.0007771 | 0.00451   | hypothetical protein                                             |
| TGME49_236790 | -4.71 | 4.76 | 0.000781  | 0.0045291 | hypothetical protein                                             |
| TGME49_270800 | 1.45  | 6.28 | 0.0007815 | 0.0045291 | GAF domain-containing protein                                    |
| TGME49_220360 | 1.16  | 6.41 | 0.0008119 | 0.0046782 | FAD binding domain-containing protein                            |
| TGME49_315310 | 1.22  | 6.45 | 0.0008121 | 0.0046782 | hypothetical protein                                             |
| TGME49_254220 | 1.88  | 5.43 | 0.000826  | 0.0047511 | hypothetical protein                                             |
| TGME49_280375 | 2.39  | 6.55 | 0.0008464 | 0.0048472 | hypothetical protein                                             |
| TGME49_202620 | 1.53  | 8.40 | 0.000849  | 0.0048582 | hypothetical protein                                             |
| TGME49_216770 | 1.52  | 6.79 | 0.0008628 | 0.0049191 | hypothetical protein                                             |
| TGME49_218910 | 2.44  | 5.59 | 0.0008691 | 0.0049515 | hypothetical protein                                             |
| TGME49_220470 | 1.08  | 7.20 | 0.0008958 | 0.0050758 | hypothetical protein                                             |
| TGME49_300020 | 1.17  | 6.17 | 0.0008962 | 0.0050758 | ATP-dependent metallopeptidase HflB subfamily protein            |
| TGME49_278030 | 1.03  | 7.66 | 0.0008997 | 0.0050884 | hypothetical protein                                             |
| TGME49_206460 | 1.47  | 6.32 | 0.0009063 | 0.0051145 | hypothetical protein                                             |
| TGME49_255250 | -4.38 | 5.30 | 0.0009313 | 0.0052304 | tRNA (cytosine(34)-C(5))-methyltransferase, putative             |
| TGME49_251840 | 1.61  | 6.41 | 0.0009318 | 0.0052304 | hypothetical protein                                             |
| TGME49_306630 | 1.78  | 4.95 | 0.0009338 | 0.0052352 | tRNA methyltransferase complex GCD14 subunit protein             |
| TGME49_246610 | 1.41  | 5.44 | 0.0009473 | 0.0052952 | hypothetical protein                                             |
| TGME49_282140 | 1.32  | 6.74 | 0.0009524 | 0.0053203 | cwf21 protein                                                    |
| TGME49_300052 | 1.91  | 5.47 | 0.0009744 | 0.0054273 | hypothetical protein                                             |

|               |       |      |           |           |                                                                        |
|---------------|-------|------|-----------|-----------|------------------------------------------------------------------------|
| TGME49_234350 | 2.21  | 5.05 | 0.0010008 | 0.0055463 | hypothetical protein                                                   |
| TGME49_281440 | 1.10  | 7.93 | 0.0010033 | 0.0055533 | hypothetical protein                                                   |
| TGME49_222070 | 1.30  | 5.57 | 0.0010049 | 0.0055533 | elongation factor Tu GTP binding domain-containing protein             |
| TGME49_233080 | 1.43  | 6.01 | 0.0010267 | 0.0056617 | G-patch domain-containing protein                                      |
| TGME49_202025 | 2.35  | 4.49 | 0.0010454 | 0.0057463 | hypothetical protein                                                   |
| TGME49_269075 | 1.55  | 5.28 | 0.00105   | 0.005757  | hypothetical protein                                                   |
| TGME49_232590 | 1.35  | 6.37 | 0.0010641 | 0.0058304 | glutamate-cysteine ligase, catalytic subunit domain-containing protein |
| TGME49_288670 | 1.87  | 5.27 | 0.0010771 | 0.005885  | hypothetical protein                                                   |
| TGME49_275750 | 1.05  | 7.30 | 0.001086  | 0.0059294 | small nuclear ribonucleoprotein E, putative                            |
| TGME49_300990 | 1.63  | 5.19 | 0.0010941 | 0.0059567 | Toxoplasma gondii family C protein                                     |
| TGME49_257755 | -7.01 | 4.73 | 0.0011529 | 0.006207  | hypothetical protein                                                   |
| TGME49_320640 | 1.36  | 6.35 | 0.0011582 | 0.0062224 | peptidylprolyl isomerase domain-containing protein                     |
| TGME49_248660 | 1.27  | 5.66 | 0.0011606 | 0.006229  | hypothetical protein                                                   |
| TGME49_236000 | 1.45  | 5.40 | 0.001168  | 0.0062558 | ferredoxin, putative                                                   |
| TGME49_208540 | 1.44  | 5.77 | 0.0011868 | 0.0063276 | DEAD/DEAH box helicase domain-containing protein                       |
| TGME49_299000 | 1.23  | 6.72 | 0.0011955 | 0.0063699 | hypothetical protein                                                   |
| TGME49_246010 | 2.01  | 5.36 | 0.001205  | 0.006416  | hypothetical protein                                                   |
| TGME49_224160 | -4.81 | 4.96 | 0.0012116 | 0.0064467 | hypothetical protein                                                   |
| TGME49_289170 | -6.97 | 4.56 | 0.0012358 | 0.0065581 | adenylate and guanylate cyclase catalytic domain-containing protein    |
| TGME49_221220 | 2.00  | 5.26 | 0.0012437 | 0.0065903 | hypothetical protein                                                   |
| TGME49_273500 | -4.79 | 4.94 | 0.0012635 | 0.0066677 | O-linked N-acetylglucosamine transferase                               |
| TGME49_313495 | -4.77 | 4.87 | 0.0013052 | 0.0068716 | hypothetical protein                                                   |
| TGME49_217610 | 2.23  | 5.48 | 0.0013137 | 0.006895  | hypothetical protein                                                   |
| TGME49_217640 | 2.05  | 6.33 | 0.0013167 | 0.0069011 | hypothetical protein                                                   |
| TGME49_293580 | 1.03  | 7.41 | 0.0013315 | 0.0069517 | prefoldin subunit protein                                              |
| TGME49_269705 | 2.45  | 4.71 | 0.0013342 | 0.0069588 | hypothetical protein                                                   |
| TGME49_281910 | 2.08  | 6.17 | 0.0013526 | 0.0070272 | hypothetical protein                                                   |
| TGME49_245730 | 1.83  | 5.77 | 0.001356  | 0.0070356 | phosphatidylinositol-4-phosphate 5-Kinase                              |
| TGME49_305090 | 1.14  | 6.45 | 0.0013838 | 0.0071605 | kinase binding protein cgi-121 protein                                 |
| TGME49_232640 | 1.51  | 5.52 | 0.0013884 | 0.0071798 | RNA 2'-phosphotransferase, Tpt1/KptA family protein                    |
| TGME49_211695 | 1.87  | 4.79 | 0.0014198 | 0.007314  | hypothetical protein                                                   |
| TGME49_217010 | 1.28  | 6.35 | 0.0014219 | 0.0073187 | hypothetical protein                                                   |
| TGME49_258720 | 1.45  | 6.16 | 0.001457  | 0.0074597 | Ubiquitin family protein, putative                                     |
| TGME49_262060 | 1.09  | 6.26 | 0.0014599 | 0.0074672 | hypothetical protein                                                   |
| TGME49_268320 | 1.47  | 6.18 | 0.0015344 | 0.0077942 | hypothetical protein                                                   |
| TGME49_306520 | 1.18  | 7.07 | 0.0015424 | 0.0078175 | tRNA pseudouridine synthase B, putative                                |
| TGME49_252510 | 2.06  | 6.03 | 0.001549  | 0.0078422 | hypothetical protein                                                   |
| TGME49_262970 | 1.30  | 7.43 | 0.0015598 | 0.0078797 | hypothetical protein                                                   |
| TGME49_219250 | 1.11  | 7.27 | 0.0015604 | 0.0078797 | acetyltransferase, GNAT family protein                                 |
| TGME49_313060 | 1.11  | 6.71 | 0.0015857 | 0.0079863 | eukaryotic translation initiation factor 2B, putative                  |
| TGME49_314070 | 1.15  | 6.34 | 0.0016108 | 0.0080919 | hypothetical protein                                                   |
| TGME49_255270 | 1.99  | 5.09 | 0.0016658 | 0.0083381 | hypothetical protein                                                   |
| TGME49_206500 | 1.65  | 5.25 | 0.0017224 | 0.0085633 | hypothetical protein                                                   |
| TGME49_271320 | 1.92  | 4.81 | 0.0017953 | 0.0088574 | hypothetical protein                                                   |
| TGME49_212090 | 1.04  | 6.73 | 0.0018001 | 0.0088584 | hypothetical protein                                                   |
| TGME49_294750 | 1.67  | 5.16 | 0.0018479 | 0.0090646 | hypothetical protein                                                   |



|               |       |       |           |           |                                                                              |
|---------------|-------|-------|-----------|-----------|------------------------------------------------------------------------------|
| TGME49_228780 | 2.19  | 5.54  | 0.0018801 | 0.0091996 | Toxoplasma gondii family C protein                                           |
| TGME49_202780 | 1.14  | 7.63  | 0.0019136 | 0.0093222 | rhoptry kinase family protein ROP25                                          |
| TGME49_222245 | 1.30  | 6.79  | 0.0019395 | 0.0094302 | hypothetical protein                                                         |
| TGME49_277150 | -4.49 | 5.20  | 0.0019806 | 0.009594  | XPG N-terminal domain-containing protein                                     |
| TGME49_232955 | -5.63 | 10.84 | 0.0020171 | 0.0097282 | hypothetical protein                                                         |
| TGME49_217510 | 1.08  | 8.80  | 0.0020573 | 0.0098961 | hypothetical protein                                                         |
| TGME49_313360 | 1.22  | 6.29  | 0.0020583 | 0.0098961 | hypothetical protein                                                         |
| TGME49_234490 | 1.13  | 6.17  | 0.0021327 | 0.0101776 | kelch repeat-containing protein                                              |
| TGME49_202510 | -4.48 | 5.80  | 0.0022035 | 0.010451  | multi-pass transmembrane protein                                             |
| TGME49_219240 | 1.70  | 5.69  | 0.0022309 | 0.0105679 | Peptidyl-tRNA hydrolase PTH2 domain-containing protein                       |
| TGME49_229500 | 1.44  | 6.14  | 0.0022366 | 0.0105823 | hypothetical protein                                                         |
| TGME49_259830 | 2.00  | 6.41  | 0.0023268 | 0.0109286 | diacylglycerol kinase catalytic domain-containing protein                    |
| TGME49_266940 | 1.89  | 6.11  | 0.002385  | 0.0111275 | DHHC zinc finger domain-containing protein                                   |
| TGME49_202450 | 1.98  | 5.35  | 0.0025222 | 0.0116459 | hypothetical protein                                                         |
| TGME49_300320 | -4.56 | 4.45  | 0.002549  | 0.0117368 | dimethyladenosine transferase                                                |
| TGME49_215440 | 1.26  | 6.52  | 0.0026367 | 0.0120902 | WWE domain-containing protein                                                |
| TGME49_313110 | 1.21  | 5.91  | 0.002663  | 0.0121835 | hypothetical protein                                                         |
| TGME49_264650 | -4.36 | 4.67  | 0.0026859 | 0.012265  | phosphoacetylglucosamine mutase                                              |
| TGME49_204320 | 1.43  | 5.13  | 0.0027171 | 0.0123856 | hypothetical protein                                                         |
| TGME49_211480 | 1.96  | 5.52  | 0.002738  | 0.0124588 | GTP-binding protein engA, putative                                           |
| TGME49_264030 | 1.02  | 6.90  | 0.0028328 | 0.0127996 | aminotransferase, putative                                                   |
| TGME49_208570 | 1.07  | 7.57  | 0.002848  | 0.0128461 | ubiquitin conjugating enzyme E2, putative                                    |
| TGME49_231020 | 1.12  | 5.82  | 0.0028915 | 0.0130263 | hypothetical protein                                                         |
| TGME49_215540 | -6.53 | 4.49  | 0.0029155 | 0.0130741 | hypothetical protein                                                         |
| TGME49_295950 | 1.53  | 6.39  | 0.0029623 | 0.0132534 | KRUF family protein                                                          |
| TGME49_262680 | 1.70  | 4.41  | 0.00305   | 0.013575  | hypothetical protein                                                         |
| TGME49_224990 | 1.10  | 5.97  | 0.0031031 | 0.0137795 | hypothetical protein                                                         |
| TGME49_299780 | 1.20  | 8.77  | 0.0031105 | 0.0137906 | hypothetical protein                                                         |
| TGME49_275755 | 1.65  | 5.48  | 0.003111  | 0.0137906 | hypothetical protein                                                         |
| TGME49_248540 | -6.69 | 4.43  | 0.0031971 | 0.0141239 | hypothetical protein                                                         |
| TGME49_239795 | 1.67  | 6.48  | 0.0032041 | 0.0141423 | hypothetical protein                                                         |
| TGME49_271935 | 1.78  | 6.58  | 0.0033199 | 0.0145663 | hypothetical protein                                                         |
| TGME49_209680 | 1.27  | 5.58  | 0.0033451 | 0.0146606 | hypothetical protein                                                         |
| TGME49_318880 | 1.99  | 4.84  | 0.0033684 | 0.0147457 | hypothetical protein                                                         |
| TGME49_246160 | 2.07  | 4.55  | 0.003472  | 0.0151564 | hypothetical protein                                                         |
| TGME49_241175 | 1.49  | 4.72  | 0.0035521 | 0.0154409 | hypothetical protein                                                         |
| TGME49_316360 | 1.18  | 6.01  | 0.0035787 | 0.0155169 | hypothetical protein                                                         |
| TGME49_209490 | 1.16  | 6.16  | 0.0037049 | 0.0159658 | hypothetical protein                                                         |
| TGME49_270805 | 2.37  | 4.88  | 0.0037259 | 0.0160472 | hypothetical protein                                                         |
| TGME49_213020 | 1.82  | 5.47  | 0.0038899 | 0.0166422 | hypothetical protein                                                         |
| TGME49_260220 | 1.24  | 7.04  | 0.0039053 | 0.0166988 | folate/biopterin transporter subfamily protein                               |
| TGME49_295020 | 1.62  | 4.83  | 0.0040456 | 0.0172325 | Sterol-sensing domain of SREBP cleavage-activation domain-containing protein |
| TGME49_248830 | 1.03  | 6.65  | 0.0040634 | 0.0172985 | phosphoinositide phospholipase PIPLC                                         |
| TGME49_258850 | 1.86  | 5.34  | 0.0040876 | 0.0173676 | hypothetical protein                                                         |
| TGME49_262600 | 1.54  | 4.89  | 0.0041972 | 0.0177509 | hypothetical protein                                                         |
| TGME49_264730 | 1.12  | 5.74  | 0.0042381 | 0.0179043 | hypothetical protein                                                         |
| TGME49_260470 | 1.02  | 7.48  | 0.0043474 | 0.018296  | heat shock protein DNAJ pfj4, putative                                       |
| TGME49_222940 | 2.36  | 5.20  | 0.0046175 | 0.0192336 | hypothetical protein                                                         |
| TGME49_221640 | 1.26  | 6.76  | 0.0047685 | 0.0197353 | hypothetical protein                                                         |
| TGME49_224090 | 1.20  | 6.19  | 0.0049045 | 0.0202007 | enoyl-CoA hydratase/isomerase family protein                                 |

|               |       |      |           |           |                                                                                      |
|---------------|-------|------|-----------|-----------|--------------------------------------------------------------------------------------|
| TGME49_316200 | 1.35  | 6.57 | 0.0049399 | 0.0203103 | phosphoglycerate mutase family protein                                               |
| TGME49_215380 | 1.43  | 5.48 | 0.004961  | 0.0203791 | hypothetical protein                                                                 |
| TGME49_282170 | 1.24  | 7.12 | 0.0049955 | 0.0204882 | hypothetical protein                                                                 |
| TGME49_263220 | 1.24  | 5.56 | 0.0050312 | 0.0205911 | rhoptry kinase family protein ROP21                                                  |
| TGME49_254090 | 1.04  | 6.60 | 0.0050392 | 0.0206128 | hypothetical protein                                                                 |
| TGME49_256090 | 2.08  | 4.88 | 0.0051382 | 0.020929  | glycerophosphodiester phosphodiesterase family protein                               |
| TGME49_309410 | 1.73  | 5.76 | 0.0051489 | 0.0209504 | AP2 domain transcription factor AP2XI-1                                              |
| TGME49_219660 | 2.01  | 4.74 | 0.00519   | 0.0210846 | hypothetical protein                                                                 |
| TGME49_251450 | 1.07  | 6.46 | 0.0052728 | 0.021387  | hypothetical protein                                                                 |
| TGME49_310390 | 1.13  | 7.18 | 0.0053346 | 0.0215814 | hypothetical protein                                                                 |
| TGME49_301350 | 1.65  | 5.02 | 0.0054512 | 0.0219725 | SNARE associated protein                                                             |
| TGME49_205200 | 1.69  | 6.62 | 0.0055026 | 0.0221335 | hypothetical protein                                                                 |
| TGME49_254950 | 1.22  | 5.55 | 0.0055886 | 0.0223862 | RNA cap guanine-N2 methyltransferase                                                 |
| TGME49_206340 | 1.06  | 8.06 | 0.0056366 | 0.0225014 | hypothetical protein                                                                 |
| TGME49_286430 | 1.30  | 5.67 | 0.0056583 | 0.0225719 | hypothetical protein                                                                 |
| TGME49_243680 | 2.16  | 4.51 | 0.0056799 | 0.022623  | dihydrodipicolinate reductase                                                        |
| TGME49_250955 | 1.83  | 6.73 | 0.0057673 | 0.0229003 | KRUF family protein                                                                  |
| TGME49_251920 | 1.77  | 5.21 | 0.0059116 | 0.0233206 | hypothetical protein                                                                 |
| TGME49_277070 | 1.40  | 5.66 | 0.0059636 | 0.0234868 | SWI2/SNF2-containing protein                                                         |
| TGME49_280470 | 1.48  | 6.49 | 0.0059876 | 0.0235692 | AP2 domain transcription factor AP2VIIa-1                                            |
| TGME49_254890 | 1.78  | 5.36 | 0.0061005 | 0.0239406 | hypothetical protein                                                                 |
| TGME49_238970 | -5.69 | 4.46 | 0.0061053 | 0.0239472 | hypothetical protein                                                                 |
| TGME49_254280 | 2.05  | 5.22 | 0.0061742 | 0.0241397 | DNA-directed RNA polymerase III RPC9                                                 |
| TGME49_224890 | 1.10  | 7.05 | 0.006255  | 0.0244042 | hypothetical protein                                                                 |
| TGME49_218610 | 1.22  | 5.72 | 0.006279  | 0.0244358 | ATPase (DUF699) protein                                                              |
| TGME49_214960 | 1.21  | 6.75 | 0.00632   | 0.024528  | AP2 domain transcription factor AP2X-8                                               |
| TGME49_228150 | 1.65  | 7.14 | 0.006329  | 0.0245505 | hypothetical protein                                                                 |
| TGME49_242730 | 1.32  | 6.07 | 0.0064318 | 0.0249242 | guanylate kinase family protein                                                      |
| TGME49_233770 | 2.02  | 6.44 | 0.0064581 | 0.0249707 | calcium-translocating P-type ATPase, PMCA-type protein                               |
| TGME49_215750 | 1.71  | 4.88 | 0.0064608 | 0.0249707 | cytidine and deoxycytidylate deaminase zinc-binding region domain-containing protein |
| TGME49_255350 | 1.52  | 5.11 | 0.0064631 | 0.0249707 | ATPase, putative                                                                     |
| TGME49_320700 | 1.20  | 5.53 | 0.0065432 | 0.0252298 | AP2 domain transcription factor AP2IV-1                                              |
| TGME49_225230 | 1.32  | 6.39 | 0.0066615 | 0.0255712 | hypothetical protein                                                                 |
| TGME49_278080 | 1.46  | 5.97 | 0.0069742 | 0.0265257 | Toxoplasma gondii family A protein                                                   |
| TGME49_249410 | 1.81  | 6.16 | 0.0070756 | 0.0268448 | hypothetical protein                                                                 |
| TGME49_211610 | 1.65  | 5.95 | 0.0070935 | 0.0268822 | hypothetical protein                                                                 |
| TGME49_308965 | 2.09  | 4.65 | 0.0071947 | 0.027199  | hypothetical protein                                                                 |
| TGME49_270595 | 1.30  | 7.13 | 0.0073229 | 0.0275492 | UBA/TS-N domain-containing protein                                                   |
| TGME49_220250 | 1.57  | 6.85 | 0.0073531 | 0.0276222 | Nucleotide-sensitive chloride conductance regulator (ICln) protein                   |
| TGME49_218740 | 1.93  | 5.59 | 0.0074568 | 0.0279036 | membrane protein, putative                                                           |
| TGME49_277090 | 1.17  | 6.97 | 0.0074609 | 0.0279051 | carrier superfamily protein                                                          |
| TGME49_273640 | 1.29  | 5.96 | 0.0077969 | 0.0290495 | hypothetical protein                                                                 |
| TGME49_225470 | 1.11  | 6.33 | 0.007813  | 0.0290825 | peptide methionine sulfoxide reductase                                               |
| TGME49_288370 | 1.26  | 5.61 | 0.0078428 | 0.0291504 | hypothetical protein                                                                 |
| TGME49_268840 | 1.09  | 5.80 | 0.0080056 | 0.0296274 | N6-adenosine-methyltransferase, putative                                             |
| TGME49_270890 | 1.34  | 6.23 | 0.0081428 | 0.0300343 | hypothetical protein                                                                 |
| TGME49_200385 | 1.25  | 8.25 | 0.0081973 | 0.0301921 | Myb family DNA-binding domain-containing protein                                     |
| TGME49_253510 | 1.14  | 6.34 | 0.0085099 | 0.0312247 | transporter/permease protein                                                         |

|               |       |      |           |           |                                                               |
|---------------|-------|------|-----------|-----------|---------------------------------------------------------------|
| TGME49_289550 | 1.02  | 6.24 | 0.0087685 | 0.0320365 | WD domain, G-beta repeat-containing protein                   |
| TGME49_297730 | 1.14  | 5.99 | 0.0089858 | 0.0326913 | transcription elongation factor 1, putative                   |
| TGME49_232960 | 1.07  | 7.02 | 0.0089926 | 0.0326922 | oxidoreductase, 2OG-Fe(II) oxygenase family protein           |
| TGME49_250940 | 1.01  | 6.67 | 0.0090802 | 0.0329726 | hypothetical protein                                          |
| TGME49_266880 | 1.76  | 5.44 | 0.0092208 | 0.033452  | dihydrouridine synthase, putative                             |
| TGME49_217560 | 1.68  | 6.33 | 0.0092334 | 0.0334821 | DNA-directed RNA polymerase II RPB10                          |
| TGME49_226640 | 2.02  | 5.09 | 0.0095497 | 0.034403  | zinc binding protein, putative                                |
| TGME49_319090 | 1.64  | 4.44 | 0.0096092 | 0.0346012 | IgA-specific serine endopeptidase                             |
| TGME49_304490 | 1.70  | 6.34 | 0.0096709 | 0.0347208 | hypothetical protein                                          |
| TGME49_261590 | 1.15  | 5.50 | 0.0096739 | 0.0347208 | ankyrin, putative                                             |
| TGME49_237015 | 1.03  | 7.54 | 0.0097246 | 0.0348705 | hypothetical protein                                          |
| TGME49_277870 | 1.58  | 6.38 | 0.0098135 | 0.0351241 | hypothetical protein                                          |
| TGME49_252880 | 1.02  | 7.59 | 0.0098238 | 0.0351285 | hypothetical protein                                          |
| TGME49_250500 | 1.99  | 4.89 | 0.009862  | 0.0352073 | hypothetical protein                                          |
| TGME49_222970 | 1.37  | 6.07 | 0.0098725 | 0.035221  | inositol(myo)-1(or 4)-monophosphatase 2, putative             |
| TGME49_202310 | 1.01  | 6.02 | 0.0100534 | 0.0357182 | O-sialoglycoprotein endopeptidase                             |
| TGME49_250670 | 1.76  | 6.34 | 0.0100743 | 0.0357762 | hypothetical protein                                          |
| TGME49_305080 | 1.40  | 5.45 | 0.0101734 | 0.0360722 | hypothetical protein                                          |
| TGME49_217430 | 1.15  | 5.77 | 0.0102379 | 0.0362405 | protease inhibitor PI1                                        |
| TGME49_225410 | 1.29  | 5.30 | 0.0103324 | 0.036508  | histone H3 centromeric CENH3                                  |
| TGME49_227860 | 1.15  | 5.38 | 0.0104556 | 0.0368927 | hypothetical protein                                          |
| TGME49_261220 | 1.34  | 5.51 | 0.0106235 | 0.0374    | transcription elongation factor SPT4                          |
| TGME49_270300 | 1.06  | 6.87 | 0.0106487 | 0.0374545 | hypothetical protein                                          |
| TGME49_270610 | 1.31  | 5.36 | 0.0108755 | 0.0380789 | hypothetical protein                                          |
| TGME49_252870 | 1.25  | 4.81 | 0.0114827 | 0.0397372 | hypothetical protein                                          |
| TGME49_319620 | 1.30  | 5.96 | 0.0117027 | 0.0404131 | hypothetical protein                                          |
| TGME49_301180 | -5.93 | 4.45 | 0.0117273 | 0.0404389 | SAG-related sequence SRS19F                                   |
| TGME49_268980 | 1.48  | 8.06 | 0.0117812 | 0.0405703 | hypothetical protein                                          |
| TGME49_218950 | 1.79  | 5.54 | 0.0118847 | 0.0408689 | hypothetical protein                                          |
| TGME49_267970 | 1.26  | 5.47 | 0.0118891 | 0.0408689 | DEAD/DEAH box helicase domain-containing protein              |
| TGME49_285470 | 1.54  | 5.82 | 0.0119801 | 0.041054  | patched family protein                                        |
| TGME49_240300 | 1.30  | 5.42 | 0.0120055 | 0.0410915 | zinc finger domain, LSD1 subclass domain-containing protein   |
| TGME49_289250 | 1.70  | 5.80 | 0.012204  | 0.0416001 | cyclophilin, putative                                         |
| TGME49_220208 | 1.33  | 5.09 | 0.012628  | 0.0427572 | hypothetical protein                                          |
| TGME49_257020 | 1.02  | 6.00 | 0.012728  | 0.0430072 | hypothetical protein                                          |
| TGME49_230150 | 1.11  | 5.95 | 0.0127475 | 0.0430377 | ChAPs (Chs5p-Arf1p-binding proteins) protein                  |
| TGME49_294990 | 1.13  | 6.50 | 0.0131865 | 0.0442661 | hypothetical protein                                          |
| TGME49_236670 | 1.20  | 5.77 | 0.0133237 | 0.0446299 | hypothetical protein                                          |
| TGME49_309190 | 1.06  | 6.91 | 0.013401  | 0.0447917 | hypothetical protein                                          |
| TGME49_312280 | 1.13  | 7.06 | 0.0134487 | 0.0448901 | pre-mRNA-splicing factor ATP-dependent RNA helicase, putative |
| TGME49_208722 | 1.76  | 5.42 | 0.0134643 | 0.0448901 | hypothetical protein                                          |
| TGME49_256880 | 1.13  | 5.82 | 0.0140952 | 0.046648  | protein kinase domain-containing protein                      |
| TGME49_222850 | 1.23  | 7.66 | 0.0145545 | 0.0477592 | stress responsive a/b barrel domain-containing protein        |
| TGME49_219150 | 1.76  | 5.80 | 0.0148013 | 0.0484396 | zinc finger, zz type domain-containing protein                |
| TGME49_216030 | 1.67  | 4.95 | 0.0149234 | 0.048692  | hypothetical protein                                          |
| TGME49_222180 | 1.89  | 4.90 | 0.0149785 | 0.0488398 | hypothetical protein                                          |
| TGME49_227430 | 1.03  | 6.42 | 0.0150796 | 0.0491278 | transmembrane amino acid transporter protein                  |

|               |      |      |           |           |                                                                   |
|---------------|------|------|-----------|-----------|-------------------------------------------------------------------|
| TGME49_221500 | 1.65 | 5.74 | 0.0151474 | 0.0492967 | dual specificity phosphatase, catalytic domain-containing protein |
| TGME49_220260 | 1.31 | 5.31 | 0.0154095 | 0.0499241 | hypothetical protein                                              |

**Supplementary Table S3B: Differential *T. gondii* gene expression analysis of human HFF cells infected with *T. gondii* EGS strain for 18 hours compared to the average *T. gondii* gene expression of human MM6 and neuronal stem cells infected with either GT1, ME49 or VEG strains of *T. gondii* for 18 hours.**

| gene ID       | logFC  | logCPM | PValue    | FDR       | Product name                                                          |
|---------------|--------|--------|-----------|-----------|-----------------------------------------------------------------------|
| TGME49_457990 | 17.05  | 11.10  | 2.48E-155 | 1.91E-151 | 28S ribosomal RNA                                                     |
| TGME49_462910 | 12.08  | 7.86   | 9.78E-138 | 3.78E-134 | large subunit ribosomal RNA                                           |
| TGME49_280570 | 5.30   | 8.90   | 3.57E-69  | 9.20E-66  | SAG-related sequence SRS35A                                           |
| TGME49_205250 | 3.92   | 9.76   | 7.12E-63  | 1.38E-59  | rhostry protein ROP18                                                 |
| TGME49_200010 | 9.86   | 6.04   | 1.83E-51  | 2.82E-48  | hypothetical protein                                                  |
| TGME49_214080 | 4.01   | 9.15   | 1.40E-44  | 1.81E-41  | toxofilin                                                             |
| TGME49_207210 | 4.66   | 7.68   | 4.55E-39  | 5.03E-36  | hypothetical protein                                                  |
| TGME49_301250 | 3.87   | 14.08  | 4.14E-30  | 4.00E-27  | hypothetical protein                                                  |
| TGME49_252640 | 6.04   | 6.77   | 1.12E-29  | 9.62E-27  | P-type ATPase PMA1                                                    |
| TGME49_293790 | 4.41   | 6.58   | 4.09E-26  | 3.16E-23  | hypothetical protein                                                  |
| TGME49_291040 | 4.24   | 7.28   | 4.73E-26  | 3.32E-23  | lactate dehydrogenase LDH2                                            |
| TGME49_221840 | 4.17   | 5.63   | 9.11E-22  | 5.87E-19  | hypothetical protein                                                  |
| TGME49_237130 | 4.00   | 9.60   | 3.68E-21  | 2.19E-18  | cytochrome b, putative                                                |
| TGME49_206550 | 4.04   | 6.24   | 4.05E-21  | 2.24E-18  | hypothetical protein                                                  |
| TGME49_321480 | 5.25   | 5.82   | 2.01E-20  | 1.03E-17  | SAG-related sequence SRS12B                                           |
| TGME49_202020 | 3.09   | 8.16   | 2.25E-20  | 1.09E-17  | DnAK-TPR                                                              |
| TGME49_209755 | 4.10   | 7.50   | 7.15E-20  | 3.07E-17  | hypothetical protein                                                  |
| TGME49_259020 | 4.75   | 7.36   | 7.15E-20  | 3.07E-17  | bradyzoite antigen BAG1                                               |
| TGME49_278080 | 4.04   | 5.97   | 3.85E-19  | 1.57E-16  | Toxoplasma gondii family A protein                                    |
| TGME49_330000 | 3.95   | 9.57   | 1.01E-16  | 3.90E-14  | cytochrome b                                                          |
| TGME49_243470 | 4.58   | 4.96   | 3.70E-14  | 1.27E-11  | hypothetical protein                                                  |
| TGME49_312160 | 2.15   | 8.48   | 3.79E-14  | 1.27E-11  | hypothetical protein                                                  |
| TGME49_209985 | 2.97   | 6.55   | 8.58E-14  | 2.76E-11  | cAMP-dependent protein kinase                                         |
| TGME49_310970 | -4.58  | 7.27   | 1.30E-13  | 4.03E-11  | hypothetical protein                                                  |
| TGME49_239530 | -6.09  | 7.04   | 5.67E-13  | 1.69E-10  | alanine-glyoxylate aminotransferase                                   |
| TGME49_207160 | 3.72   | 7.01   | 7.98E-13  | 2.29E-10  | SAG-related sequence SRS49D                                           |
| TGME49_244700 | -4.99  | 7.43   | 8.56E-13  | 2.36E-10  | NAD(+)/NADH kinase domain-containing protein                          |
| TGME49_217740 | -9.88  | 6.50   | 4.37E-12  | 1.13E-09  | 3-ketoacyl-(acyl-carrier-protein) reductase                           |
| TGME49_323400 | 3.56   | 8.61   | 9.15E-12  | 2.21E-09  | cytochrome c oxidase subunit iii subfamily protein                    |
| TGME49_216140 | 2.20   | 7.81   | 1.61E-11  | 3.77E-09  | tetratricopeptide repeat-containing protein                           |
| TGME49_253330 | 2.37   | 8.53   | 7.79E-11  | 1.77E-08  | Rhoptry kinase family protein, truncated (incomplete catalytic triad) |
| TGME49_249260 | -9.86  | 6.77   | 9.93E-11  | 2.16E-08  | cell-cycle-associated protein kinase CDK, putative                    |
| TGME49_255060 | 3.16   | 9.20   | 1.01E-10  | 2.16E-08  | cytochrome b(N-terminal)/b6/petB subfamily protein                    |
| TGME49_252070 | 3.55   | 5.64   | 4.88E-10  | 9.67E-08  | KRUF family protein                                                   |
| TGME49_305460 | 2.07   | 7.84   | 8.23E-10  | 1.56E-07  | methionine aminopeptidase 2, putative                                 |
| TGME49_313270 | -4.80  | 6.83   | 8.65E-10  | 1.56E-07  | hypothetical protein                                                  |
| TGME49_315100 | 3.51   | 5.66   | 1.41E-09  | 2.42E-07  | hypothetical protein                                                  |
| TGME49_260430 | 3.55   | 5.07   | 1.64E-09  | 2.76E-07  | hypothetical protein                                                  |
| TGME49_225290 | 2.64   | 6.51   | 2.05E-09  | 3.38E-07  | GDA1/CD39 (nucleoside phosphatase) family protein                     |
| TGME49_208730 | 1.74   | 8.82   | 5.87E-09  | 9.26E-07  | microneme protein, putative                                           |
| TGME49_290970 | 2.59   | 7.40   | 7.39E-09  | 1.12E-06  | 8-amino-7-oxononanoate synthase                                       |
| TGME49_254460 | 1.68   | 7.76   | 8.00E-09  | 1.19E-06  | hypothetical protein                                                  |
| TGME49_312660 | -9.00  | 6.00   | 9.49E-09  | 1.38E-06  | hypothetical protein                                                  |
| TGME49_209970 | -9.27  | 6.12   | 1.09E-08  | 1.56E-06  | Spc97 / Spc98 family protein                                          |
| TGME49_253100 | 1.49   | 7.65   | 1.40E-08  | 1.93E-06  | hypothetical protein                                                  |
| TGME49_243210 | -10.07 | 6.87   | 2.36E-08  | 3.06E-06  | DUF862 domain-containing protein                                      |
| TGME49_202025 | 3.76   | 4.49   | 2.37E-08  | 3.06E-06  | hypothetical protein                                                  |
| TGME49_319730 | -8.83  | 5.87   | 4.34E-08  | 5.02E-06  | YOU2 family C2C2 zinc finger protein                                  |
| TGME49_310530 | -9.05  | 5.82   | 4.52E-08  | 5.14E-06  | SNF2 family N-terminal domain-containing protein                      |

|               |       |       |          |           |                                                         |
|---------------|-------|-------|----------|-----------|---------------------------------------------------------|
| TGME49_299990 | 1.99  | 5.96  | 5.79E-08 | 6.48E-06  | archease family protein                                 |
| TGME49_208740 | 1.28  | 9.94  | 7.09E-08 | 7.72E-06  | microneme protein, putative                             |
| TGME49_275870 | 2.37  | 6.07  | 7.43E-08 | 7.98E-06  | tubulin/FtsZ family, GTPase domain-containing protein   |
| TGME49_291810 | -4.40 | 6.35  | 8.89E-08 | 9.29E-06  | thioredoxin domain-containing protein                   |
| TGME49_269438 | -9.21 | 6.22  | 9.27E-08 | 9.56E-06  | hypothetical protein                                    |
| TGME49_290700 | 1.34  | 8.51  | 1.06E-07 | 1.08E-05  | hypothetical protein                                    |
| TGME49_241305 | -8.92 | 6.00  | 1.07E-07 | 1.08E-05  | hypothetical protein                                    |
| TGME49_312430 | -8.70 | 5.72  | 1.29E-07 | 1.26E-05  | hypothetical protein                                    |
| TGME49_209070 | -9.94 | 6.81  | 1.86E-07 | 1.77E-05  | hypothetical protein                                    |
| TGME49_228180 | -8.92 | 5.90  | 2.09E-07 | 1.92E-05  | cytochrome C oxidase assembly factor COX15, putative    |
| TGME49_286928 | -8.89 | 5.85  | 2.11E-07 | 1.92E-05  | hypothetical protein                                    |
| TGME49_318575 | -8.67 | 5.62  | 2.37E-07 | 2.13E-05  | hypothetical protein                                    |
| TGME49_293780 | 1.77  | 7.63  | 2.63E-07 | 2.33E-05  | hypothetical protein                                    |
| TGME49_264670 | -8.85 | 5.75  | 3.39E-07 | 2.91E-05  | DNA polymerase family B protein                         |
| TGME49_229200 | -8.72 | 5.49  | 3.85E-07 | 3.27E-05  | hypothetical protein                                    |
| TGME49_268860 | 3.33  | 5.85  | 3.89E-07 | 3.27E-05  | enolase 1                                               |
| TGME49_268840 | -8.64 | 5.80  | 4.56E-07 | 3.75E-05  | N6-adenosine-methyltransferase, putative                |
| TGME49_273840 | -8.66 | 5.51  | 4.88E-07 | 3.97E-05  | brix domain-containing protein                          |
| TGME49_298990 | 1.79  | 6.52  | 5.07E-07 | 4.08E-05  | ferredoxin NADP+ oxidoreductase FNR                     |
| TGME49_234980 | -4.80 | 6.46  | 5.13E-07 | 4.09E-05  | hypothetical protein                                    |
| TGME49_222948 | -8.96 | 5.77  | 5.72E-07 | 4.47E-05  | hypothetical protein                                    |
| TGME49_216335 | 2.91  | 5.09  | 6.80E-07 | 5.21E-05  | hypothetical protein                                    |
| TGME49_312140 | -4.37 | 8.23  | 7.28E-07 | 5.52E-05  | hypothetical protein                                    |
| TGME49_232410 | 1.17  | 9.84  | 7.43E-07 | 5.57E-05  | PDI family protein                                      |
| TGME49_224600 | -8.73 | 5.68  | 7.90E-07 | 5.87E-05  | GTP binding protein                                     |
| TGME49_216930 | 1.78  | 7.26  | 8.10E-07 | 5.92E-05  | cholinephosphate cytidyltransferase                     |
| TGME49_314250 | 3.09  | 5.27  | 8.21E-07 | 5.93E-05  | bradyzoite rhoptry protein BRP1                         |
| TGME49_220370 | -5.05 | 6.18  | 8.62E-07 | 6.12E-05  | hypothetical protein                                    |
| TGME49_272000 | -8.53 | 5.44  | 1.01E-06 | 7.00E-05  | hypothetical protein                                    |
| TGME49_271320 | 2.97  | 4.81  | 1.10E-06 | 7.50E-05  | hypothetical protein                                    |
| TGME49_268225 | -9.66 | 6.16  | 1.30E-06 | 8.62E-05  | hypothetical protein                                    |
| TGME49_232035 | -8.62 | 5.47  | 1.30E-06 | 8.62E-05  | hypothetical protein                                    |
| TGME49_213060 | -4.64 | 6.07  | 1.37E-06 | 8.89E-05  | WD domain, G-beta repeat-containing protein             |
| TGME49_232550 | 1.62  | 7.77  | 1.58E-06 | 9.98E-05  | hypothetical protein                                    |
| TGME49_252420 | 2.16  | 5.41  | 1.78E-06 | 0.0001113 | histone arginine methyltransferase PRMT3                |
| TGME49_256880 | -8.61 | 5.82  | 1.87E-06 | 0.0001157 | protein kinase domain-containing protein                |
| TGME49_245580 | -8.59 | 5.61  | 1.93E-06 | 0.0001184 | hypothetical protein                                    |
| TGME49_312105 | -8.91 | 5.62  | 2.34E-06 | 0.0001396 | hypothetical protein                                    |
| TGME49_268230 | -9.26 | 5.82  | 2.35E-06 | 0.0001396 | hypothetical protein                                    |
| TGME49_278500 | -8.69 | 5.44  | 2.43E-06 | 0.000141  | ribosomal RNA large subunit methyltransferase J protein |
| TGME49_309950 | -8.44 | 5.44  | 2.53E-06 | 0.0001457 | NLE (NUC135) domain-containing protein                  |
| TGME49_254920 | 2.59  | 5.18  | 2.95E-06 | 0.0001653 | hypothetical protein                                    |
| TGME49_221900 | -8.31 | 5.36  | 2.97E-06 | 0.0001654 | hypothetical protein                                    |
| TGME49_311100 | 1.01  | 9.34  | 3.24E-06 | 0.0001788 | zinc finger (CCCH type) motif-containing protein        |
| TGME49_249560 | -8.51 | 5.36  | 3.28E-06 | 0.0001795 | DNA-directed RNA polymerase alpha chain rpoA            |
| TGME49_264660 | 1.56  | 9.56  | 3.62E-06 | 0.0001958 | SAG-related sequence SRS44                              |
| TGME49_238020 | -8.56 | 5.54  | 3.90E-06 | 0.0002067 | hypothetical protein                                    |
| TGME49_240970 | -8.94 | 5.78  | 3.96E-06 | 0.000208  | hypothetical protein                                    |
| TGME49_275860 | 1.13  | 9.69  | 4.30E-06 | 0.0002248 | hypothetical protein                                    |
| TGME49_301430 | -8.67 | 5.56  | 4.48E-06 | 0.0002308 | septum formation protein maf, putative                  |
| TGME49_214340 | -4.76 | 6.07  | 4.78E-06 | 0.0002448 | hypothetical protein                                    |
| TGME49_230000 | -8.74 | 5.70  | 5.09E-06 | 0.0002591 | hypothetical protein                                    |
| TGME49_246060 | -8.27 | 5.10  | 5.39E-06 | 0.0002706 | DNA-dependent RNA polymerase                            |
| TGME49_263710 | -5.14 | 6.15  | 5.63E-06 | 0.0002808 | acyl-CoA:cholesterol acyltransferase alpha ACAT1-alpha  |
| TGME49_261740 | 1.22  | 11.35 | 6.17E-06 | 0.0003039 | hypothetical protein                                    |
| TGME49_242845 | -8.83 | 5.62  | 6.32E-06 | 0.0003088 | hypothetical protein                                    |
| TGME49_305050 | 1.88  | 7.40  | 6.35E-06 | 0.0003088 | calmodulin, putative                                    |
| TGME49_246590 | -8.29 | 5.43  | 6.60E-06 | 0.0003185 | hypothetical protein                                    |
| TGME49_235460 | -8.56 | 5.57  | 6.74E-06 | 0.0003214 | hypothetical protein                                    |

|               |       |       |          |           |                                                                          |
|---------------|-------|-------|----------|-----------|--------------------------------------------------------------------------|
| TGME49_266950 | -9.24 | 6.38  | 6.89E-06 | 0.0003267 | protein kinase, putative                                                 |
| TGME49_222370 | 1.35  | 7.44  | 7.54E-06 | 0.0003532 | SAG-related sequence SRS13                                               |
| TGME49_212940 | -8.65 | 5.91  | 8.71E-06 | 0.0003984 | hypothetical protein                                                     |
| TGME49_219290 | -8.61 | 5.50  | 8.95E-06 | 0.0004071 | F-actin-capping protein subunit beta, putative                           |
| TGME49_203760 | -8.87 | 5.77  | 9.15E-06 | 0.0004135 | hypothetical protein                                                     |
| TGME49_299030 | 1.42  | 7.72  | 9.70E-06 | 0.0004361 | RNA recognition motif 2 protein                                          |
| TGME49_246200 | -8.46 | 5.41  | 9.93E-06 | 0.0004437 | zinc finger (CCCH type) motif-containing protein                         |
| TGME49_254390 | 1.48  | 7.74  | 1.02E-05 | 0.0004509 | CRAL/TRIO domain-containing protein                                      |
| TGME49_277260 | 1.36  | 10.15 | 1.15E-05 | 0.0005031 | hypothetical protein                                                     |
| TGME49_313960 | -8.02 | 5.12  | 1.20E-05 | 0.0005226 | ribosomal protein L19 protein                                            |
| TGME49_249480 | 1.62  | 6.66  | 1.22E-05 | 0.0005261 | tetratricopeptide repeat-containing protein                              |
| TGME49_254080 | 1.09  | 8.07  | 1.27E-05 | 0.0005438 | metal cation transporter, ZIP family protein                             |
| TGME49_230110 | -8.60 | 5.37  | 1.37E-05 | 0.000574  | hypothetical protein                                                     |
| TGME49_221220 | 2.68  | 5.26  | 1.42E-05 | 0.000586  | hypothetical protein                                                     |
| TGME49_255350 | 2.40  | 5.11  | 1.52E-05 | 0.0006176 | ATPase, putative                                                         |
| TGME49_315280 | -8.97 | 5.60  | 1.60E-05 | 0.0006352 | hypothetical protein                                                     |
| TGME49_268770 | -8.36 | 5.20  | 1.65E-05 | 0.0006458 | dual specificity phosphatase, catalytic domain-containing protein        |
| TGME49_240660 | -8.25 | 5.27  | 1.68E-05 | 0.0006556 | hypothetical protein                                                     |
| TGME49_225680 | -8.69 | 5.26  | 1.73E-05 | 0.0006725 | hypothetical protein                                                     |
| TGME49_288475 | 3.36  | 6.01  | 1.80E-05 | 0.0006967 | hypothetical protein                                                     |
| TGME49_244160 | -8.35 | 5.43  | 1.82E-05 | 0.0006997 | transcription initiation factor TFIID complex subunit TAF12              |
| TGME49_250220 | 1.94  | 6.34  | 1.86E-05 | 0.0007127 | hypothetical protein                                                     |
| TGME49_253690 | 1.30  | 9.24  | 1.90E-05 | 0.0007172 | hypothetical protein                                                     |
| TGME49_271145 | -8.12 | 5.32  | 1.94E-05 | 0.0007285 | hypothetical protein                                                     |
| TGME49_212250 | 1.34  | 7.91  | 1.95E-05 | 0.0007285 | XPG N-terminal domain-containing protein                                 |
| TGME49_319940 | -8.14 | 5.23  | 1.98E-05 | 0.0007356 | hypothetical protein                                                     |
| TGME49_208370 | 1.14  | 9.24  | 2.07E-05 | 0.0007582 | myosin heavy chain, putative                                             |
| TGME49_267970 | -8.22 | 5.47  | 2.12E-05 | 0.0007617 | DEAD/DEAH box helicase domain-containing protein                         |
| TGME49_243298 | -8.28 | 5.17  | 2.12E-05 | 0.0007617 | ICE family protease (caspase) p20 domain-containing protein              |
| TGME49_297320 | -9.10 | 5.78  | 2.14E-05 | 0.0007623 | hypothetical protein                                                     |
| TGME49_268170 | -8.39 | 5.04  | 2.32E-05 | 0.0008125 | hypothetical protein                                                     |
| TGME49_221585 | -8.87 | 5.69  | 2.32E-05 | 0.0008125 | hypothetical protein                                                     |
| TGME49_313440 | 1.91  | 8.63  | 2.42E-05 | 0.0008388 | hypothetical protein                                                     |
| TGME49_270620 | -8.01 | 5.35  | 2.51E-05 | 0.0008656 | DEAD/DEAH box helicase domain-containing protein                         |
| TGME49_278270 | -8.09 | 5.09  | 2.75E-05 | 0.0009382 | nucleolar protein, structural component of H/ACA snoRNPs, putative       |
| TGME49_254630 | 1.35  | 7.14  | 3.02E-05 | 0.0010164 | CMGC kinase                                                              |
| TGME49_298060 | -8.32 | 5.13  | 3.11E-05 | 0.0010425 | Toxoplasma gondii family C protein                                       |
| TGME49_263550 | 1.57  | 7.01  | 3.36E-05 | 0.0010978 | 39S ribosomal protein L47, mitochondrial precursor, putative             |
| TGME49_253510 | 1.81  | 6.34  | 3.37E-05 | 0.0010978 | transporter/permease protein                                             |
| TGME49_297510 | -8.78 | 5.54  | 3.50E-05 | 0.0011286 | hypothetical protein                                                     |
| TGME49_239710 | -8.73 | 5.40  | 3.58E-05 | 0.0011478 | phosphomannomutase                                                       |
| TGME49_285850 | -8.30 | 5.37  | 3.61E-05 | 0.0011492 | peptidyl-prolyl cis-trans isomerase, FKBP-type domain-containing protein |
| TGME49_313480 | -8.44 | 5.49  | 3.63E-05 | 0.00115   | hypothetical protein                                                     |
| TGME49_245980 | -8.63 | 6.49  | 3.78E-05 | 0.0011922 | hypothetical protein                                                     |
| TGME49_257290 | -8.13 | 5.45  | 3.97E-05 | 0.0012425 | RNA 2'-phosphotransferase, Tpt1/KptA family protein                      |
| TGME49_313200 | -8.34 | 5.22  | 4.04E-05 | 0.0012601 | leucine rich repeat-containing protein                                   |
| TGME49_296340 | 2.61  | 5.50  | 4.09E-05 | 0.0012686 | hypothetical protein                                                     |
| TGME49_248660 | 1.70  | 5.66  | 4.23E-05 | 0.0013077 | hypothetical protein                                                     |
| TGME49_252440 | 2.33  | 4.64  | 4.43E-05 | 0.0013474 | peptidase c13 family protein                                             |
| TGME49_254365 | 1.24  | 7.90  | 4.53E-05 | 0.0013695 | phosphatidate cytidylyltransferase                                       |
| TGME49_238190 | 1.55  | 6.14  | 4.69E-05 | 0.0014062 | DNA-directed RNA polymerase II RPB3                                      |
| TGME49_267340 | 1.84  | 5.39  | 4.92E-05 | 0.0014641 | hypothetical protein                                                     |
| TGME49_275640 | 1.46  | 7.24  | 5.25E-05 | 0.0015491 | hypothetical protein                                                     |
| TGME49_262050 | 1.14  | 9.45  | 5.55E-05 | 0.0016157 | rhoptyr kinase family protein ROP39                                      |

|               |       |      |           |           |                                                                              |
|---------------|-------|------|-----------|-----------|------------------------------------------------------------------------------|
| TGME49_204490 | -7.99 | 5.15 | 5.56E-05  | 0.0016157 | hypothetical protein                                                         |
| TGME49_232510 | -8.65 | 5.31 | 5.75E-05  | 0.0016588 | hypothetical protein                                                         |
| TGME49_228980 | -8.09 | 4.76 | 5.83E-05  | 0.0016767 | hypothetical protein                                                         |
| TGME49_283585 | -8.28 | 5.09 | 5.91E-05  | 0.0016867 | hypothetical protein                                                         |
| TGME49_247610 | -8.03 | 5.13 | 5.98E-05  | 0.0016995 | small nuclear ribonucleoprotein E, putative                                  |
| TGME49_240480 | -8.00 | 5.10 | 6.12E-05  | 0.0017198 | cpw-wpc domain-containing protein                                            |
| TGME49_244200 | 1.00  | 7.80 | 6.18E-05  | 0.0017249 | 2-oxoglutarate dehydrogenase e1 component, mitochondrial precursor, putative |
| TGME49_227100 | 3.51  | 4.82 | 6.20E-05  | 0.0017252 | hypothetical protein                                                         |
| TGME49_258940 | -7.94 | 5.16 | 6.69E-05  | 0.0018535 | acylphosphatase family protein                                               |
| TGME49_317705 | -5.13 | 5.96 | 6.81E-05  | 0.0018742 | enoyl-CoA hydratase/isomerase family protein                                 |
| TGME49_280580 | 1.89  | 6.00 | 7.12E-05  | 0.0019461 | SAG-related sequence SRS35B                                                  |
| TGME49_293500 | -8.17 | 5.24 | 7.37E-05  | 0.0019841 | hypothetical protein                                                         |
| TGME49_227115 | -8.32 | 5.16 | 7.47E-05  | 0.0020055 | hypothetical protein                                                         |
| TGME49_316090 | -7.84 | 5.01 | 7.91E-05  | 0.0021095 | RNAse P Rpr2/Rpp21 subunit domain-containing protein                         |
| TGME49_253790 | 1.16  | 7.52 | 8.14E-05  | 0.0021623 | zinc finger (CCCH type) motif-containing protein                             |
| TGME49_258780 | -8.93 | 5.89 | 8.17E-05  | 0.002163  | OTU family cysteine protease                                                 |
| TGME49_275780 | -7.96 | 5.09 | 8.30E-05  | 0.0021906 | hypothetical protein                                                         |
| TGME49_220230 | -4.57 | 5.80 | 8.44E-05  | 0.0022116 | leucine rich repeat-containing protein                                       |
| TGME49_255215 | -8.40 | 5.80 | 8.54E-05  | 0.002231  | hypothetical protein                                                         |
| TGME49_275750 | 1.29  | 7.30 | 9.56E-05  | 0.0024304 | small nuclear ribonucleoprotein E, putative                                  |
| TGME49_205010 | 1.08  | 7.54 | 9.87E-05  | 0.0024941 | U2 small nuclear ribonucleoprotein family protein, putative                  |
| TGME49_254690 | 1.06  | 8.49 | 0.0001114 | 0.0027754 | phospholipase/carboxylesterase                                               |
| TGME49_279540 | -8.17 | 4.83 | 0.0001161 | 0.0028492 | hypothetical protein                                                         |
| TGME49_244645 | -7.70 | 5.13 | 0.0001205 | 0.0029289 | hypothetical protein                                                         |
| TGME49_250900 | -7.59 | 4.48 | 0.0001245 | 0.0030174 | hypothetical protein                                                         |
| TGME49_301310 | -4.46 | 5.78 | 0.0001277 | 0.0030763 | hypothetical protein                                                         |
| TGME49_248670 | 1.02  | 8.72 | 0.0001322 | 0.0031712 | V-type H(+)-translocating pyrophosphatase VP1                                |
| TGME49_223150 | -8.54 | 5.16 | 0.0001325 | 0.0031712 | START domain-containing protein                                              |
| TGME49_230080 | -8.52 | 5.47 | 0.0001347 | 0.0032141 | DEAD/DEAH box helicase domain-containing protein                             |
| TGME49_226700 | -7.84 | 5.05 | 0.0001373 | 0.0032667 | nuclease, putative                                                           |
| TGME49_204520 | 2.00  | 5.24 | 0.0001395 | 0.0032683 | hypothetical protein                                                         |
| TGME49_235478 | -4.89 | 5.82 | 0.00014   | 0.0032683 | pantothenate kinase                                                          |
| TGME49_248440 | -8.41 | 5.74 | 0.0001401 | 0.0032683 | hypothetical protein                                                         |
| TGME49_255930 | -8.12 | 5.09 | 0.0001401 | 0.0032683 | hypothetical protein                                                         |
| TGME49_287040 | 1.24  | 7.28 | 0.0001405 | 0.0032683 | hypothetical protein                                                         |
| TGME49_226280 | -7.80 | 5.02 | 0.0001412 | 0.0032683 | ribosomal protein L28, putative                                              |
| TGME49_221370 | -8.41 | 5.18 | 0.0001521 | 0.0034376 | hypothetical protein                                                         |
| TGME49_310290 | -7.56 | 4.69 | 0.0001558 | 0.0035016 | regulator of chromosome condensation (RCC1) repeat-containing protein        |
| TGME49_264752 | -7.90 | 5.01 | 0.0001629 | 0.0036514 | HEAT repeat-containing protein                                               |
| TGME49_293260 | 1.17  | 8.31 | 0.000168  | 0.0037182 | ATPase/histidine kinase/DNA gyrase B/HSP90 domain-containing protein         |
| TGME49_232160 | 1.08  | 7.26 | 0.0001683 | 0.0037182 | zinc finger, C3HC4 type (RING finger) domain-containing protein              |
| TGME49_309390 | 2.01  | 4.86 | 0.0001694 | 0.0037322 | hypothetical protein                                                         |
| TGME49_314790 | -5.50 | 6.49 | 0.0001749 | 0.0038205 | small nuclear ribonucleoprotein G, putative                                  |
| TGME49_222940 | 3.09  | 5.20 | 0.0001766 | 0.0038341 | hypothetical protein                                                         |
| TGME49_309080 | -7.56 | 4.78 | 0.0001793 | 0.0038838 | hypothetical protein                                                         |
| TGME49_239087 | -8.18 | 5.02 | 0.000183  | 0.0039363 | hypothetical protein                                                         |
| TGME49_301170 | -7.88 | 5.29 | 0.0001838 | 0.0039363 | SAG-related sequence SRS19D                                                  |
| TGME49_269430 | -8.29 | 5.18 | 0.000189  | 0.0040361 | polyprenyl synthetase superfamily protein                                    |
| TGME49_289000 | -8.54 | 5.37 | 0.0001903 | 0.0040529 | hypothetical protein                                                         |
| TGME49_217450 | -8.05 | 5.18 | 0.0001927 | 0.0040703 | general transcription factor IIH polypeptide 5 GTF2H5                        |
| TGME49_277700 | -7.85 | 5.09 | 0.0001995 | 0.0041695 | ribosomal protein S14 precursor, putative                                    |
| TGME49_281950 | -8.54 | 5.46 | 0.0002202 | 0.0045596 | membrane protein, putative                                                   |
| TGME49_254770 | 1.21  | 6.69 | 0.0002224 | 0.004585  | Ser/Thr phosphatase family protein                                           |
| TGME49_287515 | -7.54 | 4.51 | 0.000229  | 0.0046833 | hypothetical protein                                                         |
| TGME49_209930 | -8.42 | 5.34 | 0.0002402 | 0.0048603 | hypothetical protein                                                         |



|               |       |      |           |           |                                                               |
|---------------|-------|------|-----------|-----------|---------------------------------------------------------------|
| TGME49_316470 | -8.45 | 5.70 | 0.0002452 | 0.0049238 | hypothetical protein                                          |
| TGME49_323010 | -7.77 | 4.68 | 0.0002467 | 0.0049316 | hypothetical protein                                          |
| TGME49_289010 | -8.16 | 5.19 | 0.0002473 | 0.0049316 | RNA recognition motif-containing protein                      |
| TGME49_258100 | -7.80 | 4.61 | 0.0002475 | 0.0049316 | TPR repeat region protein                                     |
| TGME49_243760 | -8.49 | 5.41 | 0.0002614 | 0.0051252 | hypothetical protein                                          |
| TGME49_297730 | 1.62  | 5.99 | 0.0002632 | 0.0051392 | transcription elongation factor 1, putative                   |
| TGME49_263215 | -7.63 | 4.62 | 0.0002664 | 0.0051816 | hypothetical protein                                          |
| TGME49_306338 | -8.39 | 5.67 | 0.0002668 | 0.0051816 | dynein gamma chain, flagellar outer arm, putative             |
| TGME49_254930 | 1.13  | 7.23 | 0.0002743 | 0.005275  | hypothetical protein                                          |
| TGME49_293860 | -4.63 | 5.67 | 0.0002743 | 0.005275  | hypothetical protein                                          |
| TGME49_275755 | 2.12  | 5.48 | 0.0002757 | 0.0052894 | hypothetical protein                                          |
| TGME49_270580 | -7.35 | 5.35 | 0.000277  | 0.0053001 | HECT-domain (ubiquitin-transferase) domain-containing protein |
| TGME49_287460 | 2.09  | 5.08 | 0.0002784 | 0.0053135 | hypothetical protein                                          |
| TGME49_236990 | 1.82  | 5.87 | 0.000279  | 0.0053135 | beta-ketoacyl synthase, N-terminal domain-containing protein  |
| TGME49_220150 | -8.31 | 5.06 | 0.0002818 | 0.0053535 | 50S ribosomal protein L16, putative                           |
| TGME49_236130 | -8.58 | 5.40 | 0.0002985 | 0.0055698 | signal recognition particle (SRP9) domain-containing protein  |
| TGME49_284170 | -7.74 | 4.84 | 0.000299  | 0.0055698 | DHHC zinc finger domain-containing protein                    |
| TGME49_321170 | 1.91  | 5.58 | 0.0002997 | 0.0055698 | Toxoplasma gondii family C protein                            |
| TGME49_218790 | -7.73 | 4.86 | 0.0003021 | 0.0055816 | elongation factor G C-terminus domain-containing protein      |
| TGME49_320700 | 1.63  | 5.53 | 0.0003025 | 0.0055816 | AP2 domain transcription factor AP2IV-1                       |
| TGME49_312380 | -8.23 | 4.91 | 0.0003286 | 0.0059913 | tetratricopeptide repeat-containing protein                   |
| TGME49_310200 | -8.08 | 5.12 | 0.0003294 | 0.0059918 | hypothetical protein                                          |
| TGME49_290240 | -8.41 | 5.39 | 0.0003307 | 0.0060015 | hypothetical protein                                          |
| TGME49_288290 | -8.19 | 5.36 | 0.0003358 | 0.0060369 | hypothetical protein                                          |
| TGME49_244680 | -7.56 | 4.87 | 0.000339  | 0.0060546 | hypothetical protein                                          |
| TGME49_293252 | 3.40  | 5.29 | 0.0003391 | 0.0060546 | hypothetical protein                                          |
| TGME49_301300 | -8.04 | 4.80 | 0.0003423 | 0.0060968 | hypothetical protein                                          |
| TGME49_242118 | -8.30 | 5.24 | 0.0003454 | 0.006109  | myosin-light-chain kinase                                     |
| TGME49_224200 | -7.93 | 4.82 | 0.0003462 | 0.006109  | tRNA pseudouridine synthase                                   |
| TGME49_220480 | -7.77 | 4.68 | 0.0003469 | 0.006109  | hypothetical protein                                          |
| TGME49_229290 | -7.60 | 4.45 | 0.0003503 | 0.0061405 | kelch repeat-containing protein                               |
| TGME49_295320 | -8.26 | 5.21 | 0.0003559 | 0.006225  | embryo sac development arrest EDA7, putative                  |
| TGME49_277560 | -8.40 | 5.26 | 0.0003596 | 0.0062473 | hypothetical protein                                          |
| TGME49_243265 | -7.82 | 5.00 | 0.0003621 | 0.0062483 | protamine P1 protein                                          |
| TGME49_229720 | -8.10 | 5.07 | 0.0003706 | 0.0063535 | hypothetical protein                                          |
| TGME49_220530 | -8.48 | 5.32 | 0.0003768 | 0.0064445 | AP2 domain transcription factor AP2V-1                        |
| TGME49_226090 | -7.82 | 4.52 | 0.0003831 | 0.0065061 | DEAD/DEAH box helicase domain-containing protein              |
| TGME49_262590 | -7.98 | 5.01 | 0.0003858 | 0.0065061 | hypothetical protein                                          |
| TGME49_270050 | 1.95  | 5.36 | 0.0003898 | 0.0065477 | hypothetical protein                                          |
| TGME49_270960 | -8.11 | 5.14 | 0.0003991 | 0.0066191 | hypothetical protein                                          |
| TGME49_269830 | 2.93  | 4.40 | 0.0004071 | 0.0066961 | RAP domain-containing protein                                 |
| TGME49_288845 | -8.19 | 5.04 | 0.0004106 | 0.006725  | hypothetical protein                                          |
| TGME49_257160 | 1.16  | 7.33 | 0.0004421 | 0.0071402 | hypothetical protein                                          |
| TGME49_243615 | -7.78 | 5.09 | 0.0004421 | 0.0071402 | hypothetical protein                                          |
| TGME49_264120 | -7.79 | 4.61 | 0.0004437 | 0.0071402 | Myb family DNA-binding domain-containing protein              |
| TGME49_297460 | -8.44 | 5.17 | 0.0004442 | 0.0071402 | hypothetical protein                                          |
| TGME49_312210 | 1.63  | 5.61 | 0.0004548 | 0.0072948 | hypothetical protein                                          |
| TGME49_254200 | 1.84  | 4.96 | 0.0004618 | 0.0073459 | anticodon binding domain-containing protein                   |
| TGME49_248800 | -7.78 | 5.02 | 0.0004702 | 0.0074637 | hypothetical protein                                          |
| TGME49_205050 | -8.15 | 5.33 | 0.0004763 | 0.0075307 | hypothetical protein                                          |
| TGME49_254135 | -7.46 | 4.78 | 0.000484  | 0.0076208 | hypothetical protein                                          |
| TGME49_311790 | 1.99  | 5.15 | 0.0004865 | 0.007629  | hypothetical protein                                          |
| TGME49_310410 | -7.42 | 4.48 | 0.0004878 | 0.007634  | WD domain, G-beta repeat-containing protein                   |
| TGME49_233838 | -7.66 | 4.41 | 0.0005113 | 0.0079212 | PET112 family, C terminal region domain-containing protein    |
| TGME49_227270 | -8.24 | 5.34 | 0.0005143 | 0.0079514 | hypothetical protein                                          |
| TGME49_254840 | -7.96 | 5.49 | 0.0005243 | 0.0080259 | tetratricopeptide repeat-containing protein                   |

|               |       |      |           |           |                                                                |
|---------------|-------|------|-----------|-----------|----------------------------------------------------------------|
| TGME49_260310 | 1.66  | 6.15 | 0.0005277 | 0.0080622 | ATP-binding cassette transporter ABC.B1                        |
| TGME49_288240 | -7.71 | 4.87 | 0.0005362 | 0.0081596 | hypothetical protein                                           |
| TGME49_242110 | -7.95 | 5.04 | 0.0005415 | 0.0081926 | rhoptry kinase family protein ROP38                            |
| TGME49_285510 | 1.03  | 7.63 | 0.0005514 | 0.0082786 | hypothetical protein                                           |
| TGME49_266740 | 2.00  | 5.45 | 0.0006052 | 0.0089888 | RNA recognition motif-containing protein                       |
| TGME49_204140 | -7.83 | 4.63 | 0.0006058 | 0.0089888 | PHD-finger domain-containing protein                           |
| TGME49_269940 | -7.77 | 4.83 | 0.0006204 | 0.0091226 | zinc finger motif, C2HC5-type protein                          |
| TGME49_300130 | 2.35  | 4.80 | 0.0006207 | 0.0091226 | apical membrane antigen 1 domain-containing protein            |
| TGME49_201180 | -8.19 | 5.26 | 0.0006271 | 0.0091473 | hypothetical protein                                           |
| TGME49_226670 | -7.51 | 4.64 | 0.000629  | 0.0091582 | hypothetical protein                                           |
| TGME49_316480 | -7.54 | 4.93 | 0.0006314 | 0.0091752 | XRN 5'-3' exonuclease N-terminus protein                       |
| TGME49_242670 | -7.47 | 4.42 | 0.0006337 | 0.0091914 | hypothetical protein                                           |
| TGME49_305120 | 1.15  | 7.25 | 0.0006353 | 0.0091983 | transporter, solute:sodium symporter (SSS) family protein      |
| TGME49_314530 | -7.84 | 4.86 | 0.0006401 | 0.0092503 | RPAP1 family, C-terminal protein                               |
| TGME49_300360 | -8.03 | 5.02 | 0.0006428 | 0.009256  | ADP/ATP translocase                                            |
| TGME49_215400 | -8.32 | 5.17 | 0.0006429 | 0.009256  | RNA recognition motif-containing protein                       |
| TGME49_210310 | -7.90 | 4.82 | 0.0006537 | 0.0093767 | hypothetical protein                                           |
| TGME49_305990 | 1.86  | 5.91 | 0.00066   | 0.0094494 | hypothetical protein                                           |
| TGME49_238070 | -8.06 | 4.94 | 0.0006641 | 0.0094904 | glutaredoxin domain-containing protein                         |
| TGME49_241175 | 1.89  | 4.72 | 0.0006705 | 0.0095462 | hypothetical protein                                           |
| TGME49_209460 | -7.93 | 4.78 | 0.0006918 | 0.0098276 | hypothetical protein                                           |
| TGME49_218850 | -7.60 | 4.54 | 0.0007134 | 0.0099828 | ribosomal protein RPS9                                         |
| TGME49_202240 | -7.95 | 4.79 | 0.0007241 | 0.0100259 | RAP domain-containing protein                                  |
| TGME49_257560 | -7.70 | 4.98 | 0.0007247 | 0.0100259 | WD domain, G-beta repeat-containing protein                    |
| TGME49_301280 | -7.38 | 4.50 | 0.0007249 | 0.0100259 | hypothetical protein                                           |
| TGME49_207180 | -7.87 | 4.94 | 0.0007501 | 0.0103187 | indole-3-glycerol phosphate synthase domain-containing protein |
| TGME49_224150 | -7.63 | 4.72 | 0.0007564 | 0.0103603 | hypothetical protein                                           |
| TGME49_268740 | -7.62 | 4.67 | 0.0007587 | 0.0103603 | hypothetical protein                                           |
| TGME49_218740 | -8.05 | 5.59 | 0.0007587 | 0.0103603 | membrane protein, putative                                     |
| TGME49_216370 | -7.59 | 4.47 | 0.0007635 | 0.0103734 | hypothetical protein                                           |
| TGME49_233450 | 1.33  | 8.80 | 0.0008014 | 0.0108314 | SAG-related sequence SRS29A                                    |
| TGME49_306620 | 1.44  | 6.77 | 0.0008097 | 0.010886  | AP2 domain transcription factor AP2IX-9                        |
| TGME49_246930 | 1.17  | 7.67 | 0.0008149 | 0.0109371 | calmodulin CAM1                                                |
| TGME49_222210 | -4.48 | 5.45 | 0.0008199 | 0.0109478 | SPFH domain / Band 7 family protein                            |
| TGME49_244510 | -7.66 | 4.44 | 0.0008256 | 0.0109713 | AP2 domain transcription factor AP2VI-3                        |
| TGME49_309610 | -7.99 | 4.83 | 0.0008342 | 0.0110431 | hypothetical protein                                           |
| TGME49_232640 | 1.73  | 5.52 | 0.0008409 | 0.0110989 | RNA 2'-phosphotransferase, Tpt1/KptA family protein            |
| TGME49_251590 | -4.36 | 5.78 | 0.0008427 | 0.0110989 | hypothetical protein                                           |
| TGME49_316490 | -7.84 | 4.86 | 0.0008612 | 0.0112852 | hypothetical protein                                           |
| TGME49_221980 | -7.78 | 4.78 | 0.0008746 | 0.0114017 | U1 zinc finger protein                                         |
| TGME49_223530 | 1.30  | 6.96 | 0.0008909 | 0.0115564 | hypothetical protein                                           |
| TGME49_318380 | -8.30 | 5.02 | 0.0009013 | 0.0116721 | hypothetical protein                                           |
| TGME49_246690 | -7.90 | 4.76 | 0.0009077 | 0.0117146 | alpha amylase, catalytic domain-containing protein             |
| TGME49_247290 | -8.11 | 5.13 | 0.0009235 | 0.0118792 | hypothetical protein                                           |
| TGME49_262000 | -7.73 | 4.68 | 0.000932  | 0.0119612 | AP2 domain transcription factor AP2VIIb-2                      |
| TGME49_277770 | -8.16 | 5.05 | 0.0009329 | 0.0119612 | hypothetical protein                                           |
| TGME49_285540 | -7.78 | 4.67 | 0.0009347 | 0.0119637 | DNA-directed DNA polymerase                                    |
| TGME49_225410 | 1.74  | 5.30 | 0.000943  | 0.0120107 | histone H3 centromeric CENH3                                   |
| TGME49_232220 | -7.38 | 4.35 | 0.0009568 | 0.0121267 | SWIB/MDM2 domain-containing protein                            |
| TGME49_253470 | 1.07  | 7.73 | 0.0009777 | 0.0123508 | alveolin domain containing intermediate filament IMC13         |
| TGME49_247340 | 2.56  | 5.26 | 0.000994  | 0.0125358 | hypothetical protein                                           |
| TGME49_258826 | -8.03 | 4.94 | 0.0010452 | 0.0130021 | hypothetical protein                                           |
| TGME49_285710 | 1.37  | 6.33 | 0.0010461 | 0.0130021 | hypothetical protein                                           |
| TGME49_228040 | -7.48 | 4.69 | 0.0010516 | 0.0130497 | PPIC-type PPIASE domain-containing protein                     |
| TGME49_311060 | -7.75 | 4.67 | 0.001066  | 0.0131857 | metal-dependent phosphohydrolase HD domain-containing protein  |
| TGME49_210478 | 2.80  | 4.55 | 0.0010783 | 0.0132959 | hypothetical protein                                           |
| TGME49_309000 | -7.64 | 4.58 | 0.0010817 | 0.0133159 | hypothetical protein                                           |

|               |       |      |           |           |                                                                                         |
|---------------|-------|------|-----------|-----------|-----------------------------------------------------------------------------------------|
| TGME49_305610 | -7.34 | 4.51 | 0.0011129 | 0.0136131 | hypothetical protein                                                                    |
| TGME49_273530 | -7.78 | 4.68 | 0.0011407 | 0.0137867 | flagellar associated protein                                                            |
| TGME49_246560 | 1.01  | 7.73 | 0.0011416 | 0.0137867 | vacuolar ATP synthase subunit g, putative                                               |
| TGME49_233830 | -7.61 | 4.39 | 0.0011434 | 0.0137867 | hypothetical protein                                                                    |
| TGME49_249450 | -7.65 | 4.57 | 0.0011452 | 0.0137867 | hypothetical protein                                                                    |
| TGME49_258820 | 1.08  | 8.23 | 0.0011496 | 0.0137867 | hypothetical protein                                                                    |
| TGME49_310910 | 1.39  | 5.82 | 0.0011506 | 0.0137867 | WD domain, G-beta repeat-containing protein                                             |
| TGME49_264070 | -7.41 | 4.80 | 0.0011582 | 0.0138388 | F5/8 type C domain-containing protein                                                   |
| TGME49_267775 | -7.80 | 4.74 | 0.0011919 | 0.0140387 | hypothetical protein                                                                    |
| TGME49_295020 | -7.23 | 4.83 | 0.001193  | 0.0140387 | Sterol-sensing domain of SREBP cleavage-activation domain-containing protein            |
| TGME49_217692 | -7.66 | 4.48 | 0.0012156 | 0.0142602 | hypothetical protein                                                                    |
| TGME49_310250 | -7.69 | 4.54 | 0.0012234 | 0.01433   | hypothetical protein                                                                    |
| TGME49_217470 | -7.70 | 4.81 | 0.0012315 | 0.0144035 | hypothetical protein                                                                    |
| TGME49_224170 | 2.43  | 6.03 | 0.0012754 | 0.0148545 | SAG-related sequence SRS60A                                                             |
| TGME49_219640 | -7.67 | 4.83 | 0.0012758 | 0.0148545 | hypothetical protein                                                                    |
| TGME49_271280 | -7.40 | 4.70 | 0.0013199 | 0.0151897 | 60S ribosome subunit biogenesis protein NIP7, putative                                  |
| TGME49_262810 | -7.54 | 4.44 | 0.0013218 | 0.0151897 | iron donor protein CyaY protein                                                         |
| TGME49_305455 | -7.11 | 4.39 | 0.0013293 | 0.0152251 | hypothetical protein                                                                    |
| TGME49_241860 | -7.70 | 4.57 | 0.0013574 | 0.015348  | N-acetylglucosaminyl-phosphatidylinositol biosynthetic protein PigA, family GT4 protein |
| TGME49_291590 | -7.62 | 4.47 | 0.0014007 | 0.0156489 | hypothetical protein                                                                    |
| TGME49_270940 | -7.74 | 4.64 | 0.0014076 | 0.0156971 | hypothetical protein                                                                    |
| TGME49_232240 | -7.27 | 4.44 | 0.0014091 | 0.0156971 | hypothetical protein                                                                    |
| TGME49_304640 | -7.64 | 4.49 | 0.0014229 | 0.0158052 | hypothetical protein                                                                    |
| TGME49_255160 | -7.75 | 4.70 | 0.0014402 | 0.0159512 | hypothetical protein                                                                    |
| TGME49_299270 | 1.55  | 5.46 | 0.0014858 | 0.0162702 | hypothetical protein                                                                    |
| TGME49_226640 | 2.46  | 5.09 | 0.0015181 | 0.0165532 | zinc binding protein, putative                                                          |
| TGME49_273550 | -8.07 | 4.90 | 0.0015222 | 0.0165745 | hypothetical protein                                                                    |
| TGME49_251530 | -7.49 | 4.66 | 0.0015439 | 0.0167168 | hypothetical protein                                                                    |
| TGME49_285170 | -7.62 | 4.38 | 0.001573  | 0.0169845 | methyltransferase small, putative                                                       |
| TGME49_299070 | 1.18  | 6.85 | 0.0016299 | 0.017501  | pyruvate kinase PyKII                                                                   |
| TGME49_205625 | -7.77 | 4.69 | 0.0016423 | 0.0175607 | hypothetical protein                                                                    |
| TGME49_283740 | -7.60 | 4.51 | 0.0016431 | 0.0175607 | RNA recognition motif-containing protein                                                |
| TGME49_262630 | -7.33 | 5.08 | 0.0016507 | 0.0176017 | hypothetical protein                                                                    |
| TGME49_268350 | -7.61 | 4.37 | 0.0016533 | 0.017606  | hypothetical protein                                                                    |
| TGME49_218192 | -7.59 | 4.97 | 0.0016853 | 0.0178975 | hypothetical protein                                                                    |
| TGME49_297925 | -7.46 | 4.45 | 0.0017012 | 0.0179915 | HesB-like domain-containing protein                                                     |
| TGME49_260150 | -7.18 | 4.60 | 0.0017282 | 0.0182519 | tetratricopeptide repeat-containing protein                                             |
| TGME49_221880 | -8.02 | 4.94 | 0.0017456 | 0.0183656 | hypothetical protein                                                                    |
| TGME49_215347 | -7.36 | 4.37 | 0.0017461 | 0.0183656 | hypothetical protein                                                                    |
| TGME49_246140 | -8.20 | 5.00 | 0.0017657 | 0.0185223 | hypothetical protein                                                                    |
| TGME49_318490 | -7.78 | 4.67 | 0.0017976 | 0.0187339 | hypothetical protein                                                                    |
| TGME49_241310 | -7.57 | 4.52 | 0.001798  | 0.0187339 | hypothetical protein                                                                    |
| TGME49_230920 | -7.70 | 4.59 | 0.0018451 | 0.0190961 | adaptor complexes medium subunit family protein                                         |
| TGME49_242580 | -7.80 | 4.77 | 0.0018546 | 0.0191103 | iron only hydrogenase large subunit, c-terminal domain-containing protein               |
| TGME49_253530 | -7.47 | 4.49 | 0.0018864 | 0.0192994 | hypothetical protein                                                                    |
| TGME49_314680 | -7.00 | 4.37 | 0.0018868 | 0.0192994 | hypothetical protein                                                                    |
| TGME49_235640 | -7.65 | 4.76 | 0.0018873 | 0.0192994 | formyl transferase domain-containing protein                                            |
| TGME49_244140 | -7.17 | 4.55 | 0.0019218 | 0.0195495 | hypothetical protein                                                                    |
| TGME49_243610 | -7.67 | 4.80 | 0.0019393 | 0.0196756 | C-5 cytosine-specific DNA methylase superfamily protein                                 |
| TGME49_209530 | -7.62 | 4.54 | 0.0019444 | 0.0196756 | hypothetical protein                                                                    |
| TGME49_269750 | -7.63 | 4.49 | 0.0019585 | 0.0197412 | CrcB family protein                                                                     |
| TGME49_211400 | -7.61 | 4.49 | 0.0019694 | 0.0198243 | DEAD/DEAH box helicase domain-containing protein                                        |
| TGME49_222160 | 1.75  | 5.27 | 0.0019933 | 0.0199876 | aldehyde dehydrogenase                                                                  |
| TGME49_314295 | 2.11  | 5.01 | 0.0020681 | 0.0205768 | ribosomal l25 family protein                                                            |
| TGME49_254280 | 2.32  | 5.22 | 0.0021148 | 0.0209724 | DNA-directed RNA polymerase III RPC9                                                    |
| TGME49_267670 | -7.58 | 5.25 | 0.002116  | 0.0209724 | hypothetical protein                                                                    |

|               |       |      |           |           |                                                                                           |
|---------------|-------|------|-----------|-----------|-------------------------------------------------------------------------------------------|
| TGME49_268340 | 2.13  | 4.37 | 0.0021654 | 0.0213531 | glycosyltransferase family 28 C-terminal domain-containing protein                        |
| TGME49_314920 | -7.87 | 4.87 | 0.0021915 | 0.0214971 | hypothetical protein                                                                      |
| TGME49_266870 | -7.38 | 4.48 | 0.0022165 | 0.0216755 | transporter, major facilitator family protein                                             |
| TGME49_313273 | -7.84 | 5.06 | 0.00222   | 0.0216755 | hypothetical protein                                                                      |
| TGME49_277050 | -7.26 | 4.58 | 0.0022267 | 0.0216807 | hypothetical protein                                                                      |
| TGME49_291010 | -7.55 | 4.59 | 0.0023266 | 0.0224558 | hypothetical protein                                                                      |
| TGME49_320680 | -7.24 | 4.71 | 0.002411  | 0.0229693 | AP2 domain transcription factor AP2IV-2                                                   |
| TGME49_204055 | -7.60 | 4.62 | 0.0024155 | 0.0229693 | hypothetical protein                                                                      |
| TGME49_297495 | -6.99 | 4.35 | 0.0024403 | 0.0231702 | hypothetical protein                                                                      |
| TGME49_211695 | -7.00 | 4.79 | 0.002465  | 0.0232685 | hypothetical protein                                                                      |
| TGME49_262510 | -7.33 | 4.36 | 0.0024853 | 0.0234028 | GTP-binding protein engB, putative                                                        |
| TGME49_223580 | -7.81 | 4.76 | 0.0025759 | 0.0239356 | mediator complex subunit MED4                                                             |
| TGME49_249930 | -7.03 | 4.51 | 0.0026156 | 0.0242125 | hypothetical protein                                                                      |
| TGME49_286550 | 1.37  | 5.61 | 0.0026182 | 0.0242125 | hypothetical protein                                                                      |
| TGME49_261410 | -7.58 | 4.35 | 0.0026238 | 0.0242353 | protein-tyrosine-phosphatase                                                              |
| TGME49_301160 | -7.44 | 4.71 | 0.0026314 | 0.024272  | SAG-related sequence SRS19C                                                               |
| TGME49_261030 | -7.65 | 4.56 | 0.0026341 | 0.024272  | pyridine nucleotide-disulfide oxidoreductase domain-containing protein                    |
| TGME49_274120 | 1.07  | 6.42 | 0.0026646 | 0.0244363 | hypothetical protein                                                                      |
| TGME49_213635 | 2.41  | 5.89 | 0.0027146 | 0.0246902 | hypothetical protein                                                                      |
| TGME49_205110 | -7.19 | 4.59 | 0.0027214 | 0.0247224 | hypothetical protein                                                                      |
| TGME49_323320 | -7.24 | 5.12 | 0.0027838 | 0.0250836 | hypothetical protein                                                                      |
| TGME49_216840 | -7.25 | 4.42 | 0.0028127 | 0.0252915 | hypothetical protein                                                                      |
| TGME49_257980 | -7.57 | 4.79 | 0.0028134 | 0.0252915 | ribosome recycling factor protein                                                         |
| TGME49_271190 | -7.37 | 4.36 | 0.0028708 | 0.0256547 | bicoid-interacting protein BIN3                                                           |
| TGME49_236140 | -7.22 | 4.58 | 0.0030213 | 0.0265432 | hypothetical protein                                                                      |
| TGME49_291330 | 1.08  | 7.23 | 0.0030644 | 0.0268601 | RNA recognition motif-containing protein                                                  |
| TGME49_258420 | -4.66 | 5.57 | 0.0031086 | 0.0270335 | hypothetical protein                                                                      |
| TGME49_270630 | -7.29 | 4.51 | 0.0031264 | 0.0271271 | hypothetical protein                                                                      |
| TGME49_262680 | -6.86 | 4.41 | 0.0031357 | 0.0271432 | hypothetical protein                                                                      |
| TGME49_219720 | 1.15  | 6.60 | 0.0031388 | 0.0271432 | Ras-related protein Rab-5C, putative                                                      |
| TGME49_308930 | 1.34  | 6.31 | 0.0032033 | 0.0275778 | 50S ribosomal protein L33, putative                                                       |
| TGME49_329100 | -7.28 | 4.45 | 0.003252  | 0.0279033 | Toxoplasma gondii family C protein                                                        |
| TGME49_244580 | -7.43 | 4.45 | 0.0032721 | 0.027944  | L1P family of ribosomal protein                                                           |
| TGME49_255870 | -7.37 | 4.35 | 0.0032754 | 0.027944  | WD domain, G-beta repeat-containing protein                                               |
| TGME49_216190 | -7.43 | 4.52 | 0.0032966 | 0.027944  | hypothetical protein                                                                      |
| TGME49_254140 | -6.57 | 4.37 | 0.0033503 | 0.0281838 | DNA-directed RNA polymerase II RPABC4                                                     |
| TGME49_313090 | -7.45 | 4.70 | 0.0033659 | 0.0282844 | hypothetical protein                                                                      |
| TGME49_210770 | -7.39 | 4.36 | 0.003382  | 0.0283893 | hypothetical protein                                                                      |
| TGME49_226100 | -7.32 | 5.21 | 0.0035371 | 0.0291995 | haloacid dehalogenase family hydrolase domain-containing protein                          |
| TGME49_230830 | 1.42  | 6.09 | 0.0035493 | 0.0292219 | ATPase family associated with various cellular activities (AAA) domain-containing protein |
| TGME49_271290 | -7.33 | 4.59 | 0.0035583 | 0.0292343 | hypothetical protein                                                                      |
| TGME49_273540 | -7.60 | 4.73 | 0.0036445 | 0.0298765 | phosphatidylserine synthase, putative                                                     |
| TGME49_320580 | -7.38 | 4.40 | 0.0036687 | 0.0299814 | hypothetical protein                                                                      |
| TGME49_268985 | -7.07 | 4.36 | 0.0037098 | 0.0301269 | hypothetical protein                                                                      |
| TGME49_262430 | 1.19  | 6.47 | 0.003721  | 0.0301858 | 4-hydroxy-3-methylbut-2-en-1-yl diphosphate synthase                                      |
| TGME49_239310 | 1.33  | 5.65 | 0.0037359 | 0.0302431 | ribulose 5-phosphate isomerase                                                            |
| TGME49_234510 | 1.01  | 6.86 | 0.0037592 | 0.0303683 | ankyrin repeat-containing protein                                                         |
| TGME49_253680 | -7.15 | 4.57 | 0.003791  | 0.0305293 | hypothetical protein                                                                      |
| TGME49_225360 | -7.78 | 4.57 | 0.003881  | 0.0310275 | hypothetical protein                                                                      |
| TGME49_318880 | -7.09 | 4.84 | 0.0039113 | 0.0312375 | hypothetical protein                                                                      |
| TGME49_244430 | -7.77 | 4.79 | 0.0039444 | 0.0312702 | pseudouridylate synthase, putative                                                        |
| TGME49_263323 | -7.32 | 4.34 | 0.0039518 | 0.0312702 | tetratricopeptide repeat protein 11, putative                                             |
| TGME49_264420 | -7.53 | 5.00 | 0.0041327 | 0.032303  | lipoprotein, putative                                                                     |
| TGME49_275470 | -7.33 | 4.92 | 0.0041528 | 0.032332  | dense granule protein GRA15                                                               |
| TGME49_220212 | -7.25 | 4.42 | 0.0043016 | 0.033095  | pseudouridine synthase                                                                    |

|               |       |      |           |           |                                                            |
|---------------|-------|------|-----------|-----------|------------------------------------------------------------|
| TGME49_263430 | -7.50 | 4.44 | 0.0043566 | 0.0334132 | 3-hydroxyisobutyrate dehydrogenase                         |
| TGME49_207970 | -7.09 | 4.39 | 0.0046183 | 0.0348335 | HEAT repeat-containing protein                             |
| TGME49_254260 | 1.66  | 4.71 | 0.0047217 | 0.0354746 | COX19 cytochrome c oxidase assembly family protein         |
| TGME49_289900 | -7.04 | 4.43 | 0.0047322 | 0.0355193 | n-acetyltransferase family protein                         |
| TGME49_272370 | 1.03  | 8.31 | 0.0047662 | 0.0356358 | hypothetical protein                                       |
| TGME49_316610 | -7.62 | 4.67 | 0.0048161 | 0.0359392 | hypothetical protein                                       |
| TGME49_271250 | -7.50 | 4.45 | 0.0049018 | 0.0364736 | hypothetical protein                                       |
| TGME49_323110 | 1.23  | 6.57 | 0.0049629 | 0.0368215 | hypothetical protein                                       |
| TGME49_201840 | 1.04  | 7.40 | 0.005109  | 0.0377967 | aspartyl protease ASP1                                     |
| TGME49_312680 | 1.54  | 4.40 | 0.0051626 | 0.0380118 | 60S ribosomal protein L27, putative                        |
| TGME49_233930 | -7.30 | 4.47 | 0.0052027 | 0.0382336 | CAF1 family ribonuclease                                   |
| TGME49_306455 | 2.46  | 4.82 | 0.005421  | 0.0393198 | hypothetical protein                                       |
| TGME49_223725 | -7.40 | 4.70 | 0.0055391 | 0.0399466 | hypothetical protein                                       |
| TGME49_209490 | 1.17  | 6.16 | 0.0057731 | 0.0411735 | hypothetical protein                                       |
| TGME49_258900 | 1.36  | 5.48 | 0.0058558 | 0.0414574 | hypothetical protein                                       |
| TGME49_222155 | -6.92 | 4.39 | 0.0059128 | 0.0417839 | hypothetical protein                                       |
| TGME49_290630 | 1.29  | 5.88 | 0.006016  | 0.0422817 | AP2 domain transcription factor AP2IX-7                    |
| TGME49_269417 | -7.03 | 4.43 | 0.0060976 | 0.042777  | hypothetical protein                                       |
| TGME49_207470 | -7.26 | 4.39 | 0.0063103 | 0.043852  | hypothetical protein                                       |
| TGME49_210800 | 1.23  | 6.12 | 0.0063132 | 0.043852  | activator of hsp90 ATPase, putative                        |
| TGME49_267580 | 1.04  | 7.15 | 0.0064424 | 0.0445642 | cyclin2 related protein                                    |
| TGME49_250500 | -7.08 | 4.89 | 0.0064611 | 0.0445991 | hypothetical protein                                       |
| TGME49_213460 | 1.08  | 7.26 | 0.0065283 | 0.0449614 | hypothetical protein                                       |
| TGME49_233130 | 1.30  | 5.80 | 0.0065939 | 0.0453056 | nucleoside transporter protein                             |
| TGME49_207070 | 2.47  | 4.76 | 0.006761  | 0.0460114 | glycosyl transferase, putative                             |
| TGME49_257740 | 1.11  | 6.52 | 0.0068932 | 0.0468286 | UMP-CMP kinase                                             |
| TGME49_263410 | 2.78  | 4.51 | 0.0069213 | 0.0469357 | scavenger receptor cysteine-rich domain-containing protein |
| TGME49_234460 | 1.01  | 6.92 | 0.0071892 | 0.0482398 | hypothetical protein                                       |
| TGME49_244260 | -7.47 | 4.72 | 0.0075131 | 0.0499575 | hypothetical protein                                       |

**Supplementary Table S3C: Differential *T. gondii* gene expression analysis of human HFF cells infected with *T. gondii* EGS strain for 48 hours compared to the average *T. gondii* gene expression of human MM6 and neuronal stem cells infected with either GT1, ME49 or VEG strains of *T. gondii* for 18 hours.**

| gene ID       | logFC | logCPM | PValue    | FDR       | Product name                                                          |
|---------------|-------|--------|-----------|-----------|-----------------------------------------------------------------------|
| TGME49_462910 | 11.89 | 7.86   | 3.02E-142 | 2.34E-138 | large subunit ribosomal RNA                                           |
| TGME49_457990 | 14.29 | 11.10  | 1.90E-114 | 7.36E-111 | 28S ribosomal RNA                                                     |
| TGME49_280570 | 6.48  | 8.90   | 1.67E-109 | 4.31E-106 | SAG-related sequence SRS35A                                           |
| TGME49_200010 | 10.81 | 6.04   | 1.23E-80  | 2.39E-77  | hypothetical protein                                                  |
| TGME49_205250 | 4.15  | 9.76   | 2.56E-77  | 3.96E-74  | rhopty protein ROP18                                                  |
| TGME49_207210 | 4.91  | 7.68   | 3.88E-47  | 5.00E-44  | hypothetical protein                                                  |
| TGME49_291040 | 5.12  | 7.28   | 9.57E-44  | 1.06E-40  | lactate dehydrogenase LDH2                                            |
| TGME49_209755 | 5.58  | 7.50   | 1.56E-40  | 1.50E-37  | hypothetical protein                                                  |
| TGME49_323400 | 4.59  | 8.61   | 2.99E-38  | 2.57E-35  | cytochrome c oxidase subunit iii subfamily protein                    |
| TGME49_214080 | 3.46  | 9.15   | 7.52E-34  | 5.82E-31  | toxofilin                                                             |
| TGME49_259020 | 5.87  | 7.36   | 7.52E-32  | 5.29E-29  | bradyzoite antigen BAG1                                               |
| TGME49_221840 | 4.38  | 5.63   | 1.01E-31  | 6.52E-29  | hypothetical protein                                                  |
| TGME49_237130 | 4.35  | 9.60   | 4.84E-30  | 2.88E-27  | cytochrome b, putative                                                |
| TGME49_278080 | 4.54  | 5.97   | 3.08E-29  | 1.70E-26  | Toxoplasma gondii family A protein                                    |
| TGME49_330000 | 4.62  | 9.57   | 1.34E-28  | 6.89E-26  | cytochrome b                                                          |
| TGME49_252640 | 5.81  | 6.77   | 2.04E-28  | 9.85E-26  | P-type ATPase PMA1                                                    |
| TGME49_301250 | 3.67  | 14.08  | 2.90E-27  | 1.32E-24  | hypothetical protein                                                  |
| TGME49_268860 | 5.65  | 5.85   | 1.94E-25  | 8.31E-23  | enolase 1                                                             |
| TGME49_293790 | 3.95  | 6.58   | 2.20E-25  | 8.94E-23  | hypothetical protein                                                  |
| TGME49_202020 | 3.30  | 8.16   | 2.64E-25  | 1.02E-22  | DnAK-TPR                                                              |
| TGME49_252070 | 4.63  | 5.64   | 1.49E-21  | 5.50E-19  | KRUF family protein                                                   |
| TGME49_207160 | 4.66  | 7.01   | 4.42E-21  | 1.55E-18  | SAG-related sequence SRS49D                                           |
| TGME49_321480 | 4.55  | 5.82   | 2.88E-18  | 9.25E-16  | SAG-related sequence SRS12B                                           |
| TGME49_260310 | 3.09  | 6.15   | 3.11E-18  | 9.26E-16  | ATP-binding cassette transporter ABC.B1                               |
| TGME49_206550 | 3.33  | 6.24   | 4.16E-18  | 1.19E-15  | hypothetical protein                                                  |
| TGME49_243470 | 4.67  | 4.96   | 1.38E-17  | 3.78E-15  | hypothetical protein                                                  |
| TGME49_216140 | 2.49  | 7.81   | 1.87E-16  | 4.83E-14  | tetratricopeptide repeat-containing protein                           |
| TGME49_305460 | 2.50  | 7.84   | 4.49E-16  | 1.12E-13  | methionine aminopeptidase 2, putative                                 |
| TGME49_253100 | 1.81  | 7.65   | 2.78E-15  | 6.72E-13  | hypothetical protein                                                  |
| TGME49_227430 | 2.76  | 6.42   | 5.87E-15  | 1.37E-12  | transmembrane amino acid transporter protein                          |
| TGME49_254460 | 1.98  | 7.76   | 7.95E-15  | 1.81E-12  | hypothetical protein                                                  |
| TGME49_287460 | 3.13  | 5.08   | 8.89E-15  | 1.96E-12  | hypothetical protein                                                  |
| TGME49_222370 | 1.97  | 7.44   | 2.20E-14  | 4.72E-12  | SAG-related sequence SRS13                                            |
| TGME49_225290 | 3.06  | 6.51   | 2.52E-14  | 5.27E-12  | GDA1/CD39 (nucleoside phosphatase) family protein                     |
| TGME49_253330 | 2.64  | 8.53   | 3.93E-14  | 7.99E-12  | Rhoptry kinase family protein, truncated (incomplete catalytic triad) |
| TGME49_255060 | 3.30  | 9.20   | 4.31E-14  | 8.54E-12  | cytochrome b(N-terminal)/b6/petB subfamily protein                    |
| TGME49_315100 | 3.91  | 5.66   | 1.56E-13  | 2.94E-11  | hypothetical protein                                                  |
| TGME49_280580 | 2.66  | 6.00   | 4.74E-12  | 8.72E-10  | SAG-related sequence SRS35B                                           |
| TGME49_268230 | -9.26 | 5.82   | 2.59E-11  | 4.66E-09  | hypothetical protein                                                  |
| TGME49_254520 | 1.88  | 7.59   | 4.93E-11  | 8.66E-09  | mediator complex subunit MED11                                        |
| TGME49_254080 | 1.41  | 8.07   | 7.26E-11  | 1.22E-08  | metal cation transporter, ZIP family protein                          |
| TGME49_275750 | 1.80  | 7.30   | 6.15E-10  | 9.70E-08  | small nuclear ribonucleoprotein E, putative                           |
| TGME49_299030 | 1.73  | 7.72   | 8.40E-10  | 1.27E-07  | RNA recognition motif 2 protein                                       |
| TGME49_232035 | -4.53 | 5.47   | 1.04E-09  | 1.55E-07  | hypothetical protein                                                  |
| TGME49_253880 | 1.45  | 8.09   | 1.13E-09  | 1.65E-07  | GNS1/SUR4 family protein                                              |
| TGME49_253790 | 1.53  | 7.52   | 1.35E-09  | 1.88E-07  | zinc finger (CCCH type) motif-containing protein                      |
| TGME49_293252 | 4.86  | 5.29   | 1.58E-09  | 2.14E-07  | hypothetical protein                                                  |
| TGME49_276940 | 1.41  | 8.43   | 1.69E-09  | 2.25E-07  | ribosome associated membrane protein RAMP4, putative                  |

|               |       |       |          |           |                                                                  |
|---------------|-------|-------|----------|-----------|------------------------------------------------------------------|
| TGME49_293840 | 2.10  | 6.76  | 2.73E-09 | 3.48E-07  | hypothetical protein                                             |
| TGME49_268225 | -7.05 | 6.16  | 2.76E-09 | 3.48E-07  | hypothetical protein                                             |
| TGME49_293780 | 1.90  | 7.63  | 2.79E-09 | 3.48E-07  | hypothetical protein                                             |
| TGME49_312105 | -5.44 | 5.62  | 3.68E-09 | 4.38E-07  | hypothetical protein                                             |
| TGME49_254630 | 1.64  | 7.14  | 4.37E-09 | 4.97E-07  | CMGC kinase                                                      |
| TGME49_271320 | 3.07  | 4.81  | 4.84E-09 | 5.42E-07  | hypothetical protein                                             |
| TGME49_217750 | -4.62 | 5.70  | 9.05E-09 | 9.85E-07  | hypothetical protein                                             |
| TGME49_290970 | 2.50  | 7.40  | 9.77E-09 | 1.05E-06  | 8-amino-7-oxononanoate synthase                                  |
| TGME49_312160 | 1.57  | 8.48  | 2.70E-08 | 2.78E-06  | hypothetical protein                                             |
| TGME49_298980 | 1.58  | 7.26  | 5.09E-08 | 4.86E-06  | RNA pseudouridine synthase superfamily protein                   |
| TGME49_321170 | 2.39  | 5.58  | 6.97E-08 | 6.49E-06  | Toxoplasma gondii family C protein                               |
| TGME49_228980 | -4.97 | 4.76  | 7.79E-08 | 7.00E-06  | hypothetical protein                                             |
| TGME49_248740 | 1.82  | 8.90  | 8.97E-08 | 7.97E-06  | hypothetical protein                                             |
| TGME49_296340 | 2.84  | 5.50  | 9.58E-08 | 8.42E-06  | hypothetical protein                                             |
| TGME49_208590 | 1.30  | 7.67  | 1.04E-07 | 8.98E-06  | vacuolar ATP synthase subunit 54kD, putative                     |
| TGME49_254365 | 1.44  | 7.90  | 2.03E-07 | 1.68E-05  | phosphatidate cytidyltransferase                                 |
| TGME49_313900 | 2.08  | 6.92  | 2.82E-07 | 2.29E-05  | non-specific serine/threonine protein kinase                     |
| TGME49_308020 | 1.10  | 8.94  | 2.90E-07 | 2.31E-05  | SAG-related sequence SRS57                                       |
| TGME49_254920 | 2.48  | 5.18  | 2.90E-07 | 2.31E-05  | hypothetical protein                                             |
| TGME49_253470 | 1.44  | 7.73  | 3.11E-07 | 2.43E-05  | alveolin domain containing intermediate filament IMC13           |
| TGME49_209985 | 1.97  | 6.55  | 3.11E-07 | 2.43E-05  | cAMP-dependent protein kinase                                    |
| TGME49_229990 | 1.15  | 8.03  | 4.48E-07 | 3.30E-05  | T-complex protein 1 subunit alpha, putative                      |
| TGME49_268170 | -4.39 | 5.04  | 5.00E-07 | 3.63E-05  | hypothetical protein                                             |
| TGME49_315220 | 1.15  | 8.41  | 5.03E-07 | 3.63E-05  | rhopty protein ROP14                                             |
| TGME49_270320 | 1.34  | 8.41  | 5.96E-07 | 4.27E-05  | protein phosphatase 2C domain-containing protein                 |
| TGME49_263215 | -4.51 | 4.62  | 6.32E-07 | 4.43E-05  | hypothetical protein                                             |
| TGME49_232410 | 1.14  | 9.84  | 6.36E-07 | 4.43E-05  | PDI family protein                                               |
| TGME49_290700 | 1.15  | 8.51  | 6.45E-07 | 4.45E-05  | hypothetical protein                                             |
| TGME49_310060 | 1.98  | 6.19  | 7.64E-07 | 5.20E-05  | small nuclease                                                   |
| TGME49_264240 | -4.81 | 5.23  | 8.57E-07 | 5.76E-05  | hypothetical protein                                             |
| TGME49_288475 | 3.34  | 6.01  | 1.24E-06 | 8.17E-05  | hypothetical protein                                             |
| TGME49_261740 | 1.29  | 11.35 | 1.37E-06 | 8.85E-05  | hypothetical protein                                             |
| TGME49_285710 | 1.72  | 6.33  | 1.38E-06 | 8.85E-05  | hypothetical protein                                             |
| TGME49_258820 | 1.48  | 8.23  | 1.58E-06 | 9.86E-05  | hypothetical protein                                             |
| TGME49_299200 | 1.55  | 7.12  | 1.61E-06 | 9.96E-05  | Bet3 transport protein, putative                                 |
| TGME49_247770 | 1.08  | 8.12  | 1.68E-06 | 0.0001028 | hypothetical protein                                             |
| TGME49_254690 | 1.20  | 8.49  | 1.82E-06 | 0.0001105 | phospholipase/carboxylesterase                                   |
| TGME49_223900 | 2.97  | 5.26  | 2.28E-06 | 0.0001333 | hypothetical protein                                             |
| TGME49_276140 | 1.13  | 9.71  | 2.76E-06 | 0.0001558 | ADP ribosylation factor ARF1                                     |
| TGME49_221220 | 2.66  | 5.26  | 2.87E-06 | 0.0001606 | hypothetical protein                                             |
| TGME49_268730 | 1.94  | 5.79  | 3.06E-06 | 0.0001689 | glutaredoxin-related protein                                     |
| TGME49_207830 | 1.54  | 6.50  | 3.66E-06 | 0.0001964 | MORN repeat-containing protein                                   |
| TGME49_315250 | 1.54  | 6.28  | 4.04E-06 | 0.0002122 | GAMM1 protein, putative                                          |
| TGME49_275860 | 1.07  | 9.69  | 4.17E-06 | 0.0002148 | hypothetical protein                                             |
| TGME49_262590 | -5.38 | 5.01  | 4.59E-06 | 0.0002334 | hypothetical protein                                             |
| TGME49_232955 | -5.63 | 10.84 | 4.62E-06 | 0.0002335 | hypothetical protein                                             |
| TGME49_254400 | 2.00  | 5.74  | 4.71E-06 | 0.0002366 | LSU ribosomal protein L2P, putative                              |
| TGME49_252880 | 1.68  | 7.59  | 4.87E-06 | 0.0002428 | hypothetical protein                                             |
| TGME49_299070 | 1.47  | 6.85  | 4.95E-06 | 0.0002456 | pyruvate kinase PyKII                                            |
| TGME49_239500 | 1.30  | 8.04  | 5.03E-06 | 0.0002476 | proteasome subunit alpha type, putative                          |
| TGME49_314250 | 2.65  | 5.27  | 5.88E-06 | 0.0002807 | bradyzoite rhopty protein BRP1                                   |
| TGME49_319550 | 1.10  | 7.84  | 6.05E-06 | 0.0002869 | membrane protein C17G8.08c, putative                             |
| TGME49_226100 | -7.32 | 5.21  | 6.43E-06 | 0.0002994 | haloacid dehalogenase family hydrolase domain-containing protein |
| TGME49_253000 | 1.20  | 7.09  | 7.72E-06 | 0.0003509 | ELMO/CED-12 family protein                                       |
| TGME49_254000 | 1.21  | 7.49  | 8.99E-06 | 0.0003994 | hypothetical protein                                             |
| TGME49_299990 | 1.46  | 5.96  | 1.03E-05 | 0.0004493 | archease family protein                                          |
| TGME49_260870 | 2.09  | 5.93  | 1.09E-05 | 0.0004715 | zinc finger cdgsh type protein                                   |

|               |       |      |           |           |                                                                    |
|---------------|-------|------|-----------|-----------|--------------------------------------------------------------------|
| TGME49_260430 | 2.41  | 5.07 | 1.32E-05  | 0.0005475 | hypothetical protein                                               |
| TGME49_276210 | 1.17  | 7.27 | 1.35E-05  | 0.0005564 | phosphoglycerate mutase family protein                             |
| TGME49_262050 | 1.18  | 9.45 | 1.46E-05  | 0.0005956 | rhoptry kinase family protein ROP39                                |
| TGME49_226755 | 1.30  | 6.78 | 1.51E-05  | 0.0006155 | 3'5'-cyclic nucleotide phosphodiesterase domain-containing protein |
| TGME49_218270 | 1.22  | 7.71 | 1.57E-05  | 0.0006341 | hypothetical protein                                               |
| TGME49_252440 | 2.11  | 4.64 | 1.58E-05  | 0.0006343 | peptidase c13 family protein                                       |
| TGME49_239490 | 1.14  | 8.37 | 1.66E-05  | 0.0006524 | dehydrogenase E1 component family protein                          |
| TGME49_209850 | 1.51  | 7.19 | 1.79E-05  | 0.0006974 | RNA recognition motif-containing protein                           |
| TGME49_249780 | 1.09  | 7.77 | 1.81E-05  | 0.0007034 | hypothetical protein                                               |
| TGME49_254570 | 1.21  | 7.56 | 1.88E-05  | 0.0007169 | hypothetical protein                                               |
| TGME49_208850 | 2.67  | 6.23 | 1.92E-05  | 0.0007232 | SAG-related sequence SRS11                                         |
| TGME49_211010 | 1.79  | 7.49 | 2.04E-05  | 0.0007662 | hypothetical protein                                               |
| TGME49_278020 | 1.86  | 5.35 | 2.26E-05  | 0.0008314 | hypothetical protein                                               |
| TGME49_225050 | 1.06  | 7.72 | 2.32E-05  | 0.0008489 | adenosylhomocysteinase, putative                                   |
| TGME49_283790 | 1.50  | 6.66 | 2.37E-05  | 0.0008592 | protein kinase, putative                                           |
| TGME49_292260 | 3.28  | 4.64 | 2.39E-05  | 0.000862  | SAG-related sequence SRS36B                                        |
| TGME49_252190 | 1.56  | 6.82 | 2.43E-05  | 0.0008739 | KRUF family protein                                                |
| TGME49_312600 | 1.07  | 8.45 | 2.45E-05  | 0.0008739 | heat shock protein HSP21                                           |
| TGME49_202025 | 2.76  | 4.49 | 2.64E-05  | 0.0009358 | hypothetical protein                                               |
| TGME49_254410 | 1.30  | 7.01 | 2.69E-05  | 0.0009484 | protein phosphatase 2C, putative                                   |
| TGME49_276220 | 1.53  | 6.43 | 3.01E-05  | 0.001043  | hypothetical protein                                               |
| TGME49_287040 | 1.15  | 7.28 | 3.25E-05  | 0.0011012 | hypothetical protein                                               |
| TGME49_310520 | 1.52  | 5.61 | 3.46E-05  | 0.0011564 | 3'5'-cyclic nucleotide phosphodiesterase domain-containing protein |
| TGME49_205050 | -5.06 | 5.33 | 3.51E-05  | 0.0011701 | hypothetical protein                                               |
| TGME49_254380 | 1.62  | 5.84 | 3.95E-05  | 0.0012872 | ribosomal protein L11, putative                                    |
| TGME49_320515 | 1.15  | 7.08 | 4.28E-05  | 0.0013551 | hypothetical protein                                               |
| TGME49_215960 | 1.03  | 9.11 | 4.90E-05  | 0.0015346 | hypothetical protein                                               |
| TGME49_217160 | 2.35  | 5.01 | 5.26E-05  | 0.001639  | Der1 family protein                                                |
| TGME49_246930 | 1.29  | 7.67 | 6.29E-05  | 0.0018994 | calmodulin CAM1                                                    |
| TGME49_300990 | 1.84  | 5.19 | 6.36E-05  | 0.0019129 | Toxoplasma gondii family C protein                                 |
| TGME49_311230 | 1.03  | 9.71 | 7.26E-05  | 0.0021121 | hypothetical protein                                               |
| TGME49_207970 | -5.26 | 4.39 | 7.86E-05  | 0.0022268 | HEAT repeat-containing protein                                     |
| TGME49_290678 | 1.70  | 6.76 | 8.00E-05  | 0.0022581 | hypothetical protein                                               |
| TGME49_213820 | 1.16  | 7.05 | 8.85E-05  | 0.0024611 | hypothetical protein                                               |
| TGME49_258550 | 1.79  | 6.28 | 8.94E-05  | 0.0024767 | SAG-related sequence SRS28                                         |
| TGME49_236990 | 1.74  | 5.87 | 9.11E-05  | 0.0025146 | beta-ketoacyl synthase, N-terminal domain-containing protein       |
| TGME49_242118 | -4.57 | 5.24 | 9.47E-05  | 0.0026059 | myosin-light-chain kinase                                          |
| TGME49_259700 | 1.14  | 7.11 | 9.71E-05  | 0.0026626 | hypothetical protein                                               |
| TGME49_248450 | 1.22  | 6.38 | 9.93E-05  | 0.0027125 | zinc finger, C3HC4 type (RING finger) domain-containing protein    |
| TGME49_288880 | 2.14  | 4.68 | 0.0001064 | 0.002865  | hypothetical protein                                               |
| TGME49_260480 | 1.80  | 5.57 | 0.0001079 | 0.0028857 | leucine rich repeat-containing protein                             |
| TGME49_311490 | 2.49  | 4.65 | 0.0001089 | 0.0028937 | hypothetical protein                                               |
| TGME49_285720 | 1.70  | 5.25 | 0.0001097 | 0.0028941 | ATP binding protein, putative                                      |
| TGME49_213460 | 1.36  | 7.26 | 0.0001097 | 0.0028941 | hypothetical protein                                               |
| TGME49_288870 | 1.95  | 4.96 | 0.0001199 | 0.0031013 | hypothetical protein                                               |
| TGME49_289090 | 2.52  | 4.72 | 0.0001218 | 0.0031391 | hypothetical protein                                               |
| TGME49_254390 | 1.21  | 7.74 | 0.0001226 | 0.0031499 | CRAL/TRIO domain-containing protein                                |
| TGME49_285510 | 1.03  | 7.63 | 0.0001291 | 0.003293  | hypothetical protein                                               |
| TGME49_264660 | 1.29  | 9.56 | 0.0001361 | 0.0034509 | SAG-related sequence SRS44                                         |
| TGME49_215540 | -6.53 | 4.49 | 0.0001403 | 0.0035208 | hypothetical protein                                               |
| TGME49_313440 | 1.66  | 8.63 | 0.0001847 | 0.0044769 | hypothetical protein                                               |
| TGME49_266740 | 1.93  | 5.45 | 0.000186  | 0.0044934 | RNA recognition motif-containing protein                           |
| TGME49_253970 | 1.91  | 4.68 | 0.0001869 | 0.0045006 | hypothetical protein                                               |
| TGME49_223095 | 2.42  | 4.37 | 0.0002005 | 0.0047684 | hypothetical protein                                               |



|               |       |       |           |           |                                                                                      |
|---------------|-------|-------|-----------|-----------|--------------------------------------------------------------------------------------|
| TGME49_215750 | 2.18  | 4.88  | 0.0002022 | 0.0047959 | cytidine and deoxycytidylate deaminase zinc-binding region domain-containing protein |
| TGME49_245475 | 1.73  | 5.61  | 0.0002541 | 0.0057776 | hypothetical protein                                                                 |
| TGME49_275870 | 1.43  | 6.07  | 0.0002993 | 0.0066299 | tubulin/FtsZ family, GTPase domain-containing protein                                |
| TGME49_308930 | 1.46  | 6.31  | 0.0003092 | 0.0067915 | 50S ribosomal protein L33, putative                                                  |
| TGME49_270560 | 1.90  | 4.63  | 0.0003175 | 0.0069545 | peptidyl-prolyl cis-trans isomerase family 1                                         |
| TGME49_232550 | 1.18  | 7.77  | 0.0003311 | 0.0071908 | hypothetical protein                                                                 |
| TGME49_257685 | 1.16  | 7.60  | 0.0003497 | 0.0075106 | hypothetical protein                                                                 |
| TGME49_232640 | 1.57  | 5.52  | 0.0003847 | 0.0081151 | RNA 2'-phosphotransferase, Tpt1/KptA family protein                                  |
| TGME49_249480 | 1.21  | 6.66  | 0.0003944 | 0.0082861 | tetratricopeptide repeat-containing protein                                          |
| TGME49_275770 | 1.18  | 6.36  | 0.0004123 | 0.0085909 | hypothetical protein                                                                 |
| TGME49_315260 | -4.45 | 4.43  | 0.0004197 | 0.0087225 | alanine dehydrogenase                                                                |
| TGME49_307820 | 1.33  | 6.37  | 0.0004367 | 0.0089557 | hypothetical protein                                                                 |
| TGME49_208730 | 1.06  | 8.82  | 0.0004414 | 0.0089816 | microneme protein, putative                                                          |
| TGME49_298970 | 1.05  | 7.13  | 0.0004469 | 0.0090505 | LSM3, U6 small nuclear RNA associated isoform 2 family protein                       |
| TGME49_277260 | 1.08  | 10.15 | 0.0004764 | 0.0095409 | hypothetical protein                                                                 |
| TGME49_257350 | 1.09  | 8.63  | 0.0004881 | 0.0097499 | eukaryotic translation initiation factor, putative                                   |
| TGME49_270260 | 2.03  | 4.99  | 0.0004964 | 0.0098485 | hypothetical protein                                                                 |
| TGME49_251180 | 1.09  | 6.82  | 0.0004991 | 0.0098485 | KRUF family protein                                                                  |
| TGME49_309130 | 2.10  | 5.09  | 0.0005346 | 0.0104098 | hypothetical protein                                                                 |
| TGME49_306640 | 1.55  | 6.29  | 0.0005476 | 0.0105818 | hypothetical protein                                                                 |
| TGME49_214575 | 1.31  | 6.21  | 0.0005808 | 0.0110176 | hypothetical protein                                                                 |
| TGME49_252290 | 1.33  | 7.47  | 0.0006241 | 0.0116834 | importin alpha, putative                                                             |
| TGME49_286560 | 1.58  | 6.07  | 0.0006436 | 0.0119897 | U6 snRNA-associated Sm family protein                                                |
| TGME49_225470 | 1.32  | 6.33  | 0.0007319 | 0.0132196 | peptide methionine sulfoxide reductase                                               |
| TGME49_299980 | 1.08  | 7.50  | 0.000761  | 0.0136499 | hypothetical protein                                                                 |
| TGME49_229500 | 1.54  | 6.14  | 0.000772  | 0.0137844 | hypothetical protein                                                                 |
| TGME49_257160 | 1.02  | 7.33  | 0.0008212 | 0.0143774 | hypothetical protein                                                                 |
| TGME49_226068 | 1.08  | 6.67  | 0.0008776 | 0.0150822 | DnaJ domain-containing protein                                                       |
| TGME49_233695 | 1.09  | 6.72  | 0.0009198 | 0.015595  | hypothetical protein                                                                 |
| TGME49_230100 | 1.63  | 5.78  | 0.0009601 | 0.0161712 | membrane protein, putative                                                           |
| TGME49_219660 | 2.21  | 4.74  | 0.000976  | 0.0162963 | hypothetical protein                                                                 |
| TGME49_231000 | 1.28  | 6.28  | 0.001028  | 0.0169098 | START domain-containing protein                                                      |
| TGME49_305990 | 1.67  | 5.91  | 0.0010349 | 0.0169367 | hypothetical protein                                                                 |
| TGME49_223610 | 1.63  | 6.77  | 0.0010384 | 0.0169367 | hypothetical protein                                                                 |
| TGME49_204520 | 1.45  | 5.24  | 0.0010408 | 0.01694   | hypothetical protein                                                                 |
| TGME49_218810 | 1.22  | 6.03  | 0.0010561 | 0.0170552 | histidyl-tRNA synthetase                                                             |
| TGME49_250220 | 1.36  | 6.34  | 0.0011201 | 0.017698  | hypothetical protein                                                                 |
| TGME49_276130 | 1.13  | 6.83  | 0.0011217 | 0.017698  | cathepsin CPC2                                                                       |
| TGME49_271090 | 1.87  | 4.91  | 0.0011372 | 0.0178335 | hypothetical protein                                                                 |
| TGME49_249890 | 1.73  | 5.18  | 0.0011841 | 0.0184567 | hypothetical protein                                                                 |
| TGME49_243980 | 1.48  | 5.21  | 0.0012235 | 0.0189942 | hypothetical protein                                                                 |
| TGME49_275755 | 1.72  | 5.48  | 0.0012724 | 0.0196737 | hypothetical protein                                                                 |
| TGME49_270800 | 1.35  | 6.28  | 0.0013471 | 0.020501  | GAF domain-containing protein                                                        |
| TGME49_216335 | 1.84  | 5.09  | 0.0014676 | 0.0217776 | hypothetical protein                                                                 |
| TGME49_238420 | 1.45  | 6.38  | 0.0014765 | 0.021868  | hypothetical protein                                                                 |
| TGME49_313040 | 1.23  | 5.74  | 0.0014925 | 0.0220375 | hypothetical protein                                                                 |
| TGME49_294040 | 1.03  | 7.00  | 0.0014972 | 0.0220375 | KDEL endoplasmic reticulum protein retention receptor 2 (KDEL2), putative            |
| TGME49_252065 | 1.68  | 5.50  | 0.0015271 | 0.0224023 | KRUF family protein                                                                  |
| TGME49_212960 | 1.39  | 6.08  | 0.0016819 | 0.0242332 | hypothetical protein                                                                 |
| TGME49_233100 | 1.21  | 7.71  | 0.0017099 | 0.0245715 | SPFH domain / Band 7 family protein                                                  |
| TGME49_310070 | 1.00  | 7.66  | 0.0017328 | 0.0248076 | methyltransferase, putative                                                          |
| TGME49_312210 | 1.28  | 5.61  | 0.0017411 | 0.0248808 | hypothetical protein                                                                 |
| TGME49_262430 | 1.17  | 6.47  | 0.0017995 | 0.0255261 | 4-hydroxy-3-methylbut-2-en-1-yl diphosphate synthase                                 |
| TGME49_238880 | 1.82  | 6.36  | 0.0018575 | 0.0262045 | hypothetical protein                                                                 |
| TGME49_309380 | 1.09  | 6.75  | 0.0019237 | 0.0269424 | Nuf2                                                                                 |

|               |      |       |           |           |                                                                        |
|---------------|------|-------|-----------|-----------|------------------------------------------------------------------------|
| TGME49_213746 | 1.98 | 4.73  | 0.001955  | 0.0272813 | hypothetical protein                                                   |
| TGME49_202580 | 1.20 | 6.60  | 0.0019867 | 0.027674  | ATPase, AAA family protein                                             |
| TGME49_308090 | 1.04 | 10.08 | 0.0020052 | 0.0278317 | rhoptry protein ROP5                                                   |
| TGME49_258490 | 1.73 | 5.52  | 0.002038  | 0.028135  | hypothetical protein                                                   |
| TGME49_299080 | 1.04 | 6.80  | 0.0020499 | 0.0282174 | VTC domain-containing protein                                          |
| TGME49_239610 | 1.28 | 5.65  | 0.0021372 | 0.0290388 | hypothetical protein                                                   |
| TGME49_253730 | 1.12 | 7.18  | 0.0022206 | 0.0299088 | importin-beta N-terminal domain-containing protein                     |
| TGME49_253940 | 1.02 | 7.11  | 0.0022363 | 0.030067  | CAM Kinase family, incomplete catalytic triad                          |
| TGME49_288820 | 1.04 | 7.00  | 0.0022597 | 0.0302239 | hypothetical protein                                                   |
| TGME49_310220 | 1.17 | 6.44  | 0.0024318 | 0.0317371 | hypothetical protein                                                   |
| TGME49_243480 | 1.88 | 5.50  | 0.0024923 | 0.0321133 | 50S ribosomal protein L3, putative                                     |
| TGME49_253900 | 1.26 | 6.78  | 0.0025305 | 0.0323792 | parasite porphobilinogen synthase PBGS                                 |
| TGME49_224170 | 2.22 | 6.03  | 0.0026178 | 0.0332779 | SAG-related sequence SRS60A                                            |
| TGME49_244645 | 1.38 | 5.13  | 0.0026214 | 0.0332779 | hypothetical protein                                                   |
| TGME49_204060 | 1.41 | 6.00  | 0.0026463 | 0.0335385 | SNARE domain-containing protein                                        |
| TGME49_260150 | 1.72 | 4.60  | 0.0027033 | 0.034064  | tetratricopeptide repeat-containing protein                            |
| TGME49_217400 | 1.19 | 6.75  | 0.0027168 | 0.0340963 | hypothetical protein                                                   |
| TGME49_254090 | 1.06 | 6.60  | 0.0028079 | 0.0348443 | hypothetical protein                                                   |
| TGME49_260520 | 1.01 | 7.53  | 0.0028225 | 0.0348518 | hypothetical protein                                                   |
| TGME49_260660 | 1.25 | 5.71  | 0.002919  | 0.0357065 | 50S ribosomal protein L23, putative                                    |
| TGME49_252630 | 1.05 | 8.18  | 0.0029302 | 0.0357876 | hypothetical protein                                                   |
| TGME49_263390 | 1.37 | 5.79  | 0.0029886 | 0.0364426 | hypothetical protein                                                   |
| TGME49_211860 | 1.05 | 6.19  | 0.0030585 | 0.0371192 | hypothetical protein                                                   |
| TGME49_301222 | 1.27 | 6.33  | 0.0033819 | 0.0398783 | DNA repair protein Rad4 domain-containing protein                      |
| TGME49_269420 | 1.15 | 7.56  | 0.0033838 | 0.0398783 | hypothetical protein                                                   |
| TGME49_252870 | 1.32 | 4.81  | 0.0036159 | 0.0416609 | hypothetical protein                                                   |
| TGME49_228710 | 1.91 | 4.99  | 0.0037212 | 0.0424575 | hypothetical protein                                                   |
| TGME49_215550 | 1.25 | 5.82  | 0.0037217 | 0.0424575 | hypothetical protein                                                   |
| TGME49_271240 | 1.25 | 5.40  | 0.003736  | 0.0424628 | hypothetical protein                                                   |
| TGME49_218530 | 1.09 | 6.69  | 0.0037938 | 0.0428714 | proteasome-interacting thioredoxin domain-containing protein           |
| TGME49_254890 | 1.83 | 5.36  | 0.0038642 | 0.0433252 | hypothetical protein                                                   |
| TGME49_251450 | 1.06 | 6.46  | 0.0039132 | 0.0435925 | hypothetical protein                                                   |
| TGME49_256100 | 1.60 | 5.01  | 0.0039304 | 0.0436584 | tetratricopeptide repeat-containing protein                            |
| TGME49_251770 | 1.01 | 7.36  | 0.003954  | 0.0438573 | hypothetical protein                                                   |
| TGME49_262910 | 1.72 | 5.45  | 0.0039895 | 0.0441875 | NADH-cytochrome b5 reductase 1, putative                               |
| TGME49_285470 | 1.70 | 5.82  | 0.0040374 | 0.0445271 | patched family protein                                                 |
| TGME49_279330 | 1.31 | 5.84  | 0.0041227 | 0.0453376 | DEAD/DEAH box helicase family protein                                  |
| TGME49_255890 | 1.19 | 6.04  | 0.0041367 | 0.0453629 | pyridine nucleotide-disulfide oxidoreductase domain-containing protein |
| TGME49_253180 | 1.08 | 7.97  | 0.0041855 | 0.0458333 | hypothetical protein                                                   |
| TGME49_231940 | 1.10 | 6.46  | 0.0043071 | 0.0466856 | ThiF family protein                                                    |
| TGME49_222130 | 1.02 | 7.05  | 0.0043649 | 0.0469335 | hypothetical protein                                                   |
| TGME49_253960 | 1.29 | 5.45  | 0.0043774 | 0.0470025 | oxidoreductase, short chain dehydrogenase/reductase family protein     |
| TGME49_251570 | 2.16 | 4.62  | 0.0043857 | 0.047026  | CAAX amino terminal protease family protein                            |
| TGME49_262480 | 1.16 | 6.65  | 0.0044027 | 0.047078  | dynein light chain roadblock-type 2, putative                          |
| TGME49_233130 | 1.18 | 5.80  | 0.0044241 | 0.0471764 | nucleoside transporter protein                                         |
| TGME49_251400 | 1.27 | 5.90  | 0.0045372 | 0.0479293 | hypothetical protein                                                   |
| TGME49_310840 | 1.42 | 5.00  | 0.0045639 | 0.0480052 | hypothetical protein                                                   |
| TGME49_261075 | 1.60 | 4.62  | 0.0046303 | 0.0485408 | hypothetical protein                                                   |
| TGME49_313700 | 1.58 | 4.85  | 0.0046337 | 0.0485408 | hypothetical protein                                                   |
| TGME49_262040 | 1.01 | 6.73  | 0.0046568 | 0.048717  | SAC3/GANP family protein                                               |
| TGME49_294980 | 1.32 | 6.15  | 0.0048281 | 0.049901  | hypothetical protein                                                   |
| TGME49_234300 | 1.29 | 6.21  | 0.0048389 | 0.0499457 | hypothetical protein                                                   |
| TGME49_285810 | 1.46 | 5.26  | 0.0048492 | 0.0499853 | MYND finger domain-containing protein                                  |

Supplementary Table S4: Differential gene expression analysis of human MM6 cells infected with T. gondii EGS strain for 18 hours.

| gene ID         | logFC (EGS/CONT) | logCPM | PValue      | FDR         | Product Name                                                                 |
|-----------------|------------------|--------|-------------|-------------|------------------------------------------------------------------------------|
| ENSG00000137959 | 8.67             | 7.38   | 3.4319E-151 | 4.5554E-147 | interferon-induced protein 44-like                                           |
| ENSG00000185885 | 8.20             | 4.54   | 5.06787E-75 | 4.80507E-72 | interferon induced transmembrane protein 1                                   |
| ENSG00000088827 | 8.08             | 4.98   | 9.16289E-79 | 1.10571E-75 | sialic acid binding Ig-like lectin 1, sialoadhesin                           |
| ENSG00000111335 | 7.66             | 5.56   | 2.50817E-81 | 3.69927E-78 | 2'-5'-oligoadenylate synthetase 2, 69/71kDa                                  |
| ENSG00000213626 | 7.25             | 4.68   | 5.13744E-73 | 4.26215E-70 | limb bud and heart development                                               |
| ENSG00000137965 | 6.74             | 6.59   | 1.924E-113  | 1.277E-109  | interferon-induced protein 44                                                |
| ENSG00000100453 | 6.72             | 4.83   | 4.94419E-75 | 4.80507E-72 | granzyme B (granzyme 2, cytotoxic T-lymphocyte-associated serine esterase 1) |
| ENSG00000133106 | 6.54             | 4.72   | 1.03262E-68 | 6.52715E-66 | epithelial stromal interaction 1 (breast)                                    |
| ENSG00000115155 | 6.51             | 5.35   | 2.25682E-85 | 4.27958E-82 | otoferlin                                                                    |
| ENSG00000137801 | 6.42             | 7.08   | 9.5633E-110 | 4.2314E-106 | thrombospondin 1                                                             |
| ENSG00000157601 | 6.39             | 8.70   | 9.8017E-94  | 2.60216E-90 | MX dynamin-like GTPase 1                                                     |
| ENSG00000198959 | 6.36             | 7.57   | 3.52821E-83 | 5.85419E-80 | transglutaminase 2                                                           |
| ENSG00000133316 | 6.27             | 11.34  | 3.35032E-11 | 6.46397E-10 | WD repeat domain 74                                                          |
| ENSG00000111331 | 6.19             | 5.93   | 7.16376E-80 | 9.50918E-77 | 2'-5'-oligoadenylate synthetase 3, 100kDa                                    |
| ENSG00000089127 | 6.14             | 6.34   | 7.95904E-86 | 1.7608E-82  | 2'-5'-oligoadenylate synthetase 1, 40/46kDa                                  |
| ENSG00000169871 | 6.10             | 8.22   | 1.0399E-107 | 3.4508E-104 | tripartite motif containing 56                                               |
| ENSG00000135114 | 5.99             | 4.84   | 3.71637E-52 | 1.40946E-49 | 2'-5'-oligoadenylate synthetase-like                                         |
| ENSG00000072694 | 5.87             | 5.86   | 1.30322E-50 | 4.55235E-48 | Fc fragment of IgG, low affinity IIb, receptor (CD32)                        |
| ENSG00000196562 | 5.78             | 4.31   | 2.26174E-45 | 6.38773E-43 | sulfatase 2                                                                  |
| ENSG00000189221 | 5.62             | 4.22   | 3.80742E-49 | 1.26349E-46 | monoamine oxidase A                                                          |
| ENSG00000269337 | 5.61             | 5.24   | 2.60947E-69 | 1.7319E-66  | AL591479.1                                                                   |
| ENSG00000181195 | 5.60             | 4.57   | 8.21492E-57 | 4.19403E-54 | proenkephalin                                                                |
| ENSG00000225614 | 5.52             | 5.10   | 5.63922E-71 | 4.15862E-68 | zinc finger protein 469                                                      |
| ENSG00000134369 | 5.24             | 5.29   | 2.59166E-16 | 1.00297E-14 | neuron navigator 1                                                           |
| ENSG00000152404 | 5.23             | 8.72   | 5.87336E-70 | 4.10332E-67 | CWF19-like 2, cell cycle control (S. pombe)                                  |
| ENSG00000142192 | 5.11             | 6.36   | 2.6033E-72  | 2.03272E-69 | amyloid beta (A4) precursor protein                                          |
| ENSG00000154153 | 5.00             | 4.24   | 7.42069E-42 | 1.69831E-39 | family with sequence similarity 134, member B                                |
| ENSG00000134321 | 4.99             | 5.26   | 2.23195E-56 | 1.09729E-53 | radical S-adenosyl methionine domain containing 2                            |
| ENSG00000126709 | 4.96             | 9.69   | 5.67393E-60 | 3.2746E-57  | interferon, alpha-inducible protein 6                                        |
| ENSG00000187608 | 4.89             | 7.31   | 1.44161E-76 | 1.59466E-73 | ISG15 ubiquitin-like modifier                                                |
| ENSG00000136960 | 4.79             | 4.81   | 4.70732E-46 | 1.35837E-43 | ectonucleotide pyrophosphatase/phosphodiesterase 2                           |
| ENSG00000196141 | 4.74             | 4.94   | 1.11687E-51 | 4.11814E-49 | spermatogenesis associated, serine-rich 2-like                               |
| ENSG00000136235 | 4.71             | 5.73   | 3.04853E-40 | 6.5268E-38  | glycoprotein (transmembrane) nmb                                             |
| ENSG00000184557 | 4.68             | 4.96   | 7.10429E-51 | 2.54871E-48 | suppressor of cytokine signaling 3                                           |
| ENSG00000115414 | 4.65             | 8.27   | 6.83832E-43 | 1.6504E-40  | fibronectin 1                                                                |
| ENSG00000152104 | 4.50             | 7.55   | 4.36243E-55 | 1.99679E-52 | protein tyrosine phosphatase, non-receptor type 14                           |
| ENSG00000115977 | 4.50             | 7.37   | 5.22892E-74 | 4.62724E-71 | AP2 associated kinase 1                                                      |
| ENSG00000213918 | 4.46             | 4.40   | 1.60216E-40 | 3.48641E-38 | deoxyribonuclease I                                                          |
| ENSG00000028277 | 4.45             | 8.29   | 2.6818E-66  | 1.6181E-63  | POU class 2 homeobox 2                                                       |
| ENSG00000130821 | 4.44             | 6.14   | 4.7242E-47  | 1.49307E-44 | solute carrier family 6 (neurotransmitter transporter), member 8             |
| ENSG00000184979 | 4.42             | 4.53   | 5.34401E-31 | 7.23841E-29 | ubiquitin specific peptidase 18                                              |
| ENSG00000203812 | 4.25             | 6.19   | 5.77851E-50 | 1.96677E-47 | histone cluster 2, H2aa3                                                     |
| ENSG00000130589 | 4.25             | 6.48   | 2.07185E-53 | 8.33386E-51 | helicase with zinc finger 2, transcriptional coactivator                     |
| ENSG00000181458 | 4.21             | 5.34   | 6.83957E-22 | 4.90748E-20 | transmembrane protein 45A                                                    |
| ENSG00000247095 | 4.19             | 4.36   | 2.67412E-17 | 1.1646E-15  | MIR210 host gene                                                             |
| ENSG00000135931 | 4.16             | 5.06   | 1.61538E-37 | 2.97813E-35 | armadillo repeat containing 9                                                |
| ENSG00000180509 | 4.04             | 5.10   | 2.07949E-48 | 6.73248E-46 | potassium channel, voltage gated subfamily E regulatory beta subunit 1       |
| ENSG00000038427 | 4.02             | 9.79   | 6.23954E-40 | 1.29412E-37 | versican                                                                     |
| ENSG00000125148 | 3.99             | 6.60   | 1.6252E-34  | 2.50848E-32 | metallothionein 2A                                                           |
| ENSG00000109881 | 3.98             | 6.66   | 2.461E-37   | 4.47498E-35 | coiled-coil domain containing 34                                             |
| ENSG00000114013 | 3.95             | 6.20   | 4.88717E-53 | 1.90801E-50 | CD86 molecule                                                                |
| ENSG00000204642 | 3.94             | 5.21   | 2.3395E-42  | 5.54545E-40 | major histocompatibility complex, class I, F                                 |
| ENSG00000152457 | 3.93             | 7.01   | 1.73576E-59 | 9.60017E-57 | DNA cross-link repair 1C                                                     |
| ENSG00000203710 | 3.88             | 4.99   | 2.28673E-35 | 3.74741E-33 | complement component (3b/4b) receptor 1 (Knops blood group)                  |
| ENSG00000244509 | 3.86             | 6.61   | 2.36519E-55 | 1.12127E-52 | apolipoprotein B mRNA editing enzyme, catalytic polypeptide-like 3C          |
| ENSG00000143190 | 3.85             | 8.21   | 6.10007E-57 | 3.23889E-54 | POU class 2 homeobox 1                                                       |
| ENSG00000185650 | 3.85             | 6.65   | 9.37316E-39 | 1.8297E-36  | ZFP36 ring finger protein-like 1                                             |
| ENSG00000179029 | 3.85             | 5.92   | 2.13432E-09 | 2.93889E-08 | transmembrane protein 107                                                    |
| ENSG00000182578 | 3.85             | 5.30   | 2.18089E-46 | 6.57934E-44 | colony stimulating factor 1 receptor                                         |
| ENSG00000187193 | 3.85             | 5.92   | 6.3196E-35  | 9.86898E-33 | metallothionein 1X                                                           |
| ENSG00000110324 | 3.83             | 5.19   | 3.12021E-45 | 8.61783E-43 | interleukin 10 receptor, alpha                                               |
| ENSG00000261064 | 3.83             | 5.00   | 7.74958E-42 | 1.74352E-39 | RP11-1000B6.3                                                                |

|                 |      |       |             |             |                                                                              |
|-----------------|------|-------|-------------|-------------|------------------------------------------------------------------------------|
| ENSG00000166750 | 3.81 | 5.89  | 4.33151E-46 | 1.2777E-43  | schlafen family member 5                                                     |
| ENSG00000116741 | 3.79 | 4.63  | 6.73338E-37 | 1.19172E-34 | regulator of G-protein signaling 2                                           |
| ENSG00000020633 | 3.79 | 7.78  | 5.59344E-45 | 1.45583E-42 | runt-related transcription factor 3                                          |
| ENSG00000125726 | 3.77 | 4.86  | 1.5561E-13  | 4.33032E-12 | CD70 molecule                                                                |
| ENSG00000243004 | 3.71 | 6.37  | 4.53854E-18 | 2.17489E-16 | AC005062.2                                                                   |
| ENSG00000114268 | 3.70 | 6.51  | 2.24485E-17 | 9.9327E-16  | 6-phosphofructo-2-kinase/fructose-2,6-bisphosphatase 4                       |
| ENSG00000185507 | 3.67 | 6.68  | 3.18121E-45 | 8.61783E-43 | interferon regulatory factor 7                                               |
| ENSG00000153815 | 3.63 | 7.67  | 2.0782E-54  | 8.89872E-52 | c-Maf inducing protein                                                       |
| ENSG00000204103 | 3.59 | 5.01  | 4.10086E-09 | 5.37894E-08 | v-maf avian musculoaponeurotic fibrosarcoma oncogene homolog B               |
| ENSG00000163633 | 3.58 | 5.05  | 2.86118E-37 | 5.13234E-35 | chromosome 4 open reading frame 36                                           |
| ENSG00000102524 | 3.57 | 8.84  | 2.42796E-31 | 3.35717E-29 | tumor necrosis factor (ligand) superfamily, member 13b                       |
| ENSG00000196739 | 3.57 | 5.16  | 1.89033E-32 | 2.78803E-30 | collagen, type XXVII, alpha 1                                                |
| ENSG00000259112 | 3.56 | 5.23  | 3.4157E-15  | 1.16555E-13 | NDUFC2-KCTD14 readthrough                                                    |
| ENSG00000088826 | 3.55 | 5.62  | 3.79537E-43 | 9.5056E-41  | spermine oxidase                                                             |
| ENSG00000188313 | 3.54 | 7.61  | 1.43311E-54 | 6.34104E-52 | phospholipid scramblase 1                                                    |
| ENSG00000134326 | 3.53 | 5.53  | 5.08311E-39 | 1.02232E-36 | cytidine monophosphate (UMP-CMP) kinase 2, mitochondrial                     |
| ENSG00000186918 | 3.49 | 7.86  | 5.20546E-47 | 1.60691E-44 | zinc finger protein 395                                                      |
| ENSG00000158769 | 3.47 | 5.05  | 1.88984E-36 | 3.25788E-34 | F11 receptor                                                                 |
| ENSG00000124762 | 3.47 | 5.15  | 1.41362E-29 | 1.75368E-27 | cyclin-dependent kinase inhibitor 1A (p21, Cip1)                             |
| ENSG00000049323 | 3.47 | 4.94  | 6.17733E-11 | 1.12945E-09 | latent transforming growth factor beta binding protein 1                     |
| ENSG00000138640 | 3.46 | 4.58  | 6.73363E-31 | 8.93821E-29 | family with sequence similarity 13, member A                                 |
| ENSG00000275565 | 3.45 | 4.21  | 1.18341E-26 | 1.24671E-24 | arachidonate 5-lipoxygenase                                                  |
| ENSG00000213741 | 3.42 | 11.26 | 1.86784E-24 | 1.6982E-22  | ribosomal protein S29                                                        |
| ENSG00000130402 | 3.42 | 11.00 | 6.90837E-22 | 4.9302E-20  | actinin, alpha 4                                                             |
| ENSG00000251474 | 3.39 | 5.58  | 3.90458E-40 | 8.22688E-38 | ribosomal protein L32 pseudogene 3                                           |
| ENSG00000177410 | 3.37 | 8.48  | 8.40323E-44 | 2.14509E-41 | ZNF1 antisense RNA 1                                                         |
| ENSG00000138433 | 3.32 | 7.26  | 9.98061E-42 | 2.20804E-39 | corepressor interacting with RBPJ, 1                                         |
| ENSG00000267855 | 3.28 | 4.84  | 3.4714E-25  | 3.33908E-23 | NADH dehydrogenase (ubiquinone) 1 alpha subcomplex, 7, 14.5kDa               |
| ENSG00000115165 | 3.28 | 5.03  | 2.81061E-26 | 2.86984E-24 | cytohesin 1 interacting protein                                              |
| ENSG00000109107 | 3.25 | 6.63  | 6.80002E-22 | 4.90562E-20 | aldolase C, fructose-bisphosphate                                            |
| ENSG00000072682 | 3.21 | 4.72  | 5.10442E-26 | 5.13304E-24 | prolyl 4-hydroxylase, alpha polypeptide II                                   |
| ENSG00000138496 | 3.19 | 6.67  | 3.1869E-42  | 7.42155E-40 | poly (ADP-ribose) polymerase family, member 9                                |
| ENSG00000111674 | 3.17 | 6.20  | 1.12517E-30 | 1.45005E-28 | enolase 2 (gamma, neuronal)                                                  |
| ENSG00000165029 | 3.17 | 4.31  | 1.18757E-25 | 1.16769E-23 | ATP-binding cassette, sub-family A (ABC1), member 1                          |
| ENSG00000101745 | 3.17 | 7.63  | 6.23374E-38 | 1.18209E-35 | ankyrin repeat domain 12                                                     |
| ENSG00000259529 | 3.15 | 5.99  | 7.59612E-39 | 1.50494E-36 | Uncharacterized protein                                                      |
| ENSG00000163823 | 3.15 | 6.12  | 2.64465E-17 | 1.15858E-15 | chemokine (C-C motif) receptor 1                                             |
| ENSG00000160593 | 3.13 | 4.62  | 2.03445E-11 | 4.0917E-10  | adhesion molecule, interacts with CXADR antigen 1                            |
| ENSG00000166012 | 3.10 | 9.58  | 4.11026E-06 | 2.74583E-05 | TATA box binding protein (TBP)-associated factor, RNA polymerase I, D, 41kDa |
| ENSG00000119547 | 3.06 | 8.17  | 6.9064E-20  | 4.05644E-18 | one cut homeobox 2                                                           |
| ENSG00000160932 | 3.06 | 8.18  | 1.77521E-34 | 2.70852E-32 | lymphocyte antigen 6 complex, locus E                                        |
| ENSG00000187837 | 3.05 | 5.94  | 1.91335E-26 | 1.99983E-24 | histone cluster 1, H1c                                                       |
| ENSG00000186660 | 3.04 | 5.15  | 9.97434E-11 | 1.78677E-09 | ZFP91 zinc finger protein                                                    |
| ENSG00000171858 | 3.03 | 10.39 | 2.16854E-23 | 1.81039E-21 | ribosomal protein S21                                                        |
| ENSG00000169715 | 3.01 | 4.84  | 2.07767E-25 | 2.01307E-23 | metallothionein 1E                                                           |
| ENSG00000138642 | 3.01 | 4.40  | 2.82404E-23 | 2.34289E-21 | HECT and RLD domain containing E3 ubiquitin protein ligase family member 6   |
| ENSG00000197555 | 3.00 | 5.60  | 4.16865E-35 | 6.66683E-33 | signal-induced proliferation-associated 1 like 1                             |
| ENSG00000177409 | 2.97 | 6.39  | 1.02535E-20 | 6.54354E-19 | sterile alpha motif domain containing 9-like                                 |
| ENSG00000178726 | 2.95 | 5.92  | 5.49068E-35 | 8.67658E-33 | thrombomodulin                                                               |
| ENSG00000133059 | 2.95 | 5.60  | 1.02919E-30 | 1.35263E-28 | dual serine/threonine and tyrosine protein kinase                            |
| ENSG00000095066 | 2.94 | 7.52  | 3.63011E-39 | 7.41323E-37 | hook microtubule-tethering protein 2                                         |
| ENSG00000176171 | 2.92 | 7.30  | 6.16488E-26 | 6.15283E-24 | BCL2/adenovirus E1B 19kDa interacting protein 3                              |
| ENSG00000170412 | 2.92 | 4.31  | 5.21803E-15 | 1.75352E-13 | G protein-coupled receptor, class C, group 5, member C                       |
| ENSG00000141905 | 2.92 | 7.96  | 8.27445E-23 | 6.46089E-21 | nuclear factor I/C (CCAAT-binding transcription factor)                      |
| ENSG00000134597 | 2.91 | 6.47  | 6.43172E-36 | 1.09455E-33 | RNA binding motif protein, X-linked 2                                        |
| ENSG00000181690 | 2.89 | 4.61  | 5.31759E-25 | 4.97082E-23 | pleiomorphic adenoma gene 1                                                  |
| ENSG00000147872 | 2.89 | 8.38  | 1.32703E-24 | 1.21483E-22 | perilipin 2                                                                  |
| ENSG00000267121 | 2.87 | 4.86  | 8.88106E-25 | 8.24386E-23 | CTD-2020K17.1                                                                |
| ENSG00000134955 | 2.87 | 5.60  | 2.71121E-31 | 3.71016E-29 | solute carrier family 37 (glucose-6-phosphate transporter), member 2         |
| ENSG00000173821 | 2.86 | 8.82  | 1.06696E-27 | 1.22094E-25 | ring finger protein 213                                                      |
| ENSG00000153006 | 2.85 | 7.35  | 5.68221E-32 | 8.28854E-30 | SREK1-interacting protein 1                                                  |
| ENSG00000184678 | 2.85 | 4.35  | 2.65258E-18 | 1.3237E-16  | histone cluster 2, H2be                                                      |
| ENSG00000203875 | 2.84 | 8.95  | 1.08847E-30 | 1.4165E-28  | small nucleolar RNA host gene 5                                              |
| ENSG00000131944 | 2.84 | 4.99  | 4.21269E-25 | 3.99424E-23 | Fanconi anemia core complex associated protein 24                            |
| ENSG00000122884 | 2.84 | 7.94  | 8.38096E-36 | 1.40821E-33 | prolyl 4-hydroxylase, alpha polypeptide I                                    |
| ENSG00000055332 | 2.84 | 7.50  | 1.18699E-37 | 2.21916E-35 | eukaryotic translation initiation factor 2-alpha kinase 2                    |
| ENSG00000270316 | 2.82 | 4.81  | 7.22721E-23 | 5.71035E-21 | C10orf32-ASMT readthrough (NMD candidate)                                    |
| ENSG00000197013 | 2.81 | 4.83  | 7.93287E-22 | 5.60111E-20 | zinc finger protein 429                                                      |
| ENSG00000165071 | 2.79 | 4.29  | 1.58313E-19 | 8.79267E-18 | transmembrane protein 71                                                     |
| ENSG00000270882 | 2.78 | 4.34  | 1.18573E-13 | 3.3417E-12  | histone cluster 2, H4a                                                       |
| ENSG00000177954 | 2.77 | 10.90 | 3.79752E-18 | 1.83972E-16 | ribosomal protein S27                                                        |
| ENSG00000146192 | 2.76 | 4.32  | 1.51263E-17 | 6.87485E-16 | FYVE, RhoGEF and PH domain containing 2                                      |

|                 |      |      |             |             |                                                                                                           |
|-----------------|------|------|-------------|-------------|-----------------------------------------------------------------------------------------------------------|
| ENSG0000067082  | 2.75 | 5.81 | 9.95132E-27 | 1.06527E-24 | Kruppel-like factor 6                                                                                     |
| ENSG00000143315 | 2.74 | 6.36 | 5.55563E-31 | 7.44904E-29 | phosphatidylinositol glycan anchor biosynthesis, class M                                                  |
| ENSG00000280755 | 2.73 | 6.02 | 1.73321E-30 | 2.21217E-28 | SP110 nuclear body protein                                                                                |
| ENSG00000171766 | 2.73 | 4.23 | 3.16777E-15 | 1.08654E-13 | glycine amidinotransferase (L-arginine:glycine amidinotransferase)                                        |
| ENSG00000132274 | 2.73 | 4.63 | 4.75193E-09 | 6.15987E-08 | tripartite motif containing 22                                                                            |
| ENSG00000118515 | 2.73 | 5.96 | 2.76496E-30 | 3.46246E-28 | serum/glucocorticoid regulated kinase 1                                                                   |
| ENSG00000140941 | 2.72 | 6.79 | 3.9334E-35  | 6.36731E-33 | microtubule-associated protein 1 light chain 3 beta                                                       |
| ENSG00000162959 | 2.70 | 5.00 | 3.85316E-22 | 2.81026E-20 | mediator of cell motility 1                                                                               |
| ENSG00000169403 | 2.67 | 4.97 | 3.34787E-22 | 2.45523E-20 | platelet-activating factor receptor                                                                       |
| ENSG00000205413 | 2.67 | 6.26 | 2.1686E-27  | 2.4395E-25  | sterile alpha motif domain containing 9                                                                   |
| ENSG00000008952 | 2.66 | 8.93 | 1.25949E-22 | 9.66384E-21 | SEC62 homolog (S. cerevisiae)                                                                             |
| ENSG00000088888 | 2.65 | 6.26 | 2.7402E-22  | 2.055E-20   | mitochondrial antiviral signaling protein                                                                 |
| ENSG00000139626 | 2.65 | 5.88 | 9.85521E-10 | 1.4471E-08  | integrin, beta 7                                                                                          |
| ENSG00000100592 | 2.64 | 4.98 | 3.82051E-21 | 2.53567E-19 | dishevelled associated activator of morphogenesis 1                                                       |
| ENSG00000197358 | 2.62 | 5.95 | 2.96864E-14 | 9.10064E-13 | BCL2/adenovirus E1B 19kDa interacting protein 3 pseudogene 1                                              |
| ENSG00000113140 | 2.61 | 6.16 | 3.06128E-20 | 1.8555E-18  | secreted protein, acidic, cysteine-rich (osteonectin)                                                     |
| ENSG00000104765 | 2.58 | 7.05 | 3.26246E-18 | 1.60392E-16 | BCL2/adenovirus E1B 19kDa interacting protein 3-like                                                      |
| ENSG00000135916 | 2.55 | 7.57 | 1.89517E-30 | 2.39585E-28 | integral membrane protein 2C                                                                              |
| ENSG00000171475 | 2.55 | 6.50 | 1.79754E-29 | 2.18904E-27 | WAS/WASL interacting protein family, member 2                                                             |
| ENSG00000274233 | 2.55 | 7.57 | 1.44318E-31 | 2.04394E-29 | chemokine (C-C motif) ligand 5                                                                            |
| ENSG00000163565 | 2.54 | 7.62 | 3.21951E-10 | 5.23082E-09 | interferon, gamma-inducible protein 16                                                                    |
| ENSG00000155926 | 2.54 | 6.61 | 4.39511E-27 | 4.86172E-25 | Src-like adaptor                                                                                          |
| ENSG00000138172 | 2.53 | 4.77 | 2.58814E-16 | 1.00297E-14 | calcium homeostasis modulator 2                                                                           |
| ENSG00000171724 | 2.53 | 4.70 | 1.51089E-18 | 7.74344E-17 | vesicle amine transport 1-like                                                                            |
| ENSG00000197063 | 2.53 | 8.61 | 2.20633E-26 | 2.28803E-24 | v-maf avian musculoaponeurotic fibrosarcoma oncogene homolog G                                            |
| ENSG00000171860 | 2.52 | 4.58 | 0.000210197 | 0.000899468 | complement component 3a receptor 1                                                                        |
| ENSG00000108771 | 2.52 | 4.98 | 5.27324E-21 | 3.4652E-19  | DEXH (Asp-Glu-X-His) box polypeptide 58                                                                   |
| ENSG00000137815 | 2.52 | 8.06 | 2.07772E-27 | 2.35724E-25 | RTF1 homolog, Paf1/RNA polymerase II complex component                                                    |
| ENSG00000103111 | 2.52 | 6.86 | 1.77961E-29 | 2.18727E-27 | MON1 secretory trafficking family member B                                                                |
| ENSG00000217555 | 2.51 | 6.03 | 2.54726E-26 | 2.62111E-24 | chemokine-like factor                                                                                     |
| ENSG00000189060 | 2.49 | 5.87 | 1.33774E-25 | 1.30567E-23 | H1 histone family, member 0                                                                               |
| ENSG00000165233 | 2.48 | 5.42 | 2.10445E-23 | 1.77927E-21 | chromosome 9 open reading frame 89                                                                        |
| ENSG00000278550 | 2.48 | 5.60 | 3.50362E-23 | 2.83579E-21 | solute carrier family 43 (amino acid system L transporter), member 2                                      |
| ENSG00000076053 | 2.47 | 4.25 | 3.4057E-13  | 9.04146E-12 | RNA binding motif protein 7                                                                               |
| ENSG00000138646 | 2.47 | 5.88 | 1.92602E-21 | 1.29776E-19 | HECT and RLD domain containing E3 ubiquitin protein ligase 5                                              |
| ENSG00000234545 | 2.44 | 6.57 | 7.81288E-24 | 6.86809E-22 | family with sequence similarity 133, member B                                                             |
| ENSG00000135318 | 2.44 | 6.91 | 3.39614E-10 | 5.47092E-09 | 5'-nucleotidase, ecto (CD73)                                                                              |
| ENSG00000141027 | 2.44 | 7.95 | 1.86294E-28 | 2.22781E-26 | nuclear receptor corepressor 1                                                                            |
| ENSG00000104081 | 2.43 | 5.44 | 1.24744E-18 | 6.41804E-17 | Bcl2 modifying factor                                                                                     |
| ENSG00000139289 | 2.42 | 5.00 | 4.29693E-16 | 1.59323E-14 | pleckstrin homology-like domain, family A, member 1                                                       |
| ENSG00000270898 | 2.42 | 6.17 | 2.14543E-23 | 1.80243E-21 | GPR75-ASB3 readthrough                                                                                    |
| ENSG00000138061 | 2.42 | 6.60 | 7.40997E-24 | 6.55733E-22 | cytochrome P450, family 1, subfamily B, polypeptide 1                                                     |
| ENSG00000007944 | 2.41 | 7.38 | 2.55896E-27 | 2.85442E-25 | myosin regulatory light chain interacting protein                                                         |
| ENSG00000167851 | 2.41 | 5.01 | 1.72592E-06 | 1.25602E-05 | CD300a molecule                                                                                           |
| ENSG00000173193 | 2.41 | 7.13 | 2.79211E-22 | 2.08216E-20 | poly (ADP-ribose) polymerase family, member 14                                                            |
| ENSG00000107201 | 2.40 | 5.42 | 6.29358E-22 | 4.56508E-20 | DEAD (Asp-Glu-Ala-Asp) box polypeptide 58                                                                 |
| ENSG00000000938 | 2.39 | 5.81 | 2.82389E-10 | 4.63342E-09 | FGR proto-oncogene, Src family tyrosine kinase                                                            |
| ENSG00000125676 | 2.39 | 9.23 | 2.13494E-19 | 1.1759E-17  | THO complex 2                                                                                             |
| ENSG00000123384 | 2.38 | 7.53 | 3.78729E-16 | 1.41704E-14 | low density lipoprotein receptor-related protein 1                                                        |
| ENSG00000132530 | 2.38 | 6.80 | 1.08681E-08 | 1.31267E-07 | XIAP associated factor 1                                                                                  |
| ENSG00000142089 | 2.38 | 6.52 | 3.63859E-18 | 1.76918E-16 | interferon induced transmembrane protein 3                                                                |
| ENSG00000158373 | 2.36 | 5.01 | 1.24963E-19 | 7.0887E-18  | histone cluster 1, H2bd                                                                                   |
| ENSG00000111424 | 2.36 | 4.79 | 5.74517E-19 | 3.0383E-17  | vitamin D (1,25-dihydroxyvitamin D3) receptor                                                             |
| ENSG00000188177 | 2.35 | 5.44 | 6.97895E-19 | 3.66161E-17 | zinc finger CCCH-type containing 6                                                                        |
| ENSG00000056558 | 2.34 | 4.35 | 6.1894E-16  | 2.26331E-14 | TNF receptor-associated factor 1                                                                          |
| ENSG00000196968 | 2.34 | 5.62 | 1.49156E-20 | 9.42806E-19 | fucosyltransferase 11 (alpha (1,3) fucosyltransferase)                                                    |
| ENSG00000139168 | 2.33 | 6.09 | 1.47699E-19 | 8.2724E-18  | zinc finger CCHC-type and RNA binding motif 1                                                             |
| ENSG00000272886 | 2.33 | 6.94 | 6.23793E-27 | 6.78707E-25 | decapping mRNA 1A                                                                                         |
| ENSG00000258472 | 2.33 | 4.63 | 4.63766E-09 | 6.02941E-08 | Uncharacterized protein                                                                                   |
| ENSG00000171992 | 2.33 | 4.76 | 2.06583E-18 | 1.04664E-16 | synaptodin                                                                                                |
| ENSG00000162599 | 2.33 | 6.03 | 1.68917E-20 | 1.05268E-18 | nuclear factor I/A                                                                                        |
| ENSG00000143847 | 2.33 | 5.36 | 1.55144E-11 | 3.16828E-10 | protein tyrosine phosphatase, receptor type, f polypeptide (PTPRF), interacting protein (liprin), alpha 4 |
| ENSG00000216490 | 2.32 | 7.34 | 7.46164E-07 | 5.99208E-06 | interferon, gamma-inducible protein 30                                                                    |
| ENSG00000147894 | 2.32 | 4.77 | 2.01328E-17 | 8.96789E-16 | chromosome 9 open reading frame 72                                                                        |
| ENSG00000116017 | 2.31 | 8.25 | 3.50421E-25 | 3.3464E-23  | AT rich interactive domain 3A (BRIGHT-like)                                                               |
| ENSG00000146247 | 2.30 | 7.98 | 2.25319E-18 | 1.13722E-16 | pleckstrin homology domain interacting protein                                                            |
| ENSG00000069399 | 2.30 | 4.83 | 3.11269E-17 | 1.34586E-15 | B-cell CLL/lymphoma 3                                                                                     |
| ENSG00000151461 | 2.30 | 6.92 | 5.72901E-24 | 5.1383E-22  | UPF2 regulator of nonsense transcripts homolog (yeast)                                                    |
| ENSG00000145012 | 2.29 | 6.65 | 4.83444E-25 | 4.55123E-23 | LIM domain containing preferred translocation partner in lipoma                                           |
| ENSG00000237727 | 2.29 | 5.40 | 1.62717E-22 | 1.24132E-20 | allograft inflammatory factor 1                                                                           |
| ENSG00000180573 | 2.28 | 6.41 | 3.54825E-23 | 2.85451E-21 | histone cluster 1, H2ac                                                                                   |
| ENSG00000188825 | 2.28 | 4.34 | 3.70134E-10 | 5.94094E-09 | long intergenic non-protein coding RNA 910                                                                |

|                 |      |       |             |             |                                                                                       |
|-----------------|------|-------|-------------|-------------|---------------------------------------------------------------------------------------|
| ENSG00000143546 | 2.28 | 9.69  | 1.74238E-14 | 5.50181E-13 | S100 calcium binding protein A8                                                       |
| ENSG00000101384 | 2.28 | 4.45  | 4.46896E-15 | 1.50561E-13 | jagged 1                                                                              |
| ENSG00000271605 | 2.28 | 6.11  | 1.97962E-16 | 7.82066E-15 | mast cell immunoglobulin-like receptor 1                                              |
| ENSG00000127920 | 2.27 | 5.96  | 1.67383E-17 | 7.53168E-16 | guanine nucleotide binding protein (G protein), gamma 11                              |
| ENSG00000183486 | 2.27 | 8.07  | 1.28048E-21 | 8.80681E-20 | MX dynamin-like GTPase 2                                                              |
| ENSG00000135185 | 2.26 | 4.63  | 2.47953E-14 | 7.69003E-13 | transmembrane protein 243, mitochondrial                                              |
| ENSG00000159388 | 2.26 | 5.11  | 3.06067E-10 | 4.99721E-09 | BTG family, member 2                                                                  |
| ENSG00000130208 | 2.26 | 5.02  | 2.7503E-06  | 1.92246E-05 | apolipoprotein C-I                                                                    |
| ENSG00000172831 | 2.26 | 6.34  | 7.87611E-23 | 6.18624E-21 | carboxylesterase 2                                                                    |
| ENSG00000159140 | 2.25 | 9.64  | 1.50421E-14 | 4.78822E-13 | SON DNA binding protein                                                               |
| ENSG00000197323 | 2.24 | 6.97  | 1.07493E-22 | 8.34423E-21 | tripartite motif containing 33                                                        |
| ENSG00000183354 | 2.22 | 5.73  | 1.54327E-20 | 9.70874E-19 | KIAA2026                                                                              |
| ENSG00000145592 | 2.22 | 10.72 | 2.42892E-13 | 6.56651E-12 | ribosomal protein L37                                                                 |
| ENSG00000156603 | 2.22 | 4.85  | 6.74899E-17 | 2.82606E-15 | mediator complex subunit 19                                                           |
| ENSG00000169439 | 2.21 | 7.02  | 3.16643E-23 | 2.59452E-21 | syndecan 2                                                                            |
| ENSG00000165801 | 2.21 | 5.45  | 1.36506E-19 | 7.67787E-18 | Rho guanine nucleotide exchange factor (GEF) 40                                       |
| ENSG00000139266 | 2.20 | 5.68  | 1.16088E-20 | 7.37298E-19 | membrane-associated ring finger (C3HC4) 9                                             |
| ENSG00000182899 | 2.20 | 10.16 | 4.25298E-15 | 1.43649E-13 | ribosomal protein L35a                                                                |
| ENSG00000147443 | 2.20 | 5.75  | 6.77891E-14 | 1.99078E-12 | docking protein 2, 56kDa                                                              |
| ENSG00000101966 | 2.19 | 6.86  | 7.18967E-23 | 5.71035E-21 | X-linked inhibitor of apoptosis, E3 ubiquitin protein ligase                          |
| ENSG00000168209 | 2.19 | 8.96  | 0.000559037 | 0.002112944 | DNA-damage-inducible transcript 4                                                     |
| ENSG00000126759 | 2.18 | 4.38  | 3.56771E-13 | 9.43382E-12 | complement factor properdin                                                           |
| ENSG00000196199 | 2.18 | 7.42  | 7.73741E-20 | 4.52451E-18 | M-phase phosphoprotein 8                                                              |
| ENSG00000164096 | 2.18 | 7.82  | 8.56931E-22 | 5.95544E-20 | chromosome 4 open reading frame 3                                                     |
| ENSG00000165355 | 2.17 | 5.52  | 5.38844E-18 | 2.55451E-16 | F-box protein 33                                                                      |
| ENSG00000166482 | 2.17 | 4.28  | 4.30586E-05 | 0.000222397 | microfibrillar-associated protein 4                                                   |
| ENSG00000188157 | 2.16 | 6.17  | 1.41877E-21 | 9.685E-20   | agrin                                                                                 |
| ENSG00000204130 | 2.16 | 4.33  | 1.16429E-13 | 3.28825E-12 | RUN and FYVE domain containing 2                                                      |
| ENSG00000178951 | 2.15 | 7.21  | 4.00831E-21 | 2.64708E-19 | zinc finger and BTB domain containing 7A                                              |
| ENSG00000058272 | 2.15 | 6.59  | 4.82232E-18 | 2.29432E-16 | protein phosphatase 1, regulatory subunit 12A                                         |
| ENSG00000170458 | 2.15 | 7.05  | 3.21989E-05 | 0.000171376 | CD14 molecule                                                                         |
| ENSG00000275342 | 2.15 | 5.41  | 4.49193E-19 | 2.414E-17   | Tyrosine-protein kinase Sgk223                                                        |
| ENSG00000205758 | 2.14 | 5.30  | 1.41714E-17 | 6.48661E-16 | crystallin, zeta (quinone reductase)-like 1                                           |
| ENSG00000099337 | 2.14 | 5.53  | 2.81675E-18 | 1.39513E-16 | potassium channel, two pore domain subfamily K, member 6                              |
| ENSG00000160602 | 2.13 | 4.82  | 1.62703E-16 | 6.50516E-15 | NIMA-related kinase 8                                                                 |
| ENSG00000174938 | 2.13 | 6.26  | 2.63013E-12 | 6.01936E-11 | seizure related 6 homolog (mouse)-like 2                                              |
| ENSG00000104419 | 2.13 | 8.95  | 8.64863E-14 | 2.48489E-12 | N-myc downstream regulated 1                                                          |
| ENSG00000229314 | 2.13 | 4.73  | 0.000410386 | 0.001611198 | orosomucoid 1                                                                         |
| ENSG00000059804 | 2.12 | 6.19  | 2.0418E-08  | 2.2949E-07  | solute carrier family 2 (facilitated glucose transporter), member 3                   |
| ENSG00000139278 | 2.11 | 6.81  | 1.32834E-19 | 7.50312E-18 | GLI pathogenesis-related 1                                                            |
| ENSG00000157350 | 2.10 | 5.63  | 9.87881E-20 | 5.65221E-18 | ST3 beta-galactoside alpha-2,3-sialyltransferase 2                                    |
| ENSG00000095303 | 2.10 | 5.35  | 3.35118E-18 | 1.64146E-16 | prostaglandin-endoperoxide synthase 1 (prostaglandin G/H synthase and cyclooxygenase) |
| ENSG00000146278 | 2.10 | 6.81  | 2.88522E-21 | 1.93426E-19 | proline-rich nuclear receptor coactivator 1                                           |
| ENSG00000119004 | 2.10 | 4.41  | 5.89083E-14 | 1.74153E-12 | cytochrome P450, family 20, subfamily A, polypeptide 1                                |
| ENSG00000121281 | 2.09 | 6.03  | 9.98949E-20 | 5.69101E-18 | adenylate cyclase 7                                                                   |
| ENSG00000245209 | 2.08 | 4.93  | 7.44557E-14 | 2.16738E-12 | AP001007.1                                                                            |
| ENSG00000204054 | 2.08 | 7.36  | 7.27281E-14 | 2.12174E-12 | long intergenic non-protein coding RNA 963                                            |
| ENSG00000166595 | 2.08 | 6.21  | 2.30798E-20 | 1.41834E-18 | family with sequence similarity 96, member B                                          |
| ENSG00000160613 | 2.07 | 6.92  | 1.48497E-19 | 8.28216E-18 | proprotein convertase subtilisin/kexin type 7                                         |
| ENSG00000103248 | 2.07 | 4.70  | 2.30637E-13 | 6.27352E-12 | methenyltetrahydrofolate synthetase domain containing                                 |
| ENSG00000213853 | 2.06 | 5.14  | 1.222E-09   | 1.7555E-08  | epithelial membrane protein 2                                                         |
| ENSG00000162645 | 2.06 | 4.72  | 2.58513E-12 | 5.94715E-11 | guanylate binding protein 2, interferon-inducible                                     |
| ENSG00000135218 | 2.05 | 4.33  | 1.48486E-08 | 1.72744E-07 | CD36 molecule (thrombospondin receptor)                                               |
| ENSG00000120688 | 2.05 | 4.76  | 1.4445E-13  | 4.0367E-12  | WW domain binding protein 4                                                           |
| ENSG00000059728 | 2.05 | 7.24  | 7.2008E-22  | 5.11141E-20 | MAX dimerization protein 1                                                            |
| ENSG00000196227 | 2.05 | 6.05  | 8.81193E-19 | 4.6051E-17  | family with sequence similarity 217, member B                                         |
| ENSG00000198863 | 2.05 | 5.58  | 4.87028E-17 | 2.05232E-15 | RUN domain containing 1                                                               |
| ENSG00000136826 | 2.05 | 5.46  | 9.03106E-16 | 3.25756E-14 | Kruppel-like factor 4 (gut)                                                           |
| ENSG00000233927 | 2.04 | 9.09  | 1.04874E-16 | 4.28338E-15 | ribosomal protein S28                                                                 |
| ENSG00000179085 | 2.04 | 5.12  | 2.15894E-14 | 6.77489E-13 | dolichyl-phosphate mannosyltransferase polypeptide 3                                  |
| ENSG00000065989 | 2.04 | 4.27  | 1.0279E-11  | 2.1831E-10  | phosphodiesterase 4A, cAMP-specific                                                   |
| ENSG00000129667 | 2.03 | 5.32  | 2.81022E-15 | 9.7143E-14  | rhomboid 5 homolog 2 (Drosophila)                                                     |
| ENSG00000116977 | 2.03 | 7.02  | 8.34955E-20 | 4.81878E-18 | lectin, galactoside-binding, soluble, 8                                               |
| ENSG00000242711 | 2.02 | 5.74  | 1.56807E-15 | 5.56541E-14 | proteasome (prosome, macropain) subunit, beta type, 9                                 |
| ENSG00000135637 | 2.01 | 6.57  | 3.91265E-19 | 2.11124E-17 | coiled-coil domain containing 142                                                     |
| ENSG00000186162 | 2.01 | 4.57  | 6.13488E-14 | 1.80564E-12 | cell death-inducing DFFA-like effector c pseudogene                                   |
| ENSG00000197956 | 2.00 | 9.31  | 1.38626E-10 | 2.41803E-09 | S100 calcium binding protein A6                                                       |
| ENSG00000273686 | 2.00 | 12.53 | 2.38196E-07 | 2.1306E-06  | beta-2-microglobulin                                                                  |
| ENSG00000163536 | 2.00 | 4.71  | 3.93621E-11 | 7.47486E-10 | serpin peptidase inhibitor, clade I (neuroserpin), member 1                           |
| ENSG00000116667 | 2.00 | 4.79  | 2.80599E-07 | 2.45691E-06 | chromosome 1 open reading frame 21                                                    |
| ENSG00000163221 | 2.00 | 4.94  | 9.84647E-10 | 1.4471E-08  | S100 calcium binding protein A12                                                      |
| ENSG00000187257 | 1.99 | 6.98  | 3.0857E-18  | 1.5225E-16  | round spermatid basic protein 1-like                                                  |

|                 |      |       |             |             |                                                                                     |
|-----------------|------|-------|-------------|-------------|-------------------------------------------------------------------------------------|
| ENSG00000235309 | 1.99 | 6.62  | 3.87229E-20 | 2.31535E-18 | major histocompatibility complex, class I, J (pseudogene)                           |
| ENSG00000163644 | 1.99 | 6.12  | 4.85283E-11 | 9.02191E-10 | protein phosphatase, Mg <sup>2+</sup> /Mn <sup>2+</sup> dependent, 1K               |
| ENSG00000101336 | 1.98 | 6.42  | 2.2226E-14  | 6.94182E-13 | HCK proto-oncogene, Src family tyrosine kinase                                      |
| ENSG00000130813 | 1.98 | 5.89  | 2.4746E-16  | 9.66114E-15 | chromosome 19 open reading frame 66                                                 |
| ENSG00000110077 | 1.98 | 5.75  | 1.07316E-13 | 3.0569E-12  | membrane-spanning 4-domains, subfamily A, member 6A                                 |
| ENSG00000140948 | 1.98 | 5.18  | 1.91314E-16 | 7.58061E-15 | zinc finger, CCHC domain containing 14                                              |
| ENSG00000143333 | 1.97 | 4.95  | 4.20049E-11 | 7.93135E-10 | regulator of G-protein signaling 16                                                 |
| ENSG00000172809 | 1.97 | 10.42 | 4.20872E-11 | 7.93558E-10 | ribosomal protein L38                                                               |
| ENSG00000167207 | 1.97 | 4.77  | 1.59963E-13 | 4.43289E-12 | nucleotide-binding oligomerization domain containing 2                              |
| ENSG00000131503 | 1.97 | 8.06  | 2.38191E-19 | 1.30113E-17 | ankyrin repeat and KH domain containing 1                                           |
| ENSG00000136770 | 1.97 | 6.61  | 2.73335E-17 | 1.1857E-15  | DnaJ (Hsp40) homolog, subfamily C, member 1                                         |
| ENSG00000167604 | 1.97 | 4.62  | 2.32881E-13 | 6.3087E-12  | nuclear factor of kappa light polypeptide gene enhancer in B-cells inhibitor, delta |
| ENSG00000170801 | 1.96 | 5.82  | 2.20805E-07 | 1.98881E-06 | HtrA serine peptidase 3                                                             |
| ENSG00000131067 | 1.96 | 5.07  | 5.48874E-15 | 1.83984E-13 | gamma-glutamyltransferase 7                                                         |
| ENSG00000111981 | 1.95 | 4.30  | 9.30055E-08 | 9.10438E-07 | UL16 binding protein 1                                                              |
| ENSG00000196576 | 1.94 | 6.58  | 9.5067E-15  | 3.09294E-13 | plexin B2                                                                           |
| ENSG00000085514 | 1.93 | 4.43  | 1.56995E-12 | 3.73467E-11 | paired immunoglobulin-like type 2 receptor alpha                                    |
| ENSG00000177606 | 1.93 | 5.47  | 9.67006E-06 | 5.89892E-05 | jun proto-oncogene                                                                  |
| ENSG00000114023 | 1.93 | 6.60  | 6.87937E-18 | 3.2041E-16  | family with sequence similarity 162, member A                                       |
| ENSG00000197903 | 1.92 | 8.22  | 2.19644E-07 | 1.98067E-06 | histone cluster 1, H2bk                                                             |
| ENSG00000053254 | 1.92 | 7.04  | 3.57446E-17 | 1.53056E-15 | forkhead box N3                                                                     |
| ENSG00000106479 | 1.92 | 5.22  | 9.25361E-16 | 3.32879E-14 | zinc finger protein 862                                                             |
| ENSG00000131469 | 1.92 | 10.24 | 2.95992E-11 | 5.761E-10   | ribosomal protein L27                                                               |
| ENSG00000148180 | 1.92 | 4.82  | 3.00682E-13 | 8.03069E-12 | gelsolin                                                                            |
| ENSG00000176788 | 1.91 | 8.37  | 2.67593E-17 | 1.1646E-15  | brain abundant, membrane attached signal protein 1                                  |
| ENSG00000112343 | 1.91 | 6.43  | 1.0637E-16  | 4.33113E-15 | tripartite motif containing 38                                                      |
| ENSG00000234741 | 1.91 | 8.84  | 3.78973E-16 | 1.41704E-14 | growth arrest-specific 5 (non-protein coding)                                       |
| ENSG00000125657 | 1.91 | 4.24  | 6.47963E-06 | 4.11731E-05 | tumor necrosis factor (ligand) superfamily, member 9                                |
| ENSG00000051523 | 1.90 | 8.82  | 7.68454E-15 | 2.53113E-13 | cytochrome b-245, alpha polypeptide                                                 |
| ENSG00000197879 | 1.90 | 5.63  | 1.98778E-16 | 7.82962E-15 | myosin IC                                                                           |
| ENSG00000257529 | 1.89 | 8.18  | 4.67886E-17 | 1.97794E-15 | RPL36A-HNRNPH2 readthrough                                                          |
| ENSG00000110628 | 1.89 | 6.06  | 2.31037E-15 | 8.09177E-14 | solute carrier family 22, member 18                                                 |
| ENSG00000130303 | 1.89 | 8.59  | 9.91333E-17 | 4.07398E-15 | bone marrow stromal cell antigen 2                                                  |
| ENSG00000196369 | 1.88 | 4.76  | 1.36605E-11 | 2.82885E-10 | SLIT-ROBO Rho GTPase activating protein 2B                                          |
| ENSG00000156482 | 1.88 | 10.76 | 3.73863E-10 | 5.98632E-09 | ribosomal protein L30                                                               |
| ENSG00000071082 | 1.88 | 10.73 | 5.01063E-10 | 7.83404E-09 | ribosomal protein L31                                                               |
| ENSG00000089335 | 1.87 | 6.62  | 7.87779E-15 | 2.58197E-13 | zinc finger protein 302                                                             |
| ENSG00000060339 | 1.87 | 8.66  | 4.18576E-12 | 9.32245E-11 | cell division cycle and apoptosis regulator 1                                       |
| ENSG00000115415 | 1.87 | 8.21  | 1.3818E-15  | 4.91742E-14 | signal transducer and activator of transcription 1, 91kDa                           |
| ENSG00000122694 | 1.87 | 6.55  | 6.13971E-12 | 1.34931E-10 | GLI pathogenesis-related 2                                                          |
| ENSG00000090863 | 1.87 | 7.58  | 7.17341E-15 | 2.37456E-13 | golgi glycoprotein 1                                                                |
| ENSG00000115267 | 1.86 | 5.69  | 7.34407E-15 | 2.425E-13   | interferon induced with helicase C domain 1                                         |
| ENSG00000160445 | 1.86 | 5.07  | 4.15184E-12 | 9.26245E-11 | zyg-11 related, cell cycle regulator                                                |
| ENSG00000196209 | 1.86 | 4.67  | 1.1279E-11  | 2.38025E-10 | signal-regulatory protein beta 2                                                    |
| ENSG00000073803 | 1.86 | 4.59  | 7.40391E-12 | 1.6085E-10  | mitogen-activated protein kinase kinase kinase 13                                   |
| ENSG00000125733 | 1.85 | 5.61  | 5.69599E-16 | 2.08849E-14 | thyroid hormone receptor interactor 10                                              |
| ENSG00000166913 | 1.85 | 10.01 | 1.76161E-11 | 3.57002E-10 | tyrosine 3-monooxygenase/tryptophan 5-monooxygenase activation protein, beta        |
| ENSG00000204164 | 1.85 | 5.14  | 3.51707E-11 | 6.75623E-10 | BMS1P5                                                                              |
| ENSG00000114480 | 1.85 | 7.68  | 4.04225E-16 | 1.50299E-14 | glucan (1,4-alpha-), branching enzyme 1                                             |
| ENSG00000169925 | 1.84 | 6.05  | 5.7144E-15  | 1.90108E-13 | bromodomain containing 3                                                            |
| ENSG00000152256 | 1.84 | 4.85  | 9.94849E-10 | 1.45918E-08 | pyruvate dehydrogenase kinase, isozyme 1                                            |
| ENSG00000100918 | 1.84 | 4.75  | 1.92494E-07 | 1.75734E-06 | REC8 meiotic recombination protein                                                  |
| ENSG00000130775 | 1.84 | 6.36  | 3.16322E-16 | 1.20311E-14 | thymocyte selection associated family member 2                                      |
| ENSG00000106404 | 1.84 | 5.73  | 1.53048E-14 | 4.86018E-13 | claudin 15                                                                          |
| ENSG00000168461 | 1.83 | 6.49  | 1.42555E-16 | 5.7516E-15  | RAB31, member RAS oncogene family                                                   |
| ENSG00000141506 | 1.83 | 4.68  | 1.37848E-11 | 2.85014E-10 | phosphoinositide-3-kinase, regulatory subunit 5                                     |
| ENSG00000034713 | 1.83 | 5.85  | 5.68249E-15 | 1.89521E-13 | GABA(A) receptor-associated protein like 2                                          |
| ENSG00000002549 | 1.83 | 7.68  | 3.22916E-17 | 1.39169E-15 | leucine aminopeptidase 3                                                            |
| ENSG00000120594 | 1.83 | 5.16  | 1.14334E-10 | 2.02897E-09 | plexin domain containing 2                                                          |
| ENSG00000174720 | 1.83 | 7.38  | 1.25035E-15 | 4.46159E-14 | La ribonucleoprotein domain family, member 7                                        |
| ENSG00000139182 | 1.82 | 5.42  | 1.78507E-15 | 6.31868E-14 | calsyntenin 3                                                                       |
| ENSG00000068697 | 1.82 | 7.17  | 6.64549E-16 | 2.41677E-14 | lysosomal protein transmembrane 4 alpha                                             |
| ENSG00000183401 | 1.82 | 5.83  | 9.79666E-16 | 3.51462E-14 | coiled-coil domain containing 159                                                   |
| ENSG00000069329 | 1.81 | 7.33  | 4.34839E-18 | 2.09893E-16 | VPS35 retromer complex component                                                    |
| ENSG00000121858 | 1.80 | 5.53  | 1.16864E-12 | 2.85156E-11 | tumor necrosis factor (ligand) superfamily, member 10                               |
| ENSG00000281490 | 1.80 | 4.69  | 5.00117E-11 | 9.25878E-10 | capicua transcriptional repressor pseudogene 14                                     |
| ENSG00000066933 | 1.79 | 5.32  | 3.7216E-14  | 1.12787E-12 | myosin IXA                                                                          |
| ENSG00000137628 | 1.79 | 5.61  | 2.46984E-10 | 4.12386E-09 | DEAD (Asp-Glu-Ala-Asp) box polypeptide 60                                           |
| ENSG00000105939 | 1.79 | 7.49  | 4.37179E-14 | 1.3159E-12  | zinc finger CCCH-type, antiviral 1                                                  |
| ENSG00000121310 | 1.79 | 6.42  | 5.55544E-15 | 1.8575E-13  | enoyl CoA hydratase domain containing 2                                             |
| ENSG00000085117 | 1.78 | 8.46  | 1.60489E-10 | 2.77386E-09 | CD82 molecule                                                                       |
| ENSG00000141096 | 1.78 | 7.74  | 1.41381E-10 | 2.46284E-09 | dipeptidase 3                                                                       |

|                 |      |       |             |             |                                                                                       |
|-----------------|------|-------|-------------|-------------|---------------------------------------------------------------------------------------|
| ENSG00000142156 | 1.78 | 4.59  | 7.59678E-05 | 0.000367492 | collagen, type VI, alpha 1                                                            |
| ENSG00000197756 | 1.77 | 10.70 | 2.29111E-09 | 3.14176E-08 | ribosomal protein L37a                                                                |
| ENSG00000160352 | 1.77 | 4.87  | 2.12193E-09 | 2.92487E-08 | zinc finger protein 714                                                               |
| ENSG00000204138 | 1.76 | 6.80  | 4.94596E-16 | 1.82369E-14 | phosphatase and actin regulator 4                                                     |
| ENSG00000136819 | 1.76 | 7.98  | 2.656E-15   | 9.22926E-14 | chromosome 9 open reading frame 78                                                    |
| ENSG00000153029 | 1.76 | 6.71  | 1.3753E-16  | 5.56578E-15 | major histocompatibility complex, class I-related                                     |
| ENSG00000149187 | 1.75 | 8.57  | 1.74496E-14 | 5.50181E-13 | CUGBP, Elav-like family member 1                                                      |
| ENSG00000166888 | 1.74 | 9.40  | 8.52167E-12 | 1.83037E-10 | signal transducer and activator of transcription 6, interleukin-4 induced             |
| ENSG00000214176 | 1.74 | 4.86  | 1.28094E-11 | 2.65675E-10 | pleckstrin homology domain containing, family M (with RUN domain) member 1 pseudogene |
| ENSG00000175061 | 1.74 | 9.24  | 3.20332E-11 | 6.19837E-10 | LRRC75A antisense RNA 1                                                               |
| ENSG00000170525 | 1.73 | 5.60  | 4.98846E-13 | 1.28327E-11 | 6-phosphofructo-2-kinase/fructose-2,6-bisphosphatase 3                                |
| ENSG00000121289 | 1.73 | 4.29  | 3.32769E-09 | 4.43492E-08 | centrosomal protein 89kDa                                                             |
| ENSG00000077380 | 1.73 | 7.78  | 8.28611E-16 | 3.00519E-14 | dynein, cytoplasmic 1, intermediate chain 2                                           |
| ENSG00000133112 | 1.73 | 11.92 | 3.68083E-07 | 3.14613E-06 | tumor protein, translationally-controlled 1                                           |
| ENSG00000178695 | 1.72 | 6.18  | 2.0075E-12  | 4.69146E-11 | potassium channel tetramerization domain containing 12                                |
| ENSG00000131669 | 1.72 | 4.72  | 1.30211E-10 | 2.28628E-09 | ninjurin 1                                                                            |
| ENSG00000143771 | 1.72 | 7.08  | 4.68716E-11 | 2.26692E-12 | cornichon family AMPA receptor auxiliary protein 4                                    |
| ENSG00000158270 | 1.72 | 4.83  | 0.001313284 | 0.004444808 | collectin sub-family member 12                                                        |
| ENSG00000109390 | 1.72 | 6.72  | 2.43069E-15 | 8.46851E-14 | NADH dehydrogenase (ubiquinone) 1, subcomplex unknown, 1, 6kDa                        |
| ENSG00000276701 | 1.71 | 7.14  | 2.74652E-16 | 1.05368E-14 | macrophage migration inhibitory factor (glycosylation-inhibiting factor)              |
| ENSG00000105639 | 1.71 | 5.03  | 4.46763E-11 | 8.36436E-10 | Janus kinase 3                                                                        |
| ENSG00000185432 | 1.71 | 5.83  | 0.000161856 | 0.000717113 | methyltransferase like 7A                                                             |
| ENSG00000160991 | 1.70 | 6.42  | 4.58282E-11 | 8.55589E-10 | ORAI calcium release-activated calcium modulator 2                                    |
| ENSG00000128524 | 1.70 | 8.25  | 4.67728E-14 | 1.40149E-12 | ATPase, H+ transporting, lysosomal 14kDa, V1 subunit F                                |
| ENSG00000110002 | 1.70 | 5.76  | 0.001049471 | 0.003656347 | von Willebrand factor A domain containing 5A                                          |
| ENSG00000163171 | 1.69 | 8.35  | 1.01202E-09 | 1.48274E-08 | CDC42 effector protein (Rho GTPase binding) 3                                         |
| ENSG00000166803 | 1.69 | 7.40  | 3.26262E-10 | 5.28791E-09 | KIAA0101                                                                              |
| ENSG00000143891 | 1.68 | 5.19  | 9.87016E-06 | 6.00442E-05 | galactose mutarotase (aldose 1-epimerase)                                             |
| ENSG00000008988 | 1.68 | 10.88 | 2.35498E-08 | 2.60935E-07 | ribosomal protein S20                                                                 |
| ENSG00000162735 | 1.68 | 6.25  | 1.07715E-07 | 1.04137E-06 | peroxisomal biogenesis factor 19                                                      |
| ENSG00000102921 | 1.68 | 5.33  | 4.67031E-13 | 1.20845E-11 | NEDD4 binding protein 1                                                               |
| ENSG00000068489 | 1.68 | 5.18  | 1.73505E-09 | 2.4449E-08  | proline rich 11                                                                       |
| ENSG00000212338 | 1.68 | 6.37  | 1.50889E-13 | 4.20777E-12 | Small nucleolar RNA SNORA67                                                           |
| ENSG00000135046 | 1.68 | 7.84  | 1.3403E-14  | 4.28701E-13 | annexin A1                                                                            |
| ENSG00000070190 | 1.68 | 5.07  | 8.97573E-11 | 1.61223E-09 | dual adaptor of phosphotyrosine and 3-phosphoinositides                               |
| ENSG00000083444 | 1.67 | 7.99  | 7.79041E-13 | 1.94015E-11 | procollagen-lysine, 2-oxoglutarate 5-dioxygenase 1                                    |
| ENSG00000232388 | 1.67 | 5.19  | 3.86346E-12 | 8.66276E-11 | long intergenic non-protein coding RNA 493                                            |
| ENSG00000103066 | 1.66 | 5.05  | 1.03162E-10 | 1.84236E-09 | phospholipase A2, group XV                                                            |
| ENSG00000112715 | 1.66 | 8.11  | 0.00024504  | 0.001030302 | vascular endothelial growth factor A                                                  |
| ENSG00000101040 | 1.66 | 6.68  | 1.07265E-08 | 1.29912E-07 | zinc finger, MYND-type containing 8                                                   |
| ENSG00000113811 | 1.66 | 5.94  | 3.13434E-13 | 8.33773E-12 | selenoprotein K                                                                       |
| ENSG00000185068 | 1.65 | 5.73  | 1.52122E-12 | 3.63178E-11 | GTF2H5                                                                                |
| ENSG00000186468 | 1.65 | 10.27 | 2.00113E-08 | 2.25493E-07 | ribosomal protein S23                                                                 |
| ENSG00000164733 | 1.64 | 10.13 | 4.73642E-07 | 3.96164E-06 | cathepsin B                                                                           |
| ENSG00000127663 | 1.64 | 6.94  | 4.93494E-14 | 1.47205E-12 | lysine (K)-specific demethylase 4B                                                    |
| ENSG00000223960 | 1.64 | 5.10  | 7.84313E-07 | 6.26789E-06 | AC009948.5                                                                            |
| ENSG00000105647 | 1.64 | 6.84  | 1.84931E-06 | 1.33629E-05 | phosphoinositide-3-kinase, regulatory subunit 2 (beta)                                |
| ENSG00000162909 | 1.64 | 7.13  | 3.62787E-15 | 1.23478E-13 | calpain 2, (mII) large subunit                                                        |
| ENSG00000164687 | 1.63 | 8.08  | 0.001207109 | 0.004126493 | fatty acid binding protein 5 (psoriasis-associated)                                   |
| ENSG00000254635 | 1.63 | 5.46  | 1.21774E-11 | 2.54156E-10 | WAC antisense RNA 1 (head to head)                                                    |
| ENSG00000198918 | 1.63 | 9.79  | 5.19088E-10 | 8.10632E-09 | ribosomal protein L39                                                                 |
| ENSG00000174428 | 1.63 | 4.94  | 1.62453E-08 | 1.86379E-07 | GTF2I repeat domain containing 2B                                                     |
| ENSG00000172530 | 1.63 | 4.52  | 4.56431E-09 | 5.9457E-08  | BTG3 associated nuclear protein                                                       |
| ENSG00000137145 | 1.63 | 5.40  | 1.4512E-11  | 2.98655E-10 | DENN/MADD domain containing 4C                                                        |
| ENSG00000100439 | 1.63 | 4.42  | 1.94732E-08 | 2.19989E-07 | abhydrolase domain containing 4                                                       |
| ENSG00000132256 | 1.63 | 5.20  | 8.09043E-12 | 1.74622E-10 | tripartite motif containing 5                                                         |
| ENSG00000265972 | 1.62 | 9.04  | 2.95208E-11 | 5.75418E-10 | thioredoxin interacting protein                                                       |
| ENSG00000245910 | 1.62 | 7.28  | 1.08129E-14 | 3.49221E-13 | small nucleolar RNA host gene 6                                                       |
| ENSG00000067066 | 1.62 | 6.31  | 1.51522E-12 | 3.62396E-11 | SP100 nuclear antigen                                                                 |
| ENSG00000166681 | 1.62 | 5.40  | 2.18615E-05 | 0.000121571 | nerve growth factor receptor (TNFRSF16) associated protein 1                          |
| ENSG00000117475 | 1.61 | 4.73  | 9.5875E-10  | 1.41562E-08 | basic leucine zipper nuclear factor 1                                                 |
| ENSG00000125691 | 1.61 | 10.19 | 7.22333E-09 | 8.97777E-08 | ribosomal protein L23                                                                 |
| ENSG00000168172 | 1.61 | 6.79  | 2.76977E-09 | 3.7478E-08  | hook microtubule-tethering protein 3                                                  |
| ENSG0000010278  | 1.61 | 5.58  | 7.8664E-06  | 4.90458E-05 | CD9 molecule                                                                          |
| ENSG00000173214 | 1.61 | 5.10  | 9.70054E-11 | 1.74007E-09 | KIAA1919                                                                              |
| ENSG00000126860 | 1.60 | 6.12  | 2.87754E-12 | 6.54048E-11 | ecotropic viral integration site 2A                                                   |
| ENSG00000167419 | 1.60 | 4.79  | 8.5671E-06  | 5.29421E-05 | lactoperoxidase                                                                       |
| ENSG00000118263 | 1.60 | 4.22  | 5.18774E-07 | 4.29583E-06 | Kruppel-like factor 7 (ubiquitous)                                                    |
| ENSG00000235823 | 1.60 | 4.81  | 1.3213E-05  | 7.76746E-05 | oligodendrocyte maturation-associated long intergenic non-coding RNA                  |
| ENSG00000111859 | 1.60 | 5.15  | 1.01975E-10 | 1.82429E-09 | neural precursor cell expressed, developmentally down-regulated 9                     |
| ENSG00000089041 | 1.60 | 5.02  | 8.89452E-06 | 5.47108E-05 | purinergic receptor P2X, ligand gated ion channel, 7                                  |
| ENSG00000125810 | 1.60 | 8.53  | 6.43459E-12 | 1.41178E-10 | CD93 molecule                                                                         |



|                 |      |       |             |             |                                                                             |
|-----------------|------|-------|-------------|-------------|-----------------------------------------------------------------------------|
| ENSG00000113494 | 1.59 | 5.09  | 8.21423E-10 | 1.23344E-08 | prolactin receptor                                                          |
| ENSG00000163993 | 1.59 | 6.22  | 2.84226E-05 | 0.000153429 | S100 calcium binding protein P                                              |
| ENSG00000124831 | 1.59 | 8.28  | 3.39556E-10 | 5.47092E-09 | leucine rich repeat (in FLII) interacting protein 1                         |
| ENSG00000170581 | 1.59 | 7.80  | 1.53299E-09 | 2.16939E-08 | signal transducer and activator of transcription 2, 113kDa                  |
| ENSG00000056972 | 1.59 | 4.66  | 4.23071E-09 | 5.54377E-08 | TRAF3 interacting protein 2                                                 |
| ENSG00000218739 | 1.59 | 5.02  | 6.82418E-10 | 1.0424E-08  | CEBPZ opposite strand                                                       |
| ENSG00000204272 | 1.58 | 4.66  | 3.05576E-09 | 4.09305E-08 | RP11-622K12.1                                                               |
| ENSG00000176845 | 1.58 | 5.89  | 7.7017E-12  | 1.66774E-10 | meteorin, glial cell differentiation regulator-like                         |
| ENSG00000185880 | 1.58 | 4.70  | 2.08774E-07 | 1.89294E-06 | tripartite motif containing 69                                              |
| ENSG00000156587 | 1.58 | 6.29  | 1.92096E-10 | 3.27748E-09 | ubiquitin-conjugating enzyme E2L 6                                          |
| ENSG00000101347 | 1.58 | 8.70  | 3.50219E-10 | 5.63492E-09 | SAM domain and HD domain 1                                                  |
| ENSG00000159792 | 1.58 | 4.90  | 5.93627E-05 | 0.000295788 | protein serine kinase H1                                                    |
| ENSG00000103995 | 1.58 | 5.96  | 1.44143E-12 | 3.45995E-11 | centrosomal protein 152kDa                                                  |
| ENSG00000226710 | 1.57 | 7.92  | 8.17519E-10 | 1.22896E-08 | chromosome 6 open reading frame 48                                          |
| ENSG0000025708  | 1.57 | 6.35  | 7.04702E-07 | 5.68939E-06 | thymidine phosphorylase                                                     |
| ENSG00000115548 | 1.57 | 6.72  | 5.51853E-13 | 1.40601E-11 | lysine (K)-specific demethylase 3A                                          |
| ENSG00000070214 | 1.57 | 7.91  | 3.88354E-12 | 8.68911E-11 | solute carrier family 44 (choline transporter), member 1                    |
| ENSG00000188243 | 1.56 | 7.50  | 4.37008E-13 | 1.13979E-11 | COMM domain containing 6                                                    |
| ENSG00000132024 | 1.56 | 6.19  | 2.37946E-12 | 5.49304E-11 | coiled-coil and C2 domain containing 1A                                     |
| ENSG00000168056 | 1.56 | 4.78  | 2.42308E-08 | 2.67587E-07 | latent transforming growth factor beta binding protein 3                    |
| ENSG00000125482 | 1.56 | 5.35  | 2.30758E-11 | 4.60614E-10 | transcription termination factor, RNA polymerase I                          |
| ENSG00000109099 | 1.56 | 4.99  | 2.27493E-05 | 0.000125875 | peripheral myelin protein 22                                                |
| ENSG00000130066 | 1.55 | 7.25  | 7.68017E-12 | 1.65018E-10 | spermidine/spermine N1-acetyltransferase 1                                  |
| ENSG00000171617 | 1.55 | 5.75  | 2.72428E-11 | 5.32578E-10 | ectodermal-neural cortex 1 (with BTB domain)                                |
| ENSG00000138814 | 1.55 | 7.20  | 4.37059E-13 | 1.13979E-11 | protein phosphatase 3, catalytic subunit, alpha isozyme                     |
| ENSG00000148660 | 1.54 | 6.65  | 1.25862E-12 | 3.05428E-11 | calcium/calmodulin-dependent protein kinase II gamma                        |
| ENSG00000168528 | 1.54 | 7.29  | 1.58276E-13 | 4.39532E-12 | serine incorporator 2                                                       |
| ENSG00000138398 | 1.54 | 7.68  | 5.08329E-12 | 1.12272E-10 | peptidylprolyl isomerase G (cyclophilin G)                                  |
| ENSG00000111596 | 1.53 | 6.79  | 1.73328E-12 | 4.08659E-11 | CCR4-NOT transcription complex, subunit 2                                   |
| ENSG00000135686 | 1.53 | 5.31  | 3.55848E-11 | 6.81606E-10 | kelch-like family member 36                                                 |
| ENSG00000081189 | 1.53 | 5.14  | 1.19091E-05 | 7.0984E-05  | myocyte enhancer factor 2C                                                  |
| ENSG00000134419 | 1.53 | 9.98  | 1.42405E-08 | 1.66707E-07 | ribosomal protein S15a                                                      |
| ENSG00000251562 | 1.52 | 5.57  | 2.98897E-11 | 5.80902E-10 | metastasis associated lung adenocarcinoma transcript 1 (non-protein coding) |
| ENSG00000089159 | 1.52 | 4.66  | 7.75149E-09 | 9.59826E-08 | paxillin                                                                    |
| ENSG00000141012 | 1.52 | 5.57  | 6.56019E-11 | 1.19615E-09 | galactosamine (N-acetyl)-6-sulfatase                                        |
| ENSG00000104998 | 1.52 | 4.92  | 1.88374E-08 | 2.13169E-07 | interleukin 27 receptor, alpha                                              |
| ENSG00000164609 | 1.52 | 6.35  | 1.04999E-11 | 2.21935E-10 | SLU7 splicing factor homolog (S. cerevisiae)                                |
| ENSG00000243749 | 1.51 | 5.16  | 5.85617E-05 | 0.000292446 | ZMYM6 neighbor                                                              |
| ENSG00000187243 | 1.51 | 4.69  | 1.2469E-08  | 1.48044E-07 | melanoma antigen family D4B                                                 |
| ENSG00000146425 | 1.51 | 5.59  | 1.30887E-09 | 1.87422E-08 | dynein, light chain, Tctex-type 1                                           |
| ENSG00000103121 | 1.51 | 5.09  | 2.73624E-09 | 3.71379E-08 | C-x(9)-C motif containing 2                                                 |
| ENSG00000134138 | 1.50 | 5.12  | 5.7074E-09  | 7.23592E-08 | Meis homeobox 2                                                             |
| ENSG00000265148 | 1.50 | 4.99  | 1.37411E-09 | 1.96129E-08 | BZRAP1 antisense RNA 1                                                      |
| ENSG00000165030 | 1.49 | 5.54  | 4.2398E-11  | 7.98285E-10 | nuclear factor, interleukin 3 regulated                                     |
| ENSG00000121060 | 1.49 | 7.70  | 2.13021E-12 | 4.95209E-11 | tripartite motif containing 25                                              |
| ENSG00000103018 | 1.49 | 6.98  | 3.8883E-12  | 8.68911E-11 | cytochrome b5 type B (outer mitochondrial membrane)                         |
| ENSG00000163840 | 1.49 | 6.40  | 3.75896E-11 | 7.14848E-10 | deltex 3 like, E3 ubiquitin ligase                                          |
| ENSG00000151366 | 1.49 | 8.00  | 1.8725E-12  | 4.39144E-11 | NADH dehydrogenase (ubiquinone) 1, subcomplex unknown, 2, 14.5kDa           |
| ENSG00000132432 | 1.49 | 6.76  | 8.74474E-12 | 1.87525E-10 | Sec61 gamma subunit                                                         |
| ENSG00000106771 | 1.49 | 6.62  | 1.07673E-08 | 1.30287E-07 | transmembrane protein 245                                                   |
| ENSG00000160691 | 1.48 | 6.85  | 6.6962E-12  | 1.46434E-10 | SHC (Src homology 2 domain containing) transforming protein 1               |
| ENSG00000099977 | 1.48 | 5.76  | 1.82362E-11 | 3.68444E-10 | D-dopachrome tautomerase                                                    |
| ENSG00000181523 | 1.48 | 4.91  | 6.7799E-07  | 5.50032E-06 | N-sulfoglucosamine sulfohydrolase                                           |
| ENSG00000011422 | 1.48 | 6.26  | 2.75859E-09 | 3.73788E-08 | plasminogen activator, urokinase receptor                                   |
| ENSG00000100055 | 1.48 | 4.89  | 7.27853E-06 | 4.57675E-05 | cytohesin 4                                                                 |
| ENSG00000164125 | 1.48 | 4.76  | 7.94448E-05 | 0.000381945 | family with sequence similarity 198, member B                               |
| ENSG00000039523 | 1.48 | 5.15  | 4.75713E-10 | 7.45526E-09 | family with sequence similarity 65, member A                                |
| ENSG00000142534 | 1.48 | 10.95 | 1.42843E-06 | 1.06283E-05 | ribosomal protein S11                                                       |
| ENSG00000188021 | 1.48 | 5.66  | 2.72997E-10 | 4.50717E-09 | ubiquilin 2                                                                 |
| ENSG00000131446 | 1.48 | 7.62  | 2.94106E-09 | 3.95137E-08 | mannosyl (alpha-1,3-)-glycoprotein beta-1,2-N-acetylglucosaminyltransferase |
| ENSG00000134825 | 1.47 | 7.51  | 1.54955E-11 | 3.16828E-10 | transmembrane protein 258                                                   |
| ENSG00000106948 | 1.47 | 7.26  | 1.8705E-12  | 4.39144E-11 | AT-hook transcription factor                                                |
| ENSG00000187098 | 1.47 | 4.55  | 2.77147E-07 | 2.42829E-06 | microphthalmia-associated transcription factor                              |
| ENSG00000257923 | 1.47 | 6.69  | 1.80384E-10 | 3.10157E-09 | cut-like homeobox 1                                                         |
| ENSG00000118181 | 1.47 | 10.18 | 1.61044E-07 | 1.50119E-06 | ribosomal protein S25                                                       |
| ENSG00000228474 | 1.47 | 7.55  | 1.83623E-12 | 4.32166E-11 | oligosaccharyltransferase complex subunit 4 (non-catalytic)                 |
| ENSG00000104731 | 1.47 | 5.67  | 2.67426E-10 | 4.42069E-09 | kelch domain containing 4                                                   |
| ENSG00000177981 | 1.47 | 5.33  | 1.21684E-09 | 1.74998E-08 | ankyrin repeat and SOCS box containing 8                                    |
| ENSG00000067057 | 1.46 | 6.35  | 4.32841E-11 | 8.12664E-10 | phosphofructokinase, platelet                                               |
| ENSG00000118267 | 1.46 | 5.74  | 5.21716E-11 | 9.63179E-10 | ZNF271                                                                      |
| ENSG00000143226 | 1.45 | 5.81  | 8.68524E-07 | 6.86237E-06 | Fc fragment of IgG, low affinity IIa, receptor (CD32)                       |
| ENSG00000172936 | 1.45 | 7.30  | 1.18129E-11 | 2.48502E-10 | myeloid differentiation primary response 88                                 |

|                 |      |       |             |             |                                                                                    |
|-----------------|------|-------|-------------|-------------|------------------------------------------------------------------------------------|
| ENSG00000069966 | 1.45 | 4.99  | 3.4571E-08  | 3.71274E-07 | guanine nucleotide binding protein (G protein), beta 5                             |
| ENSG00000014914 | 1.45 | 4.92  | 3.92386E-07 | 3.33239E-06 | myotubularin related protein 11                                                    |
| ENSG00000078124 | 1.44 | 7.01  | 5.69527E-12 | 1.25372E-10 | alkaline ceramidase 3                                                              |
| ENSG00000132823 | 1.44 | 5.52  | 4.66877E-10 | 7.34281E-09 | oxidative stress responsive serine-rich 1                                          |
| ENSG00000123360 | 1.44 | 5.11  | 1.88656E-09 | 2.63879E-08 | phosphodiesterase 1B, calmodulin-dependent                                         |
| ENSG00000027697 | 1.44 | 7.56  | 1.19843E-11 | 2.51533E-10 | interferon gamma receptor 1                                                        |
| ENSG00000119801 | 1.44 | 5.23  | 5.95197E-10 | 9.19749E-09 | yippee-like 5                                                                      |
| ENSG00000134107 | 1.44 | 7.32  | 6.31818E-10 | 9.70688E-09 | basic helix-loop-helix family, member e40                                          |
| ENSG00000104921 | 1.44 | 6.17  | 4.46819E-07 | 3.75384E-06 | Fc fragment of IgE, low affinity II, receptor for (CD23)                           |
| ENSG00000028137 | 1.43 | 7.49  | 1.88183E-11 | 3.79626E-10 | tumor necrosis factor receptor superfamily, member 1B                              |
| ENSG00000105355 | 1.43 | 8.13  | 2.49273E-11 | 4.92388E-10 | perilipin 3                                                                        |
| ENSG00000109475 | 1.43 | 9.76  | 1.18772E-07 | 1.13997E-06 | ribosomal protein L34                                                              |
| ENSG00000255439 | 1.43 | 4.87  | 5.3073E-08  | 5.48242E-07 | Uncharacterized protein                                                            |
| ENSG00000137575 | 1.43 | 8.34  | 7.29796E-11 | 1.32521E-09 | syndecan binding protein (syntenin)                                                |
| ENSG00000168273 | 1.43 | 4.40  | 9.85757E-08 | 9.59306E-07 | small integral membrane protein 4                                                  |
| ENSG00000086065 | 1.43 | 6.77  | 4.1832E-11  | 7.90995E-10 | charged multivesicular body protein 5                                              |
| ENSG00000205542 | 1.43 | 12.33 | 4.92893E-05 | 0.000251351 | thymosin beta 4, X-linked                                                          |
| ENSG00000105193 | 1.42 | 10.17 | 4.0735E-07  | 3.44405E-06 | ribosomal protein S16                                                              |
| ENSG00000163220 | 1.42 | 10.12 | 9.80832E-06 | 5.96954E-05 | S100 calcium binding protein A9                                                    |
| ENSG00000168404 | 1.42 | 5.65  | 2.78525E-10 | 4.58134E-09 | mixed lineage kinase domain-like                                                   |
| ENSG00000085719 | 1.42 | 4.69  | 2.33695E-07 | 2.09458E-06 | copine III                                                                         |
| ENSG00000157895 | 1.41 | 4.80  | 7.66089E-08 | 7.698E-07   | chromosome 12 open reading frame 43                                                |
| ENSG00000140199 | 1.41 | 4.42  | 2.02477E-08 | 1.83961E-06 | solute carrier family 12 (potassium/chloride transporter), member 6                |
| ENSG00000137818 | 1.41 | 11.23 | 5.47636E-06 | 3.5391E-05  | ribosomal protein, large, P1                                                       |
| ENSG00000272657 | 1.41 | 4.24  | 4.41232E-07 | 3.70925E-06 | AP000320.7                                                                         |
| ENSG00000164587 | 1.41 | 10.05 | 6.23891E-07 | 5.1089E-06  | ribosomal protein S14                                                              |
| ENSG00000131981 | 1.41 | 4.83  | 2.72244E-08 | 2.97429E-07 | lectin, galactoside-binding, soluble, 3                                            |
| ENSG00000254995 | 1.41 | 4.64  | 9.68052E-08 | 9.44153E-07 | STX16-NPEPL1 readthrough (NMD candidate)                                           |
| ENSG00000095951 | 1.41 | 4.71  | 8.75641E-08 | 8.64826E-07 | human immunodeficiency virus type I enhancer binding protein 1                     |
| ENSG00000133816 | 1.41 | 4.79  | 4.63534E-08 | 4.83722E-07 | microtubule associated monooxygenase, calponin and LIM domain containing 2         |
| ENSG00000144802 | 1.41 | 5.29  | 5.77981E-08 | 5.92899E-07 | nuclear factor of kappa light polypeptide gene enhancer in B-cells inhibitor, zeta |
| ENSG00000270106 | 1.40 | 4.25  | 6.88552E-07 | 5.56968E-06 | TSNAX-DISC1 readthrough (NMD candidate)                                            |
| ENSG00000196123 | 1.40 | 5.04  | 1.15959E-08 | 1.3867E-07  | KIAA0895-like                                                                      |
| ENSG00000115561 | 1.40 | 7.07  | 1.32254E-10 | 2.31602E-09 | charged multivesicular body protein 3                                              |
| ENSG00000266714 | 1.40 | 7.40  | 3.4447E-09  | 4.57249E-08 | myosin XVb                                                                         |
| ENSG00000101132 | 1.40 | 5.13  | 1.90991E-07 | 1.74722E-06 | prefoldin subunit 4                                                                |
| ENSG00000124370 | 1.40 | 4.60  | 7.85653E-08 | 7.86482E-07 | methylmalonyl CoA epimerase                                                        |
| ENSG00000156052 | 1.40 | 8.24  | 2.84444E-10 | 4.66137E-09 | guanine nucleotide binding protein (G protein), q polypeptide                      |
| ENSG00000119950 | 1.39 | 5.06  | 5.95135E-07 | 4.88548E-06 | MAX interactor 1, dimerization protein                                             |
| ENSG00000163319 | 1.39 | 6.60  | 1.15599E-10 | 2.04867E-09 | mitochondrial ribosomal protein S18C                                               |
| ENSG00000161970 | 1.39 | 9.39  | 3.72845E-08 | 3.96884E-07 | ribosomal protein L26                                                              |
| ENSG00000197747 | 1.39 | 7.52  | 5.76146E-11 | 1.05778E-09 | S100 calcium binding protein A10                                                   |
| ENSG00000186318 | 1.39 | 5.08  | 4.42517E-08 | 4.64346E-07 | beta-site APP-cleaving enzyme 1                                                    |
| ENSG00000204364 | 1.39 | 5.62  | 4.67759E-05 | 0.000240102 | complement component 2                                                             |
| ENSG00000158006 | 1.39 | 4.65  | 1.75995E-07 | 1.62572E-06 | platelet-activating factor acetylhydrolase 2, 40kDa                                |
| ENSG00000088970 | 1.39 | 4.64  | 2.32554E-07 | 2.08576E-06 | kizuna centrosomal protein                                                         |
| ENSG00000114737 | 1.38 | 5.90  | 1.91421E-07 | 1.74874E-06 | cytokine inducible SH2-containing protein                                          |
| ENSG00000115738 | 1.38 | 7.94  | 1.35169E-10 | 2.36083E-09 | inhibitor of DNA binding 2, dominant negative helix-loop-helix protein             |
| ENSG00000257341 | 1.38 | 4.81  | 6.44822E-05 | 0.000318429 | cysteine-rich protein 1 (intestinal)                                               |
| ENSG00000160710 | 1.38 | 8.79  | 2.679E-09   | 3.63982E-08 | adenosine deaminase, RNA-specific                                                  |
| ENSG00000142347 | 1.38 | 9.51  | 3.72116E-08 | 3.96426E-07 | myosin IF                                                                          |
| ENSG00000121552 | 1.38 | 7.86  | 3.38684E-10 | 5.46921E-09 | cystatin A (stefin A)                                                              |
| ENSG00000198258 | 1.38 | 7.90  | 1.1771E-10  | 2.0833E-09  | ubiquitin-like 5                                                                   |
| ENSG00000136816 | 1.38 | 5.95  | 1.43925E-08 | 1.68174E-07 | torsin family 1, member B (torsin B)                                               |
| ENSG00000243147 | 1.37 | 7.86  | 9.4719E-09  | 1.15561E-07 | mitochondrial ribosomal protein L33                                                |
| ENSG00000119720 | 1.37 | 5.47  | 1.36231E-08 | 1.60597E-07 | NRDE-2, necessary for RNA interference, domain containing                          |
| ENSG00000115866 | 1.37 | 8.17  | 2.23782E-10 | 3.77445E-09 | aspartyl-tRNA synthetase                                                           |
| ENSG00000276276 | 1.37 | 4.34  | 3.02521E-06 | 2.08931E-05 | ADP-ribosylation factor-like 17B                                                   |
| ENSG00000224152 | 1.36 | 4.52  | 6.47212E-07 | 5.27708E-06 | AC009506.1                                                                         |
| ENSG00000143553 | 1.36 | 5.57  | 2.78976E-09 | 3.771E-08   | SNAP-associated protein                                                            |
| ENSG00000124172 | 1.36 | 8.31  | 5.63476E-10 | 8.7583E-09  | ATP synthase, H+ transporting, mitochondrial F1 complex, epsilon subunit           |
| ENSG00000105374 | 1.36 | 8.50  | 7.90748E-09 | 9.78228E-08 | natural killer cell granule protein 7                                              |
| ENSG00000186174 | 1.36 | 4.42  | 2.36264E-06 | 1.67441E-05 | B-cell CLL/lymphoma 9-like                                                         |
| ENSG00000169860 | 1.36 | 6.09  | 1.9709E-09  | 2.73372E-08 | purinergic receptor P2Y, G-protein coupled, 1                                      |
| ENSG00000159399 | 1.36 | 7.72  | 8.52735E-08 | 8.44086E-07 | hexokinase 2                                                                       |
| ENSG00000113810 | 1.36 | 9.87  | 3.93074E-07 | 3.33611E-06 | structural maintenance of chromosomes 4                                            |
| ENSG00000122026 | 1.36 | 11.82 | 4.86501E-05 | 0.000248473 | ribosomal protein L21                                                              |
| ENSG00000189043 | 1.36 | 7.89  | 5.15498E-09 | 6.59221E-08 | NDUFA4, mitochondrial complex associated                                           |
| ENSG00000143382 | 1.36 | 6.21  | 8.64235E-10 | 1.28897E-08 | ADAMTS-like 4                                                                      |
| ENSG00000167461 | 1.36 | 7.08  | 3.6573E-09  | 4.83536E-08 | RAB8A, member RAS oncogene family                                                  |
| ENSG00000214022 | 1.36 | 5.77  | 0.000239189 | 0.001009218 | replication initiator 1                                                            |
| ENSG00000185722 | 1.36 | 4.77  | 1.23874E-07 | 1.18442E-06 | ankyrin repeat and FYVE domain containing 1                                        |

|                 |      |       |             |             |                                                                                         |
|-----------------|------|-------|-------------|-------------|-----------------------------------------------------------------------------------------|
| ENSG00000090339 | 1.35 | 4.57  | 2.07624E-07 | 1.8838E-06  | intercellular adhesion molecule 1                                                       |
| ENSG00000166147 | 1.35 | 4.92  | 0.000705924 | 0.002598818 | fibrillin 1                                                                             |
| ENSG00000117523 | 1.35 | 8.94  | 9.82113E-09 | 1.19382E-07 | proline-rich coiled-coil 2C                                                             |
| ENSG00000169756 | 1.35 | 7.15  | 2.17529E-10 | 3.67364E-09 | LIM and senescent cell antigen-like domains 1                                           |
| ENSG00000177917 | 1.35 | 6.43  | 5.2784E-09  | 6.72413E-08 | ADP-ribosylation factor-like 6 interacting protein 6                                    |
| ENSG00000143545 | 1.35 | 6.19  | 1.33936E-08 | 1.5824E-07  | RAB13, member RAS oncogene family                                                       |
| ENSG00000100097 | 1.35 | 9.03  | 3.83918E-08 | 4.0769E-07  | lectin, galactoside-binding, soluble, 1                                                 |
| ENSG00000237945 | 1.35 | 4.72  | 6.54381E-05 | 0.000322909 | long intergenic non-protein coding RNA 649                                              |
| ENSG00000111640 | 1.35 | 12.00 | 7.05425E-05 | 0.000344385 | glyceraldehyde-3-phosphate dehydrogenase                                                |
| ENSG00000186812 | 1.34 | 4.50  | 4.40977E-07 | 3.70925E-06 | zinc finger protein 397                                                                 |
| ENSG00000065518 | 1.34 | 7.27  | 1.21414E-10 | 2.14315E-09 | NADH dehydrogenase (ubiquinone) 1 beta subcomplex, 4, 15kDa                             |
| ENSG00000168275 | 1.34 | 6.21  | 8.69769E-10 | 1.29432E-08 | cytochrome c oxidase assembly factor 6                                                  |
| ENSG00000125977 | 1.34 | 8.33  | 9.87437E-08 | 9.59534E-07 | eukaryotic translation initiation factor 2, subunit 2 beta, 38kDa                       |
| ENSG00000144791 | 1.34 | 6.58  | 6.86255E-10 | 1.04705E-08 | LIM domains containing 1                                                                |
| ENSG00000206573 | 1.34 | 5.15  | 3.1164E-08  | 3.36866E-07 | THUMP3 antisense RNA 1                                                                  |
| ENSG00000240344 | 1.33 | 5.48  | 3.74416E-08 | 3.97918E-07 | peptidylprolyl isomerase (cyclophilin)-like 3                                           |
| ENSG00000188559 | 1.33 | 5.54  | 5.24876E-07 | 4.33824E-06 | Ral GTPase activating protein, alpha subunit 2 (catalytic)                              |
| ENSG00000175482 | 1.33 | 4.89  | 2.50014E-07 | 2.22134E-06 | polymerase (DNA-directed), delta 4, accessory subunit                                   |
| ENSG00000134970 | 1.33 | 4.56  | 0.00587658  | 0.002209167 | transmembrane emp24 protein transport domain containing 7                               |
| ENSG00000131507 | 1.33 | 4.98  | 0.000194188 | 0.000839424 | Nedd4 family interacting protein 1                                                      |
| ENSG00000231500 | 1.33 | 11.22 | 5.25566E-05 | 0.000265964 | ribosomal protein S18                                                                   |
| ENSG00000101608 | 1.33 | 9.57  | 2.41426E-07 | 2.15369E-06 | myosin, light chain 12A, regulatory, non-sarcomeric                                     |
| ENSG00000187210 | 1.33 | 5.80  | 5.07599E-09 | 6.51002E-08 | glucosaminyl (N-acetyl) transferase 1, core 2                                           |
| ENSG00000180964 | 1.33 | 5.35  | 3.25472E-08 | 3.50107E-07 | transcription elongation factor A (SII)-like 8                                          |
| ENSG00000118260 | 1.32 | 5.59  | 6.19779E-09 | 7.82773E-08 | cAMP responsive element binding protein 1                                               |
| ENSG00000105829 | 1.32 | 5.21  | 1.14622E-08 | 1.37443E-07 | Bet1 golgi vesicular membrane trafficking protein                                       |
| ENSG00000163975 | 1.32 | 5.77  | 4.8526E-05  | 0.000136151 | antigen p97 (melanoma associated) identified by monoclonal antibodies 133.2 and 96.5    |
| ENSG00000169032 | 1.32 | 6.60  | 1.01968E-09 | 1.49066E-08 | mitogen-activated protein kinase kinase 1                                               |
| ENSG00000196683 | 1.32 | 6.95  | 8.67589E-10 | 1.29252E-08 | translocase of outer mitochondrial membrane 7 homolog (yeast)                           |
| ENSG00000070814 | 1.32 | 7.23  | 4.06242E-09 | 5.33907E-08 | Treacher Collins-Franceschetti syndrome 1                                               |
| ENSG00000111275 | 1.32 | 5.64  | 6.97245E-09 | 8.68221E-08 | aldehyde dehydrogenase 2 family (mitochondrial)                                         |
| ENSG00000182534 | 1.32 | 5.18  | 6.68565E-05 | 0.00032893  | matrix-remodelling associated 7                                                         |
| ENSG00000214413 | 1.32 | 4.36  | 1.02267E-05 | 6.19292E-05 | BBSome interacting protein 1                                                            |
| ENSG00000136448 | 1.32 | 7.84  | 5.06388E-09 | 6.50077E-08 | N-myristoyltransferase 1                                                                |
| ENSG00000189057 | 1.31 | 4.39  | 9.49188E-07 | 7.42021E-06 | family with sequence similarity 111, member B                                           |
| ENSG00000150991 | 1.31 | 9.80  | 4.64652E-07 | 3.8889E-06  | ubiquitin C                                                                             |
| ENSG00000119878 | 1.31 | 4.78  | 3.32205E-07 | 2.86902E-06 | cysteine-rich PDZ-binding protein                                                       |
| ENSG00000197256 | 1.31 | 5.09  | 5.54479E-08 | 5.70554E-07 | KN motif and ankyrin repeat domains 2                                                   |
| ENSG00000280828 | 1.31 | 4.26  | 1.06199E-05 | 6.39893E-05 | RP11-274B21.1                                                                           |
| ENSG00000262418 | 1.31 | 8.73  | 1.35063E-08 | 1.59362E-07 | protein tyrosine phosphatase, receptor type, C                                          |
| ENSG00000120709 | 1.31 | 6.19  | 3.9269E-09  | 5.17119E-08 | family with sequence similarity 53, member C                                            |
| ENSG00000106560 | 1.31 | 4.51  | 9.98483E-07 | 7.7508E-06  | GTPase, IMAP family member 2                                                            |
| ENSG00000177738 | 1.31 | 4.73  | 7.46189E-07 | 5.99208E-06 | CTD-2201E18.3                                                                           |
| ENSG00000155876 | 1.30 | 5.67  | 8.09836E-09 | 9.99049E-08 | Ras-related GTP binding A                                                               |
| ENSG00000119820 | 1.30 | 7.38  | 3.544E-10   | 5.69528E-09 | Yip1 domain family, member 4                                                            |
| ENSG00000136238 | 1.30 | 9.01  | 5.19893E-08 | 5.38725E-07 | ras-related C3 botulinum toxin substrate 1 (rho family, small GTP binding protein Rac1) |
| ENSG00000124201 | 1.30 | 5.62  | 2.10455E-07 | 1.90558E-06 | zinc finger, NFX1-type containing 1                                                     |
| ENSG00000124614 | 1.30 | 10.03 | 4.54715E-06 | 2.99399E-05 | ribosomal protein S10                                                                   |
| ENSG00000141526 | 1.30 | 8.84  | 6.79043E-07 | 5.50282E-06 | solute carrier family 16 (monocarboxylate transporter), member 3                        |
| ENSG00000198604 | 1.30 | 8.76  | 7.06723E-08 | 7.15018E-07 | bromodomain adjacent to zinc finger domain, 1A                                          |
| ENSG00000104814 | 1.30 | 6.15  | 1.10421E-07 | 1.06598E-06 | mitogen-activated protein kinase kinase kinase kinase 1                                 |
| ENSG00000110700 | 1.30 | 10.18 | 3.67255E-06 | 2.49103E-05 | ribosomal protein S13                                                                   |
| ENSG00000198682 | 1.30 | 4.62  | 7.90713E-07 | 6.31524E-06 | 3'-phosphoadenosine 5'-phosphosulfate synthase 2                                        |
| ENSG00000167850 | 1.29 | 4.53  | 3.22744E-06 | 2.2186E-05  | CD300c molecule                                                                         |
| ENSG00000198265 | 1.29 | 6.87  | 1.1495E-09  | 1.65853E-08 | helicase with zinc finger                                                               |
| ENSG00000113108 | 1.29 | 5.25  | 2.14878E-08 | 2.40091E-07 | amyloid beta (A4) precursor protein-binding, family B, member 3                         |
| ENSG00000186470 | 1.28 | 5.84  | 5.1613E-07  | 4.2766E-06  | butyrophilin, subfamily 3, member A2                                                    |
| ENSG00000109046 | 1.28 | 7.95  | 1.41196E-07 | 1.33018E-06 | WD repeat and SOCS box containing 1                                                     |
| ENSG00000185808 | 1.28 | 4.86  | 4.64149E-07 | 3.88714E-06 | phosphatidylinositol glycan anchor biosynthesis, class P                                |
| ENSG00000159055 | 1.28 | 5.58  | 8.43052E-08 | 8.35125E-07 | MIS18 kinetochore protein A                                                             |
| ENSG00000164054 | 1.28 | 8.20  | 1.42418E-08 | 1.66707E-07 | shisa family member 5                                                                   |
| ENSG00000168961 | 1.28 | 7.40  | 1.47406E-09 | 2.09376E-08 | lectin, galactoside-binding, soluble, 9                                                 |
| ENSG00000102265 | 1.28 | 7.27  | 9.03804E-09 | 1.10674E-07 | TIMP metalloproteinase inhibitor 1                                                      |
| ENSG00000198951 | 1.28 | 5.27  | 6.76551E-08 | 6.86061E-07 | N-acetylgalactosaminidase, alpha-                                                       |
| ENSG00000147439 | 1.27 | 4.91  | 2.55031E-06 | 1.79305E-05 | bridging integrator 3                                                                   |
| ENSG00000085224 | 1.27 | 6.98  | 1.4378E-07  | 1.35261E-06 | alpha thalassemia/mental retardation syndrome X-linked                                  |
| ENSG00000124067 | 1.27 | 4.34  | 4.19476E-06 | 2.79397E-05 | solute carrier family 12 (potassium/chloride transporter), member 4                     |
| ENSG00000129810 | 1.27 | 5.19  | 2.34508E-06 | 1.66334E-05 | shugoshin-like 1 (S. pombe)                                                             |
| ENSG00000145743 | 1.27 | 5.23  | 8.02404E-06 | 4.98881E-05 | F-box and leucine-rich repeat protein 17                                                |
| ENSG00000157349 | 1.27 | 4.29  | 2.94922E-05 | 0.000158686 | DEAD (Asp-Glu-Ala-Asp) box polypeptide 19B                                              |
| ENSG00000281794 | 1.26 | 6.44  | 1.76276E-08 | 2.00849E-07 | long intergenic non-protein coding RNA 969                                              |
| ENSG00000253230 | 1.26 | 5.11  | 9.27913E-07 | 7.28208E-06 | long intergenic non-protein coding RNA 599                                              |

|                  |      |       |             |             |                                                                                                     |
|------------------|------|-------|-------------|-------------|-----------------------------------------------------------------------------------------------------|
| ENSG00000100599  | 1.26 | 5.06  | 2.62895E-07 | 2.3249E-06  | Ras and Rab interactor 3                                                                            |
| ENSG00000105372  | 1.26 | 10.45 | 1.75031E-05 | 9.96721E-05 | ribosomal protein S19                                                                               |
| ENSG00000068137  | 1.26 | 4.60  | 5.07951E-05 | 0.00025794  | pleckstrin homology domain containing, family H (with MyTH4 domain) member 3                        |
| ENSG00000248092  | 1.26 | 4.94  | 4.00432E-06 | 2.68587E-05 | NNT antisense RNA 1                                                                                 |
| ENSG00000132963  | 1.26 | 8.00  | 2.75962E-09 | 3.73788E-08 | proteasome maturation protein                                                                       |
| ENSG00000130164  | 1.26 | 7.21  | 1.13492E-08 | 1.3621E-07  | low density lipoprotein receptor                                                                    |
| ENSG00000144034  | 1.25 | 5.95  | 2.02997E-08 | 2.28468E-07 | TP53RK binding protein                                                                              |
| ENSG00000102977  | 1.25 | 4.51  | 1.35502E-05 | 7.93058E-05 | adrenocortical dysplasia homolog (mouse)                                                            |
| ENSG00000128016  | 1.25 | 7.22  | 9.04722E-08 | 8.87604E-07 | ZFP36 ring finger protein                                                                           |
| ENSG00000117394  | 1.25 | 6.09  | 1.43468E-08 | 1.67788E-07 | solute carrier family 2 (facilitated glucose transporter), member 1                                 |
| ENSG00000163125  | 1.25 | 6.39  | 1.27153E-08 | 1.50564E-07 | regulation of nuclear pre-mRNA domain containing 2                                                  |
| ENSG00000229117  | 1.24 | 10.31 | 6.46238E-06 | 4.11225E-05 | ribosomal protein L41                                                                               |
| ENSG00000169499  | 1.24 | 5.67  | 2.62989E-08 | 2.88744E-07 | pleckstrin homology domain containing, family A (phosphoinositide binding specific) member 2        |
| ENSG00000117614  | 1.24 | 6.27  | 1.75806E-07 | 1.62522E-06 | SYF2 pre-mRNA-splicing factor                                                                       |
| ENSG00000082074  | 1.24 | 5.22  | 1.17055E-06 | 8.88388E-06 | FYN binding protein                                                                                 |
| ENSG00000090013  | 1.24 | 5.55  | 4.14718E-08 | 4.36902E-07 | biliverdin reductase B                                                                              |
| ENSG00000135974  | 1.24 | 5.74  | 4.35949E-08 | 4.58178E-07 | chromosome 2 open reading frame 49                                                                  |
| ENSG00000173207  | 1.24 | 6.64  | 8.70867E-09 | 1.0674E-07  | CDC28 protein kinase regulatory subunit 1B                                                          |
| ENSG00000132950  | 1.24 | 4.24  | 4.6889E-05  | 0.000240497 | zinc finger, MYM-type 5                                                                             |
| ENSG00000205423  | 1.23 | 4.29  | 5.89987E-05 | 0.000294306 | CTD nuclear envelope phosphatase 1 regulatory subunit 1                                             |
| ENSG00000143353  | 1.23 | 4.98  | 5.04374E-06 | 3.28189E-05 | lysophospholipase-like 1                                                                            |
| ENSG00000172725  | 1.23 | 7.10  | 0.00016445  | 0.000726573 | coronin, actin binding protein, 1B                                                                  |
| ENSG00000254999  | 1.23 | 7.82  | 7.09567E-08 | 7.17349E-07 | BRICK1, SCAR/WAVE actin-nucleating complex subunit                                                  |
| ENSG00000175727  | 1.23 | 7.26  | 1.02721E-08 | 1.24636E-07 | MLX interacting protein                                                                             |
| ENSG00000221983  | 1.23 | 10.29 | 1.74668E-05 | 9.95082E-05 | ubiquitin A-52 residue ribosomal protein fusion product 1                                           |
| ENSG00000143507  | 1.22 | 5.00  | 1.81943E-06 | 1.31685E-05 | dual specificity phosphatase 10                                                                     |
| ENSG00000239382  | 1.22 | 4.53  | 3.86714E-06 | 2.6057E-05  | alkB homolog 6                                                                                      |
| ENSG00000118985  | 1.22 | 4.90  | 7.05818E-07 | 5.692E-06   | elongation factor, RNA polymerase II, 2                                                             |
| ENSG00000178802  | 1.22 | 6.21  | 2.22789E-08 | 2.4768E-07  | mannose phosphate isomerase                                                                         |
| ENSG00000135452  | 1.22 | 4.72  | 2.3776E-06  | 1.68232E-05 | tetraspanin 31                                                                                      |
| ENSG00000227669  | 1.22 | 6.48  | 5.70432E-08 | 5.85608E-07 | major histocompatibility complex, class I, H (pseudogene)                                           |
| ENSG00000106617  | 1.22 | 4.59  | 4.64346E-06 | 3.04417E-05 | protein kinase, AMP-activated, gamma 2 non-catalytic subunit                                        |
| ENSG00000117697  | 1.22 | 6.16  | 2.36814E-08 | 2.62175E-07 | NSL1, MIS12 kinetochore complex component                                                           |
| ENSG00000168255  | 1.21 | 4.65  | 1.0825E-05  | 6.51362E-05 | polymerase (RNA) II (DNA directed) polypeptide J3                                                   |
| ENSG00000166128  | 1.21 | 5.95  | 7.0505E-08  | 7.1387E-07  | RAB8B, member RAS oncogene family                                                                   |
| ENSG00000129696  | 1.21 | 4.83  | 0.000343877 | 0.001380709 | TELO2 interacting protein 2                                                                         |
| ENSG00000141971  | 1.21 | 5.93  | 9.1813E-08  | 9.00093E-07 | multivesicular body subunit 12A                                                                     |
| ENSG00000145247  | 1.21 | 4.50  | 5.79461E-06 | 3.72844E-05 | OClA domain containing 2                                                                            |
| ENSG00000166341  | 1.21 | 5.45  | 1.12522E-07 | 1.0845E-06  | dachsous cadherin-related 1                                                                         |
| ENSG00000186010  | 1.20 | 6.48  | 3.73201E-08 | 3.96945E-07 | NADH dehydrogenase (ubiquinone) 1 alpha subcomplex, 13                                              |
| ENSG00000125971  | 1.20 | 6.77  | 9.31071E-09 | 1.13699E-07 | dynein, light chain, roadblock-type 1                                                               |
| ENSG00000160223  | 1.20 | 5.66  | 4.29593E-06 | 2.85121E-05 | inducible T-cell co-stimulator ligand                                                               |
| ENSG00000165264  | 1.20 | 5.82  | 1.58603E-07 | 1.48156E-06 | NADH dehydrogenase (ubiquinone) 1 beta subcomplex, 6, 17kDa                                         |
| ENSG00000163131  | 1.20 | 7.75  | 1.68093E-08 | 1.92185E-07 | cathepsin S                                                                                         |
| ENSG00000158869  | 1.20 | 7.44  | 1.13179E-08 | 1.35958E-07 | Fc fragment of IgE, high affinity I, receptor for, gamma polypeptide                                |
| ENSG00000114439  | 1.20 | 4.33  | 0.000182099 | 0.000795386 | bobby sox homolog (Drosophila)                                                                      |
| ENSG00000114062  | 1.20 | 6.74  | 6.84118E-07 | 5.53719E-06 | ubiquitin protein ligase E3A                                                                        |
| ENSG00000162704  | 1.19 | 9.00  | 6.99194E-07 | 5.64887E-06 | actin related protein 2/3 complex, subunit 5, 16kDa                                                 |
| ENSG00000102316  | 1.19 | 6.17  | 4.62309E-08 | 4.83204E-07 | melanoma antigen family D2                                                                          |
| ENSG00000005238  | 1.19 | 4.33  | 1.23359E-05 | 7.31337E-05 | family with sequence similarity 214, member B                                                       |
| ENSG00000149257  | 1.19 | 6.79  | 1.80091E-08 | 2.04319E-07 | serpin peptidase inhibitor, clade H (heat shock protein 47), member 1, (collagen binding protein 1) |
| ENSG000000084676 | 1.18 | 5.02  | 2.54149E-05 | 0.000138918 | nuclear receptor coactivator 1                                                                      |
| ENSG00000124766  | 1.18 | 6.67  | 2.67319E-08 | 2.93014E-07 | SRY (sex determining region Y)-box 4                                                                |
| ENSG00000114391  | 1.18 | 9.58  | 2.70447E-06 | 1.89442E-05 | ribosomal protein L24                                                                               |
| ENSG00000159882  | 1.18 | 4.46  | 5.16751E-05 | 0.000261808 | zinc finger protein 230                                                                             |
| ENSG00000141428  | 1.18 | 4.34  | 1.52418E-05 | 8.78888E-05 | chromosome 18 open reading frame 21                                                                 |
| ENSG00000142687  | 1.18 | 6.84  | 4.0911E-08  | 4.31336E-07 | KIAA0319-like                                                                                       |
| ENSG00000127540  | 1.18 | 6.30  | 1.60626E-07 | 1.49835E-06 | ubiquinol-cytochrome c reductase, complex III subunit XI                                            |
| ENSG00000160753  | 1.18 | 5.54  | 6.55096E-07 | 5.32501E-06 | RUN and SH3 domain containing 1                                                                     |
| ENSG00000114796  | 1.17 | 4.69  | 7.20889E-06 | 4.53726E-05 | kelch-like family member 24                                                                         |
| ENSG00000196154  | 1.17 | 8.19  | 1.14692E-06 | 8.71951E-06 | S100 calcium binding protein A4                                                                     |
| ENSG00000177576  | 1.17 | 4.70  | 3.15722E-05 | 0.00016858  | chromosome 18 open reading frame 32                                                                 |
| ENSG00000164167  | 1.17 | 5.65  | 2.02229E-06 | 1.45024E-05 | LSM6 homolog, U6 small nuclear RNA and mRNA degradation associated                                  |
| ENSG00000278461  | 1.17 | 5.01  | 1.0335E-05  | 6.24997E-05 | mitochondrial ribosomal protein S36                                                                 |
| ENSG00000096996  | 1.17 | 4.38  | 1.18648E-05 | 7.08156E-05 | interleukin 12 receptor, beta 1                                                                     |
| ENSG00000137806  | 1.16 | 4.95  | 2.74348E-06 | 1.9187E-05  | NADH dehydrogenase (ubiquinone) complex I, assembly factor 1                                        |
| ENSG00000175305  | 1.16 | 4.39  | 0.000164097 | 0.000725505 | cyclin E2                                                                                           |
| ENSG00000185088  | 1.16 | 6.83  | 2.20846E-07 | 1.98881E-06 | ribosomal protein S27-like                                                                          |
| ENSG00000104812  | 1.16 | 6.96  | 1.53691E-07 | 1.43871E-06 | glycogen synthase 1 (muscle)                                                                        |
| ENSG00000160049  | 1.16 | 7.06  | 6.16438E-08 | 6.29915E-07 | DNA fragmentation factor, 45kDa, alpha polypeptide                                                  |
| ENSG00000197324  | 1.16 | 6.91  | 3.1561E-05  | 0.00016858  | low density lipoprotein receptor-related protein 10                                                 |

|                  |      |       |             |             |                                                                                    |
|------------------|------|-------|-------------|-------------|------------------------------------------------------------------------------------|
| ENSG00000196628  | 1.16 | 7.78  | 2.38858E-07 | 2.13365E-06 | transcription factor 4                                                             |
| ENSG00000269858  | 1.16 | 6.00  | 0.00020036  | 0.000861821 | egl-9 family hypoxia-inducible factor 2                                            |
| ENSG00000134248  | 1.16 | 6.19  | 2.26017E-07 | 2.03125E-06 | late endosomal/lysosomal adaptor, MAPK and MTOR activator 5                        |
| ENSG00000223745  | 1.16 | 4.94  | 1.48769E-05 | 8.60839E-05 | RP4-717123.3                                                                       |
| ENSG00000158417  | 1.16 | 8.72  | 9.60568E-07 | 7.49593E-06 | eukaryotic translation initiation factor 5B                                        |
| ENSG00000185950  | 1.15 | 8.44  | 0.000162497 | 0.000719475 | insulin receptor substrate 2                                                       |
| ENSG00000007047  | 1.15 | 5.20  | 8.10374E-07 | 6.44512E-06 | MAP/microtubule affinity-regulating kinase 4                                       |
| ENSG00000105220  | 1.15 | 9.48  | 7.08514E-06 | 4.46572E-05 | glucose-6-phosphate isomerase                                                      |
| ENSG00000153113  | 1.15 | 5.84  | 2.79195E-06 | 1.94849E-05 | calpastatin                                                                        |
| ENSG00000135926  | 1.15 | 5.06  | 4.26335E-06 | 2.83136E-05 | transmembrane BAX inhibitor motif containing 1                                     |
| ENSG00000145050  | 1.15 | 7.72  | 3.34554E-07 | 2.88743E-06 | mesencephalic astrocyte-derived neurotrophic factor                                |
| ENSG00000183648  | 1.14 | 6.32  | 5.34046E-07 | 4.40853E-06 | NADH dehydrogenase (ubiquinone) 1 beta subcomplex, 1, 7kDa                         |
| ENSG00000113732  | 1.14 | 7.85  | 7.3031E-06  | 4.58568E-05 | ATPase, H+ transporting, lysosomal 9kDa, V0 subunit e1                             |
| ENSG00000124006  | 1.14 | 4.82  | 0.001024095 | 0.00358204  | obscurin-like 1                                                                    |
| ENSG00000105856  | 1.14 | 4.88  | 4.78908E-06 | 3.12846E-05 | HMG-box transcription factor 1                                                     |
| ENSG00000196507  | 1.14 | 5.25  | 7.44863E-07 | 5.99165E-06 | transcription elongation factor A (SII)-like 3                                     |
| ENSG00000187118  | 1.14 | 5.83  | 4.87541E-07 | 4.0549E-06  | C-x(9)-C motif containing 1                                                        |
| ENSG00000166928  | 1.14 | 4.39  | 0.000113191 | 0.000524068 | membrane-spanning 4-domains, subfamily A, member 14                                |
| ENSG00000167625  | 1.14 | 4.50  | 0.000128862 | 0.000586397 | zinc finger protein 526                                                            |
| ENSG00000102144  | 1.13 | 10.06 | 5.4357E-05  | 0.000273412 | phosphoglycerate kinase 1                                                          |
| ENSG00000174282  | 1.13 | 4.84  | 1.02185E-05 | 6.19112E-05 | zinc finger and BTB domain containing 4                                            |
| ENSG00000156535  | 1.13 | 5.88  | 2.04029E-05 | 0.000114418 | CD109 molecule                                                                     |
| ENSG00000229252  | 1.13 | 9.09  | 2.91342E-06 | 2.01947E-05 | major histocompatibility complex, class I, E                                       |
| ENSG00000134954  | 1.13 | 6.77  | 8.99648E-08 | 8.83932E-07 | v-ets avian erythroblastosis virus E26 oncogene homolog 1                          |
| ENSG00000275199  | 1.13 | 4.56  | 2.97896E-05 | 0.000160092 | v-akt murine thymoma viral oncogene homolog 3                                      |
| ENSG00000076650  | 1.13 | 4.86  | 6.22678E-06 | 3.97568E-05 | G patch domain containing 1                                                        |
| ENSG00000117616  | 1.13 | 7.82  | 1.52057E-07 | 1.42542E-06 | arginine/serine-rich protein 1                                                     |
| ENSG00000114544  | 1.13 | 5.29  | 1.65479E-05 | 9.48434E-05 | solute carrier family 41, member 3                                                 |
| ENSG00000075711  | 1.13 | 6.37  | 2.66597E-07 | 2.35137E-06 | discs, large homolog 1 (Drosophila)                                                |
| ENSG00000005448  | 1.13 | 4.64  | 0.001038847 | 0.003624088 | WD repeat domain 54                                                                |
| ENSG00000088854  | 1.13 | 5.19  | 5.80185E-06 | 3.73129E-05 | chromosome 20 open reading frame 194                                               |
| ENSG00000265681  | 1.13 | 9.74  | 1.73511E-05 | 9.9019E-05  | ribosomal protein L17                                                              |
| ENSG00000168802  | 1.12 | 6.69  | 7.28295E-06 | 4.57736E-05 | chromosome transmission fidelity factor 8                                          |
| ENSG00000139684  | 1.12 | 6.61  | 1.19991E-07 | 1.15001E-06 | esterase D                                                                         |
| ENSG00000008324  | 1.12 | 4.99  | 6.2086E-06  | 3.96598E-05 | synovial sarcoma translocation gene on chromosome 18-like 2                        |
| ENSG00000124098  | 1.12 | 4.87  | 1.25285E-05 | 7.41762E-05 | family with sequence similarity 210, member B                                      |
| ENSG00000170315  | 1.12 | 10.24 | 0.000118081 | 0.000542917 | ubiquitin B                                                                        |
| ENSG000000064393 | 1.12 | 7.04  | 7.41904E-05 | 0.000360206 | homeodomain interacting protein kinase 2                                           |
| ENSG00000177200  | 1.12 | 5.40  | 2.38576E-06 | 1.68675E-05 | chromodomain helicase DNA binding protein 9                                        |
| ENSG00000105640  | 1.12 | 9.91  | 3.68773E-05 | 0.000192922 | ribosomal protein L18a                                                             |
| ENSG00000006534  | 1.12 | 6.77  | 4.79049E-07 | 3.9993E-06  | aldehyde dehydrogenase 3 family, member B1                                         |
| ENSG00000276879  | 1.12 | 4.22  | 9.64528E-05 | 0.000452888 | interferon, alpha-inducible protein 27-like 2                                      |
| ENSG00000125870  | 1.11 | 7.59  | 8.35172E-08 | 8.29796E-07 | small nuclear ribonucleoprotein polypeptide B                                      |
| ENSG00000164074  | 1.11 | 5.44  | 1.62464E-06 | 1.19278E-05 | chromosome 4 open reading frame 29                                                 |
| ENSG00000163110  | 1.11 | 5.56  | 4.3795E-06  | 2.89798E-05 | PDZ and LIM domain 5                                                               |
| ENSG00000164088  | 1.11 | 5.01  | 5.84135E-06 | 3.75487E-05 | protein phosphatase, Mg2+/Mn2+ dependent, 1M                                       |
| ENSG00000125354  | 1.11 | 6.88  | 4.2311E-07  | 3.56594E-06 | septin 6                                                                           |
| ENSG00000130311  | 1.10 | 6.37  | 3.7365E-07  | 3.18853E-06 | DET1 and DDB1 associated 1                                                         |
| ENSG00000206503  | 1.10 | 11.22 | 0.000397168 | 0.001566694 | major histocompatibility complex, class I, A                                       |
| ENSG00000141298  | 1.10 | 5.07  | 0.000811334 | 0.002933711 | slingshot protein phosphatase 2                                                    |
| ENSG00000116205  | 1.10 | 4.60  | 2.83249E-05 | 0.000152963 | transcription elongation factor A (SII) N-terminal and central domain containing 2 |
| ENSG00000237765  | 1.10 | 4.57  | 0.000581606 | 0.002190762 | family with sequence similarity 200, member B                                      |
| ENSG00000125347  | 1.09 | 5.35  | 0.000762255 | 0.002780484 | interferon regulatory factor 1                                                     |
| ENSG00000107738  | 1.09 | 7.11  | 1.39054E-07 | 1.31187E-06 | chromosome 10 open reading frame 54                                                |
| ENSG00000038002  | 1.09 | 6.05  | 1.04154E-05 | 6.29285E-05 | aspartylglucosaminidase                                                            |
| ENSG00000153250  | 1.09 | 6.73  | 3.31704E-07 | 2.86657E-06 | RNA binding motif, single stranded interacting protein 1                           |
| ENSG00000161203  | 1.09 | 7.99  | 0.000215419 | 0.000919572 | adaptor-related protein complex 2, mu 1 subunit                                    |
| ENSG00000132694  | 1.09 | 5.95  | 1.01844E-06 | 7.88265E-06 | Rho guanine nucleotide exchange factor (GEF) 11                                    |
| ENSG00000184752  | 1.09 | 5.84  | 2.26751E-06 | 1.61302E-05 | NADH dehydrogenase (ubiquinone) 1 alpha subcomplex, 12                             |
| ENSG00000133246  | 1.09 | 5.89  | 9.27711E-06 | 5.67486E-05 | PML-RARA regulated adaptor molecule 1                                              |
| ENSG00000125037  | 1.09 | 6.40  | 6.85364E-06 | 4.32597E-05 | ER membrane protein complex subunit 3                                              |
| ENSG00000241343  | 1.09 | 7.22  | 8.81585E-07 | 6.9449E-06  | ribosomal protein L36a                                                             |
| ENSG00000163960  | 1.09 | 6.15  | 7.73561E-07 | 6.20063E-06 | UBX domain protein 7                                                               |
| ENSG00000108599  | 1.09 | 5.10  | 7.45023E-06 | 4.66483E-05 | A kinase (PRKA) anchor protein 10                                                  |
| ENSG00000150540  | 1.09 | 6.52  | 3.55152E-06 | 2.42255E-05 | histamine N-methyltransferase                                                      |
| ENSG00000105011  | 1.08 | 6.88  | 2.01036E-07 | 1.82903E-06 | anti-silencing function 1B histone chaperone                                       |
| ENSG00000082996  | 1.08 | 5.97  | 1.58634E-06 | 1.16724E-05 | ring finger protein 13                                                             |
| ENSG00000110492  | 1.08 | 5.40  | 8.97973E-06 | 5.51582E-05 | midkine (neurite growth-promoting factor 2)                                        |
| ENSG00000105849  | 1.08 | 7.27  | 6.17609E-06 | 3.94711E-05 | TWIST neighbor                                                                     |
| ENSG00000160058  | 1.08 | 5.76  | 7.48994E-07 | 6.00734E-06 | BSD domain containing 1                                                            |
| ENSG00000105223  | 1.08 | 8.09  | 3.32092E-06 | 2.27696E-05 | phospholipase D family, member 3                                                   |
| ENSG00000129636  | 1.08 | 5.53  | 9.20264E-06 | 5.63584E-05 | integrin alpha FG-GAP repeat containing 1                                          |

|                 |      |       |             |             |                                                                                         |
|-----------------|------|-------|-------------|-------------|-----------------------------------------------------------------------------------------|
| ENSG00000034510 | 1.08 | 8.62  | 2.51156E-06 | 1.76861E-05 | thymosin beta 10                                                                        |
| ENSG00000143119 | 1.08 | 8.28  | 9.93592E-07 | 7.72187E-06 | CD53 molecule                                                                           |
| ENSG00000132581 | 1.07 | 5.22  | 1.04961E-05 | 6.33299E-05 | stromal cell-derived factor 2                                                           |
| ENSG00000105404 | 1.07 | 5.11  | 5.95899E-06 | 3.82082E-05 | Rab acceptor 1 (prenylated)                                                             |
| ENSG00000205220 | 1.07 | 6.60  | 1.4488E-06  | 1.07679E-05 | proteasome (prosome, macropain) subunit, beta type, 10                                  |
| ENSG00000262349 | 1.07 | 5.97  | 1.38447E-06 | 1.03302E-05 | RP11-620J15.3                                                                           |
| ENSG00000143013 | 1.07 | 7.78  | 2.15594E-05 | 0.000120042 | LIM domain only 4                                                                       |
| ENSG00000100644 | 1.07 | 6.57  | 1.09486E-06 | 8.38611E-06 | hypoxia inducible factor 1, alpha subunit (basic helix-loop-helix transcription factor) |
| ENSG00000173486 | 1.07 | 6.37  | 8.79346E-07 | 6.93549E-06 | FK506 binding protein 2, 13kDa                                                          |
| ENSG00000169926 | 1.07 | 6.98  | 8.49178E-07 | 6.71784E-06 | Kruppel-like factor 13                                                                  |
| ENSG00000010404 | 1.07 | 4.60  | 3.69335E-05 | 0.000192943 | iduronate 2-sulfatase                                                                   |
| ENSG00000153132 | 1.06 | 5.17  | 0.000130251 | 0.000591905 | calmegin                                                                                |
| ENSG00000282230 | 1.06 | 5.96  | 2.82724E-06 | 1.96898E-05 | ADAM metallopeptidase domain 9                                                          |
| ENSG00000079739 | 1.06 | 6.48  | 0.000171742 | 0.000755371 | phosphoglucomutase 1                                                                    |
| ENSG00000143198 | 1.06 | 7.21  | 2.49439E-07 | 2.21772E-06 | microsomal glutathione S-transferase 3                                                  |
| ENSG00000143458 | 1.06 | 5.52  | 3.537E-06   | 2.41389E-05 | GA binding protein transcription factor, beta subunit 2                                 |
| ENSG00000077152 | 1.06 | 6.00  | 2.28225E-06 | 1.62263E-05 | ubiquitin-conjugating enzyme E2T                                                        |
| ENSG00000173221 | 1.06 | 4.79  | 0.000359586 | 0.001432518 | glutaredoxin (thioltransferase)                                                         |
| ENSG00000153048 | 1.06 | 5.92  | 1.42349E-05 | 8.26935E-05 | calcium regulated heat stable protein 1, 24kDa                                          |
| ENSG00000101363 | 1.06 | 4.64  | 3.61028E-05 | 0.000189269 | mannosidase, beta A, lysosomal-like                                                     |
| ENSG00000120727 | 1.06 | 7.20  | 6.30736E-07 | 5.16177E-06 | poly(A) binding protein interacting protein 2                                           |
| ENSG00000103335 | 1.05 | 7.98  | 2.82494E-06 | 1.96841E-05 | piezo-type mechanosensitive ion channel component 1                                     |
| ENSG00000112773 | 1.05 | 10.06 | 8.94377E-05 | 0.000423243 | family with sequence similarity 46, member A                                            |
| ENSG00000121067 | 1.05 | 6.81  | 3.00015E-06 | 2.0734E-05  | speckle-type POZ protein                                                                |
| ENSG00000142002 | 1.05 | 6.83  | 1.81304E-06 | 1.31295E-05 | dipeptidyl-peptidase 9                                                                  |
| ENSG00000178567 | 1.05 | 6.07  | 8.82338E-06 | 5.43488E-05 | EPM2A (laforin) interacting protein 1                                                   |
| ENSG00000103671 | 1.05 | 5.26  | 6.5052E-06  | 4.12961E-05 | thyroid hormone receptor interactor 4                                                   |
| ENSG00000247556 | 1.05 | 8.35  | 1.64333E-06 | 1.2045E-05  | OIP5 antisense RNA 1                                                                    |
| ENSG00000256235 | 1.05 | 5.90  | 5.05676E-06 | 3.28714E-05 | small integral membrane protein 3                                                       |
| ENSG00000119844 | 1.05 | 6.59  | 4.52704E-06 | 2.98371E-05 | aftiphilin                                                                              |
| ENSG00000171320 | 1.04 | 4.29  | 0.000463658 | 0.001792252 | establishment of sister chromatid cohesion N-acetyltransferase 2                        |
| ENSG00000119471 | 1.04 | 5.64  | 5.59254E-05 | 0.000280876 | hydroxysteroid dehydrogenase like 2                                                     |
| ENSG00000102910 | 1.04 | 5.87  | 2.59117E-06 | 1.81985E-05 | ion peptidase 2, peroxisomal                                                            |
| ENSG00000106261 | 1.04 | 6.83  | 1.20963E-06 | 9.14387E-06 | zinc finger with KRAB and SCAN domains 1                                                |
| ENSG00000138085 | 1.04 | 6.88  | 1.41682E-06 | 1.05478E-05 | all-trans retinoic acid-induced differentiation factor                                  |
| ENSG00000102908 | 1.04 | 5.66  | 0.000117999 | 0.000542729 | nuclear factor of activated T-cells 5, tonicity-responsive                              |
| ENSG00000161955 | 1.04 | 5.06  | 1.95196E-05 | 0.000109929 | tumor necrosis factor (ligand) superfamily, member 13                                   |
| ENSG00000189343 | 1.04 | 4.93  | 0.00026884  | 0.001115531 | ribosomal protein S2 pseudogene 46                                                      |
| ENSG00000148908 | 1.04 | 4.43  | 0.000154398 | 0.000688342 | regulator of G-protein signaling 10                                                     |
| ENSG00000135090 | 1.04 | 8.03  | 1.20847E-06 | 9.14031E-06 | TAO kinase 3                                                                            |
| ENSG00000152253 | 1.04 | 5.11  | 9.35682E-05 | 0.000440747 | SPC25, NDC80 kinetochore complex component                                              |
| ENSG00000165118 | 1.04 | 5.38  | 6.10458E-06 | 3.90329E-05 | chromosome 9 open reading frame 64                                                      |
| ENSG00000167193 | 1.03 | 5.12  | 1.71444E-05 | 9.80083E-05 | v-crk avian sarcoma virus CT10 oncogene homolog                                         |
| ENSG00000172830 | 1.03 | 6.09  | 2.05762E-06 | 1.47478E-05 | slingshot protein phosphatase 3                                                         |
| ENSG00000166927 | 1.03 | 5.48  | 3.30678E-05 | 0.000175507 | membrane-spanning 4-domains, subfamily A, member 7                                      |
| ENSG00000123975 | 1.03 | 7.30  | 8.97416E-07 | 7.06123E-06 | CDC28 protein kinase regulatory subunit 2                                               |
| ENSG00000107819 | 1.03 | 6.67  | 1.14526E-06 | 8.71183E-06 | sideroflexin 3                                                                          |
| ENSG00000143369 | 1.03 | 5.11  | 1.36546E-05 | 7.98115E-05 | extracellular matrix protein 1                                                          |
| ENSG00000038219 | 1.02 | 6.26  | 1.84549E-05 | 0.000104644 | bioorientation of chromosomes in cell division 1-like 1                                 |
| ENSG00000127507 | 1.02 | 5.54  | 2.0606E-05  | 0.000115362 | adhesion G protein-coupled receptor E2                                                  |
| ENSG00000113971 | 1.02 | 5.66  | 1.29057E-05 | 7.60701E-05 | nephronophthisis 3 (adolescent)                                                         |
| ENSG00000182179 | 1.02 | 6.91  | 5.00949E-06 | 3.26281E-05 | ubiquitin-like modifier activating enzyme 7                                             |
| ENSG00000124357 | 1.02 | 5.91  | 9.14909E-06 | 5.61206E-05 | N-acetylglucosamine kinase                                                              |
| ENSG00000114423 | 1.02 | 4.59  | 8.97356E-05 | 0.000424048 | Cbl proto-oncogene B, E3 ubiquitin protein ligase                                       |
| ENSG00000135441 | 1.02 | 5.87  | 4.57289E-05 | 0.000235365 | biogenesis of lysosomal organelles complex-1, subunit 1                                 |
| ENSG00000129292 | 1.02 | 6.53  | 5.65805E-06 | 3.65119E-05 | PHD finger protein 20-like 1                                                            |
| ENSG00000024862 | 1.02 | 5.51  | 0.000712073 | 0.002619024 | coiled-coil domain containing 28A                                                       |
| ENSG00000102893 | 1.02 | 5.80  | 4.02337E-06 | 2.6939E-05  | phosphorylase kinase, beta                                                              |
| ENSG00000099860 | 1.02 | 4.66  | 0.000132186 | 0.000599056 | growth arrest and DNA-damage-inducible, beta                                            |
| ENSG00000124226 | 1.02 | 7.05  | 1.24494E-06 | 9.3894E-06  | ring finger protein 114                                                                 |
| ENSG00000133639 | 1.02 | 6.63  | 4.11535E-06 | 2.74784E-05 | B-cell translocation gene 1, anti-proliferative                                         |
| ENSG00000162222 | 1.02 | 5.13  | 6.83936E-05 | 0.000335622 | tetratricopeptide repeat domain 9C                                                      |
| ENSG00000131408 | 1.02 | 6.61  | 6.41987E-05 | 0.000317383 | nuclear receptor subfamily 1, group H, member 2                                         |
| ENSG00000117407 | 1.01 | 5.35  | 1.1973E-05  | 7.12773E-05 | artemin                                                                                 |
| ENSG00000282031 | 1.01 | 6.48  | 0.00018946  | 0.00082186  | transmembrane BAX inhibitor motif containing 4                                          |
| ENSG00000170145 | 1.01 | 5.03  | 0.001220335 | 0.004170629 | salt-inducible kinase 2                                                                 |
| ENSG00000179152 | 1.01 | 5.78  | 7.95948E-06 | 4.95331E-05 | T cell activation inhibitor, mitochondrial                                              |
| ENSG00000178878 | 1.01 | 5.98  | 9.68612E-06 | 5.906E-05   | apolipoprotein L domain containing 1                                                    |
| ENSG00000122257 | 1.01 | 7.35  | 2.69443E-06 | 1.88838E-05 | retinoblastoma binding protein 6                                                        |
| ENSG00000107798 | 1.01 | 7.03  | 1.94551E-05 | 0.000109659 | lipase A, lysosomal acid, cholesterol esterase                                          |
| ENSG00000106780 | 1.01 | 5.62  | 2.58505E-05 | 0.000141093 | multiple EGF-like-domains 9                                                             |
| ENSG00000104976 | 1.01 | 4.58  | 0.000404706 | 0.001590309 | small nuclear RNA activating complex, polypeptide 2, 45kDa                              |

|                  |       |       |             |             |                                                                               |
|------------------|-------|-------|-------------|-------------|-------------------------------------------------------------------------------|
| ENSG00000175550  | 1.01  | 6.17  | 2.15453E-05 | 0.000120042 | DR1-associated protein 1 (negative cofactor 2 alpha)                          |
| ENSG00000162244  | 1.01  | 10.29 | 0.000260847 | 0.001087124 | ribosomal protein L29                                                         |
| ENSG00000161202  | 1.00  | 4.28  | 0.000221531 | 0.000942804 | dishevelled segment polarity protein 3                                        |
| ENSG00000125629  | 1.00  | 4.85  | 0.000197747 | 0.000852239 | insulin induced gene 2                                                        |
| ENSG00000008513  | 1.00  | 7.18  | 2.84691E-05 | 0.000153617 | ST3 beta-galactoside alpha-2,3-sialyltransferase 1                            |
| ENSG00000206190  | 1.00  | 4.23  | 0.002526845 | 0.00782579  | ATPase, class V, type 10A                                                     |
| ENSG000000035141 | -1.00 | 6.01  | 1.33505E-05 | 7.82402E-05 | family with sequence similarity 136, member A                                 |
| ENSG00000140403  | -1.00 | 5.65  | 5.27981E-05 | 0.000266734 | DnaJ (Hsp40) homolog, subfamily A, member 4                                   |
| ENSG00000107104  | -1.00 | 4.94  | 8.76854E-05 | 0.000416137 | KN motif and ankyrin repeat domains 1                                         |
| ENSG00000114867  | -1.00 | 8.27  | 2.75931E-05 | 0.000149682 | eukaryotic translation initiation factor 4 gamma, 1                           |
| ENSG00000132436  | -1.00 | 4.87  | 6.21906E-05 | 0.000308605 | fidgetin-like 1                                                               |
| ENSG00000108883  | -1.00 | 7.33  | 3.28058E-06 | 2.25161E-05 | elongation factor Tu GTP binding domain containing 2                          |
| ENSG00000102900  | -1.00 | 5.16  | 8.77487E-05 | 0.000416289 | nucleoporin 93kDa                                                             |
| ENSG00000168936  | -1.00 | 5.23  | 1.40737E-05 | 8.19721E-05 | transmembrane protein 129, E3 ubiquitin protein ligase                        |
| ENSG00000163389  | -1.00 | 5.28  | 3.20966E-05 | 0.000171047 | protein O-glucosyltransferase 1                                               |
| ENSG00000213639  | -1.01 | 6.82  | 1.56499E-06 | 1.15409E-05 | protein phosphatase 1, catalytic subunit, beta isozyme                        |
| ENSG00000057663  | -1.01 | 5.75  | 5.56793E-06 | 3.59653E-05 | autophagy related 5                                                           |
| ENSG00000109736  | -1.01 | 8.12  | 1.262E-05   | 7.45714E-05 | major facilitator superfamily domain containing 10                            |
| ENSG00000025156  | -1.01 | 4.56  | 9.15211E-05 | 0.00043141  | heat shock transcription factor 2                                             |
| ENSG00000138018  | -1.01 | 5.58  | 8.63884E-06 | 5.33358E-05 | ethanolaminephosphotransferase 1                                              |
| ENSG00000166557  | -1.01 | 6.69  | 1.999E-05   | 0.000112293 | transmembrane emp24 protein transport domain containing 3                     |
| ENSG00000185344  | -1.01 | 5.17  | 0.000114694 | 0.000529362 | ATPase, H+ transporting, lysosomal V0 subunit a2                              |
| ENSG00000160803  | -1.01 | 6.01  | 8.17204E-06 | 5.06853E-05 | ubiquilin 4                                                                   |
| ENSG00000087365  | -1.01 | 7.77  | 1.88147E-06 | 1.35732E-05 | splicing factor 3b, subunit 2, 145kDa                                         |
| ENSG00000188971  | -1.01 | 5.12  | 3.13472E-05 | 0.000167648 | RP11-427H3.3                                                                  |
| ENSG00000258984  | -1.01 | 4.56  | 0.000109747 | 0.000509363 | UBE2F-SCLY readthrough (NMD candidate)                                        |
| ENSG00000175467  | -1.01 | 6.34  | 4.53069E-06 | 2.98464E-05 | squamous cell carcinoma antigen recognized by T cells 1                       |
| ENSG00000171497  | -1.01 | 5.58  | 1.28508E-05 | 7.5814E-05  | peptidylprolyl isomerase D                                                    |
| ENSG00000163444  | -1.01 | 6.46  | 3.17376E-06 | 2.18282E-05 | transmembrane protein 183A                                                    |
| ENSG00000112249  | -1.01 | 5.36  | 7.51465E-06 | 4.70073E-05 | activating signal cointegrator 1 complex subunit 3                            |
| ENSG00000170854  | -1.01 | 4.34  | 0.000217972 | 0.000928848 | MYC induced nuclear antigen                                                   |
| ENSG00000172053  | -1.01 | 7.62  | 4.55771E-06 | 2.9992E-05  | glutaminyl-tRNA synthetase                                                    |
| ENSG00000204946  | -1.01 | 4.38  | 0.000208519 | 0.000893153 | zinc finger family member 783                                                 |
| ENSG00000169045  | -1.02 | 9.42  | 4.3042E-05  | 0.00022397  | heterogeneous nuclear ribonucleoprotein H1 (H)                                |
| ENSG00000198799  | -1.02 | 4.78  | 0.000115669 | 0.000533306 | leucine-rich repeats and immunoglobulin-like domains 2                        |
| ENSG00000105676  | -1.02 | 5.80  | 1.10672E-05 | 6.64734E-05 | armadillo repeat containing 6                                                 |
| ENSG00000043514  | -1.02 | 4.61  | 0.000271705 | 0.001126009 | tRNA isopentenyltransferase 1                                                 |
| ENSG00000169689  | -1.02 | 5.82  | 3.01623E-05 | 0.000161898 | stimulated by retinoic acid 13                                                |
| ENSG00000230257  | -1.02 | 4.73  | 0.000400998 | 0.001579013 | nuclear factor, erythroid 4                                                   |
| ENSG00000134186  | -1.02 | 6.74  | 1.13916E-06 | 8.6704E-06  | pre-mRNA processing factor 38B                                                |
| ENSG00000164087  | -1.02 | 4.49  | 0.000109283 | 0.000507744 | POC1 centriolar protein A                                                     |
| ENSG00000161996  | -1.02 | 6.18  | 3.9295E-05  | 0.000204309 | WD repeat domain 90                                                           |
| ENSG00000132819  | -1.02 | 5.82  | 7.66378E-05 | 0.000370463 | RNA binding motif protein 38                                                  |
| ENSG00000273562  | -1.02 | 6.91  | 1.4466E-06  | 1.07575E-05 | nucleosome assembly protein 1-like 4                                          |
| ENSG00000141522  | -1.02 | 8.98  | 2.40679E-05 | 0.000132179 | Rho GDP dissociation inhibitor (GDI) alpha                                    |
| ENSG00000111144  | -1.02 | 6.02  | 0.000103192 | 0.000481636 | leukotriene A4 hydrolase                                                      |
| ENSG00000111667  | -1.02 | 5.20  | 1.56188E-05 | 8.98672E-05 | ubiquitin specific peptidase 5 (isopeptidase T)                               |
| ENSG00000103148  | -1.02 | 5.02  | 2.89801E-05 | 0.000156248 | NPR3-like, GATOR1 complex subunit                                             |
| ENSG00000086289  | -1.02 | 4.25  | 0.000635816 | 0.002373401 | ependymin related 1                                                           |
| ENSG00000160949  | -1.02 | 6.37  | 7.36501E-05 | 0.000357975 | tonsoku-like, DNA repair protein                                              |
| ENSG00000146463  | -1.02 | 6.65  | 1.57207E-06 | 1.15756E-05 | zinc finger, MYM-type 4                                                       |
| ENSG00000137288  | -1.02 | 5.29  | 6.46626E-06 | 4.11276E-05 | ubiquinol-cytochrome c reductase complex assembly factor 2                    |
| ENSG00000175634  | -1.03 | 5.54  | 5.26048E-06 | 3.41122E-05 | ribosomal protein S6 kinase, 70kDa, polypeptide 2                             |
| ENSG00000095319  | -1.03 | 6.96  | 2.78122E-05 | 0.000150686 | nucleoporin 188kDa                                                            |
| ENSG00000001497  | -1.03 | 5.91  | 1.26233E-05 | 7.45714E-05 | LAS1-like, ribosome biogenesis factor                                         |
| ENSG00000113048  | -1.03 | 5.81  | 4.10303E-06 | 2.74238E-05 | mitochondrial ribosomal protein S27                                           |
| ENSG00000106628  | -1.03 | 7.09  | 9.29145E-07 | 7.28498E-06 | polymerase (DNA directed), delta 2, accessory subunit                         |
| ENSG00000165792  | -1.03 | 6.31  | 5.90435E-06 | 3.78803E-05 | methyltransferase like 17                                                     |
| ENSG00000118900  | -1.03 | 5.92  | 0.000116511 | 0.000536817 | ubiquitin 1                                                                   |
| ENSG00000008441  | -1.03 | 4.38  | 0.000626907 | 0.002344104 | nuclear factor I/X (CCAAT-binding transcription factor)                       |
| ENSG00000162613  | -1.03 | 6.84  | 8.57722E-07 | 6.78106E-06 | far upstream element (FUSE) binding protein 1                                 |
| ENSG00000128309  | -1.03 | 4.67  | 7.52059E-05 | 0.000364337 | mercaptopyruvate sulfurtransferase                                            |
| ENSG00000166987  | -1.04 | 6.46  | 5.17989E-05 | 0.000262234 | methyl-CpG binding domain protein 6                                           |
| ENSG00000168439  | -1.04 | 7.88  | 9.90955E-07 | 7.70588E-06 | stress-induced phosphoprotein 1                                               |
| ENSG00000132323  | -1.04 | 5.26  | 6.69523E-06 | 4.24213E-05 | integrin-linked kinase-associated serine/threonine phosphatase                |
| ENSG00000157193  | -1.04 | 5.90  | 9.30708E-06 | 5.69057E-05 | low density lipoprotein receptor-related protein 8, apolipoprotein e receptor |
| ENSG00000089280  | -1.04 | 8.85  | 5.31887E-06 | 3.4474E-05  | FUS RNA binding protein                                                       |
| ENSG00000186501  | -1.04 | 5.39  | 1.0219E-05  | 6.19112E-05 | transmembrane protein 222                                                     |
| ENSG00000160131  | -1.04 | 6.52  | 1.40074E-06 | 1.04399E-05 | VMA21 vacuolar H+-ATPase homolog (S. cerevisiae)                              |
| ENSG00000165688  | -1.04 | 6.39  | 4.60423E-06 | 3.02407E-05 | peptidase (mitochondrial processing) alpha                                    |
| ENSG00000163349  | -1.04 | 6.18  | 2.71112E-05 | 0.000147429 | homeodomain interacting protein kinase 1                                      |
| ENSG00000153574  | -1.04 | 5.49  | 2.82626E-05 | 0.00015272  | ribose 5-phosphate isomerase A                                                |

|                 |       |      |             |             |                                                                                                      |
|-----------------|-------|------|-------------|-------------|------------------------------------------------------------------------------------------------------|
| ENSG00000261739 | -1.04 | 7.00 | 9.45392E-07 | 7.39925E-06 | golgin A8 family, member S                                                                           |
| ENSG00000008853 | -1.04 | 4.30 | 0.000175732 | 0.000771129 | Rho-related BTB domain containing 2                                                                  |
| ENSG00000013306 | -1.04 | 6.19 | 1.64876E-06 | 1.20781E-05 | solute carrier family 25, member 39                                                                  |
| ENSG00000169914 | -1.04 | 4.34 | 0.000130459 | 0.000592419 | OTU deubiquitinase 3                                                                                 |
| ENSG00000280987 | -1.04 | 7.95 | 6.41944E-07 | 5.2438E-06  | matrin 3                                                                                             |
| ENSG00000007080 | -1.04 | 5.30 | 6.05157E-06 | 3.87125E-05 | coiled-coil domain containing 124                                                                    |
| ENSG00000004455 | -1.05 | 9.49 | 6.62154E-05 | 0.000326483 | adenylate kinase 2                                                                                   |
| ENSG00000241945 | -1.05 | 5.95 | 1.9386E-05  | 0.000109316 | PWP2 periodic tryptophan protein homolog (yeast)                                                     |
| ENSG00000138363 | -1.05 | 6.47 | 9.47242E-06 | 5.78622E-05 | 5-aminoimidazole-4-carboxamide ribonucleotide formyltransferase/IMP cyclohydrolase                   |
| ENSG00000167721 | -1.05 | 5.51 | 7.93094E-06 | 4.94018E-05 | TSR1, 20S rRNA accumulation, homolog (S. cerevisiae)                                                 |
| ENSG00000234495 | -1.05 | 7.47 | 4.61279E-07 | 3.86554E-06 | tripartite motif containing 27                                                                       |
| ENSG00000170085 | -1.05 | 5.21 | 8.17517E-06 | 5.06853E-05 | SUMO-interacting motifs containing 1                                                                 |
| ENSG00000178952 | -1.05 | 7.62 | 6.52135E-07 | 5.30744E-06 | Tu translation elongation factor, mitochondrial                                                      |
| ENSG00000163875 | -1.05 | 5.42 | 6.74702E-06 | 4.27263E-05 | MYST/Esa1-associated factor 6                                                                        |
| ENSG00000146223 | -1.05 | 7.93 | 3.93665E-06 | 2.64851E-05 | ribosomal protein L7-like 1                                                                          |
| ENSG00000134440 | -1.05 | 7.70 | 7.20526E-07 | 5.80004E-06 | asparaginyl-tRNA synthetase                                                                          |
| ENSG00000110721 | -1.05 | 5.87 | 2.38839E-06 | 1.68675E-05 | choline kinase alpha                                                                                 |
| ENSG00000096746 | -1.05 | 7.40 | 1.37312E-06 | 1.02571E-05 | heterogeneous nuclear ribonucleoprotein H3 (2H9)                                                     |
| ENSG00000198301 | -1.05 | 5.76 | 2.65825E-06 | 1.864E-05   | SDA1 domain containing 1                                                                             |
| ENSG00000171612 | -1.05 | 4.36 | 0.000470696 | 0.001815757 | solute carrier family 25 (pyrimidine nucleotide carrier), member 33                                  |
| ENSG00000164024 | -1.05 | 5.65 | 9.18278E-06 | 5.62955E-05 | methionyl aminopeptidase 1                                                                           |
| ENSG00000261221 | -1.05 | 4.43 | 0.000120218 | 0.000550836 | zinc finger protein 865                                                                              |
| ENSG00000189306 | -1.05 | 5.39 | 3.61454E-06 | 2.45545E-05 | ribosomal RNA processing 7 homolog A                                                                 |
| ENSG00000196700 | -1.05 | 5.51 | 5.05944E-05 | 0.000257342 | zinc finger protein 512B                                                                             |
| ENSG00000118640 | -1.06 | 7.88 | 6.33958E-07 | 5.18175E-06 | vesicle-associated membrane protein 8                                                                |
| ENSG00000276187 | -1.06 | 4.39 | 0.000136279 | 0.000615715 | ER membrane-associated RNA degradation                                                               |
| ENSG00000071626 | -1.06 | 7.83 | 4.92541E-07 | 4.09136E-06 | DAZ associated protein 1                                                                             |
| ENSG00000211460 | -1.06 | 7.02 | 3.51824E-07 | 3.01687E-06 | translin                                                                                             |
| ENSG00000025796 | -1.06 | 7.41 | 7.6791E-06  | 4.79908E-05 | SEC63 homolog (S. cerevisiae)                                                                        |
| ENSG00000115306 | -1.06 | 6.30 | 1.82158E-06 | 1.31769E-05 | spectrin, beta, non-erythrocytic 1                                                                   |
| ENSG00000169750 | -1.06 | 4.93 | 5.15411E-05 | 0.000261428 | ras-related C3 botulinum toxin substrate 3 (rho family, small GTP binding protein Rac3)              |
| ENSG00000118508 | -1.06 | 6.49 | 1.40906E-05 | 8.19985E-05 | RAB32, member RAS oncogene family                                                                    |
| ENSG00000090376 | -1.07 | 6.89 | 8.80764E-07 | 6.94255E-06 | interleukin-1 receptor-associated kinase 3                                                           |
| ENSG00000105472 | -1.07 | 8.83 | 7.79564E-06 | 4.86504E-05 | C-type lectin domain family 11, member A                                                             |
| ENSG00000035115 | -1.07 | 4.86 | 2.19899E-05 | 0.00012208  | SH3 and SYLF domain containing 1                                                                     |
| ENSG00000128050 | -1.07 | 7.73 | 4.60771E-07 | 3.86373E-06 | phosphoribosylaminoimidazole carboxylase, phosphoribosylaminoimidazole succinocarboxamide synthetase |
| ENSG00000039123 | -1.07 | 6.24 | 8.02649E-07 | 6.39902E-06 | superkiller viralicidic activity 2-like 2 (S. cerevisiae)                                            |
| ENSG00000110075 | -1.07 | 6.63 | 5.27641E-07 | 4.35837E-06 | protein phosphatase 6, regulatory subunit 3                                                          |
| ENSG00000139437 | -1.07 | 4.82 | 3.94026E-05 | 0.000204789 | trichoplein, keratin filament binding                                                                |
| ENSG00000103319 | -1.07 | 4.93 | 2.06234E-05 | 0.000115411 | eukaryotic elongation factor 2 kinase                                                                |
| ENSG00000119707 | -1.07 | 7.27 | 2.63877E-07 | 2.33203E-06 | RNA binding motif protein 25                                                                         |
| ENSG00000169660 | -1.07 | 5.25 | 9.41957E-06 | 5.7567E-05  | hexosaminidase (glycosyl hydrolase family 20, catalytic domain) containing                           |
| ENSG00000086504 | -1.07 | 5.73 | 1.22364E-06 | 9.23923E-06 | mitochondrial ribosomal protein L28                                                                  |
| ENSG00000170606 | -1.07 | 7.10 | 3.42924E-07 | 2.95199E-06 | heat shock 70kDa protein 4                                                                           |
| ENSG00000215440 | -1.07 | 4.53 | 5.68039E-05 | 0.000284641 | aminopeptidase-like 1                                                                                |
| ENSG00000163528 | -1.07 | 4.53 | 0.002564821 | 0.007928607 | coiled-coil-helix-coiled-coil-helix domain containing 4                                              |
| ENSG00000136463 | -1.07 | 4.52 | 8.05663E-05 | 0.000386637 | translational activator of mitochondrially encoded cytochrome c oxidase I                            |
| ENSG00000230124 | -1.07 | 4.68 | 4.19501E-05 | 0.000217348 | acyl-CoA binding domain containing 6                                                                 |
| ENSG00000184428 | -1.08 | 6.11 | 3.34342E-05 | 0.000177027 | topoisomerase (DNA) I, mitochondrial                                                                 |
| ENSG00000156261 | -1.08 | 8.48 | 1.23986E-06 | 9.35637E-06 | chaperonin containing TCP1, subunit 8 (theta)                                                        |
| ENSG00000145191 | -1.08 | 6.44 | 1.02074E-06 | 7.89584E-06 | eukaryotic translation initiation factor 2B, subunit 5 epsilon, 82kDa                                |
| ENSG00000106415 | -1.08 | 4.35 | 0.000157556 | 0.0007004   | glucocorticoid induced 1                                                                             |
| ENSG00000108773 | -1.08 | 6.10 | 9.5315E-07  | 7.4468E-06  | K(lysine) acetyltransferase 2A                                                                       |
| ENSG00000114030 | -1.08 | 6.17 | 1.95824E-06 | 1.40735E-05 | karyopherin alpha 1 (importin alpha 5)                                                               |
| ENSG00000175471 | -1.08 | 5.88 | 9.70027E-06 | 5.91191E-05 | multiple C2 domains, transmembrane 1                                                                 |
| ENSG00000198160 | -1.08 | 5.65 | 3.77631E-06 | 2.55098E-05 | mesoderm induction early response 1, transcriptional regulator                                       |
| ENSG00000135776 | -1.08 | 5.90 | 2.09407E-06 | 1.49606E-05 | ATP-binding cassette, sub-family B (MDR/TAP), member 10                                              |
| ENSG00000160221 | -1.08 | 7.48 | 1.91357E-07 | 1.74874E-06 | chromosome 21 open reading frame 33                                                                  |
| ENSG00000005801 | -1.08 | 5.40 | 3.25519E-06 | 2.23535E-05 | zinc finger protein 195                                                                              |
| ENSG00000104522 | -1.08 | 5.75 | 8.19445E-07 | 6.50557E-06 | tissue specific transplantation antigen P35B                                                         |
| ENSG00000187961 | -1.08 | 4.30 | 0.000135958 | 0.000614651 | kelch-like family member 17                                                                          |
| ENSG00000152234 | -1.08 | 8.95 | 2.88088E-06 | 2.00109E-05 | ATP synthase, H+ transporting, mitochondrial F1 complex, alpha subunit 1, cardiac muscle             |
| ENSG00000184967 | -1.08 | 4.43 | 8.10308E-05 | 0.000388725 | nucleolar complex associated 4 homolog                                                               |
| ENSG00000196756 | -1.09 | 5.66 | 1.05802E-06 | 8.14628E-06 | small nucleolar RNA host gene 17                                                                     |
| ENSG00000154174 | -1.09 | 6.68 | 3.73765E-07 | 3.18853E-06 | translocase of outer mitochondrial membrane 70 homolog A (S. cerevisiae)                             |
| ENSG00000109689 | -1.09 | 4.98 | 8.90585E-06 | 5.47551E-05 | stromal interaction molecule 2                                                                       |
| ENSG00000101194 | -1.09 | 6.05 | 1.15759E-06 | 8.79057E-06 | solute carrier family 17 (vesicular nucleotide transporter), member 9                                |
| ENSG00000116489 | -1.09 | 8.58 | 1.69297E-06 | 1.23407E-05 | capping protein (actin filament) muscle Z-line, alpha 1                                              |
| ENSG00000274523 | -1.09 | 5.75 | 2.37765E-06 | 1.68232E-05 | Williams-Beuren syndrome chromosome region 16                                                        |
| ENSG00000100220 | -1.09 | 5.04 | 6.63807E-05 | 0.000326831 | RNA 2',3'-cyclic phosphate and 5'-OH ligase                                                          |
| ENSG00000277278 | -1.09 | 5.99 | 6.27432E-06 | 4.00218E-05 | HECT and RLD domain containing E3 ubiquitin protein ligase 2                                         |



|                 |       |      |             |             |                                                                                                                                         |
|-----------------|-------|------|-------------|-------------|-----------------------------------------------------------------------------------------------------------------------------------------|
| ENSG00000120685 | -1.09 | 5.09 | 1.49394E-05 | 8.637E-05   | proline and serine rich 1                                                                                                               |
| ENSG00000130731 | -1.09 | 5.24 | 3.14945E-06 | 2.16723E-05 | chromosome 16 open reading frame 13                                                                                                     |
| ENSG00000130935 | -1.09 | 6.48 | 1.76317E-06 | 1.27892E-05 | nucleolar protein 11                                                                                                                    |
| ENSG00000162607 | -1.09 | 6.38 | 1.27684E-06 | 9.60666E-06 | ubiquitin specific peptidase 1                                                                                                          |
| ENSG00000147813 | -1.09 | 6.28 | 5.22291E-07 | 4.31956E-06 | nicotinate phosphoribosyltransferase                                                                                                    |
| ENSG00000115419 | -1.09 | 6.15 | 8.71613E-07 | 6.88268E-06 | glutaminase                                                                                                                             |
| ENSG00000165699 | -1.09 | 5.07 | 8.65547E-06 | 5.34136E-05 | tuberous sclerosis 1                                                                                                                    |
| ENSG00000100216 | -1.09 | 5.41 | 3.58377E-06 | 2.44192E-05 | translocase of outer mitochondrial membrane 22 homolog (yeast)                                                                          |
| ENSG00000173638 | -1.09 | 7.27 | 0.000259147 | 0.001080717 | solute carrier family 19 (folate transporter), member 1                                                                                 |
| ENSG00000110080 | -1.09 | 6.11 | 4.14835E-06 | 2.76709E-05 | ST3 beta-galactoside alpha-2,3-sialyltransferase 4                                                                                      |
| ENSG00000099804 | -1.09 | 5.57 | 7.92181E-06 | 4.93681E-05 | cell division cycle 34                                                                                                                  |
| ENSG00000275700 | -1.09 | 5.60 | 1.37202E-06 | 1.02546E-05 | apoptosis antagonizing transcription factor                                                                                             |
| ENSG00000134697 | -1.09 | 6.37 | 6.43806E-07 | 5.25577E-06 | guanine nucleotide binding protein-like 2 (nucleolar)                                                                                   |
| ENSG00000125912 | -1.10 | 7.07 | 5.95061E-05 | 0.000296392 | nicalin                                                                                                                                 |
| ENSG00000004487 | -1.10 | 6.60 | 3.99303E-06 | 2.68101E-05 | lysine (K)-specific demethylase 1A                                                                                                      |
| ENSG00000115827 | -1.10 | 4.29 | 6.92354E-05 | 0.000339001 | DDB1 and CUL4 associated factor 17                                                                                                      |
| ENSG00000165733 | -1.10 | 5.86 | 2.33173E-06 | 1.65522E-05 | BMS1 ribosome biogenesis factor                                                                                                         |
| ENSG00000167969 | -1.10 | 4.43 | 5.92881E-05 | 0.000295527 | enoyl-CoA delta isomerase 1                                                                                                             |
| ENSG00000075240 | -1.10 | 5.71 | 9.20484E-06 | 5.63584E-05 | GRAM domain containing 4                                                                                                                |
| ENSG00000164654 | -1.10 | 4.54 | 4.44044E-05 | 0.000228992 | missing oocyte, meiosis regulator, homolog (Drosophila)                                                                                 |
| ENSG00000121210 | -1.10 | 4.96 | 1.00432E-05 | 6.1041E-05  | KIAA0922                                                                                                                                |
| ENSG00000124784 | -1.10 | 5.82 | 1.46444E-06 | 1.08658E-05 | RIO kinase 1                                                                                                                            |
| ENSG00000075856 | -1.10 | 4.80 | 0.000186596 | 0.000811025 | squamous cell carcinoma antigen recognized by T cells 3                                                                                 |
| ENSG00000151849 | -1.10 | 4.90 | 1.2569E-05  | 7.435E-05   | centromere protein J                                                                                                                    |
| ENSG00000067533 | -1.10 | 4.71 | 5.0678E-05  | 0.000257542 | ribosomal RNA processing 15 homolog                                                                                                     |
| ENSG00000120694 | -1.10 | 7.21 | 8.17102E-05 | 0.000391277 | heat shock 105kDa/110kDa protein 1                                                                                                      |
| ENSG00000136682 | -1.10 | 6.46 | 2.18275E-06 | 1.55606E-05 | COBW domain containing 2                                                                                                                |
| ENSG00000112208 | -1.11 | 5.26 | 1.65282E-05 | 9.47714E-05 | BCL2-associated athanogene 2                                                                                                            |
| ENSG00000004809 | -1.11 | 4.95 | 2.19527E-05 | 0.000121925 | solute carrier family 22 (organic cation/carnitine transporter), member 16                                                              |
| ENSG00000164933 | -1.11 | 5.37 | 1.50226E-06 | 1.11154E-05 | solute carrier family 25 (mitochondrial folate carrier), member 32                                                                      |
| ENSG00000118308 | -1.11 | 5.83 | 0.001967613 | 0.00630263  | lymphoid-restricted membrane protein                                                                                                    |
| ENSG00000071859 | -1.11 | 5.61 | 1.51465E-06 | 1.11759E-05 | family with sequence similarity 50, member A                                                                                            |
| ENSG00000116459 | -1.11 | 7.69 | 2.19135E-07 | 1.97743E-06 | ATP synthase, H+ transporting, mitochondrial Fo complex, subunit B1                                                                     |
| ENSG00000116133 | -1.11 | 8.41 | 1.93093E-06 | 1.39073E-05 | 24-dehydrocholesterol reductase                                                                                                         |
| ENSG00000174579 | -1.11 | 5.60 | 1.83329E-06 | 9.64577E-06 | male-specific lethal 2 homolog (Drosophila)                                                                                             |
| ENSG00000128059 | -1.11 | 5.25 | 1.73085E-06 | 1.25754E-05 | phosphoribosyl pyrophosphate amidotransferase                                                                                           |
| ENSG00000164050 | -1.11 | 4.78 | 6.33709E-05 | 0.000313758 | plexin B1                                                                                                                               |
| ENSG00000100714 | -1.11 | 6.80 | 2.04892E-07 | 1.86029E-06 | methylenetetrahydrofolate dehydrogenase (NADP+ dependent) 1, methenyltetrahydrofolate cyclohydrolase, formyltetrahydrofolate synthetase |
| ENSG00000138758 | -1.11 | 6.17 | 4.10537E-07 | 3.46659E-06 | septin 11                                                                                                                               |
| ENSG00000197774 | -1.11 | 4.44 | 0.000984254 | 0.00346037  | essential meiotic structure-specific endonuclease subunit 2                                                                             |
| ENSG00000162384 | -1.11 | 5.02 | 7.47133E-06 | 4.67583E-05 | chromosome 1 open reading frame 123                                                                                                     |
| ENSG00000103495 | -1.11 | 8.36 | 3.9661E-06  | 2.66562E-05 | MYC-associated zinc finger protein (purine-binding transcription factor)                                                                |
| ENSG00000024526 | -1.12 | 5.01 | 0.002134052 | 0.006762332 | DEP domain containing 1                                                                                                                 |
| ENSG0000007312  | -1.12 | 6.48 | 1.48189E-06 | 1.09771E-05 | small nuclear ribonucleoprotein polypeptide A                                                                                           |
| ENSG00000196547 | -1.12 | 7.00 | 7.99237E-08 | 7.97076E-07 | mannosidase, alpha, class 2A, member 2                                                                                                  |
| ENSG00000099783 | -1.12 | 8.40 | 3.64749E-07 | 3.11964E-06 | heterogeneous nuclear ribonucleoprotein M                                                                                               |
| ENSG00000023734 | -1.12 | 5.92 | 6.54944E-07 | 5.32501E-06 | serine/threonine kinase receptor associated protein                                                                                     |
| ENSG00000106554 | -1.12 | 6.69 | 1.6205E-06  | 1.1904E-05  | coiled-coil-helix-coiled-coil-helix domain containing 3                                                                                 |
| ENSG00000115761 | -1.12 | 5.12 | 2.89096E-06 | 2.00599E-05 | nucleolar protein 10                                                                                                                    |
| ENSG00000164880 | -1.12 | 6.88 | 1.14013E-07 | 1.09747E-06 | integrator complex subunit 1                                                                                                            |
| ENSG00000123505 | -1.12 | 7.18 | 7.47142E-08 | 7.52471E-07 | adenosylmethionine decarboxylase 1                                                                                                      |
| ENSG00000130204 | -1.12 | 6.94 | 1.62616E-06 | 1.19324E-05 | translocase of outer mitochondrial membrane 40 homolog (yeast)                                                                          |
| ENSG00000175376 | -1.12 | 5.21 | 1.46118E-06 | 1.08538E-05 | eukaryotic translation initiation factor 1A domain containing                                                                           |
| ENSG00000079134 | -1.12 | 5.60 | 8.08145E-07 | 6.43124E-06 | THO complex 1                                                                                                                           |
| ENSG00000114770 | -1.12 | 4.42 | 2.59891E-05 | 0.000141734 | ATP-binding cassette, sub-family C (CFTR/MRP), member 5                                                                                 |
| ENSG00000157778 | -1.12 | 5.09 | 4.80116E-06 | 3.13481E-05 | proteasome (prosome, macropain) assembly chaperone 3                                                                                    |
| ENSG00000141456 | -1.13 | 5.00 | 4.6023E-06  | 3.02407E-05 | proline, glutamate and leucine rich protein 1                                                                                           |
| ENSG00000234032 | -1.13 | 6.06 | 8.28639E-07 | 6.5707E-06  | valyl-tRNA synthetase 2, mitochondrial                                                                                                  |
| ENSG00000149115 | -1.13 | 4.68 | 0.000135326 | 0.000612033 | tankyrase 1 binding protein 1, 182kDa                                                                                                   |
| ENSG00000006652 | -1.13 | 5.54 | 1.80656E-05 | 0.000102655 | interferon-related developmental regulator 1                                                                                            |
| ENSG00000155850 | -1.13 | 4.65 | 0.000114212 | 0.000527688 | solute carrier family 26 (anion exchanger), member 2                                                                                    |
| ENSG00000100359 | -1.13 | 5.01 | 7.69562E-06 | 4.80714E-05 | small G protein signaling modulator 3                                                                                                   |
| ENSG00000187051 | -1.13 | 4.62 | 5.05999E-05 | 0.000257342 | ribosomal protein S19 binding protein 1                                                                                                 |
| ENSG00000213465 | -1.13 | 6.03 | 2.23076E-07 | 2.00754E-06 | ADP-ribosylation factor-like 2                                                                                                          |
| ENSG00000085415 | -1.13 | 6.40 | 8.71968E-06 | 5.37456E-05 | SEH1-like nucleoporin                                                                                                                   |
| ENSG00000168259 | -1.13 | 6.15 | 1.04944E-06 | 8.10298E-06 | DnaJ (Hsp40) homolog, subfamily C, member 7                                                                                             |
| ENSG00000148296 | -1.13 | 5.84 | 1.01782E-06 | 7.88265E-06 | surfeit 6                                                                                                                               |
| ENSG00000138698 | -1.13 | 5.56 | 1.25224E-06 | 9.43525E-06 | RAP1, GTP-GDP dissociation stimulator 1                                                                                                 |
| ENSG00000184164 | -1.13 | 5.57 | 3.00965E-05 | 0.000161611 | cysteine-rich with EGF-like domains 2                                                                                                   |
| ENSG00000176058 | -1.13 | 4.21 | 0.001204948 | 0.004122288 | taperin                                                                                                                                 |
| ENSG00000065060 | -1.13 | 5.19 | 5.18548E-06 | 3.36752E-05 | UHRF1 binding protein 1                                                                                                                 |
| ENSG00000100722 | -1.13 | 5.13 | 1.68084E-06 | 1.22726E-05 | zinc finger CCHC-type containing 14                                                                                                     |

|                  |       |      |             |             |                                                                                                                  |
|------------------|-------|------|-------------|-------------|------------------------------------------------------------------------------------------------------------------|
| ENSG00000163257  | -1.13 | 5.06 | 2.33811E-05 | 0.000128994 | DDB1 and CUL4 associated factor 16                                                                               |
| ENSG00000275176  | -1.13 | 6.21 | 4.25291E-07 | 3.57978E-06 | acetyl-CoA carboxylase alpha                                                                                     |
| ENSG00000107262  | -1.13 | 6.28 | 6.82506E-06 | 4.31203E-05 | BCL2-associated athanogene                                                                                       |
| ENSG00000168906  | -1.13 | 8.90 | 1.19133E-06 | 9.02096E-06 | methionine adenosyltransferase II, alpha                                                                         |
| ENSG00000185104  | -1.14 | 6.31 | 2.86965E-07 | 2.50768E-06 | Fas (TNFRSF6) associated factor 1                                                                                |
| ENSG00000187954  | -1.14 | 5.70 | 3.82051E-07 | 3.25504E-06 | cysteine/histidine-rich 1                                                                                        |
| ENSG00000158882  | -1.14 | 5.19 | 2.48033E-06 | 1.74848E-05 | translocase of outer mitochondrial membrane 40 homolog (yeast)-like                                              |
| ENSG00000141385  | -1.14 | 5.80 | 0.000115525 | 0.000532828 | AFG3-like AAA ATPase 2                                                                                           |
| ENSG00000168944  | -1.14 | 4.62 | 0.002453145 | 0.007629579 | centrosomal protein 120kDa                                                                                       |
| ENSG00000119929  | -1.14 | 4.65 | 2.96893E-05 | 0.000159617 | cutC copper transporter                                                                                          |
| ENSG00000132953  | -1.14 | 5.76 | 1.17184E-06 | 8.88858E-06 | exportin 4                                                                                                       |
| ENSG00000116120  | -1.14 | 5.96 | 2.57899E-07 | 2.28375E-06 | phenylalanyl-tRNA synthetase, beta subunit                                                                       |
| ENSG00000180198  | -1.14 | 7.00 | 8.09196E-08 | 8.05796E-07 | regulator of chromosome condensation 1                                                                           |
| ENSG00000127837  | -1.14 | 6.00 | 3.92373E-07 | 3.33239E-06 | angio-associated, migratory cell protein                                                                         |
| ENSG00000138399  | -1.14 | 6.00 | 1.43235E-07 | 1.34844E-06 | FAST kinase domains 1                                                                                            |
| ENSG00000130024  | -1.14 | 7.69 | 0.000112996 | 0.000523345 | PHD finger protein 10                                                                                            |
| ENSG00000087191  | -1.14 | 7.28 | 3.67454E-08 | 3.92089E-07 | proteasome (prosome, macropain) 26S subunit, ATPase, 5                                                           |
| ENSG00000116791  | -1.14 | 4.29 | 8.83294E-05 | 0.000418744 | crystallin, zeta (quinone reductase)                                                                             |
| ENSG00000166986  | -1.14 | 7.02 | 0.000577181 | 0.002175325 | methionyl-tRNA synthetase                                                                                        |
| ENSG00000112640  | -1.14 | 5.77 | 1.04996E-06 | 8.10298E-06 | protein phosphatase 2, regulatory subunit B', delta                                                              |
| ENSG00000120948  | -1.15 | 7.72 | 3.50922E-07 | 3.01302E-06 | TAR DNA binding protein                                                                                          |
| ENSG00000146701  | -1.15 | 7.75 | 7.79612E-08 | 7.81614E-07 | malate dehydrogenase 2, NAD (mitochondrial)                                                                      |
| ENSG00000130810  | -1.15 | 5.32 | 9.09596E-06 | 5.58205E-05 | peter pan homolog (Drosophila)                                                                                   |
| ENSG00000173457  | -1.15 | 6.54 | 2.46862E-07 | 2.19628E-06 | protein phosphatase 1, regulatory (inhibitor) subunit 14B                                                        |
| ENSG00000182162  | -1.15 | 6.47 | 4.69972E-06 | 3.07614E-05 | purinergic receptor P2Y, G-protein coupled, 8                                                                    |
| ENSG00000008838  | -1.15 | 6.10 | 5.71719E-07 | 4.70198E-06 | mediator complex subunit 24                                                                                      |
| ENSG00000100029  | -1.15 | 5.43 | 7.09328E-07 | 5.71683E-06 | pescadillo ribosomal biogenesis factor 1                                                                         |
| ENSG00000162852  | -1.15 | 4.85 | 2.30858E-05 | 0.000127472 | consortin, connexin sorting protein                                                                              |
| ENSG00000169718  | -1.15 | 7.55 | 1.08834E-06 | 8.34579E-06 | dihydrouridine synthase 1-like                                                                                   |
| ENSG00000116898  | -1.15 | 5.76 | 2.06994E-06 | 1.48201E-05 | mitochondrial ribosomal protein S15                                                                              |
| ENSG000000083750 | -1.15 | 4.61 | 0.000537773 | 0.002039544 | Ras-related GTP binding B                                                                                        |
| ENSG00000145907  | -1.15 | 7.49 | 2.7187E-07  | 2.38835E-06 | GTPase activating protein (SH3 domain) binding protein 1                                                         |
| ENSG00000163539  | -1.15 | 6.16 | 1.32819E-07 | 1.26021E-06 | cytoplasmic linker associated protein 2                                                                          |
| ENSG00000104164  | -1.15 | 5.50 | 2.75746E-05 | 0.000149642 | biogenesis of lysosomal organelles complex-1, subunit 6, pallidin                                                |
| ENSG0000012983   | -1.15 | 4.95 | 5.45518E-06 | 3.52885E-05 | mitogen-activated protein kinase kinase kinase 5                                                                 |
| ENSG00000166411  | -1.15 | 5.95 | 2.57087E-07 | 2.27809E-06 | isocitrate dehydrogenase 3 (NAD+) alpha                                                                          |
| ENSG00000128191  | -1.16 | 5.17 | 1.68046E-06 | 1.22726E-05 | DGCR8 microprocessor complex subunit                                                                             |
| ENSG00000125247  | -1.16 | 5.23 | 9.69706E-07 | 7.5836E-06  | transmembrane and tetratricopeptide repeat containing 4                                                          |
| ENSG00000138668  | -1.16 | 8.62 | 3.95177E-07 | 3.35181E-06 | heterogeneous nuclear ribonucleoprotein D (AU-rich element RNA binding protein 1, 37kDa)                         |
| ENSG00000177830  | -1.16 | 6.51 | 8.86552E-08 | 8.73004E-07 | chitinase domain containing 1                                                                                    |
| ENSG00000129351  | -1.16 | 8.68 | 3.17226E-07 | 2.74502E-06 | interleukin enhancer binding factor 3, 90kDa                                                                     |
| ENSG00000100410  | -1.16 | 4.36 | 1.88179E-05 | 0.000106474 | PHD finger protein 5A                                                                                            |
| ENSG00000138442  | -1.16 | 6.22 | 1.25573E-07 | 1.19917E-06 | WD repeat domain 12                                                                                              |
| ENSG00000124181  | -1.16 | 4.87 | 6.89287E-06 | 4.34867E-05 | phospholipase C, gamma 1                                                                                         |
| ENSG00000105063  | -1.16 | 8.16 | 1.12765E-06 | 8.5976E-06  | protein phosphatase 6, regulatory subunit 1                                                                      |
| ENSG00000084090  | -1.16 | 7.87 | 1.48387E-07 | 1.39398E-06 | STAR-related lipid transfer (START) domain containing 7                                                          |
| ENSG00000150768  | -1.16 | 6.35 | 1.67919E-07 | 1.55762E-06 | dihydroliipoamide S-acetyltransferase                                                                            |
| ENSG00000162694  | -1.16 | 4.96 | 3.0006E-06  | 2.0734E-05  | exostosin-like glycosyltransferase 2                                                                             |
| ENSG00000037474  | -1.16 | 6.27 | 1.97637E-07 | 1.80057E-06 | NOP2/Sun RNA methyltransferase family, member 2                                                                  |
| ENSG00000197299  | -1.16 | 5.32 | 4.8062E-07  | 4.0099E-06  | Bloom syndrome, RecQ helicase-like                                                                               |
| ENSG00000185883  | -1.17 | 6.75 | 2.64963E-07 | 2.34006E-06 | ATPase, H+ transporting, lysosomal 16kDa, V0 subunit c                                                           |
| ENSG00000100060  | -1.17 | 6.08 | 3.70434E-06 | 2.50619E-05 | MFNG O-fucosylpeptide 3-beta-N-acetylglucosaminyltransferase                                                     |
| ENSG00000135624  | -1.17 | 8.17 | 2.53201E-07 | 2.24815E-06 | chaperonin containing TCP1, subunit 7 (eta)                                                                      |
| ENSG00000116560  | -1.17 | 8.79 | 6.67465E-07 | 5.42223E-06 | splicing factor proline/glutamine-rich                                                                           |
| ENSG00000196591  | -1.17 | 7.36 | 4.52724E-08 | 4.73932E-07 | histone deacetylase 2                                                                                            |
| ENSG00000135372  | -1.17 | 6.73 | 2.83546E-08 | 3.07499E-07 | N-acetyltransferase 10 (GCN5-related)                                                                            |
| ENSG00000169710  | -1.17 | 9.19 | 3.44212E-05 | 0.000181384 | fatty acid synthase                                                                                              |
| ENSG00000103202  | -1.17 | 6.09 | 1.59477E-06 | 1.17279E-05 | NME/NM23 nucleoside diphosphate kinase 4                                                                         |
| ENSG00000183431  | -1.17 | 6.81 | 2.29643E-08 | 2.54873E-07 | splicing factor 3a, subunit 3, 60kDa                                                                             |
| ENSG00000239285  | -1.17 | 4.62 | 8.83641E-06 | 5.44038E-05 | lymphocyte antigen 6 complex, locus G5B                                                                          |
| ENSG00000084073  | -1.17 | 6.00 | 1.64459E-07 | 1.52981E-06 | zinc metallopeptidase STE24                                                                                      |
| ENSG00000152117  | -1.17 | 5.41 | 9.8172E-07  | 7.63854E-06 | AC093838.4                                                                                                       |
| ENSG00000109586  | -1.17 | 6.04 | 0.000411366 | 0.001614092 | polypeptide N-acetylgalactosaminyltransferase 7                                                                  |
| ENSG00000138709  | -1.18 | 4.30 | 2.05542E-05 | 0.000115121 | La ribonucleoprotein domain family, member 1B                                                                    |
| ENSG00000085998  | -1.18 | 4.68 | 3.69346E-05 | 0.000192943 | protein O-linked mannose N-acetylglucosaminyltransferase 1 (beta 1,2-)                                           |
| ENSG00000084754  | -1.18 | 8.56 | 1.61257E-07 | 1.50213E-06 | hydroxyacyl-CoA dehydrogenase/3-ketoacyl-CoA thiolase/enoyl-CoA hydratase (trifunctional protein), alpha subunit |
| ENSG00000110200  | -1.18 | 4.32 | 0.000180333 | 0.00078845  | anaphase promoting complex subunit 15                                                                            |
| ENSG00000145494  | -1.18 | 5.46 | 2.28544E-07 | 2.05275E-06 | NADH dehydrogenase (ubiquinone) Fe-S protein 6, 13kDa (NADH-coenzyme Q reductase)                                |
| ENSG00000274081  | -1.18 | 6.64 | 1.29474E-06 | 9.72631E-06 | poly-U binding splicing factor 60kDa                                                                             |
| ENSG00000105176  | -1.18 | 5.85 | 1.06261E-06 | 8.17214E-06 | URI1, prefoldin-like chaperone                                                                                   |

|                 |       |       |             |             |                                                                                     |
|-----------------|-------|-------|-------------|-------------|-------------------------------------------------------------------------------------|
| ENSG00000115241 | -1.18 | 7.36  | 2.56572E-08 | 2.82166E-07 | protein phosphatase, Mg <sup>2+</sup> /Mn <sup>2+</sup> dependent, 1G               |
| ENSG00000146731 | -1.18 | 8.17  | 5.10328E-08 | 5.2964E-07  | chaperonin containing TCP1, subunit 6A (zeta 1)                                     |
| ENSG00000232045 | -1.18 | 6.64  | 8.91985E-08 | 8.77703E-07 | euchromatic histone-lysine N-methyltransferase 2                                    |
| ENSG00000077097 | -1.18 | 8.87  | 2.73271E-07 | 2.39908E-06 | topoisomerase (DNA) II beta 180kDa                                                  |
| ENSG00000163468 | -1.18 | 8.51  | 2.67315E-07 | 2.35614E-06 | chaperonin containing TCP1, subunit 3 (gamma)                                       |
| ENSG00000128626 | -1.19 | 5.14  | 6.29146E-05 | 0.000311731 | mitochondrial ribosomal protein S12                                                 |
| ENSG00000137449 | -1.19 | 4.24  | 0.000449669 | 0.001746314 | cytoplasmic polyadenylation element binding protein 2                               |
| ENSG00000130764 | -1.19 | 5.93  | 1.50407E-07 | 1.41095E-06 | leucine rich repeat containing 47                                                   |
| ENSG00000231502 | -1.19 | 5.51  | 2.41906E-06 | 1.70619E-05 | LSM2 homolog, U6 small nuclear RNA and mRNA degradation associated                  |
| ENSG00000141577 | -1.19 | 4.63  | 4.81954E-06 | 3.14371E-05 | centrosomal protein 131kDa                                                          |
| ENSG00000075239 | -1.19 | 6.24  | 1.87961E-07 | 1.72306E-06 | acetyl-CoA acetyltransferase 1                                                      |
| ENSG00000104903 | -1.19 | 6.13  | 1.10333E-06 | 8.43642E-06 | lymphoblastic leukemia associated hematopoiesis regulator 1                         |
| ENSG00000163597 | -1.19 | 6.89  | 1.3652E-08  | 1.60653E-07 | small nucleolar RNA host gene 16                                                    |
| ENSG00000108395 | -1.19 | 4.65  | 1.02564E-05 | 6.20809E-05 | tripartite motif containing 37                                                      |
| ENSG00000276681 | -1.19 | 8.13  | 6.61438E-08 | 6.71762E-07 | leukocyte receptor cluster (LRC) member 8                                           |
| ENSG00000092529 | -1.19 | 4.38  | 2.79626E-05 | 0.000151376 | calpain 3                                                                           |
| ENSG00000187630 | -1.19 | 4.51  | 1.4134E-05  | 8.2143E-05  | dehydrogenase/reductase (SDR family) member 4 like 2                                |
| ENSG00000011485 | -1.20 | 6.14  | 6.28229E-08 | 6.40977E-07 | protein phosphatase 5, catalytic subunit                                            |
| ENSG00000185803 | -1.20 | 5.82  | 8.85408E-06 | 5.44873E-05 | solute carrier family 52 (riboflavin transporter), member 2                         |
| ENSG00000204843 | -1.20 | 6.85  | 1.76106E-08 | 2.00827E-07 | dynactin 1                                                                          |
| ENSG00000152990 | -1.20 | 4.76  | 7.2206E-06  | 4.54247E-05 | adhesion G protein-coupled receptor A3                                              |
| ENSG00000107581 | -1.20 | 8.41  | 9.46648E-08 | 9.25317E-07 | eukaryotic translation initiation factor 3, subunit A                               |
| ENSG00000235125 | -1.20 | 4.33  | 5.3495E-05  | 0.000269792 | nuclear factor of kappa light polypeptide gene enhancer in B-cells inhibitor-like 1 |
| ENSG00000239900 | -1.20 | 5.33  | 1.35582E-07 | 1.28368E-06 | adenylosuccinate lyase                                                              |
| ENSG00000117448 | -1.20 | 6.70  | 1.12819E-08 | 1.35648E-07 | aldo-keto reductase family 1, member A1 (aldehyde reductase)                        |
| ENSG00000224531 | -1.21 | 4.47  | 1.13865E-05 | 6.81751E-05 | small integral membrane protein 13                                                  |
| ENSG00000091527 | -1.21 | 7.75  | 7.11929E-08 | 7.19189E-07 | CDV3 homolog (mouse)                                                                |
| ENSG00000196642 | -1.21 | 7.14  | 3.28447E-07 | 2.84026E-06 | RAB, member RAS oncogene family-like 6                                              |
| ENSG00000166669 | -1.21 | 4.57  | 1.7784E-05  | 0.000101142 | activating transcription factor 7 interacting protein 2                             |
| ENSG00000155189 | -1.21 | 6.05  | 1.88607E-07 | 1.72779E-06 | 1-acylglycerol-3-phosphate O-acyltransferase 5                                      |
| ENSG00000140474 | -1.21 | 6.35  | 2.9833E-08  | 3.23268E-07 | unc-51 like kinase 3                                                                |
| ENSG00000086848 | -1.21 | 4.22  | 1.19337E-05 | 7.10987E-05 | ALG9, alpha-1,2-mannosyltransferase                                                 |
| ENSG00000100448 | -1.21 | 11.92 | 0.000287631 | 0.001181315 | cathepsin G                                                                         |
| ENSG00000184465 | -1.21 | 5.00  | 2.29939E-05 | 0.000127122 | WD repeat domain 27                                                                 |
| ENSG00000125445 | -1.21 | 6.29  | 1.49949E-07 | 1.40766E-06 | mitochondrial ribosomal protein S7                                                  |
| ENSG00000170632 | -1.21 | 5.44  | 2.31614E-06 | 1.64585E-05 | armadillo repeat containing 10                                                      |
| ENSG00000198888 | -1.21 | 10.88 | 0.000465925 | 0.001798397 | mitochondrially encoded NADH dehydrogenase 1                                        |
| ENSG00000156876 | -1.21 | 4.48  | 1.35362E-05 | 7.92589E-05 | SAS-6 centriolar assembly protein                                                   |
| ENSG00000205903 | -1.22 | 4.25  | 0.000150452 | 0.000672879 | zinc finger protein 316                                                             |
| ENSG00000113360 | -1.22 | 5.57  | 2.10376E-07 | 1.90558E-06 | drosha, ribonuclease type III                                                       |
| ENSG00000112290 | -1.22 | 5.08  | 2.85739E-06 | 1.98581E-05 | WAS protein family, member 1                                                        |
| ENSG00000051128 | -1.22 | 6.06  | 3.99127E-08 | 4.21816E-07 | homer scaffolding protein 3                                                         |
| ENSG00000125630 | -1.22 | 5.62  | 5.20352E-08 | 5.38779E-07 | polymerase (RNA) I polypeptide B, 128kDa                                            |
| ENSG00000179304 | -1.22 | 4.94  | 1.72737E-06 | 1.25603E-05 | family with sequence similarity 156, member B                                       |
| ENSG00000148840 | -1.22 | 5.69  | 1.96159E-06 | 1.40823E-05 | peroxisome proliferator-activated receptor gamma, coactivator-related 1             |
| ENSG00000247982 | -1.22 | 7.28  | 1.40335E-08 | 1.64559E-07 | long intergenic non-protein coding RNA 926                                          |
| ENSG00000075415 | -1.22 | 7.12  | 3.94229E-09 | 5.18631E-08 | solute carrier family 25 (mitochondrial carrier; phosphate carrier), member 3       |
| ENSG00000256269 | -1.22 | 5.22  | 2.8365E-07  | 2.48198E-06 | hydroxymethylbilane synthase                                                        |
| ENSG00000107833 | -1.22 | 5.04  | 7.45233E-07 | 5.99165E-06 | nucleophosmin/nucleoplasmin 3                                                       |
| ENSG00000167136 | -1.22 | 4.32  | 1.83108E-05 | 0.000103915 | endonuclease G                                                                      |
| ENSG00000109534 | -1.22 | 5.08  | 3.87393E-07 | 3.29632E-06 | GAR1 homolog, ribonucleoprotein                                                     |
| ENSG00000065809 | -1.22 | 8.00  | 1.50999E-08 | 1.75207E-07 | family with sequence similarity 107, member B                                       |
| ENSG00000274811 | -1.22 | 6.65  | 7.91774E-08 | 7.90258E-07 | CLPTM1-like                                                                         |
| ENSG00000163938 | -1.22 | 7.05  | 1.21177E-08 | 1.44131E-07 | guanine nucleotide binding protein-like 3 (nucleolar)                               |
| ENSG00000169682 | -1.23 | 5.55  | 4.50924E-08 | 4.7242E-07  | spinster homolog 1 (Drosophila)                                                     |
| ENSG00000197451 | -1.23 | 7.50  | 2.25358E-08 | 2.50327E-07 | heterogeneous nuclear ribonucleoprotein A/B                                         |
| ENSG00000185420 | -1.23 | 5.30  | 2.30156E-05 | 0.000127189 | SET and MYND domain containing 3                                                    |
| ENSG00000141858 | -1.23 | 5.17  | 4.3714E-06  | 2.89406E-05 | sterile alpha motif domain containing 1                                             |
| ENSG00000085999 | -1.23 | 4.32  | 8.47648E-06 | 5.24554E-05 | RAD54-like (S. cerevisiae)                                                          |
| ENSG00000281184 | -1.23 | 7.20  | 1.80658E-09 | 2.53494E-08 | proteasome (prosome, macropain) subunit, beta type, 1                               |
| ENSG00000108651 | -1.23 | 5.94  | 1.32443E-07 | 1.25755E-06 | UTP6, small subunit (SSU) processome component, homolog (yeast)                     |
| ENSG00000100726 | -1.23 | 6.24  | 6.58508E-08 | 6.69298E-07 | telomere maintenance 2                                                              |
| ENSG00000164151 | -1.23 | 4.59  | 3.42439E-06 | 2.34306E-05 | interactor of little elongation complex ELL subunit 1                               |
| ENSG00000164045 | -1.24 | 5.00  | 1.20934E-05 | 7.19208E-05 | cell division cycle 25A                                                             |
| ENSG00000212907 | -1.24 | 9.34  | 0.001989879 | 0.006363203 | mitochondrially encoded NADH dehydrogenase 4L                                       |
| ENSG00000233369 | -1.24 | 4.45  | 7.3169E-05  | 0.000355898 | general transcription factor III, pseudogene 4                                      |
| ENSG00000182568 | -1.24 | 6.58  | 1.395E-08   | 1.63724E-07 | SATB homeobox 1                                                                     |
| ENSG00000136950 | -1.24 | 6.12  | 5.01491E-07 | 4.15789E-06 | actin related protein 2/3 complex, subunit 5-like                                   |
| ENSG00000168101 | -1.24 | 4.93  | 3.10003E-06 | 2.13654E-05 | nudix (nucleoside diphosphate linked moiety X)-type motif 16-like 1                 |
| ENSG00000152193 | -1.24 | 5.35  | 7.12902E-08 | 7.19624E-07 | ring finger protein 219                                                             |
| ENSG00000270647 | -1.24 | 7.13  | 9.52467E-08 | 9.30319E-07 | TAF15 RNA polymerase II, TATA box binding protein (TBP)-associated factor, 68kDa    |
| ENSG00000140650 | -1.24 | 4.68  | 1.25964E-05 | 7.44784E-05 | phosphomannomutase 2                                                                |

|                 |       |       |             |             |                                                                                        |
|-----------------|-------|-------|-------------|-------------|----------------------------------------------------------------------------------------|
| ENSG00000106263 | -1.24 | 8.00  | 9.6783E-07  | 7.54816E-06 | eukaryotic translation initiation factor 3, subunit B                                  |
| ENSG00000049449 | -1.25 | 6.24  | 2.15932E-08 | 2.40864E-07 | reticulocalbin 1, EF-hand calcium binding domain                                       |
| ENSG00000066044 | -1.25 | 6.87  | 4.95795E-09 | 6.40193E-08 | ELAV like RNA binding protein 1                                                        |
| ENSG00000165684 | -1.25 | 5.08  | 2.89156E-07 | 2.52517E-06 | small nuclear RNA activating complex, polypeptide 4, 190kDa                            |
| ENSG00000111641 | -1.25 | 5.66  | 2.15273E-08 | 2.40331E-07 | NOP2 nucleolar protein                                                                 |
| ENSG00000143952 | -1.25 | 4.97  | 5.20368E-07 | 4.30634E-06 | vacuolar protein sorting 54 homolog (S. cerevisiae)                                    |
| ENSG00000058600 | -1.25 | 5.24  | 4.01894E-07 | 3.40225E-06 | polymerase (RNA) III (DNA directed) polypeptide E (80kD)                               |
| ENSG00000167113 | -1.25 | 4.74  | 1.41098E-06 | 1.05103E-05 | coenzyme Q4                                                                            |
| ENSG00000264364 | -1.25 | 6.33  | 5.52913E-08 | 5.69384E-07 | dynein, light chain, LC8-type 2                                                        |
| ENSG00000104529 | -1.25 | 7.83  | 1.16135E-08 | 1.38756E-07 | eukaryotic translation elongation factor 1 delta (guanine nucleotide exchange protein) |
| ENSG00000165874 | -1.25 | 5.72  | 8.92377E-07 | 7.02575E-06 | family with sequence similarity 35, member B, pseudogene                               |
| ENSG00000165271 | -1.26 | 5.86  | 2.67456E-05 | 0.000145679 | nucleolar protein 6 (RNA-associated)                                                   |
| ENSG00000161618 | -1.26 | 5.73  | 2.05845E-08 | 2.3097E-07  | aldehyde dehydrogenase 16 family, member A1                                            |
| ENSG00000134215 | -1.26 | 4.95  | 3.5154E-07  | 3.01638E-06 | vav 3 guanine nucleotide exchange factor                                               |
| ENSG00000124571 | -1.26 | 6.09  | 2.25934E-07 | 2.03125E-06 | exportin 5                                                                             |
| ENSG00000104907 | -1.26 | 5.89  | 1.1749E-07  | 1.12974E-06 | tRNA methyltransferase 1 homolog (S. cerevisiae)                                       |
| ENSG00000165097 | -1.26 | 5.26  | 1.48145E-07 | 1.39269E-06 | lysine (K)-specific demethylase 1B                                                     |
| ENSG00000107949 | -1.26 | 6.28  | 7.54687E-09 | 9.36235E-08 | BRCA2 and CDKN1A interacting protein                                                   |
| ENSG00000116221 | -1.26 | 6.58  | 4.19577E-08 | 4.4167E-07  | mitochondrial ribosomal protein L37                                                    |
| ENSG00000141759 | -1.26 | 5.69  | 3.69231E-06 | 2.50171E-05 | thioredoxin-like 4A                                                                    |
| ENSG00000090447 | -1.26 | 4.45  | 2.33182E-06 | 1.65522E-05 | transcription factor AP-4 (activating enhancer binding protein 4)                      |
| ENSG00000036549 | -1.26 | 5.62  | 1.85204E-08 | 2.09939E-07 | zinc finger, ZZ-type containing 3                                                      |
| ENSG00000213593 | -1.27 | 6.89  | 1.08957E-08 | 1.31481E-07 | thioredoxin-related transmembrane protein 2                                            |
| ENSG00000204149 | -1.27 | 5.66  | 1.63048E-07 | 1.51774E-06 | ArfGAP with GTPase domain, ankyrin repeat and PH domain 6                              |
| ENSG00000031003 | -1.27 | 5.05  | 2.89907E-07 | 2.53006E-06 | family with sequence similarity 13, member B                                           |
| ENSG00000100522 | -1.27 | 4.48  | 4.62227E-05 | 0.000237446 | glucosamine-phosphate N-acetyltransferase 1                                            |
| ENSG00000167702 | -1.27 | 4.77  | 1.01808E-06 | 7.88265E-06 | kinesin family member C2                                                               |
| ENSG00000095906 | -1.27 | 5.14  | 4.14613E-06 | 2.76701E-05 | nucleotide binding protein 2                                                           |
| ENSG00000028310 | -1.27 | 5.35  | 5.36826E-08 | 5.53677E-07 | bromodomain containing 9                                                               |
| ENSG00000243725 | -1.27 | 4.71  | 1.14959E-06 | 8.73475E-06 | tetratricopeptide repeat domain 4                                                      |
| ENSG00000156697 | -1.27 | 4.50  | 1.13832E-05 | 6.81751E-05 | UTP14, U3 small nucleolar ribonucleoprotein, homolog A (yeast)                         |
| ENSG00000115232 | -1.27 | 7.58  | 1.76033E-09 | 2.47528E-08 | integrin, alpha 4 (antigen CD49D, alpha 4 subunit of VLA-4 receptor)                   |
| ENSG00000087087 | -1.27 | 7.43  | 1.021E-09   | 1.49095E-08 | serrate, RNA effector molecule                                                         |
| ENSG00000086200 | -1.27 | 4.42  | 3.88312E-06 | 2.61382E-05 | importin 11                                                                            |
| ENSG00000188352 | -1.27 | 4.75  | 6.5312E-06  | 4.14413E-05 | focadhesin                                                                             |
| ENSG00000164818 | -1.27 | 5.36  | 6.31134E-08 | 6.42953E-07 | dynein, axonemal, assembly factor 5                                                    |
| ENSG00000134748 | -1.27 | 5.83  | 1.59041E-08 | 1.83253E-07 | pre-mRNA processing factor 38A                                                         |
| ENSG00000138028 | -1.27 | 4.31  | 6.483E-06   | 4.11748E-05 | cell growth regulator with EF-hand domain 1                                            |
| ENSG00000255587 | -1.28 | 5.61  | 1.65964E-08 | 1.90078E-07 | RAB44, member RAS oncogene family                                                      |
| ENSG00000145725 | -1.28 | 6.15  | 4.34072E-09 | 5.67113E-08 | diphosphoinositol pentakisphosphate kinase 2                                           |
| ENSG00000198824 | -1.28 | 6.17  | 4.84261E-09 | 6.26519E-08 | chromosome alignment maintaining phosphoprotein 1                                      |
| ENSG00000152520 | -1.28 | 10.08 | 1.6124E-05  | 9.25757E-05 | PAN3 poly(A) specific ribonuclease subunit                                             |
| ENSG00000206053 | -1.28 | 6.15  | 8.07649E-09 | 9.98022E-08 | hematological and neurological expressed 1-like                                        |
| ENSG00000007376 | -1.28 | 5.03  | 6.96751E-05 | 0.000340651 | RNA pseudouridylate synthase domain containing 1                                       |
| ENSG00000150401 | -1.28 | 4.86  | 6.68016E-07 | 5.42339E-06 | DCN1, defective in cullin neddylation 1, domain containing 2                           |
| ENSG00000087495 | -1.28 | 5.86  | 1.23229E-07 | 1.17934E-06 | phosphatase and actin regulator 3                                                      |
| ENSG00000099899 | -1.28 | 5.04  | 1.32051E-06 | 9.89751E-06 | tRNA methyltransferase 2 homolog A (S. cerevisiae)                                     |
| ENSG00000161036 | -1.28 | 4.55  | 8.93609E-06 | 5.49156E-05 | leucine-rich repeats and WD repeat domain containing 1                                 |
| ENSG00000197006 | -1.28 | 7.26  | 1.51339E-08 | 1.75447E-07 | methyltransferase like 9                                                               |
| ENSG00000142864 | -1.28 | 9.19  | 1.12584E-07 | 1.0845E-06  | SERPINE1 mRNA binding protein 1                                                        |
| ENSG00000187796 | -1.29 | 6.35  | 7.87732E-08 | 7.8797E-07  | caspase recruitment domain family, member 9                                            |
| ENSG00000169957 | -1.29 | 5.11  | 3.38843E-07 | 2.91876E-06 | zinc finger protein 768                                                                |
| ENSG00000198648 | -1.29 | 4.68  | 1.51359E-06 | 1.11743E-05 | serine threonine kinase 39                                                             |
| ENSG00000167700 | -1.29 | 4.42  | 2.64426E-06 | 1.85518E-05 | major facilitator superfamily domain containing 3                                      |
| ENSG00000134684 | -1.29 | 7.79  | 1.69469E-05 | 9.70043E-05 | tyrosyl-tRNA synthetase                                                                |
| ENSG00000007923 | -1.29 | 6.14  | 4.20164E-06 | 2.79421E-05 | DnaJ (Hsp40) homolog, subfamily C, member 11                                           |
| ENSG00000183137 | -1.29 | 4.45  | 3.64452E-05 | 0.000190762 | centrosomal protein 57kDa-like 1                                                       |
| ENSG00000153395 | -1.29 | 6.60  | 1.59177E-08 | 1.83253E-07 | lysophosphatidylcholine acyltransferase 1                                              |
| ENSG00000113368 | -1.30 | 7.83  | 2.20816E-08 | 2.45693E-07 | lamin B1                                                                               |
| ENSG00000151247 | -1.30 | 6.27  | 6.47934E-09 | 8.14458E-08 | eukaryotic translation initiation factor 4E                                            |
| ENSG00000136379 | -1.30 | 4.76  | 4.44844E-06 | 2.93628E-05 | abhydrolase domain containing 17C                                                      |
| ENSG00000092820 | -1.30 | 7.41  | 3.74195E-09 | 4.94235E-08 | ezrin                                                                                  |
| ENSG00000151835 | -1.30 | 5.93  | 2.32753E-08 | 2.58109E-07 | sacsin molecular chaperone                                                             |
| ENSG00000048162 | -1.30 | 5.65  | 2.71437E-08 | 2.96792E-07 | NOP16 nucleolar protein                                                                |
| ENSG00000162402 | -1.30 | 6.03  | 3.41987E-09 | 4.54408E-08 | ubiquitin specific peptidase 24                                                        |
| ENSG00000086475 | -1.30 | 5.02  | 6.48258E-07 | 5.28237E-06 | selenophosphate synthetase 1                                                           |
| ENSG00000188976 | -1.30 | 6.78  | 1.19779E-09 | 1.72446E-08 | NOC2-like nucleolar associated transcriptional repressor                               |
| ENSG00000167792 | -1.30 | 6.88  | 1.0137E-09  | 1.48355E-08 | NADH dehydrogenase (ubiquinone) flavoprotein 1, 51kDa                                  |
| ENSG00000104884 | -1.30 | 5.96  | 8.26021E-09 | 1.01618E-07 | excision repair cross-complementation group 2                                          |
| ENSG00000230903 | -1.30 | 5.11  | 1.72783E-06 | 1.25603E-05 | RPL9P8                                                                                 |
| ENSG00000100890 | -1.30 | 5.76  | 5.63671E-08 | 5.79115E-07 | KIAA0391                                                                               |
| ENSG00000188452 | -1.31 | 6.47  | 2.29983E-09 | 3.15046E-08 | ceramide kinase-like                                                                   |

|                 |       |       |             |             |                                                                                                       |
|-----------------|-------|-------|-------------|-------------|-------------------------------------------------------------------------------------------------------|
| ENSG00000076248 | -1.31 | 4.82  | 1.35353E-05 | 7.92589E-05 | uracil DNA glycosylase                                                                                |
| ENSG00000165661 | -1.31 | 4.87  | 2.81813E-06 | 1.9647E-05  | quiescin Q6 sulfhydryl oxidase 2                                                                      |
| ENSG00000250067 | -1.31 | 6.60  | 2.8501E-06  | 1.9831E-05  | YjeF N-terminal domain containing 3                                                                   |
| ENSG00000131323 | -1.31 | 5.22  | 1.31045E-05 | 7.70941E-05 | TNF receptor-associated factor 3                                                                      |
| ENSG00000070785 | -1.31 | 4.52  | 2.38861E-06 | 1.68675E-05 | eukaryotic translation initiation factor 2B, subunit 3 gamma, 58kDa                                   |
| ENSG00000057757 | -1.31 | 5.37  | 8.08252E-09 | 9.98022E-08 | PITH (C-terminal proteasome-interacting domain of thioredoxin-like) domain containing 1               |
| ENSG00000135316 | -1.31 | 8.20  | 2.58565E-09 | 3.52754E-08 | synaptotagmin binding, cytoplasmic RNA interacting protein                                            |
| ENSG00000122965 | -1.31 | 4.57  | 6.75304E-06 | 4.27263E-05 | RNA binding motif protein 19                                                                          |
| ENSG00000181472 | -1.31 | 4.87  | 2.72142E-06 | 1.90528E-05 | zinc finger and BTB domain containing 2                                                               |
| ENSG00000125485 | -1.31 | 4.50  | 3.76663E-05 | 0.000196457 | DEAD (Asp-Glu-Ala-Asp) box polypeptide 31                                                             |
| ENSG00000135596 | -1.32 | 8.02  | 8.56567E-08 | 8.47249E-07 | microtubule associated monooxygenase, calponin and LIM domain containing 1                            |
| ENSG00000135763 | -1.32 | 4.51  | 1.74427E-05 | 9.94313E-05 | URB2 ribosome biogenesis 2 homolog (S. cerevisiae)                                                    |
| ENSG00000228253 | -1.32 | 9.43  | 0.000255894 | 0.001069167 | MT-ATP8                                                                                               |
| ENSG00000139842 | -1.32 | 7.88  | 1.13566E-09 | 1.64034E-08 | cullin 4A                                                                                             |
| ENSG00000033011 | -1.32 | 4.84  | 7.83738E-07 | 6.26789E-06 | ALG1, chitobiosyldiphosphodolichol beta-mannosyltransferase                                           |
| ENSG00000237550 | -1.32 | 5.14  | 1.37853E-05 | 8.03982E-05 | RPL9P9                                                                                                |
| ENSG00000146540 | -1.33 | 4.93  | 8.36628E-08 | 8.30621E-07 | chromosome 7 open reading frame 50                                                                    |
| ENSG00000099901 | -1.33 | 6.32  | 3.88308E-06 | 2.61382E-05 | RAN binding protein 1                                                                                 |
| ENSG00000107815 | -1.33 | 4.58  | 6.62475E-05 | 0.000326483 | chromosome 10 open reading frame 2                                                                    |
| ENSG00000075702 | -1.33 | 5.54  | 7.6867E-09  | 9.52692E-08 | WD repeat domain 62                                                                                   |
| ENSG00000101220 | -1.33 | 5.25  | 1.57729E-08 | 1.8206E-07  | chromosome 20 open reading frame 27                                                                   |
| ENSG00000112787 | -1.33 | 6.02  | 1.51146E-06 | 1.11648E-05 | fibrosin-like 1                                                                                       |
| ENSG00000122566 | -1.33 | 10.26 | 4.97356E-06 | 3.24258E-05 | heterogeneous nuclear ribonucleoprotein A2/B1                                                         |
| ENSG00000072274 | -1.33 | 8.63  | 4.84055E-05 | 0.000247462 | transferrin receptor                                                                                  |
| ENSG00000148300 | -1.33 | 5.52  | 9.28226E-07 | 7.28208E-06 | REX4 homolog, 3'-5' exonuclease                                                                       |
| ENSG00000099949 | -1.33 | 4.38  | 1.30546E-06 | 9.80126E-06 | leucine-zipper-like transcription regulator 1                                                         |
| ENSG00000174744 | -1.33 | 4.71  | 4.13445E-07 | 3.48765E-06 | breast cancer metastasis suppressor 1                                                                 |
| ENSG00000164163 | -1.33 | 6.63  | 4.28871E-09 | 5.6087E-08  | ATP-binding cassette, sub-family E (OABP), member 1                                                   |
| ENSG00000110042 | -1.33 | 5.52  | 0.000759449 | 0.002775585 | deltex 4, E3 ubiquitin ligase                                                                         |
| ENSG00000138074 | -1.33 | 6.15  | 2.86026E-07 | 2.50113E-06 | solute carrier family 5 (sodium/multivitamin and iodide cotransporter), member 6                      |
| ENSG00000165724 | -1.34 | 5.14  | 2.22896E-06 | 1.58644E-05 | zinc finger, MYND-type containing 19                                                                  |
| ENSG00000136718 | -1.34 | 5.47  | 8.80458E-08 | 8.68291E-07 | IMP4, U3 small nucleolar ribonucleoprotein                                                            |
| ENSG00000197498 | -1.34 | 5.70  | 2.89453E-09 | 3.89675E-08 | ribosome production factor 2 homolog                                                                  |
| ENSG00000154277 | -1.34 | 4.81  | 3.5773E-07  | 3.06356E-06 | ubiquitin carboxyl-terminal esterase L1 (ubiquitin thiolesterase)                                     |
| ENSG00000172232 | -1.34 | 10.12 | 4.33128E-06 | 2.86893E-05 | azurocidin 1                                                                                          |
| ENSG00000177225 | -1.34 | 6.46  | 7.16908E-10 | 1.09006E-08 | Parkinson disease 7 domain containing 1                                                               |
| ENSG00000125910 | -1.34 | 4.26  | 5.97515E-05 | 0.000297502 | sphingosine-1-phosphate receptor 4                                                                    |
| ENSG00000162408 | -1.34 | 5.08  | 3.60141E-08 | 3.85214E-07 | nucleolar protein 9                                                                                   |
| ENSG00000117450 | -1.34 | 8.78  | 1.15643E-08 | 1.38417E-07 | peroxiredoxin 1                                                                                       |
| ENSG00000033050 | -1.34 | 6.34  | 8.9433E-08  | 8.79359E-07 | ATP-binding cassette, sub-family F (GCN20), member 2                                                  |
| ENSG00000142875 | -1.34 | 4.86  | 1.19744E-05 | 7.12773E-05 | protein kinase, cAMP-dependent, catalytic, beta                                                       |
| ENSG00000133422 | -1.34 | 5.32  | 6.96673E-09 | 8.68221E-08 | MORC family CW-type zinc finger 2                                                                     |
| ENSG00000065978 | -1.34 | 10.01 | 1.951E-05   | 0.000109922 | Y box binding protein 1                                                                               |
| ENSG00000168066 | -1.34 | 8.12  | 1.99092E-09 | 2.75574E-08 | splicing factor 1                                                                                     |
| ENSG00000048052 | -1.34 | 4.58  | 2.30348E-05 | 0.000127242 | histone deacetylase 9                                                                                 |
| ENSG00000142409 | -1.35 | 5.11  | 6.43791E-08 | 6.54842E-07 | zinc finger protein 787                                                                               |
| ENSG00000148334 | -1.35 | 4.73  | 8.03587E-06 | 4.99382E-05 | prostaglandin E synthase 2                                                                            |
| ENSG00000163291 | -1.35 | 4.98  | 1.36599E-06 | 1.02153E-05 | progesterone and adiponectin receptor family member III                                               |
| ENSG00000155393 | -1.35 | 4.94  | 4.72362E-08 | 4.92161E-07 | HEAT repeat containing 3                                                                              |
| ENSG00000108106 | -1.35 | 6.82  | 1.98338E-09 | 2.74816E-08 | ubiquitin-conjugating enzyme E2S                                                                      |
| ENSG00000174547 | -1.35 | 5.60  | 3.05736E-08 | 3.31022E-07 | mitochondrial ribosomal protein L11                                                                   |
| ENSG00000144867 | -1.35 | 6.13  | 1.19345E-07 | 1.14464E-06 | signal recognition particle receptor, B subunit                                                       |
| ENSG00000184207 | -1.35 | 5.29  | 8.01346E-07 | 6.39247E-06 | phosphoglycolate phosphatase                                                                          |
| ENSG00000130638 | -1.35 | 6.06  | 4.24564E-09 | 5.55785E-08 | ataxin 10                                                                                             |
| ENSG00000001084 | -1.35 | 4.81  | 1.77387E-07 | 1.63744E-06 | glutamate-cysteine ligase, catalytic subunit                                                          |
| ENSG00000228875 | -1.35 | 7.28  | 4.76626E-10 | 7.46077E-09 | casein kinase 2, beta polypeptide                                                                     |
| ENSG00000104341 | -1.35 | 6.96  | 2.14257E-10 | 3.623E-09   | lysosomal protein transmembrane 4 beta                                                                |
| ENSG00000144354 | -1.35 | 6.60  | 3.57994E-08 | 3.83536E-07 | cell division cycle associated 7                                                                      |
| ENSG00000117419 | -1.35 | 4.25  | 0.000154965 | 0.000690461 | ERI1 exoribonuclease family member 3                                                                  |
| ENSG00000184281 | -1.35 | 4.69  | 2.3944E-07  | 2.13741E-06 | tumor suppressing subtransferable candidate 4                                                         |
| ENSG00000173145 | -1.36 | 4.97  | 2.66198E-07 | 2.34941E-06 | NOC3-like DNA replication regulator                                                                   |
| ENSG00000073060 | -1.36 | 5.52  | 1.11337E-07 | 1.07405E-06 | scavenger receptor class B, member 1                                                                  |
| ENSG00000156502 | -1.36 | 4.99  | 2.98994E-07 | 2.60423E-06 | suppressor of var1, 3-like 1 (S. cerevisiae)                                                          |
| ENSG00000272325 | -1.36 | 7.00  | 7.574E-11   | 1.37159E-09 | nudix (nucleoside diphosphate linked moiety X)-type motif 3                                           |
| ENSG00000096384 | -1.36 | 10.13 | 1.20581E-06 | 9.1254E-06  | heat shock protein 90kDa alpha (cytosolic), class B member 1                                          |
| ENSG00000269713 | -1.36 | 4.35  | 1.10785E-06 | 8.46613E-06 | neuroblastoma breakpoint family, member 9                                                             |
| ENSG00000213339 | -1.36 | 4.73  | 5.96965E-07 | 4.89748E-06 | queuine tRNA-ribosyltransferase 1                                                                     |
| ENSG00000145220 | -1.37 | 5.79  | 1.23018E-09 | 1.76534E-08 | Ly1 antibody reactive                                                                                 |
| ENSG00000006744 | -1.37 | 5.54  | 3.38669E-09 | 4.50571E-08 | elaC ribonuclease Z 2                                                                                 |
| ENSG00000005844 | -1.37 | 8.01  | 1.39754E-06 | 1.04219E-05 | integrin, alpha L (antigen CD11A (p180), lymphocyte function-associated antigen 1; alpha polypeptide) |
| ENSG00000050393 | -1.37 | 4.54  | 7.74291E-07 | 6.20274E-06 | mitochondrial calcium uniporter regulator 1                                                           |

|                 |       |       |             |             |                                                                                       |
|-----------------|-------|-------|-------------|-------------|---------------------------------------------------------------------------------------|
| ENSG00000165138 | -1.37 | 4.55  | 2.00774E-07 | 1.8279E-06  | ankyrin repeat and sterile alpha motif domain containing 6                            |
| ENSG00000105447 | -1.37 | 5.45  | 1.74876E-08 | 1.99596E-07 | glutamate-rich WD repeat containing 1                                                 |
| ENSG00000185198 | -1.38 | 5.06  | 2.77601E-08 | 3.02039E-07 | protease, serine, 57                                                                  |
| ENSG00000135002 | -1.38 | 4.73  | 3.87844E-07 | 3.29804E-06 | riboflavin kinase                                                                     |
| ENSG00000068383 | -1.38 | 4.75  | 8.34015E-08 | 8.29267E-07 | inositol polyphosphate-5-phosphatase, 40kDa                                           |
| ENSG00000149557 | -1.38 | 7.62  | 1.55567E-10 | 2.69231E-09 | fasciculation and elongation protein zeta 1 (zyglin I)                                |
| ENSG00000235569 | -1.38 | 6.19  | 5.21788E-08 | 5.39845E-07 | mutS homolog 5                                                                        |
| ENSG00000124587 | -1.38 | 5.29  | 3.46353E-09 | 4.58831E-08 | peroxisomal biogenesis factor 6                                                       |
| ENSG00000005379 | -1.38 | 8.45  | 2.67721E-08 | 2.93212E-07 | benzodiazepine receptor (peripheral) associated protein 1                             |
| ENSG00000144381 | -1.38 | 9.02  | 5.11403E-09 | 6.54767E-08 | heat shock 60kDa protein 1 (chaperonin)                                               |
| ENSG00000110619 | -1.38 | 6.31  | 0.001596487 | 0.005261116 | cysteinyl-tRNA synthetase                                                             |
| ENSG00000146433 | -1.39 | 5.74  | 3.22542E-10 | 5.23401E-09 | transmembrane protein 181                                                             |
| ENSG00000074071 | -1.39 | 6.25  | 1.37778E-09 | 1.96441E-08 | mitochondrial ribosomal protein S34                                                   |
| ENSG00000124562 | -1.39 | 6.73  | 2.53834E-10 | 4.2223E-09  | small nuclear ribonucleoprotein polypeptide C                                         |
| ENSG00000100401 | -1.39 | 6.60  | 4.32097E-10 | 6.82817E-09 | Ran GTPase activating protein 1                                                       |
| ENSG00000114767 | -1.39 | 5.04  | 4.19495E-06 | 2.79397E-05 | ribosomal RNA processing 9, small subunit (SSU) processome component, homolog (yeast) |
| ENSG00000155229 | -1.39 | 5.84  | 1.91761E-09 | 2.67658E-08 | MMS19 homolog, cytosolic iron-sulfur assembly component                               |
| ENSG00000228300 | -1.39 | 5.53  | 6.12234E-08 | 6.27068E-07 | chromosome 19 open reading frame 24                                                   |
| ENSG00000122025 | -1.39 | 10.59 | 1.48548E-06 | 1.09974E-05 | fms-related tyrosine kinase 3                                                         |
| ENSG00000140750 | -1.39 | 6.05  | 2.47433E-10 | 4.12616E-09 | Rho GTPase activating protein 17                                                      |
| ENSG00000047188 | -1.39 | 4.72  | 4.8449E-07  | 4.03458E-06 | YTH domain containing 2                                                               |
| ENSG00000176022 | -1.39 | 5.00  | 1.68396E-06 | 1.22886E-05 | UDP-Gal:betaGal beta 1,3-galactosyltransferase polypeptide 6                          |
| ENSG00000164164 | -1.40 | 6.02  | 1.07763E-09 | 1.56333E-08 | OTU deubiquitinase 4                                                                  |
| ENSG00000121716 | -1.40 | 6.23  | 1.61537E-08 | 1.85648E-07 | paired immunoglobulin-like type 2 receptor beta                                       |
| ENSG00000111666 | -1.40 | 4.65  | 1.17966E-07 | 1.13305E-06 | choline phosphotransferase 1                                                          |
| ENSG00000113013 | -1.40 | 8.02  | 5.68548E-11 | 1.04528E-09 | heat shock 70kDa protein 9 (mortalin)                                                 |
| ENSG00000136261 | -1.40 | 6.52  | 1.94283E-09 | 2.70327E-08 | basic leucine zipper and W2 domains 2                                                 |
| ENSG00000106211 | -1.40 | 7.69  | 4.75576E-10 | 7.45526E-09 | heat shock 27kDa protein 1                                                            |
| ENSG00000160208 | -1.40 | 6.88  | 2.35408E-11 | 4.68486E-10 | ribosomal RNA processing 1B                                                           |
| ENSG00000204839 | -1.40 | 4.38  | 4.13557E-07 | 3.48765E-06 | maestro heat-like repeat family member 6                                              |
| ENSG00000179051 | -1.40 | 8.48  | 7.54388E-10 | 1.14312E-08 | regulator of chromosome condensation 2                                                |
| ENSG00000163811 | -1.40 | 6.38  | 1.53329E-10 | 2.66399E-09 | WD repeat domain 43                                                                   |
| ENSG00000077232 | -1.40 | 6.14  | 2.01064E-09 | 2.78013E-08 | DnaJ (Hsp40) homolog, subfamily C, member 10                                          |
| ENSG00000163362 | -1.41 | 6.11  | 2.50341E-10 | 4.16942E-09 | chromosome 1 open reading frame 106                                                   |
| ENSG00000184110 | -1.41 | 6.70  | 3.85535E-08 | 4.0908E-07  | eukaryotic translation initiation factor 3, subunit C                                 |
| ENSG00000170144 | -1.41 | 9.24  | 3.17704E-08 | 3.42027E-07 | heterogeneous nuclear ribonucleoprotein A3                                            |
| ENSG00000169714 | -1.41 | 8.17  | 3.16932E-10 | 5.16191E-09 | CCHC-type zinc finger, nucleic acid binding protein                                   |
| ENSG00000169683 | -1.41 | 5.58  | 3.50414E-09 | 4.63749E-08 | leucine rich repeat containing 45                                                     |
| ENSG00000188807 | -1.41 | 4.74  | 2.2661E-05  | 0.000125576 | transmembrane protein 201                                                             |
| ENSG00000181666 | -1.41 | 4.70  | 2.1854E-07  | 1.9734E-06  | HKR1, GLI-Kruppel zinc finger family member                                           |
| ENSG00000105281 | -1.41 | 7.80  | 3.20848E-09 | 4.28753E-08 | solute carrier family 1 (neutral amino acid transporter), member 5                    |
| ENSG00000184220 | -1.41 | 4.43  | 1.74256E-07 | 1.61415E-06 | cms1 ribosomal small subunit homolog (yeast)                                          |
| ENSG00000148362 | -1.41 | 5.16  | 2.59427E-08 | 2.85069E-07 | chromosome 9 open reading frame 142                                                   |
| ENSG00000198786 | -1.42 | 10.71 | 0.000390991 | 0.001545107 | mitochondrially encoded NADH dehydrogenase 5                                          |
| ENSG00000148824 | -1.42 | 4.91  | 4.17719E-05 | 0.000216509 | mitochondrial ribosome-associated GTPase 1                                            |
| ENSG00000152620 | -1.42 | 4.41  | 1.38401E-07 | 1.3085E-06  | NAD kinase 2, mitochondrial                                                           |
| ENSG00000175857 | -1.42 | 5.23  | 1.47481E-09 | 2.09376E-08 | GRB2-binding adaptor protein, transmembrane                                           |
| ENSG00000131778 | -1.42 | 6.41  | 6.50402E-11 | 1.18754E-09 | chromodomain helicase DNA binding protein 1-like                                      |
| ENSG00000158715 | -1.43 | 4.37  | 3.25353E-05 | 0.000173026 | solute carrier family 45, member 3                                                    |
| ENSG00000140691 | -1.44 | 4.98  | 1.18806E-06 | 9.00644E-06 | armadillo repeat containing 5                                                         |
| ENSG00000068654 | -1.44 | 6.19  | 9.55243E-10 | 1.41201E-08 | polymerase (RNA) I polypeptide A, 194kDa                                              |
| ENSG00000181029 | -1.44 | 4.27  | 4.42154E-06 | 2.92143E-05 | trafficking protein particle complex 5                                                |
| ENSG00000074582 | -1.44 | 5.00  | 7.14202E-09 | 8.88502E-08 | BC1 (ubiquinol-cytochrome c reductase) synthesis-like                                 |
| ENSG00000120053 | -1.44 | 4.50  | 4.67098E-06 | 3.05883E-05 | glutamic-oxaloacetic transaminase 1, soluble                                          |
| ENSG00000101255 | -1.45 | 5.97  | 0.000120793 | 0.000553088 | tribbles pseudokinase 3                                                               |
| ENSG00000108963 | -1.45 | 4.22  | 3.48672E-07 | 2.99758E-06 | diphthamide biosynthesis 1                                                            |
| ENSG00000198868 | -1.45 | 12.76 | 0.000469497 | 0.001811657 | MT-ND4                                                                                |
| ENSG00000101444 | -1.45 | 6.52  | 5.37625E-06 | 3.48289E-05 | adenosylhomocysteinase                                                                |
| ENSG00000140743 | -1.45 | 4.56  | 7.49479E-08 | 7.54252E-07 | cerebellar degeneration-related protein 2, 62kDa                                      |
| ENSG00000160957 | -1.45 | 6.27  | 6.01629E-11 | 1.10304E-09 | RecQ protein-like 4                                                                   |
| ENSG00000142686 | -1.45 | 5.26  | 1.36288E-09 | 1.94735E-08 | chromosome 1 open reading frame 216                                                   |
| ENSG00000214753 | -1.45 | 6.58  | 1.30905E-10 | 2.29541E-09 | heterogeneous nuclear ribonucleoprotein U-like 2                                      |
| ENSG00000104835 | -1.45 | 4.49  | 9.5972E-08  | 9.36715E-07 | seryl-tRNA synthetase 2, mitochondrial                                                |
| ENSG00000167685 | -1.45 | 4.67  | 4.39938E-08 | 4.62004E-07 | zinc finger protein 444                                                               |
| ENSG00000198945 | -1.45 | 4.76  | 7.58709E-08 | 7.62962E-07 | [(3)mbt-like 3 (Drosophila)                                                           |
| ENSG00000130713 | -1.46 | 5.54  | 4.59502E-10 | 7.24398E-09 | exosome component 2                                                                   |
| ENSG00000009830 | -1.46 | 4.44  | 1.02766E-07 | 9.94976E-07 | protein-O-mannosyltransferase 2                                                       |
| ENSG00000149150 | -1.46 | 6.03  | 3.54419E-11 | 6.79849E-10 | solute carrier family 43 (amino acid system L transporter), member 1                  |
| ENSG00000084774 | -1.46 | 6.83  | 1.7832E-09  | 2.50478E-08 | carbamoyl-phosphate synthetase 2, aspartate transcarbamylase, and dihydroorotase      |
| ENSG00000270629 | -1.46 | 4.87  | 1.76662E-08 | 2.00943E-07 | neuroblastoma breakpoint family, member 14                                            |
| ENSG00000205560 | -1.46 | 5.30  | 7.75795E-08 | 7.78375E-07 | carnitine palmitoyltransferase 1B (muscle)                                            |
| ENSG00000148843 | -1.46 | 6.36  | 3.01589E-09 | 4.04782E-08 | programmed cell death 11                                                              |

|                 |       |       |             |             |                                                                     |
|-----------------|-------|-------|-------------|-------------|---------------------------------------------------------------------|
| ENSG00000178718 | -1.46 | 4.39  | 4.78226E-06 | 3.12554E-05 | ribonuclease P/MRP 25kDa subunit                                    |
| ENSG00000130826 | -1.46 | 7.26  | 1.1267E-12  | 2.75938E-11 | dyskeratosis congenita 1, dyskerin                                  |
| ENSG00000132361 | -1.46 | 6.33  | 6.94684E-08 | 7.03911E-07 | clustered mitochondria (cluA/CLU1) homolog                          |
| ENSG00000214160 | -1.46 | 5.36  | 1.8949E-07  | 1.73469E-06 | ALG3, alpha-1,3- mannosyltransferase                                |
| ENSG00000128973 | -1.47 | 5.93  | 4.54498E-10 | 7.17362E-09 | ceroid-lipofuscinosis, neuronal 6, late infantile, variant          |
| ENSG00000214706 | -1.47 | 6.16  | 3.17182E-08 | 3.41743E-07 | interferon-related developmental regulator 2                        |
| ENSG00000137168 | -1.47 | 5.68  | 3.95955E-11 | 7.50843E-10 | peptidylprolyl isomerase (cyclophilin)-like 1                       |
| ENSG00000125257 | -1.47 | 4.93  | 1.7613E-06  | 1.27892E-05 | ATP-binding cassette, sub-family C (CFTR/MRP), member 4             |
| ENSG00000082516 | -1.47 | 4.58  | 4.20134E-06 | 2.79421E-05 | gem (nuclear organelle) associated protein 5                        |
| ENSG00000130726 | -1.47 | 8.44  | 2.06677E-10 | 3.51722E-09 | tripartite motif containing 28                                      |
| ENSG00000123545 | -1.48 | 4.94  | 6.29185E-08 | 6.41459E-07 | NADH dehydrogenase (ubiquinone) complex I, assembly factor 4        |
| ENSG00000135521 | -1.48 | 6.54  | 2.30981E-10 | 3.87616E-09 | LTV1 ribosome biogenesis factor                                     |
| ENSG00000215041 | -1.48 | 4.63  | 3.70714E-08 | 3.9525E-07  | neutralized E3 ubiquitin protein ligase 4                           |
| ENSG00000065150 | -1.48 | 7.46  | 7.11138E-12 | 1.55002E-10 | importin 5                                                          |
| ENSG00000143643 | -1.48 | 4.70  | 1.76955E-08 | 2.01104E-07 | tetratricopeptide repeat domain 13                                  |
| ENSG00000134905 | -1.48 | 6.40  | 1.04758E-11 | 2.21935E-10 | cysteinyl-tRNA synthetase 2, mitochondrial (putative)               |
| ENSG00000185504 | -1.48 | 6.34  | 3.56876E-11 | 6.8259E-10  | Fanconi anemia core complex associated protein 100                  |
| ENSG00000110090 | -1.49 | 5.93  | 1.8574E-06  | 1.34068E-05 | carnitine palmitoyltransferase 1A (liver)                           |
| ENSG00000196535 | -1.49 | 6.54  | 4.3739E-09  | 5.70886E-08 | myosin XVIIIa                                                       |
| ENSG00000144136 | -1.49 | 6.77  | 6.61661E-10 | 1.01536E-08 | solute carrier family 20 (phosphate transporter), member 1          |
| ENSG00000124541 | -1.49 | 5.45  | 6.90309E-11 | 1.25523E-09 | ribosomal RNA processing 36                                         |
| ENSG00000075407 | -1.49 | 6.35  | 1.63039E-06 | 1.19568E-05 | zinc finger protein 37A                                             |
| ENSG00000241978 | -1.49 | 5.81  | 8.95214E-10 | 1.32772E-08 | A kinase (PRKA) anchor protein 2                                    |
| ENSG00000142185 | -1.49 | 7.37  | 5.21656E-13 | 1.33419E-11 | transient receptor potential cation channel, subfamily M, member 2  |
| ENSG00000273645 | -1.50 | 5.67  | 3.3876E-09  | 4.50571E-08 | kelch repeat and BTB (POZ) domain containing 11                     |
| ENSG00000100219 | -1.50 | 7.50  | 6.31863E-08 | 6.43201E-07 | X-box binding protein 1                                             |
| ENSG00000112159 | -1.50 | 6.29  | 2.22768E-11 | 4.46006E-10 | midasin AAA ATPase 1                                                |
| ENSG00000178921 | -1.50 | 4.84  | 2.01904E-07 | 1.83566E-06 | phosphoribosylformylglycinamide synthase                            |
| ENSG00000108179 | -1.50 | 7.16  | 2.31802E-11 | 4.62003E-10 | peptidylprolyl isomerase F                                          |
| ENSG00000197150 | -1.50 | 4.28  | 2.56103E-07 | 2.27088E-06 | ATP-binding cassette, sub-family B (MDR/TAP), member 8              |
| ENSG00000106105 | -1.50 | 7.32  | 3.90757E-05 | 0.000203328 | glycyl-tRNA synthetase                                              |
| ENSG00000185238 | -1.50 | 4.47  | 9.8263E-08  | 9.56965E-07 | protein arginine methyltransferase 3                                |
| ENSG00000085511 | -1.51 | 4.85  | 1.90884E-09 | 2.66715E-08 | mitogen-activated protein kinase kinase kinase 4                    |
| ENSG00000163393 | -1.51 | 6.03  | 4.30866E-11 | 8.10101E-10 | solute carrier family 22, member 15                                 |
| ENSG00000149136 | -1.51 | 7.74  | 4.4128E-11  | 8.27338E-10 | structure specific recognition protein 1                            |
| ENSG00000112578 | -1.51 | 5.09  | 7.67573E-10 | 1.15913E-08 | bystin-like                                                         |
| ENSG00000274679 | -1.52 | 4.63  | 1.11423E-08 | 1.34213E-07 | spermatogenesis and centriole associated 1-like                     |
| ENSG00000132305 | -1.52 | 6.79  | 7.38404E-13 | 1.84587E-11 | inner membrane protein, mitochondrial                               |
| ENSG00000116922 | -1.52 | 4.41  | 1.95712E-07 | 1.78426E-06 | chromosome 1 open reading frame 109                                 |
| ENSG00000164934 | -1.52 | 6.07  | 1.4867E-11  | 3.04544E-10 | DDB1 and CUL4 associated factor 13                                  |
| ENSG00000071655 | -1.52 | 6.98  | 2.61832E-12 | 6.00268E-11 | methyl-CpG binding domain protein 3                                 |
| ENSG00000165209 | -1.52 | 5.28  | 5.80707E-10 | 9.00503E-09 | spermatid perinuclear RNA binding protein                           |
| ENSG00000166123 | -1.52 | 5.58  | 3.27968E-05 | 0.000174208 | glutamic pyruvate transaminase (alanine aminotransferase) 2         |
| ENSG00000167962 | -1.53 | 6.22  | 1.24519E-11 | 2.59476E-10 | zinc finger protein 598                                             |
| ENSG00000179271 | -1.53 | 5.45  | 3.27941E-10 | 5.30864E-09 | growth arrest and DNA-damage-inducible, gamma interacting protein 1 |
| ENSG00000268006 | -1.53 | 4.46  | 1.77222E-07 | 2.01236E-07 | PTOV1 antisense RNA 1                                               |
| ENSG00000185760 | -1.54 | 5.03  | 7.93798E-10 | 1.19466E-08 | potassium channel, voltage gated KQT-like subfamily Q, member 5     |
| ENSG00000230606 | -1.54 | 4.47  | 1.50544E-05 | 8.68834E-05 | AC159540.1                                                          |
| ENSG00000247077 | -1.54 | 5.57  | 2.56103E-11 | 5.04379E-10 | phosphoglycerate mutase family member 5                             |
| ENSG00000197728 | -1.54 | 6.33  | 2.65041E-11 | 5.19668E-10 | ribosomal protein S26                                               |
| ENSG00000140263 | -1.54 | 5.80  | 1.50244E-10 | 2.61382E-09 | sorbitol dehydrogenase                                              |
| ENSG00000171262 | -1.55 | 5.17  | 2.63291E-10 | 4.3632E-09  | family with sequence similarity 98, member B                        |
| ENSG00000277804 | -1.55 | 6.09  | 1.17138E-11 | 2.46807E-10 | proteinase 3                                                        |
| ENSG00000198727 | -1.55 | 10.97 | 1.08125E-05 | 6.5091E-05  | mitochondrially encoded cytochrome b                                |
| ENSG00000109917 | -1.55 | 5.78  | 4.87869E-12 | 1.08294E-10 | ZPR1 zinc finger                                                    |
| ENSG00000007392 | -1.56 | 5.26  | 2.6217E-11  | 5.148E-10   | LUC7-like                                                           |
| ENSG00000130725 | -1.56 | 6.41  | 2.46719E-11 | 4.8807E-10  | ubiquitin-conjugating enzyme E2M                                    |
| ENSG00000112651 | -1.56 | 4.84  | 5.45511E-09 | 6.93594E-08 | mitochondrial ribosomal protein L2                                  |
| ENSG00000166197 | -1.56 | 7.42  | 3.44869E-11 | 6.6441E-10  | nucleolar and coiled-body phosphoprotein 1                          |
| ENSG00000108561 | -1.56 | 6.22  | 1.85E-10    | 3.17221E-09 | complement component 1, q subcomponent binding protein              |
| ENSG00000103876 | -1.56 | 5.75  | 1.7296E-11  | 3.51588E-10 | fumarylacetoacetate hydrolase (fumarylacetoacetase)                 |
| ENSG00000178605 | -1.56 | 4.52  | 3.52859E-08 | 3.78646E-07 | GTP binding protein 6 (putative)                                    |
| ENSG00000162129 | -1.56 | 4.90  | 5.05991E-09 | 6.50077E-08 | CipB homolog, mitochondrial AAAATPase chaperonin                    |
| ENSG00000224078 | -1.57 | 4.96  | 7.83898E-07 | 6.26789E-06 | small nucleolar RNA host gene 14                                    |
| ENSG00000204316 | -1.57 | 5.84  | 1.95367E-11 | 3.93521E-10 | mitochondrial ribosomal protein L38                                 |
| ENSG00000146830 | -1.57 | 6.96  | 8.37875E-12 | 1.80551E-10 | GRB10 interacting GYF protein 1                                     |
| ENSG00000255302 | -1.57 | 4.38  | 2.94773E-07 | 2.56915E-06 | EP300 interacting inhibitor of differentiation 1                    |
| ENSG00000226950 | -1.57 | 4.69  | 6.62072E-09 | 8.28308E-08 | differentiation antagonizing non-protein coding RNA                 |
| ENSG00000145703 | -1.58 | 5.06  | 1.85876E-08 | 2.10522E-07 | IQ motif containing GTPase activating protein 2                     |
| ENSG00000244165 | -1.58 | 4.22  | 3.64822E-08 | 3.89907E-07 | purinergic receptor P2Y, G-protein coupled, 11                      |
| ENSG00000132382 | -1.59 | 5.79  | 2.76691E-10 | 4.55681E-09 | MYB binding protein (P160) 1a                                       |
| ENSG00000096063 | -1.59 | 6.86  | 1.30933E-12 | 3.16576E-11 | SRSF protein kinase 1                                               |

|                 |       |      |             |             |                                                                                                  |
|-----------------|-------|------|-------------|-------------|--------------------------------------------------------------------------------------------------|
| ENSG00000161547 | -1.59 | 8.56 | 1.65239E-12 | 3.90978E-11 | serine/arginine-rich splicing factor 2                                                           |
| ENSG00000131828 | -1.59 | 6.06 | 2.02914E-12 | 4.73371E-11 | pyruvate dehydrogenase (lipoamide) alpha 1                                                       |
| ENSG00000142102 | -1.59 | 4.74 | 8.94646E-10 | 1.32772E-08 | ATH1, acid trehalase-like 1 (yeast)                                                              |
| ENSG00000196510 | -1.59 | 5.41 | 2.89169E-12 | 6.56142E-11 | anaphase promoting complex subunit 7                                                             |
| ENSG00000140006 | -1.59 | 4.33 | 9.55205E-09 | 1.16432E-07 | WD repeat domain 89                                                                              |
| ENSG00000165526 | -1.60 | 5.00 | 7.79643E-10 | 1.17469E-08 | RNA pseudouridylate synthase domain containing 4                                                 |
| ENSG00000184575 | -1.60 | 7.72 | 5.09164E-13 | 1.30476E-11 | exportin, tRNA                                                                                   |
| ENSG00000183010 | -1.60 | 6.52 | 5.82202E-13 | 1.47766E-11 | pyrroline-5-carboxylate reductase 1                                                              |
| ENSG00000117174 | -1.60 | 4.38 | 1.66986E-08 | 1.91084E-07 | zinc finger, HIT-type containing 6                                                               |
| ENSG00000143093 | -1.61 | 4.92 | 1.29975E-10 | 2.28581E-09 | striatin interacting protein 1                                                                   |
| ENSG00000058804 | -1.61 | 6.03 | 2.90801E-13 | 7.79817E-12 | NDC1 transmembrane nucleoporin                                                                   |
| ENSG00000155846 | -1.62 | 4.35 | 9.27819E-08 | 9.0892E-07  | peroxisome proliferator-activated receptor gamma, coactivator 1 beta                             |
| ENSG00000138095 | -1.62 | 7.52 | 4.89134E-14 | 1.46233E-12 | leucine-rich pentatricopeptide repeat containing                                                 |
| ENSG00000133265 | -1.62 | 5.01 | 5.11849E-11 | 9.46279E-10 | HSPA (heat shock 70kDa) binding protein, cytoplasmic cochaperone 1                               |
| ENSG00000223705 | -1.63 | 5.64 | 1.1443E-12  | 2.79732E-11 | NOP2/Sun domain family, member 5 pseudogene 1                                                    |
| ENSG00000126602 | -1.63 | 6.55 | 4.9289E-11  | 9.13774E-10 | TNF receptor-associated protein 1                                                                |
| ENSG00000123064 | -1.64 | 6.18 | 5.29988E-13 | 1.3529E-11  | DEAD (Asp-Glu-Ala-Asp) box polypeptide 54                                                        |
| ENSG00000070061 | -1.64 | 5.56 | 1.08712E-12 | 2.67229E-11 | inhibitor of kappa light polypeptide gene enhancer in B-cells, kinase complex-associated protein |
| ENSG00000137309 | -1.64 | 8.08 | 5.25754E-12 | 1.15928E-10 | high mobility group AT-hook 1                                                                    |
| ENSG00000197785 | -1.64 | 6.19 | 1.38926E-08 | 1.63195E-07 | ATPase family, AAA domain containing 3A                                                          |
| ENSG00000106344 | -1.65 | 5.62 | 6.69346E-13 | 1.67956E-11 | RNA binding motif protein 28                                                                     |
| ENSG00000254870 | -1.65 | 5.83 | 3.45899E-09 | 4.58688E-08 | ATP6V1G2-DDX39B readthrough (NMD candidate)                                                      |
| ENSG00000118513 | -1.65 | 8.85 | 2.12662E-10 | 3.60521E-09 | v-myb avian myeloblastosis viral oncogene homolog                                                |
| ENSG00000171163 | -1.65 | 6.31 | 7.85887E-14 | 2.2678E-12  | zinc finger protein 692                                                                          |
| ENSG00000131368 | -1.65 | 5.87 | 3.92405E-10 | 6.26056E-09 | mitochondrial ribosomal protein S25                                                              |
| ENSG00000184232 | -1.66 | 5.66 | 5.90065E-10 | 9.13567E-09 | out at first homolog                                                                             |
| ENSG00000017483 | -1.66 | 5.46 | 7.62537E-13 | 1.90262E-11 | solute carrier family 38, member 5                                                               |
| ENSG00000125901 | -1.67 | 4.38 | 2.66855E-08 | 2.92747E-07 | mitochondrial ribosomal protein S26                                                              |
| ENSG00000140044 | -1.67 | 5.10 | 0.001895411 | 0.006096362 | Jun dimerization protein 2                                                                       |
| ENSG00000184787 | -1.67 | 7.99 | 7.78092E-15 | 2.55653E-13 | ubiquitin-conjugating enzyme E2G 2                                                               |
| ENSG00000175602 | -1.67 | 5.26 | 9.67736E-10 | 1.4273E-08  | coiled-coil domain containing 85B                                                                |
| ENSG00000139514 | -1.68 | 7.61 | 1.67429E-13 | 4.6301E-12  | solute carrier family 7 (cationic amino acid transporter, y+ system), member 1                   |
| ENSG00000128272 | -1.69 | 7.88 | 0.00012075  | 0.000553083 | activating transcription factor 4                                                                |
| ENSG00000272752 | -1.70 | 5.23 | 3.89464E-10 | 6.22111E-09 | STAG3L5P-PVRIG2P-PILRB readthrough                                                               |
| ENSG00000107937 | -1.70 | 5.65 | 5.98758E-13 | 1.51678E-11 | GTP binding protein 4                                                                            |
| ENSG00000180730 | -1.70 | 5.02 | 6.49162E-09 | 8.1523E-08  | shisa family member 2                                                                            |
| ENSG00000065183 | -1.70 | 5.71 | 3.83593E-13 | 1.01229E-11 | WD repeat domain 3                                                                               |
| ENSG00000177192 | -1.70 | 5.62 | 4.4186E-13  | 1.14811E-11 | pseudouridylate synthase 1                                                                       |
| ENSG00000090273 | -1.70 | 6.65 | 1.13214E-13 | 3.20427E-12 | nudC nuclear distribution protein                                                                |
| ENSG00000115053 | -1.71 | 9.73 | 1.30012E-10 | 2.28581E-09 | nucleolin                                                                                        |
| ENSG00000167635 | -1.71 | 6.05 | 2.26761E-13 | 6.19346E-12 | zinc finger protein 146                                                                          |
| ENSG00000227686 | -1.71 | 7.19 | 3.99795E-16 | 1.49069E-14 | valyl-tRNA synthetase                                                                            |
| ENSG00000115652 | -1.72 | 5.86 | 1.26388E-07 | 1.20523E-06 | UDP-glucuronate decarboxylase 1                                                                  |
| ENSG00000104635 | -1.72 | 5.69 | 7.10447E-14 | 2.0772E-12  | solute carrier family 39 (zinc transporter), member 14                                           |
| ENSG00000135972 | -1.72 | 4.48 | 5.11522E-09 | 6.54767E-08 | mitochondrial ribosomal protein S9                                                               |
| ENSG00000160256 | -1.72 | 4.75 | 2.06999E-10 | 3.51819E-09 | family with sequence similarity 207, member A                                                    |
| ENSG00000167114 | -1.72 | 4.75 | 9.46815E-07 | 7.40603E-06 | solute carrier family 27 (fatty acid transporter), member 4                                      |
| ENSG00000261236 | -1.72 | 6.33 | 1.55232E-12 | 3.69938E-11 | block of proliferation 1                                                                         |
| ENSG00000182168 | -1.73 | 5.91 | 5.80655E-09 | 7.35459E-08 | unc-5 netrin receptor C                                                                          |
| ENSG00000183889 | -1.73 | 5.01 | 3.81776E-06 | 2.57766E-05 | Protein LOC102724993                                                                             |
| ENSG00000171793 | -1.73 | 6.31 | 7.30486E-09 | 9.0706E-08  | CTP synthase 1                                                                                   |
| ENSG00000053372 | -1.73 | 6.31 | 1.22875E-14 | 3.95885E-13 | MRT4 homolog, ribosome maturation factor                                                         |
| ENSG00000140284 | -1.73 | 5.09 | 1.86316E-09 | 2.61157E-08 | solute carrier family 27 (fatty acid transporter), member 2                                      |
| ENSG00000080608 | -1.73 | 5.65 | 5.90508E-10 | 9.13567E-09 | KIAA0020                                                                                         |
| ENSG00000091127 | -1.73 | 4.55 | 8.20727E-09 | 1.01061E-07 | pseudouridylate synthase 7 (putative)                                                            |
| ENSG00000136444 | -1.74 | 5.28 | 4.02615E-13 | 1.05828E-11 | radical S-adenosyl methionine domain containing 1                                                |
| ENSG00000165689 | -1.75 | 6.15 | 2.8164E-12  | 6.42352E-11 | serologically defined colon cancer antigen 3                                                     |
| ENSG00000108578 | -1.75 | 5.31 | 2.92976E-13 | 7.84065E-12 | bleomycin hydrolase                                                                              |
| ENSG00000117528 | -1.76 | 5.89 | 8.05625E-15 | 2.63396E-13 | ATP-binding cassette, sub-family D (ALD), member 3                                               |
| ENSG00000188933 | -1.78 | 4.44 | 0.000122213 | 0.000559012 | ubiquitin specific peptidase 32 pseudogene 1                                                     |
| ENSG00000160214 | -1.78 | 6.16 | 1.10066E-13 | 3.12852E-12 | ribosomal RNA processing 1                                                                       |
| ENSG00000110104 | -1.78 | 5.30 | 1.60795E-11 | 3.27864E-10 | coiled-coil domain containing 86                                                                 |
| ENSG00000127586 | -1.78 | 5.42 | 7.64222E-14 | 8.45784E-13 | chromosome transmission fidelity factor 18                                                       |
| ENSG00000007520 | -1.78 | 4.23 | 1.68802E-09 | 2.38116E-08 | TSR3, 20S rRNA accumulation, homolog (S. cerevisiae)                                             |
| ENSG00000125459 | -1.79 | 4.95 | 5.46042E-11 | 1.00529E-09 | misato 1, mitochondrial distribution and morphology regulator                                    |
| ENSG00000189007 | -1.79 | 5.50 | 9.62149E-15 | 3.12263E-13 | adenosine deaminase, tRNA-specific 2                                                             |
| ENSG00000063241 | -1.79 | 4.60 | 1.73957E-10 | 2.99884E-09 | isochorismatase domain containing 2                                                              |
| ENSG00000179041 | -1.80 | 5.09 | 9.75803E-13 | 2.41207E-11 | ribosome biogenesis regulator homolog                                                            |
| ENSG00000169230 | -1.80 | 6.60 | 2.43054E-15 | 8.46851E-14 | PREL1 domain containing 1                                                                        |
| ENSG00000180900 | -1.82 | 6.70 | 8.77998E-17 | 3.61942E-15 | scribbled planar cell polarity protein                                                           |
| ENSG00000213066 | -1.82 | 5.04 | 3.03962E-13 | 8.10199E-12 | FGFR1 oncogene partner                                                                           |
| ENSG00000152642 | -1.82 | 4.69 | 2.46582E-08 | 2.7208E-07  | glycerol-3-phosphate dehydrogenase 1-like                                                        |



|                 |       |       |             |             |                                                                                        |
|-----------------|-------|-------|-------------|-------------|----------------------------------------------------------------------------------------|
| ENSG00000134987 | -1.82 | 6.15  | 1.27074E-11 | 2.63972E-10 | WD repeat domain 36                                                                    |
| ENSG00000167965 | -1.82 | 5.60  | 8.1276E-09  | 1.00173E-07 | MTOR associated protein, LST8 homolog                                                  |
| ENSG00000115758 | -1.82 | 6.64  | 1.34883E-12 | 3.25533E-11 | ornithine decarboxylase 1                                                              |
| ENSG00000071994 | -1.82 | 6.23  | 4.41093E-16 | 1.63094E-14 | programmed cell death 2                                                                |
| ENSG00000100427 | -1.82 | 5.48  | 5.2312E-10  | 8.15969E-09 | megalencephalic leukoencephalopathy with subcortical cysts 1                           |
| ENSG00000182676 | -1.83 | 9.40  | 1.50295E-12 | 3.60112E-11 | protein phosphatase 1, regulatory subunit 27                                           |
| ENSG00000253729 | -1.83 | 8.36  | 2.71232E-16 | 1.04357E-14 | protein kinase, DNA-activated, catalytic polypeptide                                   |
| ENSG00000106133 | -1.84 | 4.25  | 8.70001E-11 | 1.56907E-09 | NOP2/Sun domain family, member 5 pseudogene 2                                          |
| ENSG00000232169 | -1.84 | 7.07  | 1.68841E-17 | 7.57162E-16 | ATP-binding cassette, sub-family F (GCN20), member 1                                   |
| ENSG00000068831 | -1.84 | 7.15  | 1.46968E-16 | 5.91167E-15 | RAS guanyl releasing protein 2 (calcium and DAG-regulated)                             |
| ENSG00000168924 | -1.84 | 6.09  | 5.52022E-16 | 2.02979E-14 | leucine zipper-EF-hand containing transmembrane protein 1                              |
| ENSG00000162676 | -1.85 | 7.16  | 2.76593E-18 | 1.37509E-16 | growth factor independent 1 transcription repressor                                    |
| ENSG00000196449 | -1.85 | 4.76  | 2.82703E-12 | 6.43671E-11 | lyrC N(6)-threonylcarbamoyltransferase domain containing                               |
| ENSG00000170571 | -1.85 | 6.83  | 1.70658E-17 | 7.62731E-16 | embigin                                                                                |
| ENSG00000004478 | -1.85 | 6.35  | 5.98416E-14 | 1.76519E-12 | FK506 binding protein 4, 59kDa                                                         |
| ENSG00000141569 | -1.86 | 6.09  | 1.97254E-13 | 5.4098E-12  | tripartite motif containing 65                                                         |
| ENSG00000007541 | -1.86 | 4.66  | 1.0468E-10  | 1.86513E-09 | phosphatidylinositol glycan anchor biosynthesis, class Q                               |
| ENSG00000188206 | -1.86 | 7.50  | 2.84997E-13 | 7.658E-12   | HNRNPU antisense RNA 1                                                                 |
| ENSG00000123213 | -1.87 | 4.66  | 1.24863E-11 | 2.59786E-10 | neurolysin (metallopeptidase M3 family)                                                |
| ENSG00000060982 | -1.87 | 6.01  | 3.34247E-10 | 5.40414E-09 | branched chain amino-acid transaminase 1, cytosolic                                    |
| ENSG00000120254 | -1.87 | 5.18  | 1.23539E-12 | 3.00892E-11 | methylenetetrahydrofolate dehydrogenase (NADP+ dependent) 1-like                       |
| ENSG00000196305 | -1.89 | 7.47  | 3.4994E-17  | 1.50327E-15 | isoleucyl-tRNA synthetase                                                              |
| ENSG00000103253 | -1.89 | 4.38  | 4.75037E-09 | 6.15987E-08 | hydroxyacylglutathione hydrolase-like                                                  |
| ENSG00000171791 | -1.89 | 5.21  | 2.12398E-15 | 7.45866E-14 | B-cell CLL/lymphoma 2                                                                  |
| ENSG00000105677 | -1.90 | 5.52  | 1.71774E-16 | 6.82674E-15 | transmembrane protein 147                                                              |
| ENSG00000178105 | -1.90 | 4.81  | 1.59279E-12 | 3.78223E-11 | DEAD (Asp-Glu-Ala-Asp) box polypeptide 10                                              |
| ENSG00000132768 | -1.91 | 4.92  | 5.49441E-10 | 8.55016E-09 | DPH2 homolog                                                                           |
| ENSG00000133706 | -1.91 | 7.15  | 6.50062E-19 | 3.42418E-17 | leucyl-tRNA synthetase                                                                 |
| ENSG00000116649 | -1.92 | 6.97  | 9.08931E-19 | 4.73143E-17 | spermidine synthase                                                                    |
| ENSG00000171492 | -1.92 | 6.29  | 1.67344E-12 | 3.95255E-11 | leucine rich repeat containing 8 family, member D                                      |
| ENSG00000120438 | -1.92 | 8.18  | 7.86178E-17 | 3.27139E-15 | t-complex 1                                                                            |
| ENSG00000183426 | -1.94 | 6.27  | 2.25241E-14 | 7.01841E-13 | nuclear pore complex interacting protein family, member A1                             |
| ENSG00000172366 | -1.95 | 4.24  | 6.18571E-08 | 6.31608E-07 | family with sequence similarity 195, member A                                          |
| ENSG00000183048 | -1.96 | 5.30  | 3.4332E-16  | 1.2924E-14  | solute carrier family 25 (mitochondrial carrier; dicarboxylate transporter), member 10 |
| ENSG00000144485 | -1.97 | 5.68  | 5.40617E-14 | 1.6054E-12  | hes family bHLH transcription factor 6                                                 |
| ENSG00000282283 | -1.97 | 7.47  | 3.24063E-11 | 6.26144E-10 | LPPR3                                                                                  |
| ENSG00000083097 | -1.97 | 4.93  | 6.10674E-13 | 1.54402E-11 | dopey family member 1                                                                  |
| ENSG00000146457 | -1.97 | 5.02  | 2.89901E-14 | 8.90776E-13 | Wilms tumor 1 associated protein                                                       |
| ENSG00000132780 | -1.98 | 7.71  | 3.85763E-20 | 2.31535E-18 | nuclear autoantigenic sperm protein (histone-binding)                                  |
| ENSG00000198744 | -1.98 | 12.21 | 1.31581E-06 | 9.8678E-06  | MT-CO3                                                                                 |
| ENSG00000114631 | -1.98 | 5.23  | 6.46925E-09 | 8.13961E-08 | podocalyxin-like 2                                                                     |
| ENSG00000196497 | -1.99 | 5.92  | 5.97727E-10 | 9.22585E-09 | importin 4                                                                             |
| ENSG00000172179 | -2.01 | 5.85  | 4.18167E-10 | 6.61592E-09 | prolactin                                                                              |
| ENSG00000102241 | -2.03 | 5.94  | 2.1421E-17  | 9.5098E-16  | HIV-1 Tat specific factor 1                                                            |
| ENSG00000175416 | -2.03 | 4.95  | 3.08604E-15 | 1.06124E-13 | clathrin, light chain B                                                                |
| ENSG00000070081 | -2.03 | 8.80  | 1.2584E-17  | 5.77993E-16 | nucleobindin 2                                                                         |
| ENSG00000198520 | -2.05 | 6.95  | 1.46919E-17 | 6.70173E-16 | chromosome 1 open reading frame 228                                                    |
| ENSG00000113575 | -2.08 | 6.51  | 1.93878E-20 | 1.20259E-18 | protein phosphatase 2, catalytic subunit, alpha isozyme                                |
| ENSG00000135069 | -2.08 | 6.80  | 2.39815E-08 | 2.65054E-07 | phosphoserine aminotransferase 1                                                       |
| ENSG00000124802 | -2.09 | 5.78  | 3.07361E-19 | 1.67209E-17 | eukaryotic translation elongation factor 1 epsilon 1                                   |
| ENSG00000099624 | -2.09 | 6.12  | 6.4182E-18  | 2.99983E-16 | ATP synthase, H+ transporting, mitochondrial F1 complex, delta subunit                 |
| ENSG00000087269 | -2.09 | 6.46  | 6.71609E-20 | 3.96219E-18 | NOP14 nucleolar protein                                                                |
| ENSG00000185163 | -2.10 | 4.99  | 2.82451E-16 | 1.07737E-14 | DEAD (Asp-Glu-Ala-Asp) box polypeptide 51                                              |
| ENSG00000221823 | -2.10 | 5.90  | 6.25141E-16 | 2.2797E-14  | protein phosphatase 3, regulatory subunit B, alpha                                     |
| ENSG00000155380 | -2.11 | 6.22  | 7.09988E-21 | 4.57494E-19 | solute carrier family 16 (monocarboxylate transporter), member 1                       |
| ENSG00000235173 | -2.11 | 4.92  | 1.59785E-14 | 5.06202E-13 | HGH1 homolog                                                                           |
| ENSG00000198763 | -2.11 | 11.15 | 5.00774E-09 | 6.44116E-08 | mitochondrially encoded NADH dehydrogenase 2                                           |
| ENSG00000103266 | -2.11 | 6.11  | 2.57342E-18 | 1.28904E-16 | STIP1 homology and U-box containing protein 1, E3 ubiquitin protein ligase             |
| ENSG00000282367 | -2.12 | 4.93  | 3.27219E-14 | 9.98508E-13 | phosphatidylserine synthase 2                                                          |
| ENSG00000116455 | -2.12 | 5.36  | 5.17386E-17 | 2.17335E-15 | WD repeat domain 77                                                                    |
| ENSG00000179862 | -2.15 | 4.52  | 1.01083E-12 | 2.48939E-11 | Cbp/p300-interacting transactivator, with Glu/Asp-rich carboxy-terminal domain, 4      |
| ENSG00000139675 | -2.17 | 5.35  | 5.00746E-13 | 1.28567E-11 | heterogeneous nuclear ribonucleoprotein A1-like 2                                      |
| ENSG00000243716 | -2.18 | 6.51  | 1.07676E-15 | 3.85254E-14 | nuclear pore complex interacting protein family, member B5                             |
| ENSG00000183751 | -2.19 | 5.08  | 2.29098E-13 | 6.24444E-12 | transducin (beta)-like 3                                                               |
| ENSG00000114446 | -2.20 | 5.56  | 2.53116E-20 | 1.54122E-18 | intraflagellar transport 57                                                            |
| ENSG00000183605 | -2.21 | 5.00  | 3.50111E-13 | 9.2762E-12  | sideroflexin 4                                                                         |
| ENSG00000103342 | -2.26 | 6.84  | 2.61855E-16 | 1.01043E-14 | G1 to S phase transition 1                                                             |
| ENSG00000198899 | -2.26 | 11.63 | 1.49454E-08 | 1.73718E-07 | mitochondrially encoded ATP synthase 6                                                 |
| ENSG00000120738 | -2.28 | 6.61  | 2.60779E-17 | 1.14622E-15 | early growth response 1                                                                |
| ENSG00000007264 | -2.29 | 4.54  | 1.2058E-11  | 2.52458E-10 | megakaryocyte-associated tyrosine kinase                                               |
| ENSG00000226916 | -2.33 | 5.80  | 4.60489E-19 | 2.45483E-17 | WD repeat domain 46                                                                    |
| ENSG00000174669 | -2.33 | 5.15  | 1.50345E-21 | 1.0182E-19  | solute carrier family 29 (equilibrative nucleoside transporter), member 2              |

|                 |       |      |             |             |                                                                        |
|-----------------|-------|------|-------------|-------------|------------------------------------------------------------------------|
| ENSG00000183688 | -2.36 | 7.05 | 6.09326E-18 | 2.85802E-16 | family with sequence similarity 101, member B                          |
| ENSG00000116852 | -2.36 | 4.67 | 2.12237E-10 | 3.60261E-09 | kinesin family member 21B                                              |
| ENSG00000074935 | -2.39 | 4.40 | 8.0411E-06  | 4.99474E-05 | tubulin, epsilon 1                                                     |
| ENSG00000160072 | -2.41 | 5.74 | 3.36921E-18 | 1.64423E-16 | ATPase family, AAA domain containing 3B                                |
| ENSG00000224877 | -2.45 | 4.67 | 7.9127E-14  | 2.27838E-12 | chromosome 17 open reading frame 89                                    |
| ENSG00000110660 | -2.45 | 5.14 | 1.18364E-21 | 8.18314E-20 | solute carrier family 35, member F2                                    |
| ENSG00000011052 | -2.45 | 5.30 | 3.35185E-21 | 2.23581E-19 | NME/NM23 nucleoside diphosphate kinase 2                               |
| ENSG00000070669 | -2.45 | 5.53 | 1.58819E-08 | 1.83159E-07 | asparagine synthetase (glutamine-hydrolyzing)                          |
| ENSG00000277957 | -2.46 | 6.62 | 1.19734E-08 | 1.42696E-07 | SEN3-EIF4A1 readthrough (NMD candidate)                                |
| ENSG00000106070 | -2.46 | 5.15 | 5.75921E-20 | 3.41285E-18 | growth factor receptor-bound protein 10                                |
| ENSG00000262814 | -2.54 | 5.57 | 1.7156E-23  | 1.47875E-21 | mitochondrial ribosomal protein L12                                    |
| ENSG00000175445 | -2.60 | 5.23 | 3.88344E-05 | 0.000202264 | lipoprotein lipase                                                     |
| ENSG00000160818 | -2.67 | 5.60 | 5.14005E-28 | 5.98501E-26 | G patch domain containing 4                                            |
| ENSG00000164284 | -2.72 | 4.53 | 2.55435E-07 | 2.26647E-06 | GrpE-like 2, mitochondrial (E. coli)                                   |
| ENSG00000052749 | -2.74 | 5.30 | 8.42927E-22 | 5.88896E-20 | ribosomal RNA processing 12 homolog                                    |
| ENSG00000106588 | -2.77 | 5.08 | 3.70105E-05 | 0.000193264 | proteasome (prosome, macropain) subunit, alpha type, 2                 |
| ENSG00000169246 | -3.18 | 6.11 | 1.17126E-22 | 9.0391E-21  | nuclear pore complex interacting protein family, member B3             |
| ENSG00000169136 | -3.29 | 6.03 | 2.19389E-12 | 5.09121E-11 | activating transcription factor 5                                      |
| ENSG00000176076 | -3.41 | 4.80 | 6.66331E-28 | 7.6912E-26  | potassium channel, voltage gated subfamily E regulatory beta subunit 5 |
| ENSG00000239672 | -4.00 | 6.13 | 4.18997E-45 | 1.11235E-42 | NME/NM23 nucleoside diphosphate kinase 1                               |
| ENSG00000128965 | -4.85 | 4.55 | 0.000222143 | 0.000944803 | ChaC glutathione-specific gamma-glutamylcyclotransferase 1             |

**Supplementary Table S5A: Differential expression analysis of *T. gondii* genes from MM6 cells infected with *T. gondii* EGS strain for 18 hours compared to *T. gondii* gene expression from MM6 cells infected with GT1 strain for 18 hours.**

| gene ID       | logFC<br>(EGS/GT1) | logCPM | PValue   | FDR      | Product Name                                             |
|---------------|--------------------|--------|----------|----------|----------------------------------------------------------|
| TGME49_232955 | 8.01               | 8.96   | 1.23E-54 | 9.09E-51 | hypothetical protein                                     |
| TGME49_323400 | 7.44               | 9.09   | 3.98E-42 | 1.47E-38 | cytochrome c oxidase subunit iii subfamily protein       |
| TGME49_322200 | 7.72               | 6.25   | 3.10E-41 | 7.66E-38 | apocytochrome b, putative                                |
| TGME49_206550 | 4.89               | 5.45   | 6.10E-28 | 1.13E-24 | hypothetical protein                                     |
| TGME49_330000 | 8.23               | 9.81   | 2.24E-26 | 3.32E-23 | cytochrome b                                             |
| TGME49_237130 | 8.00               | 9.77   | 7.17E-24 | 8.86E-21 | cytochrome b, putative                                   |
| TGME49_255060 | 6.97               | 9.39   | 1.12E-23 | 1.19E-20 | cytochrome b(N-terminal)/b6/petB subfamily protein       |
| TGME49_252065 | 3.93               | 5.35   | 3.54E-16 | 3.27E-13 | KRUF family protein                                      |
| TGME49_305460 | 2.60               | 7.39   | 2.57E-15 | 2.12E-12 | methionine aminopeptidase 2, putative                    |
| TGME49_301222 | 2.58               | 6.51   | 4.94E-15 | 3.66E-12 | DNA repair protein Rad4 domain-containing protein        |
| TGME49_252220 | 2.24               | 7.62   | 4.27E-14 | 2.87E-11 | tetratricopeptide repeat domain containing protein       |
| TGME49_250670 | 3.64               | 5.81   | 5.48E-14 | 3.38E-11 | hypothetical protein                                     |
| TGME49_302055 | 8.07               | 5.01   | 4.21E-13 | 2.23E-10 | ribosomal protein RPS12                                  |
| TGME49_279340 | 2.25               | 6.65   | 1.99E-12 | 9.83E-10 | hypothetical protein                                     |
| TGME49_252070 | 3.61               | 4.72   | 4.39E-12 | 2.03E-09 | KRUF family protein                                      |
| TGME49_225555 | 1.93               | 8.72   | 7.76E-12 | 3.19E-09 | hypothetical protein                                     |
| TGME49_275860 | 2.23               | 9.13   | 1.90E-11 | 7.40E-09 | hypothetical protein                                     |
| TGME49_217530 | 3.58               | 4.70   | 2.75E-11 | 1.02E-08 | hypothetical protein                                     |
| TGME49_254030 | 1.93               | 8.07   | 2.89E-11 | 1.02E-08 | zinc finger CDGSH-type domain-containing protein         |
| TGME49_253790 | 2.72               | 7.19   | 9.06E-11 | 3.05E-08 | zinc finger (CCCH type) motif-containing protein         |
| TGME49_249230 | 3.23               | 6.21   | 1.99E-10 | 6.41E-08 | hypothetical protein                                     |
| TGME49_260250 | -2.90              | 6.13   | 2.34E-10 | 6.92E-08 | cyclin domain protein, cyclin H family protein           |
| TGME49_294400 | -3.34              | 6.97   | 2.26E-10 | 6.92E-08 | hypothetical protein                                     |
| TGME49_226310 | -2.88              | 7.53   | 3.68E-10 | 1.05E-07 | zinc finger (CCCH type) motif-containing protein         |
| TGME49_233925 | 10.75              | 11.32  | 4.53E-10 | 1.24E-07 | hypothetical protein                                     |
| TGME49_223660 | 1.91               | 7.24   | 1.08E-09 | 2.87E-07 | 50S ribosomal protein L4, putative                       |
| TGME49_235630 | 1.82               | 6.97   | 1.78E-09 | 4.47E-07 | hypothetical protein                                     |
| TGME49_286928 | -3.71              | 6.04   | 1.81E-09 | 4.47E-07 | hypothetical protein                                     |
| TGME49_294980 | 4.14               | 4.97   | 1.87E-09 | 4.47E-07 | hypothetical protein                                     |
| TGME49_273870 | -2.06              | 7.40   | 1.99E-09 | 4.60E-07 | SWI2/SNF2 ISWI-like (AT hook)                            |
| TGME49_260430 | 3.50               | 4.69   | 2.30E-09 | 5.17E-07 | hypothetical protein                                     |
| TGME49_251180 | 2.60               | 5.76   | 4.02E-09 | 8.76E-07 | KRUF family protein                                      |
| TGME49_301250 | 7.47               | 14.41  | 5.72E-09 | 1.21E-06 | hypothetical protein                                     |
| TGME49_299030 | 1.91               | 7.31   | 5.88E-09 | 1.21E-06 | RNA recognition motif 2 protein                          |
| TGME49_285710 | 2.51               | 5.78   | 7.61E-09 | 1.48E-06 | hypothetical protein                                     |
| TGME49_290150 | -2.45              | 6.93   | 7.51E-09 | 1.48E-06 | hypothetical protein                                     |
| TGME49_260480 | 2.83               | 5.50   | 8.95E-09 | 1.70E-06 | leucine rich repeat-containing protein                   |
| TGME49_277270 | 2.73               | 9.46   | 9.50E-09 | 1.76E-06 | NTPase II                                                |
| TGME49_322000 | -2.57              | 6.91   | 1.08E-08 | 1.95E-06 | myosin-light-chain kinase                                |
| TGME49_258390 | 2.65               | 5.51   | 1.41E-08 | 2.49E-06 | DnaJ protein, putative                                   |
| TGME49_266740 | 3.44               | 5.27   | 1.53E-08 | 2.64E-06 | RNA recognition motif-containing protein                 |
| TGME49_300010 | -4.97              | 5.19   | 1.84E-08 | 3.09E-06 | hypothetical protein                                     |
| TGME49_242240 | -3.22              | 5.94   | 1.94E-08 | 3.20E-06 | rhophry kinase family protein ROP19A                     |
| TGME49_207430 | -2.44              | 6.38   | 2.87E-08 | 4.52E-06 | ATP-dependent RNA helicase DDX1, putative                |
| TGME49_253900 | 2.85               | 5.99   | 3.14E-08 | 4.84E-06 | parasite porphobilinogen synthase PBGS                   |
| TGME49_212940 | -8.20              | 6.33   | 4.13E-08 | 6.24E-06 | hypothetical protein                                     |
| TGME49_315885 | 5.95               | 9.43   | 4.84E-08 | 7.17E-06 | glycosyltransferase, putative                            |
| TGME49_251170 | 2.42               | 5.46   | 5.30E-08 | 7.70E-06 | KRUF family protein                                      |
| TGME49_234460 | 2.14               | 6.80   | 5.44E-08 | 7.75E-06 | hypothetical protein                                     |
| TGME49_259950 | 2.03               | 6.67   | 6.86E-08 | 9.59E-06 | carbonate dehydratase, eukaryotic-type domain-containing |
| TGME49_213067 | 1.80               | 7.89   | 7.39E-08 | 1.01E-05 | hypothetical protein                                     |
| TGME49_221320 | 2.55               | 9.10   | 8.61E-08 | 1.16E-05 | acetyl-CoA carboxylase ACC1                              |

|               |       |      |          |            |                                                                  |
|---------------|-------|------|----------|------------|------------------------------------------------------------------|
| TGME49_257350 | 1.55  | 8.19 | 9.06E-08 | 1.20E-05   | eukaryotic translation initiation factor, putative               |
| TGME49_313100 | -3.03 | 5.89 | 9.88E-08 | 1.28E-05   | signal recognition particle SRP54 protein                        |
| TGME49_241155 | 3.09  | 5.87 | 1.02E-07 | 1.30E-05   | hypothetical protein                                             |
| TGME49_215430 | 4.78  | 9.38 | 1.07E-07 | 1.35E-05   | hypothetical protein                                             |
| TGME49_200310 | 1.68  | 7.75 | 1.14E-07 | 1.38E-05   | hypothetical protein                                             |
| TGME49_236270 | -3.59 | 5.33 | 1.13E-07 | 1.38E-05   | hypothetical protein                                             |
| TGME49_275640 | 1.79  | 6.96 | 1.54E-07 | 1.70E-05   | hypothetical protein                                             |
| TGME49_299080 | 1.66  | 6.87 | 1.61E-07 | 1.75E-05   | VTC domain-containing protein                                    |
| TGME49_232600 | 2.23  | 6.53 | 1.89E-07 | 2.03E-05   | phospholipase, patatin family protein                            |
| TGME49_312140 | -4.04 | 8.68 | 2.22E-07 | 2.26E-05   | hypothetical protein                                             |
| TGME49_215930 | -8.19 | 4.44 | 2.21E-07 | 2.26E-05   | mediator complex subunit MED21                                   |
| TGME49_299000 | 2.45  | 6.29 | 2.83E-07 | 2.80E-05   | hypothetical protein                                             |
| TGME49_254710 | 1.72  | 7.19 | 2.87E-07 | 2.80E-05   | serine esterase (DUF676) protein                                 |
| TGME49_247410 | 1.50  | 7.58 | 2.85E-07 | 2.80E-05   | hypothetical protein                                             |
| TGME49_233130 | 3.15  | 5.01 | 3.29E-07 | 3.16E-05   | nucleoside transporter protein                                   |
| TGME49_267020 | -2.38 | 7.23 | 3.35E-07 | 3.18E-05   | hypothetical protein                                             |
| TGME49_253750 | 1.73  | 7.45 | 3.75E-07 | 3.47E-05   | PLU-1 family protein                                             |
| TGME49_227810 | 1.57  | 8.47 | 4.61E-07 | 4.21E-05   | rhoptyr kinase family protein ROP11 (incomplete catalytic triad) |
| TGME49_207960 | -2.40 | 6.09 | 4.69E-07 | 4.24E-05   | hypothetical protein                                             |
| TGME49_272410 | 3.57  | 8.19 | 4.75E-07 | 4.24E-05   | phosphogluconate dehydrogenase (decarboxylating), NAD            |
| TGME49_215940 | -2.46 | 6.61 | 5.07E-07 | 4.47E-05   | Acetyl-coenzyme A transporter, putative                          |
| TGME49_233870 | 1.95  | 6.13 | 5.52E-07 | 4.60E-05   | hypothetical protein                                             |
| TGME49_254690 | 1.57  | 7.81 | 5.52E-07 | 4.60E-05   | phospholipase/carboxylesterase                                   |
| TGME49_217555 | 1.35  | 7.97 | 5.43E-07 | 4.60E-05   | hypothetical protein                                             |
| TGME49_240700 | -2.10 | 6.20 | 5.66E-07 | 4.66E-05   | ubiquitin family protein                                         |
| TGME49_260310 | 2.97  | 4.60 | 7.39E-07 | 6.02E-05   | ATP-binding cassette transporter ABC.B1                          |
| TGME49_258720 | 1.64  | 6.22 | 7.89E-07 | 6.29E-05   | Ubiquitin family protein, putative                               |
| TGME49_301280 | -3.03 | 5.06 | 8.45E-07 | 6.66E-05   | hypothetical protein                                             |
| TGME49_254660 | 1.60  | 6.61 | 8.70E-07 | 6.72E-05   | ankyrin repeat-containing protein                                |
| TGME49_247930 | -3.26 | 5.11 | 8.62E-07 | 6.72E-05   | SNARE domain-containing protein                                  |
| TGME49_268225 | -8.90 | 6.07 | 1.02E-06 | 7.79E-05   | hypothetical protein                                             |
| TGME49_206695 | 3.11  | 4.49 | 1.08E-06 | 8.09E-05   | hypothetical protein                                             |
| TGME49_231370 | 2.43  | 5.17 | 1.08E-06 | 8.09E-05   | phospholipase, patatin family protein                            |
| TGME49_214380 | -2.49 | 5.63 | 1.12E-06 | 8.28E-05   | hypothetical protein                                             |
| TGME49_259010 | -1.97 | 6.56 | 1.17E-06 | 8.57E-05   | vacuolar ATP synthase subunit d, putative                        |
| TGME49_306020 | 2.01  | 5.49 | 1.26E-06 | 9.15E-05   | hypothetical protein                                             |
| TGME49_254080 | 1.47  | 7.77 | 1.28E-06 | 9.20E-05   | metal cation transporter, ZIP family protein                     |
| TGME49_240250 | -1.53 | 7.48 | 1.29E-06 | 9.20E-05   | macro domain-containing protein                                  |
| TGME49_283790 | 3.32  | 5.43 | 1.41E-06 | 9.87E-05   | protein kinase, putative                                         |
| TGME49_293820 | -1.59 | 7.28 | 1.44E-06 | 9.98E-05   | calpain family cysteine protease domain-containing protein       |
| TGME49_258790 | -1.72 | 7.15 | 1.50E-06 | 0.00010279 | zinc finger, C3HC4 type (RING finger) domain-containing protein  |
| TGME49_220240 | 1.59  | 8.76 | 1.69E-06 | 0.00011512 | hypothetical protein                                             |
| TGME49_295935 | 1.50  | 9.03 | 1.76E-06 | 0.00011836 | KRUF family protein                                              |
| TGME49_246490 | -1.55 | 7.85 | 1.78E-06 | 0.00011881 | hypothetical protein                                             |
| TGME49_225930 | 1.29  | 8.16 | 1.84E-06 | 0.00012105 | triose-phosphate isomerase TPI-I                                 |
| TGME49_297495 | -7.98 | 4.96 | 1.85E-06 | 0.00012105 | hypothetical protein                                             |
| TGME49_240510 | 2.77  | 5.61 | 2.04E-06 | 0.00013164 | hypothetical protein                                             |
| TGME49_299210 | 1.86  | 8.19 | 2.04E-06 | 0.00013164 | CTP synthase                                                     |
| TGME49_306895 | 1.69  | 7.00 | 2.06E-06 | 0.00013186 | hypothetical protein                                             |
| TGME49_321540 | -1.74 | 7.23 | 2.12E-06 | 0.00013442 | hypothetical protein                                             |
| TGME49_254770 | 1.45  | 6.49 | 2.16E-06 | 0.00013461 | Ser/Thr phosphatase family protein                               |
| TGME49_290580 | -2.49 | 6.26 | 2.15E-06 | 0.00013461 | ATP-binding cassette G family transporter ABCG89                 |
| TGME49_234640 | -1.84 | 6.39 | 2.31E-06 | 0.0001414  | hypothetical protein                                             |
| TGME49_208440 | 1.33  | 8.08 | 2.33E-06 | 0.00014165 | hypothetical protein                                             |
| TGME49_252310 | 1.63  | 6.62 | 2.43E-06 | 0.00014609 | hypothetical protein                                             |
| TGME49_252360 | 1.57  | 9.12 | 2.47E-06 | 0.00014754 | rhoptyr kinase family protein ROP24 (incomplete catalytic triad) |
| TGME49_254620 | 1.89  | 9.88 | 2.50E-06 | 0.00014819 | ribosomal protein RPL39                                          |

|               |       |       |          |            |                                                                 |
|---------------|-------|-------|----------|------------|-----------------------------------------------------------------|
| TGME49_243410 | -2.01 | 6.18  | 2.55E-06 | 0.0001497  | tetratricopeptide repeat-containing protein                     |
| TGME49_279350 | 2.28  | 5.67  | 2.62E-06 | 0.00015306 | hypothetical protein                                            |
| TGME49_293280 | 2.37  | 5.03  | 2.66E-06 | 0.0001542  | cyclin protein                                                  |
| TGME49_224220 | -1.94 | 6.62  | 2.70E-06 | 0.00015528 | serine/threonine-protein phosphatase PP2A catalytic subunit     |
| TGME49_253470 | 1.39  | 7.33  | 2.80E-06 | 0.00015979 | alveolin domain containing intermediate filament IMC13          |
| TGME49_239270 | -1.71 | 7.52  | 2.98E-06 | 0.00016849 | hypothetical protein                                            |
| TGME49_203540 | 1.80  | 7.63  | 3.19E-06 | 0.00017919 | RNA binding protein, putative                                   |
| TGME49_293430 | 1.38  | 8.30  | 3.24E-06 | 0.00018036 | hypothetical protein                                            |
| TGME49_244370 | 6.17  | 11.45 | 3.35E-06 | 0.00018549 | TDC1, putative                                                  |
| TGME49_219520 | -1.51 | 7.45  | 3.39E-06 | 0.00018629 | histone arginine methyltransferase PRMT1                        |
| TGME49_261750 | -1.75 | 6.89  | 3.55E-06 | 0.00019345 | rhoprtry neck protein RON10                                     |
| TGME49_242340 | 1.66  | 9.48  | 3.74E-06 | 0.00020246 | ribosomal protein RPS29                                         |
| TGME49_285190 | -1.73 | 6.63  | 3.79E-06 | 0.00020349 | zinc finger, C3HC4 type (RING finger) domain-containing protein |
| TGME49_319540 | -2.36 | 5.83  | 3.84E-06 | 0.0002045  | hypothetical protein                                            |
| TGME49_278050 | -1.45 | 8.02  | 3.95E-06 | 0.0002089  | proteasome subunit alpha type 1, putative                       |
| TGME49_247340 | 2.08  | 5.11  | 4.35E-06 | 0.00022713 | hypothetical protein                                            |
| TGME49_320005 | -2.72 | 5.44  | 4.33E-06 | 0.00022713 | hypothetical protein                                            |
| TGME49_305160 | 3.60  | 4.53  | 4.40E-06 | 0.00022771 | histone H2Ba                                                    |
| TGME49_289050 | 2.13  | 7.40  | 4.44E-06 | 0.00022867 | FIKK kinase, putative                                           |
| TGME49_252290 | 1.69  | 6.98  | 4.53E-06 | 0.00023125 | importin alpha, putative                                        |
| TGME49_262010 | 1.74  | 6.19  | 4.56E-06 | 0.00023127 | calmodulin CAM2                                                 |
| TGME49_249770 | 2.68  | 4.97  | 5.01E-06 | 0.00024904 | Nmda1 protein                                                   |
| TGME49_228750 | 2.50  | 5.68  | 5.00E-06 | 0.00024904 | TGME49_228750 CAM kinase, RAD family                            |
| TGME49_277700 | 2.31  | 4.92  | 5.13E-06 | 0.00025165 | ribosomal protein S14 precursor, putative                       |
| TGME49_233500 | 1.50  | 7.35  | 5.10E-06 | 0.00025165 | triose-phosphate isomerase TPI-II                               |
| TGME49_311440 | 1.65  | 6.20  | 5.19E-06 | 0.00025291 | SAG-related sequence SRS50                                      |
| TGME49_308840 | 1.66  | 9.63  | 5.35E-06 | 0.00025737 | SAG-related sequence SRS51                                      |
| TGME49_277710 | -1.81 | 6.74  | 5.32E-06 | 0.00025737 | hypothetical protein                                            |
| TGME49_215390 | 2.51  | 4.45  | 5.47E-06 | 0.00026036 | TIM10 family protein, putative                                  |
| TGME49_215895 | 1.71  | 6.10  | 5.48E-06 | 0.00026036 | AP2 domain-containing protein                                   |
| TGME49_260520 | 1.96  | 6.90  | 5.73E-06 | 0.0002702  | hypothetical protein                                            |
| TGME49_278510 | -1.51 | 8.05  | 5.99E-06 | 0.00028086 | protein phosphatase 2C domain-containing protein                |
| TGME49_252390 | 1.30  | 8.34  | 6.47E-06 | 0.00030075 | hypothetical protein                                            |
| TGME49_312310 | -2.52 | 5.48  | 6.49E-06 | 0.00030075 | ATPase, AAA family protein                                      |
| TGME49_254050 | 1.39  | 6.49  | 6.79E-06 | 0.00031229 | optic atrophy 3 protein (opa3) protein                          |
| TGME49_213280 | 1.45  | 9.22  | 7.06E-06 | 0.00032101 | SAG-related sequence SRS25                                      |
| TGME49_260210 | -2.94 | 5.25  | 7.04E-06 | 0.00032101 | DnaJ domain-containing protein                                  |
| TGME49_246978 | -2.87 | 5.37  | 8.07E-06 | 0.00036442 | hypothetical protein                                            |
| TGME49_279450 | -7.76 | 4.57  | 8.25E-06 | 0.00037046 | adenylosuccinate synthetase, putative                           |
| TGME49_233030 | -1.36 | 8.47  | 8.33E-06 | 0.00037168 | gliding-associated protein GAP70                                |
| TGME49_270530 | -1.63 | 6.58  | 8.57E-06 | 0.00038009 | ubiquitin fusion degradation protein UFD1CY                     |
| TGME49_308090 | 2.51  | 9.77  | 8.67E-06 | 0.00038169 | rhoprtry protein ROP5                                           |
| TGME49_205680 | 1.65  | 7.62  | 8.71E-06 | 0.00038169 | hypothetical protein                                            |
| TGME49_268570 | -1.42 | 7.32  | 9.02E-06 | 0.00039091 | zinc finger (CCCH type) motif-containing protein                |
| TGME49_263270 | -1.53 | 7.37  | 9.01E-06 | 0.00039091 | glycerophosphodiester phosphodiesterase family protein          |
| TGME49_262910 | 2.83  | 4.81  | 9.27E-06 | 0.00039681 | NADH-cytochrome b5 reductase 1, putative                        |
| TGME49_219832 | -2.70 | 5.42  | 9.26E-06 | 0.00039681 | cyclin-dependent kinase regulatory subunit protein              |
| TGME49_217010 | -1.86 | 6.08  | 9.70E-06 | 0.00041299 | hypothetical protein                                            |
| TGME49_312600 | 1.17  | 8.45  | 1.01E-05 | 0.00042687 | heat shock protein HSP21                                        |
| TGME49_249860 | -1.63 | 7.01  | 1.02E-05 | 0.00043038 | hypothetical protein                                            |
| TGME49_223040 | 1.52  | 7.92  | 1.03E-05 | 0.00043061 | hypothetical protein                                            |
| TGME49_275320 | -1.56 | 7.96  | 1.03E-05 | 0.00043061 | penicillin amidase                                              |
| TGME49_255650 | -1.54 | 7.47  | 1.07E-05 | 0.00044089 | DHHC zinc finger domain-containing protein                      |
| TGME49_242110 | -2.88 | 5.29  | 1.08E-05 | 0.00044285 | rhoprtry kinase family protein ROP38                            |
| TGME49_254520 | 1.33  | 7.27  | 1.18E-05 | 0.0004827  | mediator complex subunit MED11                                  |

|               |       |       |          |            |                                                            |
|---------------|-------|-------|----------|------------|------------------------------------------------------------|
| TGME49_266100 | 1.48  | 6.81  | 1.20E-05 | 0.00048446 | rhophtry kinase family protein ROP41                       |
| TGME49_247770 | 1.21  | 7.98  | 1.19E-05 | 0.00048446 | hypothetical protein                                       |
| TGME49_215540 | -8.74 | 4.96  | 1.21E-05 | 0.00048615 | hypothetical protein                                       |
| TGME49_254910 | 2.11  | 5.42  | 1.26E-05 | 0.00050411 | hypothetical protein                                       |
| TGME49_287470 | 2.41  | 4.97  | 1.28E-05 | 0.00050863 | hypothetical protein                                       |
| TGME49_252250 | 2.15  | 5.19  | 1.34E-05 | 0.00052787 | ATPase, AAA family protein                                 |
| TGME49_240520 | 2.21  | 5.27  | 1.35E-05 | 0.00052938 | hypothetical protein                                       |
| TGME49_220400 | 2.00  | 10.26 | 1.43E-05 | 0.00055589 | actin depolymerizing factor ADF                            |
| TGME49_262500 | -1.75 | 7.65  | 1.47E-05 | 0.0005644  | hypothetical protein                                       |
| TGME49_207630 | -3.63 | 4.99  | 1.47E-05 | 0.0005644  | peptidyl-tRNA hydrolase domain-containing protein          |
| TGME49_210430 | -1.34 | 7.63  | 1.53E-05 | 0.00058311 | DnaJ domain-containing protein                             |
| TGME49_290600 | 6.12  | 12.08 | 1.54E-05 | 0.00058622 | succinyl-CoA-synthetase alpha SCSA                         |
| TGME49_211220 | -1.89 | 5.90  | 1.55E-05 | 0.00058636 | hypothetical protein                                       |
| TGME49_286140 | -1.99 | 5.87  | 1.56E-05 | 0.00058636 | hypothetical protein                                       |
| TGME49_268730 | 2.02  | 5.02  | 1.57E-05 | 0.00058932 | glutaredoxin-related protein                               |
| TGME49_311210 | -1.66 | 6.42  | 1.65E-05 | 0.00061299 | hypothetical protein                                       |
| TGME49_284190 | 1.69  | 6.11  | 1.69E-05 | 0.00062421 | pyruvate carboxylase                                       |
| TGME49_200595 | -9.05 | 4.67  | 1.71E-05 | 0.00062899 | hypothetical protein                                       |
| TGME49_271935 | 1.72  | 6.37  | 1.81E-05 | 0.00066234 | hypothetical protein                                       |
| TGME49_261000 | -1.86 | 6.99  | 1.88E-05 | 0.00068266 | MutS domain V domain-containing protein                    |
| TGME49_280518 | -1.51 | 7.81  | 1.92E-05 | 0.00069334 | hypothetical protein                                       |
| TGME49_320110 | 2.87  | 8.51  | 1.94E-05 | 0.0006969  | proliferating cell nuclear antigen PCNA2                   |
| TGME49_209755 | -1.64 | 5.73  | 1.95E-05 | 0.00069769 | hypothetical protein                                       |
| TGME49_286720 | 1.48  | 6.76  | 2.07E-05 | 0.00073232 | heat shock protein HSP28                                   |
| TGME49_321360 | 1.18  | 7.60  | 2.09E-05 | 0.00073655 | clustered-asparagine-rich protein                          |
| TGME49_202540 | -1.37 | 7.57  | 2.17E-05 | 0.00075938 | 3'5'-cyclic nucleotide phosphodiesterase domain-containing |
| TGME49_230490 | -1.72 | 6.28  | 2.22E-05 | 0.00077392 | phosphatidylinositol-4-phosphate 5-kinase                  |
| TGME49_297420 | -2.07 | 5.89  | 2.24E-05 | 0.0007752  | beta-tubulin cofactor D, putative                          |
| TGME49_253290 | 1.20  | 7.51  | 2.28E-05 | 0.00078324 | valyl-tRNA synthetase                                      |
| TGME49_217951 | -1.96 | 6.01  | 2.28E-05 | 0.00078324 | hypothetical protein                                       |
| TGME49_259530 | -1.67 | 6.38  | 2.34E-05 | 0.00079776 | GalNac                                                     |
| TGME49_268620 | -3.08 | 5.03  | 2.40E-05 | 0.00081637 | blood stage antigen 41-3 precursor, putative               |
| TGME49_223150 | -2.63 | 5.54  | 2.57E-05 | 0.00086931 | START domain-containing protein                            |
| TGME49_223840 | 1.73  | 6.63  | 2.61E-05 | 0.00088029 | ATP-citrate lyase, putative                                |
| TGME49_201790 | -1.60 | 6.54  | 2.64E-05 | 0.00088159 | FHA domain-containing protein                              |
| TGME49_237195 | -2.18 | 5.58  | 2.74E-05 | 0.00090962 | hypothetical protein                                       |
| TGME49_252270 | 1.93  | 5.51  | 2.80E-05 | 0.00092612 | L1P family of ribosomal protein                            |
| TGME49_253990 | 1.44  | 6.61  | 2.82E-05 | 0.00092612 | hypothetical protein                                       |
| TGME49_293550 | -1.38 | 7.18  | 2.82E-05 | 0.00092612 | hypothetical protein                                       |
| TGME49_254610 | 1.75  | 5.28  | 2.97E-05 | 0.00096083 | Tim10/DDP family zinc finger superfamily protein           |
| TGME49_254900 | 1.33  | 6.54  | 2.96E-05 | 0.00096083 | proteasome subunit beta type 2, putative                   |
| TGME49_306730 | -3.20 | 5.07  | 2.97E-05 | 0.00096083 | hypothetical protein                                       |
| TGME49_248630 | -1.60 | 6.81  | 3.06E-05 | 0.00098587 | actin-related protein ARP1                                 |
| TGME49_252500 | 1.20  | 7.79  | 3.08E-05 | 0.00098914 | polo kinase                                                |
| TGME49_238073 | -2.22 | 5.29  | 3.12E-05 | 0.00099647 | hypothetical protein                                       |
| TGME49_227330 | 1.71  | 7.01  | 3.15E-05 | 0.00100085 | hypothetical protein                                       |
| TGME49_222900 | 1.37  | 7.03  | 3.17E-05 | 0.00100085 | phosphoserine phosphatase                                  |
| TGME49_205510 | -1.20 | 7.77  | 3.17E-05 | 0.00100085 | nucleolar protein 5, putative                              |
| TGME49_255635 | -4.70 | 5.32  | 3.20E-05 | 0.00100344 | hypothetical protein                                       |
| TGME49_204110 | -2.91 | 5.27  | 3.22E-05 | 0.00100569 | eIF2 kinase IF2K-C                                         |
| TGME49_259115 | -2.00 | 7.48  | 3.46E-05 | 0.00107702 | ABC1 family protein                                        |
| TGME49_321550 | 1.54  | 5.79  | 3.62E-05 | 0.00112303 | hypothetical protein                                       |
| TGME49_213800 | -1.29 | 8.01  | 3.67E-05 | 0.00112788 | protein phosphatase 2b regulatory subunit, putative        |
| TGME49_258030 | -2.43 | 5.92  | 3.67E-05 | 0.00112788 | DNA polymerase                                             |
| TGME49_252190 | 2.13  | 5.74  | 3.72E-05 | 0.00113785 | KRUF family protein                                        |
| TGME49_292200 | -1.23 | 7.70  | 3.80E-05 | 0.00115745 | RNA recognition motif-containing protein                   |

|               |       |      |          |            |                                                                 |
|---------------|-------|------|----------|------------|-----------------------------------------------------------------|
| TGME49_247530 | 1.25  | 8.79 | 3.90E-05 | 0.00117188 | hypothetical protein                                            |
| TGME49_298990 | 1.50  | 5.96 | 4.15E-05 | 0.00123856 | ferredoxin NADP+ oxidoreductase FNR                             |
| TGME49_229440 | -1.85 | 6.25 | 4.19E-05 | 0.0012467  | zinc finger, C3HC4 type (RING finger) domain-containing protein |
| TGME49_293480 | 1.93  | 7.21 | 4.24E-05 | 0.00125452 | MoeA N-terminal region (domain I and II) domain-containing      |
| TGME49_239410 | -1.36 | 7.88 | 4.37E-05 | 0.0012803  | hypothetical protein                                            |
| TGME49_237410 | -1.64 | 6.56 | 4.38E-05 | 0.0012803  | protein phosphatase 2C domain-containing protein                |
| TGME49_257180 | -1.98 | 5.94 | 4.47E-05 | 0.00129844 | RecF/RecN/SMC N terminal domain-containing protein              |
| TGME49_217350 | -2.50 | 5.20 | 4.57E-05 | 0.00132174 | methyltransferase MTA70, putative                               |
| TGME49_230140 | 2.10  | 5.26 | 4.66E-05 | 0.00134276 | vacuolar sorting protein 9 (vps9) domain-containing protein     |
| TGME49_319580 | -2.55 | 5.43 | 4.68E-05 | 0.001345   | hypothetical protein                                            |
| TGME49_281450 | -1.99 | 5.73 | 4.92E-05 | 0.00140719 | cell-cycle-associated protein kinase, putative                  |
| TGME49_203390 | -1.39 | 7.31 | 4.97E-05 | 0.00141688 | CRAL/TRIO domain-containing protein                             |
| TGME49_295950 | 1.65  | 5.58 | 5.03E-05 | 0.00142151 | KRUF family protein                                             |
| TGME49_270580 | 2.21  | 4.80 | 5.06E-05 | 0.00142551 | HECT-domain (ubiquitin-transferase) domain-containing protein   |
| TGME49_243465 | 3.08  | 4.46 | 5.16E-05 | 0.00143746 | hypothetical protein                                            |
| TGME49_253860 | 1.32  | 6.69 | 5.13E-05 | 0.00143746 | Tyrosine kinase-like (TKL) protein                              |
| TGME49_251460 | -1.84 | 6.07 | 5.15E-05 | 0.00143746 | hypothetical protein                                            |
| TGME49_253100 | 1.15  | 7.21 | 5.22E-05 | 0.00144494 | hypothetical protein                                            |
| TGME49_222040 | -2.70 | 5.45 | 5.23E-05 | 0.00144494 | Ran-interacting Mog1 protein                                    |
| TGME49_289310 | -1.53 | 6.48 | 5.42E-05 | 0.00148763 | cullin family protein                                           |
| TGME49_228360 | 1.39  | 7.28 | 5.49E-05 | 0.00150005 | peptidyl-prolyl isomerase FKBP12, putative                      |
| TGME49_201260 | -1.25 | 8.89 | 5.60E-05 | 0.00151997 | sugar transporter ST3                                           |
| TGME49_228630 | -1.29 | 6.96 | 5.62E-05 | 0.00151997 | hypothetical protein                                            |
| TGME49_232960 | -1.48 | 7.01 | 5.61E-05 | 0.00151997 | oxidoreductase, 2OG-Fe(II) oxygenase family protein             |
| TGME49_262825 | 2.05  | 4.65 | 5.72E-05 | 0.00154004 | peptidase family c50 protein                                    |
| TGME49_263060 | 1.64  | 7.25 | 5.98E-05 | 0.00160441 | Proteasome/cyclosome repeat-containing protein                  |
| TGME49_240950 | -3.19 | 5.11 | 6.00E-05 | 0.00160441 | hypothetical protein                                            |
| TGME49_240440 | 1.45  | 5.78 | 6.09E-05 | 0.0016228  | hypothetical protein                                            |
| TGME49_316270 | 1.43  | 6.15 | 6.13E-05 | 0.00162808 | Rab geranylgeranyl transferase type II beta subunit, putative   |
| TGME49_289720 | -1.72 | 6.89 | 6.25E-05 | 0.00164683 | hypothetical protein                                            |
| TGME49_273400 | -2.22 | 5.01 | 6.25E-05 | 0.00164683 | hypothetical protein                                            |
| TGME49_288580 | 2.50  | 4.44 | 6.33E-05 | 0.00165757 | RNA methylase, putative                                         |
| TGME49_287160 | -1.25 | 7.58 | 6.32E-05 | 0.00165757 | internal kinesin motor domain protein                           |
| TGME49_213635 | 2.50  | 5.03 | 6.41E-05 | 0.00167208 | hypothetical protein                                            |
| TGME49_298610 | -1.15 | 7.94 | 6.46E-05 | 0.0016728  | GYF domain-containing protein                                   |
| TGME49_203730 | -2.06 | 5.79 | 6.45E-05 | 0.0016728  | hypothetical protein                                            |
| TGME49_313230 | 2.39  | 9.56 | 6.55E-05 | 0.00169215 | eukaryotic initiation factor-2, alpha subunit                   |
| TGME49_226755 | 1.53  | 6.33 | 6.75E-05 | 0.0017362  | 3'5'-cyclic nucleotide phosphodiesterase domain-containing      |
| TGME49_253600 | 1.77  | 6.44 | 6.97E-05 | 0.0017858  | hypothetical protein                                            |
| TGME49_254630 | 1.34  | 6.41 | 7.09E-05 | 0.00180609 | CMGC kinase                                                     |
| TGME49_309070 | -2.16 | 5.42 | 7.10E-05 | 0.00180609 | hypothetical protein                                            |
| TGME49_233680 | -2.80 | 4.92 | 7.12E-05 | 0.00180609 | nuclear movement family protein                                 |
| TGME49_229470 | -1.47 | 6.59 | 7.39E-05 | 0.00185511 | hypothetical protein                                            |
| TGME49_207180 | 2.21  | 4.68 | 7.45E-05 | 0.0018629  | indole-3-glycerol phosphate synthase domain-containing protein  |
| TGME49_290740 | -2.43 | 5.25 | 7.47E-05 | 0.0018629  | hypothetical protein                                            |
| TGME49_230430 | -2.22 | 5.37 | 7.55E-05 | 0.00187748 | vesicle-associated membrane protein, putative                   |
| TGME49_294060 | 1.52  | 6.68 | 7.60E-05 | 0.00188327 | hypothetical protein                                            |
| TGME49_300980 | 2.31  | 6.38 | 7.63E-05 | 0.00188405 | hypothetical protein                                            |
| TGME49_286510 | 1.70  | 5.67 | 7.76E-05 | 0.00190332 | hypothetical protein                                            |
| TGME49_248130 | -2.53 | 5.04 | 7.75E-05 | 0.00190332 | hypothetical protein                                            |
| TGME49_285470 | 2.15  | 5.47 | 7.89E-05 | 0.00193003 | patched family protein                                          |
| TGME49_283550 | 1.34  | 6.70 | 8.37E-05 | 0.00202647 | hypothetical protein                                            |
| TGME49_300055 | -1.16 | 8.63 | 8.45E-05 | 0.00203886 | hypothetical protein                                            |
| TGME49_297780 | -1.71 | 6.48 | 8.68E-05 | 0.00207456 | ATPase/histidine kinase/DNA gyrase B/HSP90 domain-containing    |
| TGME49_293040 | -1.91 | 6.54 | 8.80E-05 | 0.00208882 | hypothetical protein                                            |
| TGME49_258590 | -2.37 | 5.43 | 8.99E-05 | 0.00212727 | hypothetical protein                                            |
| TGME49_215785 | 2.21  | 9.54 | 9.18E-05 | 0.0021639  | rhoptry protein ROP2A                                           |
| TGME49_214400 | 1.75  | 4.87 | 9.20E-05 | 0.0021639  | hypothetical protein                                            |

|               |       |       |            |            |                                                             |
|---------------|-------|-------|------------|------------|-------------------------------------------------------------|
| TGME49_237290 | -1.50 | 6.65  | 9.23E-05   | 0.0021639  | hypothetical protein                                        |
| TGME49_268810 | -1.75 | 6.39  | 9.49E-05   | 0.0022065  | ck2 beta subunit                                            |
| TGME49_237830 | -1.92 | 5.67  | 9.50E-05   | 0.0022065  | DNA polymerase I domain-containing protein                  |
| TGME49_226380 | 1.18  | 8.18  | 9.53E-05   | 0.00220694 | hypothetical protein                                        |
| TGME49_227335 | 2.40  | 5.11  | 9.70E-05   | 0.00222412 | hypothetical protein                                        |
| TGME49_274070 | -2.79 | 5.15  | 9.69E-05   | 0.00222412 | ThiF family protein                                         |
| TGME49_215400 | -2.20 | 5.40  | 9.82E-05   | 0.00224455 | RNA recognition motif-containing protein                    |
| TGME49_241300 | 1.80  | 6.54  | 0.00010022 | 0.00228465 | hypothetical protein                                        |
| TGME49_253140 | 1.54  | 5.83  | 0.0001029  | 0.0023386  | hypothetical protein                                        |
| TGME49_305990 | 3.44  | 4.61  | 0.00010446 | 0.00236674 | hypothetical protein                                        |
| TGME49_288400 | -1.71 | 6.11  | 0.00010768 | 0.00241755 | LETM1 family protein                                        |
| TGME49_273530 | -2.31 | 5.13  | 0.00010751 | 0.00241755 | flagellar associated protein                                |
| TGME49_277540 | 2.13  | 4.45  | 0.00011213 | 0.00249299 | hypothetical protein                                        |
| TGME49_220500 | -1.33 | 7.82  | 0.00011272 | 0.00249299 | UBX domain-containing protein                               |
| TGME49_225440 | -4.18 | 4.61  | 0.00011257 | 0.00249299 | hypothetical protein                                        |
| TGME49_293840 | 1.98  | 5.98  | 0.00011632 | 0.00255037 | hypothetical protein                                        |
| TGME49_212090 | 1.14  | 6.72  | 0.00011646 | 0.00255037 | hypothetical protein                                        |
| TGME49_244230 | -2.07 | 5.98  | 0.00011621 | 0.00255037 | hypothetical protein                                        |
| TGME49_258410 | 1.26  | 9.04  | 0.00011772 | 0.00256533 | photosensitized INA-labeled protein PHIL1                   |
| TGME49_248160 | -2.51 | 4.95  | 0.00012128 | 0.00262737 | hypothetical protein                                        |
| TGME49_261660 | 1.96  | 5.03  | 0.00012207 | 0.00263668 | hypothetical protein                                        |
| TGME49_241610 | 1.80  | 6.29  | 0.00012295 | 0.00264546 | hypothetical protein                                        |
| TGME49_249390 | -1.14 | 8.70  | 0.00012319 | 0.00264546 | glutamate/leucine/phenylalanine/valine dehydrogenase family |
| TGME49_205330 | 1.10  | 7.80  | 0.00012409 | 0.0026572  | hypothetical protein                                        |
| TGME49_214970 | -1.38 | 8.09  | 0.00012606 | 0.0026916  | DNA replication licensing factor, putative                  |
| TGME49_291930 | 3.85  | 9.99  | 0.00012661 | 0.00269557 | RNA recognition motif-containing protein                    |
| TGME49_309990 | 1.26  | 6.25  | 0.00012806 | 0.00271854 | hypothetical protein                                        |
| TGME49_210380 | -1.30 | 6.94  | 0.00012882 | 0.00272686 | hypothetical protein                                        |
| TGME49_213570 | 4.50  | 11.16 | 0.00012919 | 0.00272706 | hypothetical protein                                        |
| TGME49_221675 | 1.12  | 7.42  | 0.00013215 | 0.00278151 | hypothetical protein                                        |
| TGME49_246530 | 2.25  | 5.05  | 0.00013406 | 0.00281351 | phospholipase D active site domain-containing protein       |
| TGME49_289620 | 1.19  | 8.43  | 0.00013443 | 0.00281351 | cathepsin CPC1                                              |
| TGME49_294890 | -1.47 | 6.50  | 0.00013489 | 0.00281516 | hypothetical protein                                        |
| TGME49_202580 | 2.00  | 6.20  | 0.00013583 | 0.00281888 | ATPase, AAA family protein                                  |
| TGME49_266860 | 1.40  | 7.09  | 0.00013555 | 0.00281888 | BTB/POZ domain-containing protein                           |
| TGME49_312270 | 1.16  | 8.08  | 0.00013814 | 0.00285658 | rhoptry protein ROP13                                       |
| TGME49_266280 | -1.44 | 6.56  | 0.00013841 | 0.00285658 | HEAT repeat-containing protein                              |
| TGME49_218960 | 1.65  | 7.78  | 0.00014012 | 0.00287581 | AP2 domain transcription factor AP2XII-1                    |
| TGME49_263860 | -2.07 | 5.11  | 0.00014061 | 0.00287785 | hypothetical protein                                        |
| TGME49_310130 | -1.62 | 6.23  | 0.00014159 | 0.00288993 | Spc97 / Spc98 family protein                                |
| TGME49_316255 | 1.05  | 7.55  | 0.00014433 | 0.00293772 | hypothetical protein                                        |
| TGME49_254720 | 1.69  | 9.40  | 0.00014684 | 0.00297184 | dense granule protein GRA8                                  |
| TGME49_271930 | -1.06 | 8.48  | 0.00014721 | 0.00297184 | hypothetical protein                                        |
| TGME49_225130 | -2.67 | 5.10  | 0.00014677 | 0.00297184 | hypothetical protein                                        |
| TGME49_301130 | -2.25 | 5.52  | 0.00015178 | 0.00304743 | hypothetical protein                                        |
| TGME49_248400 | 1.31  | 6.18  | 0.0001524  | 0.00305179 | glyoxalase I, putative                                      |
| TGME49_270830 | 1.20  | 7.26  | 0.00015443 | 0.00308407 | small nuclear ribonucleoprotein                             |
| TGME49_221330 | -1.48 | 6.74  | 0.00015494 | 0.00308595 | DNA gyrase/topoisomerase IV, A subunit domain-containing    |
| TGME49_255510 | -1.22 | 7.27  | 0.00015579 | 0.00309455 | ankyrin repeat-containing protein                           |
| TGME49_253780 | 1.32  | 6.63  | 0.00015745 | 0.00311917 | GTP cyclohydrolase I, putative                              |
| TGME49_238240 | 4.88  | 11.68 | 0.0001588  | 0.00313744 | bystin protein                                              |
| TGME49_208910 | -1.58 | 6.43  | 0.0001609  | 0.00317054 | hypothetical protein                                        |
| TGME49_225470 | 1.44  | 5.79  | 0.00016156 | 0.00317497 | peptide methionine sulfoxide reductase                      |
| TGME49_310390 | 1.86  | 6.89  | 0.00016648 | 0.00326315 | hypothetical protein                                        |
| TGME49_279410 | 1.27  | 7.09  | 0.00016722 | 0.00326892 | hypothetical protein                                        |
| TGME49_270550 | 1.65  | 5.47  | 0.00016962 | 0.00329848 | gamma-glutamyl phosphate reductase, putative                |
| TGME49_247590 | 1.92  | 5.01  | 0.00017076 | 0.00330331 | methyltransferase domain-containing protein                 |



|               |       |       |            |            |                                                                |
|---------------|-------|-------|------------|------------|----------------------------------------------------------------|
| TGME49_262880 | 1.76  | 5.55  | 0.00017042 | 0.00330331 | hypothetical protein                                           |
| TGME49_293380 | -2.19 | 5.59  | 0.00017376 | 0.00335252 | histone lysine acetyltransferase HAT1                          |
| TGME49_224520 | -1.10 | 7.89  | 0.00017459 | 0.00335988 | alveolin domain containing intermediate filament IMC8          |
| TGME49_259240 | 4.14  | 11.70 | 0.00017549 | 0.00336838 | ribosomal protein RPS21                                        |
| TGME49_319530 | -1.18 | 8.07  | 0.00017696 | 0.00338776 | splicing factor SF2                                            |
| TGME49_312105 | -2.30 | 6.27  | 0.00017757 | 0.00339073 | hypothetical protein                                           |
| TGME49_289940 | 1.77  | 5.27  | 0.00017975 | 0.00342353 | uroporphyrinogen decarboxylase                                 |
| TGME49_226240 | 1.50  | 5.23  | 0.0001827  | 0.00347079 | bud site selection protein, putative                           |
| TGME49_244380 | 2.38  | 8.24  | 0.00018547 | 0.00350539 | cactin                                                         |
| TGME49_283820 | -2.80 | 4.90  | 0.00018615 | 0.00350931 | glycine cleavage T-protein (aminomethyl transferase) domain-   |
| TGME49_241305 | 1.59  | 6.01  | 0.00018883 | 0.00353294 | hypothetical protein                                           |
| TGME49_296121 | 1.39  | 7.18  | 0.00018847 | 0.00353294 | hypothetical protein                                           |
| TGME49_288890 | 1.67  | 5.64  | 0.00019266 | 0.00358651 | hypothetical protein                                           |
| TGME49_299240 | 1.61  | 5.35  | 0.00019322 | 0.00358791 | hypothetical protein                                           |
| TGME49_255410 | -1.45 | 6.98  | 0.00019633 | 0.00362751 | hypothetical protein                                           |
| TGME49_288000 | 1.31  | 7.03  | 0.0001972  | 0.00363445 | hypothetical protein                                           |
| TGME49_216020 | -1.98 | 5.94  | 0.00019919 | 0.00365885 | peptidase family c78 protein                                   |
| TGME49_220640 | -1.66 | 7.29  | 0.00020186 | 0.00369288 | hypothetical protein                                           |
| TGME49_320050 | 7.35  | 16.23 | 0.00021625 | 0.00392691 | ribosomal protein RPL5                                         |
| TGME49_278800 | -1.23 | 7.30  | 0.00021783 | 0.00394595 | zinc finger protein 36 family 3 protein                        |
| TGME49_298830 | 2.52  | 4.79  | 0.00022148 | 0.00400224 | hypothetical protein                                           |
| TGME49_253330 | 1.55  | 7.81  | 0.00022257 | 0.00401228 | Rhoptry kinase family protein, truncated (incomplete catalytic |
| TGME49_265840 | -1.35 | 6.56  | 0.00022337 | 0.00401601 | hypothetical protein                                           |
| TGME49_297730 | -1.93 | 5.78  | 0.00022386 | 0.00401601 | transcription elongation factor 1, putative                    |
| TGME49_239490 | 1.17  | 8.02  | 0.00022473 | 0.00402174 | dehydrogenase E1 component family protein                      |
| TGME49_226680 | -1.19 | 7.34  | 0.00023    | 0.00410621 | hypothetical protein                                           |
| TGME49_260790 | -1.74 | 5.56  | 0.0002354  | 0.00418251 | RAP domain-containing protein                                  |
| TGME49_283710 | -1.48 | 6.77  | 0.00024452 | 0.00433408 | Longevity-assurance protein (LAG1) domain-containing protein   |
| TGME49_266450 | 1.70  | 5.91  | 0.00024531 | 0.00433776 | lysine decarboxylase family protein                            |
| TGME49_306890 | 2.64  | 4.80  | 0.00024657 | 0.00434957 | hypothetical protein                                           |
| TGME49_250100 | 1.44  | 6.54  | 0.00025068 | 0.00439028 | hypothetical protein                                           |
| TGME49_263710 | -1.52 | 6.20  | 0.00025304 | 0.00441129 | acyl-CoA:cholesterol acyltransferase alpha ACAT1-alpha         |
| TGME49_236050 | -3.84 | 4.86  | 0.00025378 | 0.00441379 | fructose-bisphosphate aldolase, putative                       |
| TGME49_225250 | 1.27  | 5.81  | 0.00025579 | 0.00441765 | LSU ribosomal protein L14P, putative                           |
| TGME49_311920 | -1.24 | 7.15  | 0.00025537 | 0.00441765 | GRAM domain-containing protein                                 |
| TGME49_300240 | -1.77 | 5.46  | 0.00025472 | 0.00441765 | syntaxin 6, n-terminal protein                                 |
| TGME49_203180 | 1.79  | 5.27  | 0.00025727 | 0.00443274 | leucine rich repeat-containing protein                         |
| TGME49_267460 | 2.01  | 4.67  | 0.00026012 | 0.00445353 | AP2 domain transcription factor AP2IX-1                        |
| TGME49_209985 | 1.74  | 5.16  | 0.00025946 | 0.00445353 | cAMP-dependent protein kinase                                  |
| TGME49_295990 | 1.16  | 6.85  | 0.0002603  | 0.00445353 | ubiquitin conjugating enzyme E2, putative                      |
| TGME49_252630 | 1.14  | 8.01  | 0.00026088 | 0.00445353 | hypothetical protein                                           |
| TGME49_209440 | 1.71  | 6.17  | 0.00026233 | 0.00445811 | hypothetical protein                                           |
| TGME49_228160 | 1.14  | 7.00  | 0.00026273 | 0.00445811 | acid phosphatase                                               |
| TGME49_221410 | -1.40 | 6.55  | 0.00026295 | 0.00445811 | actin-like protein ALP4                                        |
| TGME49_214270 | 2.82  | 9.52  | 0.00026521 | 0.00447603 | translation initiation factor IF-2, putative                   |
| TGME49_280700 | -1.43 | 7.01  | 0.00026734 | 0.00450165 | arginine decarboxylase                                         |
| TGME49_204055 | -2.14 | 5.00  | 0.00026814 | 0.00450486 | hypothetical protein                                           |
| TGME49_290670 | 1.08  | 8.78  | 0.00027077 | 0.00453881 | leucyl aminopeptidase LAP                                      |
| TGME49_315620 | -1.29 | 6.98  | 0.00027423 | 0.0045864  | vacuolar ATP synthase subunit C, putative                      |
| TGME49_271270 | 1.10  | 7.35  | 0.0002788  | 0.00465236 | hypothetical protein                                           |
| TGME49_316230 | -1.61 | 5.94  | 0.0002813  | 0.00468346 | SAC1 phosphoinositide phosphatase, putative                    |
| TGME49_252430 | 1.05  | 7.44  | 0.0002845  | 0.00471556 | hypothetical protein                                           |
| TGME49_308010 | -1.98 | 6.49  | 0.00028614 | 0.00473223 | hypothetical protein                                           |
| TGME49_295030 | -1.06 | 8.09  | 0.00029037 | 0.00478077 | hypothetical protein                                           |
| TGME49_289650 | 1.03  | 8.20  | 0.00029167 | 0.00479155 | PEP-carboxykinase I                                            |
| TGME49_233160 | -1.12 | 7.28  | 0.0002956  | 0.00484537 | hypothetical protein                                           |

|               |       |       |            |            |                                                               |
|---------------|-------|-------|------------|------------|---------------------------------------------------------------|
| TGME49_208730 | 0.96  | 8.09  | 0.00029809 | 0.00487545 | microneme protein, putative                                   |
| TGME49_321410 | 2.80  | 8.06  | 0.00029938 | 0.0048857  | hypothetical protein                                          |
| TGME49_315300 | -1.40 | 6.20  | 0.00030653 | 0.00496954 | transcription factor IIB, putative                            |
| TGME49_262120 | -1.16 | 7.22  | 0.00030846 | 0.00498998 | IQ calmodulin-binding motif domain-containing protein         |
| TGME49_289910 | 1.02  | 7.75  | 0.00031333 | 0.00505327 | hypothetical protein                                          |
| TGME49_231960 | -1.88 | 6.35  | 0.00031374 | 0.00505327 | omega secalin, putative                                       |
| TGME49_212210 | 1.36  | 6.79  | 0.00032217 | 0.00516652 | hypothetical protein                                          |
| TGME49_214100 | -1.36 | 7.77  | 0.00032199 | 0.00516652 | hypothetical protein                                          |
| TGME49_314790 | -1.76 | 6.88  | 0.00032407 | 0.00518586 | small nuclear ribonucleoprotein G, putative                   |
| TGME49_293260 | 1.75  | 7.14  | 0.00032615 | 0.00520779 | ATPase/histidine kinase/DNA gyrase B/HSP90 domain-containing  |
| TGME49_269710 | -1.40 | 6.75  | 0.00033646 | 0.00534941 | hypothetical protein                                          |
| TGME49_211440 | -1.48 | 6.23  | 0.00033624 | 0.00534941 | hypothetical protein                                          |
| TGME49_251500 | -1.24 | 7.59  | 0.00034002 | 0.00539438 | eukaryotic initiation factor-3, subunit 3, putative           |
| TGME49_254365 | 1.08  | 7.70  | 0.0003419  | 0.00540118 | phosphatidate cytidyltransferase                              |
| TGME49_246330 | -1.24 | 6.92  | 0.00034164 | 0.00540118 | CRAL/TRIO domain-containing protein                           |
| TGME49_214090 | 1.76  | 7.04  | 0.00034265 | 0.00540148 | signal peptidase                                              |
| TGME49_288040 | -1.30 | 6.46  | 0.00034627 | 0.00544692 | hypothetical protein                                          |
| TGME49_262935 | 2.22  | 4.84  | 0.00034817 | 0.00544949 | hypothetical protein                                          |
| TGME49_239710 | -1.71 | 5.95  | 0.00034791 | 0.00544949 | phosphomannomutase                                            |
| TGME49_267420 | 0.99  | 8.24  | 0.00035022 | 0.00546268 | mago nashi family protein 2, putative                         |
| TGME49_304520 | -1.27 | 6.73  | 0.00035162 | 0.00547301 | hypothetical protein                                          |
| TGME49_202770 | -1.12 | 8.91  | 0.00035311 | 0.00548467 | RNA recognition motif-containing protein                      |
| TGME49_226710 | 0.97  | 8.58  | 0.0003614  | 0.00554371 | hypothetical protein                                          |
| TGME49_321630 | -1.29 | 6.33  | 0.00036105 | 0.00554371 | RNA recognition motif-containing protein                      |
| TGME49_207060 | -1.46 | 8.77  | 0.00035959 | 0.00554371 | ribonucleoside-diphosphate reductase small subunit            |
| TGME49_300285 | -1.55 | 5.96  | 0.00036094 | 0.00554371 | hypothetical protein                                          |
| TGME49_235740 | -1.65 | 5.82  | 0.00035943 | 0.00554371 | hypothetical protein                                          |
| TGME49_249180 | 0.99  | 8.01  | 0.00036305 | 0.00555746 | bifunctional dihydrofolate reductase-thymidylate synthase     |
| TGME49_258490 | -1.76 | 5.25  | 0.00036996 | 0.00565161 | hypothetical protein                                          |
| TGME49_222952 | 2.17  | 5.22  | 0.00038641 | 0.00587864 | phosphohistidine phosphatase                                  |
| TGME49_285230 | -1.63 | 6.69  | 0.00038622 | 0.00587864 | PRP38 family protein                                          |
| TGME49_290310 | -2.41 | 6.02  | 0.00038864 | 0.00590048 | hypothetical protein                                          |
| TGME49_223600 | -1.87 | 5.52  | 0.00039524 | 0.00598841 | hypothetical protein                                          |
| TGME49_213820 | 1.24  | 6.73  | 0.00039811 | 0.00601956 | hypothetical protein                                          |
| TGME49_204270 | -1.57 | 6.40  | 0.00040307 | 0.00608218 | hypothetical protein                                          |
| TGME49_225050 | 1.08  | 7.65  | 0.00040524 | 0.00610251 | adenosylhomocysteinase, putative                              |
| TGME49_263480 | 1.83  | 5.37  | 0.00040763 | 0.00610615 | sodium/hydrogen exchanger 3 protein                           |
| TGME49_265450 | 1.53  | 7.11  | 0.00040787 | 0.00610615 | hexokinase                                                    |
| TGME49_275630 | 1.12  | 7.37  | 0.00040796 | 0.00610615 | HECT-domain (ubiquitin-transferase) domain-containing protein |
| TGME49_237160 | -1.53 | 5.78  | 0.00041754 | 0.00623699 | hypothetical protein                                          |
| TGME49_262780 | -1.49 | 6.39  | 0.00041856 | 0.0062396  | FHA domain-containing protein                                 |
| TGME49_244130 | 1.91  | 5.94  | 0.00042033 | 0.00624092 | hypothetical protein                                          |
| TGME49_265650 | -1.60 | 5.56  | 0.00041967 | 0.00624092 | protein phosphatase 2C domain-containing protein              |
| TGME49_242640 | 1.08  | 6.51  | 0.0004232  | 0.00627094 | hypothetical protein                                          |
| TGME49_208590 | -1.26 | 7.09  | 0.00042612 | 0.00630161 | vacuolar ATP synthase subunit 54kD, putative                  |
| TGME49_305340 | -1.03 | 8.17  | 0.00044081 | 0.00648002 | corepressor complex CRC230                                    |
| TGME49_217780 | 1.70  | 5.16  | 0.00044333 | 0.00650423 | Sec20 protein                                                 |
| TGME49_299250 | 1.42  | 5.36  | 0.00045182 | 0.00661569 | hypothetical protein                                          |
| TGME49_314070 | 1.15  | 6.15  | 0.000459   | 0.00670762 | hypothetical protein                                          |
| TGME49_258740 | -1.51 | 6.23  | 0.00046744 | 0.0068174  | eukaryotic initiation factor-2A, putative                     |
| TGME49_269425 | -1.35 | 7.07  | 0.00047062 | 0.00685029 | hypothetical protein                                          |
| TGME49_231140 | 3.19  | 11.22 | 0.00047452 | 0.00687061 | ribosomal protein RPS25                                       |
| TGME49_305950 | 1.63  | 5.38  | 0.00047425 | 0.00687061 | tetratricopeptide repeat-containing protein                   |
| TGME49_285170 | -3.11 | 4.61  | 0.00047572 | 0.00687061 | methyltransferase small, putative                             |
| TGME49_245460 | 4.21  | 12.61 | 0.00047767 | 0.00688535 | ribosomal protein RPS8                                        |
| TGME49_320620 | 1.73  | 5.12  | 0.0004796  | 0.00689979 | queuine tRNA ribosyl transferase                              |
| TGME49_309580 | -1.39 | 6.11  | 0.00048374 | 0.00694583 | transporter, major facilitator family protein                 |
| TGME49_254950 | 1.60  | 5.04  | 0.00048672 | 0.00697508 | RNA cap guanine-N2 methyltransferase                          |

|               |       |      |            |            |                                                                 |
|---------------|-------|------|------------|------------|-----------------------------------------------------------------|
| TGME49_305080 | 2.30  | 4.81 | 0.00049099 | 0.00702269 | hypothetical protein                                            |
| TGME49_275990 | 1.24  | 6.60 | 0.00049527 | 0.00706887 | hypothetical protein                                            |
| TGME49_268380 | 2.64  | 6.24 | 0.00052    | 0.00739476 | RNA recognition motif-containing protein                        |
| TGME49_300060 | 1.24  | 6.85 | 0.00052358 | 0.00743136 | signal peptidase subunit protein                                |
| TGME49_246080 | -1.16 | 6.89 | 0.00052813 | 0.00748169 | NAD dependent epimerase/dehydratase family protein              |
| TGME49_275430 | -1.69 | 5.84 | 0.00053265 | 0.00753131 | hypothetical protein                                            |
| TGME49_231100 | 1.16  | 6.73 | 0.00053481 | 0.00754744 | hypothetical protein                                            |
| TGME49_237110 | -1.34 | 6.44 | 0.00053862 | 0.00758672 | replication factor C subunit 2, putative                        |
| TGME49_289680 | 1.16  | 7.08 | 0.00054313 | 0.00763581 | Ras-related protein Rab11                                       |
| TGME49_249350 | -1.19 | 7.35 | 0.00054694 | 0.00764583 | esterase/lipase/thioesterase domain-containing protein          |
| TGME49_248900 | -1.98 | 5.41 | 0.00054513 | 0.00764583 | hypothetical protein                                            |
| TGME49_253950 | 1.35  | 5.56 | 0.00054826 | 0.00764878 | protein fam50a, putative                                        |
| TGME49_224060 | 0.99  | 7.95 | 0.00055025 | 0.00764878 | thioredoxin, putative                                           |
| TGME49_216375 | -2.42 | 4.74 | 0.00055157 | 0.00765273 | hypothetical protein                                            |
| TGME49_318370 | 2.04  | 5.00 | 0.00055391 | 0.00767091 | hypothetical protein                                            |
| TGME49_218830 | -2.05 | 5.10 | 0.00057705 | 0.00794673 | hypothetical protein                                            |
| TGME49_215010 | -1.06 | 7.02 | 0.0005828  | 0.00799626 | hypothetical protein                                            |
| TGME49_217360 | -1.96 | 5.84 | 0.00058393 | 0.00799686 | hypothetical protein                                            |
| TGME49_310360 | -1.15 | 7.38 | 0.00059373 | 0.00810117 | hypothetical protein                                            |
| TGME49_218730 | -1.39 | 6.81 | 0.00059296 | 0.00810117 | hypothetical protein                                            |
| TGME49_209945 | 2.28  | 4.49 | 0.0006056  | 0.00823288 | hypothetical protein                                            |
| TGME49_272010 | -1.63 | 6.93 | 0.0006128  | 0.00831541 | Gar1 protein RNA binding region protein                         |
| TGME49_308060 | 1.48  | 6.55 | 0.00061415 | 0.00831855 | hypothetical protein                                            |
| TGME49_260580 | 1.56  | 6.09 | 0.00061937 | 0.00837392 | hypothetical protein                                            |
| TGME49_265440 | -1.26 | 6.82 | 0.00062989 | 0.00846661 | hypothetical protein                                            |
| TGME49_235980 | -1.64 | 5.63 | 0.0006308  | 0.00846661 | ARIADNE family protein                                          |
| TGME49_214170 | -1.70 | 5.90 | 0.0006354  | 0.00851296 | hypothetical protein                                            |
| TGME49_309400 | -1.56 | 6.01 | 0.0006375  | 0.00852568 | RecF/RecN/SMC N terminal domain-containing protein              |
| TGME49_270140 | -1.57 | 5.92 | 0.0006411  | 0.00855835 | splicing factor DIM1, putative                                  |
| TGME49_211250 | -1.10 | 7.63 | 0.00064403 | 0.00856661 | hypothetical protein                                            |
| TGME49_312260 | -1.42 | 5.95 | 0.00064316 | 0.00856661 | hypothetical protein                                            |
| TGME49_321560 | -1.35 | 6.59 | 0.00064707 | 0.00859167 | zinc knuckle domain-containing protein                          |
| TGME49_321640 | -1.69 | 6.04 | 0.00065086 | 0.00862658 | cell division protein CDC48AP                                   |
| TGME49_268170 | -1.89 | 5.31 | 0.00065339 | 0.00864453 | hypothetical protein                                            |
| TGME49_254915 | 3.02  | 4.55 | 0.00066328 | 0.0087442  | hypothetical protein                                            |
| TGME49_255290 | -2.99 | 4.89 | 0.00066673 | 0.00877412 | hypothetical protein                                            |
| TGME49_222370 | 1.40  | 6.71 | 0.00067193 | 0.00882679 | SAG-related sequence SRS13                                      |
| TGME49_215347 | -2.65 | 4.97 | 0.00067394 | 0.00883758 | hypothetical protein                                            |
| TGME49_286480 | 2.29  | 5.39 | 0.0006761  | 0.008839   | hypothetical protein                                            |
| TGME49_217220 | -1.22 | 6.81 | 0.00067716 | 0.008839   | zinc finger, C3HC4 type (RING finger) domain-containing protein |
| TGME49_240060 | 1.23  | 8.72 | 0.00068223 | 0.00888332 | hypothetical protein                                            |
| TGME49_268200 | 1.63  | 7.01 | 0.00069309 | 0.00898336 | RNA recognition motif-containing protein                        |
| TGME49_272640 | -1.40 | 6.48 | 0.00069355 | 0.00898336 | eukaryotic initiation factor-2B, epsilon subunit, putative      |
| TGME49_321570 | 1.11  | 6.61 | 0.00069503 | 0.00898689 | beta-hydroxyacyl-acyl carrier protein dehydratase (FABZ)        |
| TGME49_216040 | -2.01 | 6.31 | 0.00070024 | 0.00903844 | 30S ribosomal protein S15, putative                             |
| TGME49_232050 | -1.13 | 7.68 | 0.00070722 | 0.00909681 | DnaJ domain-containing protein                                  |
| TGME49_228150 | 1.93  | 6.33 | 0.0007139  | 0.00915104 | hypothetical protein                                            |
| TGME49_250955 | 1.98  | 5.63 | 0.00071938 | 0.00920537 | KRUF family protein                                             |
| TGME49_228320 | -3.53 | 4.54 | 0.00072295 | 0.00923509 | hypothetical protein                                            |
| TGME49_264820 | 1.40  | 6.10 | 0.00072852 | 0.00929024 | RbAp48                                                          |
| TGME49_232130 | -1.00 | 8.66 | 0.00073791 | 0.00939371 | hypothetical protein                                            |
| TGME49_290300 | 1.03  | 7.98 | 0.00073961 | 0.00939929 | hypothetical protein                                            |
| TGME49_255340 | -1.52 | 5.95 | 0.00074343 | 0.00943164 | tetratricopeptide repeat-containing protein                     |
| TGME49_207230 | 1.10  | 6.18 | 0.00074805 | 0.00945712 | hypothetical protein                                            |
| TGME49_240740 | -1.49 | 5.71 | 0.00074927 | 0.00945712 | Sec1 family protein                                             |
| TGME49_228300 | -1.88 | 5.32 | 0.00074914 | 0.00945712 | CCDC25 protein                                                  |
| TGME49_215040 | -1.26 | 6.56 | 0.00076411 | 0.00962803 | HEAT repeat-containing protein                                  |

|               |       |      |            |            |                                                              |
|---------------|-------|------|------------|------------|--------------------------------------------------------------|
| TGME49_313590 | -1.70 | 5.92 | 0.00076667 | 0.00964385 | hypothetical protein                                         |
| TGME49_294690 | -1.04 | 7.30 | 0.00076906 | 0.00965761 | rhomboid protease ROM5                                       |
| TGME49_254730 | 1.74  | 4.90 | 0.00077141 | 0.00967069 | POPLD (NUC188) domain-containing protein                     |
| TGME49_289150 | -1.30 | 6.48 | 0.00077623 | 0.00971466 | hypothetical protein                                         |
| TGME49_300048 | 1.09  | 6.93 | 0.00078522 | 0.00981058 | hypothetical protein                                         |
| TGME49_281570 | -1.64 | 5.86 | 0.00079109 | 0.00985069 | hypothetical protein                                         |
| TGME49_290840 | -1.24 | 6.05 | 0.0008008  | 0.00995486 | serine protease                                              |
| TGME49_313180 | -0.96 | 8.51 | 0.00081961 | 0.01017171 | cell-cycle-associated protein kinase PRP4, putative          |
| TGME49_289320 | -1.06 | 7.44 | 0.00082927 | 0.01025716 | casein kinase I, putative                                    |
| TGME49_294730 | -1.44 | 6.07 | 0.00082918 | 0.01025716 | hypothetical protein                                         |
| TGME49_251640 | -1.48 | 5.81 | 0.00083166 | 0.01026965 | ubiquitin-conjugating enzyme subfamily protein               |
| TGME49_266990 | -1.05 | 7.64 | 0.00083493 | 0.01029278 | beta-COP                                                     |
| TGME49_288360 | 1.42  | 9.40 | 0.0008403  | 0.0103247  | tryptophanyl-tRNA synthetase (TrpRS2)                        |
| TGME49_263610 | -1.62 | 6.26 | 0.00084002 | 0.0103247  | hypothetical protein                                         |
| TGME49_280560 | -1.19 | 6.83 | 0.00085399 | 0.01047554 | selenide, water dikinase                                     |
| TGME49_251790 | 1.23  | 6.10 | 0.00085793 | 0.01050644 | hypothetical protein                                         |
| TGME49_318360 | -1.34 | 6.53 | 0.00086386 | 0.01054417 | hypothetical protein                                         |
| TGME49_266900 | 1.15  | 8.02 | 0.00086671 | 0.01056157 | cyclin, N-terminal domain-containing protein                 |
| TGME49_225800 | 1.18  | 6.01 | 0.00086896 | 0.01057164 | iron-sulfur assembly ATPase                                  |
| TGME49_261850 | 2.02  | 5.09 | 0.00087126 | 0.01057681 | helicase, putative                                           |
| TGME49_288840 | 1.13  | 7.00 | 0.00087734 | 0.01057681 | hypothetical protein                                         |
| TGME49_253000 | 1.04  | 6.88 | 0.00087673 | 0.01057681 | ELMO/CED-12 family protein                                   |
| TGME49_318320 | -1.94 | 5.30 | 0.00087448 | 0.01057681 | ATP-dependent Clp endopeptidase, proteolytic subunit ClpP    |
| TGME49_201200 | -2.28 | 4.87 | 0.00087795 | 0.01057681 | zinc finger (CCCH type) motif-containing protein             |
| TGME49_288700 | -1.75 | 5.73 | 0.00088954 | 0.01069907 | RecF/RecN/SMC N terminal domain-containing protein           |
| TGME49_262430 | 1.49  | 5.77 | 0.00090469 | 0.01085163 | 4-hydroxy-3-methylbut-2-en-1-yl diphosphate synthase         |
| TGME49_244260 | -2.77 | 4.83 | 0.00090516 | 0.01085163 | hypothetical protein                                         |
| TGME49_254930 | 0.99  | 7.07 | 0.00091218 | 0.01090913 | hypothetical protein                                         |
| TGME49_214210 | -1.23 | 8.20 | 0.0009129  | 0.01090913 | rRNA pseudouridine synthase                                  |
| TGME49_223950 | 1.07  | 6.29 | 0.00092139 | 0.01099293 | hypothetical protein                                         |
| TGME49_202250 | 1.21  | 5.90 | 0.00092719 | 0.01104432 | hypothetical protein                                         |
| TGME49_270650 | 1.57  | 5.21 | 0.00093035 | 0.01105672 | deoxyribose-phosphate aldolase                               |
| TGME49_260610 | -2.51 | 4.95 | 0.00093122 | 0.01105672 | methyltransferase                                            |
| TGME49_215710 | -1.39 | 6.00 | 0.00094546 | 0.01119001 | hypothetical protein                                         |
| TGME49_318570 | 2.26  | 5.58 | 0.00094726 | 0.01119334 | SFT2 family protein                                          |
| TGME49_202650 | -1.59 | 5.60 | 0.00095246 | 0.01123692 | hypothetical protein                                         |
| TGME49_226830 | -1.17 | 8.44 | 0.00097006 | 0.01138546 | DnaK family protein                                          |
| TGME49_312380 | -1.95 | 5.23 | 0.00097797 | 0.01141062 | tetratricopeptide repeat-containing protein                  |
| TGME49_218200 | -2.13 | 5.22 | 0.00097766 | 0.01141062 | UDP-sugar pyrophosphorylase                                  |
| TGME49_260390 | -1.48 | 5.62 | 0.00098353 | 0.01143952 | hypothetical protein                                         |
| TGME49_267450 | -1.51 | 6.10 | 0.00098351 | 0.01143952 | alpha-tubulin suppressor protein                             |
| TGME49_319930 | -1.46 | 6.12 | 0.00099318 | 0.01153365 | hypothetical protein                                         |
| TGME49_253370 | 1.14  | 7.36 | 0.00099554 | 0.01154296 | hypothetical protein                                         |
| TGME49_298840 | 1.20  | 6.46 | 0.00101017 | 0.01169428 | hypothetical protein                                         |
| TGME49_235490 | -1.11 | 6.76 | 0.00102453 | 0.01184208 | hypothetical protein                                         |
| TGME49_300290 | -1.47 | 5.92 | 0.00103474 | 0.01194136 | SNARE domain-containing protein                              |
| TGME49_311310 | -1.09 | 8.09 | 0.00103868 | 0.01196827 | protein phosphatase 2B catalytic subunit, calcineurin family |
| TGME49_225560 | -1.13 | 8.81 | 0.0010552  | 0.0121397  | hypothetical protein                                         |
| TGME49_269430 | -1.63 | 5.52 | 0.00105913 | 0.01216606 | polyprenyl synthetase superfamily protein                    |
| TGME49_267620 | 1.08  | 6.83 | 0.0010627  | 0.0121882  | multi-pass transmembrane protein                             |
| TGME49_268580 | -1.25 | 6.39 | 0.00107221 | 0.01225929 | hypothetical protein                                         |
| TGME49_253560 | 1.29  | 5.72 | 0.00107853 | 0.01231252 | hypothetical protein                                         |
| TGME49_319308 | -1.95 | 5.73 | 0.00108228 | 0.01233634 | hypothetical protein                                         |
| TGME49_252230 | 1.47  | 6.21 | 0.00108922 | 0.01239642 | hypothetical protein                                         |

|               |       |       |            |            |                                                                 |
|---------------|-------|-------|------------|------------|-----------------------------------------------------------------|
| TGME49_282170 | 1.22  | 6.39  | 0.00109738 | 0.01241297 | hypothetical protein                                            |
| TGME49_294820 | 1.18  | 7.52  | 0.00109703 | 0.01241297 | type I fatty acid synthase, putative                            |
| TGME49_265390 | -1.40 | 6.56  | 0.00109428 | 0.01241297 | hypothetical protein                                            |
| TGME49_233760 | -1.53 | 6.40  | 0.00109293 | 0.01241297 | hypothetical protein                                            |
| TGME49_309280 | -1.70 | 5.10  | 0.0011053  | 0.01246828 | zinc finger, C3HC4 type (RING finger) domain-containing protein |
| TGME49_229250 | 1.53  | 9.83  | 0.00110783 | 0.01247313 | ribosomal protein RPL28                                         |
| TGME49_313830 | -1.30 | 6.30  | 0.00110943 | 0.01247313 | AARP2CN (NUC121) domain-containing protein                      |
| TGME49_235020 | -0.99 | 7.55  | 0.00111319 | 0.01249519 | COPI protein, putative                                          |
| TGME49_269420 | 2.18  | 6.35  | 0.00113009 | 0.01264782 | hypothetical protein                                            |
| TGME49_211020 | -1.69 | 6.55  | 0.00113601 | 0.01267574 | RNA recognition motif-containing protein                        |
| TGME49_252260 | 1.73  | 4.57  | 0.00114403 | 0.01274607 | hypothetical protein                                            |
| TGME49_254110 | 1.55  | 5.41  | 0.00114632 | 0.01274743 | tryptophanyl-tRNA synthetase (TrpRS1)                           |
| TGME49_264840 | -2.19 | 4.93  | 0.0011476  | 0.01274743 | ATP-dependent DNA helicase, RecQ family protein                 |
| TGME49_263085 | -1.79 | 5.01  | 0.00114944 | 0.01274879 | hypothetical protein                                            |
| TGME49_204420 | -1.23 | 5.87  | 0.00115475 | 0.01278859 | oocyst wall protein OWP1                                        |
| TGME49_214180 | -0.96 | 7.70  | 0.00116403 | 0.01287208 | ENTH domain-containing protein                                  |
| TGME49_222920 | 1.22  | 6.27  | 0.00117192 | 0.01292891 | mbp-1 interacting protein-2a family protein                     |
| TGME49_212130 | -1.33 | 6.44  | 0.00117307 | 0.01292891 | phospholipase, patatin family protein                           |
| TGME49_316140 | -1.10 | 6.99  | 0.00117961 | 0.01296697 | hypothetical protein                                            |
| TGME49_278770 | -1.28 | 7.00  | 0.00118238 | 0.01297811 | hypothetical protein                                            |
| TGME49_270930 | -1.14 | 6.53  | 0.00118592 | 0.01299771 | hypothetical protein                                            |
| TGME49_220940 | 1.41  | 5.59  | 0.00124934 | 0.01365246 | ribosomal RNA methyltransferase (FtsJ ) family protein          |
| TGME49_253730 | 1.23  | 6.80  | 0.00125547 | 0.01367906 | importin-beta N-terminal domain-containing protein              |
| TGME49_225060 | -1.19 | 6.75  | 0.00125546 | 0.01367906 | nucleoredoxin family protein                                    |
| TGME49_234360 | -1.04 | 6.88  | 0.00128091 | 0.01389496 | DNA topoisomerase I, putative                                   |
| TGME49_249950 | -1.55 | 5.77  | 0.00127981 | 0.01389496 | Mak16 protein                                                   |
| TGME49_214530 | -1.85 | 6.70  | 0.00127734 | 0.01389496 | DnaJ domain-containing protein                                  |
| TGME49_267580 | 2.00  | 5.90  | 0.00130161 | 0.01409886 | cyclin2 related protein                                         |
| TGME49_204880 | 1.39  | 5.85  | 0.00130853 | 0.01412612 | hypothetical protein                                            |
| TGME49_311510 | 0.88  | 8.03  | 0.00130801 | 0.01412612 | eIF2 kinase IF2K-B                                              |
| TGME49_216920 | -1.58 | 5.80  | 0.00130985 | 0.01412612 | mediator complex subunit MED8                                   |
| TGME49_310910 | 1.39  | 5.43  | 0.00132952 | 0.01425532 | WD domain, G-beta repeat-containing protein                     |
| TGME49_231210 | -1.13 | 7.07  | 0.00132694 | 0.01425532 | sarcalumenin/eps15 family protein                               |
| TGME49_314660 | -1.21 | 6.93  | 0.00132826 | 0.01425532 | TPRX1 protein                                                   |
| TGME49_224730 | -1.53 | 5.88  | 0.00133151 | 0.01425603 | hypothetical protein                                            |
| TGME49_301216 | -2.44 | 4.54  | 0.00133865 | 0.01429114 | endonuclease/exonuclease/phosphatase family protein             |
| TGME49_244600 | -1.52 | 5.95  | 0.0013467  | 0.01435642 | hypothetical protein                                            |
| TGME49_212220 | 0.94  | 7.85  | 0.00136052 | 0.01448288 | hypothetical protein                                            |
| TGME49_292110 | 1.45  | 6.61  | 0.00138528 | 0.01470267 | formate/nitrite transporter protein                             |
| TGME49_249620 | -1.31 | 6.08  | 0.00138712 | 0.01470267 | histone deacetylase HDAC2                                       |
| TGME49_207680 | -1.13 | 7.36  | 0.00138918 | 0.0147035  | suppressor of kinetochore protein 1, putative                   |
| TGME49_289710 | 1.56  | 6.31  | 0.00139221 | 0.01471456 | AP2 domain transcription factor AP2IX-5                         |
| TGME49_312050 | -0.96 | 7.51  | 0.00140219 | 0.0147824  | small GTPase Rab2, putative                                     |
| TGME49_220290 | -1.77 | 5.53  | 0.00142665 | 0.01501422 | hypothetical protein                                            |
| TGME49_313350 | -1.35 | 5.79  | 0.00142881 | 0.0150157  | hypothetical protein                                            |
| TGME49_261540 | 1.31  | 5.45  | 0.00144    | 0.01511188 | DNA-directed RNA polymerase I RPAC2                             |
| TGME49_262980 | -1.74 | 5.57  | 0.0014427  | 0.0151188  | hypothetical protein                                            |
| TGME49_229350 | -1.31 | 6.25  | 0.00145963 | 0.01527456 | HEAT repeat-containing protein                                  |
| TGME49_299780 | 1.00  | 8.50  | 0.00147029 | 0.01532119 | hypothetical protein                                            |
| TGME49_268900 | -1.44 | 5.76  | 0.00146848 | 0.01532119 | dense granular protein GRA10                                    |
| TGME49_280710 | -1.25 | 8.04  | 0.00147353 | 0.01533344 | 20S proteasome subunit beta 7, putative                         |
| TGME49_237260 | -1.08 | 6.71  | 0.00148539 | 0.01543517 | Coiled-coil domain containing 124 family protein                |
| TGME49_263595 | -1.57 | 5.60  | 0.00149897 | 0.01553266 | RNA-binding protein                                             |
| TGME49_246800 | -1.24 | 6.38  | 0.00150353 | 0.01555818 | acylaminoacyl-peptidase, putative                               |
| TGME49_205700 | 1.48  | 10.39 | 0.0015088  | 0.01559093 | cyclophilin precursor                                           |
| TGME49_268230 | -2.84 | 5.64  | 0.00151721 | 0.01563428 | hypothetical protein                                            |
| TGME49_212800 | -1.49 | 6.59  | 0.00152503 | 0.015693   | hypothetical protein                                            |

|               |       |      |            |            |                                                              |
|---------------|-------|------|------------|------------|--------------------------------------------------------------|
| TGME49_273320 | -0.86 | 8.00 | 0.00153692 | 0.01579341 | hypothetical protein                                         |
| TGME49_231230 | -2.42 | 4.52 | 0.00155329 | 0.01589543 | hypothetical protein                                         |
| TGME49_214580 | -3.68 | 4.76 | 0.00155806 | 0.01592232 | tetratricopeptide repeat-containing protein                  |
| TGME49_209095 | -1.13 | 6.83 | 0.00156533 | 0.01597459 | hypothetical protein                                         |
| TGME49_259600 | 1.52  | 5.22 | 0.00160114 | 0.01631753 | hypothetical protein                                         |
| TGME49_208820 | 1.15  | 5.90 | 0.00161946 | 0.0164156  | 1-deoxy-D-xylulose-5-phosphate synthase                      |
| TGME49_224980 | -1.23 | 6.80 | 0.00162714 | 0.01646863 | hypothetical protein                                         |
| TGME49_235610 | -1.70 | 5.16 | 0.0016293  | 0.01646863 | ATPase, AAA family protein                                   |
| TGME49_294790 | 0.91  | 8.88 | 0.00163592 | 0.01651299 | hypothetical protein                                         |
| TGME49_248610 | 1.33  | 5.56 | 0.00163968 | 0.01652846 | hypothetical protein                                         |
| TGME49_292610 | 1.36  | 5.59 | 0.00164799 | 0.01658962 | Toxoplasma gondii family C protein                           |
| TGME49_253310 | 1.22  | 5.37 | 0.00166864 | 0.01677471 | hypothetical protein                                         |
| TGME49_275870 | 1.41  | 5.25 | 0.00169095 | 0.01697595 | tubulin/FtsZ family, GTPase domain-containing protein        |
| TGME49_292950 | 1.10  | 7.04 | 0.00170228 | 0.01704351 | hypothetical protein                                         |
| TGME49_315100 | 2.60  | 4.60 | 0.00170643 | 0.01706199 | hypothetical protein                                         |
| TGME49_200360 | 1.25  | 9.81 | 0.00172505 | 0.01722174 | hypothetical protein                                         |
| TGME49_207900 | -1.23 | 6.22 | 0.00172706 | 0.01722174 | transcription initiation factor TFIIIB                       |
| TGME49_314695 | -1.50 | 6.57 | 0.0017351  | 0.01727869 | hypothetical protein                                         |
| TGME49_230705 | 1.26  | 6.59 | 0.00173754 | 0.01727979 | hypothetical protein                                         |
| TGME49_297510 | -1.70 | 5.94 | 0.00174138 | 0.01729396 | hypothetical protein                                         |
| TGME49_228720 | -1.65 | 5.08 | 0.00175019 | 0.01733578 | hypothetical protein                                         |
| TGME49_226100 | -2.58 | 5.42 | 0.00175709 | 0.01738084 | haloacid dehalogenase family hydrolase domain-containing     |
| TGME49_270160 | -1.39 | 5.77 | 0.00176194 | 0.0174056  | hypothetical protein                                         |
| TGME49_278830 | -0.99 | 8.64 | 0.00177988 | 0.01755946 | glucose-6-phosphate 1-dehydrogenase                          |
| TGME49_249550 | -1.45 | 5.67 | 0.00178513 | 0.01758779 | hypothetical protein                                         |
| TGME49_271030 | 1.84  | 6.63 | 0.00182048 | 0.01786483 | AP2 domain transcription factor AP2VIII-6                    |
| TGME49_246050 | -2.03 | 5.13 | 0.00182376 | 0.01787335 | hypothetical protein                                         |
| TGME49_314700 | 1.42  | 6.55 | 0.00183723 | 0.01795781 | hypothetical protein                                         |
| TGME49_254800 | 1.27  | 5.96 | 0.0018369  | 0.01795781 | hypothetical protein                                         |
| TGME49_207065 | 1.19  | 5.52 | 0.00185127 | 0.01804748 | hypothetical protein                                         |
| TGME49_208740 | 1.29  | 9.78 | 0.00186231 | 0.0181312  | microneme protein, putative                                  |
| TGME49_253820 | 0.94  | 8.35 | 0.00186765 | 0.01815939 | hypothetical protein                                         |
| TGME49_267660 | -1.04 | 6.87 | 0.00188778 | 0.01830701 | hypothetical protein                                         |
| TGME49_267750 | -1.15 | 6.69 | 0.0019001  | 0.01840238 | hypothetical protein                                         |
| TGME49_224310 | -1.28 | 6.08 | 0.00190472 | 0.01842307 | DHHC zinc finger domain-containing protein                   |
| TGME49_223910 | -1.14 | 7.08 | 0.00191217 | 0.01844697 | acyltransferase domain-containing protein                    |
| TGME49_258980 | -1.74 | 5.28 | 0.0019158  | 0.01845798 | hypothetical protein                                         |
| TGME49_309010 | -1.67 | 4.97 | 0.00193965 | 0.01863924 | elongation factor P, putative                                |
| TGME49_238170 | 1.47  | 5.73 | 0.00196147 | 0.0188002  | hypothetical protein                                         |
| TGME49_275450 | 0.85  | 7.53 | 0.00196078 | 0.0188002  | hypothetical protein                                         |
| TGME49_253650 | 0.84  | 8.06 | 0.00198352 | 0.01896245 | DnaJ C terminal region domain-containing protein             |
| TGME49_315250 | 1.10  | 5.99 | 0.00199665 | 0.0190531  | GAMM1 protein, putative                                      |
| TGME49_221230 | -1.20 | 6.64 | 0.00199815 | 0.0190531  | hypothetical protein                                         |
| TGME49_304670 | -1.33 | 6.35 | 0.00200227 | 0.01906791 | leucine rich repeat-containing protein                       |
| TGME49_284660 | 1.30  | 5.36 | 0.0020125  | 0.01909169 | mitochondrial ribosomal protein s6-2, putative               |
| TGME49_249380 | -1.03 | 6.91 | 0.00200743 | 0.01909169 | DHHC zinc finger domain-containing protein                   |
| TGME49_311905 | -2.42 | 4.73 | 0.00201007 | 0.01909169 | hypothetical protein                                         |
| TGME49_263840 | -1.19 | 6.12 | 0.00202438 | 0.01915536 | hypothetical protein                                         |
| TGME49_263785 | -2.30 | 4.86 | 0.00202384 | 0.01915536 | phosphatidate cytidyltransferase                             |
| TGME49_272030 | -1.20 | 6.10 | 0.002036   | 0.01919176 | kelch repeat-containing protein                              |
| TGME49_268690 | 1.67  | 4.84 | 0.00208062 | 0.01951306 | hypothetical protein                                         |
| TGME49_244870 | -1.26 | 5.84 | 0.00208811 | 0.0195585  | quinone oxidoreductase, putative                             |
| TGME49_214320 | 1.13  | 9.30 | 0.00209948 | 0.01964026 | facilitative glucose transporter GT1                         |
| TGME49_229140 | 1.35  | 6.54 | 0.00211017 | 0.01971532 | MaoC family domain-containing protein                        |
| TGME49_255240 | -1.71 | 5.60 | 0.0021158  | 0.01974306 | hypothetical protein                                         |
| TGME49_247690 | -1.07 | 7.31 | 0.00213482 | 0.01989545 | phospholipid-translocating P-type ATPase, flippase subfamily |

|               |       |       |            |            |                                                            |
|---------------|-------|-------|------------|------------|------------------------------------------------------------|
| TGME49_214750 | -1.02 | 6.75  | 0.00215339 | 0.01994802 | hypothetical protein                                       |
| TGME49_263510 | -1.86 | 5.94  | 0.00214682 | 0.01994802 | Spc97 / Spc98 family protein                               |
| TGME49_308050 | -1.10 | 6.70  | 0.00215877 | 0.01996799 | thioredoxin domain-containing protein                      |
| TGME49_321170 | 1.39  | 4.77  | 0.00217103 | 0.02000644 | Toxoplasma gondii family C protein                         |
| TGME49_222245 | -1.08 | 6.95  | 0.00216899 | 0.02000644 | hypothetical protein                                       |
| TGME49_258070 | -1.18 | 6.52  | 0.00219516 | 0.02017857 | hypothetical protein                                       |
| TGME49_289140 | 0.96  | 6.35  | 0.00220571 | 0.0202504  | ribosomal protein l22/l43, putative                        |
| TGME49_247460 | 0.85  | 8.25  | 0.00222221 | 0.02035148 | proliferating cell nuclear antigen PCNA1                   |
| TGME49_251530 | 2.11  | 4.57  | 0.0022663  | 0.02070408 | hypothetical protein                                       |
| TGME49_226270 | 1.09  | 5.99  | 0.00226603 | 0.02070408 | hypothetical protein                                       |
| TGME49_204350 | 2.00  | 5.81  | 0.00227743 | 0.02078011 | hypothetical protein                                       |
| TGME49_228070 | 1.56  | 4.89  | 0.00228269 | 0.02080255 | hypothetical protein                                       |
| TGME49_280375 | 2.33  | 5.70  | 0.00233779 | 0.02127848 | hypothetical protein                                       |
| TGME49_203080 | 1.05  | 6.45  | 0.00236947 | 0.02154035 | RNA recognition motif-containing protein                   |
| TGME49_301890 | -1.68 | 6.19  | 0.0023948  | 0.02171733 | Toxoplasma gondii family B protein                         |
| TGME49_235540 | 1.00  | 8.28  | 0.00242332 | 0.02192997 | eukaryotic initiation factor-2 beta, putative              |
| TGME49_306260 | 1.02  | 6.14  | 0.00243955 | 0.02202621 | hypothetical protein                                       |
| TGME49_299180 | -1.97 | 5.70  | 0.00244372 | 0.02202621 | prenylated protein, putative                               |
| TGME49_294310 | 1.42  | 4.82  | 0.0024595  | 0.02214151 | hypothetical protein                                       |
| TGME49_261670 | 1.33  | 5.19  | 0.00247502 | 0.02222932 | ribonuclease H1/H2 small subunit protein                   |
| TGME49_208830 | 1.17  | 8.09  | 0.00248697 | 0.02230742 | hypothetical protein                                       |
| TGME49_245540 | -1.08 | 6.98  | 0.0025046  | 0.02243842 | hypothetical protein                                       |
| TGME49_216880 | 3.06  | 12.29 | 0.00255082 | 0.02278298 | guanine nucleotide-binding protein                         |
| TGME49_253615 | 1.30  | 5.78  | 0.00255111 | 0.02278298 | hypothetical protein                                       |
| TGME49_295070 | 1.17  | 5.71  | 0.00255681 | 0.02278298 | helicase associated domain (ha2) protein                   |
| TGME49_228110 | -1.31 | 6.14  | 0.00255843 | 0.02278298 | hypothetical protein                                       |
| TGME49_285490 | -1.46 | 5.79  | 0.00255613 | 0.02278298 | helix-hairpin-helix motif domain-containing protein        |
| TGME49_276930 | 0.90  | 8.13  | 0.0025666  | 0.02282335 | hypothetical protein                                       |
| TGME49_214780 | -1.54 | 5.82  | 0.00256913 | 0.02282335 | hydrolase, NUDIX family protein                            |
| TGME49_224480 | -1.12 | 6.40  | 0.00258737 | 0.02295789 | cell-cycle-associated protein kinase CLK, putative         |
| TGME49_202280 | -1.90 | 5.61  | 0.00260292 | 0.02306827 | WD domain, G-beta repeat-containing protein                |
| TGME49_210255 | 0.92  | 6.96  | 0.00262003 | 0.02319214 | hypothetical protein                                       |
| TGME49_265410 | 1.53  | 5.34  | 0.00262775 | 0.02323269 | G-protein beta WD-40 repeat containing protein             |
| TGME49_245500 | 1.22  | 5.63  | 0.00263293 | 0.02325078 | dipeptidyl peptidase iv (dpp iv) n-terminal region domain- |
| TGME49_245480 | 2.22  | 5.06  | 0.00264901 | 0.0233649  | hypothetical protein                                       |
| TGME49_202980 | -1.12 | 6.64  | 0.00267091 | 0.02353002 | hypothetical protein                                       |
| TGME49_209210 | -1.10 | 6.93  | 0.00267911 | 0.02357424 | hypothetical protein                                       |
| TGME49_319710 | -1.31 | 6.20  | 0.00268688 | 0.02361461 | kinesin motor domain-containing protein                    |
| TGME49_220160 | 2.33  | 4.59  | 0.00272524 | 0.02387523 | WD domain-containing protein                               |
| TGME49_263080 | 0.90  | 7.13  | 0.0027262  | 0.02387523 | hypothetical protein                                       |
| TGME49_306470 | -1.14 | 6.37  | 0.00274211 | 0.02398614 | isoprenylcysteine carboxyl methyltransferase (icmt) family |
| TGME49_313277 | -2.03 | 4.54  | 0.0027478  | 0.02400765 | hypothetical protein                                       |
| TGME49_285540 | -1.59 | 4.92  | 0.00278664 | 0.02431824 | DNA-directed DNA polymerase                                |
| TGME49_201220 | -1.50 | 5.67  | 0.00279131 | 0.02433034 | zinc finger protein                                        |
| TGME49_293190 | -1.01 | 7.22  | 0.00279837 | 0.02436324 | endonuclease/exonuclease/phosphatase family protein        |
| TGME49_319500 | -1.04 | 7.26  | 0.00281846 | 0.02450936 | hypothetical protein                                       |
| TGME49_238110 | -1.50 | 6.11  | 0.00283115 | 0.02453564 | replication factor a protein 3 protein                     |
| TGME49_246760 | -2.21 | 4.72  | 0.00283104 | 0.02453564 | hypothetical protein                                       |
| TGME49_313600 | -1.33 | 6.04  | 0.00286526 | 0.02477092 | DDHD domain-containing protein                             |
| TGME49_265520 | -0.89 | 7.43  | 0.00288969 | 0.02495307 | hypothetical protein                                       |
| TGME49_203350 | 1.48  | 5.16  | 0.00291196 | 0.02508687 | hypothetical protein                                       |
| TGME49_215060 | -1.03 | 7.21  | 0.00290964 | 0.02508687 | small GTP-binding protein sar1, putative                   |
| TGME49_211860 | 1.10  | 6.12  | 0.00296059 | 0.02537743 | hypothetical protein                                       |
| TGME49_312940 | 0.97  | 8.38  | 0.00296091 | 0.02537743 | hypothetical protein                                       |
| TGME49_246970 | -1.45 | 5.30  | 0.00295268 | 0.02537743 | 3'-5' exonuclease domain-containing protein                |
| TGME49_320000 | -1.41 | 5.47  | 0.00299175 | 0.02556616 | SCY kinase (incomplete catalytic triad)                    |
| TGME49_294930 | -1.08 | 7.12  | 0.00301822 | 0.02575003 | leucine rich repeat-containing protein                     |

|               |       |       |            |            |                                                          |
|---------------|-------|-------|------------|------------|----------------------------------------------------------|
| TGME49_219720 | 1.24  | 6.23  | 0.00303944 | 0.02588418 | Ras-related protein Rab-5C, putative                     |
| TGME49_254460 | 1.01  | 7.06  | 0.00305888 | 0.0260191  | hypothetical protein                                     |
| TGME49_266070 | 1.33  | 10.10 | 0.00307714 | 0.02611669 | ribosomal protein RPL31                                  |
| TGME49_305140 | 1.08  | 6.47  | 0.00307899 | 0.02611669 | phospholipase, patatin family protein                    |
| TGME49_293790 | 1.08  | 5.45  | 0.00308085 | 0.02611669 | hypothetical protein                                     |
| TGME49_257595 | -1.23 | 5.98  | 0.00309458 | 0.02620314 | hypothetical protein                                     |
| TGME49_254120 | 0.96  | 8.64  | 0.00312777 | 0.0264206  | autophagy-related protein 8 atg8, putative               |
| TGME49_221390 | -1.24 | 6.10  | 0.00313096 | 0.0264206  | hypothetical protein                                     |
| TGME49_293220 | 1.44  | 5.11  | 0.00317283 | 0.02674343 | DHHC zinc finger domain-containing protein               |
| TGME49_311890 | -0.94 | 7.52  | 0.00323902 | 0.0272419  | hypothetical protein                                     |
| TGME49_278740 | -1.25 | 5.53  | 0.00323932 | 0.0272419  | diaminopimelate decarboxylase                            |
| TGME49_253880 | 0.81  | 7.79  | 0.00324602 | 0.02726731 | GNS1/SUR4 family protein                                 |
| TGME49_213910 | -1.27 | 5.99  | 0.00326551 | 0.02736896 | hypothetical protein                                     |
| TGME49_304680 | -1.43 | 5.66  | 0.00326373 | 0.02736896 | ubiquitin family protein                                 |
| TGME49_275810 | 1.45  | 10.26 | 0.0032805  | 0.02741037 | ribosomal protein RPS10                                  |
| TGME49_221510 | -1.15 | 8.07  | 0.00327742 | 0.02741037 | hypothetical protein                                     |
| TGME49_228370 | -1.26 | 5.97  | 0.00328525 | 0.02741037 | hypothetical protein                                     |
| TGME49_315590 | -1.38 | 5.72  | 0.00328197 | 0.02741037 | macro domain-containing protein                          |
| TGME49_263290 | 1.46  | 5.21  | 0.00329622 | 0.02747094 | rhomboid protease ROM2                                   |
| TGME49_290270 | -1.20 | 6.19  | 0.00330298 | 0.0274964  | SPRY domain-containing protein                           |
| TGME49_202240 | -2.36 | 4.63  | 0.00330818 | 0.02750879 | RAP domain-containing protein                            |
| TGME49_248370 | 1.41  | 5.44  | 0.00333287 | 0.02768302 | prefoldin subunit 6, putative                            |
| TGME49_290720 | -0.83 | 7.77  | 0.00333803 | 0.02769484 | vacuolar proton translocating ATPase subunit, putative   |
| TGME49_263660 | -2.33 | 4.59  | 0.0033557  | 0.02781031 | hypothetical protein                                     |
| TGME49_213710 | -1.28 | 6.17  | 0.00338044 | 0.02798397 | WD domain, G-beta repeat-containing protein              |
| TGME49_283585 | -1.30 | 5.67  | 0.00342378 | 0.02831113 | hypothetical protein                                     |
| TGME49_237480 | -1.55 | 5.26  | 0.00343441 | 0.02836739 | BRCA1 C Terminus (BRCT) domain-containing protein        |
| TGME49_220530 | -1.64 | 5.46  | 0.00346311 | 0.02850911 | AP2 domain transcription factor AP2V-1                   |
| TGME49_263720 | -1.87 | 5.02  | 0.00347647 | 0.02858735 | HMG (high mobility group) box domain-containing protein  |
| TGME49_249240 | 1.13  | 9.83  | 0.00349874 | 0.02870671 | calmodulin, putative                                     |
| TGME49_225680 | -1.74 | 5.41  | 0.00349521 | 0.02870671 | hypothetical protein                                     |
| TGME49_201400 | -1.41 | 5.98  | 0.00351383 | 0.02876679 | Sin3-associated polypeptide SAP18                        |
| TGME49_306410 | -1.76 | 5.32  | 0.00352326 | 0.02881217 | hypothetical protein                                     |
| TGME49_249480 | 1.07  | 5.88  | 0.00353917 | 0.02891037 | tetratricopeptide repeat-containing protein              |
| TGME49_216260 | -0.98 | 7.05  | 0.0035732  | 0.02914173 | eukaryotic initiation factor-2B, gamma subunit, putative |
| TGME49_289180 | -1.21 | 5.71  | 0.00358233 | 0.0291608  | thioredoxin family redox-active protein, putative        |
| TGME49_252640 | 1.57  | 4.57  | 0.003606   | 0.02923072 | P-type ATPase PMA1                                       |
| TGME49_290950 | -0.86 | 7.68  | 0.00360004 | 0.02923072 | clathrin heavy chain, putative                           |
| TGME49_262700 | -1.61 | 5.53  | 0.00360512 | 0.02923072 | tetratricopeptide repeat-containing protein              |
| TGME49_269075 | 1.68  | 4.72  | 0.00363291 | 0.02941663 | hypothetical protein                                     |
| TGME49_253380 | 0.83  | 8.39  | 0.0036537  | 0.02952049 | AP2 domain transcription factor AP2III-2                 |
| TGME49_258105 | -2.15 | 4.46  | 0.00366285 | 0.02956213 | hypothetical protein                                     |
| TGME49_237230 | 1.11  | 9.68  | 0.00367339 | 0.0296003  | hypothetical protein                                     |
| TGME49_202300 | -1.29 | 5.80  | 0.00367557 | 0.0296003  | inosine triphosphate pyrophosphatase, putative           |
| TGME49_215990 | -1.57 | 5.28  | 0.00370626 | 0.02981504 | helicase, putative                                       |
| TGME49_314840 | -1.19 | 6.09  | 0.00371979 | 0.02989146 | ubiquitin carboxyl-terminal hydrolase                    |
| TGME49_253440 | 0.81  | 8.62  | 0.00375668 | 0.03013232 | cell-cycle-associated protein kinase SRPK, putative      |
| TGME49_213950 | -1.11 | 6.02  | 0.00376325 | 0.0301426  | hypothetical protein                                     |
| TGME49_308040 | -1.22 | 5.84  | 0.00376848 | 0.0301519  | ZPR1 zinc finger domain-containing protein               |
| TGME49_207970 | -3.06 | 4.61  | 0.00379992 | 0.03033791 | HEAT repeat-containing protein                           |
| TGME49_208850 | 1.56  | 5.42  | 0.00384551 | 0.03048944 | SAG-related sequence SRS11                               |
| TGME49_210408 | 1.42  | 10.56 | 0.00383279 | 0.03048944 | HMG (high mobility group) box domain-containing protein  |
| TGME49_254820 | 0.97  | 7.23  | 0.00383891 | 0.03048944 | hypothetical protein                                     |
| TGME49_293680 | -1.30 | 6.69  | 0.0038477  | 0.03048944 | hypothetical protein                                     |
| TGME49_291690 | -1.33 | 5.50  | 0.00384417 | 0.03048944 | hypothetical protein                                     |
| TGME49_260830 | -2.20 | 5.12  | 0.00383052 | 0.03048944 | hypothetical protein                                     |
| TGME49_295420 | -0.94 | 7.67  | 0.00386814 | 0.03061866 | hypothetical protein                                     |



|               |       |       |            |            |                                                                |
|---------------|-------|-------|------------|------------|----------------------------------------------------------------|
| TGME49_226320 | -1.05 | 6.35  | 0.00387296 | 0.03062405 | hypothetical protein                                           |
| TGME49_245730 | 2.35  | 4.70  | 0.00391347 | 0.03087848 | phosphatidylinositol-4-phosphate 5-Kinase                      |
| TGME49_262730 | 0.88  | 8.05  | 0.00391304 | 0.03087848 | rhoprtry protein ROP16                                         |
| TGME49_312210 | 1.76  | 4.65  | 0.0039584  | 0.03119975 | hypothetical protein                                           |
| TGME49_240600 | 0.97  | 7.27  | 0.00404162 | 0.03178807 | chaperonin cpn60, putative                                     |
| TGME49_301460 | 1.63  | 4.68  | 0.00405212 | 0.03183682 | hypothetical protein                                           |
| TGME49_297650 | -1.02 | 8.05  | 0.00406762 | 0.0318744  | Ser/Thr phosphatase family protein                             |
| TGME49_259720 | -1.19 | 6.13  | 0.0040698  | 0.0318744  | hypothetical protein                                           |
| TGME49_305860 | -0.87 | 7.96  | 0.00407955 | 0.03191695 | calcium-dependent protein kinase CDPK3                         |
| TGME49_208580 | -1.19 | 6.18  | 0.00412095 | 0.03220684 | DNA ligase 1, putative                                         |
| TGME49_291350 | -1.66 | 5.13  | 0.00413899 | 0.03231379 | hypothetical protein                                           |
| TGME49_226080 | -1.60 | 5.21  | 0.00416693 | 0.03249532 | polyA polymerase                                               |
| TGME49_215250 | -1.94 | 5.14  | 0.0042011  | 0.0326953  | thiamin pyrophosphokinase, catalytic domain-containing protein |
| TGME49_319860 | -1.01 | 6.84  | 0.00421515 | 0.03273593 | DNA polymerase family B protein                                |
| TGME49_216750 | -1.10 | 6.58  | 0.00421486 | 0.03273593 | Paf1/RNA polymerase II complex component LEO1                  |
| TGME49_202510 | 1.65  | 5.53  | 0.00423183 | 0.03279744 | multi-pass transmembrane protein                               |
| TGME49_261720 | -0.98 | 7.53  | 0.00425096 | 0.03284191 | metal cation transporter, ZIP family protein                   |
| TGME49_262860 | -1.51 | 5.63  | 0.00424704 | 0.03284191 | ADP-ribosylation factor family protein 1, putative             |
| TGME49_207990 | 0.97  | 6.24  | 0.00425883 | 0.03286844 | ribosomal RNA large subunit methyltransferase J protein        |
| TGME49_320650 | -1.52 | 4.91  | 0.00427597 | 0.03293206 | ankyrin repeat-containing protein                              |
| TGME49_221160 | 1.68  | 5.19  | 0.00428297 | 0.03295174 | acetyltransferase, GNAT family protein                         |
| TGME49_309090 | -1.20 | 5.89  | 0.00431084 | 0.03313175 | hypothetical protein                                           |
| TGME49_237550 | 1.76  | 5.18  | 0.00432132 | 0.03314026 | hypothetical protein                                           |
| TGME49_244680 | 1.39  | 4.89  | 0.00432537 | 0.03314026 | hypothetical protein                                           |
| TGME49_231870 | -1.74 | 5.00  | 0.00432282 | 0.03314026 | tetratricopeptide repeat-containing protein                    |
| TGME49_308020 | -0.87 | 8.65  | 0.00433427 | 0.03315037 | SAG-related sequence SRS57                                     |
| TGME49_251470 | -1.01 | 7.05  | 0.00433563 | 0.03315037 | hypothetical protein                                           |
| TGME49_253960 | 1.10  | 5.35  | 0.00434544 | 0.03315694 | oxidoreductase, short chain dehydrogenase/reductase family     |
| TGME49_232750 | 0.95  | 6.52  | 0.00434431 | 0.03315694 | 23S rRNA (adenine(1618)-N(6))-methyltransferase, putative      |
| TGME49_254000 | 0.92  | 7.14  | 0.00437175 | 0.03332338 | hypothetical protein                                           |
| TGME49_237190 | 1.43  | 5.53  | 0.00438821 | 0.0333459  | hypothetical protein                                           |
| TGME49_269730 | -0.92 | 7.62  | 0.00438473 | 0.0333459  | myosin-light-chain kinase                                      |
| TGME49_202430 | -1.36 | 5.89  | 0.00439497 | 0.03336302 | hypothetical protein                                           |
| TGME49_225080 | 1.55  | 10.82 | 0.00443559 | 0.0336369  | ribosomal protein RPS18                                        |
| TGME49_231200 | 1.47  | 5.30  | 0.00444267 | 0.03365616 | hypothetical protein                                           |
| TGME49_262690 | 2.92  | 12.26 | 0.00446774 | 0.03381154 | ribosomal protein RPL27                                        |
| TGME49_272910 | 0.85  | 7.65  | 0.00450539 | 0.03406163 | T-complex protein 1 delta subunit                              |
| TGME49_311625 | -1.37 | 5.89  | 0.00451377 | 0.03409024 | WD domain, G-beta repeat-containing protein                    |
| TGME49_231180 | -2.31 | 5.84  | 0.00452938 | 0.03417327 | hypothetical protein                                           |
| TGME49_259570 | -1.51 | 5.08  | 0.00456137 | 0.03437961 | CMP/dCMP deaminase, zinc-binding, putative                     |
| TGME49_212310 | 0.98  | 9.06  | 0.00457683 | 0.03446109 | vacuolar ATP synthetase                                        |
| TGME49_237280 | -0.92 | 7.18  | 0.00458256 | 0.03446922 | TLD protein                                                    |
| TGME49_276220 | 0.97  | 6.04  | 0.00460593 | 0.03460987 | hypothetical protein                                           |
| TGME49_268680 | 0.90  | 6.98  | 0.00469509 | 0.03524408 | hypothetical protein                                           |
| TGME49_275420 | -1.14 | 6.14  | 0.0047073  | 0.0353     | histone lysine-specific demethylase LSD1/BHC110/KDMA1A         |
| TGME49_235140 | -0.88 | 7.38  | 0.00471836 | 0.03534715 | hypothetical protein                                           |
| TGME49_219750 | 0.84  | 8.70  | 0.00474225 | 0.03543795 | cytochrome c, putative                                         |
| TGME49_227830 | -1.02 | 6.68  | 0.00474483 | 0.03543795 | mitochondrial inner membrane translocase TIM44, putative       |
| TGME49_318650 | 0.85  | 8.08  | 0.00475372 | 0.03546859 | transhydrogenase                                               |
| TGME49_291620 | -0.92 | 6.76  | 0.00477651 | 0.03556698 | hypothetical protein                                           |
| TGME49_227570 | 0.90  | 6.79  | 0.00480145 | 0.03569856 | transmembrane amino acid transporter protein                   |
| TGME49_316660 | -1.10 | 6.57  | 0.00482512 | 0.03578513 | cullin family protein                                          |
| TGME49_207665 | -2.56 | 4.58  | 0.00482377 | 0.03578513 | kinesin motor domain-containing protein                        |
| TGME49_207120 | -1.46 | 5.34  | 0.0048485  | 0.0359225  | Sad1/UNC family protein                                        |
| TGME49_273595 | 1.50  | 5.44  | 0.00491084 | 0.03631182 | hypothetical protein                                           |
| TGME49_210360 | 1.17  | 5.56  | 0.0049735  | 0.03670188 | DEAD (Asp-Glu-Ala-Asp) box polypeptide 41 family protein       |
| TGME49_311160 | -0.88 | 7.00  | 0.00497017 | 0.03670188 | PWI domain-containing protein                                  |

|               |       |      |            |            |                                                                       |
|---------------|-------|------|------------|------------|-----------------------------------------------------------------------|
| TGME49_286580 | 0.92  | 7.96 | 0.00498245 | 0.03673134 | hypothetical protein                                                  |
| TGME49_280770 | 1.02  | 6.58 | 0.00501624 | 0.03692538 | regulator of chromosome condensation (RCC1) repeat-containing         |
| TGME49_217820 | -0.96 | 7.80 | 0.00502373 | 0.03692538 | PCI domain-containing protein                                         |
| TGME49_226020 | 0.95  | 8.77 | 0.00502921 | 0.03692906 | transporter, major facilitator family protein                         |
| TGME49_216230 | -0.92 | 6.77 | 0.0050387  | 0.03696209 | hypothetical protein                                                  |
| TGME49_253410 | 0.98  | 6.01 | 0.00505681 | 0.03701443 | hypothetical protein                                                  |
| TGME49_255660 | -1.12 | 6.20 | 0.00506082 | 0.03701443 | EF hand domain-containing protein                                     |
| TGME49_270120 | -1.15 | 6.25 | 0.00505196 | 0.03701443 | thioredoxin-like protein TLP1                                         |
| TGME49_205130 | -0.83 | 7.87 | 0.00507881 | 0.03710937 | hypothetical protein                                                  |
| TGME49_249410 | 1.07  | 5.80 | 0.00509453 | 0.03715099 | hypothetical protein                                                  |
| TGME49_209090 | -1.16 | 6.23 | 0.00513049 | 0.03737641 | proteasome maturation factor ump1 protein                             |
| TGME49_277760 | -0.91 | 7.01 | 0.00515085 | 0.0374879  | adenylosuccinate lyase, putative                                      |
| TGME49_211630 | -0.80 | 8.48 | 0.00516997 | 0.03759012 | hypothetical protein                                                  |
| TGME49_310950 | -0.80 | 7.88 | 0.00521663 | 0.0378922  | AP2 domain transcription factor AP2XI-3                               |
| TGME49_225240 | 0.91  | 6.65 | 0.00524457 | 0.03805783 | 50S ribosomal protein L13, putative                                   |
| TGME49_213010 | -1.19 | 7.01 | 0.00525518 | 0.03809746 | hypothetical protein                                                  |
| TGME49_204060 | -1.35 | 5.49 | 0.00526991 | 0.03812967 | SNARE domain-containing protein                                       |
| TGME49_227780 | 1.46  | 5.00 | 0.00529441 | 0.03826956 | hypothetical protein                                                  |
| TGME49_238230 | 0.96  | 5.98 | 0.00530521 | 0.03831024 | Ser/Thr phosphatase family protein                                    |
| TGME49_211030 | -0.85 | 8.08 | 0.0053339  | 0.03847989 | hypothetical protein                                                  |
| TGME49_228330 | -1.61 | 5.62 | 0.00535503 | 0.03859479 | NLI interacting factor family phosphatase                             |
| TGME49_310802 | -1.21 | 5.73 | 0.0053644  | 0.03862471 | CRAL/TRIO domain-containing protein                                   |
| TGME49_219590 | -1.13 | 6.71 | 0.00543186 | 0.0389799  | RuvB family 1 protein                                                 |
| TGME49_319600 | -1.15 | 5.74 | 0.00543276 | 0.0389799  | alpha-tubulin N-acetyltransferase, putative                           |
| TGME49_280410 | -0.91 | 6.63 | 0.00546897 | 0.03912811 | 3'5'-cyclic nucleotide phosphodiesterase domain-containing            |
| TGME49_301170 | -6.07 | 5.07 | 0.00547128 | 0.03912811 | SAG-related sequence SRS19D                                           |
| TGME49_235560 | 1.73  | 5.20 | 0.00549438 | 0.03925542 | hypothetical protein                                                  |
| TGME49_280750 | -0.98 | 6.42 | 0.00551256 | 0.03934736 | rudimentary enhancer, putative                                        |
| TGME49_254380 | -1.33 | 5.32 | 0.00551878 | 0.03935383 | ribosomal protein L11, putative                                       |
| TGME49_252280 | 1.08  | 5.98 | 0.00552617 | 0.03936864 | hypothetical protein                                                  |
| TGME49_230850 | -0.86 | 7.40 | 0.00553609 | 0.03940143 | hypothetical protein                                                  |
| TGME49_248690 | -1.36 | 5.60 | 0.00555775 | 0.03947977 | hypothetical protein                                                  |
| TGME49_278205 | -0.80 | 7.72 | 0.00558797 | 0.0396048  | hypothetical protein                                                  |
| TGME49_215640 | -0.99 | 6.80 | 0.00559139 | 0.0396048  | zinc finger, C3HC4 type (RING finger) domain-containing protein       |
| TGME49_202390 | -0.93 | 6.90 | 0.00564633 | 0.03995576 | S15 sporozoite-expressed protein                                      |
| TGME49_257685 | 0.90  | 7.00 | 0.00566822 | 0.04002038 | hypothetical protein                                                  |
| TGME49_228010 | -1.60 | 5.14 | 0.00566406 | 0.04002038 | hypothetical protein                                                  |
| TGME49_278060 | -1.66 | 5.81 | 0.00567707 | 0.04002038 | Mre11 DNA-binding domain-containing protein                           |
| TGME49_313200 | -1.67 | 5.25 | 0.00575654 | 0.04054204 | leucine rich repeat-containing protein                                |
| TGME49_257300 | -0.97 | 7.02 | 0.00577241 | 0.04060588 | hypothetical protein                                                  |
| TGME49_219190 | -1.06 | 6.13 | 0.00577657 | 0.04060588 | nuclear movement protein domain containing protein                    |
| TGME49_246178 | -1.17 | 6.54 | 0.00585277 | 0.04102479 | hypothetical protein                                                  |
| TGME49_248870 | -0.98 | 6.24 | 0.00587648 | 0.041152   | SNARE associated Golgi protein                                        |
| TGME49_213930 | -1.48 | 5.46 | 0.00589416 | 0.04123683 | 3' exoribonuclease family, domain 1 domain-containing protein         |
| TGME49_287515 | -1.69 | 4.85 | 0.00590333 | 0.04126206 | hypothetical protein                                                  |
| TGME49_297720 | -1.02 | 7.42 | 0.0059096  | 0.04126695 | trehalose-phosphatase                                                 |
| TGME49_251730 | -1.16 | 5.85 | 0.00592861 | 0.04135002 | hypothetical protein                                                  |
| TGME49_205200 | 0.92  | 6.26 | 0.00594215 | 0.04137519 | hypothetical protein                                                  |
| TGME49_213388 | -1.46 | 5.26 | 0.00595302 | 0.04137519 | hypothetical protein                                                  |
| TGME49_254480 | 1.45  | 5.50 | 0.00602032 | 0.04173191 | WD domain, G-beta repeat-containing protein                           |
| TGME49_238180 | -0.95 | 7.28 | 0.00604521 | 0.04181978 | 26S proteasome regulatory complex subunit, putative                   |
| TGME49_220470 | -1.04 | 6.96 | 0.00605177 | 0.04182611 | hypothetical protein                                                  |
| TGME49_218740 | 1.54  | 5.51 | 0.00608702 | 0.04199139 | membrane protein, putative                                            |
| TGME49_222110 | -1.24 | 6.57 | 0.00611209 | 0.04212511 | PUB domain-containing protein                                         |
| TGME49_236250 | -1.28 | 5.31 | 0.00612661 | 0.04216101 | regulator of chromosome condensation (RCC1) repeat-containing protein |
| TGME49_310230 | -1.14 | 6.60 | 0.00615478 | 0.04230128 | hypothetical protein                                                  |
| TGME49_256060 | -1.00 | 6.61 | 0.00619041 | 0.04250674 | nucleosome assembly protein (nap) protein                             |

|               |       |       |            |            |                                                               |
|---------------|-------|-------|------------|------------|---------------------------------------------------------------|
| TGME49_205250 | 0.96  | 9.50  | 0.00626427 | 0.04297404 | rhoprtry protein ROP18                                        |
| TGME49_240570 | 1.00  | 6.81  | 0.00632295 | 0.04333648 | hypothetical protein                                          |
| TGME49_312160 | 0.89  | 7.86  | 0.00633698 | 0.04339253 | hypothetical protein                                          |
| TGME49_315280 | -1.30 | 5.80  | 0.00638054 | 0.04365043 | hypothetical protein                                          |
| TGME49_256760 | -0.93 | 8.64  | 0.00638833 | 0.04366342 | pyruvate kinase PyK1                                          |
| TGME49_217400 | 1.51  | 6.47  | 0.00639882 | 0.04369481 | hypothetical protein                                          |
| TGME49_254470 | 0.87  | 9.17  | 0.00641415 | 0.04371889 | hypothetical protein                                          |
| TGME49_217770 | 0.82  | 6.54  | 0.00641184 | 0.04371889 | hypothetical protein                                          |
| TGME49_252210 | 1.25  | 10.38 | 0.00644226 | 0.04384183 | pentatricopeptide repeat domain-containing protein            |
| TGME49_306610 | -1.56 | 4.93  | 0.00644402 | 0.04384183 | 3' exoribonuclease family, domain 1 domain-containing protein |
| TGME49_308093 | 0.79  | 8.24  | 0.00646022 | 0.04391174 | rhoprtry kinase family protein (incomplete catalytic triad)   |
| TGME49_261460 | -1.01 | 7.09  | 0.00649329 | 0.04393498 | transcriptional elongation factor FACT80                      |
| TGME49_240910 | -1.09 | 6.41  | 0.00649062 | 0.04393498 | hypothetical protein                                          |
| TGME49_294180 | -1.26 | 5.80  | 0.00648307 | 0.04393498 | tRNA -methyltransferase family protein                        |
| TGME49_234900 | -0.85 | 7.30  | 0.00651263 | 0.0439855  | PHD-finger domain-containing protein                          |
| TGME49_214470 | -1.19 | 5.86  | 0.00650985 | 0.0439855  | Ulp1 protease family, C-terminal catalytic domain-containing  |
| TGME49_224070 | -1.28 | 5.80  | 0.0065297  | 0.04406061 | hypothetical protein                                          |
| TGME49_221670 | -0.81 | 7.54  | 0.00655712 | 0.04416518 | transcriptional elongation factor FACT140                     |
| TGME49_242010 | 1.26  | 5.35  | 0.00659851 | 0.04440361 | glucose inhibited division protein A subfamily protein        |
| TGME49_254090 | 1.09  | 6.12  | 0.00663691 | 0.04462146 | hypothetical protein                                          |
| TGME49_216910 | -1.01 | 6.32  | 0.00666042 | 0.04473893 | hypothetical protein                                          |
| TGME49_269438 | 1.09  | 6.27  | 0.00671232 | 0.04504672 | hypothetical protein                                          |
| TGME49_279430 | 1.00  | 6.42  | 0.0068092  | 0.04555988 | cwf18 pre-mRNA splicing factor protein                        |
| TGME49_275650 | 1.13  | 7.60  | 0.00688341 | 0.04590387 | hypothetical protein                                          |
| TGME49_225170 | -1.22 | 5.59  | 0.00696876 | 0.04643124 | hypothetical protein                                          |
| TGME49_286790 | -1.12 | 6.11  | 0.00700071 | 0.04651861 | nuclear factor NF2                                            |
| TGME49_295960 | -1.27 | 6.45  | 0.00699541 | 0.04651861 | hypothetical protein                                          |
| TGME49_233430 | 1.41  | 4.98  | 0.00701699 | 0.04652501 | hypothetical protein                                          |
| TGME49_253070 | 1.36  | 4.92  | 0.00702051 | 0.04652501 | hydrolase, TatD family protein                                |
| TGME49_249900 | 1.17  | 10.08 | 0.00701439 | 0.04652501 | adenine nucleotide translocator, putative                     |
| TGME49_273140 | -1.37 | 5.60  | 0.00703216 | 0.04656058 | radical SAM methylthiotransferase, MiaB/RimO family protein   |
| TGME49_231480 | 0.94  | 6.53  | 0.00710621 | 0.04700887 | GCN1, putative                                                |
| TGME49_321650 | -0.82 | 7.42  | 0.00714291 | 0.04720409 | hypothetical protein                                          |
| TGME49_319740 | -1.41 | 5.14  | 0.00714847 | 0.04720409 | transporter, major facilitator family protein                 |
| TGME49_201880 | 0.73  | 8.04  | 0.00717594 | 0.04734334 | hypothetical protein                                          |
| TGME49_204040 | 1.61  | 4.96  | 0.00720955 | 0.04752273 | hypothetical protein                                          |
| TGME49_266750 | 0.85  | 7.27  | 0.00728625 | 0.04790049 | transporter/permease protein, putative                        |
| TGME49_227150 | 0.87  | 7.65  | 0.00739765 | 0.04846634 | glutaredoxin, putative                                        |
| TGME49_291120 | -1.11 | 5.77  | 0.00739849 | 0.04846634 | trafficking protein mon1 subfamily protein                    |
| TGME49_285950 | -1.50 | 5.04  | 0.00750799 | 0.04909684 | hypothetical protein                                          |
| TGME49_239680 | 0.97  | 6.25  | 0.00752842 | 0.04918703 | hypothetical protein                                          |
| TGME49_213790 | -1.09 | 6.02  | 0.0075429  | 0.04923821 | hypothetical protein                                          |
| TGME49_318690 | 1.29  | 4.49  | 0.00756471 | 0.04933711 | RNA recognition motif-containing protein                      |
| TGME49_254290 | 1.08  | 5.58  | 0.00762164 | 0.04966466 | hypothetical protein                                          |

**Supplementary Table S5B: Differential expression analysis of *T. gondii* genes from MM6 cells infected with *T. gondii* EGS strain for 18 hours compared to *T. gondii* gene expression from MM6 cells infected with ME49 strain for 18 hours.**

| gene ID       | logFC<br>(EGS/ME49) | logCPM | PValue   | FDR      | Product Name                                                          |
|---------------|---------------------|--------|----------|----------|-----------------------------------------------------------------------|
| TGME49_232955 | 8.68                | 8.96   | 2.61E-67 | 1.94E-63 | hypothetical protein                                                  |
| TGME49_322200 | 8.34                | 6.25   | 2.98E-58 | 1.10E-54 | apocytochrome b, putative                                             |
| TGME49_323400 | 8.28                | 9.09   | 9.62E-52 | 2.38E-48 | cytochrome c oxidase subunit iii subfamily protein                    |
| TGME49_280570 | 5.19                | 7.23   | 1.69E-38 | 3.13E-35 | SAG-related sequence SRS35A                                           |
| TGME49_259115 | -5.11               | 7.48   | 3.58E-37 | 5.31E-34 | ABC1 family protein                                                   |
| TGME49_293790 | 5.43                | 5.45   | 6.30E-32 | 7.79E-29 | hypothetical protein                                                  |
| TGME49_330000 | 9.02                | 9.81   | 6.60E-31 | 6.11E-28 | cytochrome b                                                          |
| TGME49_291040 | 5.96                | 6.32   | 6.45E-31 | 6.11E-28 | lactate dehydrogenase LDH2                                            |
| TGME49_212940 | -10.97              | 6.33   | 6.99E-30 | 5.75E-27 | hypothetical protein                                                  |
| TGME49_255060 | 7.47                | 9.39   | 2.43E-27 | 1.80E-24 | cytochrome b(N-terminal)/b6/petB subfamily protein                    |
| TGME49_237130 | 8.26                | 9.77   | 1.06E-26 | 7.12E-24 | cytochrome b, putative                                                |
| TGME49_267020 | -4.42               | 7.23   | 2.86E-25 | 1.76E-22 | hypothetical protein                                                  |
| TGME49_259020 | 5.33                | 6.32   | 5.88E-24 | 3.11E-21 | bradyzoite antigen BAG1                                               |
| TGME49_216140 | 3.66                | 7.04   | 5.67E-24 | 3.11E-21 | tetratricopeptide repeat-containing protein                           |
| TGME49_299010 | 4.46                | 6.15   | 2.26E-23 | 1.12E-20 | hypothetical protein                                                  |
| TGME49_202970 | -5.95               | 7.16   | 5.94E-23 | 2.75E-20 | hypothetical protein                                                  |
| TGME49_252065 | 4.28                | 5.35   | 8.59E-23 | 3.74E-20 | KRUF family protein                                                   |
| TGME49_264240 | -10.43              | 5.73   | 7.44E-22 | 3.06E-19 | hypothetical protein                                                  |
| TGME49_301222 | 2.86                | 6.51   | 2.80E-21 | 1.09E-18 | DNA repair protein Rad4 domain-containing protein                     |
| TGME49_206550 | 2.98                | 5.45   | 1.91E-20 | 7.07E-18 | hypothetical protein                                                  |
| TGME49_312905 | -3.09               | 7.33   | 4.54E-20 | 1.60E-17 | hypothetical protein                                                  |
| TGME49_244700 | -2.91               | 7.42   | 9.89E-20 | 3.33E-17 | NAD(+)/NADH kinase domain-containing protein                          |
| TGME49_302055 | 10.62               | 5.01   | 6.21E-19 | 2.00E-16 | ribosomal protein RPS12                                               |
| TGME49_223660 | 2.65                | 7.24   | 1.73E-18 | 5.35E-16 | 50S ribosomal protein L4, putative                                    |
| TGME49_305460 | 2.65                | 7.39   | 8.61E-18 | 2.55E-15 | methionine aminopeptidase 2, putative                                 |
| TGME49_253330 | 3.85                | 7.81   | 1.37E-17 | 3.91E-15 | Rhoptry kinase family protein, truncated (incomplete catalytic triad) |
| TGME49_252070 | 3.75                | 4.72   | 3.21E-16 | 8.49E-14 | KRUF family protein                                                   |
| TGME49_252640 | 5.22                | 4.57   | 6.72E-16 | 1.68E-13 | P-type ATPase PMA1                                                    |
| TGME49_279340 | 2.37                | 6.65   | 6.79E-16 | 1.68E-13 | hypothetical protein                                                  |
| TGME49_226310 | -3.64               | 7.53   | 8.93E-16 | 2.13E-13 | zinc finger (CCCH type) motif-containing protein                      |
| TGME49_217530 | 3.78                | 4.70   | 1.28E-15 | 2.96E-13 | hypothetical protein                                                  |
| TGME49_280400 | -3.11               | 7.79   | 3.42E-15 | 7.67E-13 | hypothetical protein                                                  |
| TGME49_290580 | -3.63               | 6.26   | 5.02E-15 | 1.09E-12 | ATP-binding cassette G family transporter ABCG89                      |
| TGME49_301170 | -9.48               | 5.07   | 9.03E-15 | 1.91E-12 | SAG-related sequence SRS19D                                           |
| TGME49_209755 | 3.95                | 5.73   | 2.22E-14 | 4.58E-12 | hypothetical protein                                                  |
| TGME49_251180 | 3.13                | 5.76   | 4.01E-14 | 8.03E-12 | KRUF family protein                                                   |
| TGME49_233000 | -2.52               | 6.91   | 4.92E-14 | 9.35E-12 | KOW motif domain-containing protein                                   |
| TGME49_266950 | -2.61               | 6.64   | 4.81E-14 | 9.35E-12 | protein kinase, putative                                              |
| TGME49_254030 | 2.07                | 8.07   | 1.85E-13 | 3.34E-11 | zinc finger CDGSH-type domain-containing protein                      |
| TGME49_234460 | 2.80                | 6.80   | 2.13E-13 | 3.76E-11 | hypothetical protein                                                  |
| TGME49_263510 | -3.66               | 5.94   | 3.51E-13 | 6.05E-11 | Spc97 / Spc98 family protein                                          |
| TGME49_213010 | -2.88               | 7.01   | 3.94E-13 | 6.64E-11 | hypothetical protein                                                  |
| TGME49_213280 | 2.31                | 9.22   | 1.38E-12 | 2.23E-10 | SAG-related sequence SRS25                                            |
| TGME49_203720 | 2.05                | 7.96   | 1.38E-12 | 2.23E-10 | vitamin k epoxide reductase family protein                            |
| TGME49_235680 | -2.63               | 6.97   | 1.54E-12 | 2.39E-10 | peptidase M16 inactive domain-containing protein                      |
| TGME49_231960 | -3.35               | 6.35   | 1.55E-12 | 2.39E-10 | omega secalin, putative                                               |

|               |       |       |          |          |                                                                      |
|---------------|-------|-------|----------|----------|----------------------------------------------------------------------|
| TGME49_289350 | -3.12 | 6.16  | 1.70E-12 | 2.57E-10 | ATP-binding cassette G family transporter ABCG84                     |
| TGME49_275860 | 2.29  | 9.13  | 2.46E-12 | 3.64E-10 | hypothetical protein                                                 |
| TGME49_307770 | -2.38 | 6.88  | 2.85E-12 | 4.14E-10 | fumble protein                                                       |
| TGME49_312600 | 1.81  | 8.45  | 4.28E-12 | 6.10E-10 | heat shock protein HSP21                                             |
| TGME49_207210 | 3.26  | 6.03  | 7.41E-12 | 1.04E-09 | hypothetical protein                                                 |
| TGME49_299030 | 2.12  | 7.31  | 8.13E-12 | 1.12E-09 | RNA recognition motif 2 protein                                      |
| TGME49_311460 | -2.95 | 6.39  | 8.29E-12 | 1.12E-09 | hypothetical protein                                                 |
| TGME49_209940 | -2.26 | 6.74  | 1.27E-11 | 1.68E-09 | transporter/permease protein                                         |
| TGME49_208730 | 1.76  | 8.09  | 1.35E-11 | 1.75E-09 | microneme protein, putative                                          |
| TGME49_225555 | 1.82  | 8.72  | 1.93E-11 | 2.47E-09 | hypothetical protein                                                 |
| TGME49_247530 | 1.99  | 8.79  | 5.08E-11 | 6.38E-09 | hypothetical protein                                                 |
| TGME49_239270 | -2.30 | 7.52  | 7.09E-11 | 8.76E-09 | hypothetical protein                                                 |
| TGME49_297780 | -2.60 | 6.48  | 9.04E-11 | 1.10E-08 | ATPase/histidine kinase/DNA gyrase B/HSP90 domain-containing protein |
| TGME49_297495 | -9.14 | 4.96  | 1.04E-10 | 1.24E-08 | hypothetical protein                                                 |
| TGME49_283540 | 1.98  | 8.44  | 1.17E-10 | 1.35E-08 | hypothetical protein                                                 |
| TGME49_277270 | 3.04  | 9.46  | 1.52E-10 | 1.73E-08 | NTPase II                                                            |
| TGME49_210210 | -9.04 | 4.47  | 1.81E-10 | 2.03E-08 | hypothetical protein                                                 |
| TGME49_213255 | -2.66 | 5.87  | 1.88E-10 | 2.08E-08 | hypothetical protein                                                 |
| TGME49_301250 | 8.53  | 14.41 | 2.03E-10 | 2.21E-08 | hypothetical protein                                                 |
| TGME49_264260 | -4.82 | 5.63  | 2.16E-10 | 2.32E-08 | hypothetical protein                                                 |
| TGME49_315100 | 5.72  | 4.60  | 2.38E-10 | 2.52E-08 | hypothetical protein                                                 |
| TGME49_321360 | 1.69  | 7.60  | 2.52E-10 | 2.63E-08 | clustered-asparagine-rich protein                                    |
| TGME49_280490 | -1.99 | 7.44  | 4.45E-10 | 4.58E-08 | U-box domain-containing protein                                      |
| TGME49_299080 | 1.84  | 6.87  | 4.77E-10 | 4.84E-08 | VTC domain-containing protein                                        |
| TGME49_258720 | 1.93  | 6.22  | 5.33E-10 | 5.34E-08 | Ubiquitin family protein, putative                                   |
| TGME49_279350 | 2.79  | 5.67  | 5.92E-10 | 5.77E-08 | hypothetical protein                                                 |
| TGME49_213067 | 1.98  | 7.89  | 5.99E-10 | 5.77E-08 | hypothetical protein                                                 |
| TGME49_295950 | 2.39  | 5.58  | 6.25E-10 | 5.93E-08 | KRUF family protein                                                  |
| TGME49_233925 | 10.32 | 11.32 | 7.49E-10 | 6.85E-08 | hypothetical protein                                                 |
| TGME49_221840 | 3.66  | 4.58  | 7.45E-10 | 6.85E-08 | hypothetical protein                                                 |
| TGME49_301890 | -3.19 | 6.19  | 7.31E-10 | 6.85E-08 | Toxoplasma gondii family B protein                                   |
| TGME49_220240 | 2.02  | 8.76  | 8.56E-10 | 7.74E-08 | hypothetical protein                                                 |
| TGME49_306688 | -3.91 | 4.99  | 1.12E-09 | 9.74E-08 | hypothetical protein                                                 |
| TGME49_238140 | -2.18 | 6.40  | 1.15E-09 | 9.92E-08 | hypothetical protein                                                 |
| TGME49_263820 | -2.10 | 6.58  | 1.28E-09 | 1.09E-07 | DEAD/DEAH box helicase domain-containing protein                     |
| TGME49_226380 | 1.80  | 8.18  | 1.42E-09 | 1.19E-07 | hypothetical protein                                                 |
| TGME49_240220 | -2.27 | 6.67  | 1.87E-09 | 1.56E-07 | hypothetical protein                                                 |
| TGME49_216680 | -2.19 | 7.25  | 2.37E-09 | 1.95E-07 | ankyrin repeat-containing protein                                    |
| TGME49_240060 | 2.18  | 8.72  | 2.40E-09 | 1.96E-07 | hypothetical protein                                                 |
| TGME49_258790 | -2.03 | 7.15  | 3.28E-09 | 2.64E-07 | zinc finger, C3HC4 type (RING finger) domain-containing protein      |
| TGME49_214410 | 1.67  | 7.48  | 3.34E-09 | 2.66E-07 | hypothetical protein                                                 |
| TGME49_253690 | 1.66  | 8.81  | 3.96E-09 | 3.12E-07 | hypothetical protein                                                 |
| TGME49_287470 | 2.95  | 4.97  | 4.41E-09 | 3.41E-07 | hypothetical protein                                                 |
| TGME49_268225 | -9.99 | 6.07  | 4.47E-09 | 3.41E-07 | hypothetical protein                                                 |
| TGME49_233760 | -2.58 | 6.40  | 4.85E-09 | 3.67E-07 | hypothetical protein                                                 |
| TGME49_312140 | -4.67 | 8.68  | 4.95E-09 | 3.71E-07 | hypothetical protein                                                 |
| TGME49_254770 | 1.66  | 6.49  | 5.22E-09 | 3.87E-07 | Ser/Thr phosphatase family protein                                   |
| TGME49_260250 | -2.61 | 6.13  | 6.11E-09 | 4.48E-07 | cyclin domain protein, cyclin H family protein                       |
| TGME49_251170 | 2.24  | 5.46  | 7.33E-09 | 5.32E-07 | KRUF family protein                                                  |
| TGME49_306338 | -2.76 | 5.70  | 1.24E-08 | 8.80E-07 | dynein gamma chain, flagellar outer arm, putative                    |

|               |       |       |          |          |                                                                    |
|---------------|-------|-------|----------|----------|--------------------------------------------------------------------|
| TGME49_228160 | 1.73  | 7.00  | 1.34E-08 | 9.37E-07 | acid phosphatase                                                   |
| TGME49_244260 | -3.96 | 4.83  | 1.56E-08 | 1.06E-06 | hypothetical protein                                               |
| TGME49_278060 | -3.05 | 5.81  | 2.28E-08 | 1.54E-06 | Mre11 DNA-binding domain-containing protein                        |
| TGME49_297840 | -1.92 | 7.30  | 2.44E-08 | 1.62E-06 | DNA primase, large subunit                                         |
| TGME49_202280 | -3.15 | 5.61  | 2.45E-08 | 1.62E-06 | WD domain, G-beta repeat-containing protein                        |
| TGME49_271935 | 2.09  | 6.37  | 2.98E-08 | 1.95E-06 | hypothetical protein                                               |
| TGME49_204050 | 2.64  | 10.28 | 3.06E-08 | 1.99E-06 | subtilisin SUB1                                                    |
| TGME49_254050 | 1.59  | 6.49  | 3.19E-08 | 2.05E-06 | optic atrophy 3 protein (opa3) protein                             |
| TGME49_298060 | -2.83 | 5.46  | 3.31E-08 | 2.11E-06 | Toxoplasma gondii family C protein                                 |
| TGME49_202020 | 2.74  | 7.60  | 3.42E-08 | 2.17E-06 | DnAK-TPR                                                           |
| TGME49_275460 | 2.53  | 6.68  | 3.68E-08 | 2.31E-06 | hypothetical protein                                               |
| TGME49_200310 | 1.64  | 7.75  | 3.99E-08 | 2.48E-06 | hypothetical protein                                               |
| TGME49_240880 | -2.58 | 5.67  | 4.05E-08 | 2.50E-06 | hypothetical protein                                               |
| TGME49_315885 | 5.94  | 9.43  | 4.09E-08 | 2.51E-06 | glycosyltransferase, putative                                      |
| TGME49_253600 | 2.31  | 6.44  | 4.19E-08 | 2.54E-06 | hypothetical protein                                               |
| TGME49_205210 | -5.32 | 4.86  | 4.66E-08 | 2.80E-06 | hypothetical protein                                               |
| TGME49_253960 | 2.02  | 5.35  | 4.87E-08 | 2.91E-06 | oxidoreductase, short chain dehydrogenase/reductase family protein |
| TGME49_227810 | 1.65  | 8.47  | 5.11E-08 | 3.01E-06 | rhoptry kinase family protein ROP11 (incomplete catalytic triad)   |
| TGME49_273870 | -1.83 | 7.40  | 5.10E-08 | 3.01E-06 | SWI2/SNF2 ISWI-like (AT hook)                                      |
| TGME49_251540 | 1.64  | 9.00  | 5.52E-08 | 3.22E-06 | dense granule protein GRA9                                         |
| TGME49_260430 | 2.69  | 4.69  | 5.60E-08 | 3.22E-06 | hypothetical protein                                               |
| TGME49_322000 | -2.38 | 6.91  | 5.75E-08 | 3.28E-06 | myosin-light-chain kinase                                          |
| TGME49_236670 | 2.12  | 5.44  | 6.01E-08 | 3.40E-06 | hypothetical protein                                               |
| TGME49_254120 | 1.77  | 8.64  | 6.13E-08 | 3.44E-06 | autophagy-related protein 8 atg8, putative                         |
| TGME49_254520 | 1.57  | 7.27  | 6.74E-08 | 3.73E-06 | mediator complex subunit MED11                                     |
| TGME49_208440 | 1.46  | 8.08  | 7.24E-08 | 3.94E-06 | hypothetical protein                                               |
| TGME49_316470 | -2.66 | 5.82  | 7.20E-08 | 3.94E-06 | hypothetical protein                                               |
| TGME49_221675 | 1.51  | 7.42  | 7.90E-08 | 4.27E-06 | hypothetical protein                                               |
| TGME49_217555 | 1.38  | 7.97  | 8.00E-08 | 4.29E-06 | hypothetical protein                                               |
| TGME49_217020 | -2.26 | 6.14  | 8.56E-08 | 4.56E-06 | ATPase, AFG1 family protein                                        |
| TGME49_300048 | 1.65  | 6.93  | 9.20E-08 | 4.87E-06 | hypothetical protein                                               |
| TGME49_218750 | -2.82 | 5.38  | 9.62E-08 | 5.05E-06 | hypothetical protein                                               |
| TGME49_312520 | -2.75 | 5.63  | 1.05E-07 | 5.49E-06 | tRNA dimethylallyltransferase                                      |
| TGME49_253470 | 1.48  | 7.33  | 1.14E-07 | 5.91E-06 | alveolin domain containing intermediate filament IMC13             |
| TGME49_234530 | 1.69  | 7.13  | 1.63E-07 | 8.35E-06 | hypothetical protein                                               |
| TGME49_233870 | 1.82  | 6.13  | 1.75E-07 | 8.87E-06 | hypothetical protein                                               |
| TGME49_267420 | 1.43  | 8.24  | 1.76E-07 | 8.88E-06 | mago nashi family protein 2, putative                              |
| TGME49_290150 | -2.18 | 6.93  | 1.92E-07 | 9.60E-06 | hypothetical protein                                               |
| TGME49_316250 | 1.44  | 8.64  | 1.94E-07 | 9.67E-06 | hypothetical protein                                               |
| TGME49_205680 | 1.88  | 7.62  | 1.98E-07 | 9.79E-06 | hypothetical protein                                               |
| TGME49_215430 | 4.60  | 9.38  | 2.10E-07 | 1.03E-05 | hypothetical protein                                               |
| TGME49_254800 | 2.05  | 5.96  | 2.21E-07 | 1.08E-05 | hypothetical protein                                               |
| TGME49_275640 | 1.61  | 6.96  | 2.31E-07 | 1.11E-05 | hypothetical protein                                               |
| TGME49_261750 | -1.87 | 6.89  | 2.30E-07 | 1.11E-05 | rhoptry neck protein RON10                                         |
| TGME49_253750 | 1.65  | 7.45  | 2.61E-07 | 1.25E-05 | PLU-1 family protein                                               |
| TGME49_254080 | 1.48  | 7.77  | 2.93E-07 | 1.38E-05 | metal cation transporter, ZIP family protein                       |
| TGME49_208740 | 2.17  | 9.78  | 2.98E-07 | 1.40E-05 | microneme protein, putative                                        |
| TGME49_274070 | -3.35 | 5.15  | 3.28E-07 | 1.53E-05 | ThiF family protein                                                |
| TGME49_257350 | 1.40  | 8.19  | 3.63E-07 | 1.67E-05 | eukaryotic translation initiation factor, putative                 |

|               |       |       |          |          |                                                                                         |
|---------------|-------|-------|----------|----------|-----------------------------------------------------------------------------------------|
| TGME49_315130 | 1.51  | 6.70  | 3.70E-07 | 1.69E-05 | L-isoaspartyl protein carboxyl methyltransferase family protein                         |
| TGME49_240650 | -1.59 | 7.64  | 4.05E-07 | 1.84E-05 | coatomer protein complex, subunit alpha, putative                                       |
| TGME49_272410 | 3.54  | 8.19  | 4.08E-07 | 1.84E-05 | phosphogluconate dehydrogenase (decarboxylating), NAD binding domain-containing protein |
| TGME49_319540 | -2.49 | 5.83  | 4.12E-07 | 1.85E-05 | hypothetical protein                                                                    |
| TGME49_221320 | 2.37  | 9.10  | 4.42E-07 | 1.97E-05 | acetyl-CoA carboxylase ACC1                                                             |
| TGME49_260480 | 2.05  | 5.50  | 5.22E-07 | 2.27E-05 | leucine rich repeat-containing protein                                                  |
| TGME49_203730 | -2.40 | 5.79  | 5.21E-07 | 2.27E-05 | hypothetical protein                                                                    |
| TGME49_297910 | -3.38 | 5.31  | 5.23E-07 | 2.27E-05 | hypothetical protein                                                                    |
| TGME49_286928 | -3.10 | 6.04  | 5.56E-07 | 2.39E-05 | hypothetical protein                                                                    |
| TGME49_236270 | -3.34 | 5.33  | 5.83E-07 | 2.50E-05 | hypothetical protein                                                                    |
| TGME49_207960 | -2.30 | 6.09  | 5.90E-07 | 2.51E-05 | hypothetical protein                                                                    |
| TGME49_205330 | 1.39  | 7.80  | 6.04E-07 | 2.56E-05 | hypothetical protein                                                                    |
| TGME49_262050 | 2.31  | 9.30  | 6.18E-07 | 2.60E-05 | rhoptry kinase family protein ROP39                                                     |
| TGME49_239250 | -1.47 | 6.95  | 6.25E-07 | 2.62E-05 | diacylglycerol kinase, putative                                                         |
| TGME49_255290 | -3.89 | 4.89  | 6.29E-07 | 2.62E-05 | hypothetical protein                                                                    |
| TGME49_312270 | 1.48  | 8.08  | 6.35E-07 | 2.63E-05 | rhoptry protein ROP13                                                                   |
| TGME49_268860 | 4.31  | 4.79  | 6.40E-07 | 2.63E-05 | enolase 1                                                                               |
| TGME49_252500 | 1.38  | 7.79  | 6.52E-07 | 2.67E-05 | polo kinase                                                                             |
| TGME49_300010 | -4.45 | 5.19  | 7.72E-07 | 3.14E-05 | hypothetical protein                                                                    |
| TGME49_267460 | 2.48  | 4.67  | 8.98E-07 | 3.62E-05 | AP2 domain transcription factor AP2IX-1                                                 |
| TGME49_320005 | -2.78 | 5.44  | 9.38E-07 | 3.76E-05 | hypothetical protein                                                                    |
| TGME49_290300 | 1.44  | 7.98  | 9.56E-07 | 3.79E-05 | hypothetical protein                                                                    |
| TGME49_240840 | -2.01 | 5.91  | 9.54E-07 | 3.79E-05 | histone lysine demethylase JmjC NO66                                                    |
| TGME49_285190 | -1.76 | 6.63  | 9.68E-07 | 3.81E-05 | zinc finger, C3HC4 type (RING finger) domain-containing protein                         |
| TGME49_279450 | -8.01 | 4.57  | 9.93E-07 | 3.89E-05 | adenylosuccinate synthetase, putative                                                   |
| TGME49_306895 | 1.61  | 7.00  | 1.01E-06 | 3.93E-05 | hypothetical protein                                                                    |
| TGME49_202780 | 1.32  | 7.70  | 1.01E-06 | 3.93E-05 | rhoptry kinase family protein ROP25                                                     |
| TGME49_225130 | -3.12 | 5.10  | 1.07E-06 | 4.13E-05 | hypothetical protein                                                                    |
| TGME49_262590 | -3.61 | 5.21  | 1.09E-06 | 4.17E-05 | hypothetical protein                                                                    |
| TGME49_244370 | 6.57  | 11.45 | 1.16E-06 | 4.41E-05 | TDC1, putative                                                                          |
| TGME49_276930 | 1.44  | 8.13  | 1.16E-06 | 4.42E-05 | hypothetical protein                                                                    |
| TGME49_260520 | 1.94  | 6.90  | 1.17E-06 | 4.43E-05 | hypothetical protein                                                                    |
| TGME49_201400 | -2.11 | 5.98  | 1.24E-06 | 4.64E-05 | Sin3-associated polypeptide SAP18                                                       |
| TGME49_305860 | -1.42 | 7.96  | 1.26E-06 | 4.67E-05 | calcium-dependent protein kinase CDPK3                                                  |
| TGME49_312330 | 1.73  | 7.92  | 1.27E-06 | 4.68E-05 | hypothetical protein                                                                    |
| TGME49_301160 | -3.93 | 4.57  | 1.27E-06 | 4.68E-05 | SAG-related sequence SRS19C                                                             |
| TGME49_215940 | -2.34 | 6.61  | 1.29E-06 | 4.70E-05 | Acetyl-coenzyme A transporter, putative                                                 |
| TGME49_293740 | 1.33  | 8.81  | 1.36E-06 | 4.92E-05 | hypothetical protein                                                                    |
| TGME49_211440 | -1.86 | 6.23  | 1.38E-06 | 4.96E-05 | hypothetical protein                                                                    |
| TGME49_244120 | -2.11 | 5.76  | 1.38E-06 | 4.96E-05 | hypothetical protein                                                                    |
| TGME49_226100 | -3.82 | 5.42  | 1.38E-06 | 4.96E-05 | haloacid dehalogenase family hydrolase domain-containing protein                        |
| TGME49_253290 | 1.29  | 7.51  | 1.45E-06 | 5.15E-05 | valyl-tRNA synthetase                                                                   |
| TGME49_254660 | 1.43  | 6.61  | 1.48E-06 | 5.24E-05 | ankyrin repeat-containing protein                                                       |
| TGME49_252190 | 2.25  | 5.74  | 1.51E-06 | 5.27E-05 | KRUF family protein                                                                     |
| TGME49_288860 | -1.61 | 6.48  | 1.51E-06 | 5.27E-05 | RuvB family 2 protein                                                                   |
| TGME49_292975 | -1.81 | 5.91  | 1.56E-06 | 5.40E-05 | hypothetical protein                                                                    |
| TGME49_254930 | 1.37  | 7.07  | 1.57E-06 | 5.41E-05 | hypothetical protein                                                                    |
| TGME49_294400 | -2.54 | 6.97  | 1.66E-06 | 5.70E-05 | hypothetical protein                                                                    |

|               |       |      |          |            |                                                                     |
|---------------|-------|------|----------|------------|---------------------------------------------------------------------|
| TGME49_253180 | 2.53  | 8.08 | 1.70E-06 | 5.79E-05   | hypothetical protein                                                |
| TGME49_215930 | -7.79 | 4.44 | 1.78E-06 | 6.04E-05   | mediator complex subunit MED21                                      |
| TGME49_275430 | -2.15 | 5.84 | 1.79E-06 | 6.05E-05   | hypothetical protein                                                |
| TGME49_214580 | -5.07 | 4.76 | 1.80E-06 | 6.07E-05   | tetratricopeptide repeat-containing protein                         |
| TGME49_254365 | 1.40  | 7.70 | 1.85E-06 | 6.20E-05   | phosphatidate cytidyltransferase                                    |
| TGME49_211220 | -1.98 | 5.90 | 1.97E-06 | 6.57E-05   | hypothetical protein                                                |
| TGME49_297492 | -4.59 | 4.52 | 2.01E-06 | 6.68E-05   | hypothetical protein                                                |
| TGME49_264840 | -2.86 | 4.93 | 2.08E-06 | 6.87E-05   | ATP-dependent DNA helicase, RecQ family protein                     |
| TGME49_253100 | 1.26  | 7.21 | 2.26E-06 | 7.45E-05   | hypothetical protein                                                |
| TGME49_235630 | 1.28  | 6.97 | 2.28E-06 | 7.49E-05   | hypothetical protein                                                |
| TGME49_252430 | 1.30  | 7.44 | 2.41E-06 | 7.80E-05   | hypothetical protein                                                |
| TGME49_258030 | -2.70 | 5.92 | 2.50E-06 | 8.06E-05   | DNA polymerase                                                      |
| TGME49_299210 | 1.80  | 8.19 | 2.52E-06 | 8.09E-05   | CTP synthase                                                        |
| TGME49_277710 | -1.81 | 6.74 | 2.70E-06 | 8.61E-05   | hypothetical protein                                                |
| TGME49_254710 | 1.44  | 7.19 | 2.74E-06 | 8.70E-05   | serine esterase (DUF676) protein                                    |
| TGME49_277510 | -1.70 | 6.50 | 3.26E-06 | 0.00010203 | cytoplasmic dynein intermediate chain                               |
| TGME49_247410 | 1.28  | 7.58 | 3.38E-06 | 0.00010527 | hypothetical protein                                                |
| TGME49_293430 | 1.33  | 8.30 | 3.40E-06 | 0.00010537 | hypothetical protein                                                |
| TGME49_246200 | -2.81 | 5.02 | 3.55E-06 | 0.00010953 | zinc finger (CCCH type) motif-containing protein                    |
| TGME49_262730 | 1.38  | 8.05 | 3.58E-06 | 0.00011004 | rhoGTPase protein ROP16                                             |
| TGME49_259010 | -1.82 | 6.56 | 3.62E-06 | 0.00011068 | vacuolar ATP synthase subunit d, putative                           |
| TGME49_258230 | 2.52  | 5.43 | 3.74E-06 | 0.00011398 | rhoGTPase kinase family protein ROP20                               |
| TGME49_278830 | -1.44 | 8.64 | 3.80E-06 | 0.00011543 | glucose-6-phosphate 1-dehydrogenase                                 |
| TGME49_213710 | -1.86 | 6.17 | 3.96E-06 | 0.00011953 | WD domain, G-beta repeat-containing protein                         |
| TGME49_217420 | -2.47 | 5.56 | 3.98E-06 | 0.00011953 | hypothetical protein                                                |
| TGME49_254720 | 2.04  | 9.40 | 4.29E-06 | 0.00012772 | dense granule protein GRA8                                          |
| TGME49_275870 | 1.90  | 5.25 | 4.59E-06 | 0.00013607 | tubulin/FtsZ family, GTPase domain-containing protein               |
| TGME49_316255 | 1.20  | 7.55 | 4.81E-06 | 0.00014192 | hypothetical protein                                                |
| TGME49_263785 | -3.00 | 4.86 | 4.87E-06 | 0.00014322 | phosphatidate cytidyltransferase                                    |
| TGME49_215700 | -1.84 | 6.21 | 4.91E-06 | 0.00014372 | phosphatidylinositol 3- and 4-kinase                                |
| TGME49_240250 | -1.40 | 7.48 | 5.17E-06 | 0.0001496  | macro domain-containing protein                                     |
| TGME49_319580 | -2.72 | 5.43 | 5.17E-06 | 0.0001496  | hypothetical protein                                                |
| TGME49_246978 | -2.84 | 5.37 | 5.28E-06 | 0.00015214 | hypothetical protein                                                |
| TGME49_204270 | -1.92 | 6.40 | 5.86E-06 | 0.00016831 | hypothetical protein                                                |
| TGME49_262780 | -1.80 | 6.39 | 6.30E-06 | 0.00017958 | FHA domain-containing protein                                       |
| TGME49_219832 | -2.64 | 5.42 | 6.46E-06 | 0.0001826  | cyclin-dependent kinase regulatory subunit protein                  |
| TGME49_226755 | 1.60  | 6.33 | 7.15E-06 | 0.00019991 | 3'-5'-cyclic nucleotide phosphodiesterase domain-containing protein |
| TGME49_217951 | -2.00 | 6.01 | 7.13E-06 | 0.00019991 | hypothetical protein                                                |
| TGME49_298830 | 2.69  | 4.79 | 7.21E-06 | 0.00020085 | hypothetical protein                                                |
| TGME49_309990 | 1.37  | 6.25 | 7.36E-06 | 0.00020346 | hypothetical protein                                                |
| TGME49_257180 | -2.08 | 5.94 | 7.34E-06 | 0.00020346 | RecF/RecN/SMC N terminal domain-containing protein                  |
| TGME49_295935 | 1.37  | 9.03 | 7.39E-06 | 0.00020354 | KRUF family protein                                                 |
| TGME49_222040 | -2.83 | 5.45 | 7.45E-06 | 0.00020453 | Ran-interacting Mog1 protein                                        |
| TGME49_312310 | -2.41 | 5.48 | 7.49E-06 | 0.00020476 | ATPase, AAA family protein                                          |
| TGME49_225290 | 2.97  | 4.81 | 7.85E-06 | 0.00021394 | GDA1/CD39 (nucleoside phosphatase) family protein                   |
| TGME49_307650 | -1.81 | 6.17 | 7.96E-06 | 0.00021589 | uracil-DNA glycosylase                                              |
| TGME49_263730 | -1.66 | 6.51 | 8.06E-06 | 0.00021807 | FAD-dependent glycerol-3-phosphate dehydrogenase                    |
| TGME49_223040 | 1.48  | 7.92 | 8.44E-06 | 0.00022586 | hypothetical protein                                                |



|               |       |       |          |            |                                                                 |
|---------------|-------|-------|----------|------------|-----------------------------------------------------------------|
| TGME49_263100 | -2.14 | 5.60  | 8.41E-06 | 0.00022586 | hypothetical protein                                            |
| TGME49_313100 | -2.51 | 5.89  | 8.43E-06 | 0.00022586 | signal recognition particle SRP54 protein                       |
| TGME49_290600 | 6.38  | 12.08 | 8.52E-06 | 0.00022711 | succinyl-CoA-synthetase alpha SCSA                              |
| TGME49_225930 | 1.14  | 8.16  | 8.68E-06 | 0.0002304  | triose-phosphate isomerase TPI-I                                |
| TGME49_248990 | 1.22  | 8.48  | 9.31E-06 | 0.00024537 | hypothetical protein                                            |
| TGME49_269690 | 1.16  | 7.76  | 9.44E-06 | 0.00024808 | hypothetical protein                                            |
| TGME49_280560 | -1.50 | 6.83  | 9.51E-06 | 0.00024893 | selenide, water dikinase                                        |
| TGME49_260210 | -2.82 | 5.25  | 9.98E-06 | 0.00025842 | DnaI domain-containing protein                                  |
| TGME49_213635 | 2.45  | 5.03  | 1.01E-05 | 0.00026178 | hypothetical protein                                            |
| TGME49_310970 | -1.43 | 7.06  | 1.03E-05 | 0.00026406 | hypothetical protein                                            |
| TGME49_233680 | -2.92 | 4.92  | 1.10E-05 | 0.00028088 | nuclear movement family protein                                 |
| TGME49_278510 | -1.43 | 8.05  | 1.10E-05 | 0.0002816  | protein phosphatase 2C domain-containing protein                |
| TGME49_323100 | 1.64  | 6.90  | 1.22E-05 | 0.00030956 | hypothetical protein                                            |
| TGME49_242240 | -2.54 | 5.94  | 1.29E-05 | 0.00032624 | rhoptry kinase family protein ROP19A                            |
| TGME49_316710 | 1.24  | 7.47  | 1.30E-05 | 0.00032698 | hypothetical protein                                            |
| TGME49_229440 | -1.88 | 6.25  | 1.32E-05 | 0.00033145 | zinc finger, C3HC4 type (RING finger) domain-containing protein |
| TGME49_215540 | -8.70 | 4.96  | 1.36E-05 | 0.00034055 | hypothetical protein                                            |
| TGME49_223910 | -1.53 | 7.08  | 1.40E-05 | 0.00034744 | acyltransferase domain-containing protein                       |
| TGME49_247930 | -2.87 | 5.11  | 1.39E-05 | 0.00034744 | SNARE domain-containing protein                                 |
| TGME49_290700 | 1.27  | 7.87  | 1.46E-05 | 0.0003627  | hypothetical protein                                            |
| TGME49_239810 | 1.60  | 5.96  | 1.52E-05 | 0.00037498 | hypothetical protein                                            |
| TGME49_292110 | 1.84  | 6.61  | 1.56E-05 | 0.00038434 | formate/nitrite transporter protein                             |
| TGME49_214400 | 1.71  | 4.87  | 1.69E-05 | 0.00041128 | hypothetical protein                                            |
| TGME49_259530 | -1.62 | 6.38  | 1.73E-05 | 0.0004191  | GalNac                                                          |
| TGME49_288400 | -1.81 | 6.11  | 1.74E-05 | 0.00042041 | LETM1 family protein                                            |
| TGME49_243410 | -1.79 | 6.18  | 1.78E-05 | 0.00042769 | tetratricopeptide repeat-containing protein                     |
| TGME49_305160 | 3.04  | 4.53  | 1.80E-05 | 0.00043138 | histone H2Ba                                                    |
| TGME49_266100 | 1.33  | 6.81  | 1.85E-05 | 0.00044017 | rhoptry kinase family protein ROP41                             |
| TGME49_224220 | -1.73 | 6.62  | 1.92E-05 | 0.00045509 | serine/threonine-protein phosphatase PP2A catalytic subunit     |
| TGME49_263710 | -1.68 | 6.20  | 1.94E-05 | 0.00045757 | acyl-CoA:cholesterol acyltransferase alpha ACAT1-alpha          |
| TGME49_214170 | -2.00 | 5.90  | 1.94E-05 | 0.00045757 | hypothetical protein                                            |
| TGME49_321640 | -2.03 | 6.04  | 1.96E-05 | 0.00046214 | cell division protein CDC48AP                                   |
| TGME49_269180 | -1.20 | 7.79  | 2.05E-05 | 0.00048165 | MIF4G domain-containing protein                                 |
| TGME49_276220 | 1.35  | 6.04  | 2.14E-05 | 0.00050091 | hypothetical protein                                            |
| TGME49_253440 | 1.17  | 8.62  | 2.16E-05 | 0.00050272 | cell-cycle-associated protein kinase SRPK, putative             |
| TGME49_219520 | -1.34 | 7.45  | 2.17E-05 | 0.00050379 | histone arginine methyltransferase PRMT1                        |
| TGME49_296121 | 1.48  | 7.18  | 2.27E-05 | 0.00052443 | hypothetical protein                                            |
| TGME49_255510 | -1.31 | 7.27  | 2.35E-05 | 0.00054113 | ankyrin repeat-containing protein                               |
| TGME49_253140 | 1.52  | 5.83  | 2.44E-05 | 0.00055545 | hypothetical protein                                            |
| TGME49_316270 | 1.40  | 6.15  | 2.44E-05 | 0.00055545 | Rab geranylgeranyl transferase type II beta subunit, putative   |
| TGME49_207430 | -1.84 | 6.38  | 2.44E-05 | 0.00055545 | ATP-dependent RNA helicase DDX1, putative                       |
| TGME49_315280 | -1.86 | 5.80  | 2.48E-05 | 0.00056212 | hypothetical protein                                            |
| TGME49_212090 | 1.15  | 6.72  | 2.53E-05 | 0.00057222 | hypothetical protein                                            |
| TGME49_285870 | 1.32  | 9.13  | 2.63E-05 | 0.0005917  | SAG-related sequence SRS20A                                     |
| TGME49_268230 | -3.64 | 5.64  | 2.67E-05 | 0.00059853 | hypothetical protein                                            |
| TGME49_289540 | 1.20  | 7.57  | 2.69E-05 | 0.00060174 | hypothetical protein                                            |
| TGME49_314070 | 1.29  | 6.15  | 2.76E-05 | 0.00061523 | hypothetical protein                                            |
| TGME49_246130 | 1.27  | 7.99  | 2.78E-05 | 0.00061523 | serpin (serine proteinase inhibitor) superfamily protein        |

|               |       |       |          |            |                                                                |
|---------------|-------|-------|----------|------------|----------------------------------------------------------------|
| TGME49_255340 | -1.77 | 5.95  | 2.78E-05 | 0.00061523 | tetratricopeptide repeat-containing protein                    |
| TGME49_263740 | -1.88 | 5.41  | 2.77E-05 | 0.00061523 | ABC transporter transmembrane region domain-containing protein |
| TGME49_233130 | 2.06  | 5.01  | 2.88E-05 | 0.0006334  | nucleoside transporter protein                                 |
| TGME49_253860 | 1.25  | 6.69  | 2.88E-05 | 0.0006334  | Tyrosine kinase-like (TKL) protein                             |
| TGME49_260190 | -1.57 | 6.16  | 2.94E-05 | 0.00064486 | microneme protein MIC13                                        |
| TGME49_254690 | 1.25  | 7.81  | 3.09E-05 | 0.00067562 | phospholipase/carboxylesterase                                 |
| TGME49_240700 | -1.71 | 6.20  | 3.18E-05 | 0.00069247 | ubiquitin family protein                                       |
| TGME49_203540 | 1.51  | 7.63  | 3.19E-05 | 0.00069365 | RNA binding protein, putative                                  |
| TGME49_276920 | -1.63 | 6.74  | 3.24E-05 | 0.00070203 | protein phosphatase 2C domain-containing protein               |
| TGME49_253700 | 1.05  | 8.07  | 3.34E-05 | 0.00072151 | transporter, major facilitator family protein                  |
| TGME49_254150 | 1.91  | 5.06  | 3.48E-05 | 0.00074456 | hypothetical protein                                           |
| TGME49_237015 | 1.37  | 7.25  | 3.49E-05 | 0.00074582 | hypothetical protein                                           |
| TGME49_258070 | -1.50 | 6.52  | 3.51E-05 | 0.00074672 | hypothetical protein                                           |
| TGME49_264870 | 1.39  | 7.17  | 3.56E-05 | 0.00075299 | Sodium:neurotransmitter symporter family protein               |
| TGME49_321540 | -1.49 | 7.23  | 3.55E-05 | 0.00075299 | hypothetical protein                                           |
| TGME49_208820 | 1.40  | 5.90  | 3.58E-05 | 0.00075454 | 1-deoxy-D-xylulose-5-phosphate synthase                        |
| TGME49_226580 | 1.12  | 7.53  | 3.60E-05 | 0.00075454 | hypothetical protein                                           |
| TGME49_292610 | 1.62  | 5.59  | 3.73E-05 | 0.00078154 | Toxoplasma gondii family C protein                             |
| TGME49_213570 | 4.95  | 11.16 | 3.76E-05 | 0.00078515 | hypothetical protein                                           |
| TGME49_202620 | 1.18  | 8.17  | 3.81E-05 | 0.00079086 | hypothetical protein                                           |
| TGME49_213680 | -2.26 | 5.20  | 3.81E-05 | 0.00079086 | MmgE/PrpD family protein                                       |
| TGME49_245530 | 3.38  | 5.81  | 3.83E-05 | 0.00079126 | hypothetical protein                                           |
| TGME49_296015 | 1.22  | 6.47  | 3.83E-05 | 0.00079126 | hypothetical protein                                           |
| TGME49_247770 | 1.09  | 7.98  | 3.90E-05 | 0.00080249 | hypothetical protein                                           |
| TGME49_272600 | -1.29 | 6.43  | 4.03E-05 | 0.0008268  | adaptin c-terminal domain-containing protein                   |
| TGME49_284660 | 1.58  | 5.36  | 4.09E-05 | 0.00083268 | mitochondrial ribosomal protein s6-2, putative                 |
| TGME49_232600 | 1.57  | 6.53  | 4.09E-05 | 0.00083268 | phospholipase, patatin family protein                          |
| TGME49_228320 | -3.92 | 4.54  | 4.07E-05 | 0.00083268 | hypothetical protein                                           |
| TGME49_253000 | 1.22  | 6.88  | 4.16E-05 | 0.00084394 | ELMO/CED-12 family protein                                     |
| TGME49_285830 | -1.60 | 5.93  | 4.17E-05 | 0.00084394 | hypothetical protein                                           |
| TGME49_304680 | -1.82 | 5.66  | 4.31E-05 | 0.00087025 | ubiquitin family protein                                       |
| TGME49_226260 | 1.23  | 7.27  | 4.35E-05 | 0.00087489 | hypothetical protein                                           |
| TGME49_313230 | 2.44  | 9.56  | 4.39E-05 | 0.00088135 | eukaryotic initiation factor-2, alpha subunit                  |
| TGME49_210430 | -1.23 | 7.63  | 4.57E-05 | 0.00091561 | DnaI domain-containing protein                                 |
| TGME49_310210 | 1.73  | 5.89  | 4.63E-05 | 0.00092286 | hypothetical protein                                           |
| TGME49_255960 | -1.75 | 6.00  | 4.63E-05 | 0.00092286 | hypothetical protein                                           |
| TGME49_286480 | 2.55  | 5.39  | 4.70E-05 | 0.00093441 | hypothetical protein                                           |
| TGME49_240580 | -1.94 | 5.54  | 4.80E-05 | 0.00095103 | hypothetical protein                                           |
| TGME49_299240 | 1.62  | 5.35  | 4.84E-05 | 0.00095571 | hypothetical protein                                           |
| TGME49_297180 | -1.25 | 8.34  | 4.88E-05 | 0.00096169 | hypothetical protein                                           |
| TGME49_254000 | 1.26  | 7.14  | 5.12E-05 | 0.00100273 | hypothetical protein                                           |
| TGME49_311660 | -1.65 | 5.95  | 5.21E-05 | 0.00101937 | histone lysine methyltransferase, SET, putative                |
| TGME49_240950 | -3.14 | 5.11  | 5.27E-05 | 0.00102775 | hypothetical protein                                           |
| TGME49_249770 | 1.95  | 4.97  | 5.30E-05 | 0.00103013 | Nmda1 protein                                                  |
| TGME49_238240 | 5.33  | 11.68 | 5.32E-05 | 0.00103241 | bystin protein                                                 |
| TGME49_200360 | 1.62  | 9.81  | 5.48E-05 | 0.00105807 | hypothetical protein                                           |
| TGME49_253490 | 1.38  | 6.93  | 5.48E-05 | 0.00105807 | hypothetical protein                                           |
| TGME49_257910 | 4.40  | 5.13  | 5.72E-05 | 0.00110166 | hypothetical protein                                           |
| TGME49_261000 | -1.73 | 6.99  | 5.75E-05 | 0.00110431 | MutS domain V domain-containing protein                        |
| TGME49_217770 | 1.14  | 6.54  | 5.80E-05 | 0.00110691 | hypothetical protein                                           |
| TGME49_207630 | -3.31 | 4.99  | 5.80E-05 | 0.00110691 | peptidyl-tRNA hydrolase domain-containing protein              |
| TGME49_269930 | -2.18 | 6.65  | 5.99E-05 | 0.00114015 | calcium binding egf domain-containing protein                  |

|               |       |      |            |            |                                                               |
|---------------|-------|------|------------|------------|---------------------------------------------------------------|
| TGME49_266990 | -1.22 | 7.64 | 6.00E-05   | 0.00114068 | beta-COP                                                      |
| TGME49_234640 | -1.52 | 6.39 | 6.03E-05   | 0.0011418  | hypothetical protein                                          |
| TGME49_270830 | 1.18  | 7.26 | 6.44E-05   | 0.00121316 | small nuclear ribonucleoprotein                               |
| TGME49_249180 | 1.05  | 8.01 | 6.61E-05   | 0.00123684 | bifunctional dihydrofolate reductase-thymidylate synthase     |
| TGME49_201380 | 1.04  | 8.56 | 6.67E-05   | 0.00124462 | chorismate synthase, putative                                 |
| TGME49_253170 | 1.97  | 6.90 | 6.82E-05   | 0.00126914 | zinc carboxypeptidase, putative                               |
| TGME49_307570 | -1.64 | 6.39 | 6.85E-05   | 0.00127289 | glycerol-3-phosphate dehydrogenase (gpdh), putative           |
| TGME49_310100 | -2.01 | 5.38 | 7.17E-05   | 0.00132208 | mannosyltransferase (pig-m) protein                           |
| TGME49_275450 | 1.04  | 7.53 | 7.33E-05   | 0.00134483 | hypothetical protein                                          |
| TGME49_249620 | -1.53 | 6.08 | 7.73E-05   | 0.00140355 | histone deacetylase HDAC2                                     |
| TGME49_280375 | 2.90  | 5.70 | 7.79E-05   | 0.00140723 | hypothetical protein                                          |
| TGME49_208910 | -1.60 | 6.43 | 7.77E-05   | 0.00140723 | hypothetical protein                                          |
| TGME49_289050 | 1.75  | 7.40 | 8.16E-05   | 0.00147089 | FIKK kinase, putative                                         |
| TGME49_249860 | -1.42 | 7.01 | 8.26E-05   | 0.00148335 | hypothetical protein                                          |
| TGME49_299060 | 1.37  | 6.85 | 8.31E-05   | 0.00148654 | sodium/hydrogen exchanger NHE2                                |
| TGME49_242640 | 1.10  | 6.51 | 8.35E-05   | 0.00148733 | hypothetical protein                                          |
| TGME49_269710 | -1.47 | 6.75 | 8.34E-05   | 0.00148733 | hypothetical protein                                          |
| TGME49_203290 | 1.61  | 8.29 | 8.49E-05   | 0.00150776 | hypothetical protein                                          |
| TGME49_312160 | 1.26  | 7.86 | 8.61E-05   | 0.0015259  | hypothetical protein                                          |
| TGME49_214530 | -2.24 | 6.70 | 8.74E-05   | 0.00154499 | DnaJ domain-containing protein                                |
| TGME49_226680 | -1.23 | 7.34 | 8.89E-05   | 0.00156828 | hypothetical protein                                          |
| TGME49_247250 | -1.28 | 6.92 | 9.00E-05   | 0.00158135 | RbAp46                                                        |
| TGME49_264780 | -1.66 | 5.70 | 9.06E-05   | 0.00158626 | UTP-glucose-1-phosphate uridylyltransferase subfamily protein |
| TGME49_214380 | -1.99 | 5.63 | 9.11E-05   | 0.00159144 | hypothetical protein                                          |
| TGME49_277540 | 1.89  | 4.45 | 9.22E-05   | 0.00160702 | hypothetical protein                                          |
| TGME49_267750 | -1.38 | 6.69 | 9.24E-05   | 0.00160702 | hypothetical protein                                          |
| TGME49_214090 | 1.81  | 7.04 | 9.43E-05   | 0.00163393 | signal peptidase                                              |
| TGME49_293380 | -2.21 | 5.59 | 9.44E-05   | 0.00163393 | histone lysine acetyltransferase HAT1                         |
| TGME49_287160 | -1.19 | 7.58 | 9.53E-05   | 0.00164537 | internal kinesin motor domain protein                         |
| TGME49_241155 | 1.88  | 5.87 | 9.76E-05   | 0.00167846 | hypothetical protein                                          |
| TGME49_288840 | 1.26  | 7.00 | 9.76E-05   | 0.00167846 | hypothetical protein                                          |
| TGME49_237230 | 1.49  | 9.68 | 9.95E-05   | 0.00170485 | hypothetical protein                                          |
| TGME49_268790 | 1.04  | 8.26 | 9.96E-05   | 0.00170485 | hypothetical protein                                          |
| TGME49_253650 | 1.02  | 8.06 | 0.00010196 | 0.00174052 | DnaJ C terminal region domain-containing protein              |
| TGME49_268620 | -2.80 | 5.03 | 0.00010302 | 0.00175472 | blood stage antigen 41-3 precursor, putative                  |
| TGME49_217360 | -2.15 | 5.84 | 0.00010341 | 0.00175727 | hypothetical protein                                          |
| TGME49_298840 | 1.36  | 6.46 | 0.0001044  | 0.00177003 | hypothetical protein                                          |
| TGME49_217350 | -2.31 | 5.20 | 0.0001057  | 0.00177991 | methyltransferase MTA70, putative                             |
| TGME49_275990 | 1.29  | 6.60 | 0.00010839 | 0.00180531 | hypothetical protein                                          |
| TGME49_259700 | 1.16  | 7.16 | 0.00010835 | 0.00180531 | hypothetical protein                                          |
| TGME49_207230 | 1.16  | 6.18 | 0.00010773 | 0.00180531 | hypothetical protein                                          |
| TGME49_271930 | -1.06 | 8.48 | 0.00010864 | 0.00180531 | hypothetical protein                                          |
| TGME49_205150 | -1.81 | 5.18 | 0.00010837 | 0.00180531 | ACR, YagE family COG1723 domain-containing protein            |
| TGME49_223150 | -2.38 | 5.54 | 0.00010867 | 0.00180531 | START domain-containing protein                               |
| TGME49_294930 | -1.37 | 7.12 | 0.00011075 | 0.00183576 | leucine rich repeat-containing protein                        |
| TGME49_260310 | 1.84  | 4.60 | 0.00011361 | 0.00187882 | ATP-binding cassette transporter ABC.B1                       |
| TGME49_275320 | -1.34 | 7.96 | 0.00011405 | 0.0018819  | penicillin amidase                                            |
| TGME49_248830 | -1.43 | 6.41 | 0.00011478 | 0.00188945 | phosphoinositide phospholipase PIPLC                          |
| TGME49_253370 | 1.27  | 7.36 | 0.00011576 | 0.00189739 | hypothetical protein                                          |

|               |       |       |            |            |                                                                                     |
|---------------|-------|-------|------------|------------|-------------------------------------------------------------------------------------|
| TGME49_283710 | -1.50 | 6.77  | 0.00011619 | 0.00189739 | Longevity-assurance protein (LAG1) domain-containing protein                        |
| TGME49_254580 | 1.29  | 7.13  | 0.00011748 | 0.001913   | UDP-galactose transporter family protein                                            |
| TGME49_321560 | -1.47 | 6.59  | 0.00011777 | 0.00191356 | zinc knuckle domain-containing protein                                              |
| TGME49_278270 | -2.06 | 5.13  | 0.00012045 | 0.00194848 | nucleolar protein, structural component of H/ACA snoRNPs, putative                  |
| TGME49_264660 | 1.41  | 8.88  | 0.00012145 | 0.00196038 | SAG-related sequence SRS44                                                          |
| TGME49_229650 | -1.58 | 6.31  | 0.00012329 | 0.00198585 | josephin protein                                                                    |
| TGME49_210380 | -1.26 | 6.94  | 0.00012436 | 0.00199871 | hypothetical protein                                                                |
| TGME49_235740 | -1.69 | 5.82  | 0.00012526 | 0.00200877 | hypothetical protein                                                                |
| TGME49_225440 | -4.09 | 4.61  | 0.00012692 | 0.00203106 | hypothetical protein                                                                |
| TGME49_263080 | 1.10  | 7.13  | 0.0001306  | 0.00208087 | hypothetical protein                                                                |
| TGME49_320110 | 2.51  | 8.51  | 0.00013476 | 0.00213799 | proliferating cell nuclear antigen PCNA2                                            |
| TGME49_228370 | -1.53 | 5.97  | 0.00013468 | 0.00213799 | hypothetical protein                                                                |
| TGME49_214540 | 1.16  | 6.96  | 0.000143   | 0.00225424 | hypothetical protein                                                                |
| TGME49_251500 | -1.28 | 7.59  | 0.0001428  | 0.00225424 | eukaryotic initiation factor-3, subunit 3, putative                                 |
| TGME49_273030 | -1.68 | 5.86  | 0.00014367 | 0.00225997 | phosphoglycerate mutase family protein                                              |
| TGME49_311780 | -1.47 | 6.01  | 0.0001462  | 0.00229487 | Zn-containing alcohol dehydrogenase                                                 |
| TGME49_215360 | 1.53  | 5.92  | 0.00014656 | 0.00229568 | hypothetical protein                                                                |
| TGME49_225240 | 1.15  | 6.65  | 0.00014707 | 0.00229887 | 50S ribosomal protein L13, putative                                                 |
| TGME49_262970 | 1.54  | 7.43  | 0.00015    | 0.00233965 | hypothetical protein                                                                |
| TGME49_293820 | -1.22 | 7.28  | 0.0001509  | 0.00234738 | calpain family cysteine protease domain-containing protein                          |
| TGME49_289720 | -1.60 | 6.89  | 0.00015113 | 0.00234738 | hypothetical protein                                                                |
| TGME49_295990 | 1.11  | 6.85  | 0.00015382 | 0.00238426 | ubiquitin conjugating enzyme E2, putative                                           |
| TGME49_206695 | 1.95  | 4.49  | 0.00016032 | 0.00247464 | hypothetical protein                                                                |
| TGME49_311440 | 1.24  | 6.20  | 0.00016394 | 0.00251799 | SAG-related sequence SRS50                                                          |
| TGME49_202980 | -1.34 | 6.64  | 0.00016458 | 0.00251932 | hypothetical protein                                                                |
| TGME49_205250 | 1.32  | 9.50  | 0.00016665 | 0.00254576 | rhoptry protein ROP18                                                               |
| TGME49_226020 | 1.25  | 8.77  | 0.00016756 | 0.00255441 | transporter, major facilitator family protein                                       |
| TGME49_278800 | -1.21 | 7.30  | 0.00016884 | 0.00256872 | zinc finger protein 36 family 3 protein                                             |
| TGME49_262500 | -1.50 | 7.65  | 0.00017147 | 0.00260332 | hypothetical protein                                                                |
| TGME49_306260 | 1.17  | 6.14  | 0.00017508 | 0.00264731 | hypothetical protein                                                                |
| TGME49_318320 | -2.05 | 5.30  | 0.00017586 | 0.00265368 | ATP-dependent Clp endopeptidase, proteolytic subunit ClpP domain-containing protein |
| TGME49_255240 | -1.95 | 5.60  | 0.00017657 | 0.00265893 | hypothetical protein                                                                |
| TGME49_220400 | 1.70  | 10.26 | 0.00017926 | 0.00269402 | actin depolymerizing factor ADF                                                     |
| TGME49_241140 | -1.88 | 5.27  | 0.0001812  | 0.00271213 | DEAD/DEAH box helicase domain-containing protein                                    |
| TGME49_219610 | 1.77  | 5.75  | 0.00018223 | 0.00272213 | hypothetical protein                                                                |
| TGME49_306470 | -1.34 | 6.37  | 0.00018271 | 0.0027237  | isoprenylcysteine carboxyl methyltransferase (icmt) family protein                  |
| TGME49_217010 | -1.53 | 6.08  | 0.00018638 | 0.00277281 | hypothetical protein                                                                |
| TGME49_277260 | 2.11  | 9.98  | 0.00018803 | 0.00279175 | hypothetical protein                                                                |
| TGME49_231180 | -2.97 | 5.84  | 0.00018927 | 0.00280466 | hypothetical protein                                                                |
| TGME49_254610 | 1.37  | 5.28  | 0.00019092 | 0.00281784 | Tim10/DDP family zinc finger superfamily protein                                    |
| TGME49_315910 | 1.44  | 5.62  | 0.00019569 | 0.00287684 | hypothetical protein                                                                |
| TGME49_201260 | -1.14 | 8.89  | 0.0001957  | 0.00287684 | sugar transporter ST3                                                               |
| TGME49_283820 | -2.68 | 4.90  | 0.00020268 | 0.00296774 | glycine cleavage T-protein (aminomethyl transferase) domain-containing protein      |
| TGME49_211030 | -1.10 | 8.08  | 0.00020475 | 0.00298627 | hypothetical protein                                                                |
| TGME49_260830 | -2.72 | 5.12  | 0.00020594 | 0.00299762 | hypothetical protein                                                                |
| TGME49_240430 | -2.18 | 4.90  | 0.00020659 | 0.00300129 | glyoxalase family protein                                                           |

|               |       |       |            |            |                                                                     |
|---------------|-------|-------|------------|------------|---------------------------------------------------------------------|
| TGME49_275755 | 2.33  | 5.33  | 0.00020703 | 0.00300178 | hypothetical protein                                                |
| TGME49_310130 | -1.52 | 6.23  | 0.00020806 | 0.00301072 | Spc97 / Spc98 family protein                                        |
| TGME49_240440 | 1.19  | 5.78  | 0.00020901 | 0.00301866 | hypothetical protein                                                |
| TGME49_258390 | 1.39  | 5.51  | 0.0002127  | 0.00305427 | DnaI protein, putative                                              |
| TGME49_307580 | -1.23 | 6.83  | 0.00021354 | 0.00305427 | CBS domain-containing protein                                       |
| TGME49_215040 | -1.33 | 6.56  | 0.00021334 | 0.00305427 | HEAT repeat-containing protein                                      |
| TGME49_216040 | -2.16 | 6.31  | 0.00021273 | 0.00305427 | 30S ribosomal protein S15, putative                                 |
| TGME49_215390 | 1.69  | 4.45  | 0.00021478 | 0.00306603 | TIM10 family protein, putative                                      |
| TGME49_310360 | -1.20 | 7.38  | 0.00021601 | 0.00307772 | hypothetical protein                                                |
| TGME49_291930 | 3.68  | 9.99  | 0.00021864 | 0.00310928 | RNA recognition motif-containing protein                            |
| TGME49_257360 | 1.87  | 5.87  | 0.00022073 | 0.00312699 | hypothetical protein                                                |
| TGME49_202830 | 1.10  | 9.13  | 0.00022118 | 0.00312739 | Elicitor-responsive protein, putative                               |
| TGME49_263720 | -2.18 | 5.02  | 0.00022205 | 0.00313362 | HMG (high mobility group) box domain-containing protein             |
| TGME49_248900 | -2.04 | 5.41  | 0.00022272 | 0.00313709 | hypothetical protein                                                |
| TGME49_311210 | -1.38 | 6.42  | 0.00022784 | 0.00320318 | hypothetical protein                                                |
| TGME49_258940 | 1.50  | 5.29  | 0.00023364 | 0.00327231 | acylphosphatase family protein                                      |
| TGME49_297420 | -1.75 | 5.89  | 0.0002366  | 0.00330753 | beta-tubulin cofactor D, putative                                   |
| TGME49_220940 | 1.51  | 5.59  | 0.00024171 | 0.00336642 | ribosomal RNA methyltransferase (FtsJ ) family protein              |
| TGME49_279100 | 1.08  | 9.07  | 0.00024172 | 0.00336642 | hypothetical protein                                                |
| TGME49_254880 | 1.03  | 8.02  | 0.00024401 | 0.00339181 | Alpha-galactosidase                                                 |
| TGME49_253615 | 1.46  | 5.78  | 0.00024777 | 0.00341981 | hypothetical protein                                                |
| TGME49_285710 | 1.31  | 5.78  | 0.00024654 | 0.00341981 | hypothetical protein                                                |
| TGME49_271430 | -2.03 | 5.19  | 0.00024712 | 0.00341981 | hypothetical protein                                                |
| TGME49_252630 | 1.10  | 8.01  | 0.00025155 | 0.00345142 | hypothetical protein                                                |
| TGME49_298610 | -1.02 | 7.94  | 0.00025138 | 0.00345142 | GYF domain-containing protein                                       |
| TGME49_202650 | -1.66 | 5.60  | 0.00025401 | 0.00347274 | hypothetical protein                                                |
| TGME49_301280 | -2.29 | 5.06  | 0.00025405 | 0.00347274 | hypothetical protein                                                |
| TGME49_244380 | 2.30  | 8.24  | 0.0002549  | 0.003478   | cactin                                                              |
| TGME49_309070 | -1.93 | 5.42  | 0.00025634 | 0.00348477 | hypothetical protein                                                |
| TGME49_268570 | -1.14 | 7.32  | 0.00025918 | 0.00351065 | zinc finger (CCCH type) motif-containing protein                    |
| TGME49_220530 | -1.91 | 5.46  | 0.00025947 | 0.00351065 | AP2 domain transcription factor AP2V-1                              |
| TGME49_257290 | -1.92 | 5.15  | 0.00025966 | 0.00351065 | RNA 2'-phosphotransferase, Tpt1/KptA family protein                 |
| TGME49_253710 | 1.14  | 7.77  | 0.00026178 | 0.00353284 | hypothetical protein                                                |
| TGME49_245980 | 2.76  | 5.83  | 0.00026623 | 0.00358635 | hypothetical protein                                                |
| TGME49_253900 | 1.57  | 5.99  | 0.00027101 | 0.00363758 | parasite porphobilinogen synthase PBGS                              |
| TGME49_227390 | -1.67 | 5.40  | 0.00027099 | 0.00363758 | hypothetical protein                                                |
| TGME49_321410 | 2.79  | 8.06  | 0.00027185 | 0.00364221 | hypothetical protein                                                |
| TGME49_272650 | -1.50 | 6.03  | 0.00027238 | 0.00364278 | 3'-5'-cyclic nucleotide phosphodiesterase domain-containing protein |
| TGME49_290970 | 2.67  | 6.33  | 0.00028983 | 0.00384145 | 8-amino-7-oxononanoate synthase                                     |
| TGME49_218830 | -2.05 | 5.10  | 0.00028966 | 0.00384145 | hypothetical protein                                                |
| TGME49_237290 | -1.34 | 6.65  | 0.0002916  | 0.00385804 | hypothetical protein                                                |
| TGME49_306410 | -2.03 | 5.32  | 0.00029279 | 0.00385987 | hypothetical protein                                                |
| TGME49_227430 | -1.65 | 5.71  | 0.0002961  | 0.00389663 | transmembrane amino acid transporter protein                        |
| TGME49_258670 | -1.66 | 5.14  | 0.00029873 | 0.00392422 | hypothetical protein                                                |
| TGME49_208010 | 1.18  | 6.38  | 0.00030131 | 0.00395111 | hypothetical protein                                                |
| TGME49_224830 | -2.46 | 4.54  | 0.00030261 | 0.0039612  | hypothetical protein                                                |
| TGME49_293500 | -2.44 | 5.07  | 0.00030727 | 0.00401513 | hypothetical protein                                                |
| TGME49_227570 | 1.08  | 6.79  | 0.00030857 | 0.00402499 | transmembrane amino acid transporter protein                        |
| TGME49_320050 | 7.07  | 16.23 | 0.00031559 | 0.00409026 | ribosomal protein RPL5                                              |

|               |       |       |            |            |                                                                 |
|---------------|-------|-------|------------|------------|-----------------------------------------------------------------|
| TGME49_217640 | 1.39  | 6.15  | 0.00031515 | 0.00409026 | hypothetical protein                                            |
| TGME49_253780 | 1.16  | 6.63  | 0.00031578 | 0.00409026 | GTP cyclohydrolase I, putative                                  |
| TGME49_214970 | -1.28 | 8.09  | 0.00031639 | 0.00409098 | DNA replication licensing factor, putative                      |
| TGME49_256060 | -1.24 | 6.61  | 0.00031722 | 0.00409186 | nucleosome assembly protein (nap) protein                       |
| TGME49_286140 | -1.63 | 5.87  | 0.00032595 | 0.00419266 | hypothetical protein                                            |
| TGME49_253820 | 1.05  | 8.35  | 0.00033729 | 0.00433105 | hypothetical protein                                            |
| TGME49_289650 | 0.98  | 8.20  | 0.00034007 | 0.00435909 | PEP-carboxykinase I                                             |
| TGME49_246530 | 1.85  | 5.05  | 0.00034283 | 0.00438696 | phospholipase D active site domain-containing protein           |
| TGME49_248160 | -2.29 | 4.95  | 0.00034393 | 0.00439345 | hypothetical protein                                            |
| TGME49_245480 | 2.41  | 5.06  | 0.00034499 | 0.00439932 | hypothetical protein                                            |
| TGME49_262010 | 1.18  | 6.19  | 0.00035281 | 0.00449132 | calmodulin CAM2                                                 |
| TGME49_295400 | -2.03 | 5.29  | 0.00035919 | 0.00456473 | hypothetical protein                                            |
| TGME49_267590 | -1.55 | 5.96  | 0.00036778 | 0.00465789 | hypothetical protein                                            |
| TGME49_259240 | 3.87  | 11.70 | 0.0003732  | 0.0047185  | ribosomal protein RPS21                                         |
| TGME49_251730 | -1.40 | 5.85  | 0.00037483 | 0.00473105 | hypothetical protein                                            |
| TGME49_218200 | -2.16 | 5.22  | 0.00037597 | 0.00473731 | UDP-sugar pyrophosphorylase                                     |
| TGME49_251530 | 2.18  | 4.57  | 0.00038103 | 0.00478487 | hypothetical protein                                            |
| TGME49_225680 | -2.00 | 5.41  | 0.00039855 | 0.00497119 | hypothetical protein                                            |
| TGME49_289340 | 1.81  | 5.26  | 0.00040109 | 0.00499445 | hypothetical protein                                            |
| TGME49_323110 | 1.76  | 5.68  | 0.00040292 | 0.00500874 | hypothetical protein                                            |
| TGME49_280580 | 1.79  | 5.41  | 0.00040369 | 0.00500994 | SAG-related sequence SRS35B                                     |
| TGME49_214270 | 2.72  | 9.52  | 0.00040485 | 0.00501594 | translation initiation factor IF-2, putative                    |
| TGME49_228630 | -1.09 | 6.96  | 0.00041207 | 0.00506598 | hypothetical protein                                            |
| TGME49_209210 | -1.25 | 6.93  | 0.00041234 | 0.00506598 | hypothetical protein                                            |
| TGME49_288700 | -1.76 | 5.73  | 0.00041191 | 0.00506598 | RecF/RecN/SMC N terminal domain-containing protein              |
| TGME49_248400 | 1.09  | 6.18  | 0.00041542 | 0.0050873  | glyoxalase I, putative                                          |
| TGME49_251520 | 1.15  | 5.78  | 0.0004188  | 0.00512022 | hypothetical protein                                            |
| TGME49_247360 | 0.99  | 7.30  | 0.00042302 | 0.00515238 | PAP2 superfamily protein                                        |
| TGME49_216020 | -1.83 | 5.94  | 0.00042351 | 0.00515238 | peptidase family c78 protein                                    |
| TGME49_244040 | -1.83 | 5.58  | 0.00044241 | 0.0053735  | HEAT repeat-containing protein                                  |
| TGME49_295472 | -1.50 | 6.42  | 0.00044644 | 0.00540307 | C2 domain-containing protein                                    |
| TGME49_318480 | -1.61 | 5.98  | 0.00044602 | 0.00540307 | SWI2/SNF2-containing protein RAD5                               |
| TGME49_244230 | -1.85 | 5.98  | 0.00044703 | 0.00540307 | hypothetical protein                                            |
| TGME49_254630 | 1.08  | 6.41  | 0.00044998 | 0.00542985 | CMGC kinase                                                     |
| TGME49_224540 | -1.65 | 5.44  | 0.00045125 | 0.00543632 | hypothetical protein                                            |
| TGME49_263860 | -1.85 | 5.11  | 0.00045363 | 0.00545612 | hypothetical protein                                            |
| TGME49_220290 | -1.84 | 5.53  | 0.00045466 | 0.00545961 | hypothetical protein                                            |
| TGME49_258590 | -2.06 | 5.43  | 0.00046042 | 0.0055198  | hypothetical protein                                            |
| TGME49_312210 | 1.89  | 4.65  | 0.00046326 | 0.00554495 | hypothetical protein                                            |
| TGME49_254915 | 2.78  | 4.55  | 0.0004714  | 0.0056254  | hypothetical protein                                            |
| TGME49_246050 | -2.18 | 5.13  | 0.0004715  | 0.0056254  | hypothetical protein                                            |
| TGME49_239710 | -1.61 | 5.95  | 0.00047234 | 0.00562632 | phosphomannomutase                                              |
| TGME49_237830 | -1.66 | 5.67  | 0.00047386 | 0.00563538 | DNA polymerase I domain-containing protein                      |
| TGME49_200320 | -1.13 | 7.51  | 0.00047618 | 0.00565326 | hypoxanthine-xanthine-guanine phosphoribosyl transferase HXGPRT |
| TGME49_300030 | -1.19 | 6.63  | 0.00047689 | 0.00565326 | hypothetical protein                                            |
| TGME49_203790 | 1.02  | 8.37  | 0.00048396 | 0.00572027 | hypothetical protein                                            |
| TGME49_206610 | -1.41 | 6.14  | 0.00048409 | 0.00572027 | pyruvate dehydrogenase complex subunit PDH-E2                   |
| TGME49_209050 | -1.38 | 6.89  | 0.00048677 | 0.00574284 | Tyrosine kinase-like (TKL) protein                              |
| TGME49_236890 | 1.02  | 7.34  | 0.00049118 | 0.00578556 | hypothetical protein                                            |
| TGME49_313910 | 1.57  | 10.01 | 0.00049959 | 0.00587529 | RNA recognition motif 2 protein                                 |

|               |       |      |            |            |                                               |
|---------------|-------|------|------------|------------|-----------------------------------------------|
| TGME49_254390 | 1.58  | 7.06 | 0.00050075 | 0.0058796  | CRAL/TRIO domain-containing protein           |
| TGME49_277490 | 1.05  | 7.17 | 0.00050586 | 0.00592088 | hypothetical protein                          |
| TGME49_261022 | -2.98 | 7.41 | 0.0005053  | 0.00592088 | dynein heavy chain family protein             |
| TGME49_273950 | -1.88 | 5.27 | 0.00051067 | 0.00596775 | replication factor C subunit 5, putative      |
| TGME49_224060 | 0.94  | 7.95 | 0.00051455 | 0.00598479 | thioredoxin, putative                         |
| TGME49_242570 | -1.04 | 7.55 | 0.00051418 | 0.00598479 | hypothetical protein                          |
| TGME49_261720 | -1.16 | 7.53 | 0.00051304 | 0.00598479 | metal cation transporter, ZIP family protein  |
| TGME49_207065 | 1.20  | 5.52 | 0.00051894 | 0.00600469 | hypothetical protein                          |
| TGME49_207830 | 1.05  | 6.06 | 0.00051865 | 0.00600469 | MORN repeat-containing protein                |
| TGME49_203390 | -1.16 | 7.31 | 0.00051776 | 0.00600469 | CRAL/TRIO domain-containing protein           |
| TGME49_221390 | -1.37 | 6.10 | 0.0005195  | 0.00600469 | hypothetical protein                          |
| TGME49_249550 | -1.52 | 5.67 | 0.00053136 | 0.00610449 | hypothetical protein                          |
| TGME49_212100 | -1.56 | 5.33 | 0.00053143 | 0.00610449 | ThiF family protein                           |
| TGME49_216375 | -2.35 | 4.74 | 0.00053084 | 0.00610449 | hypothetical protein                          |
| TGME49_253950 | 1.22  | 5.56 | 0.00053665 | 0.0061454  | protein fam50a, putative                      |
| TGME49_290670 | 0.99  | 8.78 | 0.00053847 | 0.00615662 | leucyl aminopeptidase LAP                     |
| TGME49_217780 | 1.47  | 5.16 | 0.00054126 | 0.006179   | Sec20 protein                                 |
| TGME49_290740 | -2.09 | 5.25 | 0.00054624 | 0.00620723 | hypothetical protein                          |
| TGME49_308010 | -1.86 | 6.49 | 0.00054969 | 0.0062368  | hypothetical protein                          |
| TGME49_253940 | 1.04  | 6.85 | 0.00055157 | 0.00624856 | CAM Kinase family, incomplete catalytic triad |
| TGME49_294730 | -1.42 | 6.07 | 0.00055332 | 0.00625884 | hypothetical protein                          |
| TGME49_215710 | -1.38 | 6.00 | 0.00055445 | 0.00626204 | hypothetical protein                          |
| TGME49_230430 | -1.88 | 5.37 | 0.00056273 | 0.00634589 | vesicle-associated membrane protein, putative |
| TGME49_224170 | 1.76  | 4.86 | 0.00056589 | 0.00637183 | SAG-related sequence SRS60A                   |
| TGME49_220910 | -1.47 | 6.95 | 0.0005682  | 0.00638819 | HEAT repeat-containing protein                |
| TGME49_246330 | -1.15 | 6.92 | 0.00056962 | 0.0063944  | CRAL/TRIO domain-containing protein           |
| TGME49_233030 | -1.03 | 8.47 | 0.00058262 | 0.00652056 | gliding-associated protein GAP70              |
| TGME49_289310 | -1.26 | 6.48 | 0.00058673 | 0.00654682 | cullin family protein                         |
| TGME49_235980 | -1.58 | 5.63 | 0.00058866 | 0.00655846 | ARIADNE family protein                        |
| TGME49_297720 | -1.24 | 7.42 | 0.00059117 | 0.00657655 | trehalose-phosphatase                         |
| TGME49_311920 | -1.12 | 7.15 | 0.00059573 | 0.00661734 | GRAM domain-containing protein                |
| TGME49_297730 | -1.75 | 5.78 | 0.00059895 | 0.00664309 | transcription elongation factor 1, putative   |
| TGME49_249990 | 1.43  | 9.14 | 0.00060552 | 0.00670593 | hypothetical protein                          |
| TGME49_224020 | 1.06  | 6.40 | 0.00061361 | 0.00678538 | hypothetical protein                          |
| TGME49_254950 | 1.38  | 5.04 | 0.00061786 | 0.00681209 | RNA cap guanine-N2 methyltransferase          |
| TGME49_262825 | 1.47  | 4.65 | 0.00062213 | 0.00682602 | peptidase family c50 protein                  |
| TGME49_239410 | -1.12 | 7.88 | 0.00062358 | 0.00682602 | hypothetical protein                          |
| TGME49_293470 | -1.12 | 7.24 | 0.00062105 | 0.00682602 | hypothetical protein                          |
| TGME49_208040 | -1.50 | 5.94 | 0.00062308 | 0.00682602 | aldo-keto reductase                           |
| TGME49_212300 | 0.96  | 8.44 | 0.00063163 | 0.00689214 | hypothetical protein                          |
| TGME49_286180 | -2.39 | 4.55 | 0.00063137 | 0.00689214 | tRNA ligases class I (M) protein              |
| TGME49_299015 | 1.90  | 5.22 | 0.00063513 | 0.00691973 | hypothetical protein                          |
| TGME49_312380 | -1.92 | 5.23 | 0.00063603 | 0.00691973 | tetratricopeptide repeat-containing protein   |
| TGME49_269420 | 2.15  | 6.35 | 0.00064069 | 0.00696024 | hypothetical protein                          |
| TGME49_237860 | -2.24 | 4.89 | 0.00064292 | 0.00697421 | protein kinase domain-containing protein      |
| TGME49_306020 | 1.21  | 5.49 | 0.00064776 | 0.00701154 | hypothetical protein                          |
| TGME49_213730 | 0.99  | 7.46 | 0.00064825 | 0.00701154 | lanthionine synthetase C family protein       |
| TGME49_239490 | 1.04  | 8.02 | 0.00065182 | 0.00702957 | dehydrogenase E1 component family protein     |
| TGME49_244670 | 0.95  | 7.10 | 0.00065302 | 0.00703235 | hypothetical protein                          |
| TGME49_225480 | -1.79 | 5.80 | 0.00065672 | 0.00706193 | hypothetical protein                          |
| TGME49_264970 | -1.82 | 5.65 | 0.00066279 | 0.00711679 | hypothetical protein                          |
| TGME49_253360 | 0.97  | 7.20 | 0.0006654  | 0.00713448 | hypothetical protein                          |
| TGME49_260610 | -2.50 | 4.95 | 0.00066699 | 0.00714123 | methyltransferase                             |

|               |       |       |            |            |                                                                          |
|---------------|-------|-------|------------|------------|--------------------------------------------------------------------------|
| TGME49_232780 | -1.39 | 6.35  | 0.00066938 | 0.00715652 | hypothetical protein                                                     |
| TGME49_305990 | 2.44  | 4.61  | 0.00067037 | 0.00715669 | hypothetical protein                                                     |
| TGME49_202580 | 1.59  | 6.20  | 0.00068139 | 0.00724304 | ATPase, AAA family protein                                               |
| TGME49_315250 | 1.11  | 5.99  | 0.00068027 | 0.00724304 | GAMM1 protein, putative                                                  |
| TGME49_220610 | -1.34 | 6.23  | 0.00068103 | 0.00724304 | protein phosphatase 2C domain-containing protein                         |
| TGME49_254460 | 1.12  | 7.06  | 0.00068717 | 0.00728632 | hypothetical protein                                                     |
| TGME49_320610 | -1.67 | 5.23  | 0.00068743 | 0.00728632 | hypothetical protein                                                     |
| TGME49_208370 | 1.17  | 7.87  | 0.00069257 | 0.00728871 | myosin heavy chain, putative                                             |
| TGME49_234180 | 1.08  | 7.18  | 0.00069215 | 0.00728871 | hypothetical protein                                                     |
| TGME49_293550 | -1.09 | 7.18  | 0.00069176 | 0.00728871 | hypothetical protein                                                     |
| TGME49_235610 | -1.73 | 5.16  | 0.00069063 | 0.00728871 | ATPase, AAA family protein                                               |
| TGME49_240740 | -1.43 | 5.71  | 0.00070131 | 0.00737021 | Sec1 family protein                                                      |
| TGME49_293040 | -1.63 | 6.54  | 0.00070282 | 0.00737567 | hypothetical protein                                                     |
| TGME49_262600 | -2.01 | 4.55  | 0.00070808 | 0.00742029 | hypothetical protein                                                     |
| TGME49_321550 | 1.11  | 5.79  | 0.00071173 | 0.00744802 | hypothetical protein                                                     |
| TGME49_210408 | 1.67  | 10.56 | 0.00072462 | 0.00753998 | HMG (high mobility group) box domain-containing protein                  |
| TGME49_277700 | 1.39  | 4.92  | 0.00072482 | 0.00753998 | ribosomal protein S14 precursor, putative                                |
| TGME49_285170 | -2.94 | 4.61  | 0.0007256  | 0.00753998 | methyltransferase small, putative                                        |
| TGME49_209090 | -1.32 | 6.23  | 0.00073556 | 0.00763277 | proteasome maturation factor ump1 protein                                |
| TGME49_205200 | 1.04  | 6.26  | 0.00073947 | 0.00766253 | hypothetical protein                                                     |
| TGME49_232960 | -1.21 | 7.01  | 0.00074891 | 0.00774959 | oxidoreductase, 2OG-Fe(II) oxygenase family protein                      |
| TGME49_207160 | 1.90  | 5.07  | 0.0007634  | 0.00786841 | SAG-related sequence SRS49D                                              |
| TGME49_253310 | 1.17  | 5.37  | 0.00076358 | 0.00786841 | hypothetical protein                                                     |
| TGME49_305340 | -0.97 | 8.17  | 0.0007628  | 0.00786841 | corepressor complex CRC230                                               |
| TGME49_308060 | 1.36  | 6.55  | 0.00076739 | 0.00788569 | hypothetical protein                                                     |
| TGME49_311905 | -2.49 | 4.73  | 0.00076666 | 0.00788569 | hypothetical protein                                                     |
| TGME49_206640 | -1.11 | 6.71  | 0.00077106 | 0.00791244 | hypothetical protein                                                     |
| TGME49_286510 | 1.27  | 5.67  | 0.00077336 | 0.00792508 | hypothetical protein                                                     |
| TGME49_301216 | -2.44 | 4.54  | 0.00077868 | 0.00796859 | endonuclease/exonuclease/phosphatase family protein                      |
| TGME49_283550 | 1.04  | 6.70  | 0.0007963  | 0.00811693 | hypothetical protein                                                     |
| TGME49_293680 | -1.47 | 6.69  | 0.00079647 | 0.00811693 | hypothetical protein                                                     |
| TGME49_214220 | 1.16  | 9.62  | 0.00079924 | 0.00813402 | hypothetical protein                                                     |
| TGME49_286440 | 1.01  | 6.38  | 0.00080114 | 0.00814214 | malic enzyme                                                             |
| TGME49_260790 | -1.54 | 5.56  | 0.00080772 | 0.00818658 | RAP domain-containing protein                                            |
| TGME49_255635 | -3.83 | 5.32  | 0.00080688 | 0.00818658 | hypothetical protein                                                     |
| TGME49_294890 | -1.25 | 6.50  | 0.00081081 | 0.00820665 | hypothetical protein                                                     |
| TGME49_258410 | 1.07  | 9.04  | 0.00083772 | 0.00844447 | photosensitized INA-labeled protein PHIL1                                |
| TGME49_294200 | 1.35  | 9.66  | 0.00084177 | 0.00847377 | glucose-6-phosphate 1-dehydrogenase                                      |
| TGME49_313830 | -1.28 | 6.30  | 0.00084914 | 0.00852557 | AARP2CN (NUC121) domain-containing protein                               |
| TGME49_268810 | -1.47 | 6.39  | 0.00084922 | 0.00852557 | ck2 beta subunit                                                         |
| TGME49_223600 | -1.69 | 5.52  | 0.00085042 | 0.00852602 | hypothetical protein                                                     |
| TGME49_203080 | 1.07  | 6.45  | 0.00085363 | 0.00853513 | RNA recognition motif-containing protein                                 |
| TGME49_278050 | -1.03 | 8.02  | 0.00085675 | 0.00855481 | proteasome subunit alpha type 1, putative                                |
| TGME49_320430 | -1.26 | 6.00  | 0.00088294 | 0.00879262 | cell-cycle-control protein (translation regulation), putative            |
| TGME49_284010 | -1.68 | 5.11  | 0.00088993 | 0.00885031 | 5'-3' exonuclease, N-terminal resolvase family domain-containing protein |
| TGME49_316230 | -1.42 | 5.94  | 0.00090056 | 0.00894403 | SAC1 phosphoinositide phosphatase, putative                              |
| TGME49_293330 | 1.37  | 5.12  | 0.00090322 | 0.00895842 | hypothetical protein                                                     |
| TGME49_243430 | 1.04  | 7.30  | 0.00091738 | 0.00908673 | OTU family cysteine protease                                             |



|               |       |      |            |            |                                                                                              |
|---------------|-------|------|------------|------------|----------------------------------------------------------------------------------------------|
| TGME49_255660 | -1.26 | 6.20 | 0.00092147 | 0.00911501 | EF hand domain-containing protein                                                            |
| TGME49_241130 | -2.00 | 4.51 | 0.00092372 | 0.0091251  | hypothetical protein                                                                         |
| TGME49_315620 | -1.14 | 6.98 | 0.00093803 | 0.00924181 | vacuolar ATP synthase subunit C, putative                                                    |
| TGME49_261400 | -0.97 | 7.67 | 0.00094728 | 0.00932062 | hypothetical protein                                                                         |
| TGME49_278770 | -1.27 | 7.00 | 0.00094942 | 0.00932922 | hypothetical protein                                                                         |
| TGME49_224210 | -1.35 | 5.83 | 0.00095096 | 0.009332   | hypothetical protein                                                                         |
| TGME49_209970 | -1.38 | 6.05 | 0.00095587 | 0.00936781 | Spc97 / Spc98 family protein                                                                 |
| TGME49_234900 | -0.99 | 7.30 | 0.00096935 | 0.00947094 | PHD-finger domain-containing protein                                                         |
| TGME49_213300 | -1.59 | 5.24 | 0.00097023 | 0.00947094 | hypothetical protein                                                                         |
| TGME49_297940 | -1.28 | 7.54 | 0.00098247 | 0.0095778  | single-strand binding protein                                                                |
| TGME49_238110 | -1.61 | 6.11 | 0.0009905  | 0.00964341 | replication factor a protein 3 protein                                                       |
| TGME49_311310 | -1.08 | 8.09 | 0.00099693 | 0.00969328 | protein phosphatase 2B catalytic subunit, calcineurin family phosphatase superfamily protein |
| TGME49_253990 | 1.02  | 6.61 | 0.00100433 | 0.00972686 | hypothetical protein                                                                         |
| TGME49_237110 | -1.22 | 6.44 | 0.00100263 | 0.00972686 | replication factor C subunit 2, putative                                                     |
| TGME49_262980 | -1.73 | 5.57 | 0.00100373 | 0.00972686 | hypothetical protein                                                                         |
| TGME49_250100 | 1.23  | 6.54 | 0.00100861 | 0.00974839 | hypothetical protein                                                                         |
| TGME49_311770 | -1.18 | 6.85 | 0.00100918 | 0.00974839 | hypothetical protein                                                                         |
| TGME49_318760 | 1.10  | 6.50 | 0.00101542 | 0.00979586 | hypothetical protein                                                                         |
| TGME49_262700 | -1.71 | 5.53 | 0.00101735 | 0.0097972  | tetratricopeptide repeat-containing protein                                                  |
| TGME49_231870 | -1.89 | 5.00 | 0.00101979 | 0.00979974 | tetratricopeptide repeat-containing protein                                                  |
| TGME49_245475 | 1.52  | 5.44 | 0.00103691 | 0.00995141 | hypothetical protein                                                                         |
| TGME49_299250 | 1.19  | 5.36 | 0.00104767 | 0.01002863 | hypothetical protein                                                                         |
| TGME49_260620 | 0.84  | 8.02 | 0.00106431 | 0.01014859 | hypothetical protein                                                                         |
| TGME49_253880 | 0.86  | 7.79 | 0.00109769 | 0.01044003 | GNS1/SUR4 family protein                                                                     |
| TGME49_270510 | -1.37 | 9.30 | 0.00110234 | 0.01045741 | asparaginyl-tRNA synthetase (NOB+tRNA synthase)                                              |
| TGME49_227780 | 1.55  | 5.00 | 0.00110586 | 0.01047738 | hypothetical protein                                                                         |
| TGME49_272640 | -1.31 | 6.48 | 0.00114752 | 0.01083051 | eukaryotic initiation factor-2B, epsilon subunit, putative                                   |
| TGME49_239740 | 1.16  | 9.48 | 0.00115435 | 0.01086729 | dense granule protein GRA14                                                                  |
| TGME49_308950 | 1.04  | 8.04 | 0.00115316 | 0.01086729 | histidine acid phosphatase superfamily protein                                               |
| TGME49_254270 | 1.10  | 5.62 | 0.00115896 | 0.01089686 | hypothetical protein                                                                         |
| TGME49_271270 | 0.92  | 7.35 | 0.00116086 | 0.01090093 | hypothetical protein                                                                         |
| TGME49_288040 | -1.13 | 6.46 | 0.00117831 | 0.01103674 | hypothetical protein                                                                         |
| TGME49_306190 | 0.96  | 9.06 | 0.00118114 | 0.01104931 | hypothetical protein                                                                         |
| TGME49_262860 | -1.63 | 5.63 | 0.00118524 | 0.01107372 | ADP-ribosylation factor family protein 1, putative                                           |
| TGME49_225990 | -1.34 | 5.72 | 0.0011889  | 0.01109393 | acyl transferase domain-containing protein                                                   |
| TGME49_263660 | -2.43 | 4.59 | 0.00119822 | 0.01116681 | hypothetical protein                                                                         |
| TGME49_258740 | -1.35 | 6.23 | 0.00120544 | 0.01121994 | eukaryotic initiation factor-2A, putative                                                    |
| TGME49_252360 | 1.05  | 9.12 | 0.00121013 | 0.01124416 | rhoGTPase family protein ROP24 (incomplete catalytic triad)                                  |
| TGME49_247485 | -1.40 | 5.90 | 0.00121107 | 0.01124416 | zinc finger, C3HC4 type (RING finger) domain-containing protein                              |
| TGME49_215785 | 1.79  | 9.54 | 0.00121831 | 0.0112831  | rhoGTPase protein ROP2A                                                                      |
| TGME49_254470 | 1.02  | 9.17 | 0.00121725 | 0.0112831  | hypothetical protein                                                                         |
| TGME49_318570 | 1.98  | 5.58 | 0.00123734 | 0.01143076 | SFT2 family protein                                                                          |
| TGME49_225790 | 1.61  | 7.29 | 0.00124598 | 0.0114802  | PDI family protein                                                                           |
| TGME49_230705 | 1.20  | 6.59 | 0.00124771 | 0.0114802  | hypothetical protein                                                                         |
| TGME49_265440 | -1.16 | 6.82 | 0.00124889 | 0.0114802  | hypothetical protein                                                                         |
| TGME49_226520 | 1.14  | 6.01 | 0.00125087 | 0.01148413 | hypothetical protein                                                                         |
| TGME49_228300 | -1.74 | 5.32 | 0.00127947 | 0.01171766 | CCDC25 protein                                                                               |
| TGME49_304750 | -1.89 | 4.72 | 0.00127835 | 0.01171766 | zinc finger, C3HC4 type (RING finger) domain-containing protein                              |

|               |       |       |            |            |                                             |
|---------------|-------|-------|------------|------------|---------------------------------------------|
| TGME49_285470 | 1.63  | 5.47  | 0.00128831 | 0.01178402 | patched family protein                      |
| TGME49_248130 | -2.03 | 5.04  | 0.00129028 | 0.01178755 | hypothetical protein                        |
| TGME49_295015 | 1.45  | 5.35  | 0.00129605 | 0.01179016 | patched family protein                      |
| TGME49_201840 | 1.27  | 7.09  | 0.00129543 | 0.01179016 | aspartyl protease ASP1                      |
| TGME49_272380 | 0.85  | 8.00  | 0.00130012 | 0.01179016 | hypothetical protein                        |
| TGME49_270930 | -1.08 | 6.53  | 0.00129811 | 0.01179016 | hypothetical protein                        |
| TGME49_212800 | -1.48 | 6.59  | 0.00129997 | 0.01179016 | hypothetical protein                        |
| TGME49_210370 | 0.86  | 8.26  | 0.0013018  | 0.01179097 | hypothetical protein                        |
| TGME49_313600 | -1.36 | 6.04  | 0.00130427 | 0.01179895 | DDHD domain-containing protein              |
| TGME49_237195 | -1.66 | 5.58  | 0.00131048 | 0.01182627 | hypothetical protein                        |
| TGME49_222100 | 1.01  | 6.62  | 0.00131438 | 0.01183537 | hypothetical protein                        |
| TGME49_291150 | -1.79 | 5.30  | 0.00131469 | 0.01183537 | hypothetical protein                        |
| TGME49_246490 | -1.02 | 7.85  | 0.00133295 | 0.01198525 | hypothetical protein                        |
| TGME49_292200 | -0.93 | 7.70  | 0.001336   | 0.0119876  | RNA recognition motif-containing protein    |
| TGME49_315600 | -1.37 | 5.85  | 0.00133645 | 0.0119876  | MCM2/3/5 family protein                     |
| TGME49_214600 | -1.21 | 6.07  | 0.00133916 | 0.01199741 | hypothetical protein                        |
| TGME49_205265 | 1.64  | 6.35  | 0.00135967 | 0.01216642 | transporter, cation channel family protein  |
| TGME49_218920 | 0.86  | 7.67  | 0.0013621  | 0.01217347 | proteasome subunit beta type, putative      |
| TGME49_270530 | -1.14 | 6.58  | 0.00139367 | 0.01244061 | ubiquitin fusion degradation protein UFD1CY |
| TGME49_208580 | -1.26 | 6.18  | 0.00140175 | 0.01248359 | DNA ligase 1, putative                      |
| TGME49_201780 | 1.52  | 10.10 | 0.00140892 | 0.01253144 | microneme protein MIC2                      |
| TGME49_254070 | 0.92  | 7.76  | 0.00141251 | 0.0125483  | hypothetical protein                        |
| TGME49_273815 | -1.49 | 5.38  | 0.00142162 | 0.01259169 | hypothetical protein                        |
| TGME49_214320 | 1.16  | 9.30  | 0.00143812 | 0.0127148  | facilitative glucose transporter GT1        |
| TGME49_212270 | 1.15  | 9.35  | 0.00146576 | 0.01292836 | hypothetical protein                        |
| TGME49_253640 | 0.95  | 6.96  | 0.0014647  | 0.01292836 | hypothetical protein                        |
| TGME49_249240 | 1.22  | 9.83  | 0.00147131 | 0.01293111 | calmodulin, putative                        |
| TGME49_316260 | 0.99  | 8.32  | 0.0014702  | 0.01293111 | hypothetical protein                        |
| TGME49_311890 | -0.98 | 7.52  | 0.00146916 | 0.01293111 | hypothetical protein                        |
| TGME49_316430 | -1.74 | 6.04  | 0.00148264 | 0.01299983 | target of rapamycin (TOR), putative         |
| TGME49_285230 | -1.43 | 6.69  | 0.00149909 | 0.01312855 | PRP38 family protein                        |
| TGME49_204060 | -1.44 | 5.49  | 0.00154469 | 0.01351189 | SNARE domain-containing protein             |
| TGME49_255410 | -1.21 | 6.98  | 0.00155176 | 0.01354675 | hypothetical protein                        |
| TGME49_279410 | 0.99  | 7.09  | 0.00155805 | 0.01357884 | hypothetical protein                        |
| TGME49_217520 | 0.98  | 8.97  | 0.00155967 | 0.01357884 | hypothetical protein                        |
| TGME49_258050 | -1.98 | 4.70  | 0.00156623 | 0.01359356 | actin like protein ALP2a                    |
| TGME49_244600 | -1.44 | 5.95  | 0.00157538 | 0.01363548 | hypothetical protein                        |
| TGME49_222920 | 1.08  | 6.27  | 0.00159645 | 0.01379494 | mbp-1 interacting protein-2a family protein |
| TGME49_268730 | 1.22  | 5.02  | 0.00160544 | 0.01384713 | glutaredoxin-related protein                |
| TGME49_315580 | -0.97 | 7.08  | 0.00161199 | 0.01387136 | hypothetical protein                        |
| TGME49_204110 | -2.23 | 5.27  | 0.00161041 | 0.01387136 | eIF2 kinase IF2K-C                          |
| TGME49_320190 | -1.69 | 5.09  | 0.00161597 | 0.01388948 | SAG-related sequence SRS16B                 |
| TGME49_266280 | -1.16 | 6.56  | 0.00162976 | 0.01395939 | HEAT repeat-containing protein              |
| TGME49_280518 | -1.09 | 7.81  | 0.00163751 | 0.0140096  | hypothetical protein                        |
| TGME49_257800 | -1.81 | 4.81  | 0.00167302 | 0.01429688 | polynucleotide adenyltransferase            |
| TGME49_295658 | -1.27 | 5.67  | 0.00167941 | 0.01433498 | zinc finger in N-recogin protein            |
| TGME49_216920 | -1.49 | 5.80  | 0.00175009 | 0.0148357  | mediator complex subunit MED8               |
| TGME49_220950 | 1.49  | 9.51  | 0.00179107 | 0.01507957 | hypothetical protein                        |
| TGME49_312105 | -1.90 | 6.27  | 0.00178639 | 0.01507957 | hypothetical protein                        |
| TGME49_254510 | 1.21  | 5.21  | 0.00179706 | 0.01511289 | ankyrin repeat-containing protein           |
| TGME49_261660 | 1.38  | 5.03  | 0.0018078  | 0.01516075 | hypothetical protein                        |
| TGME49_242030 | -1.58 | 5.29  | 0.0018089  | 0.01516075 | hypothetical protein                        |
| TGME49_221410 | -1.15 | 6.55  | 0.00181213 | 0.01517073 | actin-like protein ALP4                     |

|               |       |       |            |            |                                                                         |
|---------------|-------|-------|------------|------------|-------------------------------------------------------------------------|
| TGME49_228010 | -1.70 | 5.14  | 0.00182004 | 0.01521969 | hypothetical protein                                                    |
| TGME49_275420 | -1.19 | 6.14  | 0.00184023 | 0.01537121 | histone lysine-specific demethylase<br>LSD1/BHC110/KDMA1A               |
| TGME49_312420 | 0.88  | 8.00  | 0.00184727 | 0.01541267 | hypothetical protein                                                    |
| TGME49_281450 | -1.50 | 5.73  | 0.00186418 | 0.01551879 | cell-cycle-associated protein kinase, putative                          |
| TGME49_286790 | -1.22 | 6.11  | 0.00190561 | 0.01582812 | nuclear factor NF2                                                      |
| TGME49_202250 | 1.03  | 5.90  | 0.00191449 | 0.01588407 | hypothetical protein                                                    |
| TGME49_245460 | 3.64  | 12.61 | 0.00192745 | 0.0159737  | ribosomal protein RPS8                                                  |
| TGME49_208420 | 1.49  | 6.62  | 0.00194296 | 0.01599753 | Sodium:neurotransmitter symporter family protein                        |
| TGME49_288360 | 1.28  | 9.40  | 0.0019414  | 0.01599753 | tryptophanyl-tRNA synthetase (TrpRS2)                                   |
| TGME49_313970 | -2.25 | 5.18  | 0.00193704 | 0.01599753 | Phytanoyl-CoA dioxygenase (PhyH) superfamily<br>protein                 |
| TGME49_200595 | -7.22 | 4.67  | 0.00194328 | 0.01599753 | hypothetical protein                                                    |
| TGME49_262120 | -0.97 | 7.22  | 0.00194766 | 0.01601575 | IQ calmodulin-binding motif domain-containing<br>protein                |
| TGME49_203050 | 1.29  | 5.92  | 0.00197416 | 0.01621567 | AP2 domain transcription factor AP2V1a-6                                |
| TGME49_318650 | 0.90  | 8.08  | 0.0019926  | 0.01633013 | transhydrogenase                                                        |
| TGME49_254900 | 0.89  | 6.54  | 0.0019947  | 0.01633013 | proteasome subunit beta type 2, putative                                |
| TGME49_298070 | -2.10 | 5.47  | 0.00200947 | 0.01641477 | hypothetical protein                                                    |
| TGME49_318690 | 1.35  | 4.49  | 0.00201297 | 0.01641586 | RNA recognition motif-containing protein                                |
| TGME49_202540 | -0.98 | 7.57  | 0.00201404 | 0.01641586 | 3'-5'-cyclic nucleotide phosphodiesterase domain-<br>containing protein |
| TGME49_265390 | -1.28 | 6.56  | 0.00201892 | 0.01643757 | hypothetical protein                                                    |
| TGME49_311625 | -1.42 | 5.89  | 0.00202961 | 0.01648836 | WD domain, G-beta repeat-containing protein                             |
| TGME49_216510 | -1.35 | 5.83  | 0.00203782 | 0.01651883 | thioredoxin, putative                                                   |
| TGME49_313180 | -0.87 | 8.51  | 0.00204285 | 0.01652345 | cell-cycle-associated protein kinase PRP4, putative                     |
| TGME49_231370 | 1.26  | 5.17  | 0.00204928 | 0.01653933 | phospholipase, patatin family protein                                   |
| TGME49_226320 | -1.07 | 6.35  | 0.00207093 | 0.01669591 | hypothetical protein                                                    |
| TGME49_258826 | -1.97 | 4.89  | 0.00207953 | 0.01673609 | hypothetical protein                                                    |
| TGME49_290160 | -1.03 | 7.33  | 0.00209174 | 0.01680875 | sortilin, putative                                                      |
| TGME49_217400 | -1.37 | 6.47  | 0.00210943 | 0.01691428 | hypothetical protein                                                    |
| TGME49_250220 | 1.23  | 5.89  | 0.00211561 | 0.0169455  | hypothetical protein                                                    |
| TGME49_270330 | 1.36  | 5.83  | 0.00213638 | 0.01709171 | cell-cycle-associated protein kinase, putative                          |
| TGME49_304955 | 0.93  | 9.11  | 0.00213848 | 0.01709171 | serine/threonine specific protein phosphatase                           |
| TGME49_236870 | 1.69  | 6.81  | 0.00214253 | 0.01709332 | hypothetical protein                                                    |
| TGME49_301290 | -1.43 | 5.30  | 0.0021433  | 0.01709332 | hypothetical protein                                                    |
| TGME49_266690 | -0.95 | 7.30  | 0.00214805 | 0.01711278 | hypothetical protein                                                    |
| TGME49_251460 | -1.36 | 6.07  | 0.00218151 | 0.01734208 | hypothetical protein                                                    |
| TGME49_289140 | 0.87  | 6.35  | 0.00218544 | 0.01735469 | ribosomal protein l22/l43, putative                                     |
| TGME49_213480 | 2.09  | 5.16  | 0.00219359 | 0.01740079 | hypothetical protein                                                    |
| TGME49_272370 | 1.06  | 7.49  | 0.002202   | 0.01744875 | hypothetical protein                                                    |
| TGME49_214980 | 0.80  | 7.97  | 0.0022083  | 0.01746224 | hypothetical protein                                                    |
| TGME49_279420 | 1.17  | 7.69  | 0.00222931 | 0.01760871 | hypothetical protein                                                    |
| TGME49_266900 | 1.04  | 8.02  | 0.00223609 | 0.01764343 | cyclin, N-terminal domain-containing protein                            |
| TGME49_255400 | 1.35  | 5.36  | 0.00224216 | 0.01767252 | hypothetical protein                                                    |
| TGME49_318290 | -1.31 | 5.58  | 0.00226138 | 0.01778613 | hypothetical protein                                                    |
| TGME49_314790 | -1.48 | 6.88  | 0.00226088 | 0.01778613 | small nuclear ribonucleoprotein G, putative                             |
| TGME49_259990 | -1.01 | 6.56  | 0.00231232 | 0.01814827 | SAC3/GANP family protein                                                |
| TGME49_220230 | -1.27 | 5.76  | 0.00232082 | 0.01819574 | leucine rich repeat-containing protein                                  |
| TGME49_201710 | 1.23  | 5.63  | 0.00232775 | 0.01821152 | WD domain, G-beta repeat-containing protein                             |
| TGME49_319740 | -1.51 | 5.14  | 0.00232644 | 0.01821152 | transporter, major facilitator family protein                           |
| TGME49_310530 | -1.33 | 5.63  | 0.00236731 | 0.01845985 | SNF2 family N-terminal domain-containing protein                        |

|               |       |      |            |            |                                                                                   |
|---------------|-------|------|------------|------------|-----------------------------------------------------------------------------------|
| TGME49_293260 | 1.38  | 7.14 | 0.00241078 | 0.01871944 | ATPase/histidine kinase/DNA gyrase B/HSP90 domain-containing protein              |
| TGME49_212310 | 1.04  | 9.06 | 0.00240864 | 0.01871944 | vacuolar ATP synthetase                                                           |
| TGME49_215640 | -1.04 | 6.80 | 0.00241288 | 0.01871944 | zinc finger, C3HC4 type (RING finger) domain-containing protein                   |
| TGME49_225560 | -1.03 | 8.81 | 0.00242612 | 0.01880242 | hypothetical protein                                                              |
| TGME49_289910 | 0.80  | 7.75 | 0.00251343 | 0.01943843 | hypothetical protein                                                              |
| TGME49_226240 | 1.06  | 5.23 | 0.00251961 | 0.01946591 | bud site selection protein, putative                                              |
| TGME49_313590 | -1.47 | 5.92 | 0.00254953 | 0.01967654 | hypothetical protein                                                              |
| TGME49_201790 | -1.12 | 6.54 | 0.0025599  | 0.01973602 | FHA domain-containing protein                                                     |
| TGME49_285290 | 1.07  | 6.54 | 0.00257695 | 0.01984681 | hypothetical protein                                                              |
| TGME49_215250 | -1.94 | 5.14 | 0.00259271 | 0.01994742 | thiamin pyrophosphokinase, catalytic domain-containing protein                    |
| TGME49_232550 | 0.93  | 7.35 | 0.0025986  | 0.019972   | hypothetical protein                                                              |
| TGME49_278530 | 0.76  | 8.32 | 0.00261031 | 0.02002046 | multiprotein bridging factor type 1 family transcriptional co-activator, putative |
| TGME49_230490 | -1.20 | 6.28 | 0.00261663 | 0.02004819 | phosphatidylinositol-4-phosphate 5-kinase                                         |
| TGME49_210682 | 1.85  | 5.24 | 0.00263159 | 0.02010047 | hypothetical protein                                                              |
| TGME49_294790 | 0.85  | 8.88 | 0.00265473 | 0.02025634 | hypothetical protein                                                              |
| TGME49_218930 | 3.26  | 4.53 | 0.00267821 | 0.02039348 | BTB/POZ domain-containing protein                                                 |
| TGME49_319530 | -0.93 | 8.07 | 0.00267744 | 0.02039348 | splicing factor SF2                                                               |
| TGME49_247330 | -0.87 | 6.97 | 0.00269904 | 0.02053102 | hypothetical protein                                                              |
| TGME49_299070 | 0.88  | 6.57 | 0.0027028  | 0.0205385  | pyruvate kinase PyKII                                                             |
| TGME49_206680 | 1.12  | 5.62 | 0.00270764 | 0.02055419 | hypothetical protein                                                              |
| TGME49_240590 | 0.94  | 7.11 | 0.00272396 | 0.02065695 | DNA-directed RNA polymerase II RPB5                                               |
| TGME49_263060 | 1.13  | 7.25 | 0.00273752 | 0.02072879 | Proteasome/cyclosome repeat-containing protein                                    |
| TGME49_319930 | -1.27 | 6.12 | 0.00275175 | 0.02078259 | hypothetical protein                                                              |
| TGME49_214810 | 1.18  | 5.74 | 0.00276124 | 0.02083305 | hypothetical protein                                                              |
| TGME49_281570 | -1.42 | 5.86 | 0.00277174 | 0.02089097 | hypothetical protein                                                              |
| TGME49_292950 | 0.99  | 7.04 | 0.00279433 | 0.02103984 | hypothetical protein                                                              |
| TGME49_208590 | -1.04 | 7.09 | 0.00281248 | 0.021155   | vacuolar ATP synthase subunit 54kD, putative                                      |
| TGME49_273530 | -1.77 | 5.13 | 0.00287007 | 0.02156625 | flagellar associated protein                                                      |
| TGME49_227330 | 1.13  | 7.01 | 0.00288459 | 0.02163852 | hypothetical protein                                                              |
| TGME49_200450 | -1.67 | 4.90 | 0.00288553 | 0.02163852 | hypothetical protein                                                              |
| TGME49_253130 | 0.85  | 7.00 | 0.00290401 | 0.02175511 | transporter, major facilitator family protein                                     |
| TGME49_249670 | 0.96  | 7.83 | 0.00291232 | 0.0217577  | cathepsin B                                                                       |
| TGME49_235020 | -0.87 | 7.55 | 0.00290943 | 0.0217577  | COPI protein, putative                                                            |
| TGME49_216750 | -1.10 | 6.58 | 0.00291316 | 0.0217577  | Paf1/RNA polymerase II complex component LEO1                                     |
| TGME49_250955 | 1.57  | 5.63 | 0.0029175  | 0.02176816 | KRUF family protein                                                               |
| TGME49_229930 | 0.93  | 7.64 | 0.00293469 | 0.02183045 | p25-alpha family protein                                                          |
| TGME49_320000 | -1.35 | 5.47 | 0.00293217 | 0.02183045 | SCY kinase (incomplete catalytic triad)                                           |
| TGME49_313350 | -1.21 | 5.79 | 0.00294013 | 0.021849   | hypothetical protein                                                              |
| TGME49_293190 | -0.97 | 7.22 | 0.00294532 | 0.0218656  | endonuclease/exonuclease/phosphatase family protein                               |
| TGME49_240510 | 1.44  | 5.61 | 0.00295511 | 0.02188292 | hypothetical protein                                                              |
| TGME49_259720 | -1.18 | 6.13 | 0.00295651 | 0.02188292 | hypothetical protein                                                              |
| TGME49_273140 | -1.45 | 5.60 | 0.00295141 | 0.02188292 | radical SAM methylthiotransferase, MiaB/RimO family protein                       |
| TGME49_231120 | 1.02  | 5.98 | 0.00296934 | 0.02195595 | ribosomal protein S11, putative                                                   |
| TGME49_221190 | 1.32  | 5.16 | 0.00298089 | 0.02201936 | mrna cleavage factor family protein, putative                                     |
| TGME49_273380 | 1.10  | 5.22 | 0.00300883 | 0.0222036  | ion channel protein                                                               |
| TGME49_218610 | -1.45 | 5.39 | 0.0030137  | 0.02221744 | ATPase (DUF699) protein                                                           |
| TGME49_244570 | -1.74 | 5.07 | 0.00303224 | 0.02233187 | hypothetical protein                                                              |

|               |       |      |            |            |                                                                   |
|---------------|-------|------|------------|------------|-------------------------------------------------------------------|
| TGME49_221590 | 0.87  | 8.63 | 0.00307314 | 0.02261063 | dual specificity phosphatase, catalytic domain-containing protein |
| TGME49_263840 | -1.10 | 6.12 | 0.00309654 | 0.0227376  | hypothetical protein                                              |
| TGME49_233380 | 1.13  | 9.74 | 0.00310502 | 0.02277731 | hypothetical protein                                              |
| TGME49_269430 | -1.43 | 5.52 | 0.00311242 | 0.02280903 | polyprenyl synthetase superfamily protein                         |
| TGME49_319570 | -0.96 | 6.68 | 0.00311705 | 0.0228204  | WD domain, G-beta repeat-containing protein                       |
| TGME49_268380 | 2.05  | 6.24 | 0.0031238  | 0.02284724 | RNA recognition motif-containing protein                          |
| TGME49_310390 | 1.34  | 6.89 | 0.00314802 | 0.02293382 | hypothetical protein                                              |
| TGME49_231100 | 0.90  | 6.73 | 0.00314681 | 0.02293382 | hypothetical protein                                              |
| TGME49_269940 | -1.72 | 4.83 | 0.00314198 | 0.02293382 | zinc finger motif, C2HC5-type protein                             |
| TGME49_300060 | 1.00  | 6.85 | 0.00317782 | 0.02310549 | signal peptidase subunit protein                                  |
| TGME49_285490 | -1.37 | 5.79 | 0.0031751  | 0.02310549 | helix-hairpin-helix motif domain-containing protein               |
| TGME49_202300 | -1.24 | 5.80 | 0.00318859 | 0.02311572 | inosine triphosphate pyrophosphatase, putative                    |
| TGME49_258490 | -1.42 | 5.25 | 0.00318455 | 0.02311572 | hypothetical protein                                              |
| TGME49_201200 | -1.97 | 4.87 | 0.00318636 | 0.02311572 | zinc finger (CCCH type) motif-containing protein                  |
| TGME49_289600 | 0.79  | 8.48 | 0.00320105 | 0.02318333 | heat shock protein HSP29                                          |
| TGME49_248630 | -1.11 | 6.81 | 0.00320464 | 0.0231867  | actin-related protein ARP1                                        |
| TGME49_221440 | -1.36 | 5.23 | 0.00320944 | 0.02319876 | RPGR, putative                                                    |
| TGME49_242380 | -0.94 | 7.53 | 0.00323036 | 0.02328185 | fatty acid elongase                                               |
| TGME49_250690 | -0.83 | 8.66 | 0.00323667 | 0.02330465 | zinc finger (CCCH type) motif-containing protein                  |
| TGME49_244530 | 1.03  | 8.45 | 0.00324136 | 0.02331577 | hypothetical protein                                              |
| TGME49_315720 | -1.23 | 5.60 | 0.00325853 | 0.02339387 | Smg-4/UPF3 family protein                                         |
| TGME49_313385 | 1.23  | 5.33 | 0.00326791 | 0.02343846 | hypothetical protein                                              |
| TGME49_224070 | -1.32 | 5.80 | 0.00327493 | 0.02346611 | hypothetical protein                                              |
| TGME49_293900 | 1.04  | 7.90 | 0.00329082 | 0.02354945 | sporozoite protein with an altered thrombospondin repeat SPATR    |
| TGME49_247370 | -1.52 | 5.12 | 0.00329292 | 0.02354945 | hypothetical protein                                              |
| TGME49_263610 | -1.39 | 6.26 | 0.00329962 | 0.02357461 | hypothetical protein                                              |
| TGME49_216490 | -1.65 | 5.01 | 0.00331811 | 0.02368392 | hypothetical protein                                              |
| TGME49_308580 | -1.44 | 5.77 | 0.00332805 | 0.02373196 | Lon protease family protein                                       |
| TGME49_202240 | -2.25 | 4.63 | 0.00334989 | 0.02386478 | RAP domain-containing protein                                     |
| TGME49_246140 | -1.42 | 5.11 | 0.00336282 | 0.02393388 | hypothetical protein                                              |
| TGME49_294980 | 1.48  | 4.97 | 0.00337634 | 0.024007   | hypothetical protein                                              |
| TGME49_268220 | 4.47  | 4.65 | 0.00338535 | 0.024048   | hypothetical protein                                              |
| TGME49_316700 | 1.40  | 4.86 | 0.00341195 | 0.0242137  | uridine kinase                                                    |
| TGME49_277840 | 0.86  | 7.26 | 0.00341752 | 0.02423002 | Ras family protein                                                |
| TGME49_214490 | -1.37 | 5.48 | 0.00342106 | 0.02423193 | peptidase M16 inactive domain-containing protein                  |
| TGME49_233450 | 1.51  | 7.79 | 0.00342751 | 0.02425029 | SAG-related sequence SRS29A                                       |
| TGME49_229470 | -1.06 | 6.59 | 0.00345759 | 0.0244207  | hypothetical protein                                              |
| TGME49_246080 | -0.95 | 6.89 | 0.00346916 | 0.02447902 | NAD dependent epimerase/dehydratase family protein                |
| TGME49_227580 | -1.02 | 7.72 | 0.0034788  | 0.02452369 | transmembrane amino acid transporter protein                      |
| TGME49_253320 | 1.18  | 5.24 | 0.00354009 | 0.02493208 | hypothetical protein                                              |
| TGME49_265790 | 0.83  | 8.49 | 0.00356856 | 0.02508488 | hypothetical protein                                              |
| TGME49_246120 | 0.98  | 5.80 | 0.003572   | 0.02508527 | tetratricopeptide repeat-containing protein                       |
| TGME49_218570 | 0.92  | 6.13 | 0.00357882 | 0.02510935 | Nin one binding (NOB1) Zn-ribbon family protein                   |
| TGME49_291690 | -1.27 | 5.50 | 0.00360916 | 0.02527435 | hypothetical protein                                              |
| TGME49_237160 | -1.22 | 5.78 | 0.00361693 | 0.02530484 | hypothetical protein                                              |
| TGME49_318525 | -1.15 | 6.53 | 0.00363645 | 0.02541738 | hypothetical protein                                              |
| TGME49_297510 | -1.54 | 5.94 | 0.00366466 | 0.02559046 | hypothetical protein                                              |
| TGME49_268170 | -1.58 | 5.31 | 0.00369459 | 0.025758   | hypothetical protein                                              |
| TGME49_319900 | -1.12 | 6.85 | 0.00370348 | 0.02578859 | hypothetical protein                                              |
| TGME49_267580 | 1.62  | 5.90 | 0.00375445 | 0.026119   | cyclin2 related protein                                           |

|               |       |       |            |            |                                                                                      |
|---------------|-------|-------|------------|------------|--------------------------------------------------------------------------------------|
| TGME49_281910 | 1.21  | 5.48  | 0.00377925 | 0.02626688 | hypothetical protein                                                                 |
| TGME49_297230 | -1.25 | 6.27  | 0.00380929 | 0.02640288 | Vps53 family, N-terminal protein                                                     |
| TGME49_213800 | -0.89 | 8.01  | 0.00382702 | 0.02648638 | protein phosphatase 2b regulatory subunit, putative                                  |
| TGME49_313200 | -1.66 | 5.25  | 0.00383409 | 0.02648638 | leucine rich repeat-containing protein                                               |
| TGME49_278815 | -0.92 | 6.99  | 0.00384281 | 0.02650964 | hypothetical protein                                                                 |
| TGME49_225470 | 0.98  | 5.79  | 0.00386848 | 0.02661238 | peptide methionine sulfoxide reductase                                               |
| TGME49_215895 | 0.96  | 6.10  | 0.0038721  | 0.02661262 | AP2 domain-containing protein                                                        |
| TGME49_306310 | -0.96 | 6.30  | 0.00390059 | 0.02678359 | RecF/RecN/SMC N terminal domain-containing protein                                   |
| TGME49_255900 | 0.75  | 8.26  | 0.00392374 | 0.0268728  | Bax inhibitor-1, putative                                                            |
| TGME49_218600 | -1.24 | 5.47  | 0.00392447 | 0.0268728  | RNA recognition motif-containing protein                                             |
| TGME49_309380 | -1.21 | 6.32  | 0.00393995 | 0.0269539  | Nuf2                                                                                 |
| TGME49_200430 | -1.64 | 5.09  | 0.00396273 | 0.02705976 | cytidine and deoxycytidylate deaminase zinc-binding region domain-containing protein |
| TGME49_237410 | -1.14 | 6.56  | 0.00397944 | 0.02714887 | protein phosphatase 2C domain-containing protein                                     |
| TGME49_210360 | 1.08  | 5.56  | 0.00400217 | 0.02719745 | DEAD (Asp-Glu-Ala-Asp) box polypeptide 41 family protein                             |
| TGME49_216435 | -1.06 | 6.22  | 0.00399763 | 0.02719745 | hypothetical protein                                                                 |
| TGME49_289180 | -1.13 | 5.71  | 0.00400264 | 0.02719745 | thioredoxin family redox-active protein, putative                                    |
| TGME49_301380 | -1.44 | 5.62  | 0.00400492 | 0.02719745 | elongation factor Tu GTP binding domain-containing protein                           |
| TGME49_213900 | -0.88 | 7.16  | 0.00402708 | 0.02732295 | regulator of chromosome condensation RCC1                                            |
| TGME49_308075 | -0.99 | 6.78  | 0.00404149 | 0.0273956  | hypothetical protein                                                                 |
| TGME49_207900 | -1.09 | 6.22  | 0.00407533 | 0.02757452 | transcription initiation factor TFIIIB                                               |
| TGME49_268210 | -1.35 | 5.24  | 0.00408008 | 0.02758146 | AGC kinase                                                                           |
| TGME49_268980 | 0.81  | 8.08  | 0.00409304 | 0.02764388 | hypothetical protein                                                                 |
| TGME49_266070 | 1.28  | 10.10 | 0.00413331 | 0.02789043 | ribosomal protein RPL31                                                              |
| TGME49_201220 | -1.39 | 5.67  | 0.00414379 | 0.02793572 | zinc finger protein                                                                  |
| TGME49_205700 | 1.33  | 10.39 | 0.00417889 | 0.02812119 | cyclophilin precursor                                                                |
| TGME49_224480 | -1.03 | 6.40  | 0.00417786 | 0.02812119 | cell-cycle-associated protein kinase CLK, putative                                   |
| TGME49_204055 | -1.67 | 5.00  | 0.00419787 | 0.02822325 | hypothetical protein                                                                 |
| TGME49_223540 | -1.08 | 6.49  | 0.00426374 | 0.02861246 | importin-beta N-terminal domain-containing protein                                   |
| TGME49_319710 | -1.20 | 6.20  | 0.00426735 | 0.02861246 | kinesin motor domain-containing protein                                              |
| TGME49_228980 | -1.55 | 4.98  | 0.00427457 | 0.02863501 | hypothetical protein                                                                 |
| TGME49_267450 | -1.25 | 6.10  | 0.00431001 | 0.02884628 | alpha-tubulin suppressor protein                                                     |
| TGME49_235398 | -1.20 | 5.54  | 0.00432251 | 0.02887783 | hypothetical protein                                                                 |
| TGME49_209930 | -1.40 | 5.64  | 0.00431873 | 0.02887783 | hypothetical protein                                                                 |
| TGME49_236010 | 0.76  | 8.24  | 0.00433761 | 0.0289265  | prenylcysteine oxidase                                                               |
| TGME49_236630 | 0.79  | 7.95  | 0.00435576 | 0.02902143 | hypothetical protein                                                                 |
| TGME49_218520 | 1.39  | 10.64 | 0.00437683 | 0.02910944 | microneme protein MIC6                                                               |
| TGME49_275610 | -1.03 | 8.30  | 0.00437665 | 0.02910944 | protein kinase, other                                                                |
| TGME49_301130 | -1.69 | 5.52  | 0.00438957 | 0.02916799 | hypothetical protein                                                                 |
| TGME49_225800 | 0.91  | 6.01  | 0.0044123  | 0.02922495 | iron-sulfur assembly ATPase                                                          |
| TGME49_278450 | 0.78  | 7.85  | 0.00441311 | 0.02922495 | hypothetical protein                                                                 |
| TGME49_222120 | -1.52 | 5.28  | 0.00440753 | 0.02922495 | hypothetical protein                                                                 |
| TGME49_235540 | 0.92  | 8.28  | 0.00441878 | 0.02922549 | eukaryotic initiation factor-2 beta, putative                                        |
| TGME49_263595 | -1.37 | 5.60  | 0.00442189 | 0.02922549 | RNA-binding protein                                                                  |
| TGME49_225250 | 0.88  | 5.81  | 0.00446629 | 0.02937812 | LSU ribosomal protein L14P, putative                                                 |
| TGME49_235880 | 0.82  | 7.65  | 0.00445284 | 0.02937812 | brain protein 44 family protein                                                      |
| TGME49_265840 | -1.01 | 6.56  | 0.00446877 | 0.02937812 | hypothetical protein                                                                 |
| TGME49_213460 | -1.05 | 6.67  | 0.00446337 | 0.02937812 | hypothetical protein                                                                 |

|               |       |       |            |            |                                                            |
|---------------|-------|-------|------------|------------|------------------------------------------------------------|
| TGME49_291120 | -1.11 | 5.77  | 0.00446403 | 0.02937812 | trafficking protein mon1 subfamily protein                 |
| TGME49_246760 | -2.02 | 4.72  | 0.00445435 | 0.02937812 | hypothetical protein                                       |
| TGME49_213790 | -1.09 | 6.02  | 0.00447285 | 0.02937888 | hypothetical protein                                       |
| TGME49_253300 | 1.61  | 4.67  | 0.00448013 | 0.02940063 | hypothetical protein                                       |
| TGME49_215400 | -1.61 | 5.40  | 0.00448924 | 0.02943429 | RNA recognition motif-containing protein                   |
| TGME49_250950 | 1.30  | 5.22  | 0.00451669 | 0.029562   | KRUF family protein                                        |
| TGME49_262910 | 1.44  | 4.81  | 0.00458498 | 0.02995004 | NADH-cytochrome b5 reductase 1, putative                   |
| TGME49_224310 | -1.12 | 6.08  | 0.00458593 | 0.02995004 | DHHC zinc finger domain-containing protein                 |
| TGME49_313480 | -2.19 | 4.81  | 0.00458811 | 0.02995004 | hypothetical protein                                       |
| TGME49_285840 | -1.13 | 5.72  | 0.00461352 | 0.03008943 | RAP domain-containing protein                              |
| TGME49_257530 | 1.55  | 11.03 | 0.00462602 | 0.03014443 | transporter, major facilitator family protein              |
| TGME49_232630 | 0.73  | 8.16  | 0.00463952 | 0.03019404 | hypothetical protein                                       |
| TGME49_232050 | -0.93 | 7.68  | 0.00464179 | 0.03019404 | DnaJ domain-containing protein                             |
| TGME49_285510 | 0.78  | 7.41  | 0.00464631 | 0.03019693 | hypothetical protein                                       |
| TGME49_269410 | 1.18  | 5.26  | 0.00465321 | 0.03020407 | hypothetical protein                                       |
| TGME49_272030 | -1.05 | 6.10  | 0.00465556 | 0.03020407 | kelch repeat-containing protein                            |
| TGME49_231950 | 0.82  | 7.69  | 0.00466209 | 0.03021998 | hypothetical protein                                       |
| TGME49_254620 | 1.10  | 9.88  | 0.00469908 | 0.03040654 | ribosomal protein RPL39                                    |
| TGME49_210255 | 0.81  | 6.96  | 0.00472189 | 0.030479   | hypothetical protein                                       |
| TGME49_205670 | 0.79  | 7.31  | 0.00472262 | 0.030479   | SF-assemblin/beta giardin protein                          |
| TGME49_248570 | -1.51 | 5.00  | 0.00471588 | 0.030479   | hypothetical protein                                       |
| TGME49_320650 | -1.43 | 4.91  | 0.00473721 | 0.03054653 | ankyrin repeat-containing protein                          |
| TGME49_248690 | -1.32 | 5.60  | 0.00474817 | 0.03059059 | hypothetical protein                                       |
| TGME49_221580 | -0.96 | 6.88  | 0.00480193 | 0.03088322 | ribosomal RNA large subunit methyltransferase J protein    |
| TGME49_312260 | -1.13 | 5.95  | 0.0047986  | 0.03088322 | hypothetical protein                                       |
| TGME49_249010 | 0.83  | 7.09  | 0.00484612 | 0.03111343 | hypothetical protein                                       |
| TGME49_237840 | -1.28 | 5.50  | 0.00486648 | 0.03119008 | hypothetical protein                                       |
| TGME49_239087 | -1.40 | 5.24  | 0.00491434 | 0.03146963 | hypothetical protein                                       |
| TGME49_253740 | -1.12 | 5.77  | 0.00492475 | 0.03150903 | hypothetical protein                                       |
| TGME49_270140 | -1.27 | 5.92  | 0.00494228 | 0.0315186  | splicing factor DIM1, putative                             |
| TGME49_211330 | -1.87 | 4.59  | 0.00493663 | 0.0315186  | methionine aminopeptidase                                  |
| TGME49_233838 | -1.99 | 4.53  | 0.00493635 | 0.0315186  | PET112 family, C terminal region domain-containing protein |
| TGME49_261460 | -1.01 | 7.09  | 0.00499236 | 0.03177696 | transcriptional elongation factor FACT80                   |
| TGME49_226270 | 0.91  | 5.99  | 0.00499846 | 0.03178847 | hypothetical protein                                       |
| TGME49_246970 | -1.31 | 5.30  | 0.00508832 | 0.03233221 | 3'-5' exonuclease domain-containing protein                |
| TGME49_237500 | 0.84  | 7.29  | 0.0050997  | 0.03237677 | protein phosphatase 2C domain-containing protein           |
| TGME49_268900 | -1.22 | 5.76  | 0.00515323 | 0.03268858 | dense granular protein GRA10                               |
| TGME49_310230 | -1.13 | 6.60  | 0.00516003 | 0.0326969  | hypothetical protein                                       |
| TGME49_244870 | -1.10 | 5.84  | 0.00517768 | 0.03275955 | quinone oxidoreductase, putative                           |
| TGME49_298990 | 0.89  | 5.96  | 0.00522945 | 0.03300253 | ferredoxin NADP+ oxidoreductase FNR                        |
| TGME49_299270 | 1.01  | 5.30  | 0.00524668 | 0.03308314 | hypothetical protein                                       |
| TGME49_226830 | -0.98 | 8.44  | 0.00526712 | 0.03316934 | DnaK family protein                                        |
| TGME49_268580 | -1.03 | 6.39  | 0.00527379 | 0.03316934 | hypothetical protein                                       |
| TGME49_253560 | 0.99  | 5.72  | 0.0052825  | 0.03319594 | hypothetical protein                                       |
| TGME49_229340 | -1.63 | 4.98  | 0.00531199 | 0.03335302 | hypothetical protein                                       |
| TGME49_258180 | -1.49 | 4.83  | 0.00531657 | 0.03335351 | hypothetical protein                                       |
| TGME49_244220 | -1.97 | 4.51  | 0.00533309 | 0.03342879 | hypothetical protein                                       |
| TGME49_276170 | 0.73  | 8.59  | 0.00534184 | 0.03345537 | phosphatidylinositol 3- and 4-kinase                       |
| TGME49_202420 | 1.43  | 5.50  | 0.00536435 | 0.03355536 | hypothetical protein                                       |
| TGME49_235490 | -0.90 | 6.76  | 0.00536686 | 0.03355536 | hypothetical protein                                       |
| TGME49_208030 | 1.24  | 10.29 | 0.00538211 | 0.03362228 | microneme protein MIC4                                     |

|               |       |      |            |            |                                                                  |
|---------------|-------|------|------------|------------|------------------------------------------------------------------|
| TGME49_312500 | -0.98 | 6.61 | 0.00538903 | 0.03363719 | hypothetical protein                                             |
| TGME49_273770 | 0.86  | 7.75 | 0.00546748 | 0.03399171 | hypothetical protein                                             |
| TGME49_242260 | -1.23 | 5.84 | 0.00546877 | 0.03399171 | hypothetical protein                                             |
| TGME49_245428 | 1.44  | 5.35 | 0.00547464 | 0.03399965 | hypothetical protein                                             |
| TGME49_213388 | -1.41 | 5.26 | 0.00550065 | 0.03413259 | hypothetical protein                                             |
| TGME49_311250 | -1.11 | 5.97 | 0.0055207  | 0.03421125 | hypothetical protein                                             |
| TGME49_273400 | -1.55 | 5.01 | 0.00552718 | 0.03421125 | hypothetical protein                                             |
| TGME49_215990 | -1.45 | 5.28 | 0.00555031 | 0.03432574 | helicase, putative                                               |
| TGME49_217820 | -0.93 | 7.80 | 0.0055764  | 0.03443246 | PCI domain-containing protein                                    |
| TGME49_294060 | 0.97  | 6.68 | 0.00558967 | 0.03447324 | hypothetical protein                                             |
| TGME49_318580 | -0.96 | 6.23 | 0.00559568 | 0.03447324 | glucosephosphate-mutase GPM2                                     |
| TGME49_219070 | -0.99 | 6.86 | 0.00561056 | 0.03452542 | cyclic nucleotide-binding domain-containing protein              |
| TGME49_213600 | 1.73  | 4.46 | 0.00561528 | 0.03452582 | hypothetical protein                                             |
| TGME49_206600 | -1.24 | 5.46 | 0.00562796 | 0.03457509 | sigma-70, region 3 protein                                       |
| TGME49_266850 | 1.02  | 5.79 | 0.0056452  | 0.0346414  | 3-demethylubiquinone-9 3-O-methyltransferase                     |
| TGME49_239600 | 1.33  | 5.83 | 0.00567069 | 0.03472246 | rhoptyr kinase family protein ROP23 (incomplete catalytic triad) |
| TGME49_315590 | -1.24 | 5.72 | 0.00566621 | 0.03472246 | macro domain-containing protein                                  |
| TGME49_211410 | -1.26 | 6.19 | 0.00572769 | 0.03504251 | translation initiation factor sui1 protein                       |
| TGME49_219820 | 1.02  | 7.81 | 0.00574664 | 0.03510048 | polyubiquitin UbC, putative                                      |
| TGME49_216760 | -1.38 | 5.08 | 0.00577326 | 0.03523399 | RNA pseudouridine synthase superfamily protein                   |
| TGME49_221200 | 0.86  | 6.67 | 0.0057946  | 0.03533513 | CW-type Zinc Finger protein                                      |
| TGME49_206415 | -0.99 | 6.32 | 0.00580537 | 0.03537169 | myosin K                                                         |
| TGME49_213820 | 0.89  | 6.73 | 0.00581663 | 0.03541119 | hypothetical protein                                             |
| TGME49_232640 | 1.17  | 5.17 | 0.00585027 | 0.03549933 | RNA 2'-phosphotransferase, Tpt1/KptA family protein              |
| TGME49_286720 | 0.86  | 6.76 | 0.00584587 | 0.03549933 | heat shock protein HSP28                                         |
| TGME49_243340 | -1.43 | 5.11 | 0.00584731 | 0.03549933 | atypical MEK-related kinase (incomplete catalytic triad)         |
| TGME49_270450 | -1.71 | 4.65 | 0.00584977 | 0.03549933 | MCM2/3/5 family protein                                          |
| TGME49_254290 | 1.01  | 5.58 | 0.00589265 | 0.03572722 | hypothetical protein                                             |
| TGME49_236240 | -0.96 | 6.17 | 0.00594119 | 0.03597696 | Tyrosine kinase-like (TKL) protein                               |
| TGME49_247680 | -1.68 | 5.02 | 0.00594356 | 0.03597696 | hypothetical protein                                             |
| TGME49_258105 | -1.98 | 4.46 | 0.00595484 | 0.03601586 | hypothetical protein                                             |
| TGME49_313760 | 0.81  | 7.74 | 0.0059722  | 0.0360877  | hypothetical protein                                             |
| TGME49_246800 | -1.04 | 6.38 | 0.00598084 | 0.0360877  | acylaminoacyl-peptidase, putative                                |
| TGME49_262740 | -1.64 | 4.58 | 0.00598133 | 0.0360877  | hypothetical protein                                             |
| TGME49_237550 | 1.49  | 5.18 | 0.00602042 | 0.03622681 | hypothetical protein                                             |
| TGME49_298970 | 0.88  | 6.90 | 0.00602323 | 0.03622681 | LSM3, U6 small nuclear RNA associated isoform 2 family protein   |
| TGME49_313120 | -1.89 | 4.63 | 0.00610841 | 0.03670498 | DNA-directed RNA polymerase, alpha subunit                       |
| TGME49_229490 | -0.97 | 6.52 | 0.00612318 | 0.03676386 | tetratricopeptide repeat-containing protein                      |
| TGME49_219170 | -0.87 | 6.82 | 0.00613032 | 0.03677695 | hypothetical protein                                             |
| TGME49_238170 | 1.16  | 5.73 | 0.00618323 | 0.03703438 | hypothetical protein                                             |
| TGME49_201880 | 0.72  | 8.04 | 0.006205   | 0.03713475 | hypothetical protein                                             |
| TGME49_246090 | -1.11 | 6.69 | 0.00622272 | 0.03715077 | hypothetical protein                                             |
| TGME49_278540 | 0.93  | 7.28 | 0.00626267 | 0.03732916 | hypothetical protein                                             |
| TGME49_236050 | -2.92 | 4.86 | 0.00630852 | 0.03757223 | fructose-bisphosphate aldolase, putative                         |
| TGME49_307610 | -0.87 | 6.49 | 0.00633675 | 0.03771    | elongation factor TS, putative                                   |
| TGME49_249810 | -1.68 | 4.81 | 0.00644532 | 0.03820271 | activating signal cointegrator 1 complex subunit 3, putative     |
| TGME49_299980 | 0.75  | 7.27 | 0.00647818 | 0.03833615 | hypothetical protein                                             |
| TGME49_223590 | 0.69  | 8.22 | 0.00647488 | 0.03833615 | proteasome subunit                                               |



|               |       |       |            |            |                                                                  |
|---------------|-------|-------|------------|------------|------------------------------------------------------------------|
| TGME49_213910 | -1.12 | 5.99  | 0.00651287 | 0.03851068 | hypothetical protein                                             |
| TGME49_289620 | 0.81  | 8.43  | 0.00654068 | 0.03861344 | cathepsin CPC1                                                   |
| TGME49_277770 | -1.42 | 5.35  | 0.00656808 | 0.03874434 | hypothetical protein                                             |
| TGME49_305950 | 1.09  | 5.38  | 0.0065792  | 0.03877906 | tetratricopeptide repeat-containing protein                      |
| TGME49_215530 | 0.97  | 9.69  | 0.00658805 | 0.03880034 | hypothetical protein                                             |
| TGME49_231140 | 2.39  | 11.22 | 0.00662415 | 0.03898197 | ribosomal protein RPS25                                          |
| TGME49_238230 | 0.85  | 5.98  | 0.00663918 | 0.03902328 | Ser/Thr phosphatase family protein                               |
| TGME49_230410 | -1.11 | 8.15  | 0.00666705 | 0.03907925 | peroxiredoxin PRX3                                               |
| TGME49_229620 | -1.21 | 5.36  | 0.00665985 | 0.03907925 | hypothetical protein                                             |
| TGME49_315820 | -1.15 | 5.93  | 0.00669693 | 0.03922335 | hypothetical protein                                             |
| TGME49_304520 | -0.94 | 6.73  | 0.00671794 | 0.03927838 | hypothetical protein                                             |
| TGME49_309580 | -1.05 | 6.11  | 0.00671543 | 0.03927838 | transporter, major facilitator family protein                    |
| TGME49_280710 | -1.05 | 8.04  | 0.00672223 | 0.03927838 | 20S proteasome subunit beta 7, putative                          |
| TGME49_227335 | 1.44  | 5.11  | 0.00673195 | 0.03928573 | hypothetical protein                                             |
| TGME49_209020 | -1.85 | 4.48  | 0.00673409 | 0.03928573 | hypothetical protein                                             |
| TGME49_216650 | 0.72  | 8.30  | 0.00678833 | 0.0395399  | S15 sporozoite-expressed protein                                 |
| TGME49_207420 | 0.81  | 6.43  | 0.00680087 | 0.03958182 | hypothetical protein                                             |
| TGME49_305120 | 1.05  | 6.89  | 0.0068113  | 0.03961138 | transporter, solute:sodium symporter (SSS) family protein        |
| TGME49_235920 | -1.00 | 6.30  | 0.00681993 | 0.03963047 | dynein, axonemal, heavy chain 2 family protein                   |
| TGME49_228360 | 0.88  | 7.28  | 0.0068272  | 0.03964163 | peptidyl-prolyl isomerase FKBP12, putative                       |
| TGME49_220330 | -1.48 | 4.86  | 0.00685146 | 0.03972024 | hypothetical protein                                             |
| TGME49_259630 | 0.85  | 8.88  | 0.00689029 | 0.03991412 | hypothetical protein                                             |
| TGME49_227060 | -1.03 | 5.79  | 0.00692767 | 0.04006798 | hypothetical protein                                             |
| TGME49_223410 | 0.85  | 7.90  | 0.00693929 | 0.0401039  | eukaryotic initiation factor-4E, putative                        |
| TGME49_321650 | -0.79 | 7.42  | 0.00697864 | 0.04029986 | hypothetical protein                                             |
| TGME49_271030 | 1.47  | 6.63  | 0.00700483 | 0.0403555  | AP2 domain transcription factor AP2VIII-6                        |
| TGME49_298050 | -1.10 | 5.70  | 0.007      | 0.0403555  | hypothetical protein                                             |
| TGME49_221330 | -1.02 | 6.74  | 0.00708536 | 0.04069414 | DNA gyrase/topoisomerase IV, A subunit domain-containing protein |
| TGME49_220510 | 1.22  | 6.04  | 0.00710918 | 0.04079931 | hypothetical protein                                             |
| TGME49_233830 | -1.85 | 4.60  | 0.00713276 | 0.04090294 | hypothetical protein                                             |
| TGME49_310470 | 0.80  | 8.64  | 0.00718156 | 0.04115093 | cytochrome C oxidase subunit IIb, putative                       |
| TGME49_233480 | 1.85  | 12.19 | 0.00724072 | 0.04145786 | SAG-related sequence SRS29C                                      |
| TGME49_312670 | -1.43 | 4.82  | 0.00727682 | 0.0416324  | hypothetical protein                                             |
| TGME49_258480 | -0.96 | 6.60  | 0.00739188 | 0.04225807 | hypothetical protein                                             |
| TGME49_212130 | -1.06 | 6.44  | 0.00743415 | 0.04246695 | phospholipase, patatin family protein                            |
| TGME49_289680 | 0.82  | 7.08  | 0.00746259 | 0.04254956 | Ras-related protein Rab11                                        |
| TGME49_212200 | -1.40 | 5.65  | 0.00748047 | 0.04260013 | hypothetical protein                                             |
| TGME49_214840 | 0.81  | 9.20  | 0.00752872 | 0.0427763  | AP2 domain transcription factor AP2X-7                           |
| TGME49_214150 | -1.32 | 6.36  | 0.00762878 | 0.0432453  | mitochondrial inner membrane translocase subunit TIM17, putative |
| TGME49_214780 | -1.33 | 5.82  | 0.00763779 | 0.04326329 | hydrolase, NUDIX family protein                                  |
| TGME49_207800 | 0.92  | 5.84  | 0.00767059 | 0.04336372 | hypothetical protein                                             |
| TGME49_224520 | -0.76 | 7.89  | 0.00766751 | 0.04336372 | alveolin domain containing intermediate filament IMC8            |
| TGME49_259950 | 0.86  | 6.67  | 0.00770039 | 0.04346    | carbonate dehydratase, eukaryotic-type domain-containing protein |
| TGME49_203700 | 0.94  | 6.22  | 0.00776428 | 0.04371242 | SFT2 family protein                                              |
| TGME49_209570 | 0.97  | 5.47  | 0.0077864  | 0.04377124 | suppressor of mitotic defects protein                            |
| TGME49_309090 | -1.08 | 5.89  | 0.00778654 | 0.04377124 | hypothetical protein                                             |
| TGME49_225160 | 0.81  | 7.50  | 0.00781852 | 0.0438844  | hypothetical protein                                             |
| TGME49_293760 | 0.71  | 7.69  | 0.0078136  | 0.0438844  | EF hand domain-containing protein                                |

|               |       |       |            |            |                                                                               |
|---------------|-------|-------|------------|------------|-------------------------------------------------------------------------------|
| TGME49_270770 | -0.99 | 6.32  | 0.00787269 | 0.04415279 | PWI domain-containing protein                                                 |
| TGME49_228110 | -1.12 | 6.14  | 0.00787825 | 0.04415279 | hypothetical protein                                                          |
| TGME49_265650 | -1.18 | 5.56  | 0.0079293  | 0.0444053  | protein phosphatase 2C domain-containing protein                              |
| TGME49_288580 | 1.40  | 4.44  | 0.00794945 | 0.04444417 | RNA methylase, putative                                                       |
| TGME49_268280 | -0.76 | 7.44  | 0.00794844 | 0.04444417 | 'chromo' (CHRromatin Organization MODifier) domain-containing protein         |
| TGME49_310870 | -1.03 | 6.08  | 0.00796024 | 0.04444417 | integral membrane protein, putative                                           |
| TGME49_320480 | -0.83 | 7.01  | 0.008016   | 0.04465454 | Rab11b                                                                        |
| TGME49_241150 | -1.02 | 6.51  | 0.00800406 | 0.04465454 | hypothetical protein                                                          |
| TGME49_218260 | 1.31  | 10.76 | 0.00805397 | 0.04466455 | histone H3.3                                                                  |
| TGME49_240500 | 0.99  | 5.76  | 0.00804494 | 0.04466455 | hypothetical protein                                                          |
| TGME49_295410 | -0.98 | 6.10  | 0.00805265 | 0.04466455 | transcription initiation factor TFIID complex subunit TAF6                    |
| TGME49_315660 | -1.25 | 5.51  | 0.00802696 | 0.04466455 | hypothetical protein                                                          |
| TGME49_290330 | -1.39 | 5.28  | 0.00803448 | 0.04466455 | chloride transporter, chloride channel (ClC) family protein                   |
| TGME49_269130 | -1.63 | 4.97  | 0.00804621 | 0.04466455 | hypothetical protein                                                          |
| TGME49_310730 | -0.94 | 6.24  | 0.00806559 | 0.04469554 | hypothetical protein                                                          |
| TGME49_293180 | 0.77  | 8.77  | 0.0080825  | 0.04471785 | NADP-specific glutamate dehydrogenase                                         |
| TGME49_297710 | -1.42 | 6.65  | 0.00808788 | 0.04471785 | hypothetical protein                                                          |
| TGME49_272400 | -1.45 | 5.54  | 0.0080773  | 0.04471785 | casein kinase ii regulatory subunit protein                                   |
| TGME49_232390 | -1.67 | 5.02  | 0.00809376 | 0.04471785 | 18S rRNA biogenesis protein RCL1 protein                                      |
| TGME49_267680 | -1.03 | 6.31  | 0.00811196 | 0.04478053 | microneme protein MIC12                                                       |
| TGME49_249560 | -1.17 | 5.43  | 0.00811719 | 0.04478053 | DNA-directed RNA polymerase alpha chain rpoA                                  |
| TGME49_253540 | 1.00  | 5.61  | 0.00815873 | 0.04495053 | hypothetical protein                                                          |
| TGME49_220460 | -1.73 | 4.82  | 0.00816014 | 0.04495053 | SNF7 family protein                                                           |
| TGME49_216460 | 0.89  | 6.86  | 0.00817029 | 0.04497301 | hypothetical protein                                                          |
| TGME49_235500 | -1.48 | 5.80  | 0.00820078 | 0.04510734 | hypothetical protein                                                          |
| TGME49_253730 | 0.96  | 6.80  | 0.00822704 | 0.04520078 | importin-beta N-terminal domain-containing protein                            |
| TGME49_294220 | 0.93  | 6.10  | 0.00822997 | 0.04520078 | hypothetical protein                                                          |
| TGME49_232130 | -0.77 | 8.66  | 0.00823656 | 0.04520345 | hypothetical protein                                                          |
| TGME49_209080 | 2.34  | 4.87  | 0.00826631 | 0.04533313 | transport protein particle (trapp) component, bet3 protein                    |
| TGME49_252390 | 0.73  | 8.34  | 0.00835529 | 0.04571849 | hypothetical protein                                                          |
| TGME49_251640 | -1.13 | 5.81  | 0.00836126 | 0.04571849 | ubiquitin-conjugating enzyme subfamily protein                                |
| TGME49_209200 | 0.83  | 7.04  | 0.00837174 | 0.04574205 | hypothetical protein                                                          |
| TGME49_321170 | 1.06  | 4.77  | 0.00844552 | 0.04611117 | Toxoplasma gondii family C protein                                            |
| TGME49_225060 | -0.95 | 6.75  | 0.00846566 | 0.04615312 | nucleoredoxin family protein                                                  |
| TGME49_306610 | -1.45 | 4.93  | 0.00846097 | 0.04615312 | 3' exoribonuclease family, domain 1 domain-containing protein                 |
| TGME49_265410 | 1.20  | 5.34  | 0.00851115 | 0.04633291 | G-protein beta WD-40 repeat containing protein                                |
| TGME49_312950 | 0.82  | 6.41  | 0.00850989 | 0.04633291 | hypothetical protein                                                          |
| TGME49_295125 | 1.05  | 10.03 | 0.00853138 | 0.04640896 | rhoptry protein ROP4                                                          |
| TGME49_220350 | -1.05 | 6.07  | 0.0086097  | 0.0467663  | tRNA ligases class II (D, K and N) domain-containing protein                  |
| TGME49_289780 | 0.98  | 5.49  | 0.00863965 | 0.04689465 | ATP-dependent hsl protease ATP-binding subunit hslU, putative                 |
| TGME49_289110 | -1.75 | 4.62  | 0.0086863  | 0.04707886 | hypothetical protein                                                          |
| TGME49_223530 | 1.04  | 6.77  | 0.00870489 | 0.04711066 | hypothetical protein                                                          |
| TGME49_263130 | 0.88  | 7.88  | 0.00873015 | 0.04721291 | citrate synthase, putative                                                    |
| TGME49_295050 | -0.97 | 6.08  | 0.00874009 | 0.0472322  | tRNA ligase class II core domain (G, H, P, S and T) domain-containing protein |

|               |       |      |            |            |                                         |
|---------------|-------|------|------------|------------|-----------------------------------------|
| TGME49_224350 | -0.82 | 8.27 | 0.00884632 | 0.04777143 | aminopeptidase N, putative              |
| TGME49_314660 | -0.96 | 6.93 | 0.00892555 | 0.04812925 | TPRX1 protein                           |
| TGME49_230220 | -0.92 | 6.18 | 0.00895119 | 0.04819724 | hypothetical protein                    |
| TGME49_231750 | -1.19 | 5.72 | 0.00901438 | 0.04850221 | hypothetical protein                    |
| TGME49_291630 | -1.59 | 5.63 | 0.00907342 | 0.04874905 | hypothetical protein                    |
| TGME49_270690 | -0.96 | 6.29 | 0.00910179 | 0.04886605 | arginyl-tRNA synthetase                 |
| TGME49_282000 | 1.40  | 6.18 | 0.00913145 | 0.04888363 | hypothetical protein                    |
| TGME49_254090 | 0.96  | 6.12 | 0.009119   | 0.04888363 | hypothetical protein                    |
| TGME49_236030 | -1.72 | 4.52 | 0.00912723 | 0.04888363 | hypothetical protein                    |
| TGME49_247960 | 1.49  | 5.74 | 0.00914671 | 0.04892996 | hypothetical protein                    |
| TGME49_260670 | -1.26 | 5.75 | 0.0091724  | 0.04903199 | centrin, putative                       |
| TGME49_283860 | -1.48 | 5.12 | 0.00918716 | 0.0490401  | leucine rich repeat-containing protein  |
| TGME49_272010 | -1.23 | 6.93 | 0.00929363 | 0.04957271 | Gar1 protein RNA binding region protein |
| TGME49_301340 | -0.84 | 6.38 | 0.00931391 | 0.04964516 | DnaJ domain-containing protein          |
| TGME49_254280 | 1.24  | 4.76 | 0.00935207 | 0.04977693 | DNA-directed RNA polymerase III RPC9    |

**Supplementary Table S5C: Differential expression analysis of *T. gondii* genes from MM6 cells infected with *T. gondii* EGS strain for 18 hours compared to *T. gondii* gene expression from MM6 cells infected with VEG strain for 18 hours.**

| gene ID       | logFC (EGS/VEG) | logCPM | PValue   | FDR      | Product Name                                                  |
|---------------|-----------------|--------|----------|----------|---------------------------------------------------------------|
| TGME49_205250 | 7.91            | 9.50   | 5.79E-55 | 4.29E-51 | rhoptry protein ROP18                                         |
| TGME49_322200 | 8.72            | 6.25   | 1.82E-51 | 6.75E-48 | apocytochrome b, putative                                     |
| TGME49_232955 | 6.65            | 8.96   | 9.66E-50 | 2.39E-46 | hypothetical protein                                          |
| TGME49_323400 | 8.19            | 9.09   | 1.19E-48 | 2.21E-45 | cytochrome c oxidase subunit iii subfamily protein            |
| TGME49_214080 | 7.75            | 8.54   | 2.19E-44 | 3.25E-41 | toxofilin                                                     |
| TGME49_206550 | 6.27            | 5.45   | 1.07E-40 | 1.32E-37 | hypothetical protein                                          |
| TGME49_280570 | 5.07            | 7.23   | 1.14E-32 | 1.20E-29 | SAG-related sequence SRS35A                                   |
| TGME49_330000 | 7.63            | 9.81   | 3.49E-25 | 3.23E-22 | cytochrome b                                                  |
| TGME49_252070 | 6.63            | 4.72   | 4.88E-25 | 4.02E-22 | KRUF family protein                                           |
| TGME49_255060 | 7.02            | 9.39   | 8.13E-25 | 6.02E-22 | cytochrome b(N-terminal)/b6/petB subfamily protein            |
| TGME49_259020 | 6.15            | 6.32   | 4.67E-24 | 3.15E-21 | bradyzoite antigen BAG1                                       |
| TGME49_237130 | 7.60            | 9.77   | 6.84E-24 | 4.22E-21 | cytochrome b, putative                                        |
| TGME49_293790 | 4.52            | 5.45   | 4.38E-23 | 2.49E-20 | hypothetical protein                                          |
| TGME49_291040 | 4.68            | 6.32   | 3.93E-21 | 2.08E-18 | lactate dehydrogenase LDH2                                    |
| TGME49_313440 | 4.65            | 7.70   | 1.15E-19 | 5.66E-17 | hypothetical protein                                          |
| TGME49_301222 | 2.73            | 6.51   | 2.67E-18 | 1.23E-15 | DNA repair protein Rad4 domain-containing protein             |
| TGME49_247340 | 4.66            | 5.11   | 8.22E-18 | 3.58E-15 | hypothetical protein                                          |
| TGME49_322000 | -3.55           | 6.91   | 2.48E-17 | 1.02E-14 | myosin-light-chain kinase                                     |
| TGME49_252065 | 3.49            | 5.35   | 3.68E-16 | 1.43E-13 | KRUF family protein                                           |
| TGME49_207210 | 4.66            | 6.03   | 6.49E-16 | 2.41E-13 | hypothetical protein                                          |
| TGME49_302055 | 8.51            | 5.01   | 1.97E-15 | 6.94E-13 | ribosomal protein RPS12                                       |
| TGME49_223660 | 2.39            | 7.24   | 5.55E-15 | 1.87E-12 | 50S ribosomal protein L4, putative                            |
| TGME49_252640 | 5.49            | 4.57   | 8.52E-15 | 2.74E-12 | P-type ATPase PMA1                                            |
| TGME49_254030 | 2.13            | 8.07   | 1.09E-13 | 3.36E-11 | zinc finger CDGSH-type domain-containing protein              |
| TGME49_294400 | -3.73           | 6.97   | 6.11E-13 | 1.81E-10 | hypothetical protein                                          |
| TGME49_260430 | 4.09            | 4.69   | 7.33E-13 | 2.09E-10 | hypothetical protein                                          |
| TGME49_209755 | 3.84            | 5.73   | 5.11E-12 | 1.40E-09 | hypothetical protein                                          |
| TGME49_242240 | -3.68           | 5.94   | 1.20E-11 | 3.06E-09 | rhoptry kinase family protein ROP19A                          |
| TGME49_245432 | 2.70            | 7.24   | 1.77E-11 | 4.36E-09 | hypothetical protein                                          |
| TGME49_275860 | 2.17            | 9.13   | 3.12E-11 | 7.46E-09 | hypothetical protein                                          |
| TGME49_235630 | 1.89            | 6.97   | 4.58E-11 | 1.06E-08 | hypothetical protein                                          |
| TGME49_286928 | -3.90           | 6.04   | 4.91E-11 | 1.10E-08 | hypothetical protein                                          |
| TGME49_236670 | 2.81            | 5.44   | 6.62E-11 | 1.44E-08 | hypothetical protein                                          |
| TGME49_315802 | -9.71           | 4.80   | 7.76E-11 | 1.64E-08 | hypothetical protein                                          |
| TGME49_221840 | 4.30            | 4.58   | 1.34E-10 | 2.76E-08 | hypothetical protein                                          |
| TGME49_270580 | 3.82            | 4.80   | 2.67E-10 | 5.34E-08 | HECT-domain (ubiquitin-transferase) domain-containing protein |
| TGME49_252390 | 1.81            | 8.34   | 3.10E-10 | 6.04E-08 | hypothetical protein                                          |
| TGME49_305460 | 1.90            | 7.39   | 4.47E-10 | 8.42E-08 | methionine aminopeptidase 2, putative                         |
| TGME49_253690 | 1.79            | 8.81   | 4.54E-10 | 8.42E-08 | hypothetical protein                                          |
| TGME49_233925 | 10.59           | 11.32  | 4.81E-10 | 8.69E-08 | hypothetical protein                                          |
| TGME49_280580 | 3.89            | 5.41   | 5.79E-10 | 1.02E-07 | SAG-related sequence SRS35B                                   |
| TGME49_258720 | 1.99            | 6.22   | 8.20E-10 | 1.41E-07 | Ubiquitin family protein, putative                            |
| TGME49_301250 | 8.01            | 14.41  | 1.05E-09 | 1.76E-07 | hypothetical protein                                          |
| TGME49_213280 | 1.97            | 9.22   | 1.14E-09 | 1.88E-07 | SAG-related sequence SRS25                                    |
| TGME49_207960 | -2.73           | 6.09   | 1.51E-09 | 2.43E-07 | hypothetical protein                                          |
| TGME49_217951 | 4.96            | 6.01   | 1.70E-09 | 2.63E-07 | hypothetical protein                                          |

|               |       |      |          |          |                                                                                         |
|---------------|-------|------|----------|----------|-----------------------------------------------------------------------------------------|
| TGME49_308093 | 1.75  | 8.24 | 2.96E-09 | 4.48E-07 | rhoptry kinase family protein (incomplete catalytic triad)                              |
| TGME49_275870 | 2.70  | 5.25 | 3.50E-09 | 5.19E-07 | tubulin/FtsZ family, GTPase domain-containing protein                                   |
| TGME49_228160 | 1.84  | 7.00 | 3.84E-09 | 5.48E-07 | acid phosphatase                                                                        |
| TGME49_242110 | -3.56 | 5.29 | 4.89E-09 | 6.84E-07 | rhoptry kinase family protein ROP38                                                     |
| TGME49_225555 | 1.58  | 8.72 | 5.93E-09 | 7.99E-07 | hypothetical protein                                                                    |
| TGME49_209985 | 2.85  | 5.16 | 6.12E-09 | 8.09E-07 | cAMP-dependent protein kinase                                                           |
| TGME49_251180 | 2.36  | 5.76 | 6.26E-09 | 8.14E-07 | KRUF family protein                                                                     |
| TGME49_273870 | -1.97 | 7.40 | 6.39E-09 | 8.17E-07 | SWI2/SNF2 ISWI-like (AT hook)                                                           |
| TGME49_299030 | 1.79  | 7.31 | 8.88E-09 | 1.10E-06 | RNA recognition motif 2 protein                                                         |
| TGME49_320180 | 4.38  | 4.76 | 9.27E-09 | 1.13E-06 | SAG-related sequence SRS16C                                                             |
| TGME49_208440 | 1.59  | 8.08 | 1.09E-08 | 1.30E-06 | hypothetical protein                                                                    |
| TGME49_320190 | 7.35  | 5.09 | 1.13E-08 | 1.32E-06 | SAG-related sequence SRS16B                                                             |
| TGME49_321360 | 1.55  | 7.60 | 1.14E-08 | 1.32E-06 | clustered-asparagine-rich protein                                                       |
| TGME49_254770 | 1.67  | 6.49 | 1.16E-08 | 1.33E-06 | Ser/Thr phosphatase family protein                                                      |
| TGME49_252220 | 1.54  | 7.62 | 1.23E-08 | 1.38E-06 | tetratricopeptide repeat domain containing protein                                      |
| TGME49_247530 | 1.67  | 8.79 | 2.88E-08 | 3.14E-06 | hypothetical protein                                                                    |
| TGME49_315885 | 6.02  | 9.43 | 3.27E-08 | 3.52E-06 | glycosyltransferase, putative                                                           |
| TGME49_299080 | 1.66  | 6.87 | 3.84E-08 | 4.07E-06 | VTC domain-containing protein                                                           |
| TGME49_252500 | 1.53  | 7.79 | 5.66E-08 | 5.91E-06 | polo kinase                                                                             |
| TGME49_319308 | -3.01 | 5.73 | 7.18E-08 | 7.39E-06 | hypothetical protein                                                                    |
| TGME49_252360 | 1.78  | 9.12 | 7.87E-08 | 7.98E-06 | rhoptry kinase family protein ROP24 (incomplete catalytic triad)                        |
| TGME49_217530 | 2.37  | 4.70 | 9.17E-08 | 9.06E-06 | hypothetical protein                                                                    |
| TGME49_202020 | 2.69  | 7.60 | 9.42E-08 | 9.18E-06 | DnAK-TPR                                                                                |
| TGME49_313100 | -2.94 | 5.89 | 1.19E-07 | 1.14E-05 | signal recognition particle SRP54 protein                                               |
| TGME49_254840 | -2.21 | 5.76 | 1.27E-07 | 1.21E-05 | tetratricopeptide repeat-containing protein                                             |
| TGME49_222040 | -3.28 | 5.45 | 1.30E-07 | 1.22E-05 | Ran-interacting Mog1 protein                                                            |
| TGME49_271935 | 2.02  | 6.37 | 1.43E-07 | 1.32E-05 | hypothetical protein                                                                    |
| TGME49_272410 | 3.71  | 8.19 | 1.56E-07 | 1.42E-05 | phosphogluconate dehydrogenase (decarboxylating), NAD binding domain-containing protein |
| TGME49_275640 | 1.67  | 6.96 | 1.57E-07 | 1.42E-05 | hypothetical protein                                                                    |
| TGME49_255635 | -5.53 | 5.32 | 1.99E-07 | 1.78E-05 | hypothetical protein                                                                    |
| TGME49_252430 | 1.46  | 7.44 | 2.60E-07 | 2.29E-05 | hypothetical protein                                                                    |
| TGME49_241880 | -1.64 | 7.93 | 2.70E-07 | 2.33E-05 | 3'-5'-cyclic nucleotide phosphodiesterase domain-containing protein                     |
| TGME49_290580 | -2.61 | 6.26 | 2.70E-07 | 2.33E-05 | ATP-binding cassette G family transporter ABCG89                                        |
| TGME49_279340 | 1.48  | 6.65 | 2.77E-07 | 2.36E-05 | hypothetical protein                                                                    |
| TGME49_200310 | 1.55  | 7.75 | 2.89E-07 | 2.43E-05 | hypothetical protein                                                                    |
| TGME49_221220 | 3.98  | 4.72 | 3.11E-07 | 2.56E-05 | hypothetical protein                                                                    |
| TGME49_308840 | 1.87  | 9.63 | 3.20E-07 | 2.61E-05 | SAG-related sequence SRS51                                                              |
| TGME49_254000 | 1.63  | 7.14 | 3.59E-07 | 2.89E-05 | hypothetical protein                                                                    |
| TGME49_229440 | -2.19 | 6.25 | 3.95E-07 | 3.15E-05 | zinc finger, C3HC4 type (RING finger) domain-containing protein                         |
| TGME49_215430 | 4.46  | 9.38 | 4.19E-07 | 3.24E-05 | hypothetical protein                                                                    |
| TGME49_268225 | -9.10 | 6.07 | 4.19E-07 | 3.24E-05 | hypothetical protein                                                                    |
| TGME49_254120 | 1.66  | 8.64 | 4.33E-07 | 3.31E-05 | autophagy-related protein 8 atg8, putative                                              |
| TGME49_203730 | -2.44 | 5.79 | 4.70E-07 | 3.55E-05 | hypothetical protein                                                                    |
| TGME49_251170 | 1.98  | 5.46 | 5.08E-07 | 3.80E-05 | KRUF family protein                                                                     |
| TGME49_218192 | -2.95 | 4.89 | 5.39E-07 | 3.99E-05 | hypothetical protein                                                                    |
| TGME49_275755 | 3.42  | 5.33 | 5.97E-07 | 4.38E-05 | hypothetical protein                                                                    |

|               |       |       |          |            |                                                                    |
|---------------|-------|-------|----------|------------|--------------------------------------------------------------------|
| TGME49_278510 | -1.62 | 8.05  | 7.53E-07 | 5.47E-05   | protein phosphatase 2C domain-containing protein                   |
| TGME49_300010 | -4.50 | 5.19  | 7.85E-07 | 5.64E-05   | hypothetical protein                                               |
| TGME49_254520 | 1.45  | 7.27  | 8.55E-07 | 6.04E-05   | mediator complex subunit MED11                                     |
| TGME49_297647 | 3.99  | 4.57  | 9.96E-07 | 6.96E-05   | hypothetical protein                                               |
| TGME49_215390 | 2.46  | 4.45  | 1.04E-06 | 7.21E-05   | TIM10 family protein, putative                                     |
| TGME49_247410 | 1.36  | 7.58  | 1.30E-06 | 8.95E-05   | hypothetical protein                                               |
| TGME49_207430 | -2.11 | 6.38  | 1.35E-06 | 9.20E-05   | ATP-dependent RNA helicase DDX1, putative                          |
| TGME49_253960 | 1.85  | 5.35  | 1.47E-06 | 9.89E-05   | oxidoreductase, short chain dehydrogenase/reductase family protein |
| TGME49_309990 | 1.54  | 6.25  | 1.54E-06 | 0.00010286 | hypothetical protein                                               |
| TGME49_262730 | 1.45  | 8.05  | 1.64E-06 | 0.00010819 | rhoptry protein ROP16                                              |
| TGME49_245428 | 2.67  | 5.35  | 1.95E-06 | 0.0001267  | hypothetical protein                                               |
| TGME49_312600 | 1.23  | 8.45  | 1.95E-06 | 0.0001267  | heat shock protein HSP21                                           |
| TGME49_253750 | 1.53  | 7.45  | 2.19E-06 | 0.00013993 | PLU-1 family protein                                               |
| TGME49_255240 | -2.42 | 5.60  | 2.18E-06 | 0.00013993 | hypothetical protein                                               |
| TGME49_244370 | 6.32  | 11.45 | 2.22E-06 | 0.0001407  | TDC1, putative                                                     |
| TGME49_242260 | -2.03 | 5.84  | 2.25E-06 | 0.00014136 | hypothetical protein                                               |
| TGME49_266100 | 1.51  | 6.81  | 2.28E-06 | 0.00014226 | rhoptry kinase family protein ROP41                                |
| TGME49_266900 | 1.65  | 8.02  | 2.37E-06 | 0.0001465  | cyclin, N-terminal domain-containing protein                       |
| TGME49_257750 | -2.35 | 7.84  | 2.41E-06 | 0.00014762 | homocysteine s-methyltransferase domain-containing protein         |
| TGME49_212250 | 1.38  | 7.45  | 2.45E-06 | 0.00014882 | XPG N-terminal domain-containing protein                           |
| TGME49_227430 | 2.88  | 5.71  | 2.63E-06 | 0.00015834 | transmembrane amino acid transporter protein                       |
| TGME49_280700 | -1.78 | 7.01  | 3.09E-06 | 0.00018327 | arginine decarboxylase                                             |
| TGME49_319350 | -1.82 | 9.13  | 3.07E-06 | 0.00018327 | SAG-related sequence SRS17B                                        |
| TGME49_225130 | -3.05 | 5.10  | 3.16E-06 | 0.00018604 | hypothetical protein                                               |
| TGME49_218200 | -2.74 | 5.22  | 3.28E-06 | 0.00019129 | UDP-sugar pyrophosphorylase                                        |
| TGME49_316270 | 1.61  | 6.15  | 3.35E-06 | 0.00019227 | Rab geranylgeranyl transferase type II beta subunit, putative      |
| TGME49_239270 | -1.67 | 7.52  | 3.44E-06 | 0.00019593 | hypothetical protein                                               |
| TGME49_244670 | 1.34  | 7.10  | 3.77E-06 | 0.00021331 | hypothetical protein                                               |
| TGME49_285190 | -1.68 | 6.63  | 4.06E-06 | 0.00022813 | zinc finger, C3HC4 type (RING finger) domain-containing protein    |
| TGME49_226310 | -2.13 | 7.53  | 4.20E-06 | 0.00023417 | zinc finger (CCCH type) motif-containing protein                   |
| TGME49_246978 | -2.90 | 5.37  | 4.27E-06 | 0.00023601 | hypothetical protein                                               |
| TGME49_308090 | 2.58  | 9.77  | 4.38E-06 | 0.00024025 | rhoptry protein ROP5                                               |
| TGME49_312270 | 1.37  | 8.08  | 4.52E-06 | 0.00024613 | rhoptry protein ROP13                                              |
| TGME49_255510 | -1.43 | 7.27  | 4.69E-06 | 0.00025363 | ankyrin repeat-containing protein                                  |
| TGME49_217220 | -1.57 | 6.81  | 5.16E-06 | 0.0002751  | zinc finger, C3HC4 type (RING finger) domain-containing protein    |
| TGME49_226380 | 1.34  | 8.18  | 5.64E-06 | 0.00029866 | hypothetical protein                                               |
| TGME49_208850 | 2.52  | 5.42  | 6.06E-06 | 0.00031474 | SAG-related sequence SRS11                                         |
| TGME49_279100 | 1.35  | 9.07  | 6.21E-06 | 0.00031519 | hypothetical protein                                               |
| TGME49_201400 | -2.01 | 5.98  | 6.21E-06 | 0.00031519 | Sin3-associated polypeptide SAP18                                  |
| TGME49_293500 | -2.99 | 5.07  | 6.18E-06 | 0.00031519 | hypothetical protein                                               |
| TGME49_268860 | 4.11  | 4.79  | 6.59E-06 | 0.00033238 | enolase 1                                                          |
| TGME49_298840 | 1.64  | 6.46  | 6.81E-06 | 0.00034108 | hypothetical protein                                               |
| TGME49_320110 | 3.01  | 8.51  | 7.85E-06 | 0.00038531 | proliferating cell nuclear antigen PCNA2                           |
| TGME49_220240 | 1.45  | 8.76  | 7.98E-06 | 0.00038886 | hypothetical protein                                               |
| TGME49_268230 | -3.86 | 5.64  | 8.12E-06 | 0.00039334 | hypothetical protein                                               |
| TGME49_240250 | -1.39 | 7.48  | 8.21E-06 | 0.00039478 | macro domain-containing protein                                    |
| TGME49_262860 | -2.20 | 5.63  | 8.26E-06 | 0.00039478 | ADP-ribosylation factor family protein 1, putative                 |
| TGME49_254050 | 1.30  | 6.49  | 8.53E-06 | 0.00040365 | optic atrophy 3 protein (opa3) protein                             |

|               |       |       |          |            |                                                                    |
|---------------|-------|-------|----------|------------|--------------------------------------------------------------------|
| TGME49_261750 | -1.64 | 6.89  | 8.91E-06 | 0.00041783 | rhoptry neck protein RON10                                         |
| TGME49_212940 | -7.44 | 6.33  | 9.02E-06 | 0.00042023 | hypothetical protein                                               |
| TGME49_293480 | 2.09  | 7.21  | 9.35E-06 | 0.00043025 | MoeA N-terminal region (domain I and II) domain-containing protein |
| TGME49_259530 | -1.69 | 6.38  | 9.33E-06 | 0.00043025 | GalNac                                                             |
| TGME49_279450 | -7.66 | 4.57  | 9.51E-06 | 0.00043496 | adenylosuccinate synthetase, putative                              |
| TGME49_231180 | -3.51 | 5.84  | 9.58E-06 | 0.00043523 | hypothetical protein                                               |
| TGME49_290600 | 6.31  | 12.08 | 9.88E-06 | 0.00044657 | succinyl-CoA-synthetase alpha SCSA                                 |
| TGME49_250100 | 1.71  | 6.54  | 1.09E-05 | 0.00049006 | hypothetical protein                                               |
| TGME49_288700 | -2.16 | 5.73  | 1.16E-05 | 0.00051614 | RecF/RecN/SMC N terminal domain-containing protein                 |
| TGME49_276920 | -1.73 | 6.74  | 1.19E-05 | 0.00052752 | protein phosphatase 2C domain-containing protein                   |
| TGME49_258590 | -2.53 | 5.43  | 1.29E-05 | 0.00056831 | hypothetical protein                                               |
| TGME49_270650 | 2.02  | 5.21  | 1.34E-05 | 0.00058835 | deoxyribose-phosphate aldolase                                     |
| TGME49_275450 | 1.16  | 7.53  | 1.41E-05 | 0.00061313 | hypothetical protein                                               |
| TGME49_219520 | -1.38 | 7.45  | 1.48E-05 | 0.00063501 | histone arginine methyltransferase PRMT1                           |
| TGME49_243298 | -2.67 | 4.90  | 1.57E-05 | 0.00066937 | ICE family protease (caspase) p20 domain-containing protein        |
| TGME49_262050 | 1.98  | 9.30  | 1.60E-05 | 0.00067189 | rhoptry kinase family protein ROP39                                |
| TGME49_269180 | -1.22 | 7.79  | 1.61E-05 | 0.00067189 | MIF4G domain-containing protein                                    |
| TGME49_247930 | -2.90 | 5.11  | 1.61E-05 | 0.00067189 | SNARE domain-containing protein                                    |
| TGME49_228320 | -4.10 | 4.54  | 1.59E-05 | 0.00067189 | hypothetical protein                                               |
| TGME49_223480 | -2.62 | 4.98  | 1.64E-05 | 0.00067846 | sushi domain (scr repeat) domain-containing protein                |
| TGME49_312380 | -2.37 | 5.23  | 1.66E-05 | 0.00068166 | tetratricopeptide repeat-containing protein                        |
| TGME49_213680 | -2.37 | 5.20  | 1.70E-05 | 0.00069717 | MmgE/PrpD family protein                                           |
| TGME49_249860 | -1.57 | 7.01  | 1.76E-05 | 0.00071444 | hypothetical protein                                               |
| TGME49_275320 | -1.50 | 7.96  | 1.79E-05 | 0.00072583 | penicillin amidase                                                 |
| TGME49_277270 | 1.95  | 9.46  | 1.87E-05 | 0.00075196 | NTPase II                                                          |
| TGME49_220940 | 1.84  | 5.59  | 2.11E-05 | 0.0008438  | ribosomal RNA methyltransferase (FtsJ ) family protein             |
| TGME49_277260 | 2.43  | 9.98  | 2.32E-05 | 0.0009244  | hypothetical protein                                               |
| TGME49_226240 | 1.60  | 5.23  | 2.33E-05 | 0.0009245  | bud site selection protein, putative                               |
| TGME49_253100 | 1.15  | 7.21  | 2.39E-05 | 0.0009431  | hypothetical protein                                               |
| TGME49_319580 | -2.59 | 5.43  | 2.45E-05 | 0.00096193 | hypothetical protein                                               |
| TGME49_224170 | 2.34  | 4.86  | 2.56E-05 | 0.00099256 | SAG-related sequence SRS60A                                        |
| TGME49_214540 | 1.33  | 6.96  | 2.58E-05 | 0.00099437 | hypothetical protein                                               |
| TGME49_310060 | 1.91  | 5.85  | 2.60E-05 | 0.00099944 | small nuclease                                                     |
| TGME49_209090 | -1.65 | 6.23  | 2.64E-05 | 0.00100892 | proteasome maturation factor ump1 protein                          |
| TGME49_253000 | 1.28  | 6.88  | 2.73E-05 | 0.00103665 | ELMO/CED-12 family protein                                         |
| TGME49_313870 | -1.40 | 6.70  | 2.74E-05 | 0.00103665 | zinc finger, C3HC4 type (RING finger) domain-containing protein    |
| TGME49_254800 | 1.68  | 5.96  | 2.77E-05 | 0.00104312 | hypothetical protein                                               |
| TGME49_253650 | 1.12  | 8.06  | 2.92E-05 | 0.00108559 | DnaJ C terminal region domain-containing protein                   |
| TGME49_207630 | -3.45 | 4.99  | 2.93E-05 | 0.00108559 | peptidyl-tRNA hydrolase domain-containing protein                  |
| TGME49_203720 | 1.19  | 7.96  | 3.05E-05 | 0.00112546 | vitamin k epoxide reductase family protein                         |
| TGME49_306895 | 1.38  | 7.00  | 3.13E-05 | 0.00114773 | hypothetical protein                                               |
| TGME49_253440 | 1.15  | 8.62  | 3.17E-05 | 0.00115682 | cell-cycle-associated protein kinase SRPK, putative                |
| TGME49_220460 | -2.59 | 4.82  | 3.31E-05 | 0.00120346 | SNF7 family protein                                                |
| TGME49_254660 | 1.25  | 6.61  | 3.33E-05 | 0.00120421 | ankyrin repeat-containing protein                                  |
| TGME49_270510 | -1.76 | 9.30  | 3.39E-05 | 0.00122099 | asparaginyl-tRNA synthetase (NOB+tRNA synthase)                    |
| TGME49_254930 | 1.20  | 7.07  | 3.46E-05 | 0.00123954 | hypothetical protein                                               |

|               |       |       |          |            |                                                                                |
|---------------|-------|-------|----------|------------|--------------------------------------------------------------------------------|
| TGME49_236990 | 2.33  | 5.52  | 3.56E-05 | 0.00126967 | beta-ketoacyl synthase, N-terminal domain-containing protein                   |
| TGME49_201260 | -1.27 | 8.89  | 3.73E-05 | 0.00131483 | sugar transporter ST3                                                          |
| TGME49_259010 | -1.66 | 6.56  | 3.77E-05 | 0.00132209 | vacuolar ATP synthase subunit d, putative                                      |
| TGME49_223020 | -1.62 | 6.52  | 3.86E-05 | 0.00134304 | coproporphyrinogen III oxidase                                                 |
| TGME49_237830 | -1.95 | 5.67  | 3.85E-05 | 0.00134304 | DNA polymerase I domain-containing protein                                     |
| TGME49_205680 | 1.48  | 7.62  | 3.90E-05 | 0.0013509  | hypothetical protein                                                           |
| TGME49_277710 | -1.61 | 6.74  | 3.99E-05 | 0.00136779 | hypothetical protein                                                           |
| TGME49_263510 | -2.31 | 5.94  | 3.98E-05 | 0.00136779 | Spc97 / Spc98 family protein                                                   |
| TGME49_315590 | -1.80 | 5.72  | 4.01E-05 | 0.00136872 | macro domain-containing protein                                                |
| TGME49_234530 | 1.33  | 7.13  | 4.12E-05 | 0.00139486 | hypothetical protein                                                           |
| TGME49_212090 | 1.15  | 6.72  | 4.14E-05 | 0.00139486 | hypothetical protein                                                           |
| TGME49_313230 | 2.45  | 9.56  | 4.32E-05 | 0.00143499 | eukaryotic initiation factor-2, alpha subunit                                  |
| TGME49_274070 | -2.85 | 5.15  | 4.35E-05 | 0.00143775 | ThiF family protein                                                            |
| TGME49_208730 | 1.05  | 8.09  | 4.50E-05 | 0.00146959 | microneme protein, putative                                                    |
| TGME49_232640 | 1.87  | 5.17  | 4.66E-05 | 0.00150626 | RNA 2'-phosphotransferase, Tpt1/KptA family protein                            |
| TGME49_200360 | 1.64  | 9.81  | 4.64E-05 | 0.00150626 | hypothetical protein                                                           |
| TGME49_323320 | -2.94 | 5.08  | 5.02E-05 | 0.00160876 | hypothetical protein                                                           |
| TGME49_213570 | 4.84  | 11.16 | 5.08E-05 | 0.00162125 | hypothetical protein                                                           |
| TGME49_244120 | -1.84 | 5.76  | 5.12E-05 | 0.00162825 | hypothetical protein                                                           |
| TGME49_311210 | -1.53 | 6.42  | 5.18E-05 | 0.00164069 | hypothetical protein                                                           |
| TGME49_213820 | 1.35  | 6.73  | 5.23E-05 | 0.0016485  | hypothetical protein                                                           |
| TGME49_252280 | 1.54  | 5.98  | 5.26E-05 | 0.00164914 | hypothetical protein                                                           |
| TGME49_253290 | 1.10  | 7.51  | 5.28E-05 | 0.00164914 | valyl-tRNA synthetase                                                          |
| TGME49_305340 | -1.17 | 8.17  | 5.55E-05 | 0.00172919 | corepressor complex CRC230                                                     |
| TGME49_312310 | -2.24 | 5.48  | 5.60E-05 | 0.00173537 | ATPase, AAA family protein                                                     |
| TGME49_320005 | -2.39 | 5.44  | 6.07E-05 | 0.0018665  | hypothetical protein                                                           |
| TGME49_208580 | -1.58 | 6.18  | 6.28E-05 | 0.00190634 | DNA ligase 1, putative                                                         |
| TGME49_318525 | -1.59 | 6.53  | 6.26E-05 | 0.00190634 | hypothetical protein                                                           |
| TGME49_215940 | -1.97 | 6.61  | 6.38E-05 | 0.00192266 | Acetyl-coenzyme A transporter, putative                                        |
| TGME49_219832 | -2.42 | 5.42  | 6.38E-05 | 0.00192266 | cyclin-dependent kinase regulatory subunit protein                             |
| TGME49_238240 | 5.25  | 11.68 | 6.46E-05 | 0.0019387  | bystin protein                                                                 |
| TGME49_230490 | -1.58 | 6.28  | 6.68E-05 | 0.00199534 | phosphatidylinositol-4-phosphate 5-kinase                                      |
| TGME49_299240 | 1.64  | 5.35  | 6.71E-05 | 0.00199771 | hypothetical protein                                                           |
| TGME49_233030 | -1.20 | 8.47  | 6.90E-05 | 0.00204475 | gliding-associated protein GAP70                                               |
| TGME49_253140 | 1.47  | 5.83  | 7.19E-05 | 0.00212168 | hypothetical protein                                                           |
| TGME49_313200 | -2.23 | 5.25  | 7.37E-05 | 0.00216801 | leucine rich repeat-containing protein                                         |
| TGME49_257180 | -1.89 | 5.94  | 7.50E-05 | 0.00219527 | RecF/RecN/SMC N terminal domain-containing protein                             |
| TGME49_248160 | -2.51 | 4.95  | 7.77E-05 | 0.00225775 | hypothetical protein                                                           |
| TGME49_321170 | 1.75  | 4.77  | 7.83E-05 | 0.00226195 | Toxoplasma gondii family C protein                                             |
| TGME49_214410 | 1.11  | 7.48  | 8.00E-05 | 0.00229749 | hypothetical protein                                                           |
| TGME49_200320 | -1.28 | 7.51  | 8.16E-05 | 0.00233334 | hypoxanthine-xanthine-guanine phosphoribosyl transferase HXGPRT                |
| TGME49_260250 | -1.90 | 6.13  | 8.19E-05 | 0.00233492 | cyclin domain protein, cyclin H family protein                                 |
| TGME49_254620 | 1.56  | 9.88  | 8.23E-05 | 0.00233767 | ribosomal protein RPL39                                                        |
| TGME49_269710 | -1.49 | 6.75  | 8.60E-05 | 0.00243087 | hypothetical protein                                                           |
| TGME49_262780 | -1.60 | 6.39  | 8.66E-05 | 0.00244032 | FHA domain-containing protein                                                  |
| TGME49_293430 | 1.13  | 8.30  | 8.79E-05 | 0.00246332 | hypothetical protein                                                           |
| TGME49_283820 | -2.83 | 4.90  | 8.81E-05 | 0.00246332 | glycine cleavage T-protein (aminomethyl transferase) domain-containing protein |
| TGME49_236270 | -2.80 | 5.33  | 8.94E-05 | 0.00249078 | hypothetical protein                                                           |



|               |       |      |            |            |                                                                                           |
|---------------|-------|------|------------|------------|-------------------------------------------------------------------------------------------|
| TGME49_301170 | -7.08 | 5.07 | 9.02E-05   | 0.00250402 | SAG-related sequence SRS19D                                                               |
| TGME49_246800 | -1.47 | 6.38 | 9.06E-05   | 0.00250536 | acylaminoacyl-peptidase, putative                                                         |
| TGME49_254080 | 1.13  | 7.77 | 9.22E-05   | 0.00254059 | metal cation transporter, ZIP family protein                                              |
| TGME49_263610 | -1.84 | 6.26 | 9.60E-05   | 0.00262369 | hypothetical protein                                                                      |
| TGME49_228360 | 1.31  | 7.28 | 9.85E-05   | 0.00268293 | peptidyl-prolyl isomerase FKBP12, putative                                                |
| TGME49_290300 | 1.15  | 7.98 | 0.00010516 | 0.00285405 | hypothetical protein                                                                      |
| TGME49_240700 | -1.63 | 6.20 | 0.00010791 | 0.00291796 | ubiquitin family protein                                                                  |
| TGME49_311440 | 1.31  | 6.20 | 0.00010845 | 0.00292181 | SAG-related sequence SRS50                                                                |
| TGME49_288400 | -1.67 | 6.11 | 0.00011037 | 0.00295201 | LETM1 family protein                                                                      |
| TGME49_297230 | -1.67 | 6.27 | 0.00011013 | 0.00295201 | Vps53 family, N-terminal protein                                                          |
| TGME49_249550 | -1.70 | 5.67 | 0.00011136 | 0.00296793 | hypothetical protein                                                                      |
| TGME49_258070 | -1.42 | 6.52 | 0.0001122  | 0.00297944 | hypothetical protein                                                                      |
| TGME49_228370 | -1.57 | 5.97 | 0.00011557 | 0.00305802 | hypothetical protein                                                                      |
| TGME49_229640 | -1.65 | 6.18 | 0.00011697 | 0.00308412 | hypothetical protein                                                                      |
| TGME49_246200 | -2.46 | 5.02 | 0.00011924 | 0.00313277 | zinc finger (CCCH type) motif-containing protein                                          |
| TGME49_214270 | 2.98  | 9.52 | 0.00012409 | 0.00320121 | translation initiation factor IF-2, putative                                              |
| TGME49_230830 | 2.06  | 5.05 | 0.00012444 | 0.00320121 | ATPase family associated with various cellular activities (AAA) domain-containing protein |
| TGME49_253180 | 2.00  | 8.08 | 0.00012363 | 0.00320121 | hypothetical protein                                                                      |
| TGME49_266990 | -1.18 | 7.64 | 0.00012372 | 0.00320121 | beta-COP                                                                                  |
| TGME49_316230 | -1.65 | 5.94 | 0.0001242  | 0.00320121 | SAC1 phosphoinositide phosphatase, putative                                               |
| TGME49_291930 | 3.85  | 9.99 | 0.0001262  | 0.00323535 | RNA recognition motif-containing protein                                                  |
| TGME49_253330 | 1.57  | 7.81 | 0.00013494 | 0.00338915 | Rhoptry kinase family protein, truncated (incomplete catalytic triad)                     |
| TGME49_278830 | -1.19 | 8.64 | 0.00013481 | 0.00338915 | glucose-6-phosphate 1-dehydrogenase                                                       |
| TGME49_233680 | -2.65 | 4.92 | 0.00013451 | 0.00338915 | nuclear movement family protein                                                           |
| TGME49_257350 | 1.05  | 8.19 | 0.00013608 | 0.00340617 | eukaryotic translation initiation factor, putative                                        |
| TGME49_268620 | -2.80 | 5.03 | 0.00013716 | 0.00342171 | blood stage antigen 41-3 precursor, putative                                              |
| TGME49_202780 | 1.04  | 7.70 | 0.00014093 | 0.00350376 | rhoptry kinase family protein ROP25                                                       |
| TGME49_296015 | 1.16  | 6.47 | 0.00014142 | 0.00350418 | hypothetical protein                                                                      |
| TGME49_306410 | -2.16 | 5.32 | 0.00014402 | 0.00355684 | hypothetical protein                                                                      |
| TGME49_258790 | -1.35 | 7.15 | 0.00014733 | 0.00362656 | zinc finger, C3HC4 type (RING finger) domain-containing protein                           |
| TGME49_304680 | -1.73 | 5.66 | 0.00014843 | 0.0036313  | ubiquitin family protein                                                                  |
| TGME49_263720 | -2.27 | 5.02 | 0.00014851 | 0.0036313  | HMG (high mobility group) box domain-containing protein                                   |
| TGME49_247680 | -2.26 | 5.02 | 0.00014949 | 0.00364344 | hypothetical protein                                                                      |
| TGME49_260210 | -2.52 | 5.25 | 0.00015119 | 0.0036606  | Dnal domain-containing protein                                                            |
| TGME49_227150 | 1.22  | 7.65 | 0.00015509 | 0.00371856 | glutaredoxin, putative                                                                    |
| TGME49_229470 | -1.37 | 6.59 | 0.00015476 | 0.00371856 | hypothetical protein                                                                      |
| TGME49_214170 | -1.82 | 5.90 | 0.00015463 | 0.00371856 | hypothetical protein                                                                      |
| TGME49_310130 | -1.58 | 6.23 | 0.00015747 | 0.00376363 | Spc97 / Spc98 family protein                                                              |
| TGME49_252260 | 1.92  | 4.57 | 0.00015824 | 0.00376985 | hypothetical protein                                                                      |
| TGME49_220910 | -1.62 | 6.95 | 0.00015963 | 0.00379064 | HEAT repeat-containing protein                                                            |
| TGME49_223150 | -2.36 | 5.54 | 0.00016026 | 0.00379359 | START domain-containing protein                                                           |
| TGME49_285710 | 1.39  | 5.78 | 0.00016365 | 0.00386136 | hypothetical protein                                                                      |
| TGME49_217360 | -2.11 | 5.84 | 0.0001689  | 0.00397272 | hypothetical protein                                                                      |
| TGME49_267070 | 1.12  | 7.77 | 0.00017227 | 0.00403898 | aquaporin 2                                                                               |
| TGME49_204270 | -1.63 | 6.40 | 0.00017545 | 0.00410063 | hypothetical protein                                                                      |
| TGME49_240430 | -2.23 | 4.90 | 0.00017918 | 0.00416166 | glyoxalase family protein                                                                 |
| TGME49_314250 | 2.07  | 4.49 | 0.0001811  | 0.00419307 | bradyzoite rhoptry protein BRP1                                                           |
| TGME49_254270 | 1.33  | 5.62 | 0.00018265 | 0.00421575 | hypothetical protein                                                                      |
| TGME49_230430 | -2.06 | 5.37 | 0.00018328 | 0.00421706 | vesicle-associated membrane protein, putative                                             |

|               |       |       |            |            |                                                                |
|---------------|-------|-------|------------|------------|----------------------------------------------------------------|
| TGME49_247360 | 1.07  | 7.30  | 0.0001861  | 0.00426873 | PAP2 superfamily protein                                       |
| TGME49_208910 | -1.53 | 6.43  | 0.0001868  | 0.00427166 | hypothetical protein                                           |
| TGME49_201710 | 1.59  | 5.63  | 0.00019086 | 0.00435097 | WD domain, G-beta repeat-containing protein                    |
| TGME49_321410 | 2.86  | 8.06  | 0.00020402 | 0.00462083 | hypothetical protein                                           |
| TGME49_263785 | -2.59 | 4.86  | 0.00020457 | 0.00462083 | phosphatidate cytidyltransferase                               |
| TGME49_214575 | 1.71  | 5.04  | 0.00021055 | 0.00474163 | hypothetical protein                                           |
| TGME49_313180 | -1.05 | 8.51  | 0.00021188 | 0.004757   | cell-cycle-associated protein kinase PRP4, putative            |
| TGME49_217350 | -2.26 | 5.20  | 0.00021405 | 0.00479115 | methyltransferase MTA70, putative                              |
| TGME49_313385 | 1.64  | 5.33  | 0.00021608 | 0.00482205 | hypothetical protein                                           |
| TGME49_230080 | -1.72 | 5.34  | 0.00021823 | 0.00484095 | DEAD/DEAH box helicase domain-containing protein               |
| TGME49_259240 | 4.06  | 11.70 | 0.00022027 | 0.00485719 | ribosomal protein RPS21                                        |
| TGME49_275990 | 1.26  | 6.60  | 0.00022018 | 0.00485719 | hypothetical protein                                           |
| TGME49_319312 | -2.01 | 5.18  | 0.00022662 | 0.00496749 | hypothetical protein                                           |
| TGME49_222920 | 1.31  | 6.27  | 0.00023378 | 0.00509433 | mbp-1 interacting protein-2a family protein                    |
| TGME49_253820 | 1.08  | 8.35  | 0.00023979 | 0.00514958 | hypothetical protein                                           |
| TGME49_207880 | -1.59 | 6.29  | 0.00023847 | 0.00514958 | hypothetical protein                                           |
| TGME49_231960 | -1.88 | 6.35  | 0.00023921 | 0.00514958 | omega secalin, putative                                        |
| TGME49_232060 | 1.73  | 5.60  | 0.00024263 | 0.00519545 | hypothetical protein                                           |
| TGME49_282190 | -1.15 | 7.00  | 0.00024573 | 0.00524339 | hydrolase, NUDIX family protein                                |
| TGME49_215930 | -6.94 | 4.44  | 0.00024628 | 0.00524339 | mediator complex subunit MED21                                 |
| TGME49_305160 | 2.59  | 4.53  | 0.00024984 | 0.00530208 | histone H2Ba                                                   |
| TGME49_283540 | 1.10  | 8.44  | 0.00025047 | 0.00530208 | hypothetical protein                                           |
| TGME49_232270 | -1.53 | 5.61  | 0.00025197 | 0.00531867 | histidine acid phosphatase superfamily protein                 |
| TGME49_233300 | -1.71 | 5.26  | 0.00025802 | 0.00543094 | RhoGAP domain-containing protein                               |
| TGME49_253470 | 1.02  | 7.33  | 0.00026302 | 0.00552036 | alveolin domain containing intermediate filament IMC13         |
| TGME49_298970 | 1.21  | 6.90  | 0.00026645 | 0.00556087 | LSM3, U6 small nuclear RNA associated isoform 2 family protein |
| TGME49_216140 | 1.19  | 7.04  | 0.00026615 | 0.00556087 | tetratricopeptide repeat-containing protein                    |
| TGME49_232960 | -1.32 | 7.01  | 0.00027333 | 0.00568857 | oxidoreductase, 2OG-Fe(II) oxygenase family protein            |
| TGME49_311905 | -2.69 | 4.73  | 0.0002766  | 0.00574043 | hypothetical protein                                           |
| TGME49_318650 | 1.08  | 8.08  | 0.00028096 | 0.00579849 | transhydrogenase                                               |
| TGME49_254365 | 1.07  | 7.70  | 0.00028074 | 0.00579849 | phosphatidate cytidyltransferase                               |
| TGME49_314070 | 1.14  | 6.15  | 0.00028688 | 0.00590407 | hypothetical protein                                           |
| TGME49_205330 | 1.01  | 7.80  | 0.00028841 | 0.00590648 | hypothetical protein                                           |
| TGME49_304670 | -1.51 | 6.35  | 0.00028938 | 0.00590648 | leucine rich repeat-containing protein                         |
| TGME49_242118 | -3.74 | 4.95  | 0.00028901 | 0.00590648 | myosin-light-chain kinase                                      |
| TGME49_254460 | 1.22  | 7.06  | 0.00029138 | 0.00593077 | hypothetical protein                                           |
| TGME49_293190 | -1.18 | 7.22  | 0.0002937  | 0.00596178 | endonuclease/exonuclease/phosphatase family protein            |
| TGME49_253170 | 1.79  | 6.90  | 0.00029676 | 0.00600733 | zinc carboxypeptidase, putative                                |
| TGME49_316250 | 1.00  | 8.64  | 0.00029892 | 0.00603455 | hypothetical protein                                           |
| TGME49_207160 | 2.16  | 5.07  | 0.00030009 | 0.00603463 | SAG-related sequence SRS49D                                    |
| TGME49_251500 | -1.23 | 7.59  | 0.00030055 | 0.00603463 | eukaryotic initiation factor-3, subunit 3, putative            |
| TGME49_213710 | -1.50 | 6.17  | 0.0003018  | 0.00603489 | WD domain, G-beta repeat-containing protein                    |
| TGME49_313970 | -2.61 | 5.18  | 0.00030301 | 0.00603489 | Phytanoyl-CoA dioxygenase (PhyH) superfamily protein           |
| TGME49_295950 | 1.36  | 5.58  | 0.00030397 | 0.0060378  | KRUF family protein                                            |
| TGME49_221320 | 1.65  | 9.10  | 0.0003076  | 0.00609352 | acetyl-CoA carboxylase ACC1                                    |
| TGME49_320050 | 7.08  | 16.23 | 0.00031077 | 0.00613997 | ribosomal protein RPL5                                         |
| TGME49_297730 | -1.86 | 5.78  | 0.00031384 | 0.00618415 | transcription elongation factor 1, putative                    |

|               |       |      |            |            |                                                                      |
|---------------|-------|------|------------|------------|----------------------------------------------------------------------|
| TGME49_205200 | 1.15  | 6.26 | 0.00032129 | 0.00631415 | hypothetical protein                                                 |
| TGME49_271930 | -0.99 | 8.48 | 0.00033394 | 0.0065282  | hypothetical protein                                                 |
| TGME49_293740 | 0.99  | 8.81 | 0.00033811 | 0.0065922  | hypothetical protein                                                 |
| TGME49_306020 | 1.32  | 5.49 | 0.00034053 | 0.0066061  | hypothetical protein                                                 |
| TGME49_289140 | 1.06  | 6.35 | 0.0003415  | 0.0066061  | ribosomal protein l22/l43, putative                                  |
| TGME49_263710 | -1.45 | 6.20 | 0.00034145 | 0.0066061  | acyl-CoA:cholesterol acyltransferase alpha ACAT1-alpha               |
| TGME49_202280 | -2.17 | 5.61 | 0.00034579 | 0.00667178 | WD domain, G-beta repeat-containing protein                          |
| TGME49_275430 | -1.69 | 5.84 | 0.00035795 | 0.00688843 | hypothetical protein                                                 |
| TGME49_202240 | -2.68 | 4.63 | 0.00036471 | 0.0069642  | RAP domain-containing protein                                        |
| TGME49_206430 | -1.19 | 6.71 | 0.00036692 | 0.00698479 | formin FRM1                                                          |
| TGME49_216020 | -1.87 | 5.94 | 0.00036767 | 0.00698479 | peptidase family c78 protein                                         |
| TGME49_297780 | -1.53 | 6.48 | 0.00036885 | 0.00698931 | ATPase/histidine kinase/DNA gyrase B/HSP90 domain-containing protein |
| TGME49_227580 | -1.25 | 7.72 | 0.00037195 | 0.0070301  | transmembrane amino acid transporter protein                         |
| TGME49_249730 | -1.78 | 5.40 | 0.00037465 | 0.00706299 | hypothetical protein                                                 |
| TGME49_263080 | 1.04  | 7.13 | 0.00037761 | 0.00709871 | hypothetical protein                                                 |
| TGME49_313480 | -2.71 | 4.81 | 0.00037846 | 0.00709871 | hypothetical protein                                                 |
| TGME49_264870 | 1.20  | 7.17 | 0.00038614 | 0.00722461 | Sodium:neurotransmitter symporter family protein                     |
| TGME49_243580 | -1.07 | 7.00 | 0.00038764 | 0.00723421 | Hit family protein involved in cell-cycle regulation, putative       |
| TGME49_240650 | -1.13 | 7.64 | 0.00039034 | 0.00724817 | coatomer protein complex, subunit alpha, putative                    |
| TGME49_295935 | 1.08  | 9.03 | 0.00039705 | 0.00735441 | KRUF family protein                                                  |
| TGME49_311920 | -1.17 | 7.15 | 0.00040272 | 0.00742228 | GRAM domain-containing protein                                       |
| TGME49_239600 | 1.75  | 5.83 | 0.00042169 | 0.00773345 | rhoptry kinase family protein ROP23 (incomplete catalytic triad)     |
| TGME49_216510 | -1.55 | 5.83 | 0.00042557 | 0.00778529 | thioredoxin, putative                                                |
| TGME49_253490 | 1.22  | 6.93 | 0.00042778 | 0.00780639 | hypothetical protein                                                 |
| TGME49_257340 | -2.29 | 4.72 | 0.00043817 | 0.00797647 | Ras family protein                                                   |
| TGME49_216920 | -1.69 | 5.80 | 0.00044017 | 0.00799311 | mediator complex subunit MED8                                        |
| TGME49_276930 | 1.04  | 8.13 | 0.00044148 | 0.00799745 | hypothetical protein                                                 |
| TGME49_270595 | 2.39  | 6.82 | 0.00044406 | 0.00802454 | UBA/TS-N domain-containing protein                                   |
| TGME49_289650 | 0.97  | 8.20 | 0.0004498  | 0.00808867 | PEP-carboxykinase I                                                  |
| TGME49_253600 | 1.45  | 6.44 | 0.00045447 | 0.00815295 | hypothetical protein                                                 |
| TGME49_312560 | -1.26 | 6.38 | 0.00047041 | 0.0083982  | hypothetical protein                                                 |
| TGME49_221580 | -1.20 | 6.88 | 0.00047959 | 0.00852098 | ribosomal RNA large subunit methyltransferase J protein              |
| TGME49_267420 | 0.95  | 8.24 | 0.00049023 | 0.00867479 | mago nashi family protein 2, putative                                |
| TGME49_270530 | -1.26 | 6.58 | 0.00049227 | 0.00867479 | ubiquitin fusion degradation protein UFD1CY                          |
| TGME49_251460 | -1.56 | 6.07 | 0.00049293 | 0.00867479 | hypothetical protein                                                 |
| TGME49_217555 | 0.89  | 7.97 | 0.00049656 | 0.00871801 | hypothetical protein                                                 |
| TGME49_277920 | 1.19  | 7.07 | 0.00050086 | 0.00877276 | hypothetical protein                                                 |
| TGME49_244380 | 2.19  | 8.24 | 0.00050211 | 0.00877391 | cactin                                                               |
| TGME49_311250 | -1.39 | 5.97 | 0.00053395 | 0.00928651 | hypothetical protein                                                 |
| TGME49_315750 | -1.33 | 7.11 | 0.00053527 | 0.00928759 | hypothetical protein                                                 |
| TGME49_214970 | -1.23 | 8.09 | 0.00054158 | 0.00937513 | DNA replication licensing factor, putative                           |
| TGME49_254150 | 1.62  | 5.06 | 0.00054947 | 0.00948962 | hypothetical protein                                                 |
| TGME49_257120 | -1.63 | 6.07 | 0.00055897 | 0.00963119 | sugar transporter ST1                                                |
| TGME49_262630 | 2.15  | 4.84 | 0.00056298 | 0.00967783 | hypothetical protein                                                 |
| TGME49_210380 | -1.15 | 6.94 | 0.00056806 | 0.00974136 | hypothetical protein                                                 |
| TGME49_214400 | 1.40  | 4.87 | 0.0005728  | 0.00977856 | hypothetical protein                                                 |
| TGME49_268220 | 5.79  | 4.65 | 0.00059543 | 0.01011826 | hypothetical protein                                                 |
| TGME49_209050 | -1.37 | 6.89 | 0.00060153 | 0.0101984  | Tyrosine kinase-like (TKL) protein                                   |

|               |       |       |            |            |                                                                                     |
|---------------|-------|-------|------------|------------|-------------------------------------------------------------------------------------|
| TGME49_221170 | -1.28 | 6.84  | 0.00060944 | 0.01026237 | CAAX metallo endopeptidase                                                          |
| TGME49_253860 | 1.04  | 6.69  | 0.00061773 | 0.01031911 | Tyrosine kinase-like (TKL) protein                                                  |
| TGME49_255650 | -1.18 | 7.47  | 0.00061854 | 0.01031911 | DHHC zinc finger domain-containing protein                                          |
| TGME49_269290 | -1.82 | 5.13  | 0.00062668 | 0.01041055 | hypothetical protein                                                                |
| TGME49_310730 | -1.22 | 6.24  | 0.00063057 | 0.01045163 | hypothetical protein                                                                |
| TGME49_268810 | -1.52 | 6.39  | 0.00064029 | 0.01056542 | ck2 beta subunit                                                                    |
| TGME49_318320 | -1.92 | 5.30  | 0.00063975 | 0.01056542 | ATP-dependent Clp endopeptidase, proteolytic subunit ClpP domain-containing protein |
| TGME49_264970 | -1.84 | 5.65  | 0.00066745 | 0.0109406  | hypothetical protein                                                                |
| TGME49_284660 | 1.34  | 5.36  | 0.00066934 | 0.01094734 | mitochondrial ribosomal protein s6-2, putative                                      |
| TGME49_254710 | 1.05  | 7.19  | 0.00067379 | 0.01099578 | serine esterase (DUF676) protein                                                    |
| TGME49_231140 | 3.09  | 11.22 | 0.00067728 | 0.01102846 | ribosomal protein RPS25                                                             |
| TGME49_245460 | 4.06  | 12.61 | 0.00068283 | 0.01108366 | ribosomal protein RPS8                                                              |
| TGME49_213050 | 1.31  | 8.33  | 0.00068366 | 0.01108366 | hypothetical protein                                                                |
| TGME49_229690 | -1.13 | 6.42  | 0.00070208 | 0.01135747 | autophagy-related protein 7 atg7, putative                                          |
| TGME49_219610 | 1.62  | 5.75  | 0.00070979 | 0.01138331 | hypothetical protein                                                                |
| TGME49_205700 | 1.58  | 10.39 | 0.00070824 | 0.01138331 | cyclophilin precursor                                                               |
| TGME49_318750 | 1.30  | 6.14  | 0.00070629 | 0.01138331 | deoxyribose-phosphate aldolase                                                      |
| TGME49_252290 | 1.16  | 6.98  | 0.00070982 | 0.01138331 | importin alpha, putative                                                            |
| TGME49_232130 | -0.98 | 8.66  | 0.00075497 | 0.01202923 | hypothetical protein                                                                |
| TGME49_297420 | -1.64 | 5.89  | 0.00075485 | 0.01202923 | beta-tubulin cofactor D, putative                                                   |
| TGME49_246330 | -1.14 | 6.92  | 0.00078269 | 0.01236448 | CRAL/TRIO domain-containing protein                                                 |
| TGME49_295472 | -1.45 | 6.42  | 0.0007853  | 0.01237927 | C2 domain-containing protein                                                        |
| TGME49_310460 | -1.11 | 6.61  | 0.00079421 | 0.0124667  | Rab6                                                                                |
| TGME49_290160 | -1.13 | 7.33  | 0.00080711 | 0.0126424  | sortilin, putative                                                                  |
| TGME49_288245 | 1.31  | 6.23  | 0.00083168 | 0.01292563 | hypothetical protein                                                                |
| TGME49_308950 | 1.08  | 8.04  | 0.000835   | 0.01292563 | histidine acid phosphatase superfamily protein                                      |
| TGME49_295990 | 1.00  | 6.85  | 0.00082928 | 0.01292563 | ubiquitin conjugating enzyme E2, putative                                           |
| TGME49_210255 | 0.99  | 6.96  | 0.00083223 | 0.01292563 | hypothetical protein                                                                |
| TGME49_310360 | -1.10 | 7.38  | 0.00083566 | 0.01292563 | hypothetical protein                                                                |
| TGME49_240710 | -1.19 | 6.28  | 0.00083307 | 0.01292563 | RNA recognition motif-containing protein                                            |
| TGME49_242030 | -1.71 | 5.29  | 0.00084056 | 0.01297445 | hypothetical protein                                                                |
| TGME49_285170 | -2.95 | 4.61  | 0.00086138 | 0.01324058 | methyltransferase small, putative                                                   |
| TGME49_314970 | -1.05 | 7.01  | 0.00087225 | 0.01337999 | root hair defective 3 gtp-binding protein (rhd3) protein                            |
| TGME49_224020 | 1.06  | 6.40  | 0.00087744 | 0.01340404 | hypothetical protein                                                                |
| TGME49_204400 | -0.97 | 8.61  | 0.00089028 | 0.01352629 | ATPase synthase subunit alpha, putative                                             |
| TGME49_321560 | -1.29 | 6.59  | 0.00089092 | 0.01352629 | zinc knuckle domain-containing protein                                              |
| TGME49_308580 | -1.64 | 5.77  | 0.0008882  | 0.01352629 | Lon protease family protein                                                         |
| TGME49_211440 | -1.34 | 6.23  | 0.00089381 | 0.0135424  | hypothetical protein                                                                |
| TGME49_243730 | 1.29  | 9.93  | 0.0009079  | 0.01369992 | rhopty protein ROP9                                                                 |
| TGME49_253310 | 1.20  | 5.37  | 0.00091216 | 0.01373615 | hypothetical protein                                                                |
| TGME49_237290 | -1.25 | 6.65  | 0.00091464 | 0.0137456  | hypothetical protein                                                                |
| TGME49_298030 | -1.96 | 4.94  | 0.000944   | 0.0141581  | Ubiquinol-cytochrome c chaperone, putative                                          |
| TGME49_216810 | 1.13  | 7.66  | 0.00095327 | 0.01426829 | 5'-nucleotidase, C-terminal domain-containing protein                               |
| TGME49_254720 | 1.44  | 9.40  | 0.00096501 | 0.01438714 | dense granule protein GRA8                                                          |
| TGME49_238040 | -1.31 | 6.05  | 0.00096704 | 0.01438714 | protein disulfide-isomerase domain-containing protein                               |
| TGME49_235740 | -1.50 | 5.82  | 0.00096556 | 0.01438714 | hypothetical protein                                                                |
| TGME49_266850 | 1.27  | 5.79  | 0.00097381 | 0.0144589  | 3-demethylubiquinone-9 3-O-methyltransferase                                        |
| TGME49_290150 | -1.42 | 6.93  | 0.00098669 | 0.01462071 | hypothetical protein                                                                |
| TGME49_314780 | -1.05 | 7.21  | 0.00100056 | 0.01476718 | myosin G                                                                            |

|               |       |       |            |            |                                                                     |
|---------------|-------|-------|------------|------------|---------------------------------------------------------------------|
| TGME49_306350 | 1.14  | 6.54  | 0.00102208 | 0.01505484 | variable surface lipoprotein                                        |
| TGME49_258090 | -1.11 | 6.96  | 0.00103856 | 0.0152673  | hypothetical protein                                                |
| TGME49_248570 | -1.74 | 5.00  | 0.00106235 | 0.01555529 | hypothetical protein                                                |
| TGME49_201880 | 0.87  | 8.04  | 0.00107156 | 0.0156529  | hypothetical protein                                                |
| TGME49_225560 | -1.11 | 8.81  | 0.00107325 | 0.0156529  | hypothetical protein                                                |
| TGME49_211860 | 1.16  | 6.12  | 0.00109557 | 0.01591585 | hypothetical protein                                                |
| TGME49_240450 | 1.47  | 5.06  | 0.00112395 | 0.01623578 | Maf family protein                                                  |
| TGME49_294790 | 0.93  | 8.88  | 0.00112502 | 0.01623578 | hypothetical protein                                                |
| TGME49_294730 | -1.37 | 6.07  | 0.00113817 | 0.01633648 | hypothetical protein                                                |
| TGME49_242870 | -1.50 | 5.64  | 0.00113996 | 0.01633648 | histone lysine methyltransferase, SET, putative                     |
| TGME49_298980 | 1.08  | 6.84  | 0.00115131 | 0.01643551 | RNA pseudouridine synthase superfamily protein                      |
| TGME49_224220 | -1.35 | 6.62  | 0.00115842 | 0.01650532 | serine/threonine-protein phosphatase PP2A catalytic subunit         |
| TGME49_297320 | -1.30 | 5.89  | 0.0011648  | 0.01656427 | hypothetical protein                                                |
| TGME49_310300 | -1.53 | 5.25  | 0.00120233 | 0.01705872 | hypothetical protein                                                |
| TGME49_225440 | -3.61 | 4.61  | 0.00120417 | 0.01705872 | hypothetical protein                                                |
| TGME49_318690 | 1.49  | 4.49  | 0.00120743 | 0.01707098 | RNA recognition motif-containing protein                            |
| TGME49_274160 | -1.05 | 6.52  | 0.00120965 | 0.01707098 | hypothetical protein                                                |
| TGME49_316660 | -1.20 | 6.57  | 0.00124589 | 0.0175157  | cullin family protein                                               |
| TGME49_220400 | 1.45  | 10.26 | 0.00125938 | 0.01764355 | actin depolymerizing factor ADF                                     |
| TGME49_290040 | 0.97  | 7.91  | 0.00126616 | 0.01769992 | macrophage migration inhibitory factor, putative                    |
| TGME49_316430 | -1.77 | 6.04  | 0.00130408 | 0.01816149 | target of rapamycin (TOR), putative                                 |
| TGME49_311625 | -1.49 | 5.89  | 0.00131879 | 0.01833197 | WD domain, G-beta repeat-containing protein                         |
| TGME49_240950 | -2.61 | 5.11  | 0.00132731 | 0.01838143 | hypothetical protein                                                |
| TGME49_223950 | 0.97  | 6.29  | 0.00134077 | 0.01853201 | hypothetical protein                                                |
| TGME49_321540 | -1.18 | 7.23  | 0.00134319 | 0.01853201 | hypothetical protein                                                |
| TGME49_307570 | -1.35 | 6.39  | 0.00134959 | 0.01858571 | glycerol-3-phosphate dehydrogenase (gpdh), putative                 |
| TGME49_295400 | -1.87 | 5.29  | 0.00136174 | 0.01871825 | hypothetical protein                                                |
| TGME49_252310 | 1.02  | 6.62  | 0.00137291 | 0.01883681 | hypothetical protein                                                |
| TGME49_225250 | 1.03  | 5.81  | 0.00137573 | 0.01883815 | LSU ribosomal protein L14P, putative                                |
| TGME49_280560 | -1.12 | 6.83  | 0.00138008 | 0.01883815 | selenide, water dikinase                                            |
| TGME49_215250 | -2.07 | 5.14  | 0.00140106 | 0.01904667 | thiamin pyrophosphokinase, catalytic domain-containing protein      |
| TGME49_329800 | -1.24 | 6.42  | 0.00140429 | 0.01905571 | hypothetical protein                                                |
| TGME49_218530 | -1.09 | 6.53  | 0.00141492 | 0.01916474 | proteasome-interacting thioredoxin domain-containing protein        |
| TGME49_255215 | 1.78  | 5.63  | 0.00145107 | 0.01952607 | hypothetical protein                                                |
| TGME49_203600 | -1.16 | 9.05  | 0.00145213 | 0.01952607 | hypothetical protein                                                |
| TGME49_258410 | 1.02  | 9.04  | 0.00147514 | 0.01979951 | photosensitized INA-labeled protein PHIL1                           |
| TGME49_297492 | -3.43 | 4.52  | 0.00149451 | 0.01998702 | hypothetical protein                                                |
| TGME49_270010 | -1.50 | 5.45  | 0.00149954 | 0.02001819 | hypothetical protein                                                |
| TGME49_254070 | 0.93  | 7.76  | 0.0015086  | 0.02009092 | hypothetical protein                                                |
| TGME49_234640 | -1.24 | 6.39  | 0.00151312 | 0.02009092 | hypothetical protein                                                |
| TGME49_258740 | -1.35 | 6.23  | 0.00151045 | 0.02009092 | eukaryotic initiation factor-2A, putative                           |
| TGME49_253900 | 1.38  | 5.99  | 0.00151839 | 0.02012475 | parasite porphobilinogen synthase PBGS                              |
| TGME49_226755 | 1.13  | 6.33  | 0.0015725  | 0.02080468 | 3'-5'-cyclic nucleotide phosphodiesterase domain-containing protein |
| TGME49_231870 | -1.86 | 5.00  | 0.00158699 | 0.02095908 | tetratricopeptide repeat-containing protein                         |
| TGME49_264760 | -1.12 | 6.27  | 0.00159164 | 0.02098306 | Oxysterol-binding protein                                           |
| TGME49_315300 | -1.20 | 6.20  | 0.00160345 | 0.02108525 | transcription factor IIB, putative                                  |
| TGME49_244040 | -1.68 | 5.58  | 0.00160509 | 0.02108525 | HEAT repeat-containing protein                                      |
| TGME49_217010 | -1.33 | 6.08  | 0.00162105 | 0.0212573  | hypothetical protein                                                |

|               |       |       |            |            |                                                                 |
|---------------|-------|-------|------------|------------|-----------------------------------------------------------------|
| TGME49_297880 | -1.54 | 10.22 | 0.00163174 | 0.02135967 | dense granule protein DG32                                      |
| TGME49_262070 | -0.99 | 7.01  | 0.00163574 | 0.0213742  | ribosomal rna assembly protein mis3, putative                   |
| TGME49_271760 | -1.67 | 5.44  | 0.00167307 | 0.02182356 | seryl-tRNA synthetase (SerRS2)                                  |
| TGME49_260310 | 1.52  | 4.60  | 0.00168182 | 0.02184941 | ATP-binding cassette transporter ABC.B1                         |
| TGME49_286440 | 0.97  | 6.38  | 0.00167841 | 0.02184941 | malic enzyme                                                    |
| TGME49_224540 | -1.52 | 5.44  | 0.0016839  | 0.02184941 | hypothetical protein                                            |
| TGME49_216770 | 2.12  | 6.83  | 0.00170286 | 0.02201831 | hypothetical protein                                            |
| TGME49_243410 | -1.36 | 6.18  | 0.00171962 | 0.02219625 | tetratricopeptide repeat-containing protein                     |
| TGME49_315130 | 0.93  | 6.70  | 0.00174785 | 0.02249924 | L-isoaspartyl protein carboxyl methyltransferase family protein |
| TGME49_313590 | -1.54 | 5.92  | 0.00178161 | 0.02287684 | hypothetical protein                                            |
| TGME49_253730 | 1.16  | 6.80  | 0.00178625 | 0.02288993 | importin-beta N-terminal domain-containing protein              |
| TGME49_297720 | -1.14 | 7.42  | 0.00178881 | 0.02288993 | trehalose-phosphatase                                           |
| TGME49_306730 | -2.45 | 5.07  | 0.00180396 | 0.02304404 | hypothetical protein                                            |
| TGME49_316260 | 0.98  | 8.32  | 0.00182694 | 0.02329744 | hypothetical protein                                            |
| TGME49_235515 | 1.91  | 4.58  | 0.00183264 | 0.0233186  | MORN repeat-containing protein                                  |
| TGME49_306440 | -1.34 | 5.97  | 0.0018349  | 0.0233186  | hypothetical protein                                            |
| TGME49_248130 | -2.01 | 5.04  | 0.00186308 | 0.02359582 | hypothetical protein                                            |
| TGME49_240910 | -1.21 | 6.41  | 0.00186806 | 0.02361847 | hypothetical protein                                            |
| TGME49_306280 | 0.99  | 6.62  | 0.00190188 | 0.02400522 | mediator complex subunit MED7                                   |
| TGME49_259860 | -1.24 | 5.70  | 0.00191143 | 0.02408468 | hypothetical protein                                            |
| TGME49_224810 | -1.98 | 4.85  | 0.00192209 | 0.02417439 | hypothetical protein                                            |
| TGME49_209020 | -2.11 | 4.48  | 0.00192508 | 0.02417439 | hypothetical protein                                            |
| TGME49_275460 | 1.38  | 6.68  | 0.00195144 | 0.02427203 | hypothetical protein                                            |
| TGME49_278770 | -1.20 | 7.00  | 0.0019513  | 0.02427203 | hypothetical protein                                            |
| TGME49_251620 | -1.24 | 6.29  | 0.00195086 | 0.02427203 | flap structure-specific endonuclease 1, putative                |
| TGME49_209970 | -1.33 | 6.05  | 0.00194648 | 0.02427203 | Spc97 / Spc98 family protein                                    |
| TGME49_262710 | 0.96  | 8.75  | 0.0019608  | 0.02429365 | Ctr copper transporter family protein                           |
| TGME49_218830 | -1.83 | 5.10  | 0.00195896 | 0.02429365 | hypothetical protein                                            |
| TGME49_234180 | 1.00  | 7.18  | 0.00201506 | 0.02467699 | hypothetical protein                                            |
| TGME49_216730 | -0.88 | 7.83  | 0.00200971 | 0.02467699 | MCM2/3/5 family protein                                         |
| TGME49_291940 | -1.03 | 6.46  | 0.00200642 | 0.02467699 | hypothetical protein                                            |
| TGME49_267680 | -1.21 | 6.31  | 0.0020017  | 0.02467699 | microneme protein MIC12                                         |
| TGME49_255960 | -1.38 | 6.00  | 0.00201361 | 0.02467699 | hypothetical protein                                            |
| TGME49_222120 | -1.66 | 5.28  | 0.00199738 | 0.02467699 | hypothetical protein                                            |
| TGME49_263660 | -2.37 | 4.59  | 0.00201448 | 0.02467699 | hypothetical protein                                            |
| TGME49_220530 | -1.67 | 5.46  | 0.00203992 | 0.02489908 | AP2 domain transcription factor AP2V-1                          |
| TGME49_271430 | -1.77 | 5.19  | 0.00204409 | 0.02490897 | hypothetical protein                                            |
| TGME49_248750 | -1.52 | 5.03  | 0.00208653 | 0.02536982 | hypothetical protein                                            |
| TGME49_319540 | -1.62 | 5.83  | 0.00210067 | 0.02547273 | hypothetical protein                                            |
| TGME49_229790 | -1.43 | 5.59  | 0.00210596 | 0.02549522 | hypothetical protein                                            |
| TGME49_240440 | 1.01  | 5.78  | 0.002127   | 0.02570794 | hypothetical protein                                            |
| TGME49_267590 | -1.36 | 5.96  | 0.00215429 | 0.02599528 | hypothetical protein                                            |
| TGME49_252190 | 1.41  | 5.74  | 0.00216231 | 0.02600739 | KRUF family protein                                             |
| TGME49_283550 | 0.97  | 6.70  | 0.00216115 | 0.02600739 | hypothetical protein                                            |
| TGME49_208590 | -1.08 | 7.09  | 0.00217409 | 0.02608973 | vacuolar ATP synthase subunit 54kD, putative                    |
| TGME49_288040 | -1.09 | 6.46  | 0.0021762  | 0.02608973 | hypothetical protein                                            |
| TGME49_293820 | -1.01 | 7.28  | 0.00218433 | 0.02612197 | calpain family cysteine protease domain-containing protein      |
| TGME49_228300 | -1.69 | 5.32  | 0.00218594 | 0.02612197 | CCDC25 protein                                                  |
| TGME49_237110 | -1.16 | 6.44  | 0.00220922 | 0.02635771 | replication factor C subunit 2, putative                        |
| TGME49_228980 | -1.68 | 4.98  | 0.0022169  | 0.02640676 | hypothetical protein                                            |

|               |       |       |            |            |                                                                      |
|---------------|-------|-------|------------|------------|----------------------------------------------------------------------|
| TGME49_237230 | 1.16  | 9.68  | 0.00222637 | 0.02647699 | hypothetical protein                                                 |
| TGME49_225930 | 0.78  | 8.16  | 0.00223061 | 0.02648492 | triose-phosphate isomerase TPI-I                                     |
| TGME49_239010 | 1.54  | 6.91  | 0.0022347  | 0.02649108 | hypothetical protein                                                 |
| TGME49_247690 | -1.05 | 7.31  | 0.00224321 | 0.0265494  | phospholipid-translocating P-type ATPase, flippase subfamily protein |
| TGME49_309070 | -1.67 | 5.42  | 0.00224943 | 0.02658059 | hypothetical protein                                                 |
| TGME49_214810 | 1.24  | 5.74  | 0.00226596 | 0.02673327 | hypothetical protein                                                 |
| TGME49_275650 | 1.27  | 7.60  | 0.00228085 | 0.02678282 | hypothetical protein                                                 |
| TGME49_235920 | -1.14 | 6.30  | 0.00227959 | 0.02678282 | dynein, axonemal, heavy chain 2 family protein                       |
| TGME49_229650 | -1.29 | 6.31  | 0.00228462 | 0.02678282 | josephin protein                                                     |
| TGME49_215400 | -1.74 | 5.40  | 0.00228185 | 0.02678282 | RNA recognition motif-containing protein                             |
| TGME49_253880 | 0.81  | 7.79  | 0.00228968 | 0.02679972 | GNS1/SUR4 family protein                                             |
| TGME49_221330 | -1.17 | 6.74  | 0.00230189 | 0.02690021 | DNA gyrase/topoisomerase IV, A subunit domain-containing protein     |
| TGME49_207065 | 1.08  | 5.52  | 0.00234689 | 0.02733981 | hypothetical protein                                                 |
| TGME49_223690 | 1.13  | 5.90  | 0.00235945 | 0.02739997 | hypothetical protein                                                 |
| TGME49_222400 | -0.85 | 7.23  | 0.00235804 | 0.02739997 | hypothetical protein                                                 |
| TGME49_222380 | -0.86 | 7.82  | 0.00237312 | 0.02747252 | importin-beta N-terminal domain-containing protein                   |
| TGME49_252250 | 1.30  | 5.19  | 0.002391   | 0.02763637 | ATPase, AAA family protein                                           |
| TGME49_247760 | -1.29 | 6.62  | 0.00239737 | 0.02766684 | AMP-binding enzyme domain-containing protein                         |
| TGME49_203170 | -1.11 | 7.15  | 0.00245339 | 0.02822542 | OB-fold nucleic acid binding domain-containing protein               |
| TGME49_200450 | -1.73 | 4.90  | 0.00246852 | 0.02835542 | hypothetical protein                                                 |
| TGME49_208830 | 1.16  | 8.09  | 0.00247261 | 0.02835843 | hypothetical protein                                                 |
| TGME49_229250 | 1.42  | 9.83  | 0.00247961 | 0.02839475 | ribosomal protein RPL28                                              |
| TGME49_259115 | -1.48 | 7.48  | 0.00253517 | 0.02898622 | ABC1 family protein                                                  |
| TGME49_283860 | -1.72 | 5.12  | 0.00253936 | 0.02898941 | leucine rich repeat-containing protein                               |
| TGME49_220950 | 1.44  | 9.51  | 0.00254747 | 0.02903724 | hypothetical protein                                                 |
| TGME49_318430 | -0.91 | 9.00  | 0.00256332 | 0.02917301 | malate dehydrogenase MDH                                             |
| TGME49_210430 | -0.93 | 7.63  | 0.00256966 | 0.02920031 | DnaI domain-containing protein                                       |
| TGME49_238140 | -1.15 | 6.40  | 0.00259458 | 0.02943833 | hypothetical protein                                                 |
| TGME49_214750 | -0.97 | 6.75  | 0.00261043 | 0.02957291 | hypothetical protein                                                 |
| TGME49_271300 | 1.38  | 5.25  | 0.00261811 | 0.02961461 | DNA-directed RNA polymerase II RPB7                                  |
| TGME49_202430 | -1.38 | 5.89  | 0.00262765 | 0.02967718 | hypothetical protein                                                 |
| TGME49_274150 | -1.72 | 5.23  | 0.00263899 | 0.02975988 | hypothetical protein                                                 |
| TGME49_253740 | -1.22 | 5.77  | 0.00265046 | 0.02976296 | hypothetical protein                                                 |
| TGME49_278060 | -1.76 | 5.81  | 0.00264946 | 0.02976296 | Mre11 DNA-binding domain-containing protein                          |
| TGME49_223490 | 1.15  | 5.93  | 0.00266602 | 0.0298377  | hypothetical protein                                                 |
| TGME49_283710 | -1.20 | 6.77  | 0.00266498 | 0.0298377  | Longevity-assurance protein (LAG1) domain-containing protein         |
| TGME49_271960 | 0.83  | 7.96  | 0.00267028 | 0.02984032 | hypothetical protein                                                 |
| TGME49_288360 | -1.24 | 9.40  | 0.00267705 | 0.02987085 | tryptophanyl-tRNA synthetase (TrpRS2)                                |
| TGME49_252630 | 0.91  | 8.01  | 0.00269007 | 0.02989191 | hypothetical protein                                                 |
| TGME49_232450 | -1.21 | 5.88  | 0.00269507 | 0.02989191 | SWI2/SNF2-containing protein RAD54                                   |
| TGME49_313600 | -1.30 | 6.04  | 0.00269455 | 0.02989191 | DDHD domain-containing protein                                       |
| TGME49_216760 | -1.52 | 5.08  | 0.0026884  | 0.02989191 | RNA pseudouridine synthase superfamily protein                       |
| TGME49_262690 | 3.11  | 12.26 | 0.00270269 | 0.02993045 | ribosomal protein RPL27                                              |
| TGME49_273950 | -1.68 | 5.27  | 0.00270698 | 0.02993045 | replication factor C subunit 5, putative                             |
| TGME49_293380 | -1.76 | 5.59  | 0.00271067 | 0.02993045 | histone lysine acetyltransferase HAT1                                |
| TGME49_254470 | 0.95  | 9.17  | 0.00274606 | 0.03023113 | hypothetical protein                                                 |
| TGME49_306470 | -1.10 | 6.37  | 0.00275085 | 0.03023892 | isoprenylcysteine carboxyl methyltransferase (icmt) family protein   |

|               |       |       |            |            |                                                              |
|---------------|-------|-------|------------|------------|--------------------------------------------------------------|
| TGME49_239560 | -1.46 | 4.92  | 0.0027634  | 0.03033185 | myosin E                                                     |
| TGME49_286140 | -1.40 | 5.87  | 0.00278686 | 0.03050933 | hypothetical protein                                         |
| TGME49_259190 | -1.93 | 4.76  | 0.0027878  | 0.03050933 | hypothetical protein                                         |
| TGME49_212130 | -1.20 | 6.44  | 0.00279207 | 0.03051101 | phospholipase, patatin family protein                        |
| TGME49_217600 | -0.98 | 7.07  | 0.00280103 | 0.03056387 | calcium-dependent protein kinase CDPK9                       |
| TGME49_225680 | -1.74 | 5.41  | 0.00280824 | 0.03059743 | hypothetical protein                                         |
| TGME49_262700 | -1.59 | 5.53  | 0.00283059 | 0.03079563 | tetratricopeptide repeat-containing protein                  |
| TGME49_217670 | -1.35 | 5.22  | 0.00285644 | 0.03103136 | ribosomal protein RPS6                                       |
| TGME49_250880 | -0.81 | 7.84  | 0.00286191 | 0.03104525 | kinase, pfkB family protein                                  |
| TGME49_305900 | 1.13  | 5.80  | 0.00289532 | 0.03136177 | hypothetical protein                                         |
| TGME49_249810 | -1.84 | 4.81  | 0.00291714 | 0.03155195 | activating signal cointegrator 1 complex subunit 3, putative |
| TGME49_250955 | 1.59  | 5.63  | 0.00294645 | 0.03173004 | KRUF family protein                                          |
| TGME49_213030 | 0.78  | 7.92  | 0.00294252 | 0.03173004 | hypothetical protein                                         |
| TGME49_290940 | -0.95 | 6.90  | 0.00297498 | 0.03194443 | EMP/nonaspanin domain family protein                         |
| TGME49_231120 | 1.05  | 5.98  | 0.00304048 | 0.0325534  | ribosomal protein S11, putative                              |
| TGME49_240890 | -0.94 | 6.90  | 0.0031242  | 0.03330533 | 6-phosphofructokinase                                        |
| TGME49_285830 | -1.21 | 5.93  | 0.00313617 | 0.03338312 | hypothetical protein                                         |
| TGME49_251640 | -1.29 | 5.81  | 0.00314051 | 0.03338312 | ubiquitin-conjugating enzyme subfamily protein               |
| TGME49_241140 | -1.55 | 5.27  | 0.00314558 | 0.03338917 | DEAD/DEAH box helicase domain-containing protein             |
| TGME49_253360 | 0.86  | 7.20  | 0.00315205 | 0.03340025 | hypothetical protein                                         |
| TGME49_235490 | -0.97 | 6.76  | 0.00315565 | 0.03340025 | hypothetical protein                                         |
| TGME49_300060 | 1.01  | 6.85  | 0.00320896 | 0.03380203 | signal peptidase subunit protein                             |
| TGME49_236890 | 0.88  | 7.34  | 0.00321185 | 0.03380203 | hypothetical protein                                         |
| TGME49_314660 | -1.09 | 6.93  | 0.00320399 | 0.03380203 | TPRX1 protein                                                |
| TGME49_323110 | 1.47  | 5.68  | 0.00323952 | 0.03399665 | hypothetical protein                                         |
| TGME49_297220 | -1.93 | 4.43  | 0.00325665 | 0.0340868  | AMP-binding enzyme domain-containing protein                 |
| TGME49_247370 | -1.54 | 5.12  | 0.00327287 | 0.03420125 | hypothetical protein                                         |
| TGME49_207230 | 0.90  | 6.18  | 0.00329626 | 0.03432208 | hypothetical protein                                         |
| TGME49_289310 | -1.11 | 6.48  | 0.003295   | 0.03432208 | cullin family protein                                        |
| TGME49_255290 | -2.61 | 4.89  | 0.00329833 | 0.03432208 | hypothetical protein                                         |
| TGME49_261720 | -0.99 | 7.53  | 0.00331755 | 0.03437722 | metal cation transporter, ZIP family protein                 |
| TGME49_207400 | 0.91  | 8.64  | 0.00332596 | 0.03441622 | hypothetical protein                                         |
| TGME49_315620 | -1.02 | 6.98  | 0.00336347 | 0.03470158 | vacuolar ATP synthase subunit C, putative                    |
| TGME49_314460 | -1.55 | 4.82  | 0.00336758 | 0.03470158 | hypothetical protein                                         |
| TGME49_217400 | -1.32 | 6.47  | 0.00337393 | 0.0347187  | hypothetical protein                                         |
| TGME49_216630 | -1.53 | 5.26  | 0.00338134 | 0.03474664 | trigger factor protein, putative                             |
| TGME49_297150 | -1.26 | 6.89  | 0.00339792 | 0.03478956 | MORN repeat-containing protein                               |
| TGME49_266070 | 1.31  | 10.10 | 0.00348183 | 0.03548403 | ribosomal protein RPL31                                      |
| TGME49_281480 | 1.05  | 6.08  | 0.00347312 | 0.03548403 | WD domain, G-beta repeat-containing protein                  |
| TGME49_215370 | 1.03  | 5.74  | 0.00347762 | 0.03548403 | hypothetical protein                                         |
| TGME49_253380 | 0.81  | 8.39  | 0.00349771 | 0.03554415 | AP2 domain transcription factor AP2III-2                     |
| TGME49_265790 | 0.83  | 8.49  | 0.00350049 | 0.03554415 | hypothetical protein                                         |
| TGME49_214980 | 0.77  | 7.97  | 0.00350212 | 0.03554415 | hypothetical protein                                         |
| TGME49_293780 | 1.38  | 7.20  | 0.00351938 | 0.0356704  | hypothetical protein                                         |
| TGME49_258980 | -1.61 | 5.28  | 0.00352847 | 0.03571369 | hypothetical protein                                         |
| TGME49_309752 | 0.75  | 7.99  | 0.00354434 | 0.03577345 | succinate-Coenzyme A ligase, beta subunit, putative          |
| TGME49_267750 | -1.06 | 6.69  | 0.00354886 | 0.03577345 | hypothetical protein                                         |
| TGME49_248950 | -1.47 | 5.20  | 0.00354502 | 0.03577345 | carrier superfamily protein                                  |
| TGME49_223040 | 0.97  | 7.92  | 0.0035851  | 0.03600901 | hypothetical protein                                         |
| TGME49_233500 | 0.89  | 7.35  | 0.00359167 | 0.03600901 | triose-phosphate isomerase TPI-II                            |
| TGME49_221410 | -1.09 | 6.55  | 0.00358995 | 0.03600901 | actin-like protein ALP4                                      |



|               |       |       |            |            |                                                     |
|---------------|-------|-------|------------|------------|-----------------------------------------------------|
| TGME49_255340 | -1.29 | 5.95  | 0.00358429 | 0.03600901 | tetratricopeptide repeat-containing protein         |
| TGME49_209610 | 1.07  | 6.29  | 0.00360856 | 0.03608071 | oocyst wall protein OWP2                            |
| TGME49_310560 | -1.83 | 4.51  | 0.00360533 | 0.03608071 | hypothetical protein                                |
| TGME49_274010 | -1.62 | 5.91  | 0.00363788 | 0.03622723 | hypothetical protein                                |
| TGME49_301216 | -2.21 | 4.54  | 0.00363216 | 0.03622723 | endonuclease/exonuclease/phosphatase family protein |
| TGME49_221630 | -1.23 | 5.96  | 0.00366511 | 0.03644936 | hypothetical protein                                |
| TGME49_300130 | 1.58  | 4.55  | 0.00370174 | 0.03656821 | apical membrane antigen 1 domain-containing protein |
| TGME49_243690 | 0.80  | 8.47  | 0.00370032 | 0.03656821 | hypothetical protein                                |
| TGME49_270690 | -1.09 | 6.29  | 0.00370157 | 0.03656821 | arginyl-tRNA synthetase                             |
| TGME49_221230 | -1.10 | 6.64  | 0.0036863  | 0.03656821 | hypothetical protein                                |
| TGME49_320610 | -1.49 | 5.23  | 0.0036962  | 0.03656821 | hypothetical protein                                |
| TGME49_268000 | -1.45 | 4.96  | 0.0037554  | 0.03699963 | hypothetical protein                                |
| TGME49_319590 | 1.20  | 5.31  | 0.00377928 | 0.03708934 | hypothetical protein                                |
| TGME49_237015 | 0.96  | 7.25  | 0.00378203 | 0.03708934 | hypothetical protein                                |
| TGME49_253990 | 0.91  | 6.61  | 0.00378452 | 0.03708934 | hypothetical protein                                |
| TGME49_267350 | 0.91  | 7.87  | 0.0037823  | 0.03708934 | LSM domain-containing protein                       |
| TGME49_220140 | 1.47  | 5.24  | 0.0038786  | 0.0378112  | EF hand domain-containing protein                   |
| TGME49_215895 | 0.98  | 6.10  | 0.00393147 | 0.03827633 | AP2 domain-containing protein                       |
| TGME49_262980 | -1.55 | 5.57  | 0.0039972  | 0.03886516 | hypothetical protein                                |
| TGME49_225080 | 1.56  | 10.82 | 0.00402099 | 0.03899412 | ribosomal protein RPS18                             |
| TGME49_264240 | -6.12 | 5.73  | 0.00403307 | 0.03906017 | hypothetical protein                                |
| TGME49_270930 | -0.99 | 6.53  | 0.00405721 | 0.03924269 | hypothetical protein                                |
| TGME49_235905 | -1.99 | 4.68  | 0.00407918 | 0.03940371 | ribonuclease z, putative                            |
| TGME49_249300 | -0.75 | 8.21  | 0.00409636 | 0.03951817 | hypothetical protein                                |
| TGME49_277510 | -1.09 | 6.50  | 0.00411673 | 0.0395601  | cytoplasmic dynein intermediate chain               |
| TGME49_314540 | -1.32 | 5.49  | 0.00411413 | 0.0395601  | hypothetical protein                                |
| TGME49_250670 | 1.06  | 5.81  | 0.00414224 | 0.03970224 | hypothetical protein                                |
| TGME49_321630 | -1.02 | 6.33  | 0.00413875 | 0.03970224 | RNA recognition motif-containing protein            |
| TGME49_272400 | -1.58 | 5.54  | 0.00415335 | 0.03975731 | casein kinase ii regulatory subunit protein         |
| TGME49_225050 | 0.85  | 7.65  | 0.00417614 | 0.03992387 | adenosylhomocysteinase, putative                    |
| TGME49_313410 | -0.90 | 7.05  | 0.00419219 | 0.04002568 | proteasome 26S regulatory subunit                   |
| TGME49_235020 | -0.85 | 7.55  | 0.00420065 | 0.04004776 | COPI protein, putative                              |
| TGME49_313350 | -1.19 | 5.79  | 0.00420531 | 0.04004776 | hypothetical protein                                |
| TGME49_216880 | 2.88  | 12.29 | 0.00423968 | 0.04011723 | guanine nucleotide-binding protein                  |
| TGME49_299780 | 0.89  | 8.50  | 0.00423535 | 0.04011723 | hypothetical protein                                |
| TGME49_202300 | -1.23 | 5.80  | 0.00423217 | 0.04011723 | inosine triphosphate pyrophosphatase, putative      |
| TGME49_249240 | 1.10  | 9.83  | 0.00427828 | 0.04043088 | calmodulin, putative                                |
| TGME49_306460 | -1.21 | 5.74  | 0.00433229 | 0.04088908 | bromodomain-containing protein                      |
| TGME49_225160 | 0.88  | 7.50  | 0.00436589 | 0.0411538  | hypothetical protein                                |
| TGME49_311140 | -1.58 | 4.90  | 0.00438284 | 0.0412611  | hypothetical protein                                |
| TGME49_237010 | -0.94 | 6.66  | 0.00438876 | 0.04126437 | hypothetical protein                                |
| TGME49_221470 | -0.79 | 8.34  | 0.0044     | 0.04131759 | hypothetical protein                                |
| TGME49_307605 | 1.08  | 7.13  | 0.00440566 | 0.04131838 | hypothetical protein                                |
| TGME49_233870 | 0.98  | 6.13  | 0.00441248 | 0.04133    | hypothetical protein                                |
| TGME49_254606 | 1.31  | 5.91  | 0.00442462 | 0.04139146 | hypothetical protein                                |
| TGME49_307830 | -0.80 | 8.19  | 0.00443043 | 0.04139351 | hypothetical protein                                |
| TGME49_299250 | 1.06  | 5.36  | 0.0044593  | 0.04155841 | hypothetical protein                                |
| TGME49_286510 | 1.10  | 5.67  | 0.00449005 | 0.04174003 | hypothetical protein                                |
| TGME49_217420 | -1.59 | 5.56  | 0.00448522 | 0.04174003 | hypothetical protein                                |
| TGME49_235140 | -0.86 | 7.38  | 0.004526   | 0.04196891 | hypothetical protein                                |
| TGME49_230705 | 1.07  | 6.59  | 0.0045905  | 0.04246069 | hypothetical protein                                |

|               |       |       |            |            |                                                                    |
|---------------|-------|-------|------------|------------|--------------------------------------------------------------------|
| TGME49_212310 | 0.97  | 9.06  | 0.00466016 | 0.04305123 | vacuolar ATP synthetase                                            |
| TGME49_267450 | -1.26 | 6.10  | 0.00468534 | 0.04316842 | alpha-tubulin suppressor protein                                   |
| TGME49_297510 | -1.52 | 5.94  | 0.00468683 | 0.04316842 | hypothetical protein                                               |
| TGME49_245710 | -0.95 | 7.02  | 0.00470822 | 0.04327944 | phosphatidylinositol-4-phosphate 5-kinase, putative                |
| TGME49_306330 | -1.00 | 6.56  | 0.00474588 | 0.04351763 | phospholipase                                                      |
| TGME49_237410 | -1.13 | 6.56  | 0.00476231 | 0.04361424 | protein phosphatase 2C domain-containing protein                   |
| TGME49_246490 | -0.91 | 7.85  | 0.00481666 | 0.04405756 | hypothetical protein                                               |
| TGME49_254915 | 2.20  | 4.55  | 0.00483664 | 0.04413833 | hypothetical protein                                               |
| TGME49_300240 | -1.37 | 5.46  | 0.00485013 | 0.04420006 | syntaxin 6, n-terminal protein                                     |
| TGME49_279350 | 1.20  | 5.67  | 0.00489168 | 0.04452392 | hypothetical protein                                               |
| TGME49_268980 | 0.80  | 8.08  | 0.00491346 | 0.04461638 | hypothetical protein                                               |
| TGME49_228690 | -1.37 | 5.58  | 0.00491388 | 0.04461638 | phosphatidylinositol 3- and 4-kinase                               |
| TGME49_235700 | 1.00  | 6.49  | 0.00492712 | 0.04467732 | sedoheptulose-1,7-bisphosphatase                                   |
| TGME49_318510 | -1.07 | 6.14  | 0.00493266 | 0.04467732 | N-ethylmaleimide-sensitive fusion protein, putative                |
| TGME49_300048 | 0.86  | 6.93  | 0.0049408  | 0.04469642 | hypothetical protein                                               |
| TGME49_260610 | -2.15 | 4.95  | 0.00495461 | 0.04476674 | methyltransferase                                                  |
| TGME49_297980 | -1.38 | 5.06  | 0.00498763 | 0.04501013 | hypothetical protein                                               |
| TGME49_222960 | -1.28 | 5.86  | 0.00501344 | 0.04518803 | SCY kinase-related protein (incomplete catalytic triad)            |
| TGME49_219860 | -0.82 | 8.22  | 0.00502004 | 0.04519252 | replication licensing factor, putative                             |
| TGME49_239480 | -1.11 | 5.81  | 0.00504541 | 0.04536581 | RNB family domain-containing protein                               |
| TGME49_273060 | 1.06  | 6.18  | 0.00508309 | 0.04548382 | ribosomal protein S17, putative                                    |
| TGME49_262500 | -1.13 | 7.65  | 0.00508259 | 0.04548382 | hypothetical protein                                               |
| TGME49_257800 | -1.66 | 4.81  | 0.00508197 | 0.04548382 | polynucleotide adenylyltransferase                                 |
| TGME49_289640 | 1.30  | 5.01  | 0.00512052 | 0.04576347 | hypothetical protein                                               |
| TGME49_202980 | -1.02 | 6.64  | 0.00513971 | 0.04582441 | hypothetical protein                                               |
| TGME49_218920 | 0.76  | 7.67  | 0.00515033 | 0.04586395 | proteasome subunit beta type, putative                             |
| TGME49_217520 | 0.87  | 8.97  | 0.00517759 | 0.04599613 | hypothetical protein                                               |
| TGME49_276120 | 1.32  | 5.87  | 0.00525844 | 0.04665401 | histone lysine methyltransferase, SET, putative                    |
| TGME49_259550 | -0.82 | 7.30  | 0.00526424 | 0.04665401 | dihydropteroate synthase                                           |
| TGME49_213790 | -1.10 | 6.02  | 0.0052952  | 0.04687234 | hypothetical protein                                               |
| TGME49_209270 | -1.44 | 4.93  | 0.00531883 | 0.0469434  | hypothetical protein                                               |
| TGME49_248900 | -1.61 | 5.41  | 0.00532224 | 0.0469434  | hypothetical protein                                               |
| TGME49_249740 | 1.12  | 6.88  | 0.00533459 | 0.04696674 | translation machinery associated tma7 protein                      |
| TGME49_232320 | -1.70 | 5.09  | 0.00533756 | 0.04696674 | hypothetical protein                                               |
| TGME49_238880 | 1.11  | 5.65  | 0.00541453 | 0.04751466 | hypothetical protein                                               |
| TGME49_293470 | -0.93 | 7.24  | 0.00543599 | 0.04760668 | hypothetical protein                                               |
| TGME49_275810 | 1.36  | 10.26 | 0.00546111 | 0.04770687 | ribosomal protein RPS10                                            |
| TGME49_313160 | -1.11 | 5.70  | 0.00546675 | 0.04770687 | hypothetical protein                                               |
| TGME49_278270 | -1.58 | 5.13  | 0.0054613  | 0.04770687 | nucleolar protein, structural component of H/ACA snoRNPs, putative |
| TGME49_210370 | 0.74  | 8.26  | 0.00549718 | 0.04775374 | hypothetical protein                                               |
| TGME49_310930 | -0.95 | 6.60  | 0.00548474 | 0.04775374 | hypothetical protein                                               |
| TGME49_320588 | -1.36 | 5.72  | 0.00548903 | 0.04775374 | glycosyl hydrolases family 35 protein                              |
| TGME49_255330 | -1.84 | 4.71  | 0.0054979  | 0.04775374 | hypothetical protein                                               |
| TGME49_254480 | 1.42  | 5.50  | 0.00550458 | 0.04775576 | WD domain, G-beta repeat-containing protein                        |
| TGME49_254510 | 1.11  | 5.21  | 0.00554367 | 0.04803865 | ankyrin repeat-containing protein                                  |
| TGME49_240060 | 0.98  | 8.72  | 0.00560032 | 0.0483599  | hypothetical protein                                               |
| TGME49_297360 | -1.00 | 6.40  | 0.00567058 | 0.04885269 | hypothetical protein                                               |
| TGME49_272650 | -1.17 | 6.03  | 0.00566645 | 0.04885269 | 3'5'-cyclic nucleotide phosphodiesterase domain-containing protein |
| TGME49_203790 | 0.81  | 8.37  | 0.0057149  | 0.04912029 | hypothetical protein                                               |
| TGME49_218910 | 1.76  | 5.41  | 0.00576249 | 0.04941465 | hypothetical protein                                               |

|               |       |      |            |            |                                |
|---------------|-------|------|------------|------------|--------------------------------|
| TGME49_209070 | 0.99  | 7.02 | 0.0057572  | 0.04941465 | hypothetical protein           |
| TGME49_233220 | -0.83 | 7.14 | 0.00577695 | 0.04943922 | hypothetical protein           |
| TGME49_267670 | -2.57 | 4.48 | 0.0057787  | 0.04943922 | hypothetical protein           |
| TGME49_312360 | -1.69 | 4.61 | 0.00583116 | 0.04977316 | hypothetical protein           |
| TGME49_242340 | 0.96  | 9.48 | 0.00586215 | 0.04992261 | ribosomal protein RPS29        |
| TGME49_249840 | -1.64 | 5.05 | 0.00585842 | 0.04992261 | dynein heavy chain 2, putative |
| TGME49_259700 | 0.83  | 7.16 | 0.00588237 | 0.04992285 | hypothetical protein           |
| TGME49_311890 | -0.86 | 7.52 | 0.00587494 | 0.04992285 | hypothetical protein           |
| TGME49_215710 | -1.14 | 6.00 | 0.00588239 | 0.04992285 | hypothetical protein           |

**Supplementary Table S6: Differential gene expression analysis of human neuronal stem cells infected with *T. gondii* EGS strain for 18 hours.**  
4.5743113

| gene ID         | logFC (EGS/CONT) | logCPM | PValue      | FDR         | Product Name                                                         |
|-----------------|------------------|--------|-------------|-------------|----------------------------------------------------------------------|
| ENSG00000263006 | 7.14             | 4.90   | 2.53265E-14 | 6.41653E-12 | Rho-associated, coiled-coil containing protein kinase 1 pseudogene 1 |
| ENSG00000133316 | 6.33             | 9.48   | 6.75197E-14 | 1.50418E-11 | WD repeat domain 74                                                  |
| ENSG00000240184 | 5.51             | 5.43   | 1.75437E-56 | 2.26683E-52 | protocadherin gamma subfamily C, 3                                   |
| ENSG00000099139 | 4.94             | 5.51   | 1.82707E-13 | 3.68868E-11 | proprotein convertase subtilisin/kexin type 5                        |
| ENSG00000230453 | 4.79             | 5.24   | 1.68679E-30 | 4.35901E-27 | ankyrin repeat domain 18B                                            |
| ENSG00000136244 | 4.71             | 4.80   | 4.08203E-36 | 1.75813E-32 | interleukin 6                                                        |
| ENSG00000159251 | 4.02             | 4.89   | 2.28142E-09 | 1.53745E-07 | actin, alpha, cardiac muscle 1                                       |
| ENSG00000169871 | 3.97             | 7.27   | 1.29031E-42 | 8.33604E-39 | tripartite motif containing 56                                       |
| ENSG00000109881 | 3.78             | 4.72   | 3.04449E-18 | 1.78808E-15 | coiled-coil domain containing 34                                     |
| ENSG00000028277 | 3.74             | 6.92   | 5.70037E-34 | 1.84136E-30 | POU class 2 homeobox 2                                               |
| ENSG00000126709 | 3.67             | 8.46   | 7.25477E-15 | 2.28631E-12 | interferon, alpha-inducible protein 6                                |
| ENSG00000152404 | 3.59             | 5.31   | 8.24867E-27 | 1.52259E-23 | CWF19-like 2, cell cycle control ( <i>S. pombe</i> )                 |
| ENSG00000124212 | 3.55             | 5.53   | 6.15055E-09 | 3.41231E-07 | prostaglandin I2 (prostacyclin) synthase                             |
| ENSG00000188483 | 3.43             | 5.16   | 1.09136E-23 | 1.41014E-20 | immediate early response 5-like                                      |
| ENSG00000204054 | 3.38             | 4.82   | 2.60028E-20 | 2.09989E-17 | long intergenic non-protein coding RNA 963                           |
| ENSG00000138061 | 3.33             | 5.34   | 1.09205E-10 | 1.00788E-08 | cytochrome P450, family 1, subfamily B, polypeptide 1                |
| ENSG00000100292 | 3.33             | 4.81   | 1.93971E-13 | 3.85584E-11 | heme oxygenase 1                                                     |
| ENSG00000115380 | 3.23             | 4.87   | 2.09094E-06 | 5.20485E-05 | EGF containing fibulin-like extracellular matrix protein 1           |
| ENSG00000218739 | 3.17             | 6.17   | 3.43121E-26 | 4.92608E-23 | CEBPZ opposite strand                                                |
| ENSG00000069011 | 3.14             | 5.72   | 1.79761E-08 | 8.41553E-07 | paired-like homeodomain 1                                            |
| ENSG00000178726 | 3.11             | 5.12   | 1.36376E-08 | 6.59969E-07 | thrombomodulin                                                       |
| ENSG00000143190 | 2.95             | 5.78   | 2.2668E-27  | 4.88156E-24 | POU class 2 homeobox 1                                               |
| ENSG00000243004 | 2.92             | 4.68   | 2.43906E-17 | 1.26061E-14 | AC005062.2                                                           |
| ENSG00000130513 | 2.72             | 5.23   | 3.46191E-15 | 1.24254E-12 | growth differentiation factor 15                                     |
| ENSG00000115541 | 2.68             | 7.01   | 1.06876E-22 | 1.25142E-19 | heat shock 10kDa protein 1                                           |
| ENSG00000136235 | 2.66             | 4.58   | 3.32999E-06 | 7.50792E-05 | glycoprotein (transmembrane) nmb                                     |
| ENSG00000100448 | 2.60             | 5.48   | 1.93401E-05 | 0.000335878 | cathepsin G                                                          |
| ENSG00000173486 | 2.60             | 7.29   | 1.16222E-22 | 1.25142E-19 | FK506 binding protein 2, 13kDa                                       |
| ENSG00000267855 | 2.60             | 4.84   | 3.19036E-07 | 1.04361E-05 | NADH dehydrogenase (ubiquinone) 1 alpha subcomplex, 7, 14.5kDa       |
| ENSG00000115461 | 2.53             | 8.14   | 1.02558E-14 | 3.01172E-12 | insulin-like growth factor binding protein 5                         |
| ENSG00000102802 | 2.53             | 5.54   | 1.14623E-09 | 8.37475E-08 | mesenteric estrogen-dependent adipogenesis                           |
| ENSG00000144034 | 2.52             | 4.91   | 4.59017E-15 | 1.56078E-12 | TP53RK binding protein                                               |
| ENSG00000139343 | 2.52             | 6.03   | 1.58387E-21 | 1.57424E-18 | small nuclear ribonucleoprotein polypeptide F                        |
| ENSG00000197182 | 2.49             | 5.03   | 1.48687E-13 | 3.09869E-11 | MIRLET7B host gene                                                   |
| ENSG00000163319 | 2.47             | 5.84   | 1.15392E-20 | 9.93988E-18 | mitochondrial ribosomal protein S18C                                 |
| ENSG00000104368 | 2.46             | 9.53   | 7.94152E-08 | 3.10947E-06 | plasminogen activator, tissue                                        |
| ENSG00000203812 | 2.44             | 5.70   | 4.6968E-19  | 3.03437E-16 | histone cluster 2, H2aa3                                             |
| ENSG00000239927 | 2.43             | 4.91   | 1.48393E-15 | 5.81025E-13 | ribonuclease P/MRP 21kDa subunit                                     |
| ENSG00000173221 | 2.42             | 5.66   | 6.2073E-16  | 2.58724E-13 | glutaredoxin (thioltransferase)                                      |
| ENSG00000179085 | 2.39             | 4.78   | 5.57222E-14 | 1.30907E-11 | dolichyl-phosphate mannosyltransferase polypeptide 3                 |
| ENSG00000151366 | 2.39             | 7.77   | 2.76189E-18 | 1.69935E-15 | NADH dehydrogenase (ubiquinone) 1, subcomplex unknown, 2, 14.5kDa    |
| ENSG00000111057 | 2.38             | 8.03   | 5.83129E-14 | 1.34546E-11 | keratin 18, type I                                                   |
| ENSG00000145708 | 2.36             | 5.32   | 3.70415E-06 | 8.25196E-05 | corticotropin releasing hormone binding protein                      |
| ENSG00000081870 | 2.36             | 5.24   | 3.46944E-14 | 8.6209E-12  | heat shock protein family B (small), member 11                       |
| ENSG00000115977 | 2.36             | 5.44   | 1.30383E-11 | 1.59898E-09 | AP2 associated kinase 1                                              |
| ENSG00000175768 | 2.36             | 6.22   | 1.07324E-15 | 4.33354E-13 | translocase of outer mitochondrial membrane 5 homolog (yeast)        |
| ENSG00000153006 | 2.34             | 5.92   | 3.50343E-19 | 2.38252E-16 | SREK1-interacting protein 1                                          |
| ENSG00000173207 | 2.30             | 4.79   | 2.67472E-13 | 5.00871E-11 | CDC28 protein kinase regulatory subunit 1B                           |
| ENSG00000185068 | 2.29             | 6.68   | 1.88907E-19 | 1.43581E-16 | GTF2H5                                                               |
| ENSG00000134597 | 2.28             | 5.17   | 1.44807E-13 | 3.06731E-11 | RNA binding motif protein, X-linked 2                                |
| ENSG00000182004 | 2.26             | 6.40   | 2.07231E-19 | 1.48757E-16 | small nuclear ribonucleoprotein polypeptide E                        |
| ENSG00000234545 | 2.26             | 5.13   | 7.38553E-09 | 3.9271E-07  | family with sequence similarity 133, member B                        |
| ENSG00000148671 | 2.22             | 5.56   | 6.97624E-09 | 3.74025E-07 | adipogenesis regulatory factor                                       |
| ENSG00000041982 | 2.22             | 7.23   | 5.37792E-13 | 9.39029E-11 | tenascin C                                                           |
| ENSG00000070814 | 2.22             | 6.51   | 1.13334E-16 | 5.0496E-14  | Treacher Collins-Franceschetti syndrome 1                            |
| ENSG00000075826 | 2.22             | 5.84   | 2.73292E-08 | 1.21347E-06 | SEC31 homolog B, COPII coating complex component                     |
| ENSG00000166803 | 2.21             | 5.26   | 3.84448E-12 | 5.32615E-10 | KIAA0101                                                             |
| ENSG00000101745 | 2.19             | 6.32   | 8.45176E-15 | 2.60012E-12 | ankyrin repeat domain 12                                             |

|                 |      |       |             |             |                                                                                    |
|-----------------|------|-------|-------------|-------------|------------------------------------------------------------------------------------|
| ENSG00000138433 | 2.18 | 6.13  | 3.45603E-17 | 1.71751E-14 | corepressor interacting with RBPJ, 1                                               |
| ENSG00000244509 | 2.18 | 7.30  | 7.49569E-11 | 7.39327E-09 | apolipoprotein B mRNA editing enzyme, catalytic polypeptide-like 3C                |
| ENSG00000166012 | 2.17 | 7.41  | 3.61373E-07 | 1.16732E-05 | TATA box binding protein (TBP)-associated factor, RNA polymerase I, D, 41kDa       |
| ENSG00000008952 | 2.15 | 8.30  | 4.18534E-12 | 5.6925E-10  | SEC62 homolog (S. cerevisiae)                                                      |
| ENSG00000243147 | 2.14 | 6.61  | 3.21975E-18 | 1.8088E-15  | mitochondrial ribosomal protein L33                                                |
| ENSG00000158417 | 2.14 | 8.45  | 2.00635E-13 | 3.92788E-11 | eukaryotic translation initiation factor 5B                                        |
| ENSG00000141905 | 2.13 | 7.64  | 9.456E-15   | 2.84142E-12 | nuclear factor I/C (CCAAT-binding transcription factor)                            |
| ENSG00000106591 | 2.13 | 6.17  | 6.22481E-18 | 3.35128E-15 | mitochondrial ribosomal protein L32                                                |
| ENSG00000109099 | 2.11 | 5.71  | 3.43432E-13 | 6.24998E-11 | peripheral myelin protein 22                                                       |
| ENSG00000187608 | 2.10 | 7.90  | 6.00322E-12 | 7.83511E-10 | ISG15 ubiquitin-like modifier                                                      |
| ENSG00000143977 | 2.10 | 6.46  | 1.76529E-15 | 6.51694E-13 | small nuclear ribonucleoprotein polypeptide G                                      |
| ENSG00000132432 | 2.10 | 8.14  | 1.50969E-14 | 4.15037E-12 | Sec61 gamma subunit                                                                |
| ENSG00000164182 | 2.09 | 5.83  | 2.11812E-13 | 4.08482E-11 | NADH dehydrogenase (ubiquinone) complex I, assembly factor 2                       |
| ENSG00000132963 | 2.08 | 8.33  | 1.78505E-13 | 3.66105E-11 | proteasome maturation protein                                                      |
| ENSG00000164171 | 2.08 | 5.01  | 1.16153E-08 | 5.83975E-07 | integrin, alpha 2 (CD49B, alpha 2 subunit of VLA-2 receptor)                       |
| ENSG00000120688 | 2.06 | 5.13  | 1.84963E-10 | 1.59327E-08 | WW domain binding protein 4                                                        |
| ENSG00000134825 | 2.06 | 6.57  | 1.2865E-16  | 5.54095E-14 | transmembrane protein 258                                                          |
| ENSG00000008394 | 2.05 | 7.13  | 2.65745E-13 | 5.00871E-11 | microsomal glutathione S-transferase 1                                             |
| ENSG00000152518 | 2.03 | 4.78  | 2.47716E-09 | 1.64141E-07 | ZFP36 ring finger protein-like 2                                                   |
| ENSG00000135637 | 2.03 | 6.15  | 6.44284E-15 | 2.0812E-12  | coiled-coil domain containing 142                                                  |
| ENSG00000213741 | 2.02 | 9.15  | 1.59012E-10 | 1.40726E-08 | ribosomal protein S29                                                              |
| ENSG00000184752 | 2.00 | 6.80  | 5.92046E-15 | 1.96149E-12 | NADH dehydrogenase (ubiquinone) 1 alpha subcomplex, 12                             |
| ENSG00000262771 | 1.98 | 7.09  | 2.20075E-14 | 5.80324E-12 | single-stranded DNA binding protein 1, mitochondrial                               |
| ENSG00000142396 | 1.98 | 4.87  | 9.76173E-11 | 9.27437E-09 | endogenous retrovirus group K3, member 1                                           |
| ENSG00000116717 | 1.98 | 7.83  | 1.13936E-13 | 2.45362E-11 | growth arrest and DNA-damage-inducible, alpha                                      |
| ENSG00000162385 | 1.98 | 4.86  | 2.28458E-09 | 1.53745E-07 | mago homolog, exon junction complex core component                                 |
| ENSG00000177954 | 1.98 | 9.03  | 4.09699E-10 | 3.30857E-08 | ribosomal protein S27                                                              |
| ENSG00000108691 | 1.98 | 5.70  | 9.46627E-09 | 4.85371E-07 | chemokine (C-C motif) ligand 2                                                     |
| ENSG00000203875 | 1.98 | 5.84  | 6.68499E-14 | 1.50418E-11 | small nucleolar RNA host gene 5                                                    |
| ENSG00000143771 | 1.96 | 6.37  | 4.38785E-15 | 1.53231E-12 | cornichon family AMPA receptor auxiliary protein 4                                 |
| ENSG00000128524 | 1.96 | 7.68  | 6.9337E-12  | 8.95904E-10 | ATPase, H+ transporting, lysosomal 14kDa, V1 subunit F                             |
| ENSG00000198959 | 1.96 | 6.02  | 7.08791E-05 | 0.000985822 | transglutaminase 2                                                                 |
| ENSG00000235385 | 1.95 | 5.17  | 0.000854403 | 0.007272559 | GS1-600G8.5                                                                        |
| ENSG00000179958 | 1.94 | 5.38  | 5.7602E-11  | 6.00222E-09 | dCTP pyrophosphatase 1                                                             |
| ENSG00000168003 | 1.94 | 7.50  | 1.54161E-12 | 2.42916E-10 | solute carrier family 3 (amino acid transporter heavy chain), member 2             |
| ENSG00000171858 | 1.93 | 8.67  | 9.30779E-11 | 8.91949E-09 | ribosomal protein S21                                                              |
| ENSG00000198258 | 1.92 | 7.95  | 1.79808E-12 | 2.79916E-10 | ubiquitin-like 5                                                                   |
| ENSG00000173436 | 1.91 | 7.44  | 9.98563E-14 | 2.18685E-11 | mitochondrial inner membrane organizing system 1                                   |
| ENSG00000197323 | 1.91 | 6.34  | 1.13085E-10 | 1.03629E-08 | tripartite motif containing 33                                                     |
| ENSG00000163156 | 1.91 | 5.61  | 4.69074E-12 | 6.1846E-10  | sodium channel modifier 1                                                          |
| ENSG00000143256 | 1.91 | 6.23  | 1.30676E-14 | 3.67057E-12 | prefoldin subunit 2                                                                |
| ENSG00000112769 | 1.91 | 4.93  | 0.000259545 | 0.002781089 | laminin, alpha 4                                                                   |
| ENSG00000113811 | 1.90 | 6.10  | 1.92631E-14 | 5.18538E-12 | selenoprotein K                                                                    |
| ENSG00000082515 | 1.89 | 5.00  | 6.37986E-10 | 5.02648E-08 | mitochondrial ribosomal protein L22                                                |
| ENSG00000109534 | 1.88 | 4.86  | 7.78797E-10 | 6.02565E-08 | GAR1 homolog, ribonucleoprotein                                                    |
| ENSG00000127922 | 1.88 | 6.78  | 5.09137E-14 | 1.21825E-11 | split hand/foot malformation (ectrodactyly) type 1                                 |
| ENSG00000198211 | 1.88 | 6.41  | 4.37852E-13 | 7.85762E-11 | tubulin, beta 3 class III                                                          |
| ENSG00000090263 | 1.87 | 5.60  | 6.4075E-11  | 6.57074E-09 | mitochondrial ribosomal protein S33                                                |
| ENSG00000217930 | 1.87 | 4.71  | 1.82383E-09 | 1.26698E-07 | presequence translocase-associated motor 16 homolog (S. cerevisiae)                |
| ENSG00000123975 | 1.87 | 5.41  | 3.94632E-09 | 2.39672E-07 | CDC28 protein kinase regulatory subunit 2                                          |
| ENSG00000104825 | 1.86 | 5.77  | 2.52837E-10 | 2.13524E-08 | nuclear factor of kappa light polypeptide gene enhancer in B-cells inhibitor, beta |
| ENSG00000229833 | 1.86 | 5.16  | 1.33695E-08 | 6.53829E-07 | PET100 homolog                                                                     |
| ENSG00000123353 | 1.86 | 6.46  | 1.14166E-14 | 3.27809E-12 | ORMDL sphingolipid biosynthesis regulator 2                                        |
| ENSG00000167779 | 1.86 | 5.99  | 4.83586E-11 | 5.12165E-09 | insulin-like growth factor binding protein 6                                       |
| ENSG00000147862 | 1.86 | 5.11  | 1.05798E-07 | 3.99713E-06 | nuclear factor I/B                                                                 |
| ENSG00000177426 | 1.85 | 5.15  | 1.31109E-10 | 1.18465E-08 | TGFB-induced factor homeobox 1                                                     |
| ENSG00000080823 | 1.85 | 4.85  | 1.08361E-06 | 2.99815E-05 | MOK protein kinase                                                                 |
| ENSG00000137815 | 1.82 | 7.04  | 2.79064E-12 | 4.00643E-10 | RTF1 homolog, Paf1/RNA polymerase II complex component                             |
| ENSG00000186010 | 1.82 | 7.16  | 1.13991E-09 | 8.37475E-08 | NADH dehydrogenase (ubiquinone) 1 alpha subcomplex, 13                             |
| ENSG00000127540 | 1.82 | 6.49  | 1.29054E-12 | 2.08438E-10 | ubiquinol-cytochrome c reductase, complex III subunit XI                           |
| ENSG00000214022 | 1.82 | 4.60  | 4.66084E-08 | 1.97451E-06 | replication initiator 1                                                            |
| ENSG00000154723 | 1.81 | 7.31  | 8.27462E-13 | 1.35337E-10 | ATP synthase, H+ transporting, mitochondrial Fo complex, subunit F6                |
| ENSG00000103121 | 1.81 | 5.41  | 6.64039E-11 | 6.75595E-09 | C-x(9)-C motif containing 2                                                        |
| ENSG00000130402 | 1.80 | 11.77 | 6.71276E-06 | 0.000137894 | actinin, alpha 4                                                                   |
| ENSG00000125676 | 1.80 | 6.79  | 1.44811E-09 | 1.03376E-07 | THO complex 2                                                                      |
| ENSG00000111832 | 1.79 | 6.85  | 4.34468E-10 | 3.48681E-08 | RWD domain containing 1                                                            |
| ENSG00000176731 | 1.78 | 5.48  | 6.76664E-11 | 6.8306E-09  | chromosome 8 open reading frame 59                                                 |
| ENSG00000198498 | 1.78 | 4.83  | 2.68296E-08 | 1.19874E-06 | translation machinery associated 16 homolog (S. cerevisiae)                        |
| ENSG00000135931 | 1.76 | 6.11  | 1.85386E-12 | 2.81808E-10 | armadillo repeat containing 9                                                      |

|                 |      |       |             |             |                                                                                   |
|-----------------|------|-------|-------------|-------------|-----------------------------------------------------------------------------------|
| ENSG00000185088 | 1.76 | 8.31  | 9.6579E-10  | 7.29764E-08 | ribosomal protein S27-like                                                        |
| ENSG00000174917 | 1.75 | 5.99  | 3.30511E-10 | 2.72238E-08 | chromosome 19 open reading frame 70                                               |
| ENSG00000131469 | 1.75 | 10.34 | 9.73424E-07 | 2.74022E-05 | ribosomal protein L27                                                             |
| ENSG00000177410 | 1.74 | 6.33  | 4.80787E-13 | 8.50992E-11 | ZNF1 antisense RNA 1                                                              |
| ENSG00000175063 | 1.74 | 4.66  | 2.28524E-06 | 5.55707E-05 | ubiquitin-conjugating enzyme E2C                                                  |
| ENSG00000174720 | 1.74 | 6.08  | 1.36113E-11 | 1.64366E-09 | La ribonucleoprotein domain family, member 7                                      |
| ENSG00000154582 | 1.74 | 7.10  | 1.31175E-11 | 1.59898E-09 | transcription elongation factor B (SIII), polypeptide 1 (15kDa, elongin C)        |
| ENSG00000134248 | 1.73 | 7.03  | 1.79954E-11 | 2.15295E-09 | late endosomal/lysosomal adaptor, MAPK and MTOR activator 5                       |
| ENSG00000171303 | 1.73 | 8.28  | 3.7008E-09  | 2.31005E-07 | potassium channel, two pore domain subfamily K, member 3                          |
| ENSG00000111331 | 1.73 | 4.59  | 0.000392631 | 0.003867238 | 2'-5'-oligoadenylate synthetase 3, 100kDa                                         |
| ENSG00000171246 | 1.72 | 6.48  | 1.02597E-08 | 5.20688E-07 | neuronal pentraxin I                                                              |
| ENSG00000105185 | 1.72 | 6.86  | 4.43008E-12 | 5.90114E-10 | programmed cell death 5                                                           |
| ENSG00000101966 | 1.71 | 6.67  | 1.42765E-10 | 1.28102E-08 | X-linked inhibitor of apoptosis, E3 ubiquitin protein ligase                      |
| ENSG00000165233 | 1.71 | 5.76  | 1.88955E-10 | 1.61688E-08 | chromosome 9 open reading frame 89                                                |
| ENSG00000148688 | 1.71 | 4.95  | 6.0209E-09  | 3.36779E-07 | ribonuclease P/MRP 30kDa subunit                                                  |
| ENSG00000130770 | 1.71 | 7.44  | 2.65618E-11 | 3.03721E-09 | ATPase inhibitory factor 1                                                        |
| ENSG00000139168 | 1.71 | 6.01  | 1.7991E-10  | 1.56014E-08 | zinc finger CCHC-type and RNA binding motif 1                                     |
| ENSG00000137965 | 1.71 | 5.35  | 1.18221E-06 | 3.23631E-05 | interferon-induced protein 44                                                     |
| ENSG00000161011 | 1.70 | 8.65  | 5.82501E-06 | 0.000122183 | sequestosome 1                                                                    |
| ENSG00000107984 | 1.69 | 5.45  | 9.79136E-08 | 3.75413E-06 | dickkopf WNT signaling pathway inhibitor 1                                        |
| ENSG00000146066 | 1.69 | 5.96  | 2.79636E-11 | 3.16945E-09 | HIG1 hypoxia inducible domain family, member 2A                                   |
| ENSG00000214413 | 1.69 | 4.67  | 7.30259E-08 | 2.92126E-06 | BBSome interacting protein 1                                                      |
| ENSG00000165389 | 1.68 | 5.31  | 1.34601E-08 | 6.53829E-07 | serine palmitoyltransferase, small subunit A                                      |
| ENSG00000203805 | 1.67 | 4.64  | 1.69456E-05 | 0.000299117 | phosphatidic acid phosphatase type 2 domain containing 1A                         |
| ENSG00000226710 | 1.67 | 7.61  | 1.73928E-10 | 1.51846E-08 | chromosome 6 open reading frame 48                                                |
| ENSG00000162772 | 1.66 | 6.18  | 1.19409E-08 | 5.96566E-07 | activating transcription factor 3                                                 |
| ENSG00000163827 | 1.66 | 5.27  | 6.74184E-07 | 2.04968E-05 | leucine rich repeat containing 2                                                  |
| ENSG00000213853 | 1.66 | 5.85  | 3.81847E-10 | 3.10305E-08 | epithelial membrane protein 2                                                     |
| ENSG00000133169 | 1.65 | 6.68  | 2.77491E-07 | 9.27325E-06 | brain expressed, X-linked 1                                                       |
| ENSG00000060339 | 1.65 | 6.99  | 4.88523E-09 | 2.8562E-07  | cell division cycle and apoptosis regulator 1                                     |
| ENSG00000114784 | 1.65 | 5.31  | 5.75171E-09 | 3.23121E-07 | eukaryotic translation initiation factor 1B                                       |
| ENSG00000196352 | 1.65 | 4.73  | 1.00164E-05 | 0.000191452 | CD55 molecule, decay accelerating factor for complement (Cromer blood group)      |
| ENSG00000182899 | 1.64 | 9.43  | 9.86414E-07 | 2.77075E-05 | ribosomal protein L35a                                                            |
| ENSG00000125977 | 1.64 | 8.01  | 9.36117E-08 | 3.61062E-06 | eukaryotic translation initiation factor 2, subunit 2 beta, 38kDa                 |
| ENSG00000147669 | 1.64 | 6.18  | 3.77151E-11 | 4.1298E-09  | polymerase (RNA) II (DNA directed) polypeptide K, 7.0kDa                          |
| ENSG00000100902 | 1.64 | 7.37  | 4.15264E-09 | 2.49564E-07 | proteasome (prosome, macropain) subunit, alpha type, 6                            |
| ENSG00000105825 | 1.63 | 6.85  | 8.19816E-09 | 4.25415E-07 | tissue factor pathway inhibitor 2                                                 |
| ENSG00000185112 | 1.63 | 5.63  | 1.88039E-06 | 4.7454E-05  | family with sequence similarity 43, member A                                      |
| ENSG00000214046 | 1.62 | 6.25  | 2.64304E-11 | 3.03721E-09 | small integral membrane protein 7                                                 |
| ENSG00000125743 | 1.62 | 7.85  | 3.66803E-09 | 2.30071E-07 | small nuclear ribonucleoprotein D2 polypeptide 16.5kDa                            |
| ENSG00000119705 | 1.61 | 6.13  | 2.88845E-10 | 2.40785E-08 | SRA stem-loop interacting RNA binding protein                                     |
| ENSG00000148690 | 1.61 | 5.04  | 2.57854E-07 | 8.67639E-06 | fragile site, folic acid type, rare, fra(10)(q23.3) or fra(10)(q24.2) candidate 1 |
| ENSG00000145354 | 1.61 | 5.65  | 9.15833E-10 | 6.96087E-08 | CDGSH iron sulfur domain 2                                                        |
| ENSG00000104763 | 1.61 | 6.91  | 4.3423E-07  | 1.36361E-05 | N-acylsphingosine amidohydrolase (acid ceramidase) 1                              |
| ENSG00000160799 | 1.61 | 4.81  | 2.37558E-07 | 8.09891E-06 | coiled-coil domain containing 12                                                  |
| ENSG00000227051 | 1.61 | 7.03  | 1.0404E-10  | 9.7413E-09  | chromosome 14 open reading frame 132                                              |
| ENSG00000171453 | 1.61 | 4.81  | 1.10626E-07 | 4.15523E-06 | polymerase (RNA) I polypeptide C, 30kDa                                           |
| ENSG00000147535 | 1.61 | 4.60  | 6.53507E-07 | 1.99621E-05 | phosphatidic acid phosphatase type 2 domain containing 1B                         |
| ENSG00000136897 | 1.60 | 4.96  | 7.68263E-08 | 3.04501E-06 | mitochondrial ribosomal protein L50                                               |
| ENSG00000196199 | 1.60 | 6.07  | 2.03952E-07 | 7.14164E-06 | M-phase phosphoprotein 8                                                          |
| ENSG00000130332 | 1.60 | 5.55  | 1.30667E-09 | 9.39187E-08 | LSM7 homolog, U6 small nuclear RNA and mRNA degradation associated                |
| ENSG00000099337 | 1.60 | 6.33  | 1.34349E-08 | 6.53829E-07 | potassium channel, two pore domain subfamily K, member 6                          |
| ENSG00000173113 | 1.60 | 7.11  | 1.65293E-09 | 1.16708E-07 | tRNA methyltransferase 11-2 homolog (S. cerevisiae)                               |
| ENSG00000273397 | 1.59 | 6.55  | 7.88431E-11 | 7.71766E-09 | NADH dehydrogenase (ubiquinone) 1 alpha subcomplex, 6, 14kDa                      |
| ENSG00000254999 | 1.59 | 8.28  | 8.12302E-09 | 4.24929E-07 | BRICK1, SCAR/WAVE actin-nucleating complex subunit                                |
| ENSG00000282031 | 1.59 | 5.50  | 1.81872E-07 | 6.45594E-06 | transmembrane BAX inhibitor motif containing 4                                    |
| ENSG00000119878 | 1.58 | 4.96  | 9.89984E-08 | 3.78449E-06 | cysteine-rich PDZ-binding protein                                                 |
| ENSG00000151461 | 1.58 | 6.21  | 6.63255E-09 | 3.616E-07   | UPF2 regulator of nonsense transcripts homolog (yeast)                            |
| ENSG00000143158 | 1.57 | 6.87  | 2.44593E-09 | 1.62906E-07 | mitochondrial pyruvate carrier 2                                                  |
| ENSG00000166347 | 1.57 | 5.13  | 8.64979E-08 | 3.34622E-06 | cytochrome b5 type A (microsomal)                                                 |
| ENSG00000161980 | 1.57 | 4.65  | 2.06926E-06 | 5.18157E-05 | polymerase (RNA) III (DNA directed) polypeptide K, 12.3 kDa                       |
| ENSG00000270898 | 1.57 | 4.57  | 1.25034E-06 | 3.40118E-05 | GPR75-ASB3 readthrough                                                            |
| ENSG00000167863 | 1.57 | 7.60  | 1.93148E-09 | 1.32748E-07 | ATP synthase, H+ transporting, mitochondrial Fo complex, subunit d                |
| ENSG00000101361 | 1.57 | 7.35  | 7.79114E-09 | 4.12579E-07 | NOP56 ribonucleoprotein                                                           |
| ENSG00000156603 | 1.56 | 4.97  | 3.1018E-07  | 1.02241E-05 | mediator complex subunit 19                                                       |
| ENSG00000120963 | 1.56 | 5.45  | 5.18961E-09 | 2.98497E-07 | zinc finger protein 706                                                           |
| ENSG00000112312 | 1.56 | 4.60  | 8.13621E-07 | 2.37309E-05 | geminin, DNA replication inhibitor                                                |
| ENSG00000146425 | 1.56 | 6.70  | 5.29409E-09 | 3.01343E-07 | dynein, light chain, Tctex-type 1                                                 |
| ENSG00000145050 | 1.56 | 6.70  | 2.21771E-09 | 1.50816E-07 | mesencephalic astrocyte-derived neurotrophic factor                               |

|                 |      |       |             |             |                                                                                                                                                                                                                      |
|-----------------|------|-------|-------------|-------------|----------------------------------------------------------------------------------------------------------------------------------------------------------------------------------------------------------------------|
| ENSG0000060762  | 1.56 | 5.08  | 6.02293E-08 | 2.48633E-06 | mitochondrial pyruvate carrier 1                                                                                                                                                                                     |
| ENSG00000665518 | 1.55 | 6.64  | 2.69608E-10 | 2.26208E-08 | NADH dehydrogenase (ubiquinone) 1 beta subcomplex, 4, 15kDa                                                                                                                                                          |
| ENSG00000189403 | 1.55 | 8.14  | 6.20538E-08 | 2.53077E-06 | high mobility group box 1                                                                                                                                                                                            |
| ENSG00000185043 | 1.55 | 6.91  | 3.3079E-10  | 2.72238E-08 | calcium and integrin binding 1 (calmyrin)                                                                                                                                                                            |
| ENSG00000136819 | 1.55 | 6.45  | 2.21489E-09 | 1.50816E-07 | chromosome 9 open reading frame 78                                                                                                                                                                                   |
| ENSG00000172809 | 1.54 | 8.62  | 1.04129E-07 | 3.95074E-06 | ribosomal protein L38                                                                                                                                                                                                |
| ENSG00000197063 | 1.54 | 6.70  | 3.86894E-07 | 1.23828E-05 | v-maf avian musculoaponeurotic fibrosarcoma oncogene homolog G                                                                                                                                                       |
| ENSG00000133398 | 1.54 | 5.59  | 3.95095E-09 | 2.39672E-07 | mediator complex subunit 10                                                                                                                                                                                          |
| ENSG00000104332 | 1.54 | 6.50  | 8.37926E-05 | 0.001133701 | secreted frizzled-related protein 1                                                                                                                                                                                  |
| ENSG00000186577 | 1.54 | 4.96  | 1.0152E-06  | 2.82986E-05 | chromosome 6 open reading frame 1                                                                                                                                                                                    |
| ENSG00000176953 | 1.54 | 5.90  | 2.41587E-07 | 8.19304E-06 | nuclear factor of activated T-cells, cytoplasmic, calcineurin-dependent 2 interacting protein                                                                                                                        |
| ENSG00000273686 | 1.53 | 11.26 | 0.000165199 | 0.001967399 | beta-2-microglobulin                                                                                                                                                                                                 |
| ENSG00000163170 | 1.53 | 4.98  | 2.77745E-07 | 9.27325E-06 | bolA family member 3                                                                                                                                                                                                 |
| ENSG00000135185 | 1.53 | 4.60  | 1.50642E-06 | 3.91639E-05 | transmembrane protein 243, mitochondrial                                                                                                                                                                             |
| ENSG00000180992 | 1.53 | 6.19  | 4.1957E-09  | 2.50331E-07 | mitochondrial ribosomal protein L14                                                                                                                                                                                  |
| ENSG00000245910 | 1.53 | 5.99  | 1.06339E-09 | 7.89658E-08 | small nucleolar RNA host gene 6                                                                                                                                                                                      |
| ENSG00000120875 | 1.52 | 7.94  | 7.80707E-08 | 3.07546E-06 | dual specificity phosphatase 4                                                                                                                                                                                       |
| ENSG00000116473 | 1.52 | 5.84  | 2.57786E-09 | 1.69079E-07 | RAP1A, member of RAS oncogene family                                                                                                                                                                                 |
| ENSG00000163125 | 1.52 | 5.71  | 5.19789E-09 | 2.98497E-07 | regulation of nuclear pre-mRNA domain containing 2                                                                                                                                                                   |
| ENSG00000078124 | 1.52 | 4.97  | 4.34801E-07 | 1.36361E-05 | alkaline ceramidase 3                                                                                                                                                                                                |
| ENSG00000205981 | 1.52 | 4.90  | 2.30276E-07 | 7.91328E-06 | DnaJ (Hsp40) homolog, subfamily C, member 19                                                                                                                                                                         |
| ENSG00000275724 | 1.51 | 6.05  | 1.88752E-09 | 1.30421E-07 | NADH dehydrogenase (Ubiquinone) 1 alpha subcomplex, 3, 9kDa, isoform CRA_e; NDUFA3 protein; cDNA FLJ76508, highly similar to Homo sapiens NADH dehydrogenase (ubiquinone) 1 alpha subcomplex, 3, 9kDa (NDUFA3), mRNA |
| ENSG00000172336 | 1.51 | 5.14  | 1.36457E-07 | 5.08116E-06 | POP7 homolog, ribonuclease P/MRP subunit                                                                                                                                                                             |
| ENSG00000139233 | 1.51 | 5.93  | 3.73244E-09 | 2.3186E-07  | LLP homolog, long-term synaptic facilitation (Aplysia)                                                                                                                                                               |
| ENSG00000164258 | 1.50 | 6.59  | 3.80182E-09 | 2.3392E-07  | NADH dehydrogenase (ubiquinone) Fe-S protein 4, 18kDa (NADH-coenzyme Q reductase)                                                                                                                                    |
| ENSG00000197956 | 1.50 | 12.06 | 9.17083E-05 | 0.001209145 | S100 calcium binding protein A6                                                                                                                                                                                      |
| ENSG00000145247 | 1.50 | 5.61  | 6.69716E-09 | 3.63588E-07 | OClA domain containing 2                                                                                                                                                                                             |
| ENSG00000117614 | 1.50 | 5.68  | 6.29487E-09 | 3.4759E-07  | SYF2 pre-mRNA-splicing factor                                                                                                                                                                                        |
| ENSG00000141837 | 1.50 | 5.33  | 0.000106454 | 0.001370012 | calcium channel, voltage-dependent, P/Q type, alpha 1A subunit                                                                                                                                                       |
| ENSG00000278461 | 1.50 | 5.31  | 2.43928E-07 | 8.25076E-06 | mitochondrial ribosomal protein S36                                                                                                                                                                                  |
| ENSG00000120533 | 1.49 | 6.43  | 1.04853E-09 | 7.83126E-08 | enhancer of yellow 2 homolog (Drosophila)                                                                                                                                                                            |
| ENSG00000113732 | 1.49 | 8.88  | 1.6765E-07  | 5.98398E-06 | ATPase, H+ transporting, lysosomal 9kDa, V0 subunit e1                                                                                                                                                               |
| ENSG00000100142 | 1.48 | 5.92  | 6.41E-09    | 3.52441E-07 | polymerase (RNA) II (DNA directed) polypeptide F                                                                                                                                                                     |
| ENSG00000180573 | 1.48 | 6.06  | 4.68083E-09 | 2.74914E-07 | histone cluster 1, H2ac                                                                                                                                                                                              |
| ENSG00000122641 | 1.48 | 9.21  | 6.87604E-06 | 0.000140801 | inhibin, beta A                                                                                                                                                                                                      |
| ENSG00000197070 | 1.48 | 4.77  | 5.35754E-06 | 0.00011367  | arrestin domain containing 1                                                                                                                                                                                         |
| ENSG00000125356 | 1.47 | 7.18  | 8.16959E-09 | 4.25415E-07 | NADH dehydrogenase (ubiquinone) 1 alpha subcomplex, 1, 7.5kDa                                                                                                                                                        |
| ENSG00000255717 | 1.47 | 5.20  | 3.01077E-05 | 0.000482821 | small nucleolar RNA host gene 1                                                                                                                                                                                      |
| ENSG00000124172 | 1.47 | 8.64  | 1.83656E-07 | 6.50141E-06 | ATP synthase, H+ transporting, mitochondrial F1 complex, epsilon subunit                                                                                                                                             |
| ENSG00000189043 | 1.46 | 7.19  | 1.67374E-07 | 5.98398E-06 | NDUFA4, mitochondrial complex associated                                                                                                                                                                             |
| ENSG00000183648 | 1.45 | 6.24  | 1.58763E-09 | 1.12713E-07 | NADH dehydrogenase (ubiquinone) 1 beta subcomplex, 1, 7kDa                                                                                                                                                           |
| ENSG00000197903 | 1.45 | 6.71  | 2.19042E-08 | 1.00009E-06 | histone cluster 1, H2bk                                                                                                                                                                                              |
| ENSG00000225921 | 1.45 | 6.60  | 1.47373E-08 | 7.07882E-07 | nucleolar protein 7, 27kDa                                                                                                                                                                                           |
| ENSG00000107833 | 1.45 | 4.68  | 2.77287E-05 | 0.00044954  | nucleophosmin/nucleoplasmin 3                                                                                                                                                                                        |
| ENSG00000171735 | 1.45 | 5.35  | 1.50469E-07 | 5.50767E-06 | calmodulin binding transcription activator 1                                                                                                                                                                         |
| ENSG00000111596 | 1.45 | 5.98  | 1.02759E-08 | 5.20688E-07 | CCR4-NOT transcription complex, subunit 2                                                                                                                                                                            |
| ENSG00000125971 | 1.45 | 7.61  | 2.36315E-08 | 1.06763E-06 | dynein, light chain, roadblock-type 1                                                                                                                                                                                |
| ENSG00000175550 | 1.44 | 8.77  | 1.31175E-06 | 3.51641E-05 | DR1-associated protein 1 (negative cofactor 2 alpha)                                                                                                                                                                 |
| ENSG00000124882 | 1.44 | 6.09  | 2.06346E-07 | 7.18651E-06 | epiregulin                                                                                                                                                                                                           |
| ENSG00000156482 | 1.43 | 9.33  | 1.12744E-05 | 0.000209005 | ribosomal protein L30                                                                                                                                                                                                |
| ENSG00000136770 | 1.43 | 5.12  | 7.39728E-07 | 2.19725E-05 | DnaJ (Hsp40) homolog, subfamily C, member 1                                                                                                                                                                          |
| ENSG00000175606 | 1.43 | 4.81  | 2.15615E-06 | 5.33708E-05 | transmembrane protein 70                                                                                                                                                                                             |
| ENSG00000167772 | 1.43 | 5.75  | 2.59032E-05 | 0.00042821  | angiotensin-like 4                                                                                                                                                                                                   |
| ENSG00000124357 | 1.42 | 7.43  | 1.31952E-08 | 6.4827E-07  | N-acetylglucosamine kinase                                                                                                                                                                                           |
| ENSG00000164114 | 1.42 | 4.68  | 1.48149E-05 | 0.000265865 | microtubule-associated protein 9                                                                                                                                                                                     |
| ENSG00000130311 | 1.42 | 7.36  | 1.8368E-08  | 8.56798E-07 | DET1 and DDB1 associated 1                                                                                                                                                                                           |
| ENSG00000100836 | 1.42 | 6.99  | 2.25074E-08 | 1.02042E-06 | poly(A) binding protein, nuclear 1                                                                                                                                                                                   |
| ENSG00000055044 | 1.42 | 6.43  | 1.8711E-06  | 4.7405E-05  | NOP58 ribonucleoprotein                                                                                                                                                                                              |
| ENSG00000235162 | 1.42 | 7.14  | 2.46479E-08 | 1.10967E-06 | chromosome 12 open reading frame 75                                                                                                                                                                                  |
| ENSG00000221983 | 1.41 | 9.51  | 6.45217E-06 | 0.000133603 | ubiquitin A-52 residue ribosomal protein fusion product 1                                                                                                                                                            |
| ENSG00000138814 | 1.40 | 5.62  | 9.67261E-06 | 0.00018543  | protein phosphatase 3, catalytic subunit, alpha isozyme                                                                                                                                                              |
| ENSG00000176788 | 1.39 | 8.32  | 2.18697E-06 | 5.38245E-05 | brain abundant, membrane attached signal protein 1                                                                                                                                                                   |
| ENSG00000138398 | 1.39 | 6.40  | 6.20891E-08 | 2.53077E-06 | peptidylprolyl isomerase G (cyclophilin G)                                                                                                                                                                           |
| ENSG00000169715 | 1.39 | 7.76  | 6.87469E-07 | 2.08028E-05 | metallothionein 1E                                                                                                                                                                                                   |
| ENSG00000163463 | 1.39 | 6.03  | 1.36637E-06 | 3.64019E-05 | keratinocyte associated protein 2                                                                                                                                                                                    |

|                 |      |       |             |             |                                                                                   |
|-----------------|------|-------|-------------|-------------|-----------------------------------------------------------------------------------|
| ENSG00000170088 | 1.38 | 5.27  | 7.37427E-07 | 2.19546E-05 | transmembrane protein 192                                                         |
| ENSG00000178127 | 1.38 | 6.81  | 4.69544E-08 | 1.98267E-06 | NADH dehydrogenase (ubiquinone) flavoprotein 2, 24kDa                             |
| ENSG00000130066 | 1.38 | 7.81  | 8.02644E-06 | 0.00015882  | spermidine/spermine N1-acetyltransferase 1                                        |
| ENSG00000106803 | 1.38 | 7.33  | 1.40435E-07 | 5.19931E-06 | Sec61 beta subunit                                                                |
| ENSG00000178896 | 1.38 | 4.95  | 3.04018E-06 | 6.98879E-05 | exosome component 4                                                               |
| ENSG00000136888 | 1.37 | 7.20  | 3.87171E-07 | 1.23828E-05 | ATPase, H+ transporting, lysosomal 13kDa, V1 subunit G1                           |
| ENSG00000067082 | 1.37 | 8.47  | 2.34374E-06 | 5.67107E-05 | Kruppel-like factor 6                                                             |
| ENSG00000071462 | 1.37 | 6.54  | 9.40378E-09 | 4.84088E-07 | Williams Beuren syndrome chromosome region 22                                     |
| ENSG00000183726 | 1.37 | 7.75  | 1.10229E-07 | 4.15238E-06 | transmembrane protein 50A                                                         |
| ENSG00000111237 | 1.37 | 6.77  | 1.85823E-08 | 8.60582E-07 | VPS29 retromer complex component                                                  |
| ENSG00000164405 | 1.37 | 7.28  | 7.60617E-08 | 3.02398E-06 | ubiquinol-cytochrome c reductase, complex III subunit VII, 9.5kDa                 |
| ENSG00000109390 | 1.37 | 6.30  | 3.68001E-08 | 1.59028E-06 | NADH dehydrogenase (ubiquinone) 1, subcomplex unknown, 1, 6kDa                    |
| ENSG00000115363 | 1.37 | 5.80  | 3.61323E-07 | 1.16732E-05 | eva-1 homolog A (C. elegans)                                                      |
| ENSG00000100889 | 1.37 | 4.70  | 8.24528E-05 | 0.001118228 | phosphoenolpyruvate carboxykinase 2 (mitochondrial)                               |
| ENSG00000228253 | 1.36 | 10.31 | 4.12574E-05 | 0.000638427 | MT-ATP8                                                                           |
| ENSG00000104823 | 1.35 | 5.73  | 6.59116E-07 | 2.00859E-05 | enoyl CoA hydratase 1, peroxisomal                                                |
| ENSG00000100028 | 1.35 | 6.80  | 2.89933E-08 | 1.27423E-06 | small nuclear ribonucleoprotein D3 polypeptide 18kDa                              |
| ENSG00000112667 | 1.35 | 4.70  | 2.02396E-05 | 0.000348688 | 2'-deoxynucleoside 5'-phosphate N-hydrolase 1                                     |
| ENSG00000188486 | 1.34 | 5.68  | 2.62756E-05 | 0.000431943 | H2A histone family, member X                                                      |
| ENSG00000232388 | 1.34 | 4.74  | 1.48575E-05 | 0.000266228 | long intergenic non-protein coding RNA 493                                        |
| ENSG00000184557 | 1.34 | 4.96  | 0.000193287 | 0.002229875 | suppressor of cytokine signaling 3                                                |
| ENSG00000146386 | 1.34 | 4.79  | 3.65544E-05 | 0.000573203 | ABRA C-terminal like                                                              |
| ENSG00000131586 | 1.34 | 6.61  | 6.16268E-08 | 2.52787E-06 | MRPL20                                                                            |
| ENSG00000171813 | 1.34 | 4.60  | 7.46108E-05 | 0.001029407 | PWWP domain containing 2B                                                         |
| ENSG00000111231 | 1.33 | 4.79  | 1.15767E-05 | 0.000213996 | GPN-loop GTPase 3                                                                 |
| ENSG00000136213 | 1.33 | 4.89  | 5.5654E-06  | 0.000117118 | carbohydrate (chondroitin 4) sulfotransferase 12                                  |
| ENSG00000105849 | 1.33 | 5.21  | 0.000499462 | 0.004707179 | TWIST neighbor                                                                    |
| ENSG00000228474 | 1.33 | 8.35  | 1.78934E-06 | 4.54226E-05 | oligosaccharyltransferase complex subunit 4 (non-catalytic)                       |
| ENSG00000125870 | 1.33 | 6.10  | 2.1506E-07  | 7.46986E-06 | small nuclear ribonucleoprotein polypeptide B                                     |
| ENSG00000171204 | 1.32 | 5.34  | 2.62428E-06 | 6.19506E-05 | transmembrane protein 126B                                                        |
| ENSG00000175727 | 1.32 | 6.01  | 1.59706E-06 | 4.13539E-05 | MLX interacting protein                                                           |
| ENSG00000138175 | 1.32 | 5.95  | 8.0701E-07  | 2.36448E-05 | ADP-ribosylation factor-like 3                                                    |
| ENSG00000134049 | 1.32 | 5.98  | 1.17202E-06 | 3.21522E-05 | immediate early response 3 interacting protein 1                                  |
| ENSG00000171848 | 1.32 | 5.94  | 1.75559E-05 | 0.000308626 | ribonucleotide reductase M2                                                       |
| ENSG00000105518 | 1.31 | 4.86  | 3.22292E-05 | 0.000512849 | transmembrane protein 205                                                         |
| ENSG00000172465 | 1.31 | 4.95  | 5.79338E-06 | 0.000121717 | transcription elongation factor A (SII)-like 1                                    |
| ENSG00000108010 | 1.31 | 6.67  | 1.52827E-07 | 5.5476E-06  | glutaredoxin 3                                                                    |
| ENSG00000272835 | 1.31 | 4.74  | 2.25643E-05 | 0.000383119 | single-pass membrane protein with aspartate-rich tail 1                           |
| ENSG00000162520 | 1.31 | 5.98  | 1.84558E-05 | 0.000322688 | syncoilin, intermediate filament protein                                          |
| ENSG00000136810 | 1.31 | 8.25  | 1.89512E-06 | 4.77327E-05 | thioredoxin                                                                       |
| ENSG00000206408 | 1.31 | 4.76  | 2.64993E-05 | 0.000434514 | G patch domain and ankyrin repeats 1                                              |
| ENSG00000118267 | 1.30 | 5.70  | 4.10488E-07 | 1.30317E-05 | ZNF271                                                                            |
| ENSG00000165502 | 1.30 | 7.82  | 1.00408E-06 | 2.80817E-05 | ribosomal protein L36a-like                                                       |
| ENSG00000111364 | 1.30 | 4.85  | 3.23588E-05 | 0.000514278 | DEAD (Asp-Glu-Ala-Asp) box polypeptide 55                                         |
| ENSG00000197019 | 1.30 | 5.04  | 5.92697E-06 | 0.00012412  | SERTA domain containing 1                                                         |
| ENSG00000167747 | 1.30 | 5.19  | 0.000163773 | 0.001961138 | chromosome 19 open reading frame 48                                               |
| ENSG00000173915 | 1.30 | 7.15  | 1.66721E-07 | 5.98398E-06 | up-regulated during skeletal muscle growth 5 homolog (mouse)                      |
| ENSG00000095066 | 1.30 | 5.04  | 9.42263E-05 | 0.001236381 | hook microtubule-tethering protein 2                                              |
| ENSG00000143106 | 1.30 | 7.52  | 1.30185E-06 | 3.50441E-05 | proteasome (prosome, macropain) subunit, alpha type, 5                            |
| ENSG00000172977 | 1.29 | 5.27  | 4.7277E-05  | 0.000711965 | K(lysine) acetyltransferase 5                                                     |
| ENSG00000105829 | 1.29 | 5.29  | 8.36333E-06 | 0.000163731 | Bet1 golgi vesicular membrane trafficking protein                                 |
| ENSG00000108175 | 1.29 | 5.67  | 0.000150716 | 0.001826828 | zinc finger, MIZ-type containing 1                                                |
| ENSG00000101132 | 1.29 | 4.65  | 4.40512E-05 | 0.000672001 | prefoldin subunit 4                                                               |
| ENSG00000172586 | 1.29 | 5.15  | 1.27998E-05 | 0.000234257 | coiled-coil-helix-coiled-coil-helix domain containing 1                           |
| ENSG00000165782 | 1.28 | 5.34  | 3.05345E-06 | 6.99532E-05 | transmembrane protein 55B                                                         |
| ENSG00000196507 | 1.28 | 6.74  | 1.4794E-07  | 5.43048E-06 | transcription elongation factor A (SII)-like 3                                    |
| ENSG00000070010 | 1.28 | 6.72  | 2.16854E-07 | 7.4919E-06  | ubiquitin fusion degradation 1 like (yeast)                                       |
| ENSG00000150551 | 1.28 | 7.45  | 1.68744E-06 | 4.32607E-05 | LY6/PLAUR domain containing 1                                                     |
| ENSG00000162300 | 1.28 | 5.48  | 6.90155E-06 | 0.000140877 | zinc finger protein-like 1                                                        |
| ENSG00000090266 | 1.28 | 7.35  | 3.63626E-07 | 1.17118E-05 | NADH dehydrogenase (ubiquinone) 1 beta subcomplex, 2, 8kDa                        |
| ENSG00000005075 | 1.28 | 6.09  | 2.72536E-07 | 9.14658E-06 | polymerase (RNA) II (DNA directed) polypeptide J, 13.3kDa                         |
| ENSG00000125691 | 1.27 | 9.99  | 0.000159684 | 0.001921116 | ribosomal protein L23                                                             |
| ENSG00000160049 | 1.27 | 6.48  | 9.47734E-07 | 2.67373E-05 | DNA fragmentation factor, 45kDa, alpha polypeptide                                |
| ENSG00000183527 | 1.27 | 5.40  | 3.3531E-06  | 7.50792E-05 | proteasome (prosome, macropain) assembly chaperone 1                              |
| ENSG00000168653 | 1.27 | 7.99  | 2.52091E-06 | 6.01722E-05 | NADH dehydrogenase (ubiquinone) Fe-S protein 5, 15kDa (NADH-coenzyme Q reductase) |
| ENSG00000137806 | 1.27 | 4.77  | 5.08802E-05 | 0.000754405 | NADH dehydrogenase (ubiquinone) complex I, assembly factor 1                      |
| ENSG00000134107 | 1.27 | 5.69  | 1.44715E-06 | 3.80827E-05 | basic helix-loop-helix family, member e40                                         |
| ENSG00000170791 | 1.27 | 5.59  | 1.72838E-06 | 4.42226E-05 | coiled-coil-helix-coiled-coil-helix domain containing 7                           |



|                 |      |      |             |             |                                                                                               |
|-----------------|------|------|-------------|-------------|-----------------------------------------------------------------------------------------------|
| ENSG00000101182 | 1.26 | 8.09 | 6.39302E-06 | 0.000132591 | proteasome (prosome, macropain) subunit, alpha type, 7                                        |
| ENSG00000115350 | 1.26 | 5.74 | 1.16838E-06 | 3.21204E-05 | polymerase (DNA-directed), epsilon 4, accessory subunit                                       |
| ENSG00000171202 | 1.26 | 4.97 | 2.51222E-05 | 0.000418305 | transmembrane protein 126A                                                                    |
| ENSG00000008988 | 1.26 | 9.54 | 7.86267E-05 | 0.001076203 | ribosomal protein S20                                                                         |
| ENSG00000148834 | 1.25 | 7.25 | 2.24529E-06 | 5.48014E-05 | glutathione S-transferase omega 1                                                             |
| ENSG00000164032 | 1.25 | 8.16 | 1.18195E-05 | 0.000217861 | H2A histone family, member Z                                                                  |
| ENSG00000261740 | 1.25 | 5.47 | 1.03892E-05 | 0.000195968 | Uncharacterized protein                                                                       |
| ENSG00000143387 | 1.25 | 4.89 | 0.001087326 | 0.008863936 | cathepsin K                                                                                   |
| ENSG00000117697 | 1.25 | 4.76 | 4.82438E-05 | 0.000723153 | NSL1, MIS12 kinetochore complex component                                                     |
| ENSG00000178951 | 1.24 | 6.07 | 2.20409E-06 | 5.41426E-05 | zinc finger and BTB domain containing 7A                                                      |
| ENSG00000102007 | 1.24 | 7.20 | 8.37147E-07 | 2.42919E-05 | proteolipid protein 2 (colonic epithelium-enriched)                                           |
| ENSG00000078668 | 1.23 | 6.93 | 7.95208E-07 | 2.35123E-05 | voltage-dependent anion channel 3                                                             |
| ENSG00000173163 | 1.23 | 5.22 | 2.02379E-05 | 0.000348688 | copper metabolism (Murr1) domain containing 1                                                 |
| ENSG00000106355 | 1.23 | 4.60 | 0.000111593 | 0.00143045  | LSM5 homolog, U6 small nuclear RNA and mRNA degradation associated                            |
| ENSG00000213551 | 1.23 | 4.97 | 0.00020179  | 0.00229241  | DnaJ (Hsp40) homolog, subfamily C, member 9                                                   |
| ENSG00000183291 | 1.23 | 7.82 | 4.12106E-06 | 9.04044E-05 | 15 kDa selenoprotein                                                                          |
| ENSG00000143198 | 1.23 | 6.65 | 1.61147E-06 | 4.16435E-05 | microsomal glutathione S-transferase 3                                                        |
| ENSG00000237765 | 1.23 | 5.17 | 2.36172E-05 | 0.0003989   | family with sequence similarity 200, member B                                                 |
| ENSG00000144681 | 1.22 | 4.73 | 0.000259792 | 0.002781089 | SH3 and cysteine rich domain                                                                  |
| ENSG00000135919 | 1.22 | 4.98 | 0.000341627 | 0.003464802 | serpin peptidase inhibitor, clade E (nexin, plasminogen activator inhibitor type 1), member 2 |
| ENSG00000090581 | 1.22 | 5.81 | 2.73335E-05 | 0.000444247 | N-acetylglucosamine-1-phosphate transferase, gamma subunit                                    |
| ENSG00000163814 | 1.22 | 6.85 | 8.65794E-05 | 0.001158066 | CUB domain containing protein 1                                                               |
| ENSG00000135047 | 1.22 | 6.10 | 1.47941E-05 | 0.000265861 | cathepsin L                                                                                   |
| ENSG00000213024 | 1.22 | 5.69 | 2.79642E-06 | 6.48593E-05 | nucleoporin 62kDa                                                                             |
| ENSG00000068697 | 1.21 | 8.97 | 2.73833E-05 | 0.000444498 | lysosomal protein transmembrane 4 alpha                                                       |
| ENSG00000154719 | 1.21 | 4.65 | 0.000144246 | 0.001776738 | mitochondrial ribosomal protein L39                                                           |
| ENSG00000148908 | 1.21 | 5.11 | 0.000691896 | 0.006152784 | regulator of G-protein signaling 10                                                           |
| ENSG00000125733 | 1.21 | 6.05 | 5.3926E-06  | 0.000114226 | thyroid hormone receptor interactor 10                                                        |
| ENSG00000078140 | 1.21 | 7.00 | 1.90267E-06 | 4.78296E-05 | ubiquitin-conjugating enzyme E2K                                                              |
| ENSG00000150779 | 1.21 | 6.15 | 3.31394E-06 | 7.4908E-05  | translocase of inner mitochondrial membrane 8 homolog B (yeast)                               |
| ENSG00000155115 | 1.21 | 6.25 | 6.987E-06   | 0.000142172 | general transcription factor IIIc, polypeptide 6, alpha 35kDa                                 |
| ENSG00000102103 | 1.21 | 6.07 | 1.29592E-06 | 3.50304E-05 | polyglutamine binding protein 1                                                               |
| ENSG00000216490 | 1.20 | 6.13 | 2.04341E-05 | 0.000350637 | interferon, gamma-inducible protein 30                                                        |
| ENSG00000206283 | 1.20 | 5.49 | 7.74813E-06 | 0.000154287 | prefoldin subunit 6                                                                           |
| ENSG00000179041 | 1.20 | 4.85 | 0.000148133 | 0.001806586 | ribosome biogenesis regulator homolog                                                         |
| ENSG00000103496 | 1.20 | 5.63 | 4.34966E-06 | 9.49357E-05 | syntaxin 4                                                                                    |
| ENSG00000165996 | 1.19 | 6.33 | 1.29474E-06 | 3.50304E-05 | 3-hydroxyacyl-CoA dehydratase 1                                                               |
| ENSG00000187514 | 1.19 | 8.96 | 0.000219463 | 0.002444548 | prothymosin, alpha                                                                            |
| ENSG00000104131 | 1.19 | 6.88 | 2.67552E-06 | 6.26274E-05 | eukaryotic translation initiation factor 3, subunit J                                         |
| ENSG00000088888 | 1.19 | 6.67 | 2.64671E-06 | 6.21784E-05 | mitochondrial antiviral signaling protein                                                     |
| ENSG00000133997 | 1.19 | 4.62 | 0.000133782 | 0.001663715 | mediator complex subunit 6                                                                    |
| ENSG00000144136 | 1.19 | 7.34 | 2.12643E-06 | 5.27363E-05 | solute carrier family 20 (phosphate transporter), member 1                                    |
| ENSG00000131876 | 1.19 | 5.99 | 1.05997E-05 | 0.000199357 | small nuclear ribonucleoprotein polypeptide A'                                                |
| ENSG00000256591 | 1.19 | 4.85 | 9.73087E-05 | 0.00127214  | Uncharacterized protein                                                                       |
| ENSG00000107404 | 1.19 | 6.76 | 1.48643E-06 | 3.8859E-05  | dishevelled segment polarity protein 1                                                        |
| ENSG00000103152 | 1.19 | 6.66 | 1.28132E-06 | 3.47813E-05 | N-methylpurine DNA glycosylase                                                                |
| ENSG00000120656 | 1.19 | 5.02 | 9.79199E-05 | 0.001275426 | TAF12 RNA polymerase II, TATA box binding protein (TBP)-associated factor, 20kDa              |
| ENSG00000136003 | 1.18 | 6.52 | 2.48407E-06 | 5.95486E-05 | iron-sulfur cluster assembly enzyme                                                           |
| ENSG00000273841 | 1.18 | 6.64 | 6.95854E-07 | 2.09583E-05 | TAF9 RNA polymerase II, TATA box binding protein (TBP)-associated factor, 32kDa               |
| ENSG00000111775 | 1.18 | 7.99 | 1.89255E-05 | 0.000329563 | cytochrome c oxidase subunit VIa polypeptide 1                                                |
| ENSG00000241343 | 1.18 | 6.26 | 0.000974002 | 0.008108941 | ribosomal protein L36a                                                                        |
| ENSG00000163644 | 1.18 | 5.22 | 2.50426E-05 | 0.000417516 | protein phosphatase, Mg <sup>2+</sup> /Mn <sup>2+</sup> dependent, 1K                         |
| ENSG00000182154 | 1.18 | 6.23 | 1.13518E-06 | 3.12742E-05 | mitochondrial ribosomal protein L41                                                           |
| ENSG00000090674 | 1.18 | 5.04 | 0.00013437  | 0.001667809 | mucoilin 1                                                                                    |
| ENSG00000147684 | 1.17 | 6.54 | 3.5051E-06  | 7.84911E-05 | NADH dehydrogenase (ubiquinone) 1 beta subcomplex, 9, 22kDa                                   |
| ENSG00000092020 | 1.17 | 4.86 | 0.000121496 | 0.001534552 | protein phosphatase 2, regulatory subunit B', gamma                                           |
| ENSG00000140307 | 1.17 | 6.16 | 1.46234E-06 | 3.84042E-05 | general transcription factor IIA, 2, 12kDa                                                    |
| ENSG00000161281 | 1.17 | 6.93 | 4.25299E-06 | 9.31404E-05 | cytochrome c oxidase subunit VIIa polypeptide 1 (muscle)                                      |
| ENSG00000176340 | 1.17 | 7.74 | 1.19709E-05 | 0.000220336 | cytochrome c oxidase subunit VIIIA (ubiquitous)                                               |
| ENSG00000155034 | 1.16 | 5.05 | 4.99489E-05 | 0.000742682 | F-box and leucine-rich repeat protein 18                                                      |
| ENSG00000278259 | 1.16 | 5.64 | 1.63151E-05 | 0.000289173 | myosin XIX                                                                                    |
| ENSG00000131732 | 1.16 | 4.68 | 0.00015431  | 0.001866585 | zinc finger, CCHC domain containing 9                                                         |
| ENSG00000204138 | 1.16 | 5.85 | 5.28934E-06 | 0.000112407 | phosphatase and actin regulator 4                                                             |
| ENSG00000131462 | 1.16 | 6.86 | 7.57797E-06 | 0.000151806 | tubulin, gamma 1                                                                              |
| ENSG00000228907 | 1.15 | 5.98 | 4.07971E-06 | 8.98022E-05 | ring finger protein 5, E3 ubiquitin protein ligase                                            |
| ENSG00000196683 | 1.15 | 7.33 | 5.41225E-06 | 0.000114454 | translocase of outer mitochondrial membrane 7 homolog (yeast)                                 |
| ENSG00000143553 | 1.15 | 5.52 | 1.38515E-05 | 0.000250666 | SNAP-associated protein                                                                       |

|                 |      |      |             |             |                                                                                          |
|-----------------|------|------|-------------|-------------|------------------------------------------------------------------------------------------|
| ENSG00000213626 | 1.15 | 8.82 | 0.001004649 | 0.008315866 | limb bud and heart development                                                           |
| ENSG00000171621 | 1.15 | 4.60 | 0.000266322 | 0.002839233 | splA/ryanodine receptor domain and SOCS box containing 1                                 |
| ENSG00000126653 | 1.15 | 5.55 | 1.52934E-05 | 0.000273314 | nuclear speckle splicing regulatory protein 1                                            |
| ENSG00000177889 | 1.15 | 7.07 | 1.00871E-05 | 0.000192235 | ubiquitin-conjugating enzyme E2N                                                         |
| ENSG00000132646 | 1.15 | 6.18 | 4.34857E-06 | 9.49357E-05 | proliferating cell nuclear antigen                                                       |
| ENSG00000159199 | 1.15 | 6.35 | 2.7477E-06  | 6.40849E-05 | ATP synthase, H+ transporting, mitochondrial Fo complex, subunit C1 (subunit 9)          |
| ENSG00000128708 | 1.14 | 5.60 | 0.000127738 | 0.001597781 | histone acetyltransferase 1                                                              |
| ENSG00000162961 | 1.14 | 6.57 | 1.44075E-06 | 3.79917E-05 | dpy-30 histone methyltransferase complex regulatory subunit                              |
| ENSG00000275342 | 1.14 | 5.03 | 0.00027106  | 0.002875508 | Tyrosine-protein kinase Sgk223                                                           |
| ENSG00000157895 | 1.14 | 4.75 | 0.000198937 | 0.002276766 | chromosome 12 open reading frame 43                                                      |
| ENSG00000118503 | 1.14 | 4.72 | 0.000241954 | 0.002644908 | tumor necrosis factor, alpha-induced protein 3                                           |
| ENSG00000169062 | 1.14 | 6.03 | 0.000372337 | 0.003710115 | UPF3 regulator of nonsense transcripts homolog A (yeast)                                 |
| ENSG00000105379 | 1.14 | 6.66 | 3.42799E-06 | 7.68976E-05 | electron-transfer-flavoprotein, beta polypeptide                                         |
| ENSG00000275145 | 1.14 | 5.52 | 3.34141E-05 | 0.000527159 | FSHD region gene 1                                                                       |
| ENSG00000163281 | 1.14 | 4.92 | 0.000163396 | 0.001960298 | glucosamine-6-phosphate deaminase 2                                                      |
| ENSG00000143314 | 1.14 | 5.62 | 5.45907E-05 | 0.000801553 | mitochondrial ribosomal protein L24                                                      |
| ENSG00000127184 | 1.14 | 8.06 | 3.14242E-05 | 0.000502515 | cytochrome c oxidase subunit VIIc                                                        |
| ENSG00000165264 | 1.14 | 5.82 | 2.68743E-05 | 0.000440104 | NADH dehydrogenase (ubiquinone) 1 beta subcomplex, 6, 17kDa                              |
| ENSG00000162222 | 1.13 | 4.77 | 0.000237785 | 0.002610377 | tetratricopeptide repeat domain 9C                                                       |
| ENSG00000277359 | 1.13 | 9.35 | 0.000803225 | 0.006914374 | 40S ribosomal protein S9; Ribosomal protein S9, isoform CRA_c                            |
| ENSG00000105755 | 1.13 | 5.42 | 0.000163836 | 0.001961138 | ethylmalonic encephalopathy 1                                                            |
| ENSG00000168734 | 1.13 | 5.76 | 0.001111501 | 0.009004207 | protein kinase (cAMP-dependent, catalytic) inhibitor gamma                               |
| ENSG00000136238 | 1.13 | 8.83 | 0.000186826 | 0.002176719 | ras-related C3 botulinum toxin substrate 1 (rho family, small GTP binding protein Rac1)  |
| ENSG00000105364 | 1.12 | 6.24 | 1.8631E-05  | 0.000325094 | mitochondrial ribosomal protein L4                                                       |
| ENSG00000159079 | 1.12 | 5.16 | 0.000146129 | 0.001793095 | chromosome 21 open reading frame 59                                                      |
| ENSG00000105202 | 1.12 | 6.14 | 5.37223E-05 | 0.000791501 | fibrillarin                                                                              |
| ENSG00000136942 | 1.12 | 9.13 | 0.00039462  | 0.003883389 | ribosomal protein L35                                                                    |
| ENSG00000125835 | 1.12 | 7.58 | 2.02967E-05 | 0.000349206 | small nuclear ribonucleoprotein polypeptides B and B1                                    |
| ENSG00000104522 | 1.12 | 6.75 | 8.66759E-06 | 0.000168666 | tissue specific transplantation antigen P35B                                             |
| ENSG00000198840 | 1.12 | 8.66 | 0.000137289 | 0.001700783 | mitochondrially encoded NADH dehydrogenase 3                                             |
| ENSG00000185222 | 1.11 | 7.09 | 1.00523E-05 | 0.000191855 | VW domain binding protein 5                                                              |
| ENSG00000177606 | 1.11 | 7.22 | 1.1013E-05  | 0.000205338 | jun proto-oncogene                                                                       |
| ENSG00000147533 | 1.11 | 5.96 | 7.74956E-06 | 0.000154287 | golgin A7                                                                                |
| ENSG00000100632 | 1.11 | 6.86 | 1.30715E-05 | 0.000238554 | enhancer of rudimentary homolog (Drosophila)                                             |
| ENSG00000132581 | 1.11 | 6.16 | 7.18836E-06 | 0.000145353 | stromal cell-derived factor 2                                                            |
| ENSG00000094804 | 1.11 | 4.63 | 0.000717447 | 0.006313032 | cell division cycle 6                                                                    |
| ENSG00000104915 | 1.11 | 5.77 | 2.0201E-05  | 0.000348688 | syntaxin 10                                                                              |
| ENSG00000188643 | 1.11 | 8.21 | 4.38503E-05 | 0.000671315 | S100 calcium binding protein A16                                                         |
| ENSG00000130766 | 1.11 | 5.06 | 0.000125293 | 0.001573281 | sestrin 2                                                                                |
| ENSG00000113068 | 1.11 | 6.05 | 8.40208E-05 | 0.001134412 | prefoldin subunit 1                                                                      |
| ENSG00000173141 | 1.10 | 5.25 | 0.000213433 | 0.002385614 | mitochondrial ribosomal protein L57                                                      |
| ENSG00000054148 | 1.10 | 6.98 | 3.41858E-05 | 0.00053802  | phosphohistidine phosphatase 1                                                           |
| ENSG00000147996 | 1.10 | 4.68 | 0.001116688 | 0.009034893 | COBW domain containing 5                                                                 |
| ENSG00000168172 | 1.10 | 6.45 | 1.01115E-05 | 0.000192417 | hook microtubule-tethering protein 3                                                     |
| ENSG00000083457 | 1.10 | 4.68 | 0.00079959  | 0.006892262 | integrin, alpha E (antigen CD103, human mucosal lymphocyte antigen 1; alpha polypeptide) |
| ENSG00000117280 | 1.10 | 5.15 | 0.000169601 | 0.00201232  | RAB29, member RAS oncogene family                                                        |
| ENSG00000157613 | 1.10 | 5.48 | 3.01179E-05 | 0.000482821 | cAMP responsive element binding protein 3-like 1                                         |
| ENSG00000174021 | 1.10 | 6.24 | 6.70503E-06 | 0.000137894 | guanine nucleotide binding protein (G protein), gamma 5                                  |
| ENSG00000133641 | 1.10 | 4.66 | 0.000619792 | 0.005623833 | chromosome 12 open reading frame 29                                                      |
| ENSG00000118181 | 1.10 | 8.99 | 0.000290765 | 0.003044546 | ribosomal protein S25                                                                    |
| ENSG00000186918 | 1.09 | 5.01 | 0.001228219 | 0.009706312 | zinc finger protein 395                                                                  |
| ENSG00000101843 | 1.09 | 6.10 | 7.08196E-06 | 0.000143877 | proteasome (prosome, macropain) 26S subunit, non-ATPase, 10                              |
| ENSG00000138785 | 1.09 | 5.08 | 0.000194547 | 0.002239756 | integrator complex subunit 12                                                            |
| ENSG00000008513 | 1.09 | 5.73 | 6.49076E-05 | 0.000920605 | ST3 beta-galactoside alpha-2,3-sialyltransferase 1                                       |
| ENSG00000122026 | 1.09 | 8.72 | 0.000288144 | 0.003031048 | ribosomal protein L21                                                                    |
| ENSG00000123374 | 1.09 | 5.23 | 0.000146336 | 0.001793549 | cyclin-dependent kinase 2                                                                |
| ENSG00000175334 | 1.09 | 6.91 | 6.92523E-05 | 0.000968992 | barrier to autointegration factor 1                                                      |
| ENSG00000099977 | 1.09 | 5.97 | 8.71092E-05 | 0.001160797 | D-dopachrome tautomerase                                                                 |
| ENSG00000104979 | 1.09 | 6.71 | 1.32011E-05 | 0.00024058  | chromosome 19 open reading frame 53                                                      |
| ENSG00000070423 | 1.09 | 5.87 | 0.000265249 | 0.002830125 | ring finger protein 126                                                                  |
| ENSG00000147586 | 1.08 | 4.80 | 0.00041039  | 0.003986952 | mitochondrial ribosomal protein S28                                                      |
| ENSG00000186283 | 1.08 | 4.92 | 0.000304117 | 0.003146784 | torsin family 3, member A                                                                |
| ENSG00000162783 | 1.08 | 5.98 | 5.55531E-05 | 0.00081342  | immediate early response 5                                                               |
| ENSG00000123136 | 1.08 | 5.75 | 2.37969E-05 | 0.000400364 | DEAD (Asp-Glu-Ala-Asp) box polypeptide 39A                                               |
| ENSG00000162407 | 1.08 | 6.06 | 0.000100798 | 0.001310274 | phosphatidic acid phosphatase type 2B                                                    |
| ENSG00000160201 | 1.08 | 6.42 | 1.33191E-05 | 0.000242388 | U2 small nuclear RNA auxiliary factor 1                                                  |
| ENSG00000257727 | 1.08 | 6.38 | 5.01542E-06 | 0.00010747  | canopy FGF signaling regulator 2                                                         |

|                 |      |      |             |             |                                                                                   |
|-----------------|------|------|-------------|-------------|-----------------------------------------------------------------------------------|
| ENSG00000136868 | 1.08 | 5.36 | 0.000165858 | 0.001973347 | solute carrier family 31 (copper transporter), member 1                           |
| ENSG00000138495 | 1.08 | 5.09 | 0.000476244 | 0.004518019 | COX17 cytochrome c oxidase copper chaperone                                       |
| ENSG00000166595 | 1.08 | 6.13 | 8.71429E-05 | 0.001160797 | family with sequence similarity 96, member B                                      |
| ENSG00000100442 | 1.07 | 6.31 | 1.02885E-05 | 0.000194637 | FK506 binding protein 3, 25kDa                                                    |
| ENSG00000182117 | 1.07 | 7.32 | 5.52683E-05 | 0.000810581 | NOP10 ribonucleoprotein                                                           |
| ENSG00000185022 | 1.07 | 5.74 | 0.000237692 | 0.002610377 | v-maf avian musculoaponeurotic fibrosarcoma oncogene homolog F                    |
| ENSG00000156467 | 1.07 | 8.00 | 0.000106354 | 0.001370012 | ubiquinol-cytochrome c reductase binding protein                                  |
| ENSG00000048162 | 1.07 | 4.99 | 0.000398735 | 0.003911959 | NOP16 nucleolar protein                                                           |
| ENSG00000115446 | 1.07 | 4.76 | 0.001168549 | 0.009340217 | unc-50 homolog (C. elegans)                                                       |
| ENSG00000171421 | 1.06 | 5.15 | 0.000146443 | 0.001793549 | mitochondrial ribosomal protein L36                                               |
| ENSG00000188612 | 1.06 | 7.41 | 4.39299E-05 | 0.000671737 | small ubiquitin-like modifier 2                                                   |
| ENSG00000157881 | 1.06 | 5.04 | 0.000289145 | 0.003031048 | pantothenate kinase 4                                                             |
| ENSG00000131495 | 1.06 | 5.74 | 7.75759E-05 | 0.001065205 | NADH dehydrogenase (ubiquinone) 1 alpha subcomplex, 2, 8kDa                       |
| ENSG00000152684 | 1.06 | 5.01 | 0.001168882 | 0.009340217 | pelota homolog (Drosophila)                                                       |
| ENSG00000118363 | 1.06 | 6.54 | 4.38345E-05 | 0.000671315 | signal peptidase complex subunit 2                                                |
| ENSG00000113460 | 1.05 | 4.59 | 0.001013165 | 0.00836492  | BRX1, biogenesis of ribosomes                                                     |
| ENSG00000167641 | 1.05 | 8.47 | 0.000158218 | 0.001907033 | protein phosphatase 1, regulatory (inhibitor) subunit 14A                         |
| ENSG00000124226 | 1.05 | 6.52 | 5.0277E-05  | 0.0007467   | ring finger protein 114                                                           |
| ENSG00000213619 | 1.05 | 6.22 | 3.55191E-05 | 0.000557645 | NADH dehydrogenase (ubiquinone) Fe-S protein 3, 30kDa (NADH-coenzyme Q reductase) |
| ENSG00000101363 | 1.05 | 6.20 | 0.000101824 | 0.001318308 | mannosidase, beta A, lysosomal-like                                               |
| ENSG00000189060 | 1.05 | 7.32 | 4.32109E-05 | 0.000664677 | H1 histone family, member 0                                                       |
| ENSG00000128463 | 1.05 | 6.59 | 1.09516E-05 | 0.000204772 | ER membrane protein complex subunit 4                                             |
| ENSG00000010165 | 1.05 | 5.21 | 0.000242532 | 0.002648991 | methyltransferase like 13                                                         |
| ENSG00000173465 | 1.05 | 5.92 | 2.59544E-05 | 0.000428298 | Sjogren syndrome/scleroderma autoantigen 1                                        |
| ENSG00000117395 | 1.04 | 7.05 | 4.38069E-05 | 0.000671315 | EBNA1 binding protein 2                                                           |
| ENSG00000160888 | 1.04 | 6.25 | 6.71789E-05 | 0.000946585 | immediate early response 2                                                        |
| ENSG00000141560 | 1.04 | 5.20 | 0.000601949 | 0.005499985 | fructosamine 3 kinase related protein                                             |
| ENSG00000160991 | 1.04 | 6.67 | 0.000173074 | 0.002045658 | ORAI calcium release-activated calcium modulator 2                                |
| ENSG00000185651 | 1.04 | 7.53 | 4.77656E-05 | 0.000717078 | ubiquitin-conjugating enzyme E2L 3                                                |
| ENSG00000115539 | 1.03 | 5.22 | 0.000255675 | 0.002750687 | phosducin-like 3                                                                  |
| ENSG00000122952 | 1.03 | 4.95 | 0.001198924 | 0.009538977 | ZW10 interacting kinetochore protein                                              |
| ENSG00000128609 | 1.03 | 5.63 | 9.29134E-05 | 0.001223786 | NADH dehydrogenase (ubiquinone) 1 alpha subcomplex, 5                             |
| ENSG00000167283 | 1.02 | 7.21 | 0.000143356 | 0.001767464 | ATP synthase, H+ transporting, mitochondrial Fo complex, subunit G                |
| ENSG00000112715 | 1.02 | 6.90 | 9.05287E-05 | 0.001197259 | vascular endothelial growth factor A                                              |
| ENSG00000118292 | 1.02 | 5.31 | 0.000336838 | 0.003424302 | chromosome 1 open reading frame 54                                                |
| ENSG00000237403 | 1.02 | 6.15 | 6.63855E-05 | 0.00093745  | protein phosphatase 1, regulatory (inhibitor) subunit 11                          |
| ENSG00000183520 | 1.02 | 5.37 | 0.000299869 | 0.003110299 | UTP11-like, U3 small nucleolar ribonucleoprotein (yeast)                          |
| ENSG00000116750 | 1.02 | 5.00 | 0.001277117 | 0.009988883 | ubiquitin carboxyl-terminal hydrolase L5                                          |
| ENSG00000146574 | 1.02 | 5.99 | 5.41239E-05 | 0.000796509 | CCZ1 homolog B, vacuolar protein trafficking and biogenesis associated            |
| ENSG00000183011 | 1.01 | 5.44 | 0.000224601 | 0.002488911 | N(alpha)-acetyltransferase 38, NatC auxiliary subunit                             |
| ENSG00000232112 | 1.01 | 7.08 | 9.6769E-05  | 0.001266821 | translation machinery associated 7 homolog (S. cerevisiae)                        |
| ENSG00000112096 | 1.01 | 6.79 | 0.000357509 | 0.003580908 | superoxide dismutase 2, mitochondrial                                             |

**Supplementary Table S7A: Differential expression analysis of *T. gondii* genes from neuronal stem cells infected with *T. gondii* EGS strain for 18 hours compared to *T. gondii* gene expression from neuronal stem cells infected with GT1 strain for 18 hours.**

| gene ID       | logFC (EGS/GT1) | logCPM | PValue   | FDR      | Product Name                                       |
|---------------|-----------------|--------|----------|----------|----------------------------------------------------|
| TGME49_233925 | 6.94            | 7.83   | 7.51E-96 | 5.55E-92 | hypothetical protein                               |
| TGME49_237130 | 7.84            | 10.26  | 2.61E-88 | 9.64E-85 | cytochrome b, putative                             |
| TGME49_320050 | 4.19            | 13.43  | 2.62E-77 | 6.45E-74 | ribosomal protein RPL5                             |
| TGME49_322200 | 12.41           | 6.70   | 8.07E-75 | 1.49E-71 | apocytochrome b, putative                          |
| TGME49_330000 | 8.50            | 10.23  | 4.67E-72 | 6.91E-69 | cytochrome b                                       |
| TGME49_290600 | 3.14            | 9.11   | 1.20E-63 | 1.47E-60 | succinyl-CoA-synthetase alpha SCSA                 |
| TGME49_323400 | 7.83            | 9.06   | 2.63E-61 | 2.78E-58 | cytochrome c oxidase subunit iii subfamily protein |
| TGME49_322800 | 12.26           | 6.48   | 2.09E-53 | 1.93E-50 | hypothetical protein                               |
| TGME49_301250 | 7.82            | 14.41  | 3.45E-49 | 2.83E-46 | hypothetical protein                               |
| TGME49_255060 | 7.95            | 9.95   | 2.43E-47 | 1.79E-44 | cytochrome b(N-terminal)/b6/petB subfamily protein |
| TGME49_321360 | 3.31            | 8.21   | 6.33E-47 | 4.26E-44 | clustered-asparagine-rich protein                  |
| TGME49_232955 | 11.47           | 12.33  | 5.85E-42 | 3.61E-39 | hypothetical protein                               |
| TGME49_302055 | 11.93           | 5.97   | 1.32E-39 | 7.52E-37 | ribosomal protein RPS12                            |
| TGME49_251180 | 4.23            | 6.80   | 2.16E-37 | 1.14E-34 | KRUF family protein                                |
| TGME49_262690 | 1.96            | 10.98  | 4.59E-36 | 2.26E-33 | ribosomal protein RPL27                            |
| TGME49_261240 | 7.55            | 5.02   | 1.21E-33 | 5.61E-31 | histone H3                                         |
| TGME49_238240 | 2.08            | 8.97   | 1.49E-31 | 6.48E-29 | bystin protein                                     |
| TGME49_250710 | 2.10            | 11.27  | 5.46E-31 | 2.24E-28 | microneme protein MIC10                            |
| TGME49_244370 | 3.57            | 8.80   | 6.24E-29 | 2.43E-26 | TDC1, putative                                     |
| TGME49_213280 | 2.15            | 8.91   | 2.56E-28 | 9.47E-26 | SAG-related sequence SRS25                         |
| TGME49_218520 | 1.84            | 10.33  | 1.27E-27 | 4.46E-25 | microneme protein MIC6                             |
| TGME49_217530 | 4.13            | 6.35   | 1.80E-27 | 6.05E-25 | hypothetical protein                               |
| TGME49_211695 | 4.77            | 5.62   | 7.56E-26 | 2.43E-23 | hypothetical protein                               |
| TGME49_287040 | 3.80            | 7.04   | 8.71E-26 | 2.68E-23 | hypothetical protein                               |
| TGME49_277230 | 3.85            | 5.63   | 1.20E-25 | 3.54E-23 | hypothetical protein                               |
| TGME49_311230 | 1.78            | 9.99   | 2.24E-25 | 6.36E-23 | hypothetical protein                               |
| TGME49_237230 | 1.90            | 9.81   | 4.15E-24 | 1.14E-21 | hypothetical protein                               |
| TGME49_223660 | 3.08            | 7.34   | 4.92E-24 | 1.30E-21 | 50S ribosomal protein L4, putative                 |
| TGME49_293790 | 4.56            | 6.72   | 2.61E-23 | 6.65E-21 | hypothetical protein                               |
| TGME49_293170 | -5.98           | 7.60   | 3.54E-23 | 8.73E-21 | hypothetical protein                               |
| TGME49_205680 | 3.65            | 8.42   | 4.09E-23 | 9.75E-21 | hypothetical protein                               |
| TGME49_271935 | 2.89            | 6.69   | 4.96E-22 | 1.14E-19 | hypothetical protein                               |
| TGME49_254710 | 2.29            | 7.81   | 5.10E-22 | 1.14E-19 | serine esterase (DUF676) protein                   |
| TGME49_275860 | 2.82            | 9.46   | 7.11E-22 | 1.55E-19 | hypothetical protein                               |
| TGME49_253690 | 1.70            | 8.98   | 6.35E-21 | 1.34E-18 | hypothetical protein                               |
| TGME49_221840 | 4.60            | 4.71   | 7.31E-21 | 1.46E-18 | hypothetical protein                               |
| TGME49_251400 | 3.32            | 6.13   | 7.29E-21 | 1.46E-18 | hypothetical protein                               |
| TGME49_240060 | 2.01            | 9.24   | 8.06E-21 | 1.57E-18 | hypothetical protein                               |
| TGME49_224760 | 6.80            | 4.85   | 1.53E-20 | 2.90E-18 | SAG-related sequence SRS40E                        |
| TGME49_236910 | -4.99           | 7.47   | 2.39E-20 | 4.41E-18 | U2 snRNP auxiliary factor, putative                |
| TGME49_243615 | 4.37            | 5.68   | 2.85E-20 | 5.14E-18 | hypothetical protein                               |
| TGME49_225790 | 2.95            | 7.33   | 7.51E-20 | 1.32E-17 | PDI family protein                                 |
| TGME49_277080 | 1.51            | 10.55  | 1.16E-19 | 2.00E-17 | microneme protein MIC5                             |
| TGME49_211030 | -3.57           | 8.15   | 1.31E-19 | 2.21E-17 | hypothetical protein                               |

|               |        |       |          |          |                                                   |
|---------------|--------|-------|----------|----------|---------------------------------------------------|
| TGME49_259260 | -2.69  | 9.01  | 1.40E-19 | 2.31E-17 | membrane protein FtsH1                            |
| TGME49_261720 | -5.75  | 7.82  | 1.64E-19 | 2.63E-17 | metal cation transporter, ZIP family protein      |
| TGME49_229010 | -2.20  | 9.17  | 3.22E-19 | 5.06E-17 | rhopty neck protein RON4                          |
| TGME49_273320 | 2.17   | 7.86  | 5.07E-19 | 7.80E-17 | hypothetical protein                              |
| TGME49_233450 | 1.96   | 8.00  | 1.80E-18 | 2.72E-16 | SAG-related sequence SRS29A                       |
| TGME49_239790 | -10.72 | 7.09  | 1.85E-18 | 2.74E-16 | BRCA1 C Terminus (BRCT) domain-containing prot    |
| TGME49_275640 | 2.47   | 6.94  | 3.72E-18 | 5.40E-16 | hypothetical protein                              |
| TGME49_290020 | 2.52   | 6.64  | 1.61E-17 | 2.29E-15 | cyclin dependent kinase binding protein           |
| TGME49_287170 | -10.73 | 7.07  | 1.91E-17 | 2.67E-15 | hypothetical protein                              |
| TGME49_269330 | -10.62 | 7.07  | 2.34E-17 | 3.20E-15 | hypothetical protein                              |
| TGME49_208370 | 1.60   | 8.84  | 3.37E-17 | 4.53E-15 | myosin heavy chain, putative                      |
| TGME49_275870 | 4.13   | 5.59  | 4.81E-17 | 6.35E-15 | tubulin/FtsZ family, GTPase domain-containing pro |
| TGME49_260430 | 5.02   | 4.67  | 7.97E-17 | 1.03E-14 | hypothetical protein                              |
| TGME49_270700 | 2.17   | 7.08  | 1.44E-16 | 1.84E-14 | hypothetical protein                              |
| TGME49_312140 | -3.17  | 8.29  | 2.50E-16 | 3.13E-14 | hypothetical protein                              |
| TGME49_228160 | 1.95   | 7.19  | 2.70E-16 | 3.33E-14 | acid phosphatase                                  |
| TGME49_214980 | 1.71   | 8.41  | 2.76E-16 | 3.35E-14 | hypothetical protein                              |
| TGME49_201170 | -2.54  | 8.67  | 3.01E-16 | 3.59E-14 | hypothetical protein                              |
| TGME49_301222 | 3.12   | 6.56  | 3.44E-16 | 4.03E-14 | DNA repair protein Rad4 domain-containing prote   |
| TGME49_252430 | 1.96   | 8.12  | 3.96E-16 | 4.57E-14 | hypothetical protein                              |
| TGME49_290700 | 2.40   | 7.93  | 4.29E-16 | 4.88E-14 | hypothetical protein                              |
| TGME49_226310 | -4.12  | 7.74  | 5.29E-16 | 5.93E-14 | zinc finger (CCCH type) motif-containing protein  |
| TGME49_251540 | 1.84   | 9.03  | 6.26E-16 | 6.91E-14 | dense granule protein GRA9                        |
| TGME49_293570 | -3.09  | 7.85  | 6.50E-16 | 7.07E-14 | translocation protein sec62, putative             |
| TGME49_290200 | -2.13  | 8.88  | 1.37E-15 | 1.47E-13 | NAD/NADP octopine/nopaline dehydrogenase, alp     |
| TGME49_261520 | -5.37  | 7.04  | 1.59E-15 | 1.68E-13 | nucleolar GTP-binding protein 1, putative         |
| TGME49_306670 | -3.53  | 7.92  | 1.64E-15 | 1.71E-13 | hypothetical protein                              |
| TGME49_249990 | 2.26   | 10.24 | 1.73E-15 | 1.77E-13 | hypothetical protein                              |
| TGME49_208450 | 1.90   | 8.60  | 2.16E-15 | 2.15E-13 | protease inhibitor PI2                            |
| TGME49_214220 | 1.64   | 9.74  | 2.14E-15 | 2.15E-13 | hypothetical protein                              |
| TGME49_315885 | 2.12   | 7.08  | 2.42E-15 | 2.39E-13 | glycosyltransferase, putative                     |
| TGME49_254620 | 1.38   | 9.19  | 2.76E-15 | 2.69E-13 | ribosomal protein RPL39                           |
| TGME49_219520 | -2.77  | 7.68  | 3.35E-15 | 3.22E-13 | histone arginine methyltransferase PRMT1          |
| TGME49_269310 | 4.41   | 4.71  | 4.15E-15 | 3.94E-13 | hypothetical protein                              |
| TGME49_239440 | -10.43 | 6.88  | 4.35E-15 | 4.07E-13 | protein kinase (incomplete catalytic triad)       |
| TGME49_254120 | 2.06   | 8.30  | 6.90E-15 | 6.38E-13 | autophagy-related protein 8 atg8, putative        |
| TGME49_214350 | -3.27  | 7.39  | 7.25E-15 | 6.62E-13 | GTP-binding protein, putative                     |
| TGME49_206550 | 5.36   | 6.05  | 9.88E-15 | 8.91E-13 | hypothetical protein                              |
| TGME49_245980 | 4.18   | 7.53  | 1.10E-14 | 9.81E-13 | hypothetical protein                              |
| TGME49_222380 | -2.54  | 8.13  | 1.33E-14 | 1.17E-12 | importin-beta N-terminal domain-containing prote  |
| TGME49_314500 | -2.83  | 8.36  | 1.74E-14 | 1.51E-12 | subtilisin SUB2                                   |
| TGME49_266050 | 1.90   | 7.09  | 1.93E-14 | 1.66E-12 | hypothetical protein                              |
| TGME49_223930 | 1.66   | 8.26  | 2.05E-14 | 1.74E-12 | RNA recognition motif-containing protein          |
| TGME49_319500 | -10.40 | 7.06  | 2.67E-14 | 2.21E-12 | hypothetical protein                              |
| TGME49_217820 | -2.95  | 7.71  | 2.86E-14 | 2.35E-12 | PCI domain-containing protein                     |
| TGME49_298620 | -5.25  | 6.83  | 3.21E-14 | 2.61E-12 | hypothetical protein                              |
| TGME49_265190 | -4.42  | 7.20  | 3.62E-14 | 2.91E-12 | Ulp1 protease family, C-terminal catalytic domain |
| TGME49_245460 | 1.32   | 10.31 | 3.84E-14 | 3.05E-12 | ribosomal protein RPS8                            |
| TGME49_315620 | -5.25  | 7.07  | 4.12E-14 | 3.24E-12 | vacuolar ATP synthase subunit C, putative         |
| TGME49_282070 | -2.08  | 8.54  | 4.34E-14 | 3.38E-12 | hypothetical protein                              |
| TGME49_300220 | -3.34  | 7.60  | 4.42E-14 | 3.40E-12 | hypothetical protein                              |
| TGME49_240650 | -2.32  | 8.44  | 4.99E-14 | 3.80E-12 | coatomer protein complex, subunit alpha, putativ  |
| TGME49_292920 | -2.40  | 7.96  | 7.17E-14 | 5.41E-12 | heat shock protein 75, putative                   |
| TGME49_260500 | -2.03  | 9.04  | 7.31E-14 | 5.46E-12 | COPI associated protein, putative                 |

|               |        |       |          |          |                                                  |
|---------------|--------|-------|----------|----------|--------------------------------------------------|
| TGME49_277000 | -4.45  | 7.32  | 8.80E-14 | 6.51E-12 | transport protein Sec24, putative                |
| TGME49_305160 | 3.42   | 4.99  | 9.45E-14 | 6.92E-12 | histone H2Ba                                     |
| TGME49_278870 | -1.83  | 8.87  | 1.20E-13 | 8.71E-12 | myosin F                                         |
| TGME49_212880 | -2.79  | 7.91  | 1.43E-13 | 1.03E-11 | surface antigen repeat-containing protein        |
| TGME49_220930 | -3.07  | 7.43  | 1.45E-13 | 1.03E-11 | hypothetical protein                             |
| TGME49_250340 | -2.65  | 7.79  | 1.48E-13 | 1.04E-11 | centrin 2                                        |
| TGME49_287460 | 3.46   | 4.88  | 1.79E-13 | 1.25E-11 | hypothetical protein                             |
| TGME49_209050 | -10.21 | 6.78  | 1.93E-13 | 1.34E-11 | Tyrosine kinase-like (TKL) protein               |
| TGME49_261022 | -2.70  | 7.63  | 2.24E-13 | 1.53E-11 | dynein heavy chain family protein                |
| TGME49_253170 | 1.86   | 7.37  | 2.27E-13 | 1.54E-11 | zinc carboxypeptidase, putative                  |
| TGME49_238895 | -3.36  | 7.20  | 2.62E-13 | 1.76E-11 | hypothetical protein                             |
| TGME49_259240 | 1.55   | 9.56  | 2.68E-13 | 1.79E-11 | ribosomal protein RPS21                          |
| TGME49_200300 | 6.27   | 4.83  | 2.79E-13 | 1.84E-11 | hypothetical protein                             |
| TGME49_239260 | 6.69   | 4.79  | 4.13E-13 | 2.68E-11 | histone H4                                       |
| TGME49_228690 | -5.20  | 7.16  | 4.14E-13 | 2.68E-11 | phosphatidylinositol 3- and 4-kinase             |
| TGME49_321530 | 1.55   | 8.75  | 4.34E-13 | 2.74E-11 | cathepsin CPL                                    |
| TGME49_244280 | -1.60  | 10.21 | 4.32E-13 | 2.74E-11 | hypothetical protein                             |
| TGME49_247530 | 3.32   | 8.95  | 4.50E-13 | 2.82E-11 | hypothetical protein                             |
| TGME49_263870 | -5.18  | 6.97  | 4.63E-13 | 2.88E-11 | glutamate-tRNA ligase                            |
| TGME49_270360 | -5.16  | 7.03  | 5.71E-13 | 3.52E-11 | hypothetical protein                             |
| TGME49_257910 | 4.73   | 5.98  | 6.05E-13 | 3.69E-11 | hypothetical protein                             |
| TGME49_251740 | -3.48  | 7.43  | 6.35E-13 | 3.85E-11 | AP2 domain transcription factor AP2XII-9         |
| TGME49_240280 | -2.57  | 7.78  | 7.03E-13 | 4.23E-11 | S1/P1nuclease                                    |
| TGME49_210300 | -5.16  | 6.98  | 7.30E-13 | 4.35E-11 | hypothetical protein                             |
| TGME49_249350 | -10.14 | 6.75  | 7.38E-13 | 4.36E-11 | esterase/lipase/thioesterase domain-containing p |
| TGME49_242290 | -2.55  | 7.99  | 7.94E-13 | 4.66E-11 | proteasome subunit alpha1, putative              |
| TGME49_286120 | -2.44  | 8.02  | 8.41E-13 | 4.89E-11 | prolyl endopeptidase                             |
| TGME49_244880 | -4.25  | 6.91  | 9.16E-13 | 5.29E-11 | DNA-directed RNA polymerase I RPA1               |
| TGME49_294820 | 2.77   | 7.93  | 1.41E-12 | 8.05E-11 | type I fatty acid synthase, putative             |
| TGME49_289710 | -2.76  | 7.42  | 1.80E-12 | 1.03E-10 | AP2 domain transcription factor AP2IX-5          |
| TGME49_261070 | -4.20  | 6.54  | 1.92E-12 | 1.08E-10 | apicoplast triosephosphate translocator APT1     |
| TGME49_294640 | -1.70  | 8.84  | 1.96E-12 | 1.10E-10 | ribonucleoside-diphosphate reductase large chain |
| TGME49_290270 | 1.95   | 6.58  | 2.00E-12 | 1.11E-10 | SPRY domain-containing protein                   |
| TGME49_202980 | -2.87  | 7.20  | 2.75E-12 | 1.52E-10 | hypothetical protein                             |
| TGME49_259010 | -5.04  | 6.71  | 3.11E-12 | 1.70E-10 | vacuolar ATP synthase subunit d, putative        |
| TGME49_237210 | -5.01  | 6.72  | 3.34E-12 | 1.82E-10 | Tyrosine kinase-like (TKL) protein               |
| TGME49_228280 | 2.80   | 5.71  | 3.57E-12 | 1.92E-10 | hypothetical protein                             |
| TGME49_259550 | -2.88  | 7.66  | 3.97E-12 | 2.13E-10 | dihydropteroate synthase                         |
| TGME49_231410 | -2.46  | 8.15  | 4.07E-12 | 2.16E-10 | hypothetical protein                             |
| TGME49_272370 | 1.86   | 7.74  | 4.13E-12 | 2.18E-10 | hypothetical protein                             |
| TGME49_294610 | -1.60  | 9.34  | 4.20E-12 | 2.20E-10 | histone lysine methyltransferase, SET, putative  |
| TGME49_241830 | 2.46   | 5.87  | 4.31E-12 | 2.24E-10 | peptidyl-prolyl cis-trans isomerase              |
| TGME49_260800 | 2.39   | 6.32  | 4.45E-12 | 2.30E-10 | hypothetical protein                             |
| TGME49_232650 | 2.05   | 6.75  | 4.59E-12 | 2.36E-10 | hypothetical protein                             |
| TGME49_202420 | 2.21   | 6.26  | 4.77E-12 | 2.43E-10 | hypothetical protein                             |
| TGME49_316280 | -5.04  | 6.90  | 4.91E-12 | 2.48E-10 | transporter, major facilitator family protein    |
| TGME49_214410 | 2.79   | 7.77  | 4.99E-12 | 2.49E-10 | hypothetical protein                             |
| TGME49_232560 | -3.04  | 6.98  | 4.99E-12 | 2.49E-10 | hypothetical protein                             |
| TGME49_253750 | 2.24   | 8.98  | 5.39E-12 | 2.68E-10 | PLU-1 family protein                             |
| TGME49_214970 | -1.94  | 8.91  | 5.84E-12 | 2.88E-10 | DNA replication licensing factor, putative       |
| TGME49_301270 | 1.53   | 8.03  | 6.56E-12 | 3.21E-10 | Tyrosine kinase-like (TKL) protein               |
| TGME49_274060 | -2.24  | 7.69  | 6.75E-12 | 3.26E-10 | 2-oxoglutarate/malate translocase OMT            |
| TGME49_291890 | 1.28   | 11.01 | 7.02E-12 | 3.37E-10 | microneme protein MIC1                           |
| TGME49_293480 | 2.74   | 7.15  | 7.74E-12 | 3.69E-10 | MoeA N-terminal region (domain I and II) domain- |

|               |        |       |          |          |                                                     |
|---------------|--------|-------|----------|----------|-----------------------------------------------------|
| TGME49_246330 | -5.04  | 7.00  | 8.95E-12 | 4.24E-10 | CRAL/TRIO domain-containing protein                 |
| TGME49_208530 | -3.18  | 7.28  | 9.18E-12 | 4.32E-10 | nicotinate phosphoribosyltransferase                |
| TGME49_313870 | 2.00   | 7.32  | 9.48E-12 | 4.43E-10 | zinc finger, C3HC4 type (RING finger) domain-cont   |
| TGME49_255650 | -10.23 | 7.05  | 1.17E-11 | 5.43E-10 | DHHC zinc finger domain-containing protein          |
| TGME49_262380 | -3.40  | 7.00  | 1.28E-11 | 5.93E-10 | elongation factor Tu, putative                      |
| TGME49_207460 | 1.59   | 7.42  | 1.33E-11 | 6.11E-10 | Rab5B protein                                       |
| TGME49_221470 | -2.08  | 8.22  | 1.34E-11 | 6.12E-10 | hypothetical protein                                |
| TGME49_254080 | 1.41   | 7.96  | 1.60E-11 | 7.26E-10 | metal cation transporter, ZIP family protein        |
| TGME49_321650 | -2.67  | 7.47  | 1.62E-11 | 7.29E-10 | hypothetical protein                                |
| TGME49_267670 | 4.04   | 5.56  | 1.67E-11 | 7.43E-10 | hypothetical protein                                |
| TGME49_260440 | 1.42   | 9.39  | 1.67E-11 | 7.43E-10 | nuclear factor NF3                                  |
| TGME49_294770 | -4.96  | 6.84  | 1.71E-11 | 7.57E-10 | Armadillo/beta-catenin family repeat-containing p   |
| TGME49_218530 | -9.93  | 6.40  | 1.72E-11 | 7.57E-10 | proteasome-interacting thioredoxin domain-conta     |
| TGME49_254720 | 1.30   | 9.52  | 1.86E-11 | 8.15E-10 | dense granule protein GRA8                          |
| TGME49_316600 | 1.58   | 8.03  | 1.89E-11 | 8.22E-10 | hypothetical protein                                |
| TGME49_219700 | -1.98  | 8.41  | 2.12E-11 | 9.16E-10 | DNA replication licensing factor MCM4, putative     |
| TGME49_305590 | -4.08  | 6.99  | 2.32E-11 | 9.98E-10 | ABC transporter transmembrane region domain-c       |
| TGME49_213410 | -2.26  | 7.73  | 2.49E-11 | 1.06E-09 | small nuclear ribonucleoprotein f (snrnp-f), putati |
| TGME49_323310 | 4.18   | 5.74  | 2.81E-11 | 1.19E-09 | hypothetical protein                                |
| TGME49_250820 | -2.77  | 7.50  | 2.95E-11 | 1.25E-09 | hypothetical protein                                |
| TGME49_297530 | -9.90  | 6.26  | 3.16E-11 | 1.33E-09 | DNA-directed RNA polymerase I RPA2                  |
| TGME49_299780 | 1.88   | 9.06  | 3.20E-11 | 1.34E-09 | hypothetical protein                                |
| TGME49_226960 | -1.42  | 9.46  | 3.48E-11 | 1.45E-09 | phosphofructokinase PFKII                           |
| TGME49_228190 | -2.01  | 7.95  | 3.52E-11 | 1.45E-09 | eukaryotic initiation factor-3, subunit 5, putative |
| TGME49_207680 | -4.07  | 7.02  | 3.51E-11 | 1.45E-09 | suppressor of kinetochore protein 1, putative       |
| TGME49_310750 | -2.08  | 8.35  | 3.65E-11 | 1.48E-09 | emp24/gp25L/p24 family protein                      |
| TGME49_218880 | -2.55  | 7.48  | 3.63E-11 | 1.48E-09 | SF-assemblin, putative                              |
| TGME49_253570 | 2.47   | 6.14  | 3.81E-11 | 1.54E-09 | hypothetical protein                                |
| TGME49_235130 | -3.68  | 7.38  | 3.93E-11 | 1.58E-09 | transmembrane protein                               |
| TGME49_220250 | 1.74   | 6.94  | 4.10E-11 | 1.64E-09 | Nucleotide-sensitive chloride conductance regulat   |
| TGME49_243430 | 2.37   | 7.87  | 4.82E-11 | 1.92E-09 | OTU family cysteine protease                        |
| TGME49_217700 | -9.90  | 6.41  | 4.92E-11 | 1.94E-09 | AP2 domain transcription factor AP2XII-2            |
| TGME49_254470 | 1.47   | 9.18  | 4.99E-11 | 1.96E-09 | hypothetical protein                                |
| TGME49_211150 | -4.87  | 6.82  | 5.59E-11 | 2.19E-09 | hypothetical protein                                |
| TGME49_203300 | 2.63   | 7.42  | 5.75E-11 | 2.24E-09 | hypothetical protein                                |
| TGME49_268980 | 1.73   | 7.97  | 6.47E-11 | 2.50E-09 | hypothetical protein                                |
| TGME49_278510 | -2.53  | 7.68  | 6.71E-11 | 2.58E-09 | protein phosphatase 2C domain-containing protei     |
| TGME49_227650 | -3.07  | 6.80  | 7.10E-11 | 2.72E-09 | microtubule-associated protein RP/EB family, puta   |
| TGME49_318310 | -2.15  | 7.63  | 7.31E-11 | 2.79E-09 | transketolase                                       |
| TGME49_239420 | 1.07   | 9.63  | 7.50E-11 | 2.84E-09 | protein kinase                                      |
| TGME49_232500 | -9.85  | 6.44  | 7.64E-11 | 2.88E-09 | hypothetical protein                                |
| TGME49_273050 | 2.18   | 6.54  | 7.89E-11 | 2.96E-09 | hypothetical protein                                |
| TGME49_228660 | -3.57  | 6.95  | 7.94E-11 | 2.96E-09 | Sec7 domain-containing protein                      |
| TGME49_250030 | 2.80   | 5.24  | 8.89E-11 | 3.30E-09 | hypothetical protein                                |
| TGME49_239410 | -2.31  | 7.90  | 9.04E-11 | 3.34E-09 | hypothetical protein                                |
| TGME49_228100 | -2.62  | 7.17  | 9.27E-11 | 3.41E-09 | hypothetical protein                                |
| TGME49_204530 | 1.26   | 11.00 | 9.48E-11 | 3.47E-09 | microneme protein MIC11                             |
| TGME49_206610 | -3.63  | 6.76  | 9.95E-11 | 3.62E-09 | pyruvate dehydrogenase complex subunit PDH-E2       |
| TGME49_306060 | -1.39  | 9.70  | 1.05E-10 | 3.79E-09 | rhopty neck protein RON8                            |
| TGME49_231430 | -9.83  | 6.39  | 1.05E-10 | 3.80E-09 | oligosaccharyl transferase stt3 protein, putative   |
| TGME49_201860 | 1.08   | 10.42 | 1.22E-10 | 4.38E-09 | hypothetical protein                                |
| TGME49_223050 | -1.44  | 9.44  | 1.35E-10 | 4.83E-09 | ribosomal protein RPS20                             |
| TGME49_216730 | -1.68  | 8.59  | 1.36E-10 | 4.83E-09 | MCM2/3/5 family protein                             |
| TGME49_216820 | 1.42   | 8.57  | 1.44E-10 | 5.10E-09 | transporter, major facilitator family protein       |

|               |       |       |          |          |                                                     |
|---------------|-------|-------|----------|----------|-----------------------------------------------------|
| TGME49_249540 | 1.55  | 7.36  | 1.49E-10 | 5.25E-09 | hypothetical protein                                |
| TGME49_305180 | -9.79 | 6.43  | 1.50E-10 | 5.25E-09 | Na <sup>+</sup> /H <sup>+</sup> exchanger NHE3      |
| TGME49_200360 | 2.53  | 9.74  | 1.56E-10 | 5.43E-09 | hypothetical protein                                |
| TGME49_255410 | -4.81 | 6.62  | 1.66E-10 | 5.71E-09 | hypothetical protein                                |
| TGME49_316660 | -9.79 | 6.50  | 1.66E-10 | 5.71E-09 | cullin family protein                               |
| TGME49_210682 | 5.42  | 5.90  | 1.73E-10 | 5.93E-09 | hypothetical protein                                |
| TGME49_286450 | 1.08  | 12.69 | 1.86E-10 | 6.33E-09 | dense granule protein GRA5                          |
| TGME49_227810 | 1.36  | 8.87  | 1.94E-10 | 6.55E-09 | roptry kinase family protein ROP11 (incomplete c    |
| TGME49_278800 | -2.27 | 7.62  | 1.94E-10 | 6.55E-09 | zinc finger protein 36 family 3 protein             |
| TGME49_268225 | -5.13 | 6.81  | 2.13E-10 | 7.16E-09 | hypothetical protein                                |
| TGME49_205580 | 1.68  | 7.01  | 2.25E-10 | 7.54E-09 | nuclear factor NF4                                  |
| TGME49_247460 | -1.69 | 8.51  | 2.27E-10 | 7.55E-09 | proliferating cell nuclear antigen PCNA1            |
| TGME49_255180 | -9.77 | 6.36  | 2.35E-10 | 7.78E-09 | ubiquitin carboxyl-terminal hydrolase               |
| TGME49_296010 | -1.92 | 7.91  | 2.57E-10 | 8.49E-09 | phosphatidylinositol 3- and 4-kinase                |
| TGME49_293660 | -3.96 | 6.63  | 2.77E-10 | 9.11E-09 | hypothetical protein                                |
| TGME49_239540 | -9.77 | 6.42  | 2.89E-10 | 9.46E-09 | LEM3 (ligand-effect modulator 3) family / CDC50 f   |
| TGME49_294630 | -2.17 | 7.75  | 2.91E-10 | 9.47E-09 | hypothetical protein                                |
| TGME49_207640 | -2.14 | 7.49  | 2.97E-10 | 9.64E-09 | isoleucyl-tRNA synthetase family protein            |
| TGME49_318770 | -4.78 | 6.44  | 3.12E-10 | 1.01E-08 | aurora kinase(incomplete catalytic triad)           |
| TGME49_314410 | -2.66 | 7.22  | 3.47E-10 | 1.12E-08 | aquarius, putative                                  |
| TGME49_257360 | 2.37  | 6.17  | 3.79E-10 | 1.21E-08 | hypothetical protein                                |
| TGME49_250840 | -9.73 | 6.18  | 3.79E-10 | 1.21E-08 | hypothetical protein                                |
| TGME49_293190 | -2.94 | 7.38  | 4.04E-10 | 1.28E-08 | endonuclease/exonuclease/phosphatase family p       |
| TGME49_253860 | 1.48  | 7.25  | 4.37E-10 | 1.38E-08 | Tyrosine kinase-like (TKL) protein                  |
| TGME49_278050 | -2.35 | 7.70  | 4.84E-10 | 1.52E-08 | proteasome subunit alpha type 1, putative           |
| TGME49_280490 | -2.79 | 7.89  | 4.84E-10 | 1.52E-08 | U-box domain-containing protein                     |
| TGME49_246580 | -3.90 | 6.71  | 5.19E-10 | 1.62E-08 | hypothetical protein                                |
| TGME49_232280 | -9.84 | 6.42  | 5.28E-10 | 1.64E-08 | hypothetical protein                                |
| TGME49_266070 | 1.16  | 9.66  | 6.00E-10 | 1.86E-08 | ribosomal protein RPL31                             |
| TGME49_271820 | -9.72 | 5.98  | 6.33E-10 | 1.95E-08 | lipoyltransferase and lipoate-protein ligase subfan |
| TGME49_321690 | -3.97 | 6.68  | 6.62E-10 | 2.03E-08 | hypothetical protein                                |
| TGME49_227952 | -2.77 | 6.97  | 7.03E-10 | 2.14E-08 | 14-3-3 superfamily protein                          |
| TGME49_293410 | 2.50  | 5.32  | 7.24E-10 | 2.19E-08 | hypothetical protein                                |
| TGME49_212900 | 1.48  | 8.11  | 7.31E-10 | 2.20E-08 | hypothetical protein                                |
| TGME49_313230 | 2.03  | 9.82  | 7.87E-10 | 2.36E-08 | eukaryotic initiation factor-2, alpha subunit       |
| TGME49_250330 | -9.69 | 6.25  | 8.03E-10 | 2.39E-08 | hypothetical protein                                |
| TGME49_294870 | 1.07  | 9.50  | 8.62E-10 | 2.56E-08 | universal stress family protein                     |
| TGME49_315530 | -4.70 | 6.48  | 8.69E-10 | 2.57E-08 | hypothetical protein                                |
| TGME49_267500 | 1.21  | 8.83  | 8.74E-10 | 2.57E-08 | hypothetical protein                                |
| TGME49_205010 | -2.30 | 7.49  | 8.77E-10 | 2.57E-08 | U2 small nuclear ribonucleoprotein family protein   |
| TGME49_229020 | -9.67 | 6.41  | 8.84E-10 | 2.58E-08 | cell-cycle-associated protein kinase CDK, putative  |
| TGME49_206690 | -2.61 | 7.05  | 8.92E-10 | 2.60E-08 | glideosome-associated protein with multiple-mem     |
| TGME49_268230 | -9.94 | 6.51  | 9.69E-10 | 2.80E-08 | hypothetical protein                                |
| TGME49_319370 | -9.68 | 6.12  | 9.73E-10 | 2.80E-08 | hypothetical protein                                |
| TGME49_293710 | -2.10 | 7.43  | 1.01E-09 | 2.91E-08 | Zn-finger in Ran binding protein and others domai   |
| TGME49_294690 | 1.74  | 7.53  | 1.05E-09 | 3.00E-08 | rhomboid protease ROM5                              |
| TGME49_245510 | -2.43 | 7.52  | 1.14E-09 | 3.24E-08 | phospholipid-translocating P-type ATPase, flippase  |
| TGME49_265390 | -9.66 | 6.16  | 1.16E-09 | 3.29E-08 | hypothetical protein                                |
| TGME49_213920 | -3.43 | 6.79  | 1.17E-09 | 3.30E-08 | hypothetical protein                                |
| TGME49_247360 | 2.42  | 7.48  | 1.18E-09 | 3.32E-08 | PAP2 superfamily protein                            |
| TGME49_264830 | -4.67 | 6.49  | 1.20E-09 | 3.35E-08 | hypothetical protein                                |
| TGME49_202310 | 2.07  | 6.20  | 1.23E-09 | 3.43E-08 | O-sialoglycoprotein endopeptidase                   |
| TGME49_234510 | 1.59  | 6.89  | 1.28E-09 | 3.54E-08 | ankyrin repeat-containing protein                   |
| TGME49_290170 | -2.49 | 7.34  | 1.27E-09 | 3.54E-08 | kelch repeat domain containing/Serine/threonine     |



|               |       |      |          |          |                                                     |
|---------------|-------|------|----------|----------|-----------------------------------------------------|
| TGME49_278940 | 1.78  | 6.96 | 1.35E-09 | 3.70E-08 | HECT-domain (ubiquitin-transferase) domain-cont     |
| TGME49_277720 | -2.34 | 7.54 | 1.34E-09 | 3.70E-08 | GDA1/CD39 (nucleoside phosphatase) family prot      |
| TGME49_265110 | -9.66 | 6.03 | 1.35E-09 | 3.70E-08 | ribosome biogenesis protein, putative               |
| TGME49_310030 | -2.04 | 7.62 | 1.39E-09 | 3.80E-08 | cyclase-associated protein, putative                |
| TGME49_315100 | 4.95  | 4.83 | 1.43E-09 | 3.87E-08 | hypothetical protein                                |
| TGME49_254520 | 1.40  | 7.43 | 1.47E-09 | 3.99E-08 | mediator complex subunit MED11                      |
| TGME49_212170 | -9.63 | 5.94 | 1.48E-09 | 3.99E-08 | GIY-YIG catalytic domain-containing protein         |
| TGME49_265870 | -3.46 | 6.97 | 1.60E-09 | 4.32E-08 | pantoate-beta-alanine ligase                        |
| TGME49_213010 | -4.86 | 7.34 | 1.65E-09 | 4.43E-08 | hypothetical protein                                |
| TGME49_286460 | 3.16  | 5.00 | 1.66E-09 | 4.43E-08 | hypothetical protein                                |
| TGME49_254410 | 1.95  | 6.78 | 1.77E-09 | 4.70E-08 | protein phosphatase 2C, putative                    |
| TGME49_230410 | -1.96 | 8.00 | 1.80E-09 | 4.78E-08 | peroxiredoxin PRX3                                  |
| TGME49_208020 | 2.18  | 6.12 | 1.88E-09 | 4.97E-08 | AP2 domain transcription factor AP2Ib-1             |
| TGME49_313290 | 1.71  | 6.91 | 1.89E-09 | 4.97E-08 | MORN repeat-containing protein                      |
| TGME49_309990 | 4.23  | 6.06 | 1.92E-09 | 5.04E-08 | hypothetical protein                                |
| TGME49_315780 | -3.14 | 6.99 | 1.96E-09 | 5.13E-08 | myosin regulatory light chain, putative             |
| TGME49_289370 | 1.70  | 7.66 | 1.99E-09 | 5.17E-08 | hypothetical protein                                |
| TGME49_224880 | -3.47 | 7.04 | 2.09E-09 | 5.39E-08 | kinesin motor domain-containing protein             |
| TGME49_240870 | -2.71 | 7.10 | 2.12E-09 | 5.46E-08 | beta adaptin protein, putative                      |
| TGME49_277940 | -3.85 | 6.79 | 2.12E-09 | 5.46E-08 | hypothetical protein                                |
| TGME49_252880 | -2.57 | 7.29 | 2.13E-09 | 5.46E-08 | hypothetical protein                                |
| TGME49_254050 | 1.64  | 6.83 | 2.15E-09 | 5.48E-08 | optic atrophy 3 protein (opa3) protein              |
| TGME49_239590 | -4.66 | 6.37 | 2.17E-09 | 5.52E-08 | WD domain, G-beta repeat-containing protein         |
| TGME49_237550 | 2.81  | 6.56 | 2.37E-09 | 5.97E-08 | hypothetical protein                                |
| TGME49_258150 | -1.92 | 7.78 | 2.36E-09 | 5.97E-08 | proteasome subunit alpha type 7, putative           |
| TGME49_297745 | -4.27 | 6.99 | 2.61E-09 | 6.51E-08 | hypothetical protein                                |
| TGME49_239270 | -2.16 | 7.56 | 2.83E-09 | 7.05E-08 | hypothetical protein                                |
| TGME49_281400 | -3.21 | 6.55 | 2.89E-09 | 7.17E-08 | phosphofructokinase domain-containing protein       |
| TGME49_318660 | 1.26  | 8.55 | 2.95E-09 | 7.28E-08 | PP2C, putative                                      |
| TGME49_305060 | 1.48  | 7.66 | 3.02E-09 | 7.43E-08 | CAP-Gly domain-containing protein                   |
| TGME49_262970 | 1.65  | 7.12 | 3.05E-09 | 7.48E-08 | hypothetical protein                                |
| TGME49_229690 | -9.57 | 6.55 | 3.40E-09 | 8.34E-08 | autophagy-related protein 7 atg7, putative          |
| TGME49_214575 | 2.05  | 5.96 | 3.50E-09 | 8.52E-08 | hypothetical protein                                |
| TGME49_229470 | -4.65 | 6.35 | 3.51E-09 | 8.52E-08 | hypothetical protein                                |
| TGME49_251440 | -9.71 | 5.79 | 3.51E-09 | 8.52E-08 | troponin c, isotype gamma, putative                 |
| TGME49_226705 | -9.69 | 6.39 | 3.75E-09 | 9.06E-08 | hypothetical protein                                |
| TGME49_246490 | -2.25 | 7.46 | 3.81E-09 | 9.17E-08 | hypothetical protein                                |
| TGME49_220880 | 1.93  | 6.18 | 3.90E-09 | 9.36E-08 | hypothetical protein                                |
| TGME49_225580 | -9.55 | 5.94 | 3.96E-09 | 9.47E-08 | proteasome (prosome, macropain) 26S subunit, n      |
| TGME49_209060 | -3.78 | 6.66 | 4.01E-09 | 9.56E-08 | thrombospondin type 1 domain-containing protei      |
| TGME49_265790 | 1.15  | 8.70 | 4.03E-09 | 9.58E-08 | hypothetical protein                                |
| TGME49_215590 | -1.91 | 8.31 | 4.13E-09 | 9.80E-08 | flavoprotein subunit of succinate dehydrogenase     |
| TGME49_247960 | 2.06  | 6.05 | 4.26E-09 | 1.01E-07 | hypothetical protein                                |
| TGME49_214140 | 1.26  | 8.62 | 4.41E-09 | 1.04E-07 | hypothetical protein                                |
| TGME49_218560 | -1.88 | 7.74 | 4.44E-09 | 1.04E-07 | acetyl-coA carboxylase ACC2                         |
| TGME49_214230 | 1.64  | 6.85 | 4.48E-09 | 1.05E-07 | Dopey, N-terminal domain-containing protein         |
| TGME49_254370 | -1.66 | 8.18 | 4.56E-09 | 1.06E-07 | guanylyl cyclase                                    |
| TGME49_260180 | -1.99 | 7.68 | 4.57E-09 | 1.06E-07 | hypothetical protein                                |
| TGME49_203830 | -3.79 | 6.38 | 4.78E-09 | 1.11E-07 | FHA domain-containing protein                       |
| TGME49_265500 | -9.53 | 6.01 | 5.20E-09 | 1.20E-07 | chloride transporter, chloride channel (ClC) family |
| TGME49_219730 | 1.55  | 7.57 | 5.27E-09 | 1.21E-07 | hypothetical protein                                |
| TGME49_272010 | -4.60 | 6.12 | 5.43E-09 | 1.25E-07 | Gar1 protein RNA binding region protein             |
| TGME49_254220 | 2.33  | 5.45 | 5.46E-09 | 1.25E-07 | hypothetical protein                                |
| TGME49_237890 | -4.58 | 6.17 | 5.51E-09 | 1.26E-07 | calcium-dependent protein kinase CDPK4              |

|               |       |       |          |          |                                                           |
|---------------|-------|-------|----------|----------|-----------------------------------------------------------|
| TGME49_218362 | -2.67 | 6.89  | 5.53E-09 | 1.26E-07 | zinc finger protein ZFP1                                  |
| TGME49_209440 | -2.15 | 7.38  | 5.72E-09 | 1.30E-07 | hypothetical protein                                      |
| TGME49_232710 | -1.08 | 10.10 | 5.82E-09 | 1.32E-07 | ribosomal protein RPS3A                                   |
| TGME49_222860 | -1.58 | 8.81  | 5.86E-09 | 1.32E-07 | eukaryotic translation initiation factor, putative        |
| TGME49_274190 | -4.63 | 6.59  | 5.89E-09 | 1.32E-07 | eukaryotic initiation factor 2B epsilon subunit, putative |
| TGME49_248260 | 2.20  | 6.49  | 5.96E-09 | 1.34E-07 | hypothetical protein                                      |
| TGME49_254030 | 2.15  | 8.18  | 6.03E-09 | 1.35E-07 | zinc finger CDGSH-type domain-containing protein          |
| TGME49_295080 | -9.53 | 5.79  | 6.08E-09 | 1.35E-07 | hypothetical protein                                      |
| TGME49_267620 | -3.12 | 6.97  | 6.12E-09 | 1.36E-07 | multi-pass transmembrane protein                          |
| TGME49_246570 | 2.72  | 5.60  | 6.28E-09 | 1.39E-07 | hypothetical protein                                      |
| TGME49_231150 | 2.64  | 5.08  | 6.30E-09 | 1.39E-07 | hypothetical protein                                      |
| TGME49_211250 | -3.07 | 6.81  | 6.32E-09 | 1.39E-07 | hypothetical protein                                      |
| TGME49_231950 | 1.86  | 7.62  | 6.39E-09 | 1.40E-07 | hypothetical protein                                      |
| TGME49_289300 | -2.17 | 7.33  | 6.46E-09 | 1.41E-07 | methionyl-tRNA synthetase                                 |
| TGME49_205360 | -2.51 | 7.08  | 6.48E-09 | 1.41E-07 | hypothetical protein                                      |
| TGME49_251170 | 2.93  | 6.41  | 6.62E-09 | 1.44E-07 | KRUF family protein                                       |
| TGME49_276970 | -3.33 | 6.73  | 7.01E-09 | 1.52E-07 | hypothetical protein                                      |
| TGME49_269660 | -2.64 | 6.75  | 7.03E-09 | 1.52E-07 | TFIIH basal transcription factor complex helicase X       |
| TGME49_252390 | 1.43  | 8.54  | 7.33E-09 | 1.58E-07 | hypothetical protein                                      |
| TGME49_266750 | -1.78 | 7.68  | 7.40E-09 | 1.59E-07 | transporter/permease protein, putative                    |
| TGME49_221675 | 1.34  | 7.82  | 7.59E-09 | 1.62E-07 | hypothetical protein                                      |
| TGME49_266990 | -1.79 | 7.81  | 7.59E-09 | 1.62E-07 | beta-COP                                                  |
| TGME49_312110 | -2.50 | 7.05  | 7.92E-09 | 1.68E-07 | apicoplast-associated thioredoxin family protein A        |
| TGME49_268176 | -2.82 | 7.14  | 8.33E-09 | 1.76E-07 | hypothetical protein                                      |
| TGME49_237170 | -3.09 | 6.80  | 8.42E-09 | 1.78E-07 | hypothetical protein                                      |
| TGME49_238100 | -2.33 | 7.30  | 8.48E-09 | 1.79E-07 | transmembrane protein                                     |
| TGME49_254730 | 1.89  | 6.04  | 8.67E-09 | 1.82E-07 | POPLD (NUC188) domain-containing protein                  |
| TGME49_235020 | -1.87 | 7.85  | 8.68E-09 | 1.82E-07 | COPI protein, putative                                    |
| TGME49_262150 | -9.48 | 5.98  | 8.71E-09 | 1.82E-07 | kelch repeat and K+ channel tetramerisation domain        |
| TGME49_295990 | 1.50  | 7.35  | 8.78E-09 | 1.83E-07 | ubiquitin conjugating enzyme E2, putative                 |
| TGME49_249530 | -1.80 | 7.70  | 8.84E-09 | 1.84E-07 | exportin 1, putative                                      |
| TGME49_319880 | -4.52 | 6.31  | 8.87E-09 | 1.84E-07 | MORN repeat-containing protein                            |
| TGME49_283540 | 1.64  | 8.26  | 8.96E-09 | 1.85E-07 | hypothetical protein                                      |
| TGME49_229420 | -9.48 | 6.04  | 9.16E-09 | 1.89E-07 | cytochrome c, putative                                    |
| TGME49_310460 | -2.85 | 7.01  | 9.41E-09 | 1.93E-07 | Rab6                                                      |
| TGME49_204520 | 2.74  | 4.97  | 9.45E-09 | 1.94E-07 | hypothetical protein                                      |
| TGME49_222710 | -2.82 | 6.78  | 9.73E-09 | 1.99E-07 | IMP-specific 5'-nucleotidase 1, putative                  |
| TGME49_213660 | -1.51 | 9.72  | 1.02E-08 | 2.08E-07 | zinc finger (CCCH type) motif-containing protein          |
| TGME49_202470 | -9.48 | 5.84  | 1.06E-08 | 2.15E-07 | rRNA metabolism protein, SBDS family protein              |
| TGME49_290980 | -2.82 | 6.72  | 1.08E-08 | 2.18E-07 | glycine C-acetyltransferase, putative                     |
| TGME49_263550 | 1.66  | 6.57  | 1.16E-08 | 2.35E-07 | 39S ribosomal protein L47, mitochondrial precursor        |
| TGME49_219080 | -9.48 | 5.98  | 1.19E-08 | 2.39E-07 | edge expressed protein, putative                          |
| TGME49_293740 | 1.80  | 8.89  | 1.22E-08 | 2.45E-07 | hypothetical protein                                      |
| TGME49_263490 | 2.11  | 5.71  | 1.23E-08 | 2.46E-07 | ubiquitin conjugating enzyme E2, putative                 |
| TGME49_219810 | 1.87  | 8.82  | 1.24E-08 | 2.46E-07 | hypothetical protein                                      |
| TGME49_205040 | -1.79 | 7.70  | 1.24E-08 | 2.46E-07 | PGAP1 family protein                                      |
| TGME49_270770 | -4.56 | 6.36  | 1.23E-08 | 2.46E-07 | PWI domain-containing protein                             |
| TGME49_213067 | 1.34  | 7.78  | 1.28E-08 | 2.54E-07 | hypothetical protein                                      |
| TGME49_237015 | 1.45  | 7.91  | 1.30E-08 | 2.57E-07 | hypothetical protein                                      |
| TGME49_280730 | -9.46 | 5.83  | 1.31E-08 | 2.58E-07 | cytosolic fe-s cluster assembling factor nbp35, putative  |
| TGME49_227420 | -9.48 | 5.89  | 1.48E-08 | 2.91E-07 | 4-hydroxy-3-methylbut-2-enyl diphosphate reductase        |
| TGME49_310220 | -4.57 | 6.48  | 1.49E-08 | 2.93E-07 | hypothetical protein                                      |
| TGME49_318400 | -2.00 | 7.52  | 1.51E-08 | 2.95E-07 | hypothetical protein                                      |
| TGME49_257520 | 1.53  | 7.16  | 1.59E-08 | 3.10E-07 | synaptobrevin protein                                     |

|               |       |       |          |          |                                                  |
|---------------|-------|-------|----------|----------|--------------------------------------------------|
| TGME49_226220 | -2.77 | 6.89  | 1.65E-08 | 3.20E-07 | alveolin domain containing intermediate filament |
| TGME49_244910 | -3.71 | 6.82  | 1.65E-08 | 3.20E-07 | MIZ/SP-RING zinc finger domain-containing protei |
| TGME49_309380 | -3.25 | 6.60  | 1.69E-08 | 3.27E-07 | Nuf2                                             |
| TGME49_274110 | -9.43 | 5.68  | 1.70E-08 | 3.28E-07 | glycoprotease family protein                     |
| TGME49_225250 | 2.04  | 5.93  | 1.71E-08 | 3.30E-07 | LSU ribosomal protein L14P, putative             |
| TGME49_223010 | -3.26 | 6.45  | 1.75E-08 | 3.35E-07 | hypothetical protein                             |
| TGME49_278720 | -9.47 | 5.75  | 1.81E-08 | 3.47E-07 | hypothetical protein                             |
| TGME49_320130 | 1.97  | 5.97  | 1.85E-08 | 3.53E-07 | hypothetical protein                             |
| TGME49_267690 | -4.49 | 6.16  | 1.97E-08 | 3.76E-07 | hypothetical protein                             |
| TGME49_222930 | -2.77 | 6.77  | 1.99E-08 | 3.78E-07 | hypothetical protein                             |
| TGME49_297800 | -3.02 | 6.62  | 1.99E-08 | 3.78E-07 | RecF/RecN/SMC N terminal domain-containing pr    |
| TGME49_203730 | -9.41 | 5.89  | 2.03E-08 | 3.83E-07 | hypothetical protein                             |
| TGME49_226910 | -4.49 | 6.44  | 2.06E-08 | 3.88E-07 | Amylo-alpha-1,6-glucosidase                      |
| TGME49_266410 | 1.84  | 6.23  | 2.10E-08 | 3.95E-07 | hypothetical protein                             |
| TGME49_292130 | -1.14 | 9.66  | 2.22E-08 | 4.17E-07 | ribosomal protein RPL13A                         |
| TGME49_289730 | -2.34 | 7.06  | 2.23E-08 | 4.17E-07 | Pep3/Vps18/deep orange family protein            |
| TGME49_201870 | -2.79 | 6.58  | 2.36E-08 | 4.40E-07 | tetratricopeptide repeat-containing protein      |
| TGME49_216020 | -9.41 | 6.06  | 2.36E-08 | 4.40E-07 | peptidase family c78 protein                     |
| TGME49_313445 | 2.13  | 5.72  | 2.39E-08 | 4.44E-07 | hypothetical protein                             |
| TGME49_225990 | -3.24 | 6.32  | 2.42E-08 | 4.49E-07 | acyl transferase domain-containing protein       |
| TGME49_240860 | -3.69 | 6.54  | 2.45E-08 | 4.53E-07 | acyltransferase domain-containing protein        |
| TGME49_285140 | -9.42 | 6.26  | 2.55E-08 | 4.70E-07 | hypothetical protein                             |
| TGME49_319580 | -9.39 | 5.99  | 2.67E-08 | 4.91E-07 | hypothetical protein                             |
| TGME49_247580 | -9.41 | 5.86  | 2.78E-08 | 5.10E-07 | glutaredoxin domain-containing protein           |
| TGME49_253470 | 1.68  | 7.35  | 2.98E-08 | 5.45E-07 | alveolin domain containing intermediate filament |
| TGME49_246100 | -2.64 | 6.79  | 2.99E-08 | 5.45E-07 | phosducin, putative                              |
| TGME49_270930 | -3.02 | 6.90  | 3.05E-08 | 5.56E-07 | hypothetical protein                             |
| TGME49_241240 | 1.03  | 9.79  | 3.27E-08 | 5.94E-07 | hypothetical protein                             |
| TGME49_294940 | 1.69  | 6.95  | 3.42E-08 | 6.16E-07 | hypothetical protein                             |
| TGME49_226500 | -4.54 | 6.63  | 3.42E-08 | 6.16E-07 | hypothetical protein                             |
| TGME49_226430 | -1.44 | 8.72  | 3.45E-08 | 6.20E-07 | reticulon protein                                |
| TGME49_299250 | 2.72  | 6.36  | 3.55E-08 | 6.36E-07 | hypothetical protein                             |
| TGME49_288820 | 1.59  | 6.83  | 3.59E-08 | 6.43E-07 | hypothetical protein                             |
| TGME49_247760 | -2.95 | 6.83  | 3.67E-08 | 6.55E-07 | AMP-binding enzyme domain-containing protein     |
| TGME49_311720 | -1.01 | 11.50 | 3.74E-08 | 6.66E-07 | chaperonin protein BiP                           |
| TGME49_306660 | 1.31  | 7.88  | 3.78E-08 | 6.71E-07 | RNA pseudouridine synthase superfamily protein   |
| TGME49_254000 | 1.44  | 7.06  | 3.80E-08 | 6.73E-07 | hypothetical protein                             |
| TGME49_233140 | -2.54 | 7.17  | 3.90E-08 | 6.90E-07 | deoxyuridine 5'-triphosphate nucleotidohydrolase |
| TGME49_280400 | -9.41 | 7.58  | 4.12E-08 | 7.26E-07 | hypothetical protein                             |
| TGME49_290160 | -1.66 | 8.18  | 4.31E-08 | 7.59E-07 | sortilin, putative                               |
| TGME49_271470 | -4.41 | 6.12  | 4.36E-08 | 7.66E-07 | hypothetical protein                             |
| TGME49_214960 | 1.60  | 7.09  | 4.38E-08 | 7.68E-07 | AP2 domain transcription factor AP2X-8           |
| TGME49_202920 | -9.36 | 6.07  | 4.50E-08 | 7.87E-07 | p-aminobenzoic acid synthase                     |
| TGME49_309590 | 1.01  | 12.11 | 4.52E-08 | 7.89E-07 | roptry protein ROP1                              |
| TGME49_270270 | -3.68 | 6.69  | 4.64E-08 | 8.07E-07 | hypothetical protein                             |
| TGME49_271810 | -1.62 | 7.84  | 4.80E-08 | 8.33E-07 | lanp, putative                                   |
| TGME49_286260 | -9.33 | 5.83  | 4.86E-08 | 8.41E-07 | tetratricopeptide repeat-containing protein      |
| TGME49_216770 | -4.44 | 5.97  | 4.88E-08 | 8.43E-07 | hypothetical protein                             |
| TGME49_205750 | -2.90 | 6.42  | 4.99E-08 | 8.60E-07 | histone deacetylase complex subunit Sin3         |
| TGME49_201400 | -4.43 | 6.24  | 5.03E-08 | 8.66E-07 | Sin3-associated polypeptide SAP18                |
| TGME49_273905 | -4.39 | 6.09  | 5.08E-08 | 8.71E-07 | hypothetical protein                             |
| TGME49_249360 | -2.40 | 6.90  | 5.17E-08 | 8.84E-07 | RED family protein                               |
| TGME49_310450 | -2.42 | 7.13  | 5.17E-08 | 8.84E-07 | myosin heavy chain, putative                     |
| TGME49_248860 | 2.36  | 5.75  | 5.24E-08 | 8.93E-07 | hypothetical protein                             |

|               |       |       |          |          |                                                             |
|---------------|-------|-------|----------|----------|-------------------------------------------------------------|
| TGME49_222400 | 1.21  | 7.58  | 5.36E-08 | 9.12E-07 | hypothetical protein                                        |
| TGME49_313880 | -9.36 | 5.91  | 5.40E-08 | 9.16E-07 | nuclear protein-like family protein                         |
| TGME49_247220 | 1.32  | 8.50  | 5.45E-08 | 9.21E-07 | nudix -type motif 9 isoform a family protein                |
| TGME49_246930 | -2.21 | 7.26  | 5.45E-08 | 9.21E-07 | calmodulin CAM1                                             |
| TGME49_259710 | -2.95 | 7.07  | 5.48E-08 | 9.24E-07 | protein kinase                                              |
| TGME49_313380 | -1.15 | 9.56  | 5.74E-08 | 9.64E-07 | hypothetical protein                                        |
| TGME49_214200 | -9.38 | 5.94  | 5.75E-08 | 9.64E-07 | WD domain, G-beta repeat-containing protein                 |
| TGME49_243930 | 1.38  | 8.92  | 5.88E-08 | 9.84E-07 | hypothetical protein                                        |
| TGME49_215420 | -9.31 | 5.72  | 6.08E-08 | 1.02E-06 | SNARE protein                                               |
| TGME49_311680 | -1.89 | 7.31  | 6.15E-08 | 1.02E-06 | FUN14 family protein                                        |
| TGME49_259200 | -4.39 | 6.05  | 6.21E-08 | 1.03E-06 | Na <sup>+</sup> /H <sup>+</sup> exchanger NHE1              |
| TGME49_268580 | -4.42 | 6.06  | 6.21E-08 | 1.03E-06 | hypothetical protein                                        |
| TGME49_269450 | 2.62  | 5.12  | 6.39E-08 | 1.06E-06 | hypothetical protein                                        |
| TGME49_266450 | 1.76  | 6.38  | 6.57E-08 | 1.08E-06 | lysine decarboxylase family protein                         |
| TGME49_288360 | -1.46 | 10.08 | 6.63E-08 | 1.09E-06 | tryptophanyl-tRNA synthetase (TrpRS2)                       |
| TGME49_261480 | 1.77  | 6.87  | 6.82E-08 | 1.12E-06 | phosphatidyl serine synthase                                |
| TGME49_210245 | -9.40 | 5.61  | 6.91E-08 | 1.13E-06 | hypothetical protein                                        |
| TGME49_288400 | -9.31 | 6.03  | 6.97E-08 | 1.14E-06 | LETM1 family protein                                        |
| TGME49_226810 | -3.20 | 6.80  | 7.05E-08 | 1.15E-06 | histone lysine methyltransferase SET1                       |
| TGME49_239800 | -2.88 | 6.90  | 7.08E-08 | 1.15E-06 | hypothetical protein                                        |
| TGME49_270550 | -9.37 | 5.78  | 7.28E-08 | 1.18E-06 | gamma-glutamyl phosphate reductase, putative                |
| TGME49_249250 | 1.28  | 10.07 | 7.46E-08 | 1.20E-06 | ribosomal protein RPL35A                                    |
| TGME49_207880 | -9.44 | 6.72  | 7.50E-08 | 1.21E-06 | hypothetical protein                                        |
| TGME49_269920 | -1.46 | 8.62  | 7.76E-08 | 1.24E-06 | phosphatidylserine decarboxylase                            |
| TGME49_278815 | -3.62 | 6.59  | 8.03E-08 | 1.29E-06 | hypothetical protein                                        |
| TGME49_207690 | -4.37 | 6.36  | 8.14E-08 | 1.30E-06 | programmed cell death 5 protein                             |
| TGME49_203720 | 2.55  | 8.00  | 8.47E-08 | 1.35E-06 | vitamin k epoxide reductase family protein                  |
| TGME49_237500 | 1.34  | 7.44  | 8.57E-08 | 1.36E-06 | protein phosphatase 2C domain-containing protein            |
| TGME49_320090 | -3.11 | 6.48  | 9.07E-08 | 1.44E-06 | hypothetical protein                                        |
| TGME49_286630 | -1.68 | 7.93  | 9.41E-08 | 1.49E-06 | redoxin domain-containing protein                           |
| TGME49_257380 | 1.16  | 8.41  | 9.45E-08 | 1.49E-06 | hypothetical protein                                        |
| TGME49_225050 | -1.78 | 7.46  | 9.59E-08 | 1.51E-06 | adenosylhomocysteinase, putative                            |
| TGME49_305980 | -2.30 | 7.06  | 9.96E-08 | 1.57E-06 | pyruvate dehydrogenase complex subunit PDH-E3               |
| TGME49_289600 | 1.41  | 7.82  | 1.01E-07 | 1.59E-06 | heat shock protein HSP29                                    |
| TGME49_223760 | -9.25 | 6.03  | 1.07E-07 | 1.67E-06 | hypothetical protein                                        |
| TGME49_289050 | 1.24  | 8.43  | 1.09E-07 | 1.70E-06 | FIKK kinase, putative                                       |
| TGME49_213060 | 1.66  | 6.59  | 1.13E-07 | 1.76E-06 | WD domain, G-beta repeat-containing protein                 |
| TGME49_269690 | 1.26  | 8.07  | 1.15E-07 | 1.79E-06 | hypothetical protein                                        |
| TGME49_228750 | -3.59 | 6.46  | 1.16E-07 | 1.80E-06 | TGME49_228750 CAM kinase, RAD family                        |
| TGME49_315250 | -4.35 | 6.00  | 1.18E-07 | 1.83E-06 | GAMM1 protein, putative                                     |
| TGME49_320490 | 1.85  | 8.78  | 1.19E-07 | 1.84E-06 | N-acyl-phosphatidylethanolamine-hydrolyzing phospholipase   |
| TGME49_312300 | -1.87 | 7.41  | 1.20E-07 | 1.85E-06 | Sec7 domain-containing protein                              |
| TGME49_260670 | -9.26 | 5.92  | 1.23E-07 | 1.89E-06 | centrin, putative                                           |
| TGME49_273815 | -9.34 | 5.51  | 1.25E-07 | 1.92E-06 | hypothetical protein                                        |
| TGME49_299200 | 1.77  | 7.09  | 1.25E-07 | 1.92E-06 | Bet3 transport protein, putative                            |
| TGME49_236250 | 2.11  | 5.67  | 1.27E-07 | 1.95E-06 | regulator of chromosome condensation (RCC1) related protein |
| TGME49_204310 | -1.40 | 8.50  | 1.32E-07 | 2.02E-06 | hypothetical protein                                        |
| TGME49_292160 | 1.77  | 6.10  | 1.37E-07 | 2.09E-06 | hypothetical protein                                        |
| TGME49_234980 | 1.96  | 6.57  | 1.39E-07 | 2.11E-06 | hypothetical protein                                        |
| TGME49_215390 | 2.45  | 4.82  | 1.42E-07 | 2.15E-06 | TIM10 family protein, putative                              |
| TGME49_291940 | -4.30 | 6.39  | 1.43E-07 | 2.16E-06 | hypothetical protein                                        |
| TGME49_234390 | -9.29 | 5.43  | 1.43E-07 | 2.16E-06 | hypothetical protein                                        |
| TGME49_289580 | -9.23 | 6.04  | 1.47E-07 | 2.22E-06 | strictosidine synthase subfamily protein                    |
| TGME49_205510 | -1.74 | 7.70  | 1.48E-07 | 2.23E-06 | nucleolar protein 5, putative                               |

|               |       |      |          |          |                                                     |
|---------------|-------|------|----------|----------|-----------------------------------------------------|
| TGME49_224540 | -9.38 | 6.05 | 1.48E-07 | 2.23E-06 | hypothetical protein                                |
| TGME49_284190 | -3.70 | 6.62 | 1.50E-07 | 2.25E-06 | pyruvate carboxylase                                |
| TGME49_227060 | -9.25 | 5.72 | 1.51E-07 | 2.26E-06 | hypothetical protein                                |
| TGME49_221720 | -4.62 | 6.44 | 1.53E-07 | 2.28E-06 | hypothetical protein                                |
| TGME49_238200 | 1.96  | 6.96 | 1.61E-07 | 2.40E-06 | alpha/beta hydrolase fold domain-containing prot    |
| TGME49_304460 | -1.70 | 7.52 | 1.63E-07 | 2.43E-06 | zinc finger, C3HC4 type (RING finger) domain-cont   |
| TGME49_205540 | -9.24 | 5.64 | 1.66E-07 | 2.46E-06 | DEAD/DEAH box helicase domain-containing prote      |
| TGME49_269650 | -1.97 | 7.00 | 1.67E-07 | 2.47E-06 | FFD and TFG box motifs protein                      |
| TGME49_320588 | -9.23 | 6.31 | 1.68E-07 | 2.48E-06 | glycosyl hydrolases family 35 protein               |
| TGME49_320640 | -9.26 | 6.10 | 1.77E-07 | 2.60E-06 | peptidylprolyl isomerase domain-containing prote    |
| TGME49_265010 | -9.20 | 5.64 | 1.82E-07 | 2.67E-06 | glutamate 5-kinase domain-containing protein        |
| TGME49_314540 | -9.20 | 5.67 | 1.84E-07 | 2.70E-06 | hypothetical protein                                |
| TGME49_204420 | 3.59  | 6.08 | 1.90E-07 | 2.78E-06 | oocyst wall protein OWP1                            |
| TGME49_263630 | 1.20  | 7.63 | 1.91E-07 | 2.78E-06 | hypothetical protein                                |
| TGME49_288945 | -2.45 | 6.28 | 1.92E-07 | 2.80E-06 | hypothetical protein                                |
| TGME49_240570 | -2.67 | 6.80 | 1.95E-07 | 2.83E-06 | hypothetical protein                                |
| TGME49_249590 | -1.74 | 7.72 | 2.01E-07 | 2.91E-06 | proteasome subunit alpha type 5-2, putative         |
| TGME49_216430 | -1.75 | 7.55 | 2.05E-07 | 2.96E-06 | TBC domain-containing protein                       |
| TGME49_282000 | 1.79  | 6.72 | 2.08E-07 | 3.00E-06 | hypothetical protein                                |
| TGME49_242055 | -9.20 | 5.77 | 2.08E-07 | 3.00E-06 | DEAD/DEAH box helicase domain-containing prote      |
| TGME49_318210 | -9.22 | 5.53 | 2.10E-07 | 3.02E-06 | hypothetical protein                                |
| TGME49_246970 | -9.20 | 5.55 | 2.12E-07 | 3.05E-06 | 3'-5' exonuclease domain-containing protein         |
| TGME49_280770 | -1.52 | 7.52 | 2.19E-07 | 3.14E-06 | regulator of chromosome condensation (RCC1) re      |
| TGME49_319910 | 1.82  | 5.94 | 2.20E-07 | 3.14E-06 | WD domain, G-beta repeat-containing protein         |
| TGME49_222960 | -9.20 | 5.95 | 2.22E-07 | 3.16E-06 | SCY kinase-related protein (incomplete catalytic tr |
| TGME49_239740 | 1.01  | 9.34 | 2.30E-07 | 3.27E-06 | dense granule protein GRA14                         |
| TGME49_310930 | -3.09 | 6.48 | 2.31E-07 | 3.28E-06 | hypothetical protein                                |
| TGME49_278630 | -9.17 | 5.70 | 2.37E-07 | 3.35E-06 | tetratricopeptide repeat-containing protein         |
| TGME49_220950 | 1.20  | 9.89 | 2.39E-07 | 3.38E-06 | hypothetical protein                                |
| TGME49_225745 | -9.20 | 6.00 | 2.40E-07 | 3.38E-06 | hypothetical protein                                |
| TGME49_207100 | -9.17 | 5.81 | 2.41E-07 | 3.40E-06 | hypothetical protein                                |
| TGME49_271460 | 2.14  | 6.76 | 2.42E-07 | 3.40E-06 | protein c14orf29, putative                          |
| TGME49_239752 | -1.50 | 8.30 | 2.44E-07 | 3.42E-06 | hypothetical protein                                |
| TGME49_297870 | -2.35 | 6.90 | 2.50E-07 | 3.50E-06 | hypothetical protein                                |
| TGME49_226590 | 1.50  | 9.66 | 2.58E-07 | 3.59E-06 | cytochrome C oxidase subunit IIa, putative          |
| TGME49_236890 | 1.44  | 7.15 | 2.58E-07 | 3.59E-06 | hypothetical protein                                |
| TGME49_241890 | -9.17 | 5.67 | 2.58E-07 | 3.59E-06 | hypothetical protein                                |
| TGME49_228770 | -4.30 | 5.98 | 2.59E-07 | 3.59E-06 | hypothetical protein                                |
| TGME49_222210 | -9.17 | 5.46 | 2.59E-07 | 3.59E-06 | SPFH domain / Band 7 family protein                 |
| TGME49_271060 | -4.26 | 5.87 | 2.64E-07 | 3.66E-06 | Sec1 family protein                                 |
| TGME49_253180 | 2.52  | 7.48 | 2.73E-07 | 3.76E-06 | hypothetical protein                                |
| TGME49_203740 | -2.48 | 6.73 | 2.77E-07 | 3.81E-06 | hypothetical protein                                |
| TGME49_205280 | 1.30  | 7.65 | 2.78E-07 | 3.82E-06 | hypothetical protein                                |
| TGME49_313400 | -2.19 | 7.11 | 2.91E-07 | 3.98E-06 | DnaJ domain-containing protein                      |
| TGME49_201680 | -1.13 | 8.83 | 2.94E-07 | 4.02E-06 | eukaryotic initiation factor-3 subunit 10, putative |
| TGME49_311070 | -3.53 | 6.42 | 2.96E-07 | 4.04E-06 | hypothetical protein                                |
| TGME49_205200 | 1.37  | 6.83 | 2.97E-07 | 4.04E-06 | hypothetical protein                                |
| TGME49_250670 | 1.80  | 6.89 | 3.02E-07 | 4.11E-06 | hypothetical protein                                |
| TGME49_212270 | 2.01  | 9.40 | 3.03E-07 | 4.11E-06 | hypothetical protein                                |
| TGME49_219860 | -1.38 | 8.73 | 3.05E-07 | 4.13E-06 | replication licensing factor, putative              |
| TGME49_248490 | 2.15  | 6.17 | 3.09E-07 | 4.18E-06 | hypothetical protein                                |
| TGME49_245730 | -9.14 | 5.76 | 3.16E-07 | 4.25E-06 | phosphatidylinositol-4-phosphate 5-Kinase           |
| TGME49_203560 | -9.21 | 5.94 | 3.16E-07 | 4.25E-06 | hypothetical protein                                |
| TGME49_282150 | -9.14 | 5.86 | 3.30E-07 | 4.43E-06 | hypothetical protein                                |

|               |       |       |          |          |                                                     |
|---------------|-------|-------|----------|----------|-----------------------------------------------------|
| TGME49_239020 | -9.22 | 6.19  | 3.32E-07 | 4.45E-06 | ABC transporter transmembrane region domain-c       |
| TGME49_306440 | -9.14 | 6.04  | 3.36E-07 | 4.49E-06 | hypothetical protein                                |
| TGME49_305860 | -1.98 | 7.93  | 3.47E-07 | 4.64E-06 | calcium-dependent protein kinase CDPK3              |
| TGME49_216070 | -9.14 | 5.74  | 3.48E-07 | 4.64E-06 | hypothetical protein                                |
| TGME49_209730 | -9.14 | 5.93  | 3.48E-07 | 4.64E-06 | hypothetical protein                                |
| TGME49_259090 | 1.54  | 6.78  | 3.49E-07 | 4.64E-06 | ubiquitin-conjugating enzyme subfamily protein      |
| TGME49_209280 | -4.24 | 6.12  | 3.50E-07 | 4.64E-06 | hypothetical protein                                |
| TGME49_248530 | -9.14 | 5.80  | 3.54E-07 | 4.69E-06 | FATC domain-containing protein                      |
| TGME49_258470 | 1.18  | 11.23 | 3.55E-07 | 4.70E-06 | hypothetical protein                                |
| TGME49_249650 | -9.14 | 5.91  | 3.69E-07 | 4.87E-06 | apolipoprotein A-I binding protein, putative        |
| TGME49_278975 | -2.28 | 6.87  | 3.70E-07 | 4.88E-06 | ICE family protease (caspase) p20 domain-contain    |
| TGME49_204360 | 2.57  | 6.03  | 3.72E-07 | 4.89E-06 | subtilisin SUB4                                     |
| TGME49_202572 | -9.14 | 5.64  | 3.76E-07 | 4.94E-06 | ribophorin i protein                                |
| TGME49_210230 | -9.18 | 5.90  | 3.78E-07 | 4.95E-06 | hypothetical protein                                |
| TGME49_262040 | -2.58 | 6.75  | 3.82E-07 | 4.99E-06 | SAC3/GANP family protein                            |
| TGME49_223855 | 2.71  | 6.35  | 3.94E-07 | 5.14E-06 | RNA recognition motif-containing protein            |
| TGME49_240520 | -9.14 | 5.59  | 3.97E-07 | 5.17E-06 | hypothetical protein                                |
| TGME49_221350 | -4.21 | 5.68  | 3.99E-07 | 5.18E-06 | Ctr copper transporter family protein               |
| TGME49_278700 | -3.46 | 5.93  | 4.07E-07 | 5.27E-06 | hypothetical protein                                |
| TGME49_280390 | -2.58 | 6.88  | 4.07E-07 | 5.28E-06 | HEAT repeat-containing protein                      |
| TGME49_294270 | -9.11 | 5.61  | 4.12E-07 | 5.32E-06 | histone arginine methyltransferase PRMT4/CARM       |
| TGME49_249470 | -9.11 | 5.77  | 4.12E-07 | 5.32E-06 | rhopty kinase family protein, truncated (incompl    |
| TGME49_225800 | -3.47 | 6.11  | 4.25E-07 | 5.48E-06 | iron-sulfur assembly ATPase                         |
| TGME49_282220 | 1.49  | 6.58  | 4.33E-07 | 5.56E-06 | AP2 domain transcription factor AP2VIIa-9           |
| TGME49_264600 | -2.40 | 6.95  | 4.38E-07 | 5.62E-06 | hypothetical protein                                |
| TGME49_297400 | 1.36  | 7.21  | 4.40E-07 | 5.64E-06 | hypothetical protein                                |
| TGME49_224960 | 1.35  | 7.07  | 4.43E-07 | 5.67E-06 | hypothetical protein                                |
| TGME49_251410 | -2.32 | 6.67  | 4.44E-07 | 5.67E-06 | tetratricopeptide repeat-containing protein         |
| TGME49_254870 | 1.36  | 6.87  | 4.56E-07 | 5.81E-06 | hypothetical protein                                |
| TGME49_200320 | -2.28 | 7.39  | 4.67E-07 | 5.95E-06 | hypoxanthine-xanthine-guanine phosphoribosyl tr     |
| TGME49_294550 | -1.62 | 8.00  | 4.80E-07 | 6.09E-06 | dynein heavy chain                                  |
| TGME49_318880 | 2.77  | 5.55  | 5.09E-07 | 6.44E-06 | hypothetical protein                                |
| TGME49_305240 | -3.04 | 6.60  | 5.13E-07 | 6.47E-06 | XPA binding protein 2 family protein                |
| TGME49_223800 | -4.23 | 5.96  | 5.30E-07 | 6.67E-06 | hypothetical protein                                |
| TGME49_286790 | -4.19 | 6.16  | 5.33E-07 | 6.70E-06 | nuclear factor NF2                                  |
| TGME49_316200 | 1.65  | 6.43  | 5.48E-07 | 6.87E-06 | phosphoglycerate mutase family protein              |
| TGME49_266730 | -9.08 | 5.67  | 5.53E-07 | 6.93E-06 | leucyl-tRNA synthetase (LeuRS2)                     |
| TGME49_257700 | 2.48  | 5.46  | 5.88E-07 | 7.36E-06 | hypothetical protein                                |
| TGME49_234460 | 1.47  | 6.73  | 5.90E-07 | 7.37E-06 | hypothetical protein                                |
| TGME49_236670 | 1.93  | 6.27  | 6.00E-07 | 7.47E-06 | hypothetical protein                                |
| TGME49_270140 | -9.11 | 5.48  | 6.00E-07 | 7.47E-06 | splicing factor DIM1, putative                      |
| TGME49_268760 | -1.32 | 8.36  | 6.03E-07 | 7.50E-06 | hypothetical protein                                |
| TGME49_306960 | -2.52 | 6.60  | 6.24E-07 | 7.75E-06 | phenylalanine--tRNA ligase, beta subunit protein    |
| TGME49_272770 | -4.19 | 5.80  | 6.37E-07 | 7.89E-06 | hypothetical protein                                |
| TGME49_314920 | 2.44  | 5.56  | 6.50E-07 | 8.03E-06 | hypothetical protein                                |
| TGME49_251500 | -1.41 | 8.09  | 6.52E-07 | 8.03E-06 | eukaryotic initiation factor-3, subunit 3, putative |
| TGME49_244500 | -1.77 | 7.47  | 6.51E-07 | 8.03E-06 | Tubulin-tyrosine ligase family protein              |
| TGME49_295658 | -3.40 | 6.32  | 6.59E-07 | 8.11E-06 | zinc finger in N-recogin protein                    |
| TGME49_294990 | -9.08 | 6.22  | 6.61E-07 | 8.12E-06 | hypothetical protein                                |
| TGME49_249460 | -9.08 | 5.36  | 6.67E-07 | 8.16E-06 | WD domain, G-beta repeat-containing protein         |
| TGME49_314700 | 1.38  | 7.77  | 6.72E-07 | 8.21E-06 | hypothetical protein                                |
| TGME49_236860 | -4.25 | 6.13  | 6.84E-07 | 8.34E-06 | haloacid dehalogenase family hydrolase domain-c     |
| TGME49_291020 | -2.13 | 6.79  | 6.96E-07 | 8.48E-06 | myosin head (motor domain) domain-containing p      |
| TGME49_289700 | -3.00 | 6.24  | 7.03E-07 | 8.55E-06 | hypothetical protein                                |

|               |       |       |          |          |                                                                 |
|---------------|-------|-------|----------|----------|-----------------------------------------------------------------|
| TGME49_200350 | 2.37  | 5.77  | 7.11E-07 | 8.63E-06 | subtilisin SUB3                                                 |
| TGME49_257350 | 1.19  | 8.60  | 7.33E-07 | 8.89E-06 | eukaryotic translation initiation factor, putative              |
| TGME49_301380 | -4.21 | 6.01  | 7.50E-07 | 9.07E-06 | elongation factor Tu GTP binding domain-containing protein      |
| TGME49_310140 | -9.05 | 5.76  | 7.74E-07 | 9.35E-06 | hypothetical protein                                            |
| TGME49_213325 | -9.08 | 5.93  | 7.95E-07 | 9.59E-06 | TBC domain-containing protein                                   |
| TGME49_221270 | -1.90 | 6.87  | 8.03E-07 | 9.67E-06 | oxidoreductase, 2OG-Fe(II) oxygenase family protein             |
| TGME49_227030 | -2.15 | 6.87  | 8.22E-07 | 9.88E-06 | hypothetical protein                                            |
| TGME49_215040 | -2.38 | 6.64  | 8.30E-07 | 9.96E-06 | HEAT repeat-containing protein                                  |
| TGME49_299970 | -1.47 | 8.14  | 8.33E-07 | 9.98E-06 | tetratricopeptide repeat-containing protein                     |
| TGME49_274010 | -4.16 | 6.06  | 8.35E-07 | 9.99E-06 | hypothetical protein                                            |
| TGME49_305470 | -9.05 | 5.79  | 8.83E-07 | 1.06E-05 | hypothetical protein                                            |
| TGME49_231910 | -1.73 | 7.36  | 9.13E-07 | 1.09E-05 | ATP synthase F1 gamma subunit                                   |
| TGME49_313830 | -2.96 | 6.34  | 9.16E-07 | 1.09E-05 | AARP2CN (NUC121) domain-containing protein                      |
| TGME49_228730 | -9.05 | 5.41  | 9.49E-07 | 1.13E-05 | hypothetical protein                                            |
| TGME49_257050 | -9.02 | 5.79  | 9.52E-07 | 1.13E-05 | 3-methyl-2-oxobutanoate hydroxymethyltransferase                |
| TGME49_220430 | -9.02 | 5.67  | 9.60E-07 | 1.14E-05 | hypothetical protein                                            |
| TGME49_240880 | 2.26  | 5.88  | 9.73E-07 | 1.15E-05 | hypothetical protein                                            |
| TGME49_291680 | -1.53 | 7.77  | 9.90E-07 | 1.17E-05 | Sec23/Sec24 trunk domain-containing protein                     |
| TGME49_235398 | -9.02 | 5.77  | 9.91E-07 | 1.17E-05 | hypothetical protein                                            |
| TGME49_271270 | -1.73 | 7.33  | 9.98E-07 | 1.17E-05 | hypothetical protein                                            |
| TGME49_248450 | -2.96 | 6.26  | 1.00E-06 | 1.17E-05 | zinc finger, C3HC4 type (RING finger) domain-containing protein |
| TGME49_225480 | -4.14 | 5.99  | 1.03E-06 | 1.20E-05 | hypothetical protein                                            |
| TGME49_287270 | -2.97 | 6.15  | 1.06E-06 | 1.24E-05 | hypothetical protein                                            |
| TGME49_215570 | -3.39 | 6.18  | 1.07E-06 | 1.24E-05 | AP2 domain transcription factor AP2X-11                         |
| TGME49_279340 | 1.67  | 6.26  | 1.08E-06 | 1.25E-05 | hypothetical protein                                            |
| TGME49_257490 | -3.40 | 6.62  | 1.07E-06 | 1.25E-05 | prefoldin subunit superfamily protein                           |
| TGME49_260390 | -9.02 | 5.56  | 1.08E-06 | 1.25E-05 | hypothetical protein                                            |
| TGME49_272410 | 1.37  | 6.75  | 1.09E-06 | 1.27E-05 | phosphogluconate dehydrogenase (decarboxylating)                |
| TGME49_210760 | -9.02 | 5.47  | 1.11E-06 | 1.28E-05 | glutamine amidotransferase-related, putative                    |
| TGME49_264080 | -1.51 | 8.18  | 1.11E-06 | 1.28E-05 | acyl carrier protein ACP                                        |
| TGME49_269970 | 1.29  | 6.91  | 1.13E-06 | 1.31E-05 | hypothetical protein                                            |
| TGME49_264130 | 1.98  | 5.62  | 1.14E-06 | 1.31E-05 | hypothetical protein                                            |
| TGME49_313780 | -1.63 | 7.72  | 1.14E-06 | 1.31E-05 | hypothetical protein                                            |
| TGME49_214750 | 1.30  | 7.32  | 1.14E-06 | 1.31E-05 | hypothetical protein                                            |
| TGME49_253090 | 1.71  | 5.86  | 1.15E-06 | 1.32E-05 | DEAD/DEAH box helicase domain-containing protein                |
| TGME49_306460 | -9.02 | 5.67  | 1.17E-06 | 1.34E-05 | bromodomain-containing protein                                  |
| TGME49_313020 | -3.36 | 6.61  | 1.17E-06 | 1.34E-05 | STAS domain-containing protein                                  |
| TGME49_218740 | 3.24  | 5.57  | 1.18E-06 | 1.34E-05 | membrane protein, putative                                      |
| TGME49_291050 | -1.84 | 7.12  | 1.18E-06 | 1.34E-05 | histone kinase SNF1, putative                                   |
| TGME49_219270 | -1.01 | 10.13 | 1.19E-06 | 1.35E-05 | multi-pass transmembrane protein                                |
| TGME49_310530 | -4.14 | 6.15  | 1.21E-06 | 1.37E-05 | SNF2 family N-terminal domain-containing protein                |
| TGME49_227948 | -1.31 | 8.32  | 1.21E-06 | 1.37E-05 | peptidase M16 inactive domain-containing protein                |
| TGME49_306520 | 1.91  | 7.15  | 1.22E-06 | 1.37E-05 | tRNA pseudouridine synthase B, putative                         |
| TGME49_282040 | -4.17 | 5.99  | 1.22E-06 | 1.37E-05 | hypothetical protein                                            |
| TGME49_225770 | -8.99 | 5.71  | 1.26E-06 | 1.42E-05 | Tyrosine kinase-like (TKL) protein                              |
| TGME49_205460 | -8.99 | 5.47  | 1.28E-06 | 1.44E-05 | AN1 family Zinc finger domain-containing protein                |
| TGME49_214580 | -4.14 | 5.36  | 1.29E-06 | 1.45E-05 | tetratricopeptide repeat-containing protein                     |
| TGME49_268890 | -1.88 | 7.12  | 1.32E-06 | 1.48E-05 | citrate synthase I                                              |
| TGME49_253600 | 2.37  | 6.68  | 1.33E-06 | 1.49E-05 | hypothetical protein                                            |
| TGME49_289750 | -1.06 | 9.50  | 1.34E-06 | 1.49E-05 | ribosomal-ubiquitin protein RPL40                               |
| TGME49_306310 | -2.51 | 6.64  | 1.34E-06 | 1.49E-05 | RecF/RecN/SMC N terminal domain-containing protein              |
| TGME49_290970 | -1.58 | 7.23  | 1.35E-06 | 1.50E-05 | 8-amino-7-oxononanoate synthase                                 |
| TGME49_320450 | -3.41 | 6.15  | 1.35E-06 | 1.50E-05 | ribosome biogenesis regulatory protein (rrs1) protein           |
| TGME49_243210 | 1.30  | 7.22  | 1.36E-06 | 1.51E-05 | DUF862 domain-containing protein                                |

|               |       |      |          |          |                                                    |
|---------------|-------|------|----------|----------|----------------------------------------------------|
| TGME49_243250 | -1.48 | 7.91 | 1.42E-06 | 1.58E-05 | myosin H                                           |
| TGME49_264220 | -8.99 | 5.51 | 1.43E-06 | 1.58E-05 | hypothetical protein                               |
| TGME49_234490 | -2.94 | 6.15 | 1.44E-06 | 1.59E-05 | kelch repeat-containing protein                    |
| TGME49_213400 | -2.70 | 6.41 | 1.45E-06 | 1.60E-05 | zinc finger (CCCH type) motif-containing protein   |
| TGME49_273370 | -3.09 | 6.35 | 1.46E-06 | 1.61E-05 | coatomer gamma 2-subunit protein, putative         |
| TGME49_205000 | -8.99 | 5.59 | 1.47E-06 | 1.62E-05 | phosphoglycerate mutase family protein             |
| TGME49_215430 | 1.95  | 7.91 | 1.50E-06 | 1.64E-05 | hypothetical protein                               |
| TGME49_306600 | -8.99 | 5.73 | 1.52E-06 | 1.67E-05 | RNA recognition motif-containing protein           |
| TGME49_216380 | -2.76 | 6.35 | 1.55E-06 | 1.70E-05 | phospholipid-translocating P-type ATPase, flippase |
| TGME49_213600 | -8.99 | 5.17 | 1.56E-06 | 1.70E-05 | hypothetical protein                               |
| TGME49_203350 | -9.03 | 5.69 | 1.60E-06 | 1.74E-05 | hypothetical protein                               |
| TGME49_312622 | -2.19 | 7.05 | 1.65E-06 | 1.80E-05 | DUF803 domain-containing protein                   |
| TGME49_261750 | -2.50 | 6.81 | 1.68E-06 | 1.83E-05 | rhoptry neck protein RON10                         |
| TGME49_307820 | 1.88  | 5.87 | 1.70E-06 | 1.84E-05 | hypothetical protein                               |
| TGME49_215460 | -1.44 | 9.58 | 1.72E-06 | 1.86E-05 | ribosomal protein RPS24                            |
| TGME49_221500 | -8.98 | 5.41 | 1.73E-06 | 1.87E-05 | dual specificity phosphatase, catalytic domain-con |
| TGME49_319900 | -2.01 | 7.18 | 1.73E-06 | 1.87E-05 | hypothetical protein                               |
| TGME49_206600 | -8.95 | 5.40 | 1.75E-06 | 1.89E-05 | sigma-70, region 3 protein                         |
| TGME49_213635 | 4.91  | 5.25 | 1.77E-06 | 1.90E-05 | hypothetical protein                               |
| TGME49_294400 | -2.02 | 7.26 | 1.77E-06 | 1.90E-05 | hypothetical protein                               |
| TGME49_262060 | -3.32 | 5.97 | 1.79E-06 | 1.91E-05 | hypothetical protein                               |
| TGME49_306895 | 1.23  | 7.35 | 1.80E-06 | 1.92E-05 | hypothetical protein                               |
| TGME49_245670 | -1.30 | 7.70 | 1.80E-06 | 1.92E-05 | pyruvate dehydrogenase complex subunit PDH-E1      |
| TGME49_214370 | -8.95 | 5.49 | 1.80E-06 | 1.92E-05 | hypothetical protein                               |
| TGME49_316350 | -8.98 | 5.45 | 1.85E-06 | 1.96E-05 | hypothetical protein                               |
| TGME49_297790 | -2.45 | 6.27 | 1.85E-06 | 1.96E-05 | hypothetical protein                               |
| TGME49_213620 | 2.19  | 5.49 | 1.88E-06 | 1.99E-05 | ABC1 family protein                                |
| TGME49_277685 | -9.05 | 5.11 | 1.89E-06 | 2.00E-05 | hypothetical protein                               |
| TGME49_217740 | -2.10 | 6.97 | 1.91E-06 | 2.02E-05 | 3-ketoacyl-(acyl-carrier-protein) reductase        |
| TGME49_288290 | 2.38  | 5.66 | 1.94E-06 | 2.04E-05 | hypothetical protein                               |
| TGME49_280800 | -1.79 | 7.39 | 1.94E-06 | 2.04E-05 | SWI2/SNF2 SRCAP/Ino80                              |
| TGME49_306620 | 2.54  | 6.62 | 1.95E-06 | 2.04E-05 | AP2 domain transcription factor AP2IX-9            |
| TGME49_278850 | -1.35 | 7.92 | 1.95E-06 | 2.04E-05 | DHHC zinc finger domain-containing protein         |
| TGME49_292235 | -8.95 | 5.58 | 1.97E-06 | 2.06E-05 | hypothetical protein                               |
| TGME49_271780 | -2.90 | 6.36 | 2.01E-06 | 2.10E-05 | Filamin/ABP280 repeat-containing protein           |
| TGME49_309110 | 1.53  | 6.61 | 2.03E-06 | 2.12E-05 | tRNA methyl transferase                            |
| TGME49_219485 | 1.57  | 6.92 | 2.13E-06 | 2.22E-05 | hypothetical protein                               |
| TGME49_299000 | 1.46  | 6.82 | 2.17E-06 | 2.25E-05 | hypothetical protein                               |
| TGME49_267330 | -2.42 | 6.42 | 2.20E-06 | 2.28E-05 | fumarate hydratase                                 |
| TGME49_284660 | -8.95 | 5.27 | 2.21E-06 | 2.28E-05 | mitochondrial ribosomal protein s6-2, putative     |
| TGME49_205340 | 1.16  | 9.84 | 2.26E-06 | 2.34E-05 | ribosomal protein RPS12                            |
| TGME49_266470 | -8.92 | 5.57 | 2.27E-06 | 2.35E-05 | hypothetical protein                               |
| TGME49_227450 | 1.21  | 7.22 | 2.31E-06 | 2.38E-05 | hydrolase, NUDIX family protein                    |
| TGME49_286650 | -8.92 | 5.60 | 2.32E-06 | 2.39E-05 | hypothetical protein                               |
| TGME49_290720 | -1.63 | 7.52 | 2.32E-06 | 2.39E-05 | vacuolar proton translocating ATPase subunit, put  |
| TGME49_278950 | 2.09  | 5.34 | 2.34E-06 | 2.40E-05 | LSM domain-containing protein                      |
| TGME49_239340 | -8.92 | 5.64 | 2.34E-06 | 2.40E-05 | hypothetical protein                               |
| TGME49_262930 | -8.92 | 5.80 | 2.35E-06 | 2.40E-05 | hypothetical protein                               |
| TGME49_239780 | -3.35 | 6.36 | 2.38E-06 | 2.44E-05 | hypothetical protein                               |
| TGME49_309950 | -8.92 | 5.31 | 2.38E-06 | 2.44E-05 | NLE (NUC135) domain-containing protein             |
| TGME49_285180 | -1.64 | 7.32 | 2.40E-06 | 2.44E-05 | hypothetical protein                               |
| TGME49_255250 | -8.92 | 5.45 | 2.49E-06 | 2.53E-05 | tRNA (cytosine(34)-C(5))-methyltransferase, putat  |
| TGME49_250100 | 2.61  | 6.89 | 2.55E-06 | 2.59E-05 | hypothetical protein                               |
| TGME49_231120 | 1.56  | 6.29 | 2.55E-06 | 2.59E-05 | ribosomal protein S11, putative                    |



|               |       |      |          |          |                                                           |
|---------------|-------|------|----------|----------|-----------------------------------------------------------|
| TGME49_235630 | 1.16  | 7.24 | 2.56E-06 | 2.59E-05 | hypothetical protein                                      |
| TGME49_235740 | -4.04 | 5.69 | 2.59E-06 | 2.61E-05 | hypothetical protein                                      |
| TGME49_222192 | -8.92 | 5.28 | 2.63E-06 | 2.65E-05 | hypothetical protein                                      |
| TGME49_256880 | -8.92 | 5.54 | 2.63E-06 | 2.65E-05 | protein kinase domain-containing protein                  |
| TGME49_257720 | 2.71  | 5.36 | 2.66E-06 | 2.67E-05 | proton ATPase, putative                                   |
| TGME49_245580 | 2.05  | 6.12 | 2.78E-06 | 2.78E-05 | hypothetical protein                                      |
| TGME49_233500 | 1.39  | 8.04 | 2.80E-06 | 2.80E-05 | triose-phosphate isomerase TPI-II                         |
| TGME49_214820 | 1.55  | 6.75 | 2.84E-06 | 2.84E-05 | G-patch domain-containing protein                         |
| TGME49_288340 | -8.89 | 5.69 | 2.87E-06 | 2.86E-05 | UBX domain-containing protein                             |
| TGME49_254230 | 2.06  | 5.65 | 3.00E-06 | 2.99E-05 | hypothetical protein                                      |
| TGME49_285970 | -8.88 | 5.58 | 3.01E-06 | 3.00E-05 | 30S ribosomal protein S5, putative                        |
| TGME49_222020 | -2.64 | 6.35 | 3.07E-06 | 3.05E-05 | phosphoglycerate kinase PGKII                             |
| TGME49_267340 | 2.10  | 5.19 | 3.10E-06 | 3.08E-05 | hypothetical protein                                      |
| TGME49_293440 | -1.65 | 7.35 | 3.12E-06 | 3.09E-05 | hypothetical protein                                      |
| TGME49_266890 | -1.81 | 6.92 | 3.17E-06 | 3.14E-05 | hypothetical protein                                      |
| TGME49_263540 | 2.06  | 5.09 | 3.20E-06 | 3.17E-05 | hypothetical protein                                      |
| TGME49_217688 | -8.88 | 5.67 | 3.26E-06 | 3.22E-05 | hypothetical protein                                      |
| TGME49_293860 | -8.88 | 5.58 | 3.30E-06 | 3.25E-05 | hypothetical protein                                      |
| TGME49_229380 | -8.88 | 5.38 | 3.32E-06 | 3.27E-05 | hypothetical protein                                      |
| TGME49_265220 | -4.07 | 5.88 | 3.33E-06 | 3.27E-05 | co-chaperone GrpE protein                                 |
| TGME49_209860 | -8.89 | 5.15 | 3.37E-06 | 3.31E-05 | SRP40, C-terminal domain-containing protein               |
| TGME49_204280 | 1.22  | 7.67 | 3.43E-06 | 3.36E-05 | cell-cycle-associated protein kinase DYRK, putative       |
| TGME49_216335 | 2.20  | 5.08 | 3.57E-06 | 3.49E-05 | hypothetical protein                                      |
| TGME49_316680 | 1.23  | 7.77 | 3.60E-06 | 3.50E-05 | RNA pseudouridine synthase superfamily protein            |
| TGME49_251680 | -1.35 | 8.93 | 3.59E-06 | 3.50E-05 | histamine-releasing factor, putative                      |
| TGME49_306930 | -1.41 | 7.80 | 3.59E-06 | 3.50E-05 | proteasome subunit beta type 7 precursor, putative        |
| TGME49_266400 | -8.92 | 5.57 | 3.58E-06 | 3.50E-05 | hypothetical protein                                      |
| TGME49_246460 | -4.03 | 5.93 | 3.65E-06 | 3.55E-05 | hypothetical protein                                      |
| TGME49_290900 | -8.89 | 5.86 | 3.67E-06 | 3.56E-05 | hydrolase, NUDIX family protein                           |
| TGME49_221180 | 1.10  | 8.38 | 3.67E-06 | 3.56E-05 | hypothetical protein                                      |
| TGME49_270620 | 2.33  | 6.19 | 3.80E-06 | 3.68E-05 | DEAD/DEAH box helicase domain-containing protein          |
| TGME49_320740 | -1.78 | 7.64 | 3.82E-06 | 3.69E-05 | hypothetical protein                                      |
| TGME49_202580 | 1.81  | 6.39 | 3.84E-06 | 3.71E-05 | ATPase, AAA family protein                                |
| TGME49_260620 | 1.67  | 8.06 | 3.85E-06 | 3.71E-05 | hypothetical protein                                      |
| TGME49_226600 | -2.24 | 6.43 | 4.02E-06 | 3.86E-05 | syntaxin 5, putative                                      |
| TGME49_304700 | -3.99 | 5.84 | 4.03E-06 | 3.87E-05 | hypothetical protein                                      |
| TGME49_310860 | -2.59 | 6.37 | 4.04E-06 | 3.87E-05 | U5 snRNP-specific protein                                 |
| TGME49_221590 | 1.01  | 8.78 | 4.12E-06 | 3.94E-05 | dual specificity phosphatase, catalytic domain-containing |
| TGME49_217730 | 2.08  | 5.67 | 4.14E-06 | 3.95E-05 | hypothetical protein                                      |
| TGME49_268170 | -8.95 | 5.25 | 4.15E-06 | 3.96E-05 | hypothetical protein                                      |
| TGME49_213900 | 1.20  | 7.70 | 4.17E-06 | 3.97E-05 | regulator of chromosome condensation RCC1                 |
| TGME49_230580 | -8.85 | 5.21 | 4.21E-06 | 4.00E-05 | hypothetical protein                                      |
| TGME49_304710 | -1.30 | 7.77 | 4.25E-06 | 4.03E-05 | eukaryotic peptide chain release factor, putative         |
| TGME49_253000 | 1.29  | 6.99 | 4.26E-06 | 4.04E-05 | ELMO/CED-12 family protein                                |
| TGME49_223450 | -1.94 | 6.86 | 4.29E-06 | 4.06E-05 | ubiquitin carboxyl-terminal hydrolase                     |
| TGME49_291980 | -1.59 | 7.41 | 4.32E-06 | 4.08E-05 | HECT-domain (ubiquitin-transferase) domain-containing     |
| TGME49_212960 | -8.89 | 5.30 | 4.31E-06 | 4.08E-05 | hypothetical protein                                      |
| TGME49_253100 | 1.20  | 7.16 | 4.38E-06 | 4.13E-05 | hypothetical protein                                      |
| TGME49_264730 | -8.85 | 5.36 | 4.40E-06 | 4.15E-05 | hypothetical protein                                      |
| TGME49_244530 | 1.01  | 8.53 | 4.47E-06 | 4.20E-05 | hypothetical protein                                      |
| TGME49_231980 | -8.85 | 5.84 | 4.49E-06 | 4.22E-05 | hypothetical protein                                      |
| TGME49_215260 | -1.63 | 7.22 | 4.51E-06 | 4.23E-05 | carbamoylphosphate synthetase                             |
| TGME49_253640 | 1.34  | 6.73 | 4.62E-06 | 4.33E-05 | hypothetical protein                                      |
| TGME49_268880 | -3.23 | 6.09 | 4.68E-06 | 4.38E-05 | hypothetical protein                                      |

|               |       |      |          |          |                                                    |
|---------------|-------|------|----------|----------|----------------------------------------------------|
| TGME49_292375 | 3.37  | 5.88 | 4.71E-06 | 4.40E-05 | KRUF family protein                                |
| TGME49_311870 | -2.39 | 6.63 | 4.75E-06 | 4.43E-05 | WD domain, G-beta repeat-containing protein        |
| TGME49_253360 | 1.27  | 7.00 | 4.78E-06 | 4.46E-05 | hypothetical protein                               |
| TGME49_289150 | 1.52  | 6.22 | 4.79E-06 | 4.46E-05 | hypothetical protein                               |
| TGME49_267600 | -2.83 | 6.33 | 4.83E-06 | 4.49E-05 | FHA domain-containing protein                      |
| TGME49_207665 | -8.89 | 4.98 | 4.87E-06 | 4.52E-05 | kinesin motor domain-containing protein            |
| TGME49_308880 | -8.85 | 5.26 | 4.96E-06 | 4.61E-05 | ImpB/MucB/SamB family protein                      |
| TGME49_263500 | -4.01 | 5.93 | 5.05E-06 | 4.68E-05 | vacuolar protein sorting-associated protein 26, pu |
| TGME49_219770 | -8.91 | 5.44 | 5.07E-06 | 4.69E-05 | 30S ribosomal protein S12, putative                |
| TGME49_310100 | -8.85 | 5.39 | 5.10E-06 | 4.72E-05 | mannosyltransferase (pig-m) protein                |
| TGME49_211040 | -1.31 | 8.12 | 5.27E-06 | 4.86E-05 | Sec61beta family protein                           |
| TGME49_214830 | -3.98 | 5.63 | 5.29E-06 | 4.87E-05 | hypothetical protein                               |
| TGME49_285210 | -8.90 | 5.26 | 5.29E-06 | 4.87E-05 | hypothetical protein                               |
| TGME49_313330 | -8.99 | 5.76 | 5.35E-06 | 4.91E-05 | rhoptyr kinase family protein ROP27                |
| TGME49_271760 | -8.81 | 5.72 | 5.45E-06 | 4.99E-05 | seryl-tRNA synthetase (SerRS2)                     |
| TGME49_309870 | -8.81 | 5.78 | 5.52E-06 | 5.05E-05 | hypothetical protein                               |
| TGME49_207480 | -2.36 | 6.41 | 5.58E-06 | 5.10E-05 | GCC2 and GCC3 domain-containing protein            |
| TGME49_294290 | -2.03 | 7.07 | 5.63E-06 | 5.14E-05 | Der1ER1                                            |
| TGME49_313760 | 1.01  | 8.20 | 5.66E-06 | 5.16E-05 | hypothetical protein                               |
| TGME49_264690 | -8.81 | 5.40 | 5.76E-06 | 5.24E-05 | cyclin 4, putative                                 |
| TGME49_272390 | -8.82 | 5.13 | 5.77E-06 | 5.24E-05 | hypothetical protein                               |
| TGME49_230190 | -1.99 | 6.88 | 5.92E-06 | 5.38E-05 | hypothetical protein                               |
| TGME49_209700 | -3.96 | 5.90 | 5.94E-06 | 5.39E-05 | hypothetical protein                               |
| TGME49_242800 | -1.99 | 6.66 | 6.07E-06 | 5.50E-05 | ribosome biogenesis protein NSA2, putative         |
| TGME49_252380 | 1.97  | 6.44 | 6.12E-06 | 5.54E-05 | hypothetical protein                               |
| TGME49_249610 | -2.36 | 6.80 | 6.12E-06 | 5.54E-05 | hypothetical protein                               |
| TGME49_257480 | -2.96 | 6.03 | 6.26E-06 | 5.65E-05 | NADP-dependent succinate-semialdehyde dehydr       |
| TGME49_259950 | 2.29  | 7.95 | 6.29E-06 | 5.67E-05 | carbonate dehydratase, eukaryotic-type domain-c    |
| TGME49_250950 | 2.30  | 5.35 | 6.33E-06 | 5.70E-05 | KRUF family protein                                |
| TGME49_305090 | 1.60  | 6.45 | 6.37E-06 | 5.73E-05 | kinase binding protein cgi-121 protein             |
| TGME49_264780 | -8.81 | 5.52 | 6.41E-06 | 5.75E-05 | UTP-glucose-1-phosphate uridylyltransferase subf   |
| TGME49_231030 | -3.96 | 5.64 | 6.52E-06 | 5.84E-05 | hypothetical protein                               |
| TGME49_221600 | -8.81 | 5.26 | 6.53E-06 | 5.85E-05 | hypothetical protein                               |
| TGME49_221200 | 1.50  | 7.36 | 6.60E-06 | 5.90E-05 | CW-type Zinc Finger protein                        |
| TGME49_310130 | -8.78 | 6.05 | 6.63E-06 | 5.91E-05 | Spc97 / Spc98 family protein                       |
| TGME49_271200 | -1.77 | 6.92 | 6.66E-06 | 5.93E-05 | AP2 domain transcription factor AP2VIII-5          |
| TGME49_217770 | 1.40  | 7.05 | 6.69E-06 | 5.96E-05 | hypothetical protein                               |
| TGME49_202120 | -1.56 | 7.31 | 6.76E-06 | 6.00E-05 | hypothetical protein                               |
| TGME49_289100 | -2.15 | 6.51 | 6.90E-06 | 6.12E-05 | hypothetical protein                               |
| TGME49_261400 | -1.51 | 7.86 | 7.15E-06 | 6.34E-05 | hypothetical protein                               |
| TGME49_320550 | -2.12 | 6.64 | 7.19E-06 | 6.36E-05 | hypothetical protein                               |
| TGME49_231215 | -8.78 | 5.41 | 7.19E-06 | 6.36E-05 | hypothetical protein                               |
| TGME49_205380 | -1.48 | 7.80 | 7.24E-06 | 6.39E-05 | fructose-bisphosphatase I                          |
| TGME49_220100 | -2.45 | 6.73 | 7.23E-06 | 6.39E-05 | phosphoribosylpyrophosphate synthetase             |
| TGME49_250690 | -1.08 | 8.88 | 7.33E-06 | 6.46E-05 | zinc finger (CCCH type) motif-containing protein   |
| TGME49_318330 | -8.77 | 5.85 | 7.34E-06 | 6.46E-05 | histone lysine acetyltransferase MYST-A            |
| TGME49_227930 | 1.20  | 7.02 | 7.47E-06 | 6.56E-05 | hypothetical protein                               |
| TGME49_321440 | -1.30 | 7.84 | 7.54E-06 | 6.60E-05 | SWI2/SNF2 ISWI-like SANT                           |
| TGME49_202950 | -1.45 | 7.30 | 7.55E-06 | 6.60E-05 | hypothetical protein                               |
| TGME49_300290 | -8.80 | 5.41 | 7.65E-06 | 6.67E-05 | SNARE domain-containing protein                    |
| TGME49_249030 | 1.25  | 7.46 | 7.66E-06 | 6.67E-05 | endonuclease/exonuclease/phosphatase family p      |
| TGME49_280380 | 1.22  | 9.89 | 7.82E-06 | 6.80E-05 | poly(ADP-ribose) glycohydrolase                    |
| TGME49_311460 | -2.88 | 6.70 | 7.84E-06 | 6.81E-05 | hypothetical protein                               |
| TGME49_261620 | 1.56  | 5.83 | 7.91E-06 | 6.87E-05 | hypothetical protein                               |

|               |       |      |          |          |                                                   |
|---------------|-------|------|----------|----------|---------------------------------------------------|
| TGME49_219070 | 1.18  | 7.52 | 8.17E-06 | 7.07E-05 | cyclic nucleotide-binding domain-containing prote |
| TGME49_310010 | -1.27 | 8.26 | 8.17E-06 | 7.07E-05 | rhopty neck protein RON1                          |
| TGME49_237830 | -8.77 | 5.84 | 8.17E-06 | 7.07E-05 | DNA polymerase I domain-containing protein        |
| TGME49_251800 | 1.68  | 5.67 | 8.21E-06 | 7.09E-05 | hypothetical protein                              |
| TGME49_213790 | -2.78 | 6.32 | 8.24E-06 | 7.11E-05 | hypothetical protein                              |
| TGME49_219310 | -1.41 | 8.62 | 8.35E-06 | 7.19E-05 | DnaK family protein                               |
| TGME49_240300 | -8.80 | 5.18 | 8.38E-06 | 7.21E-05 | zinc finger domain, LSD1 subclass domain-contain  |
| TGME49_298830 | 1.64  | 6.26 | 8.58E-06 | 7.38E-05 | hypothetical protein                              |
| TGME49_236570 | -1.26 | 7.93 | 8.59E-06 | 7.38E-05 | lysine decarboxylase family protein               |
| TGME49_289570 | 1.04  | 7.68 | 8.74E-06 | 7.50E-05 | phosphatidylinositol transfer protein             |
| TGME49_266970 | -3.21 | 5.89 | 8.80E-06 | 7.53E-05 | hypothetical protein                              |
| TGME49_231130 | -8.74 | 5.70 | 8.82E-06 | 7.54E-05 | hypothetical protein                              |
| TGME49_252340 | 1.57  | 7.56 | 8.93E-06 | 7.62E-05 | hypothetical protein                              |
| TGME49_240540 | -2.36 | 6.41 | 8.95E-06 | 7.63E-05 | hypothetical protein                              |
| TGME49_209820 | -8.77 | 5.29 | 9.04E-06 | 7.69E-05 | syntaxin protein                                  |
| TGME49_318410 | -1.38 | 7.53 | 9.12E-06 | 7.75E-05 | TCP-1 chaperonin, putative                        |
| TGME49_246800 | -1.79 | 6.81 | 9.20E-06 | 7.81E-05 | acylaminoacyl-peptidase, putative                 |
| TGME49_319640 | 1.06  | 8.46 | 9.25E-06 | 7.84E-05 | hypothetical protein                              |
| TGME49_263040 | -1.10 | 9.58 | 9.30E-06 | 7.87E-05 | ribosomal protein RPS16                           |
| TGME49_297420 | -3.92 | 5.82 | 9.32E-06 | 7.88E-05 | beta-tubulin cofactor D, putative                 |
| TGME49_264840 | -8.74 | 5.33 | 9.59E-06 | 8.09E-05 | ATP-dependent DNA helicase, RecQ family protein   |
| TGME49_237000 | -3.90 | 5.99 | 9.62E-06 | 8.11E-05 | polyphosphoinositide binding protein, putative    |
| TGME49_237530 | -8.74 | 5.45 | 9.68E-06 | 8.15E-05 | hypothetical protein                              |
| TGME49_280410 | -1.95 | 6.69 | 9.72E-06 | 8.18E-05 | 3'5'-cyclic nucleotide phosphodiesterase domain-c |
| TGME49_290940 | -1.57 | 7.21 | 9.87E-06 | 8.29E-05 | EMP/nonaspanin domain family protein              |
| TGME49_250115 | 1.14  | 7.97 | 9.96E-06 | 8.34E-05 | hypothetical protein                              |
| TGME49_286750 | -1.46 | 7.53 | 9.98E-06 | 8.34E-05 | MA3 domain-containing protein                     |
| TGME49_270800 | -3.97 | 6.03 | 9.98E-06 | 8.34E-05 | GAF domain-containing protein                     |
| TGME49_223690 | -8.74 | 5.06 | 9.94E-06 | 8.34E-05 | hypothetical protein                              |
| TGME49_253320 | -8.74 | 4.96 | 9.99E-06 | 8.34E-05 | hypothetical protein                              |
| TGME49_217020 | -3.37 | 6.25 | 1.02E-05 | 8.48E-05 | ATPase, AFG1 family protein                       |
| TGME49_306470 | -2.49 | 6.39 | 1.02E-05 | 8.50E-05 | isoprenylcysteine carboxyl methyltransferase (icm |
| TGME49_314280 | 2.69  | 5.65 | 1.04E-05 | 8.61E-05 | AAR2 protein                                      |
| TGME49_225690 | -1.29 | 8.01 | 1.04E-05 | 8.61E-05 | hypothetical protein                              |
| TGME49_292950 | -1.21 | 7.64 | 1.05E-05 | 8.67E-05 | hypothetical protein                              |
| TGME49_236550 | -1.37 | 7.92 | 1.05E-05 | 8.67E-05 | hypothetical protein                              |
| TGME49_226260 | 1.11  | 7.26 | 1.08E-05 | 8.92E-05 | hypothetical protein                              |
| TGME49_224600 | -3.90 | 5.60 | 1.09E-05 | 9.03E-05 | GTP binding protein                               |
| TGME49_216410 | -8.82 | 5.36 | 1.09E-05 | 9.04E-05 | hypothetical protein                              |
| TGME49_224310 | -8.76 | 5.58 | 1.10E-05 | 9.04E-05 | DHHC zinc finger domain-containing protein        |
| TGME49_275755 | 2.14  | 4.98 | 1.10E-05 | 9.08E-05 | hypothetical protein                              |
| TGME49_312330 | -1.16 | 7.74 | 1.11E-05 | 9.10E-05 | hypothetical protein                              |
| TGME49_219820 | -1.23 | 7.72 | 1.12E-05 | 9.19E-05 | polyubiquitin UbC, putative                       |
| TGME49_231180 | 1.62  | 6.18 | 1.14E-05 | 9.36E-05 | hypothetical protein                              |
| TGME49_261970 | 1.26  | 7.59 | 1.15E-05 | 9.41E-05 | hypothetical protein                              |
| TGME49_212140 | -4.01 | 6.11 | 1.15E-05 | 9.41E-05 | hypothetical protein                              |
| TGME49_314730 | -3.90 | 5.86 | 1.15E-05 | 9.42E-05 | ALG6, ALG8 glycosyltransferase family protein     |
| TGME49_297810 | -1.39 | 7.88 | 1.16E-05 | 9.45E-05 | hypothetical protein                              |
| TGME49_238950 | -1.54 | 9.10 | 1.17E-05 | 9.54E-05 | fatty acyl-CoA desaturase, putative               |
| TGME49_294980 | 2.12  | 6.35 | 1.18E-05 | 9.63E-05 | hypothetical protein                              |
| TGME49_292975 | -3.16 | 6.05 | 1.19E-05 | 9.66E-05 | hypothetical protein                              |
| TGME49_312860 | -3.18 | 5.92 | 1.20E-05 | 9.81E-05 | hypothetical protein                              |
| TGME49_268600 | -3.13 | 5.84 | 1.21E-05 | 9.83E-05 | DNA polymerase epsilon subunit B protein          |
| TGME49_264860 | -3.88 | 5.69 | 1.21E-05 | 9.84E-05 | zinc finger, C3HC4 type (RING finger) domain-cont |

|               |       |      |          |             |                                                       |
|---------------|-------|------|----------|-------------|-------------------------------------------------------|
| TGME49_270900 | -3.25 | 6.04 | 1.23E-05 | 9.98E-05    | ATPase, AAA family protein                            |
| TGME49_269670 | -3.14 | 5.91 | 1.23E-05 | 1.00E-04    | hypothetical protein                                  |
| TGME49_219800 | -1.19 | 8.18 | 1.23E-05 | 0.000100012 | vacuolar ATP synthase subunit b, putative             |
| TGME49_235490 | -1.71 | 7.03 | 1.25E-05 | 0.000100719 | hypothetical protein                                  |
| TGME49_312650 | 2.16  | 6.55 | 1.25E-05 | 0.000100075 | hypothetical protein                                  |
| TGME49_244720 | -3.87 | 5.51 | 1.25E-05 | 0.000100075 | hypothetical protein                                  |
| TGME49_233410 | 1.71  | 5.64 | 1.25E-05 | 0.000100096 | Sof1 family domain-containing protein                 |
| TGME49_208200 | -3.90 | 5.78 | 1.27E-05 | 0.000102014 | PHD-finger domain-containing protein                  |
| TGME49_205558 | -1.08 | 8.48 | 1.29E-05 | 0.000103284 | NAC domain-containing protein                         |
| TGME49_256770 | -1.33 | 7.59 | 1.28E-05 | 0.000103284 | eukaryotic translation initiation factor 4A, isoform  |
| TGME49_225160 | 1.17  | 7.43 | 1.29E-05 | 0.000103493 | hypothetical protein                                  |
| TGME49_216120 | -2.30 | 6.42 | 1.29E-05 | 0.000103645 | hypothetical protein                                  |
| TGME49_272270 | -8.70 | 4.79 | 1.29E-05 | 0.000103645 | radical SAM domain-containing protein                 |
| TGME49_264140 | -1.79 | 7.26 | 1.30E-05 | 0.000104062 | hypothetical protein                                  |
| TGME49_207770 | -1.45 | 7.77 | 1.34E-05 | 0.000107114 | PCI domain-containing protein                         |
| TGME49_202280 | -3.93 | 5.77 | 1.35E-05 | 0.000107471 | WD domain, G-beta repeat-containing protein           |
| TGME49_310850 | -8.75 | 5.31 | 1.37E-05 | 0.000109333 | MYND finger domain-containing protein                 |
| TGME49_223780 | -1.90 | 6.75 | 1.38E-05 | 0.000109799 | hypothetical protein                                  |
| TGME49_275350 | -2.29 | 6.21 | 1.38E-05 | 0.000109805 | TBC domain-containing protein                         |
| TGME49_270580 | -8.69 | 5.66 | 1.39E-05 | 0.000109868 | HECT-domain (ubiquitin-transferase) domain-cont       |
| TGME49_253850 | 2.01  | 5.06 | 1.40E-05 | 0.000110606 | hypothetical protein                                  |
| TGME49_252310 | -2.02 | 6.41 | 1.40E-05 | 0.000110736 | hypothetical protein                                  |
| TGME49_289310 | -2.17 | 6.67 | 1.42E-05 | 0.000112488 | cullin family protein                                 |
| TGME49_222060 | -2.57 | 5.98 | 1.43E-05 | 0.000113006 | hypothetical protein                                  |
| TGME49_310230 | -8.70 | 5.63 | 1.44E-05 | 0.000113172 | hypothetical protein                                  |
| TGME49_306530 | -8.70 | 5.01 | 1.46E-05 | 0.000114861 | hypothetical protein                                  |
| TGME49_276930 | 1.21  | 7.83 | 1.46E-05 | 0.000114975 | hypothetical protein                                  |
| TGME49_259520 | -8.69 | 5.47 | 1.47E-05 | 0.0001151   | hypothetical protein                                  |
| TGME49_210390 | -8.74 | 5.21 | 1.46E-05 | 0.0001151   | WD domain, G-beta repeat-containing protein           |
| TGME49_246230 | -8.73 | 5.20 | 1.47E-05 | 0.000115201 | hypothetical protein                                  |
| TGME49_307010 | 2.11  | 6.89 | 1.48E-05 | 0.000116312 | histone lysine demethylase JMJC1/KDM5D/JARID1         |
| TGME49_258670 | -8.78 | 5.62 | 1.51E-05 | 0.000117933 | hypothetical protein                                  |
| TGME49_294830 | -2.83 | 6.45 | 1.51E-05 | 0.00011794  | methyltransferase domain-containing protein           |
| TGME49_315600 | -8.73 | 5.50 | 1.54E-05 | 0.000119998 | MCM2/3/5 family protein                               |
| TGME49_315860 | -2.13 | 6.65 | 1.60E-05 | 0.000124734 | EF hand domain-containing protein                     |
| TGME49_260320 | -2.72 | 6.27 | 1.61E-05 | 0.000124902 | Noc2p family protein                                  |
| TGME49_214770 | -1.22 | 7.90 | 1.68E-05 | 0.000130724 | small GTP binding protein rab1a, putative             |
| TGME49_294705 | -8.71 | 5.03 | 1.68E-05 | 0.000130724 | hypothetical protein                                  |
| TGME49_211630 | 1.02  | 8.47 | 1.69E-05 | 0.000131182 | hypothetical protein                                  |
| TGME49_255890 | -3.11 | 5.76 | 1.69E-05 | 0.000131182 | pyridine nucleotide-disulfide oxidoreductase dom      |
| TGME49_292140 | 1.08  | 7.59 | 1.70E-05 | 0.000131776 | NIMA-related protein kinase NIMA1                     |
| TGME49_202620 | 1.02  | 8.38 | 1.71E-05 | 0.000131776 | hypothetical protein                                  |
| TGME49_290580 | -3.84 | 6.04 | 1.71E-05 | 0.000132033 | ATP-binding cassette G family transporter ABCG89      |
| TGME49_223150 | -8.66 | 5.15 | 1.72E-05 | 0.000132172 | START domain-containing protein                       |
| TGME49_319312 | 2.20  | 5.71 | 1.73E-05 | 0.000132784 | hypothetical protein                                  |
| TGME49_243580 | -2.65 | 7.20 | 1.73E-05 | 0.000132847 | Hit family protein involved in cell-cycle regulation, |
| TGME49_201900 | -3.84 | 5.71 | 1.74E-05 | 0.000133059 | hypothetical protein                                  |
| TGME49_243960 | -1.04 | 8.61 | 1.77E-05 | 0.00013561  | nuclear transport factor 2 (ntf2) domain-containin    |
| TGME49_255700 | -1.94 | 7.07 | 1.85E-05 | 0.000141114 | hypothetical protein                                  |
| TGME49_207180 | -8.69 | 5.29 | 1.87E-05 | 0.000142833 | indole-3-glycerol phosphate synthase domain-con       |
| TGME49_292330 | 1.20  | 7.38 | 1.89E-05 | 0.000143721 | hypothetical protein                                  |
| TGME49_208970 | -1.83 | 6.92 | 1.89E-05 | 0.000143777 | RNA recognition motif-containing protein              |
| TGME49_264090 | -3.12 | 6.14 | 1.89E-05 | 0.000143777 | hypothetical protein                                  |
| TGME49_224020 | 1.43  | 6.33 | 1.90E-05 | 0.000144672 | hypothetical protein                                  |

|               |       |      |          |             |                                                             |
|---------------|-------|------|----------|-------------|-------------------------------------------------------------|
| TGME49_293380 | -8.69 | 5.33 | 1.91E-05 | 0.000144672 | histone lysine acetyltransferase HAT1                       |
| TGME49_216390 | -3.08 | 5.89 | 1.92E-05 | 0.000145243 | RNA methyltransferase, TrmH family protein                  |
| TGME49_249410 | -2.51 | 6.04 | 1.92E-05 | 0.00014565  | hypothetical protein                                        |
| TGME49_258230 | -3.05 | 5.91 | 1.93E-05 | 0.00014565  | roptry kinase family protein ROP20                          |
| TGME49_229370 | -3.81 | 5.92 | 1.93E-05 | 0.00014565  | AP2 domain transcription factor AP2VIII-1                   |
| TGME49_278440 | -1.90 | 6.87 | 1.94E-05 | 0.000146332 | SWI2/SNF2 Brahma-like putative                              |
| TGME49_278930 | -2.03 | 6.40 | 1.94E-05 | 0.000146332 | Tubulin-tyrosine ligase family protein                      |
| TGME49_313270 | -1.48 | 7.49 | 1.94E-05 | 0.000146449 | hypothetical protein                                        |
| TGME49_203358 | -3.84 | 5.46 | 1.97E-05 | 0.000147909 | hypothetical protein                                        |
| TGME49_252190 | 2.27  | 6.80 | 1.98E-05 | 0.000148732 | KRUF family protein                                         |
| TGME49_291140 | -1.15 | 8.46 | 1.98E-05 | 0.00014894  | CCR4-Not complex component, Not1 protein                    |
| TGME49_251885 | -8.67 | 5.07 | 1.99E-05 | 0.000149224 | hypothetical protein                                        |
| TGME49_296015 | 1.63  | 6.18 | 2.00E-05 | 0.00014945  | hypothetical protein                                        |
| TGME49_310910 | -8.67 | 5.61 | 2.00E-05 | 0.00014945  | WD domain, G-beta repeat-containing protein                 |
| TGME49_249790 | -3.81 | 5.87 | 2.02E-05 | 0.000150697 | hypothetical protein                                        |
| TGME49_269150 | -8.65 | 5.14 | 2.02E-05 | 0.000151215 | DHHC zinc finger domain-containing protein                  |
| TGME49_300250 | 1.02  | 7.59 | 2.08E-05 | 0.000154394 | MtN3/saliva family protein                                  |
| TGME49_216630 | -8.62 | 5.35 | 2.08E-05 | 0.000154462 | trigger factor protein, putative                            |
| TGME49_207800 | -8.62 | 5.28 | 2.09E-05 | 0.00015503  | hypothetical protein                                        |
| TGME49_218240 | -1.16 | 8.12 | 2.09E-05 | 0.000155188 | hypothetical protein                                        |
| TGME49_227320 | -8.71 | 5.44 | 2.10E-05 | 0.00015546  | hypothetical protein                                        |
| TGME49_222290 | -3.81 | 5.85 | 2.13E-05 | 0.000157795 | LSM domain-containing protein                               |
| TGME49_225060 | -2.43 | 6.46 | 2.16E-05 | 0.000159519 | nucleoredoxin family protein                                |
| TGME49_221295 | -3.81 | 5.92 | 2.16E-05 | 0.000159519 | hypothetical protein                                        |
| TGME49_285950 | -8.68 | 5.02 | 2.17E-05 | 0.000159663 | hypothetical protein                                        |
| TGME49_245590 | 2.04  | 5.36 | 2.17E-05 | 0.000159691 | rhomboid protease ROM6                                      |
| TGME49_228130 | 1.71  | 6.56 | 2.18E-05 | 0.000160344 | hypothetical protein                                        |
| TGME49_251850 | -1.68 | 7.02 | 2.20E-05 | 0.000161559 | serine/threonine protein phosphatase                        |
| TGME49_215660 | -8.62 | 5.03 | 2.20E-05 | 0.000161559 | hypothetical protein                                        |
| TGME49_216170 | -3.96 | 5.73 | 2.22E-05 | 0.000162772 | SufS subfamily cysteine desulfurase                         |
| TGME49_229490 | -2.69 | 6.21 | 2.24E-05 | 0.000164289 | tetratricopeptide repeat-containing protein                 |
| TGME49_268900 | -8.61 | 5.16 | 2.28E-05 | 0.00016648  | dense granular protein GRA10                                |
| TGME49_308060 | -2.51 | 6.56 | 2.34E-05 | 0.000170857 | hypothetical protein                                        |
| TGME49_305930 | 2.60  | 4.79 | 2.35E-05 | 0.000171253 | hypothetical protein                                        |
| TGME49_293500 | 2.16  | 5.56 | 2.35E-05 | 0.000171458 | hypothetical protein                                        |
| TGME49_310270 | -3.88 | 5.89 | 2.36E-05 | 0.00017172  | hypothetical protein                                        |
| TGME49_277910 | 1.20  | 6.76 | 2.40E-05 | 0.000174709 | thrombospondin type 1 domain-containing protein             |
| TGME49_289670 | 2.63  | 4.94 | 2.43E-05 | 0.000176644 | DNA repair metallo-beta-lactamase                           |
| TGME49_229500 | -3.78 | 5.70 | 2.49E-05 | 0.000180675 | hypothetical protein                                        |
| TGME49_212840 | -8.67 | 5.13 | 2.55E-05 | 0.000184771 | HIT zinc finger protein                                     |
| TGME49_294812 | -3.81 | 5.19 | 2.57E-05 | 0.000185762 | RNA recognition motif-containing protein                    |
| TGME49_227010 | -8.72 | 5.24 | 2.58E-05 | 0.00018657  | roptry kinase family protein ROP30                          |
| TGME49_310670 | -1.23 | 7.93 | 2.58E-05 | 0.000186599 | glycogen phosphorylase 1, putative                          |
| TGME49_231480 | -1.54 | 7.27 | 2.59E-05 | 0.000186611 | GCN1, putative                                              |
| TGME49_230950 | -8.61 | 5.62 | 2.61E-05 | 0.000187953 | hypothetical protein                                        |
| TGME49_243298 | -8.61 | 5.50 | 2.61E-05 | 0.000187953 | ICE family protease (caspase) p20 domain-containing protein |
| TGME49_234190 | -1.19 | 8.32 | 2.65E-05 | 0.000190321 | serine hydroxymethyltransferase 2, putative                 |
| TGME49_203060 | 1.16  | 7.36 | 2.66E-05 | 0.000191007 | hypothetical protein                                        |
| TGME49_295420 | 1.41  | 7.87 | 2.68E-05 | 0.00019235  | hypothetical protein                                        |
| TGME49_233340 | -2.45 | 6.12 | 2.68E-05 | 0.00019235  | hypothetical protein                                        |
| TGME49_210980 | 1.49  | 6.94 | 2.72E-05 | 0.000194768 | alternative splicing type 3 and, putative                   |
| TGME49_270050 | 1.87  | 5.58 | 2.73E-05 | 0.000195219 | hypothetical protein                                        |
| TGME49_226900 | 1.66  | 6.03 | 2.74E-05 | 0.000195277 | hypothetical protein                                        |
| TGME49_293730 | -1.72 | 7.07 | 2.74E-05 | 0.000195277 | DHHC zinc finger domain-containing protein                  |

|               |       |      |          |             |                                                      |
|---------------|-------|------|----------|-------------|------------------------------------------------------|
| TGME49_270090 | -3.06 | 6.03 | 2.74E-05 | 0.000195277 | hypothetical protein                                 |
| TGME49_318575 | -8.61 | 5.22 | 2.74E-05 | 0.000195277 | hypothetical protein                                 |
| TGME49_222940 | 3.27  | 5.07 | 2.77E-05 | 0.000196882 | hypothetical protein                                 |
| TGME49_316900 | -1.89 | 6.55 | 2.77E-05 | 0.000196909 | Sas10 C-terminal domain-containing protein           |
| TGME49_239720 | -8.57 | 5.49 | 2.78E-05 | 0.000197474 | 50S ribosomal protein l24, putative                  |
| TGME49_299900 | -8.57 | 5.26 | 2.79E-05 | 0.000197679 | hypothetical protein                                 |
| TGME49_204380 | -1.66 | 6.95 | 2.80E-05 | 0.000198042 | hypothetical protein                                 |
| TGME49_263270 | -1.32 | 7.15 | 2.85E-05 | 0.000200948 | glycerophosphodiester phosphodiesterase family       |
| TGME49_290890 | -2.41 | 6.43 | 2.84E-05 | 0.000200948 | carbonyl reductase 1, putative                       |
| TGME49_310570 | -8.66 | 5.49 | 2.86E-05 | 0.000201889 | hypothetical protein                                 |
| TGME49_217870 | 1.24  | 6.94 | 2.87E-05 | 0.000202167 | DHHC zinc finger domain-containing protein           |
| TGME49_306910 | -2.21 | 6.36 | 2.87E-05 | 0.000202167 | hypothetical protein                                 |
| TGME49_290740 | -8.60 | 4.96 | 2.87E-05 | 0.000202167 | hypothetical protein                                 |
| TGME49_309100 | 2.42  | 5.47 | 2.93E-05 | 0.000205546 | hypothetical protein                                 |
| TGME49_223640 | -8.67 | 5.20 | 2.97E-05 | 0.000208381 | hypothetical protein                                 |
| TGME49_310300 | -3.06 | 5.65 | 3.00E-05 | 0.00021024  | hypothetical protein                                 |
| TGME49_291030 | -3.82 | 5.60 | 3.04E-05 | 0.000212625 | zinc finger, C3HC4 type (RING finger) domain-cont    |
| TGME49_244510 | -8.57 | 4.91 | 3.04E-05 | 0.000212859 | AP2 domain transcription factor AP2VI-3              |
| TGME49_310590 | 1.88  | 5.32 | 3.07E-05 | 0.000214098 | hypothetical protein                                 |
| TGME49_262980 | -8.57 | 5.23 | 3.12E-05 | 0.000217676 | hypothetical protein                                 |
| TGME49_249950 | -3.06 | 5.46 | 3.15E-05 | 0.000219437 | Mak16 protein                                        |
| TGME49_219250 | 1.08  | 7.49 | 3.17E-05 | 0.000220177 | acetyltransferase, GNAT family protein               |
| TGME49_275310 | -3.06 | 5.96 | 3.18E-05 | 0.000220694 | hypothetical protein                                 |
| TGME49_285780 | -8.61 | 5.31 | 3.18E-05 | 0.000220708 | hypothetical protein                                 |
| TGME49_268430 | -3.80 | 5.49 | 3.19E-05 | 0.0002214   | hypothetical protein                                 |
| TGME49_300020 | -3.75 | 5.75 | 3.22E-05 | 0.000222696 | ATP-dependent metalloproteinase HflB subfamily p     |
| TGME49_313350 | -3.75 | 5.75 | 3.22E-05 | 0.000222696 | hypothetical protein                                 |
| TGME49_229290 | -8.59 | 4.73 | 3.24E-05 | 0.000224035 | kelch repeat-containing protein                      |
| TGME49_258480 | -1.88 | 6.81 | 3.27E-05 | 0.000225612 | hypothetical protein                                 |
| TGME49_310710 | -3.75 | 5.64 | 3.34E-05 | 0.000229945 | small ribosomal subunit Rsm22 protein                |
| TGME49_230000 | 1.49  | 6.52 | 3.34E-05 | 0.00022996  | hypothetical protein                                 |
| TGME49_295015 | 1.87  | 5.56 | 3.35E-05 | 0.000230524 | patched family protein                               |
| TGME49_272640 | -2.08 | 6.34 | 3.36E-05 | 0.000230713 | eukaryotic initiation factor-2B, epsilon subunit, pu |
| TGME49_208820 | -3.81 | 5.82 | 3.36E-05 | 0.000230733 | 1-deoxy-D-xylulose-5-phosphate synthase              |
| TGME49_222920 | -2.21 | 6.07 | 3.38E-05 | 0.000231666 | mbp-1 interacting protein-2a family protein          |
| TGME49_232160 | 1.18  | 6.85 | 3.38E-05 | 0.000231731 | zinc finger, C3HC4 type (RING finger) domain-cont    |
| TGME49_245485 | 1.89  | 6.56 | 3.39E-05 | 0.000232185 | microneme protein MIC9                               |
| TGME49_243490 | -8.57 | 5.07 | 3.39E-05 | 0.000232185 | BCS1 family isoform 9, putative                      |
| TGME49_249560 | -8.58 | 5.35 | 3.43E-05 | 0.000234728 | DNA-directed RNA polymerase alpha chain rpoA         |
| TGME49_289290 | -1.79 | 7.07 | 3.44E-05 | 0.000234926 | hypothetical protein                                 |
| TGME49_244000 | -8.57 | 5.35 | 3.45E-05 | 0.000235471 | DEAD/DEAH box helicase domain-containing prote       |
| TGME49_285990 | -3.82 | 5.64 | 3.47E-05 | 0.000236443 | Filamin/ABP280 repeat-containing protein             |
| TGME49_260580 | -2.07 | 6.60 | 3.53E-05 | 0.000240346 | hypothetical protein                                 |
| TGME49_296340 | 3.34  | 5.35 | 3.54E-05 | 0.000241088 | hypothetical protein                                 |
| TGME49_256030 | -1.17 | 7.94 | 3.58E-05 | 0.000243376 | hypothetical protein                                 |
| TGME49_263410 | 6.14  | 5.00 | 3.62E-05 | 0.000245753 | scavenger receptor cysteine-rich domain-containi     |
| TGME49_249698 | -8.60 | 4.98 | 3.62E-05 | 0.000245873 | hypothetical protein                                 |
| TGME49_255740 | -3.07 | 5.77 | 3.64E-05 | 0.000246494 | hypothetical protein                                 |
| TGME49_235960 | -8.56 | 4.72 | 3.64E-05 | 0.000246494 | hypothetical protein                                 |
| TGME49_248570 | -3.80 | 5.72 | 3.65E-05 | 0.00024679  | hypothetical protein                                 |
| TGME49_268220 | 9.62  | 5.12 | 3.67E-05 | 0.000247768 | hypothetical protein                                 |
| TGME49_221440 | -8.58 | 5.45 | 3.68E-05 | 0.000248083 | RPGR, putative                                       |
| TGME49_259850 | -8.53 | 5.08 | 3.71E-05 | 0.000250141 | hypothetical protein                                 |
| TGME49_240370 | 6.91  | 4.77 | 3.75E-05 | 0.00025251  | Toxoplasma gondii family E protein                   |

|               |       |      |          |             |                                                   |
|---------------|-------|------|----------|-------------|---------------------------------------------------|
| TGME49_248150 | -3.75 | 5.73 | 3.76E-05 | 0.000252712 | hypothetical protein                              |
| TGME49_243340 | -8.53 | 5.12 | 3.76E-05 | 0.000252712 | atypical MEK-related kinase (incomplete catalytic |
| TGME49_209130 | -8.53 | 5.70 | 3.77E-05 | 0.00025311  | regulator of chromosome condensation (RCC1) re    |
| TGME49_239830 | -1.38 | 8.16 | 3.79E-05 | 0.000254401 | TBC domain-containing protein                     |
| TGME49_221585 | -8.57 | 5.10 | 3.82E-05 | 0.000255639 | hypothetical protein                              |
| TGME49_242870 | -8.53 | 5.35 | 3.82E-05 | 0.000255919 | histone lysine methyltransferase, SET, putative   |
| TGME49_227115 | -8.53 | 5.08 | 3.83E-05 | 0.000256078 | hypothetical protein                              |
| TGME49_304900 | -1.22 | 7.73 | 3.88E-05 | 0.000258867 | hypothetical protein                              |
| TGME49_269130 | -8.53 | 4.83 | 3.93E-05 | 0.000262362 | hypothetical protein                              |
| TGME49_228490 | -2.63 | 6.14 | 3.94E-05 | 0.000262479 | hypothetical protein                              |
| TGME49_261650 | -1.52 | 7.04 | 3.94E-05 | 0.000262778 | hypothetical protein                              |
| TGME49_304470 | -3.00 | 5.83 | 3.95E-05 | 0.000263008 | oxidoreductase, putative                          |
| TGME49_283790 | -1.57 | 7.20 | 3.97E-05 | 0.000263656 | protein kinase, putative                          |
| TGME49_280720 | -8.53 | 5.01 | 3.99E-05 | 0.000265021 | hypothetical protein                              |
| TGME49_212860 | 1.22  | 6.72 | 4.03E-05 | 0.000267184 | hypothetical protein                              |
| TGME49_240460 | -3.00 | 5.64 | 4.03E-05 | 0.000267184 | AP2 domain transcription factor AP2VI-1           |
| TGME49_279430 | -2.66 | 6.25 | 4.16E-05 | 0.000274951 | cbf18 pre-mRNA splicing factor protein            |
| TGME49_281510 | -3.01 | 6.07 | 4.16E-05 | 0.000274951 | ribonuclease H1 large subunit, putative           |
| TGME49_213460 | 2.47  | 7.06 | 4.21E-05 | 0.000277641 | hypothetical protein                              |
| TGME49_239560 | -8.60 | 5.38 | 4.23E-05 | 0.000278662 | myosin E                                          |
| TGME49_285260 | 2.21  | 4.95 | 4.24E-05 | 0.000278976 | hypothetical protein                              |
| TGME49_313360 | 1.44  | 6.20 | 4.32E-05 | 0.000284277 | hypothetical protein                              |
| TGME49_247300 | 1.01  | 8.35 | 4.36E-05 | 0.000286054 | hypothetical protein                              |
| TGME49_256840 | -3.72 | 5.96 | 4.36E-05 | 0.000286054 | hypothetical protein                              |
| TGME49_259530 | -3.72 | 5.96 | 4.36E-05 | 0.000286054 | GalNac                                            |
| TGME49_311500 | -8.58 | 5.49 | 4.37E-05 | 0.000286758 | ThiF family protein                               |
| TGME49_251840 | 1.29  | 6.35 | 4.39E-05 | 0.000287671 | hypothetical protein                              |
| TGME49_250220 | 2.17  | 5.45 | 4.42E-05 | 0.000288498 | hypothetical protein                              |
| TGME49_216130 | -1.94 | 6.73 | 4.41E-05 | 0.000288498 | ubiquitin conjugating enzyme E2, putative         |
| TGME49_278130 | -2.14 | 6.84 | 4.41E-05 | 0.000288498 | hypothetical protein                              |
| TGME49_293460 | -3.75 | 5.22 | 4.42E-05 | 0.000288514 | ATP-dependent DNA ligase domain-containing pro    |
| TGME49_308990 | -3.72 | 5.30 | 4.44E-05 | 0.000289666 | transporter, solute:sodium symporter (SSS) family |
| TGME49_248790 | 2.18  | 5.02 | 4.52E-05 | 0.00029452  | hypothetical protein                              |
| TGME49_227140 | 2.65  | 4.81 | 4.54E-05 | 0.000295421 | hypothetical protein                              |
| TGME49_250830 | -1.53 | 7.32 | 4.54E-05 | 0.000295421 | SAC3/GANP family protein                          |
| TGME49_305560 | -3.72 | 5.81 | 4.63E-05 | 0.000300682 | Vps51/Vps67 protein                               |
| TGME49_300048 | 1.07  | 7.17 | 4.64E-05 | 0.000301136 | hypothetical protein                              |
| TGME49_263290 | 2.97  | 6.06 | 4.72E-05 | 0.000305325 | rhomoid protease ROM2                             |
| TGME49_286560 | -8.57 | 5.40 | 4.78E-05 | 0.000308454 | U6 snRNA-associated Sm family protein             |
| TGME49_276900 | -3.75 | 5.41 | 4.82E-05 | 0.000310935 | hypothetical protein                              |
| TGME49_286800 | -8.52 | 5.19 | 4.83E-05 | 0.00031096  | hypothetical protein                              |
| TGME49_274130 | -8.48 | 5.27 | 4.87E-05 | 0.000313035 | TBC domain-containing protein                     |
| TGME49_206695 | 1.84  | 5.29 | 4.88E-05 | 0.000313552 | hypothetical protein                              |
| TGME49_227350 | -3.09 | 5.75 | 4.94E-05 | 0.000316756 | hypothetical protein                              |
| TGME49_209270 | -8.57 | 5.06 | 4.98E-05 | 0.000319508 | hypothetical protein                              |
| TGME49_221710 | -2.60 | 5.92 | 5.01E-05 | 0.000321026 | TBC domain-containing protein                     |
| TGME49_202750 | -8.48 | 5.03 | 5.04E-05 | 0.000322949 | 3' exoribonuclease family, domain 1 domain-conta  |
| TGME49_320440 | -2.35 | 6.19 | 5.07E-05 | 0.000324308 | hypothetical protein                              |
| TGME49_262550 | -8.48 | 4.87 | 5.08E-05 | 0.000324455 | hypothetical protein                              |
| TGME49_268960 | -2.98 | 6.09 | 5.10E-05 | 0.000325133 | 5'-AMP-activated protein kinase subunit beta-1 fa |
| TGME49_218358 | -8.52 | 4.99 | 5.10E-05 | 0.000325133 | zinc knuckle domain-containing protein            |
| TGME49_262650 | -3.77 | 5.56 | 5.11E-05 | 0.000325832 | WD domain, G-beta repeat-containing protein       |
| TGME49_202010 | -2.51 | 6.47 | 5.12E-05 | 0.000326292 | hypothetical protein                              |
| TGME49_319308 | -2.63 | 6.63 | 5.13E-05 | 0.000326522 | hypothetical protein                              |

|               |       |      |          |             |                                                    |
|---------------|-------|------|----------|-------------|----------------------------------------------------|
| TGME49_273920 | -2.61 | 6.00 | 5.15E-05 | 0.00032768  | aldose reductase, putative                         |
| TGME49_249740 | 1.50  | 6.54 | 5.21E-05 | 0.00033084  | translation machinery associated tma7 protein      |
| TGME49_309130 | -8.48 | 5.04 | 5.21E-05 | 0.000330892 | hypothetical protein                               |
| TGME49_297900 | 1.40  | 7.58 | 5.23E-05 | 0.000331261 | hypothetical protein                               |
| TGME49_312960 | 1.26  | 6.29 | 5.23E-05 | 0.000331261 | hypothetical protein                               |
| TGME49_278240 | -8.75 | 4.82 | 5.30E-05 | 0.000335237 | Zn-finger in Ran binding protein and others domain |
| TGME49_295060 | -8.49 | 4.82 | 5.32E-05 | 0.000336309 | exonuclease                                        |
| TGME49_248870 | 1.36  | 6.40 | 5.33E-05 | 0.000336464 | SNARE associated Golgi protein                     |
| TGME49_266390 | -8.48 | 4.86 | 5.36E-05 | 0.000338104 | DNA mismatch repair protein, C-terminal domain-    |
| TGME49_248140 | 3.21  | 5.08 | 5.38E-05 | 0.000339395 | hypothetical protein                               |
| TGME49_270230 | -8.48 | 5.30 | 5.47E-05 | 0.000344822 | hypothetical protein                               |
| TGME49_248160 | -8.48 | 5.47 | 5.50E-05 | 0.00034589  | hypothetical protein                               |
| TGME49_219660 | 3.07  | 5.14 | 5.54E-05 | 0.000348307 | hypothetical protein                               |
| TGME49_279540 | -8.54 | 4.99 | 5.61E-05 | 0.00035209  | hypothetical protein                               |
| TGME49_221280 | -1.56 | 6.77 | 5.70E-05 | 0.000357319 | hypothetical protein                               |
| TGME49_318260 | -3.69 | 5.56 | 5.71E-05 | 0.00035808  | transcription initiation factor TFIID subunit TAF5 |
| TGME49_247700 | 1.31  | 8.30 | 5.82E-05 | 0.00036455  | AP2 domain transcription factor AP2XII-4           |
| TGME49_253410 | 2.32  | 6.01 | 5.86E-05 | 0.000366857 | hypothetical protein                               |
| TGME49_250680 | -2.58 | 5.77 | 5.89E-05 | 0.00036808  | TBC domain-containing kinase (incomplete catalyt   |
| TGME49_254390 | 1.06  | 7.35 | 5.94E-05 | 0.000370653 | CRAL/TRIO domain-containing protein                |
| TGME49_220175 | 2.95  | 4.77 | 6.09E-05 | 0.000378775 | hypothetical protein                               |
| TGME49_227910 | -1.23 | 7.80 | 6.11E-05 | 0.000379848 | hypothetical protein                               |
| TGME49_203760 | 1.36  | 6.32 | 6.18E-05 | 0.000383467 | hypothetical protein                               |
| TGME49_297245 | -1.46 | 7.00 | 6.26E-05 | 0.000387577 | transporter, major facilitator family protein      |
| TGME49_271625 | -8.49 | 4.93 | 6.28E-05 | 0.000388329 | serine--tRNA ligase                                |
| TGME49_205300 | 1.32  | 6.67 | 6.31E-05 | 0.000390271 | hypothetical protein                               |
| TGME49_226030 | -1.07 | 8.61 | 6.33E-05 | 0.000391223 | AGC kinase                                         |
| TGME49_309890 | -3.00 | 5.90 | 6.34E-05 | 0.000391465 | hypothetical protein                               |
| TGME49_260510 | -2.95 | 5.73 | 6.37E-05 | 0.000393006 | ubiquitin thioesterase otubain-like family protein |
| TGME49_300285 | -8.57 | 5.23 | 6.38E-05 | 0.000393238 | hypothetical protein                               |
| TGME49_229930 | 1.35  | 6.97 | 6.39E-05 | 0.00039366  | p25-alpha family protein                           |
| TGME49_248990 | 1.18  | 8.43 | 6.43E-05 | 0.000395267 | hypothetical protein                               |
| TGME49_209240 | 1.56  | 5.74 | 6.46E-05 | 0.00039696  | RNA methyltransferase                              |
| TGME49_289890 | -3.06 | 5.61 | 6.51E-05 | 0.000399319 | hypothetical protein                               |
| TGME49_235478 | -3.79 | 5.93 | 6.54E-05 | 0.000400825 | pantothenate kinase                                |
| TGME49_277840 | 1.13  | 7.24 | 6.57E-05 | 0.000402074 | Ras family protein                                 |
| TGME49_270940 | -8.50 | 4.93 | 6.59E-05 | 0.00040332  | hypothetical protein                               |
| TGME49_224580 | -1.86 | 6.71 | 6.61E-05 | 0.000403557 | RNA recognition motif-containing protein           |
| TGME49_242118 | -8.44 | 5.88 | 6.61E-05 | 0.000403557 | myosin-light-chain kinase                          |
| TGME49_253510 | 2.42  | 6.34 | 6.64E-05 | 0.000405041 | transporter/permease protein                       |
| TGME49_220450 | -8.43 | 4.82 | 6.75E-05 | 0.000410851 | ribonuclease HI protein                            |
| TGME49_262030 | -8.43 | 4.93 | 6.76E-05 | 0.000411377 | ALG6, ALG8 glycosyltransferase family protein      |
| TGME49_208500 | -2.35 | 6.45 | 6.79E-05 | 0.000412097 | protein phosphatase 2C domain-containing protei    |
| TGME49_243530 | -8.44 | 4.75 | 6.79E-05 | 0.000412097 | pentatricopeptide repeat domain-containing prote   |
| TGME49_316300 | -8.44 | 5.17 | 6.79E-05 | 0.000412097 | ATP-dependent DNA helicase, RecQ family protein    |
| TGME49_227310 | -3.69 | 5.53 | 6.85E-05 | 0.000414737 | hypothetical protein                               |
| TGME49_230590 | -8.44 | 5.22 | 6.85E-05 | 0.000414737 | chitobiosyldiphosphodolichol beta-mannosyltrans    |
| TGME49_309580 | -2.95 | 5.70 | 6.87E-05 | 0.000415668 | transporter, major facilitator family protein      |
| TGME49_213420 | -8.43 | 4.75 | 6.95E-05 | 0.00042012  | RAP domain-containing protein                      |
| TGME49_270720 | -8.55 | 5.34 | 6.97E-05 | 0.000420827 | hypothetical protein                               |
| TGME49_264870 | 1.73  | 7.51 | 6.97E-05 | 0.000420863 | Sodium:neurotransmitter symporter family protei    |
| TGME49_268210 | -8.89 | 5.75 | 6.99E-05 | 0.000421609 | AGC kinase                                         |
| TGME49_202180 | -1.70 | 6.37 | 7.04E-05 | 0.000423957 | hypothetical protein                               |
| TGME49_318525 | -1.80 | 6.78 | 7.09E-05 | 0.000426681 | hypothetical protein                               |



|               |       |       |             |             |                                                        |
|---------------|-------|-------|-------------|-------------|--------------------------------------------------------|
| TGME49_260160 | 3.22  | 4.70  | 7.11E-05    | 0.000427524 | hypothetical protein                                   |
| TGME49_233220 | 1.38  | 7.46  | 7.11E-05    | 0.00042759  | hypothetical protein                                   |
| TGME49_285490 | -8.43 | 5.57  | 7.19E-05    | 0.000431905 | helix-hairpin-helix motif domain-containing protei     |
| TGME49_268590 | 1.07  | 7.11  | 7.27E-05    | 0.000435831 | rhomboid protease ROM4                                 |
| TGME49_259210 | -8.43 | 5.17  | 7.27E-05    | 0.000435831 | jmjC domain-containing protein C2orf60                 |
| TGME49_215210 | 2.40  | 6.31  | 7.29E-05    | 0.000436607 | hypothetical protein                                   |
| TGME49_234670 | 1.96  | 5.29  | 7.32E-05    | 0.00043773  | actin-like family protein                              |
| TGME49_263000 | 1.16  | 7.22  | 7.34E-05    | 0.000438624 | Beige/BEACH domain-containing protein                  |
| TGME49_229780 | -3.65 | 5.86  | 7.39E-05    | 0.000441005 | GHMP kinase, N-terminal domain-containing prot         |
| TGME49_316250 | 1.68  | 8.50  | 7.41E-05    | 0.000441917 | hypothetical protein                                   |
| TGME49_261510 | 3.43  | 5.09  | 7.43E-05    | 0.000442624 | hypothetical protein                                   |
| TGME49_289180 | -8.44 | 5.18  | 7.65E-05    | 0.000454693 | thioredoxin family redox-active protein, putative      |
| TGME49_213240 | -8.45 | 5.32  | 7.65E-05    | 0.000454693 | hypothetical protein                                   |
| TGME49_278470 | -3.77 | 5.56  | 7.68E-05    | 0.000456049 | hypothetical protein                                   |
| TGME49_254910 | -2.58 | 6.12  | 7.71E-05    | 0.000457372 | hypothetical protein                                   |
| TGME49_309250 | -1.73 | 6.68  | 7.92E-05    | 0.000469158 | hypothetical protein                                   |
| TGME49_278920 | -2.97 | 5.87  | 8.00E-05    | 0.00047305  | hypothetical protein                                   |
| TGME49_224660 | 1.13  | 6.78  | 8.02E-05    | 0.000473976 | transcription factor s-ii (tfiis), central domain-cont |
| TGME49_254090 | -1.68 | 6.52  | 8.03E-05    | 0.000474166 | hypothetical protein                                   |
| TGME49_285650 | -1.50 | 6.83  | 8.07E-05    | 0.000476358 | hypothetical protein                                   |
| TGME49_285840 | 1.67  | 6.34  | 8.17E-05    | 0.00048191  | RAP domain-containing protein                          |
| TGME49_206480 | 1.17  | 7.77  | 8.26E-05    | 0.000486414 | hypothetical protein                                   |
| TGME49_232020 | -1.94 | 6.60  | 8.28E-05    | 0.000487694 | hypothetical protein                                   |
| TGME49_271870 | -8.39 | 5.32  | 8.35E-05    | 0.000491295 | zinc carboxypeptidase superfamily protein              |
| TGME49_317705 | -2.02 | 6.25  | 8.45E-05    | 0.000496497 | enoyl-CoA hydratase/isomerase family protein           |
| TGME49_271350 | -8.39 | 5.41  | 8.62E-05    | 0.000506431 | bifunctional protein FolC subfamily protein            |
| TGME49_204050 | 1.54  | 10.48 | 8.65E-05    | 0.00050764  | subtilisin SUB1                                        |
| TGME49_231600 | -2.33 | 6.14  | 8.66E-05    | 0.000507988 | HEAT repeat-containing protein                         |
| TGME49_203450 | -2.15 | 6.40  | 8.75E-05    | 0.000511962 | DUF3228 domain-containing protein                      |
| TGME49_272680 | -8.39 | 5.08  | 8.86E-05    | 0.000517399 | hypothetical protein                                   |
| TGME49_224150 | -8.39 | 4.83  | 8.87E-05    | 0.000517579 | hypothetical protein                                   |
| TGME49_223510 | -8.39 | 5.27  | 8.92E-05    | 0.000520224 | hypothetical protein                                   |
| TGME49_311110 | -3.62 | 5.89  | 9.07E-05    | 0.00052844  | Ubiquitin-fold modifier 1 precursor family protein     |
| TGME49_226970 | 1.16  | 10.38 | 9.24E-05    | 0.000537274 | ribosomal protein RPS11                                |
| TGME49_264660 | -1.28 | 9.56  | 9.26E-05    | 0.000538039 | SAG-related sequence SRS44                             |
| TGME49_263330 | -8.48 | 4.96  | 9.28E-05    | 0.000538575 | Adaptin ear-binding coat-associated protein 2 (NE      |
| TGME49_254290 | 1.41  | 6.05  | 9.30E-05    | 0.000539215 | hypothetical protein                                   |
| TGME49_267560 | 2.04  | 5.89  | 9.49E-05    | 0.000548852 | folate-binding protein YgfZ protein                    |
| TGME49_228320 | -8.39 | 4.69  | 9.49E-05    | 0.000548852 | hypothetical protein                                   |
| TGME49_246060 | -8.46 | 5.11  | 9.49E-05    | 0.000548852 | DNA-dependent RNA polymerase                           |
| TGME49_284010 | -3.62 | 5.48  | 9.53E-05    | 0.000550411 | 5'-3' exonuclease, N-terminal resolvase family dor     |
| TGME49_270750 | -2.18 | 6.29  | 9.71E-05    | 0.000559844 | hypothetical protein                                   |
| TGME49_283850 | -1.69 | 8.26  | 9.81E-05    | 0.000564943 | peptidyl-prolyl cis-trans isomerase                    |
| TGME49_209460 | -8.39 | 4.82  | 9.86E-05    | 0.000567484 | hypothetical protein                                   |
| TGME49_240960 | 2.32  | 7.06  | 9.90E-05    | 0.000568497 | AIG2 family protein                                    |
| TGME49_234520 | -2.31 | 5.92  | 9.91E-05    | 0.000568497 | U2 snRNP auxilliary factor, large subunit, splicing f  |
| TGME49_216850 | -8.38 | 4.72  | 9.91E-05    | 0.000568497 | hypothetical protein                                   |
| TGME49_261000 | -1.53 | 7.03  | 0.00010027  | 0.000574724 | MutS domain V domain-containing protein                |
| TGME49_284170 | -8.39 | 4.98  | 0.000100406 | 0.000575057 | DHHC zinc finger domain-containing protein             |
| TGME49_293840 | 1.34  | 6.85  | 0.000101199 | 0.000578306 | hypothetical protein                                   |
| TGME49_221370 | -3.61 | 5.30  | 0.000101207 | 0.000578306 | hypothetical protein                                   |
| TGME49_228340 | -8.39 | 5.00  | 0.000101063 | 0.000578306 | hypothetical protein                                   |
| TGME49_275670 | -1.17 | 8.05  | 0.000101348 | 0.000578661 | alveolin domain containing intermediate filament       |
| TGME49_318480 | -2.29 | 6.16  | 0.000101773 | 0.00058064  | SWI2/SNF2-containing protein RAD5                      |

|               |       |      |             |             |                                                     |
|---------------|-------|------|-------------|-------------|-----------------------------------------------------|
| TGME49_246030 | -8.38 | 5.02 | 0.000102365 | 0.000583566 | mediator complex subunit MED17                      |
| TGME49_268870 | -1.28 | 7.46 | 0.000103269 | 0.000588265 | tetratricopeptide repeat-containing protein         |
| TGME49_281990 | 1.60  | 5.47 | 0.000103385 | 0.000588326 | Nicotinamidase                                      |
| TGME49_264880 | -2.29 | 6.07 | 0.000103439 | 0.000588326 | NEDD8-activating enzyme E1 catalytic subunit        |
| TGME49_288800 | 3.01  | 6.83 | 0.000104709 | 0.0005946   | endonuclease/exonuclease/phosphatase family p       |
| TGME49_246190 | -2.53 | 6.02 | 0.000104783 | 0.0005946   | hypothetical protein                                |
| TGME49_312500 | -1.52 | 7.05 | 0.000105089 | 0.000595878 | hypothetical protein                                |
| TGME49_208340 | -1.20 | 7.28 | 0.000105784 | 0.000599363 | hypothetical protein                                |
| TGME49_262950 | 1.01  | 7.72 | 0.000105983 | 0.000600027 | hypothetical protein                                |
| TGME49_220870 | 1.62  | 5.64 | 0.000106121 | 0.000600349 | hypothetical protein                                |
| TGME49_221610 | -2.13 | 6.25 | 0.000106373 | 0.000601316 | ubiquitin carboxyl-terminal hydrolase               |
| TGME49_211600 | -2.28 | 6.15 | 0.000108381 | 0.000612201 | hypothetical protein                                |
| TGME49_268720 | -2.91 | 5.82 | 0.000110293 | 0.000622046 | Hrf1 family protein                                 |
| TGME49_312190 | -1.68 | 6.85 | 0.000110587 | 0.00062323  | hypothetical protein                                |
| TGME49_300270 | 1.12  | 7.18 | 0.000111175 | 0.000629309 | hypothetical protein                                |
| TGME49_248740 | 1.35  | 8.77 | 0.000112872 | 0.000634659 | hypothetical protein                                |
| TGME49_275990 | 1.20  | 6.58 | 0.000113295 | 0.000636551 | hypothetical protein                                |
| TGME49_217050 | 1.16  | 7.26 | 0.000113549 | 0.000637498 | ADA2-A transcriptional co-activator SAGA compon     |
| TGME49_221690 | -3.61 | 5.62 | 0.000113739 | 0.000638079 | hypothetical protein                                |
| TGME49_224950 | -1.17 | 7.33 | 0.000114213 | 0.000640249 | calcium-dependent protein kinase CDPK5              |
| TGME49_321590 | -1.34 | 7.17 | 0.000115294 | 0.000645334 | hypothetical protein                                |
| TGME49_316230 | -2.26 | 6.16 | 0.000115997 | 0.000648773 | SAC1 phosphoinositide phosphatase, putative         |
| TGME49_248640 | -1.33 | 7.36 | 0.000116543 | 0.000651088 | regulator of chromosome condensation (RCC1) re      |
| TGME49_243290 | -2.10 | 6.21 | 0.000116586 | 0.000651088 | hypothetical protein                                |
| TGME49_225470 | 1.25  | 6.28 | 0.000116941 | 0.000652578 | peptide methionine sulfoxide reductase              |
| TGME49_275980 | -3.58 | 5.59 | 0.000117486 | 0.000655124 | coenzyme q (ubiquinone) biosynthesis protein cod    |
| TGME49_286140 | -2.10 | 5.93 | 0.00011759  | 0.000655206 | hypothetical protein                                |
| TGME49_294390 | -8.33 | 5.02 | 0.000117733 | 0.000655511 | myosin light chain MLC4, putative                   |
| TGME49_237480 | -3.58 | 5.71 | 0.000118364 | 0.000658148 | BRCA1 C Terminus (BRCT) domain-containing prot      |
| TGME49_310520 | -3.61 | 5.14 | 0.000118506 | 0.000658328 | 3'5'-cyclic nucleotide phosphodiesterase domain-c   |
| TGME49_244670 | -1.56 | 6.91 | 0.000119222 | 0.000660816 | hypothetical protein                                |
| TGME49_233860 | -8.40 | 4.93 | 0.000119143 | 0.000660816 | DALR anticodon binding domain-containing protei     |
| TGME49_307020 | -1.89 | 6.25 | 0.000119891 | 0.000663526 | hypothetical protein                                |
| TGME49_239620 | -3.58 | 5.74 | 0.000120509 | 0.000666448 | 5'-nucleotidase, C-terminal domain-containing pro   |
| TGME49_310360 | -1.39 | 7.41 | 0.000120662 | 0.000666799 | hypothetical protein                                |
| TGME49_278960 | -1.75 | 6.55 | 0.000121697 | 0.000672012 | hypothetical protein                                |
| TGME49_312340 | -8.33 | 5.02 | 0.000121787 | 0.000672012 | hypothetical protein                                |
| TGME49_209960 | -1.70 | 6.95 | 0.000123358 | 0.000680168 | glycosyltransferase                                 |
| TGME49_310380 | -8.34 | 5.10 | 0.000123768 | 0.000681924 | brix domain containing protein                      |
| TGME49_318590 | -8.37 | 4.79 | 0.000125169 | 0.000689127 | MRP family domain-containing protein                |
| TGME49_201120 | -1.68 | 6.58 | 0.000125797 | 0.00069207  | ELMO/CED-12 family protein                          |
| TGME49_203840 | 1.45  | 5.77 | 0.000125931 | 0.000692295 | DEAD/DEAH box helicase domain-containing prote      |
| TGME49_264960 | -8.34 | 5.17 | 0.000127115 | 0.000698284 | hypothetical protein                                |
| TGME49_218820 | -1.40 | 8.78 | 0.00012754  | 0.000700094 | alba 2                                              |
| TGME49_239080 | -8.34 | 4.71 | 0.000130261 | 0.000712918 | carrier superfamily protein                         |
| TGME49_239710 | -8.33 | 5.20 | 0.000130738 | 0.000715    | phosphomannomutase                                  |
| TGME49_244110 | -1.27 | 8.05 | 0.000131107 | 0.000716485 | nucleosome assembly protein (nap) protein           |
| TGME49_258680 | -2.07 | 6.21 | 0.000132451 | 0.000723296 | TATA-box binding protein TBP2                       |
| TGME49_227390 | -2.88 | 5.44 | 0.000134374 | 0.000732717 | hypothetical protein                                |
| TGME49_240660 | -8.35 | 4.90 | 0.000135116 | 0.000736215 | hypothetical protein                                |
| TGME49_290340 | -2.30 | 6.17 | 0.000135936 | 0.000740139 | HEAT repeat-containing protein                      |
| TGME49_259830 | 1.56  | 6.46 | 0.000136716 | 0.000743292 | diacylglycerol kinase catalytic domain-containing p |
| TGME49_261600 | 1.04  | 7.25 | 0.00013694  | 0.000743963 | creatinase domain-containing protein                |
| TGME49_306330 | -1.93 | 6.75 | 0.000139289 | 0.000755617 | phospholipase                                       |

|               |       |       |             |             |                                                   |
|---------------|-------|-------|-------------|-------------|---------------------------------------------------|
| TGME49_224900 | -1.16 | 7.72  | 0.000140568 | 0.000761992 | adenylate kinase, putative                        |
| TGME49_246530 | -3.69 | 5.27  | 0.000141163 | 0.00076466  | phospholipase D active site domain-containing pro |
| TGME49_230010 | -1.93 | 6.26  | 0.000141695 | 0.000766979 | hypothetical protein                              |
| TGME49_203970 | -2.86 | 5.54  | 0.000141975 | 0.00076764  | dolichyl-diphosphooligosaccharide--protein glycos |
| TGME49_283810 | -3.59 | 5.42  | 0.000142025 | 0.00076764  | hypothetical protein                              |
| TGME49_297890 | 1.20  | 6.67  | 0.000144451 | 0.000779614 | hypothetical protein                              |
| TGME49_300260 | -1.04 | 8.27  | 0.000144948 | 0.000781727 | threonyl-tRNA synthetase family protein           |
| TGME49_255940 | 1.68  | 5.25  | 0.000147011 | 0.000792274 | hypothetical protein                              |
| TGME49_294720 | -2.56 | 5.83  | 0.000148705 | 0.00080082  | hypothetical protein                              |
| TGME49_260650 | -3.58 | 5.40  | 0.000150313 | 0.000808302 | glycosyltransferase, group 2 family protein       |
| TGME49_257290 | -8.36 | 5.89  | 0.000150497 | 0.000808595 | RNA 2'-phosphotransferase, Tpt1/KptA family pro   |
| TGME49_316570 | 1.04  | 7.16  | 0.000151569 | 0.000813281 | hypothetical protein                              |
| TGME49_238170 | 1.36  | 6.42  | 0.000152903 | 0.00081925  | hypothetical protein                              |
| TGME49_224235 | -8.28 | 5.14  | 0.00015421  | 0.000825654 | translation initiation factor IF-3 protein        |
| TGME49_224230 | 2.04  | 5.03  | 0.000156979 | 0.000839872 | AP2 domain transcription factor AP2X-3            |
| TGME49_242260 | 1.48  | 7.17  | 0.000157792 | 0.000842339 | hypothetical protein                              |
| TGME49_299050 | 1.17  | 10.43 | 0.000157613 | 0.000842339 | ribosomal protein RPL17                           |
| TGME49_315500 | -1.60 | 6.66  | 0.000157896 | 0.000842339 | hypothetical protein                              |
| TGME49_206390 | -8.28 | 4.99  | 0.000157715 | 0.000842339 | hypothetical protein                              |
| TGME49_248880 | -1.20 | 7.90  | 0.000158406 | 0.000844105 | GTPase RAB7                                       |
| TGME49_261710 | -1.64 | 6.65  | 0.000158455 | 0.000844105 | ankyrin repeat-containing protein                 |
| TGME49_294430 | -3.54 | 5.21  | 0.000160072 | 0.000852106 | hypothetical protein                              |
| TGME49_252070 | 1.65  | 5.12  | 0.00016075  | 0.0008551   | KRUF family protein                               |
| TGME49_230500 | -3.54 | 5.36  | 0.000160992 | 0.000855771 | hypothetical protein                              |
| TGME49_293330 | -8.28 | 5.03  | 0.000161712 | 0.000858573 | hypothetical protein                              |
| TGME49_217350 | -8.29 | 5.39  | 0.000162054 | 0.00085956  | methyltransferase MTA70, putative                 |
| TGME49_216500 | -3.54 | 5.77  | 0.000162523 | 0.000861432 | tRNA synthetase, putative                         |
| TGME49_212725 | -2.49 | 5.73  | 0.000163716 | 0.000866509 | hypothetical protein                              |
| TGME49_238000 | -3.58 | 5.17  | 0.000164669 | 0.000870932 | peptidyl-prolyl isomerase                         |
| TGME49_236800 | -8.29 | 5.06  | 0.000164972 | 0.000871908 | hypothetical protein                              |
| TGME49_215550 | -2.55 | 5.78  | 0.000165366 | 0.000873367 | hypothetical protein                              |
| TGME49_294050 | 1.60  | 7.02  | 0.000165739 | 0.000874715 | hypothetical protein                              |
| TGME49_258180 | -8.34 | 4.82  | 0.000165943 | 0.000875165 | hypothetical protein                              |
| TGME49_246160 | 2.25  | 4.93  | 0.000166186 | 0.000875824 | hypothetical protein                              |
| TGME49_288260 | -1.61 | 6.74  | 0.000166641 | 0.000877594 | hypothetical protein                              |
| TGME49_254380 | -8.29 | 5.12  | 0.000168407 | 0.000886265 | ribosomal protein L11, putative                   |
| TGME49_221950 | -1.47 | 6.81  | 0.000169746 | 0.000892675 | spliceosome-associated protein, putative          |
| TGME49_257370 | 2.21  | 5.96  | 0.00017024  | 0.000894636 | hypothetical protein                              |
| TGME49_205160 | 1.94  | 5.28  | 0.000170978 | 0.000897878 | hypothetical protein                              |
| TGME49_307980 | 2.27  | 5.22  | 0.000171369 | 0.000899294 | GTP-binding protein lepA, putative                |
| TGME49_216870 | -2.22 | 5.83  | 0.00017196  | 0.000901753 | DNA excision repair helicase                      |
| TGME49_235140 | 1.74  | 7.26  | 0.000172893 | 0.000906003 | hypothetical protein                              |
| TGME49_216930 | -1.60 | 6.83  | 0.000173184 | 0.000906883 | cholinephosphate cytidyltransferase               |
| TGME49_313385 | 1.96  | 5.03  | 0.000174126 | 0.000909972 | hypothetical protein                              |
| TGME49_264650 | -8.32 | 4.90  | 0.000175397 | 0.000915236 | phosphoacetylglucosamine mutase                   |
| TGME49_232780 | -2.50 | 6.30  | 0.000175714 | 0.000916241 | hypothetical protein                              |
| TGME49_297150 | -1.30 | 7.18  | 0.000176262 | 0.000918449 | MORN repeat-containing protein                    |
| TGME49_306030 | -1.53 | 7.04  | 0.000178266 | 0.000926753 | glutathione s-transferase, n-terminal domain cont |
| TGME49_216920 | -2.52 | 5.62  | 0.000178203 | 0.000926753 | mediator complex subunit MED8                     |
| TGME49_313418 | -8.32 | 5.19  | 0.000178357 | 0.000926753 | hypothetical protein                              |
| TGME49_226330 | -8.28 | 4.87  | 0.00017944  | 0.00093173  | hypothetical protein                              |
| TGME49_233890 | -2.25 | 6.03  | 0.00017967  | 0.000932266 | hypothetical protein                              |
| TGME49_312905 | 1.94  | 7.21  | 0.000180105 | 0.000933341 | hypothetical protein                              |
| TGME49_294380 | -2.83 | 5.40  | 0.000180129 | 0.000933341 | PP-loop domain-containing protein                 |

|               |       |      |             |             |                                                   |
|---------------|-------|------|-------------|-------------|---------------------------------------------------|
| TGME49_273030 | -2.83 | 5.76 | 0.00018094  | 0.00093623  | phosphoglycerate mutase family protein            |
| TGME49_311090 | -1.28 | 7.32 | 0.00018231  | 0.000942656 | ubiquitin carboxyl-terminal hydrolase             |
| TGME49_285980 | 1.02  | 8.53 | 0.000185571 | 0.00095818  | glucosephosphate-mutase GPM1                      |
| TGME49_271110 | -3.54 | 5.21 | 0.000186922 | 0.000964481 | hypothetical protein                              |
| TGME49_309800 | -1.53 | 6.85 | 0.000190219 | 0.000980124 | RNA recognition motif-containing protein          |
| TGME49_264720 | -3.51 | 5.63 | 0.000193637 | 0.000995656 | hypothetical protein                              |
| TGME49_312430 | 1.36  | 6.02 | 0.000194116 | 0.000996737 | hypothetical protein                              |
| TGME49_277070 | 1.47  | 5.84 | 0.000194575 | 0.000998398 | SWI2/SNF2-containing protein                      |
| TGME49_271860 | -8.31 | 4.88 | 0.000194995 | 0.000999857 | tRNA (Uracil-5-)-methyltransferase                |
| TGME49_226740 | 1.27  | 7.97 | 0.000195664 | 0.001002593 | zinc finger, C3HC4 type (RING finger) domain-cont |
| TGME49_281570 | -3.51 | 5.67 | 0.000197541 | 0.00101151  | hypothetical protein                              |
| TGME49_203180 | -3.51 | 5.86 | 0.000198349 | 0.001014944 | leucine rich repeat-containing protein            |
| TGME49_306410 | -3.51 | 5.79 | 0.000198997 | 0.001017553 | hypothetical protein                              |
| TGME49_221580 | -1.28 | 7.41 | 0.00019962  | 0.001020035 | ribosomal RNA large subunit methyltransferase J p |
| TGME49_294740 | -1.91 | 6.49 | 0.000200004 | 0.001021292 | hypothetical protein                              |
| TGME49_257340 | -8.23 | 5.20 | 0.000200215 | 0.001021663 | Ras family protein                                |
| TGME49_305850 | -1.04 | 7.71 | 0.000200638 | 0.001023113 | RNA recognition motif-containing protein          |
| TGME49_211090 | -1.51 | 6.64 | 0.000201073 | 0.001023923 | aminotransferase, class V superfamily protein     |
| TGME49_266100 | 1.08  | 6.94 | 0.000202356 | 0.001029744 | rhopty kinase family protein ROP41                |
| TGME49_306560 | -2.91 | 5.99 | 0.000202761 | 0.001030161 | hypothetical protein                              |
| TGME49_217750 | -3.51 | 5.56 | 0.000202708 | 0.001030161 | hypothetical protein                              |
| TGME49_301130 | -8.23 | 5.01 | 0.000202856 | 0.001030161 | hypothetical protein                              |
| TGME49_226560 | -3.51 | 5.49 | 0.000203341 | 0.001031565 | zinc finger (CCCH type) motif-containing protein  |
| TGME49_306210 | -8.34 | 5.06 | 0.000203411 | 0.001031565 | RNA polymerase II accessory factor CDC73          |
| TGME49_202630 | -1.21 | 7.37 | 0.00020417  | 0.001034706 | ATP-dependent metalloproteinase HflB subfamily p  |
| TGME49_289190 | -8.23 | 4.82 | 0.000205057 | 0.001038489 | tetratricopeptide repeat-containing protein       |
| TGME49_313140 | 1.42  | 8.23 | 0.000205206 | 0.00103853  | isocitrate dehydrogenase                          |
| TGME49_213115 | -8.23 | 4.95 | 0.000206075 | 0.001042218 | hypothetical protein                              |
| TGME49_282140 | 1.28  | 6.45 | 0.000206701 | 0.001044084 | cwf21 protein                                     |
| TGME49_264040 | -1.11 | 7.86 | 0.000209065 | 0.001053015 | hypothetical protein                              |
| TGME49_208780 | -2.45 | 6.22 | 0.000209372 | 0.001053845 | ubiquitin-conjugating enzyme subfamily protein    |
| TGME49_272670 | -8.23 | 4.99 | 0.000210683 | 0.00105972  | peptidase family M3 protein                       |
| TGME49_238180 | -1.10 | 7.48 | 0.00021103  | 0.001060024 | 26s proteasome regulatory complex subunit, puta   |
| TGME49_233490 | -8.29 | 5.10 | 0.000213832 | 0.001073369 | hypothetical protein                              |
| TGME49_233790 | -8.22 | 5.24 | 0.000214028 | 0.001073625 | serine/threonine protein kinase AktR, putative    |
| TGME49_293280 | 1.31  | 5.89 | 0.00021457  | 0.001075615 | cyclin protein                                    |
| TGME49_286230 | 1.29  | 6.35 | 0.00021533  | 0.001078691 | hypothetical protein                              |
| TGME49_310320 | -3.51 | 5.64 | 0.000215528 | 0.001078951 | calreticulin family protein                       |
| TGME49_252870 | 1.95  | 4.88 | 0.000215908 | 0.001080126 | hypothetical protein                              |
| TGME49_237290 | -1.40 | 7.15 | 0.000217042 | 0.00108433  | hypothetical protein                              |
| TGME49_268620 | -8.23 | 4.67 | 0.000217371 | 0.001085239 | blood stage antigen 41-3 precursor, putative      |
| TGME49_221640 | 2.25  | 6.98 | 0.000218155 | 0.001088417 | hypothetical protein                              |
| TGME49_213880 | 2.50  | 4.99 | 0.000218743 | 0.001089881 | hypothetical protein                              |
| TGME49_309160 | -2.03 | 6.33 | 0.000219447 | 0.001092656 | IgA-specific metalloendopeptidase                 |
| TGME49_260450 | -8.23 | 5.10 | 0.000220112 | 0.001095226 | DEAD/DEAH box helicase domain-containing prote    |
| TGME49_248850 | -8.24 | 5.24 | 0.000220826 | 0.00109804  | methionine aminopeptidase                         |
| TGME49_254800 | 1.72  | 5.35 | 0.000221776 | 0.001102025 | hypothetical protein                              |
| TGME49_300380 | -2.80 | 5.70 | 0.000221983 | 0.001102313 | endoplasmic reticulum oxidoreductin, putative     |
| TGME49_276170 | 1.39  | 9.19 | 0.000223263 | 0.001107799 | phosphatidylinositol 3- and 4-kinase              |
| TGME49_307040 | -1.48 | 6.89 | 0.000223388 | 0.001107799 | shikimate dehydrogenase substrate binding doma    |
| TGME49_265850 | 1.90  | 6.27 | 0.000227169 | 0.001125798 | hypothetical protein                              |
| TGME49_269290 | -2.43 | 6.26 | 0.00022976  | 0.001137872 | hypothetical protein                              |
| TGME49_318610 | 1.60  | 5.24 | 0.00023033  | 0.001139933 | AP2 domain transcription factor AP2IV-3           |
| TGME49_235460 | 1.27  | 6.18 | 0.000231354 | 0.001144233 | hypothetical protein                              |

|               |       |      |             |             |                                                    |
|---------------|-------|------|-------------|-------------|----------------------------------------------------|
| TGME49_311250 | -2.87 | 6.06 | 0.000233011 | 0.001150889 | hypothetical protein                               |
| TGME49_202680 | -1.26 | 8.26 | 0.000240708 | 0.001187324 | peptidase M16, alpha subunit, putative             |
| TGME49_234220 | -1.87 | 6.36 | 0.000241926 | 0.001192533 | hypothetical protein                               |
| TGME49_215920 | 1.79  | 5.98 | 0.000242237 | 0.001193271 | hypothetical protein                               |
| TGME49_244470 | -1.14 | 7.80 | 0.000243628 | 0.001199323 | hypothetical protein                               |
| TGME49_244660 | -3.51 | 5.30 | 0.000244869 | 0.001204634 | hypothetical protein                               |
| TGME49_252320 | -8.22 | 5.00 | 0.000246395 | 0.001211332 | Sas10/Utp3/C1D family protein                      |
| TGME49_270060 | -2.22 | 5.79 | 0.000247757 | 0.001217218 | hypothetical protein                               |
| TGME49_262500 | -1.42 | 7.01 | 0.000248574 | 0.001220423 | hypothetical protein                               |
| TGME49_315700 | -2.80 | 5.81 | 0.000249277 | 0.001222249 | hypothetical protein                               |
| TGME49_316540 | -1.15 | 7.70 | 0.000251845 | 0.001234024 | IMC sub-compartment protein ISP3                   |
| TGME49_214870 | 1.67  | 5.32 | 0.00025297  | 0.001238716 | ribosomal protein L9, N-terminal domain-containing |
| TGME49_258030 | -1.82 | 6.12 | 0.000254148 | 0.001243658 | DNA polymerase                                     |
| TGME49_253700 | 1.04  | 8.40 | 0.000258836 | 0.001263254 | transporter, major facilitator family protein      |
| TGME49_251670 | -3.47 | 5.58 | 0.000259152 | 0.001263964 | werner helicase interacting protein 1, putative    |
| TGME49_313860 | 1.80  | 7.16 | 0.00026019  | 0.001268193 | regulator of chromosome condensation (RCC1) re     |
| TGME49_249840 | -8.17 | 5.34 | 0.000260988 | 0.00127124  | dynein heavy chain 2, putative                     |
| TGME49_272320 | 1.53  | 5.67 | 0.000261804 | 0.001274376 | DHHC zinc finger domain-containing protein         |
| TGME49_218270 | -1.01 | 7.57 | 0.000262711 | 0.00127795  | hypothetical protein                               |
| TGME49_263610 | -1.59 | 6.91 | 0.000265056 | 0.00128851  | hypothetical protein                               |
| TGME49_202460 | -1.77 | 6.49 | 0.000265873 | 0.001291631 | diacylglycerol kinase accessory domain (presumed   |
| TGME49_271000 | -2.27 | 5.98 | 0.000267343 | 0.001297923 | hypothetical protein                               |
| TGME49_321300 | -3.47 | 5.37 | 0.000268055 | 0.001299958 | autophagy-related 12 variant 1, putative           |
| TGME49_234950 | 1.64  | 6.24 | 0.000268681 | 0.001300969 | protein kinase (incomplete catalytic triad)        |
| TGME49_220920 | -8.17 | 4.78 | 0.000268652 | 0.001300969 | hypothetical protein                               |
| TGME49_235560 | -8.18 | 5.26 | 0.000269339 | 0.001302482 | hypothetical protein                               |
| TGME49_257595 | -2.88 | 5.61 | 0.000269797 | 0.001303464 | hypothetical protein                               |
| TGME49_305600 | -8.17 | 4.82 | 0.000269895 | 0.001303464 | hypothetical protein                               |
| TGME49_223672 | 1.66  | 5.57 | 0.00027023  | 0.001304231 | 3'(2'),5'-bisphosphate nucleotidase                |
| TGME49_229340 | -8.17 | 4.88 | 0.000270579 | 0.001305065 | hypothetical protein                               |
| TGME49_247380 | -8.17 | 5.36 | 0.000272948 | 0.001315628 | hypothetical protein                               |
| TGME49_239610 | -3.47 | 5.48 | 0.000273559 | 0.001317716 | hypothetical protein                               |
| TGME49_273850 | -2.77 | 5.77 | 0.000274089 | 0.001318614 | hypothetical protein                               |
| TGME49_312380 | -8.17 | 4.96 | 0.000274102 | 0.001318614 | tetratricopeptide repeat-containing protein        |
| TGME49_230710 | -3.53 | 5.18 | 0.00027871  | 0.00133991  | cell division protein CDC48                        |
| TGME49_316360 | -3.53 | 5.40 | 0.000279845 | 0.001344494 | hypothetical protein                               |
| TGME49_229940 | -2.40 | 5.72 | 0.000280603 | 0.001346387 | cyclophilin, putative                              |
| TGME49_242850 | -2.40 | 5.93 | 0.000280864 | 0.001346763 | hypothetical protein                               |
| TGME49_216680 | -2.15 | 7.27 | 0.000283288 | 0.001354872 | ankyrin repeat-containing protein                  |
| TGME49_289000 | -2.77 | 5.79 | 0.000283136 | 0.001354872 | hypothetical protein                               |
| TGME49_228720 | -8.17 | 4.72 | 0.000283009 | 0.001354872 | hypothetical protein                               |
| TGME49_252360 | 1.02  | 9.00 | 0.000284139 | 0.001356029 | rhoGTPase family protein ROP24 (incomplete c       |
| TGME49_312618 | -1.89 | 5.90 | 0.000284264 | 0.001356029 | hypothetical protein                               |
| TGME49_321610 | -8.17 | 4.89 | 0.000284101 | 0.001356029 | hypothetical protein                               |
| TGME49_235750 | -8.17 | 5.02 | 0.000284723 | 0.001357344 | ULK kinase                                         |
| TGME49_216970 | -1.15 | 7.94 | 0.000286589 | 0.001365362 | coronin, putative                                  |
| TGME49_260370 | -1.99 | 6.27 | 0.000287321 | 0.001367967 | AtPH1 family protein                               |
| TGME49_315690 | -3.47 | 5.51 | 0.000288086 | 0.001370724 | DnaJ domain-containing protein                     |
| TGME49_270610 | 1.55  | 5.44 | 0.000291374 | 0.00138353  | hypothetical protein                               |
| TGME49_238110 | -2.21 | 6.29 | 0.000291525 | 0.00138353  | replication factor a protein 3 protein             |
| TGME49_248890 | -2.40 | 6.03 | 0.000293937 | 0.001394078 | actin-like protein ALP3b                           |
| TGME49_235680 | -1.67 | 7.23 | 0.000294212 | 0.001394488 | peptidase M16 inactive domain-containing protein   |
| TGME49_319940 | -8.17 | 4.88 | 0.000295351 | 0.00139899  | hypothetical protein                               |
| TGME49_312310 | -2.81 | 5.42 | 0.000296476 | 0.001403422 | ATPase, AAA family protein                         |

|               |       |      |             |             |                                                   |
|---------------|-------|------|-------------|-------------|---------------------------------------------------|
| TGME49_239630 | -3.49 | 5.29 | 0.000300242 | 0.001420337 | cytidine and deoxycytidylate deaminase zinc-bind  |
| TGME49_272475 | -8.17 | 5.24 | 0.000301262 | 0.001424251 | protein kinase domain-containing protein          |
| TGME49_212090 | 1.11  | 6.61 | 0.000302007 | 0.001425951 | hypothetical protein                              |
| TGME49_275330 | -3.46 | 5.64 | 0.000301969 | 0.001425951 | ribosomal protein RPL29                           |
| TGME49_201230 | -2.76 | 5.61 | 0.000308872 | 0.001456503 | kinesin motor domain-containing protein           |
| TGME49_252220 | -1.36 | 7.73 | 0.000311799 | 0.001469372 | tetratricopeptide repeat domain containing prote  |
| TGME49_207940 | -3.47 | 5.31 | 0.000314362 | 0.001480507 | ribosomal protein S9, putative                    |
| TGME49_318460 | -1.58 | 6.53 | 0.000318007 | 0.001495768 | P-type ATPase of unknown pump specificity (type   |
| TGME49_204270 | -2.21 | 6.05 | 0.000319175 | 0.001500306 | hypothetical protein                              |
| TGME49_263590 | -2.42 | 5.74 | 0.000319465 | 0.001500713 | hypothetical protein                              |
| TGME49_309220 | -1.37 | 7.36 | 0.000321722 | 0.001510356 | GTPase activating protein for Arf protein         |
| TGME49_210360 | 1.75  | 6.68 | 0.000322762 | 0.001514277 | DEAD (Asp-Glu-Ala-Asp) box polypeptide 41 family  |
| TGME49_310350 | -1.78 | 6.39 | 0.000323431 | 0.001516453 | PGAP1 family protein                              |
| TGME49_300990 | 1.85  | 5.28 | 0.000324463 | 0.001520329 | Toxoplasma gondii family C protein                |
| TGME49_263530 | -1.60 | 6.47 | 0.000325395 | 0.00152373  | chaperonin , putative                             |
| TGME49_265400 | -1.62 | 6.69 | 0.000327456 | 0.001532412 | hypothetical protein                              |
| TGME49_213670 | -1.46 | 6.71 | 0.000330405 | 0.001545233 | hypothetical protein                              |
| TGME49_238230 | -2.77 | 5.73 | 0.000331045 | 0.001546283 | Ser/Thr phosphatase family protein                |
| TGME49_267390 | -1.57 | 6.54 | 0.00033138  | 0.001546859 | DNA-directed RNA polymerase I RPAC1               |
| TGME49_300060 | -1.10 | 7.18 | 0.000332331 | 0.00155032  | signal peptidase subunit protein                  |
| TGME49_208590 | -1.53 | 7.00 | 0.000336002 | 0.001566454 | vacuolar ATP synthase subunit 54kD, putative      |
| TGME49_232360 | -1.60 | 6.79 | 0.000336842 | 0.001567408 | exonuclease                                       |
| TGME49_288570 | -2.74 | 5.83 | 0.000336736 | 0.001567408 | hypothetical protein                              |
| TGME49_239130 | 1.45  | 5.73 | 0.000338538 | 0.001574309 | Tyrosine kinase-like (TKL) protein                |
| TGME49_318750 | 1.28  | 5.79 | 0.000339957 | 0.001578919 | deoxyribose-phosphate aldolase                    |
| TGME49_226660 | -1.30 | 7.06 | 0.00033981  | 0.001578919 | hypothetical protein                              |
| TGME49_247330 | -1.75 | 6.92 | 0.000342685 | 0.001589592 | hypothetical protein                              |
| TGME49_269140 | -1.79 | 6.33 | 0.000342489 | 0.001589592 | transport protein particle component, Bet3 domain |
| TGME49_219460 | -2.74 | 5.68 | 0.000350061 | 0.001621774 | hypothetical protein                              |
| TGME49_270160 | -8.11 | 4.78 | 0.000354903 | 0.001642149 | hypothetical protein                              |
| TGME49_311280 | -8.12 | 4.70 | 0.000356701 | 0.001648405 | hypothetical protein                              |
| TGME49_234610 | -1.55 | 6.61 | 0.000360883 | 0.001663623 | WD-40 repeat protein                              |
| TGME49_310810 | -1.83 | 6.36 | 0.000360894 | 0.001663623 | apyrase                                           |
| TGME49_214800 | -8.11 | 4.74 | 0.000369446 | 0.001700926 | hypothetical protein                              |
| TGME49_301180 | 2.01  | 5.49 | 0.000369888 | 0.001701901 | SAG-related sequence SRS19F                       |
| TGME49_234440 | -3.44 | 5.42 | 0.00037356  | 0.001715593 | aminotransferase, putative                        |
| TGME49_240830 | -8.11 | 4.70 | 0.000375009 | 0.001721178 | hydrolase, alpha/beta fold family protein         |
| TGME49_236280 | 2.04  | 4.85 | 0.000376246 | 0.001724463 | hypothetical protein                              |
| TGME49_252510 | 1.49  | 5.83 | 0.000376425 | 0.001724463 | hypothetical protein                              |
| TGME49_297510 | -8.12 | 5.32 | 0.000375998 | 0.001724463 | hypothetical protein                              |
| TGME49_270650 | 1.77  | 5.24 | 0.000381123 | 0.001743825 | deoxyribose-phosphate aldolase                    |
| TGME49_224330 | -1.28 | 6.99 | 0.000386136 | 0.001763492 | proteasome activator pa28 beta subunit protein    |
| TGME49_310560 | -3.42 | 5.55 | 0.000385929 | 0.001763492 | hypothetical protein                              |
| TGME49_297720 | -1.07 | 7.54 | 0.000387048 | 0.001766562 | trehalose-phosphatase                             |
| TGME49_307810 | -1.21 | 7.09 | 0.000388971 | 0.001774247 | hypothetical protein                              |
| TGME49_258920 | -8.13 | 4.81 | 0.000390777 | 0.001781382 | hypothetical protein                              |
| TGME49_205570 | -2.73 | 5.58 | 0.000391146 | 0.001781966 | hypothetical protein                              |
| TGME49_255170 | -3.43 | 5.01 | 0.000391958 | 0.001784271 | hypothetical protein                              |
| TGME49_255690 | -2.74 | 5.59 | 0.000393935 | 0.001791363 | 2-C-methyl-D-erythritol 2,4-cyclodiphosphate synt |
| TGME49_227430 | -1.72 | 6.17 | 0.000394558 | 0.001793093 | transmembrane amino acid transporter protein      |
| TGME49_257150 | -2.73 | 5.49 | 0.000395383 | 0.001795737 | NOT2 / NOT3 / NOT5 family protein                 |
| TGME49_226840 | -2.74 | 5.41 | 0.000395662 | 0.001795904 | hypothetical protein                              |
| TGME49_267120 | -2.74 | 5.47 | 0.000397422 | 0.00180256  | hypothetical protein                              |
| TGME49_248130 | -8.13 | 4.76 | 0.00040149  | 0.001818039 | hypothetical protein                              |

|               |       |      |             |             |                                                      |
|---------------|-------|------|-------------|-------------|------------------------------------------------------|
| TGME49_253300 | 2.29  | 4.94 | 0.000402124 | 0.001818442 | hypothetical protein                                 |
| TGME49_306290 | -1.87 | 6.40 | 0.000402349 | 0.001818442 | DNA-directed RNA polymerase III RPC1                 |
| TGME49_297460 | -8.12 | 5.02 | 0.000402327 | 0.001818442 | hypothetical protein                                 |
| TGME49_204140 | -8.17 | 4.77 | 0.000404667 | 0.001827799 | PHD-finger domain-containing protein                 |
| TGME49_209080 | 1.29  | 6.24 | 0.000405496 | 0.001830427 | transport protein particle (trapp) component, beta   |
| TGME49_273840 | -2.40 | 5.63 | 0.000406807 | 0.001835224 | brix domain-containing protein                       |
| TGME49_209930 | -8.12 | 5.30 | 0.000412854 | 0.001856839 | hypothetical protein                                 |
| TGME49_308580 | -2.37 | 5.95 | 0.000413169 | 0.001857127 | Lon protease family protein                          |
| TGME49_313240 | -2.78 | 5.84 | 0.000413784 | 0.00185876  | ethylene-responsive RNA helicase, putative           |
| TGME49_264440 | -1.83 | 6.16 | 0.000425412 | 0.001906385 | signal recognition particle receptor beta subunit p  |
| TGME49_231890 | -1.86 | 6.02 | 0.000425621 | 0.001906385 | beta-ketoacyl-acyl carrier protein synthase III, put |
| TGME49_215290 | -3.39 | 5.79 | 0.000429861 | 0.001923965 | saccharopine dehydrogenase domain-containing p       |
| TGME49_299110 | -1.95 | 6.49 | 0.000434013 | 0.001941376 | cleft lip and palate transmembrane protein 1 (clpt   |
| TGME49_223060 | -1.76 | 6.32 | 0.000434715 | 0.001943339 | MORN repeat-containing protein                       |
| TGME49_314840 | -1.63 | 6.47 | 0.000435466 | 0.001944345 | ubiquitin carboxyl-terminal hydrolase                |
| TGME49_311510 | -1.44 | 8.65 | 0.000436566 | 0.001948078 | eIF2 kinase IF2K-B                                   |
| TGME49_304760 | 1.05  | 7.95 | 0.000440147 | 0.001962875 | RNA recognition motif-containing protein             |
| TGME49_221490 | -2.70 | 5.40 | 0.000446759 | 0.00199116  | cell cycle regulator protein                         |
| TGME49_297780 | -2.34 | 6.07 | 0.00045559  | 0.002027997 | ATPase/histidine kinase/DNA gyrase B/HSP90 dom       |
| TGME49_257710 | -3.39 | 5.56 | 0.000455847 | 0.002027997 | actin-like protein ALP 5                             |
| TGME49_225680 | -2.70 | 5.66 | 0.000459688 | 0.002043858 | hypothetical protein                                 |
| TGME49_227600 | -1.12 | 9.30 | 0.000460659 | 0.002046775 | ribosomal protein RPL34                              |
| TGME49_224350 | -1.37 | 8.79 | 0.000460898 | 0.002046775 | aminopeptidase N, putative                           |
| TGME49_233820 | -8.05 | 4.93 | 0.000461811 | 0.0020496   | DNA polymerase epsilon subunit B protein             |
| TGME49_255390 | -3.39 | 5.42 | 0.000465031 | 0.002062652 | HEAT repeat-containing protein                       |
| TGME49_217360 | -2.70 | 5.95 | 0.000466158 | 0.002066411 | hypothetical protein                                 |
| TGME49_273350 | 1.51  | 5.36 | 0.000469482 | 0.002079899 | molybdopterin converting factor, subunit 2 protei    |
| TGME49_230430 | -8.05 | 5.34 | 0.000470515 | 0.002083225 | vesicle-associated membrane protein, putative        |
| TGME49_244230 | -8.06 | 5.32 | 0.000471535 | 0.002085244 | hypothetical protein                                 |
| TGME49_242435 | -3.39 | 5.43 | 0.000472142 | 0.002086683 | hypothetical protein                                 |
| TGME49_312280 | -1.39 | 6.89 | 0.000473532 | 0.002091574 | pre-mRNA-splicing factor ATP-dependent RNA hel       |
| TGME49_295450 | -1.22 | 7.30 | 0.000476546 | 0.002102763 | sjoegren syndrome nuclear autoantigen 1 family p     |
| TGME49_212150 | -8.06 | 5.30 | 0.000476634 | 0.002102763 | hypothetical protein                                 |
| TGME49_251890 | -3.39 | 5.68 | 0.000477605 | 0.002104772 | hypothetical protein                                 |
| TGME49_318290 | -8.05 | 5.09 | 0.000477962 | 0.002104857 | hypothetical protein                                 |
| TGME49_233090 | -8.06 | 4.99 | 0.000479082 | 0.002107276 | XPG N-terminal domain-containing protein             |
| TGME49_320015 | -8.05 | 4.68 | 0.000488741 | 0.002148483 | hypothetical protein                                 |
| TGME49_218250 | -2.13 | 6.10 | 0.00048922  | 0.002149311 | TAP42 family protein                                 |
| TGME49_203420 | 1.97  | 5.22 | 0.000490063 | 0.002151739 | 4'-phosphopantetheinyl transferase domain-conta      |
| TGME49_221360 | -2.13 | 5.89 | 0.000490766 | 0.002153547 | hypothetical protein                                 |
| TGME49_219140 | -1.48 | 6.80 | 0.000491443 | 0.002155237 | EF-1 guanine nucleotide exchange domain-contain      |
| TGME49_312840 | -1.82 | 6.43 | 0.000492557 | 0.002158843 | hypothetical protein                                 |
| TGME49_221830 | 1.87  | 5.06 | 0.00049696  | 0.00217556  | subtilisin SUB12                                     |
| TGME49_285470 | 1.99  | 5.36 | 0.000500375 | 0.002187919 | patched family protein                               |
| TGME49_270450 | -8.05 | 4.74 | 0.000505018 | 0.002206175 | MCM2/3/5 family protein                              |
| TGME49_224190 | -1.56 | 6.40 | 0.000507577 | 0.002214175 | cation-transporting atpase family protein            |
| TGME49_223070 | -1.12 | 7.72 | 0.000516222 | 0.002247908 | hypothetical protein                                 |
| TGME49_313150 | 2.10  | 6.73 | 0.000517113 | 0.002250462 | DUF89/Fructose bisphosphatase                        |
| TGME49_226940 | -3.41 | 5.08 | 0.00051879  | 0.002255104 | ubiquitin carboxyl-terminal hydrolase                |
| TGME49_291090 | -8.07 | 5.22 | 0.000519452 | 0.002256658 | SWI2/SNF2-containing protein                         |
| TGME49_297210 | 1.08  | 6.93 | 0.000521305 | 0.002263376 | hypothetical protein                                 |
| TGME49_217880 | -8.05 | 4.80 | 0.000522203 | 0.002264993 | RNA-binding protein Nova-1, putative                 |
| TGME49_290180 | 2.38  | 5.13 | 0.000526683 | 0.002281367 | AP2 domain transcription factor AP2IX-6              |
| TGME49_267140 | -8.08 | 4.84 | 0.000527864 | 0.002285146 | SAG-related sequence SRS38B                          |

|               |       |      |             |             |                                                     |
|---------------|-------|------|-------------|-------------|-----------------------------------------------------|
| TGME49_230520 | -1.22 | 6.96 | 0.000532586 | 0.002304238 | cyclophilin 1, putative                             |
| TGME49_291010 | 2.02  | 5.14 | 0.000536255 | 0.002317545 | hypothetical protein                                |
| TGME49_301350 | -8.10 | 4.95 | 0.000536289 | 0.002317545 | SNARE associated protein                            |
| TGME49_285520 | -3.38 | 5.20 | 0.000538386 | 0.002325248 | RNA cap guanine-N2 methyltransferase                |
| TGME49_249820 | -2.67 | 5.81 | 0.000541859 | 0.002338882 | ATP-binding cassette sub-family B member 5          |
| TGME49_208730 | -1.15 | 8.92 | 0.000543215 | 0.002343366 | microneme protein, putative                         |
| TGME49_314000 | 1.22  | 6.33 | 0.000544045 | 0.002345579 | peptide methionine sulfoxide reductase msrB, put    |
| TGME49_216760 | -8.06 | 4.80 | 0.000546123 | 0.002353165 | RNA pseudouridine synthase superfamily protein      |
| TGME49_314970 | -1.21 | 7.24 | 0.000548489 | 0.002361987 | root hair defective 3 gtp-binding protein (rhd3) pr |
| TGME49_258850 | -8.04 | 4.82 | 0.000550175 | 0.002367867 | hypothetical protein                                |
| TGME49_220110 | 1.72  | 5.05 | 0.000550997 | 0.002370026 | hypothetical protein                                |
| TGME49_321660 | -3.42 | 4.88 | 0.000555026 | 0.002385964 | mannosyltransferase, putative                       |
| TGME49_319950 | -1.79 | 5.79 | 0.000556686 | 0.002390524 | rRNA-processing protein FCF1, putative              |
| TGME49_244610 | -3.34 | 5.46 | 0.000556733 | 0.002390524 | zinc finger, C3HC4 type (RING finger) domain-cont   |
| TGME49_288840 | 1.74  | 7.58 | 0.000559293 | 0.002400123 | hypothetical protein                                |
| TGME49_205625 | -3.38 | 5.09 | 0.000561014 | 0.002404718 | hypothetical protein                                |
| TGME49_219850 | -1.44 | 8.47 | 0.000568308 | 0.00243316  | prolyl-tRNA synthetase (ProRS)                      |
| TGME49_281910 | 1.12  | 6.18 | 0.000569217 | 0.002435641 | hypothetical protein                                |
| TGME49_226540 | 1.29  | 6.38 | 0.000569598 | 0.002435862 | protein kinase                                      |
| TGME49_233310 | -3.35 | 5.31 | 0.000569959 | 0.002435997 | peptidase D, putative                               |
| TGME49_268280 | -1.09 | 7.38 | 0.000572146 | 0.002443934 | 'chromo' (CHRromatin Organization MODifier) dor     |
| TGME49_231200 | -2.31 | 6.19 | 0.000574134 | 0.002445462 | hypothetical protein                                |
| TGME49_253020 | -2.34 | 6.02 | 0.000574064 | 0.002445462 | hypothetical protein                                |
| TGME49_297140 | -2.67 | 5.78 | 0.00057345  | 0.002445462 | U6 snRNA-associated sm family protein Lsm2, put     |
| TGME49_318300 | -2.67 | 5.50 | 0.000572951 | 0.002445462 | hypothetical protein                                |
| TGME49_309050 | -8.03 | 4.88 | 0.000574158 | 0.002445462 | hypothetical protein                                |
| TGME49_264030 | -1.62 | 6.63 | 0.000575264 | 0.002448764 | aminotransferase, putative                          |
| TGME49_203620 | -3.35 | 5.21 | 0.000588604 | 0.002501231 | hypothetical protein                                |
| TGME49_222840 | 1.50  | 8.70 | 0.000591496 | 0.002512073 | Ser/Thr phosphatase family protein                  |
| TGME49_236780 | -3.35 | 5.28 | 0.000594156 | 0.002521924 | zinc finger, C3HC4 type (RING finger) domain-cont   |
| TGME49_228230 | 1.08  | 9.12 | 0.000596173 | 0.00252903  | hypothetical protein                                |
| TGME49_243410 | -3.35 | 5.61 | 0.000599365 | 0.002541113 | tetratricopeptide repeat-containing protein         |
| TGME49_219300 | 1.39  | 5.66 | 0.000601019 | 0.002546669 | ran binding protein                                 |
| TGME49_313160 | -2.67 | 5.73 | 0.000605155 | 0.002561257 | hypothetical protein                                |
| TGME49_270150 | -2.67 | 5.78 | 0.000605047 | 0.002561257 | hypothetical protein                                |
| TGME49_253490 | 1.69  | 7.37 | 0.000606529 | 0.002565605 | hypothetical protein                                |
| TGME49_300280 | -2.36 | 5.77 | 0.000609087 | 0.002574951 | LSM domain-containing protein                       |
| TGME49_206605 | 1.58  | 5.59 | 0.000614547 | 0.002596547 | hypothetical protein                                |
| TGME49_204060 | -2.67 | 5.60 | 0.000619393 | 0.00261553  | SNARE domain-containing protein                     |
| TGME49_295850 | -1.16 | 7.27 | 0.000621787 | 0.002624139 | cyclic nucleotide-binding domain-containing prote   |
| TGME49_278550 | -1.98 | 6.00 | 0.000622749 | 0.002626701 | elongation factor Tu GTP binding domain-containi    |
| TGME49_215490 | -1.27 | 8.43 | 0.000624165 | 0.002631172 | transporter, major facilitator family protein       |
| TGME49_200330 | -1.65 | 6.65 | 0.000626292 | 0.002638635 | hypothetical protein                                |
| TGME49_239320 | -7.99 | 4.74 | 0.000628142 | 0.002643417 | BolA family protein                                 |
| TGME49_275780 | -7.99 | 4.85 | 0.000627979 | 0.002643417 | hypothetical protein                                |
| TGME49_202080 | -7.99 | 4.81 | 0.000629479 | 0.002644792 | hypothetical protein                                |
| TGME49_203010 | -1.15 | 7.22 | 0.000630523 | 0.002647408 | aurora kinase                                       |
| TGME49_216240 | -1.77 | 6.30 | 0.000632197 | 0.002651426 | hypothetical protein                                |
| TGME49_315590 | -2.07 | 5.93 | 0.000632809 | 0.002652489 | macro domain-containing protein                     |
| TGME49_228030 | 1.87  | 4.77 | 0.000634017 | 0.002655314 | hypothetical protein                                |
| TGME49_297760 | -7.99 | 5.12 | 0.000634561 | 0.002655314 | hypothetical protein                                |
| TGME49_255160 | -7.99 | 5.35 | 0.000635328 | 0.002657024 | hypothetical protein                                |
| TGME49_260420 | -1.77 | 6.17 | 0.000636048 | 0.00265853  | HEC/Ndc80p family protein                           |
| TGME49_235420 | -1.16 | 7.24 | 0.000638889 | 0.002668897 | hypothetical protein                                |



|               |       |      |             |             |                                                   |
|---------------|-------|------|-------------|-------------|---------------------------------------------------|
| TGME49_268910 | 1.28  | 5.89 | 0.000639558 | 0.002670181 | signal peptidase I protein                        |
| TGME49_215070 | 1.03  | 6.64 | 0.000643134 | 0.002683596 | ferodoxin FD                                      |
| TGME49_228980 | -8.00 | 5.06 | 0.000647855 | 0.002701769 | hypothetical protein                              |
| TGME49_268750 | -3.35 | 5.37 | 0.000648414 | 0.00270258  | peptidyl-prolyl cis-trans isomerase E, putative   |
| TGME49_224810 | -3.54 | 5.52 | 0.000665758 | 0.002771742 | hypothetical protein                              |
| TGME49_264420 | 4.88  | 4.97 | 0.000667359 | 0.002776843 | lipoprotein, putative                             |
| TGME49_232960 | -1.60 | 6.61 | 0.000678323 | 0.002819292 | oxidoreductase, 2OG-Fe(II) oxygenase family prote |
| TGME49_218370 | -2.06 | 5.98 | 0.000684813 | 0.002842158 | hypothetical protein                              |
| TGME49_294020 | -7.99 | 5.25 | 0.000684978 | 0.002842158 | zinc finger, C3HC4 type (RING finger) domain-cont |
| TGME49_321550 | 1.09  | 6.54 | 0.000689113 | 0.002857714 | hypothetical protein                              |
| TGME49_249020 | -2.07 | 6.04 | 0.000691183 | 0.002863819 | kinesin motor domain-containing protein           |
| TGME49_250500 | -3.37 | 5.36 | 0.000691941 | 0.002864619 | hypothetical protein                              |
| TGME49_226090 | -3.34 | 5.05 | 0.000693128 | 0.002867929 | DEAD/DEAH box helicase domain-containing prote    |
| TGME49_234300 | 1.28  | 6.14 | 0.000695626 | 0.002873627 | hypothetical protein                              |
| TGME49_218800 | -8.01 | 4.77 | 0.000695671 | 0.002873627 | hypothetical protein                              |
| TGME49_305920 | -3.30 | 5.44 | 0.000698405 | 0.002883308 | endonuclease III family 1 protein                 |
| TGME49_211470 | 1.56  | 5.17 | 0.000699421 | 0.002885892 | Fcf2 pre-rRNA processing protein                  |
| TGME49_299015 | -8.24 | 4.85 | 0.000702539 | 0.002897142 | hypothetical protein                              |
| TGME49_213445 | -1.70 | 7.01 | 0.000703053 | 0.002897644 | hypothetical protein                              |
| TGME49_265380 | -2.07 | 5.88 | 0.000704737 | 0.002901491 | tetratricopeptide repeat (TPR)-/ U-box domain-co  |
| TGME49_319570 | -1.68 | 6.69 | 0.000711871 | 0.002925834 | WD domain, G-beta repeat-containing protein       |
| TGME49_213590 | -1.24 | 6.96 | 0.000713157 | 0.002929457 | hypothetical protein                              |
| TGME49_289910 | -1.33 | 7.86 | 0.000716668 | 0.002940647 | hypothetical protein                              |
| TGME49_215520 | -1.24 | 6.78 | 0.000719164 | 0.002947614 | hypothetical protein                              |
| TGME49_257170 | -3.30 | 5.13 | 0.000725515 | 0.002970354 | hypothetical protein                              |
| TGME49_228630 | -1.22 | 7.14 | 0.000731057 | 0.002989025 | hypothetical protein                              |
| TGME49_290640 | -1.34 | 7.98 | 0.000731288 | 0.002989025 | DNA mismatch repair protein MSH6-1, putative      |
| TGME49_238410 | -2.63 | 5.77 | 0.000731094 | 0.002989025 | hypothetical protein                              |
| TGME49_215060 | -1.26 | 7.25 | 0.000732477 | 0.002990575 | small GTP-binding protein sar1, putative          |
| TGME49_320460 | -3.30 | 5.29 | 0.000732298 | 0.002990575 | ABC transporter transmembrane region domain-c     |
| TGME49_254200 | -7.98 | 4.78 | 0.000735589 | 0.00299713  | anticodon binding domain-containing protein       |
| TGME49_203160 | 1.32  | 6.00 | 0.000736895 | 0.003000332 | hypothetical protein                              |
| TGME49_247680 | 1.68  | 5.57 | 0.000751814 | 0.003056028 | hypothetical protein                              |
| TGME49_282130 | -2.28 | 5.72 | 0.000752302 | 0.003056332 | hypothetical protein                              |
| TGME49_311150 | -3.31 | 5.60 | 0.000754659 | 0.003062541 | hypothetical protein                              |
| TGME49_222910 | -1.50 | 6.45 | 0.000758058 | 0.003074646 | phosphoglycerate mutase                           |
| TGME49_285272 | -7.99 | 4.73 | 0.000759518 | 0.003077908 | hypothetical protein                              |
| TGME49_281900 | -1.14 | 7.26 | 0.000762017 | 0.003083936 | SET domain containing lysine methyltransferase K  |
| TGME49_288330 | -3.30 | 5.36 | 0.000761907 | 0.003083936 | histone lysine methyltransferase, SET, putative   |
| TGME49_247930 | -7.98 | 4.68 | 0.000766677 | 0.003101098 | SNARE domain-containing protein                   |
| TGME49_226280 | 1.72  | 5.02 | 0.000771463 | 0.003117967 | ribosomal protein L28, putative                   |
| TGME49_216750 | 1.04  | 6.92 | 0.000771691 | 0.003117967 | Paf1/RNA polymerase II complex component LEO1     |
| TGME49_271930 | -1.16 | 8.59 | 0.000772394 | 0.003119103 | hypothetical protein                              |
| TGME49_209210 | -1.63 | 6.84 | 0.000778608 | 0.003142481 | hypothetical protein                              |
| TGME49_301400 | 1.16  | 9.99 | 0.000784662 | 0.003165189 | hypothetical protein                              |
| TGME49_312520 | -3.33 | 5.37 | 0.000789269 | 0.003182037 | tRNA dimethylallyltransferase                     |
| TGME49_305870 | -2.64 | 5.28 | 0.000794487 | 0.003196101 | DAD family protein                                |
| TGME49_226270 | -2.66 | 5.82 | 0.00079401  | 0.003196101 | hypothetical protein                              |
| TGME49_278230 | -3.30 | 5.10 | 0.000795126 | 0.003196933 | prenyltransferase and squalene oxidase repeat-co  |
| TGME49_243200 | -1.25 | 9.17 | 0.000797132 | 0.003201516 | hypothetical protein                              |
| TGME49_289720 | -1.65 | 6.27 | 0.000796708 | 0.003201516 | hypothetical protein                              |
| TGME49_222240 | -1.28 | 6.92 | 0.000798757 | 0.003204564 | hypothetical protein                              |
| TGME49_294250 | -1.87 | 6.17 | 0.000798599 | 0.003204564 | WD domain, G-beta repeat-containing protein       |
| TGME49_311625 | -2.04 | 5.92 | 0.00080497  | 0.003227737 | WD domain, G-beta repeat-containing protein       |

|               |       |      |             |             |                                                      |
|---------------|-------|------|-------------|-------------|------------------------------------------------------|
| TGME49_323110 | 1.18  | 6.09 | 0.000807006 | 0.003234148 | hypothetical protein                                 |
| TGME49_278160 | -3.34 | 5.32 | 0.000815731 | 0.003262041 | vesicle transport v-snare protein                    |
| TGME49_305540 | -1.56 | 6.49 | 0.000823147 | 0.00328992  | hypothetical protein                                 |
| TGME49_236630 | -1.03 | 7.56 | 0.000827843 | 0.0033069   | hypothetical protein                                 |
| TGME49_285810 | -7.92 | 4.79 | 0.000829788 | 0.00331288  | MYND finger domain-containing protein                |
| TGME49_290310 | -2.04 | 5.87 | 0.000833073 | 0.003323778 | hypothetical protein                                 |
| TGME49_232680 | 1.24  | 6.24 | 0.000835118 | 0.003326972 | hypothetical protein                                 |
| TGME49_291590 | -7.92 | 4.86 | 0.000836947 | 0.003332466 | hypothetical protein                                 |
| TGME49_295040 | -1.04 | 7.94 | 0.000839069 | 0.003339114 | HEAT repeat-containing protein                       |
| TGME49_251710 | 1.67  | 5.03 | 0.000841468 | 0.003345061 | hypothetical protein                                 |
| TGME49_278250 | 1.78  | 5.20 | 0.000844481 | 0.003353431 | hypothetical protein                                 |
| TGME49_270190 | -2.73 | 5.63 | 0.000844109 | 0.003353431 | protein phosphatase 2C domain-containing protei      |
| TGME49_246130 | 1.18  | 8.21 | 0.000869336 | 0.00344715  | serpin (serine proteinase inhibitor) superfamily pr  |
| TGME49_211230 | -1.40 | 6.73 | 0.00086948  | 0.00344715  | eukaryotic initiation factor-2B, alpha subunit, puta |
| TGME49_258450 | -1.18 | 6.92 | 0.000870351 | 0.003448755 | hypothetical protein                                 |
| TGME49_249890 | 1.63  | 5.11 | 0.000872453 | 0.003453383 | hypothetical protein                                 |
| TGME49_211640 | 1.08  | 6.52 | 0.000872266 | 0.003453383 | hypothetical protein                                 |
| TGME49_284540 | -1.11 | 7.47 | 0.000873037 | 0.003453844 | ATP synthase F1, delta subunit protein               |
| TGME49_232750 | -1.19 | 6.83 | 0.000878354 | 0.003473022 | 23S rRNA (adenine(1618)-N(6))-methyltransferase      |
| TGME49_254660 | 1.09  | 6.94 | 0.000881476 | 0.003483503 | ankyrin repeat-containing protein                    |
| TGME49_311220 | -1.93 | 6.31 | 0.000886255 | 0.003500516 | hypothetical protein                                 |
| TGME49_216510 | -3.26 | 5.85 | 0.000899896 | 0.003541155 | thioredoxin, putative                                |
| TGME49_212940 | -7.92 | 5.88 | 0.000899693 | 0.003541155 | hypothetical protein                                 |
| TGME49_201150 | -1.56 | 6.72 | 0.000908296 | 0.003568159 | heavy metal translocating P-type ATPase subfamil     |
| TGME49_263440 | -2.25 | 5.39 | 0.000908689 | 0.003568159 | hypothetical protein                                 |
| TGME49_260830 | -2.63 | 5.42 | 0.000922566 | 0.003618806 | hypothetical protein                                 |
| TGME49_255960 | -1.46 | 6.58 | 0.000930274 | 0.003643246 | hypothetical protein                                 |
| TGME49_210778 | -1.73 | 6.36 | 0.000931389 | 0.003645678 | hemimethylated DNA binding domain-containing         |
| TGME49_313960 | -3.31 | 5.10 | 0.000942469 | 0.003685148 | ribosomal protein L19 protein                        |
| TGME49_208440 | 1.08  | 7.83 | 0.000949168 | 0.003707423 | hypothetical protein                                 |
| TGME49_267530 | 1.84  | 4.71 | 0.000949852 | 0.003708135 | hypothetical protein                                 |
| TGME49_246990 | -2.60 | 5.31 | 0.000952628 | 0.003715048 | hypothetical protein                                 |
| TGME49_214380 | 1.51  | 5.41 | 0.00095736  | 0.003731533 | hypothetical protein                                 |
| TGME49_312660 | -2.01 | 5.79 | 0.000964458 | 0.00375524  | hypothetical protein                                 |
| TGME49_269320 | -7.92 | 5.04 | 0.000968371 | 0.003768493 | hypothetical protein                                 |
| TGME49_232000 | 1.02  | 8.49 | 0.000972524 | 0.003780674 | hypothetical protein                                 |
| TGME49_232970 | -3.26 | 5.07 | 0.000975977 | 0.003790113 | hypothetical protein                                 |
| TGME49_281980 | -1.28 | 6.99 | 0.000977942 | 0.003795751 | phosphatidate cytidyltransferase                     |
| TGME49_227050 | -3.26 | 5.12 | 0.000978597 | 0.003796301 | ATPase/histidine kinase/DNA gyrase B/HSP90 dom       |
| TGME49_320005 | -3.26 | 5.20 | 0.000980665 | 0.003802329 | hypothetical protein                                 |
| TGME49_297230 | -1.72 | 6.39 | 0.00098414  | 0.003813799 | Vps53 family, N-terminal protein                     |
| TGME49_243790 | -1.85 | 5.96 | 0.00099251  | 0.003838191 | SAG-related sequence SRS33                           |
| TGME49_269720 | 1.99  | 6.13 | 0.000998243 | 0.003856781 | hypothetical protein                                 |
| TGME49_207230 | -1.74 | 5.74 | 0.000999732 | 0.00385812  | hypothetical protein                                 |
| TGME49_239700 | -2.60 | 5.88 | 0.000999751 | 0.00385812  | regulator of chromosome condensation (RCC1) re       |
| TGME49_219170 | -1.55 | 6.59 | 0.001000477 | 0.003858909 | hypothetical protein                                 |
| TGME49_228170 | 1.28  | 9.27 | 0.001001007 | 0.003858938 | inner membrane complex protein IMC2A                 |
| TGME49_266810 | -1.31 | 6.87 | 0.00100985  | 0.003886952 | hypothetical protein                                 |
| TGME49_305020 | 1.21  | 6.21 | 0.001011258 | 0.003890346 | hypothetical protein                                 |
| TGME49_309770 | 1.00  | 6.78 | 0.001021348 | 0.003923165 | hypothetical protein                                 |
| TGME49_271800 | -1.50 | 6.27 | 0.001022442 | 0.003923165 | serine esterase (DUF676) protein                     |
| TGME49_316240 | -1.72 | 6.03 | 0.001021553 | 0.003923165 | hypothetical protein                                 |
| TGME49_202430 | 1.31  | 6.35 | 0.001032085 | 0.003954008 | hypothetical protein                                 |
| TGME49_214280 | -7.97 | 4.76 | 0.001038254 | 0.003975582 | phosphoadenosine phosphosulfate reductase fam        |

|               |       |       |             |             |                                                    |
|---------------|-------|-------|-------------|-------------|----------------------------------------------------|
| TGME49_289640 | 1.47  | 5.64  | 0.001042997 | 0.003991679 | hypothetical protein                               |
| TGME49_288900 | 1.61  | 5.12  | 0.001050152 | 0.004014904 | Yos1 family protein                                |
| TGME49_270595 | -1.69 | 6.90  | 0.00105096  | 0.004015369 | UBA/TS-N domain-containing protein                 |
| TGME49_203290 | 1.35  | 8.25  | 0.001052316 | 0.004016944 | hypothetical protein                               |
| TGME49_283800 | -1.89 | 6.25  | 0.001060654 | 0.004046686 | hypothetical protein                               |
| TGME49_248550 | -3.34 | 5.45  | 0.001063573 | 0.004055729 | SPX domain-containing protein                      |
| TGME49_228060 | -3.35 | 5.12  | 0.0010668   | 0.004065938 | hypothetical protein                               |
| TGME49_205050 | 2.54  | 6.18  | 0.001075985 | 0.004098834 | hypothetical protein                               |
| TGME49_211680 | -1.20 | 11.04 | 0.001092618 | 0.004155769 | protein disulfide isomerase                        |
| TGME49_275750 | -1.65 | 6.27  | 0.001094296 | 0.004160014 | small nuclear ribonucleoprotein E, putative        |
| TGME49_208050 | -2.27 | 5.98  | 0.001099128 | 0.004176234 | ABC transporter, putative                          |
| TGME49_240900 | 1.01  | 6.85  | 0.001100381 | 0.004178847 | AP2 domain transcription factor AP2VI-2            |
| TGME49_204550 | -2.60 | 5.62  | 0.001111712 | 0.004213222 | hypothetical protein                               |
| TGME49_288620 | 1.02  | 6.86  | 0.001112521 | 0.004214131 | Erv1 / Alr family protein                          |
| TGME49_209880 | -1.09 | 7.37  | 0.001113752 | 0.004216633 | glutamic acid-rcih protein, putative               |
| TGME49_204410 | -1.86 | 6.09  | 0.001115211 | 0.004219994 | endonuclease/exonuclease/phosphatase family p      |
| TGME49_254900 | -1.23 | 6.78  | 0.001118635 | 0.004230788 | proteasome subunit beta type 2, putative           |
| TGME49_219550 | -1.08 | 7.18  | 0.001130178 | 0.004270074 | dihydrolipoyllysine-residue succinyltransferase co |
| TGME49_233000 | -1.28 | 7.06  | 0.001144426 | 0.004312889 | KOW motif domain-containing protein                |
| TGME49_202640 | -7.85 | 4.76  | 0.001143603 | 0.004312889 | RNA pseudouridine synthase superfamily protein     |
| TGME49_220208 | -7.86 | 4.78  | 0.001142739 | 0.004312889 | hypothetical protein                               |
| TGME49_306950 | -7.97 | 4.67  | 0.001143948 | 0.004312889 | RAP domain-containing protein                      |
| TGME49_309390 | -7.85 | 4.72  | 0.001153544 | 0.004336946 | hypothetical protein                               |
| TGME49_277550 | -7.86 | 4.87  | 0.001153743 | 0.004336946 | UvrD/REP helicase domain-containing protein        |
| TGME49_246780 | -7.85 | 4.74  | 0.001158712 | 0.004351204 | hypothetical protein                               |
| TGME49_299150 | -7.85 | 5.15  | 0.001161849 | 0.004360766 | AP2 domain transcription factor AP2III-3           |
| TGME49_321640 | -1.74 | 6.09  | 0.001163604 | 0.004365138 | cell division protein CDC48AP                      |
| TGME49_298050 | -1.82 | 5.70  | 0.001184036 | 0.004437284 | hypothetical protein                               |
| TGME49_286740 | 2.43  | 5.13  | 0.001188454 | 0.004449332 | microneme-like protein                             |
| TGME49_276990 | -3.21 | 5.48  | 0.001192299 | 0.004461468 | cytochrome b5 family heme/steroid binding doma     |
| TGME49_232320 | -7.85 | 4.97  | 0.001205034 | 0.004500138 | hypothetical protein                               |
| TGME49_216530 | -7.86 | 4.90  | 0.001205068 | 0.004500138 | ribosome recycling factor protein                  |
| TGME49_288210 | 1.38  | 6.24  | 0.001214925 | 0.004534657 | PUL domain-containing protein                      |
| TGME49_215380 | -3.24 | 5.25  | 0.001229741 | 0.004580707 | hypothetical protein                               |
| TGME49_281675 | 1.77  | 4.86  | 0.001233826 | 0.00458946  | protein kinase, putative                           |
| TGME49_209740 | 1.57  | 5.20  | 0.001234503 | 0.00458946  | hypothetical protein                               |
| TGME49_243910 | 1.61  | 6.24  | 0.001242161 | 0.004615346 | Cof family hydrolase subfamily protein             |
| TGME49_239250 | 1.05  | 7.39  | 0.001243774 | 0.004619019 | diacylglycerol kinase, putative                    |
| TGME49_235402 | -7.86 | 4.70  | 0.001252615 | 0.004649517 | CorA family Mg2+ transporter protein               |
| TGME49_269710 | -1.12 | 7.22  | 0.001260956 | 0.004671097 | hypothetical protein                               |
| TGME49_290960 | -1.31 | 6.72  | 0.001260428 | 0.004671097 | pyruvate phosphate dikinase, pep/pyruvate bindir   |
| TGME49_247610 | 1.57  | 5.08  | 0.001262378 | 0.004674023 | small nuclear ribonucleoprotein E, putative        |
| TGME49_228000 | 1.14  | 6.36  | 0.00126429  | 0.00467876  | splicing factor 3A subunit 2, putative             |
| TGME49_321170 | 2.39  | 5.28  | 0.00126929  | 0.004694914 | Toxoplasma gondii family C protein                 |
| TGME49_214190 | 1.61  | 5.29  | 0.001275498 | 0.004715515 | SAG-related sequence SRS46                         |
| TGME49_310730 | -1.38 | 6.50  | 0.001279295 | 0.00472247  | hypothetical protein                               |
| TGME49_323100 | 1.22  | 6.67  | 0.001297135 | 0.004785935 | hypothetical protein                               |
| TGME49_288045 | -3.25 | 5.31  | 0.001301384 | 0.004799218 | hypothetical protein                               |
| TGME49_224620 | 1.22  | 5.92  | 0.00130666  | 0.004815647 | hypothetical protein                               |
| TGME49_297360 | -1.55 | 6.33  | 0.001307141 | 0.004815647 | hypothetical protein                               |
| TGME49_280590 | -3.28 | 4.77  | 0.001310937 | 0.004827224 | hypothetical protein                               |
| TGME49_242110 | -7.85 | 4.87  | 0.001327888 | 0.004882348 | rhoptyr kinase family protein ROP38                |
| TGME49_268000 | -2.56 | 5.44  | 0.001333211 | 0.004897051 | hypothetical protein                               |
| TGME49_263130 | 1.16  | 8.10  | 0.001336879 | 0.004908086 | citrate synthase, putative                         |

|               |       |      |             |             |                                                   |
|---------------|-------|------|-------------|-------------|---------------------------------------------------|
| TGME49_284050 | -1.53 | 6.47 | 0.001365252 | 0.005007277 | DEAD/DEAH box helicase domain-containing prote    |
| TGME49_275568 | -1.53 | 6.27 | 0.001368067 | 0.005015116 | GPI transamidase subunit PIG-U protein            |
| TGME49_203390 | -1.21 | 7.14 | 0.00137194  | 0.005026822 | CRAL/TRIO domain-containing protein               |
| TGME49_260310 | 1.50  | 5.29 | 0.001385808 | 0.005075118 | ATP-binding cassette transporter ABC.B1           |
| TGME49_244130 | -1.50 | 6.36 | 0.001419492 | 0.005183074 | hypothetical protein                              |
| TGME49_286640 | -3.20 | 4.82 | 0.00143133  | 0.005223719 | GTPase                                            |
| TGME49_218960 | -1.52 | 8.73 | 0.00143904  | 0.005246676 | AP2 domain transcription factor AP2XII-1          |
| TGME49_273500 | -2.28 | 5.42 | 0.001449593 | 0.005279947 | O-linked N-acetylglucosamine transferase          |
| TGME49_210380 | -1.33 | 6.73 | 0.001453893 | 0.005290398 | hypothetical protein                              |
| TGME49_266110 | 1.48  | 5.29 | 0.001457129 | 0.005299562 | DEAD/DEAH box helicase domain-containing prote    |
| TGME49_235700 | -1.43 | 6.40 | 0.001458855 | 0.005303232 | sedoheptulose-1,7-bisphosphatase                  |
| TGME49_204400 | -1.08 | 8.95 | 0.001461224 | 0.005309234 | ATPase synthase subunit alpha, putative           |
| TGME49_298020 | -1.25 | 6.88 | 0.001464292 | 0.005317767 | DEAD-family helicase                              |
| TGME49_262120 | -1.20 | 7.00 | 0.001467338 | 0.005326214 | IQ calmodulin-binding motif domain-containing pr  |
| TGME49_310802 | 1.17  | 5.93 | 0.001474044 | 0.005342936 | CRAL/TRIO domain-containing protein               |
| TGME49_233680 | -7.78 | 5.02 | 0.001474113 | 0.005342936 | nuclear movement family protein                   |
| TGME49_223125 | -1.80 | 6.12 | 0.001476835 | 0.005350181 | ubiquitin family protein                          |
| TGME49_241840 | 1.44  | 6.62 | 0.001489043 | 0.005377601 | hypothetical protein                              |
| TGME49_269250 | -1.11 | 7.17 | 0.001488295 | 0.005377601 | Mov34/MPN/PAD-1 family protein                    |
| TGME49_211410 | -3.17 | 5.74 | 0.001487967 | 0.005377601 | translation initiation factor sui1 protein        |
| TGME49_301300 | -7.78 | 4.71 | 0.001486325 | 0.005377601 | hypothetical protein                              |
| TGME49_314460 | -7.78 | 4.78 | 0.001488758 | 0.005377601 | hypothetical protein                              |
| TGME49_278770 | -1.17 | 7.22 | 0.001499134 | 0.005404483 | hypothetical protein                              |
| TGME49_307800 | 1.62  | 6.04 | 0.001502457 | 0.005413824 | GDA1/CD39 (nucleoside phosphatase) family prot    |
| TGME49_218280 | -1.01 | 7.67 | 0.001510625 | 0.005438002 | eukaryotic porin, putative                        |
| TGME49_259000 | -7.78 | 4.76 | 0.001510638 | 0.005438002 | hypothetical protein                              |
| TGME49_237110 | -1.57 | 6.30 | 0.001518802 | 0.005462073 | replication factor C subunit 2, putative          |
| TGME49_261940 | -7.78 | 4.88 | 0.001521181 | 0.00546797  | hydrolase, alpha/beta fold family protein         |
| TGME49_263230 | -1.19 | 6.78 | 0.001527089 | 0.005486539 | hypothetical protein                              |
| TGME49_223560 | -2.58 | 5.14 | 0.001538308 | 0.0055188   | hypothetical protein                              |
| TGME49_263210 | -7.78 | 5.06 | 0.001543755 | 0.005532972 | ubiquitin interaction motif domain-containing pro |
| TGME49_259650 | -3.21 | 4.78 | 0.001545643 | 0.005537056 | hypothetical protein                              |
| TGME49_252490 | -1.96 | 5.95 | 0.001569464 | 0.00561423  | vacuolar protein sorting 29, putative             |
| TGME49_261780 | 1.11  | 8.77 | 0.00157895  | 0.00563998  | microneme protein MIC7                            |
| TGME49_254650 | 1.46  | 5.56 | 0.001586504 | 0.005663464 | zinc finger protein                               |
| TGME49_256090 | -7.77 | 4.73 | 0.001587057 | 0.005663464 | glycerophosphodiester phosphodiesterase family    |
| TGME49_228460 | -1.69 | 6.12 | 0.001594839 | 0.005688488 | hypothetical protein                              |
| TGME49_300130 | 1.76  | 4.71 | 0.001616039 | 0.005753006 | apical membrane antigen 1 domain-containing pro   |
| TGME49_271430 | -3.16 | 5.38 | 0.00162016  | 0.005763851 | hypothetical protein                              |
| TGME49_253800 | -3.20 | 5.03 | 0.001620645 | 0.005763851 | ribosomal protein L15, putative                   |
| TGME49_230150 | 1.31  | 6.16 | 0.001659664 | 0.005885638 | ChAPs (Chs5p-Arf1p-binding proteins) protein      |
| TGME49_277870 | -1.80 | 6.10 | 0.001662373 | 0.005886775 | hypothetical protein                              |
| TGME49_288930 | -1.97 | 6.16 | 0.001661836 | 0.005886775 | hypothetical protein                              |
| TGME49_222410 | -1.36 | 6.72 | 0.001673509 | 0.005923373 | hypothetical protein                              |
| TGME49_210960 | -1.52 | 6.30 | 0.001676596 | 0.00593146  | replication factor C subunit 4, putative          |
| TGME49_225300 | -1.58 | 6.43 | 0.001681366 | 0.00594549  | hypothetical protein                              |
| TGME49_207160 | -1.95 | 5.87 | 0.001691343 | 0.005977912 | SAG-related sequence SRS49D                       |
| TGME49_248445 | -1.12 | 6.86 | 0.001697388 | 0.005990687 | hypothetical protein                              |
| TGME49_236140 | 1.78  | 4.81 | 0.001713369 | 0.006038442 | hypothetical protein                              |
| TGME49_290840 | -1.41 | 6.35 | 0.001722913 | 0.006069185 | serine protease                                   |
| TGME49_230860 | -1.96 | 6.09 | 0.00173639  | 0.006113747 | hypothetical protein                              |
| TGME49_230050 | 1.49  | 4.96 | 0.00176377  | 0.006202329 | 50S ribosomal protein L3, putative                |
| TGME49_248400 | -1.77 | 6.09 | 0.001764065 | 0.006202329 | glyoxalase I, putative                            |
| TGME49_254940 | 1.01  | 9.51 | 0.001770536 | 0.00622033  | MIF4G domain-containing protein                   |

|               |       |      |             |             |                                                     |
|---------------|-------|------|-------------|-------------|-----------------------------------------------------|
| TGME49_269800 | -2.16 | 5.58 | 0.001774158 | 0.006226508 | glutamine-dependent NAD(+) synthetase protein,      |
| TGME49_205720 | -7.77 | 4.68 | 0.001774311 | 0.006226508 | Adenosine/AMP deaminase domain-containing pr        |
| TGME49_221905 | -1.03 | 7.08 | 0.001780143 | 0.00624401  | hypothetical protein                                |
| TGME49_311380 | -3.43 | 5.26 | 0.001788531 | 0.00627046  | hypothetical protein                                |
| TGME49_218955 | 1.43  | 5.19 | 0.001796632 | 0.006292892 | hypothetical protein                                |
| TGME49_225910 | 1.16  | 5.95 | 0.001809118 | 0.006333627 | hypothetical protein                                |
| TGME49_283830 | 1.91  | 5.33 | 0.001811521 | 0.00633818  | type I inorganic pyrophosphatase PPase              |
| TGME49_213370 | 1.08  | 6.46 | 0.001812133 | 0.00633818  | formin FRM3                                         |
| TGME49_202230 | -1.55 | 5.96 | 0.001815013 | 0.006342252 | histone deacetylase HDAC5                           |
| TGME49_217560 | 1.08  | 6.35 | 0.001824468 | 0.006369272 | DNA-directed RNA polymerase II RPB10                |
| TGME49_257755 | 1.96  | 5.37 | 0.001829507 | 0.006383849 | hypothetical protein                                |
| TGME49_266320 | 1.01  | 6.57 | 0.001850071 | 0.006452559 | hypothetical protein                                |
| TGME49_309070 | 1.76  | 5.61 | 0.001853603 | 0.00646183  | hypothetical protein                                |
| TGME49_234470 | -1.77 | 5.77 | 0.001859246 | 0.006477202 | hypothetical protein                                |
| TGME49_258380 | -2.16 | 5.55 | 0.001859765 | 0.006477202 | elongation factor p (ef-p) kow family domain-cont   |
| TGME49_289510 | 1.23  | 5.65 | 0.001862925 | 0.006483085 | hypothetical protein                                |
| TGME49_202350 | -1.77 | 5.81 | 0.001863207 | 0.006483085 | 50S ribosomal protein L21, putative                 |
| TGME49_253540 | 1.43  | 5.28 | 0.00188764  | 0.006564679 | hypothetical protein                                |
| TGME49_215030 | -1.93 | 5.85 | 0.001888433 | 0.006564679 | hypothetical protein                                |
| TGME49_212800 | -1.42 | 6.53 | 0.001889685 | 0.006565945 | hypothetical protein                                |
| TGME49_248630 | -1.49 | 6.51 | 0.00189086  | 0.006566941 | actin-related protein ARP1                          |
| TGME49_264450 | -1.93 | 5.87 | 0.001907195 | 0.006620565 | DNA topoisomerase III beta-1, putative              |
| TGME49_217450 | 1.47  | 4.96 | 0.001925071 | 0.006679482 | general transcription factor IIH polypeptide 5 GTF  |
| TGME49_213890 | -7.79 | 5.03 | 0.001940931 | 0.006731354 | Myb family DNA-binding domain-containing prote      |
| TGME49_293060 | -1.68 | 6.24 | 0.001948743 | 0.006752112 | SPRY domain-containing protein                      |
| TGME49_276190 | -2.20 | 5.61 | 0.001969981 | 0.006816117 | hypothetical protein                                |
| TGME49_286180 | -7.70 | 4.90 | 0.001971246 | 0.006817302 | tRNA ligases class I (M) protein                    |
| TGME49_239300 | -1.55 | 6.35 | 0.001978754 | 0.006833368 | hypothetical protein                                |
| TGME49_273595 | -1.66 | 6.00 | 0.001984978 | 0.006851972 | hypothetical protein                                |
| TGME49_278170 | -2.17 | 5.42 | 0.001993541 | 0.006878322 | hypothetical protein                                |
| TGME49_294360 | -1.32 | 6.51 | 0.002004324 | 0.00690586  | ubiquitin specific protease 39 isoform 2, putative  |
| TGME49_309920 | -3.12 | 5.24 | 0.002009513 | 0.006920513 | hypothetical protein                                |
| TGME49_311740 | -2.16 | 5.52 | 0.002012726 | 0.006925126 | hypothetical protein                                |
| TGME49_288710 | 1.43  | 5.08 | 0.00201376  | 0.00692546  | hypothetical protein                                |
| TGME49_230830 | 1.48  | 5.63 | 0.002026905 | 0.006957722 | ATPase family associated with various cellular acti |
| TGME49_265070 | -2.50 | 5.58 | 0.002026691 | 0.006957722 | hypothetical protein                                |
| TGME49_227860 | -7.70 | 4.75 | 0.002025411 | 0.006957722 | hypothetical protein                                |
| TGME49_248110 | 1.24  | 7.91 | 0.002035391 | 0.006980371 | hypothetical protein                                |
| TGME49_297690 | 1.18  | 6.06 | 0.002046978 | 0.007013933 | hypothetical protein                                |
| TGME49_209950 | -1.12 | 9.03 | 0.002054176 | 0.007035007 | thioredoxin, putative                               |
| TGME49_244570 | -7.71 | 4.81 | 0.002057023 | 0.007036941 | hypothetical protein                                |
| TGME49_270760 | -7.72 | 4.79 | 0.002056775 | 0.007036941 | asparagine synthase                                 |
| TGME49_209120 | 1.31  | 6.06 | 0.002059735 | 0.007040998 | hypothetical protein                                |
| TGME49_309880 | -1.33 | 6.92 | 0.002063303 | 0.007049935 | hypothetical protein                                |
| TGME49_265460 | 1.09  | 6.01 | 0.002070054 | 0.007066471 | hypothetical protein                                |
| TGME49_263505 | -3.14 | 5.15 | 0.002072431 | 0.007071322 | hypothetical protein                                |
| TGME49_294060 | -1.05 | 7.47 | 0.002088546 | 0.007123019 | hypothetical protein                                |
| TGME49_249870 | -1.27 | 6.54 | 0.002091526 | 0.00712661  | hypothetical protein                                |
| TGME49_271240 | -2.48 | 5.16 | 0.002112405 | 0.007194437 | hypothetical protein                                |
| TGME49_271990 | 1.28  | 6.11 | 0.002122379 | 0.007221755 | hypothetical protein                                |
| TGME49_242810 | -3.14 | 5.22 | 0.002121873 | 0.007221755 | hypothetical protein                                |
| TGME49_280450 | -7.69 | 4.79 | 0.002130667 | 0.00724662  | hypothetical protein                                |
| TGME49_288860 | -2.73 | 6.98 | 0.002141373 | 0.007272994 | RuvB family 2 protein                               |
| TGME49_214990 | -1.75 | 5.69 | 0.002146899 | 0.007285073 | hypothetical protein                                |

|               |       |       |             |             |                                                   |
|---------------|-------|-------|-------------|-------------|---------------------------------------------------|
| TGME49_221390 | -1.75 | 5.94  | 0.002157904 | 0.007315701 | hypothetical protein                              |
| TGME49_305800 | -1.75 | 5.93  | 0.002168015 | 0.007343246 | 6-pyruvoyl tetrahydrobiopterin synthase           |
| TGME49_294730 | -1.50 | 6.29  | 0.002181819 | 0.007386616 | hypothetical protein                              |
| TGME49_263480 | -1.46 | 6.10  | 0.002182983 | 0.007387174 | sodium/hydrogen exchanger 3 protein               |
| TGME49_201800 | -1.16 | 7.11  | 0.002198943 | 0.007430982 | hypothetical protein                              |
| TGME49_269770 | -2.48 | 5.57  | 0.00220892  | 0.007461286 | WD domain, G-beta repeat-containing protein       |
| TGME49_213040 | -1.54 | 6.26  | 0.002222466 | 0.007503613 | hypothetical protein                              |
| TGME49_308090 | 1.09  | 10.07 | 0.002230279 | 0.007526556 | rhoptry protein ROP5                              |
| TGME49_235880 | 1.02  | 7.78  | 0.002232383 | 0.00753022  | brain protein 44 family protein                   |
| TGME49_258970 | 1.01  | 6.74  | 0.002245838 | 0.007568699 | hypothetical protein                              |
| TGME49_286270 | -1.54 | 6.58  | 0.002260753 | 0.007615493 | hypothetical protein                              |
| TGME49_263190 | -3.12 | 4.74  | 0.002274312 | 0.007654193 | adenylosuccinate lyase, putative                  |
| TGME49_227300 | 1.82  | 4.84  | 0.002296158 | 0.007720688 | hypothetical protein                              |
| TGME49_304750 | -2.13 | 5.37  | 0.002317787 | 0.007789872 | zinc finger, C3HC4 type (RING finger) domain-cont |
| TGME49_232630 | -1.10 | 8.33  | 0.002325238 | 0.007809889 | hypothetical protein                              |
| TGME49_301170 | -7.68 | 5.92  | 0.002346722 | 0.007869235 | SAG-related sequence SRS19D                       |
| TGME49_220440 | -1.93 | 5.93  | 0.002368574 | 0.007935313 | cyclin-dependent kinase regulatory subunit protei |
| TGME49_265650 | -3.11 | 5.20  | 0.002411592 | 0.008064817 | protein phosphatase 2C domain-containing protei   |
| TGME49_234420 | -1.37 | 6.17  | 0.002427592 | 0.008107323 | ATPase, AAA family protein                        |
| TGME49_214400 | -2.45 | 5.11  | 0.002426676 | 0.008107323 | hypothetical protein                              |
| TGME49_272730 | 1.81  | 4.78  | 0.002438223 | 0.008134155 | hypothetical protein                              |
| TGME49_245710 | -1.15 | 6.93  | 0.002439462 | 0.008134155 | phosphatidylinositol-4-phosphate 5-kinase, putati |
| TGME49_208722 | -3.11 | 5.29  | 0.002440026 | 0.008134155 | hypothetical protein                              |
| TGME49_217760 | 1.21  | 5.84  | 0.002453705 | 0.008168706 | GTP-binding protein                               |
| TGME49_231930 | -3.15 | 4.73  | 0.0024809   | 0.008251811 | hypothetical protein                              |
| TGME49_214530 | -1.60 | 6.38  | 0.002492353 | 0.008286176 | DnaJ domain-containing protein                    |
| TGME49_225110 | 1.03  | 6.39  | 0.002495409 | 0.008292609 | AP2 domain transcription factor AP2X-2            |
| TGME49_216580 | -1.64 | 6.03  | 0.002505245 | 0.008321555 | hypothetical protein                              |
| TGME49_248370 | 1.14  | 5.93  | 0.002513546 | 0.008345379 | prefoldin subunit 6, putative                     |
| TGME49_259600 | -1.75 | 5.75  | 0.002527706 | 0.008388627 | hypothetical protein                              |
| TGME49_254610 | 1.77  | 5.99  | 0.002531818 | 0.008398503 | Tim10/DDP family zinc finger superfamily protein  |
| TGME49_223480 | -7.62 | 5.77  | 0.002579972 | 0.008542907 | sushi domain (scr repeat) domain-containing prote |
| TGME49_319720 | -3.13 | 5.17  | 0.002584781 | 0.008555002 | hypothetical protein                              |
| TGME49_258930 | -2.46 | 4.82  | 0.002586214 | 0.008555914 | peptidylprolyl isomerase                          |
| TGME49_316520 | -1.37 | 6.34  | 0.002587949 | 0.008557824 | 1,4-alpha-glucan-branching enzyme                 |
| TGME49_209170 | -1.18 | 6.83  | 0.002600201 | 0.008582986 | hypothetical protein                              |
| TGME49_329800 | -1.37 | 6.84  | 0.002616519 | 0.008629146 | hypothetical protein                              |
| TGME49_270370 | -2.18 | 5.67  | 0.002617893 | 0.008629826 | clathrin assembly protein AP19, putative          |
| TGME49_218230 | -1.72 | 5.66  | 0.002627376 | 0.008657226 | histone lysine methyltransferase, SET, putative   |
| TGME49_220330 | -3.14 | 5.33  | 0.00262972  | 0.00866109  | hypothetical protein                              |
| TGME49_212930 | 1.81  | 5.60  | 0.002630913 | 0.008661163 | NifU family domain-containing protein             |
| TGME49_291690 | -3.07 | 5.09  | 0.00263256  | 0.008662727 | hypothetical protein                              |
| TGME49_200430 | -7.63 | 4.89  | 0.00265129  | 0.00872048  | cytidine and deoxycytidylate deaminase zinc-bindi |
| TGME49_208070 | -1.14 | 6.77  | 0.002662095 | 0.008742327 | inositol polyphosphate kinase                     |
| TGME49_301310 | 1.75  | 6.11  | 0.002667365 | 0.008753884 | hypothetical protein                              |
| TGME49_266800 | -1.61 | 6.24  | 0.002682046 | 0.008790357 | integral membrane protein, putative               |
| TGME49_224670 | -1.87 | 5.88  | 0.002690307 | 0.008813528 | DnaJ domain-containing protein                    |
| TGME49_245650 | 1.82  | 4.74  | 0.002712499 | 0.008870508 | hypothetical protein                              |
| TGME49_294190 | -3.07 | 5.22  | 0.002717812 | 0.008883953 | enoyl-CoA hydratase/isomerase family protein      |
| TGME49_225920 | -2.09 | 5.83  | 0.002719652 | 0.008886039 | hypothetical protein                              |
| TGME49_232210 | -7.62 | 5.03  | 0.002756624 | 0.008994916 | hypothetical protein                              |
| TGME49_247670 | -2.15 | 5.41  | 0.002796323 | 0.009108375 | ribulose-phosphate 3 epimerase family protein     |
| TGME49_263730 | -1.72 | 6.40  | 0.002803162 | 0.009122616 | FAD-dependent glycerol-3-phosphate dehydrogen     |
| TGME49_232270 | -7.62 | 5.79  | 0.002803032 | 0.009122616 | histidine acid phosphatase superfamily protein    |

|               |       |      |             |             |                                                   |
|---------------|-------|------|-------------|-------------|---------------------------------------------------|
| TGME49_315670 | -1.18 | 6.74 | 0.002808028 | 0.009125733 | HEAT repeat-containing protein                    |
| TGME49_262000 | -3.11 | 4.73 | 0.002809267 | 0.009125733 | AP2 domain transcription factor AP2VIIb-2         |
| TGME49_273550 | -3.06 | 5.26 | 0.002848761 | 0.009238482 | hypothetical protein                              |
| TGME49_249600 | -7.61 | 4.74 | 0.002848736 | 0.009238482 | hypothetical protein                              |
| TGME49_232530 | -2.09 | 5.46 | 0.002857213 | 0.00926183  | hypothetical protein                              |
| TGME49_309780 | -1.87 | 5.56 | 0.002858714 | 0.009262633 | hypothetical protein                              |
| TGME49_286010 | 1.27  | 5.83 | 0.002893716 | 0.009367837 | hypothetical protein                              |
| TGME49_218830 | 1.45  | 5.33 | 0.002926849 | 0.009458531 | hypothetical protein                              |
| TGME49_281450 | -2.45 | 5.45 | 0.002938536 | 0.009479953 | cell-cycle-associated protein kinase, putative    |
| TGME49_222160 | -3.06 | 4.97 | 0.002934804 | 0.009479953 | aldehyde dehydrogenase                            |
| TGME49_233540 | -3.16 | 5.15 | 0.002938015 | 0.009479953 | transporter, major facilitator family protein     |
| TGME49_252400 | 2.27  | 5.14 | 0.002944274 | 0.009489956 | HIT zinc finger protein                           |
| TGME49_221170 | -1.08 | 6.99 | 0.002943143 | 0.009489956 | CAAX metallo endopeptidase                        |
| TGME49_238940 | 1.86  | 4.73 | 0.002946499 | 0.00949299  | GDP mannose 4,6-dehydratase, putative             |
| TGME49_224490 | -3.09 | 5.05 | 0.002955621 | 0.009518232 | polyprenyl synthetase superfamily protein         |
| TGME49_287980 | -1.59 | 6.10 | 0.002964318 | 0.009542086 | FHA domain-containing protein                     |
| TGME49_251920 | 1.40  | 5.05 | 0.002976395 | 0.009576789 | hypothetical protein                              |
| TGME49_211650 | -1.30 | 6.23 | 0.002993362 | 0.009627193 | hypothetical protein                              |
| TGME49_251620 | 1.03  | 6.69 | 0.003010078 | 0.009676747 | flap structure-specific endonuclease 1, putative  |
| TGME49_221922 | -3.06 | 5.27 | 0.003044027 | 0.009777383 | NifU family domain-containing protein             |
| TGME49_272550 | -1.17 | 6.75 | 0.003048418 | 0.009787236 | hypothetical protein                              |
| TGME49_271440 | -2.41 | 5.43 | 0.003054959 | 0.009803979 | NPL4 family protein                               |
| TGME49_272710 | 1.08  | 7.14 | 0.00307878  | 0.009876139 | AP2 domain transcription factor AP2VIII-4         |
| TGME49_297330 | 1.28  | 5.60 | 0.003162558 | 0.01013906  | hypothetical protein                              |
| TGME49_288460 | -1.07 | 7.02 | 0.003165874 | 0.01014232  | hypothetical protein                              |
| TGME49_293310 | 1.04  | 6.76 | 0.00319676  | 0.0102324   | ribosomal protein L20, putative                   |
| TGME49_258650 | -2.41 | 5.11 | 0.003207778 | 0.010258783 | protoheme ferro-lyase, putative                   |
| TGME49_252270 | 1.74  | 6.10 | 0.003216579 | 0.010278042 | L1P family of ribosomal protein                   |
| TGME49_314030 | 1.88  | 5.75 | 0.003261487 | 0.010399068 | hypothetical protein                              |
| TGME49_206300 | -2.41 | 5.15 | 0.003260272 | 0.010399068 | hypothetical protein                              |
| TGME49_315360 | -1.30 | 6.61 | 0.003281684 | 0.010454448 | hypothetical protein                              |
| TGME49_258990 | -2.40 | 5.52 | 0.003283765 | 0.010456571 | bromodomain-containing protein                    |
| TGME49_249380 | 1.18  | 7.53 | 0.003321855 | 0.010573308 | DHHC zinc finger domain-containing protein        |
| TGME49_257990 | -1.24 | 6.77 | 0.003327257 | 0.010585946 | heat shock protein 101, putative                  |
| TGME49_269075 | -7.64 | 5.19 | 0.003335476 | 0.010607532 | hypothetical protein                              |
| TGME49_202730 | -2.08 | 5.45 | 0.003362422 | 0.010678497 | hypothetical protein                              |
| TGME49_246978 | -3.01 | 5.07 | 0.003365774 | 0.010680914 | hypothetical protein                              |
| TGME49_312220 | -3.02 | 5.27 | 0.003384403 | 0.010735426 | mitochondrial inner membrane translocase subun    |
| TGME49_250090 | 1.08  | 6.15 | 0.003398472 | 0.01077543  | hypothetical protein                              |
| TGME49_221460 | -1.18 | 6.68 | 0.003440236 | 0.010889172 | phosphoglycerate mutase family protein            |
| TGME49_243390 | -2.40 | 5.53 | 0.003448703 | 0.0109113   | hypothetical protein                              |
| TGME49_272720 | -1.85 | 5.62 | 0.003467454 | 0.010965935 | methyltransferase domain-containing protein       |
| TGME49_288010 | 1.77  | 5.10 | 0.003481067 | 0.011004278 | hypothetical protein                              |
| TGME49_246040 | -1.56 | 6.20 | 0.003483395 | 0.011006934 | MIF4G domain-containing protein                   |
| TGME49_240710 | -1.49 | 6.51 | 0.003505916 | 0.01106206  | RNA recognition motif-containing protein          |
| TGME49_274000 | -2.06 | 6.01 | 0.003506826 | 0.01106206  | hypothetical protein                              |
| TGME49_240800 | -1.41 | 6.86 | 0.00351998  | 0.011084638 | MORN repeat-containing protein                    |
| TGME49_264820 | 1.31  | 6.38 | 0.003525905 | 0.011093846 | RbAp48                                            |
| TGME49_243350 | 1.47  | 6.80 | 0.003529872 | 0.011098977 | gamma-glutamyl hydrolase                          |
| TGME49_276130 | 1.13  | 6.47 | 0.003536712 | 0.011104329 | cathepsin CPC2                                    |
| TGME49_246690 | -2.05 | 5.40 | 0.003538247 | 0.011104329 | alpha amylase, catalytic domain-containing protei |
| TGME49_308940 | -7.53 | 4.89 | 0.00353605  | 0.011104329 | hypothetical protein                              |
| TGME49_209140 | -1.16 | 6.82 | 0.003543448 | 0.011115932 | anti-silencing protein, ASF1 family protein       |
| TGME49_313300 | 1.14  | 5.75 | 0.003571872 | 0.011200347 | YL1 nuclear protein C-terminal domain-containing  |

|               |       |       |             |             |                                                     |
|---------------|-------|-------|-------------|-------------|-----------------------------------------------------|
| TGME49_263150 | -7.53 | 4.96  | 0.00365051  | 0.011417882 | tetratricopeptide repeat-containing protein         |
| TGME49_227640 | -1.39 | 6.07  | 0.003669526 | 0.011467658 | hypothetical protein                                |
| TGME49_231940 | -1.43 | 6.36  | 0.003704096 | 0.011570801 | ThiF family protein                                 |
| TGME49_300010 | -7.54 | 4.88  | 0.003716226 | 0.011589109 | hypothetical protein                                |
| TGME49_249850 | -1.57 | 10.25 | 0.003739433 | 0.01165165  | GAP40 protein                                       |
| TGME49_266930 | 1.35  | 5.42  | 0.003750203 | 0.011677001 | general transcription factor IIH polypeptide 3 GTF2 |
| TGME49_253820 | 1.02  | 8.07  | 0.003823493 | 0.011873543 | hypothetical protein                                |
| TGME49_229720 | -2.36 | 5.39  | 0.003826714 | 0.011878559 | hypothetical protein                                |
| TGME49_270330 | 1.28  | 6.26  | 0.003835786 | 0.011886758 | cell-cycle-associated protein kinase, putative      |
| TGME49_312360 | -3.00 | 4.90  | 0.003878168 | 0.012013061 | hypothetical protein                                |
| TGME49_311260 | -1.07 | 6.78  | 0.003889335 | 0.012042606 | myosin light chain MLC1, putative                   |
| TGME49_277090 | 2.01  | 7.62  | 0.003900406 | 0.012071831 | carrier superfamily protein                         |
| TGME49_277010 | -7.53 | 4.90  | 0.003903771 | 0.012077189 | Fe-S metabolism associated domain-containing pr     |
| TGME49_260840 | -3.00 | 4.88  | 0.003914153 | 0.012104244 | hypothetical protein                                |
| TGME49_236580 | -1.27 | 7.51  | 0.003966693 | 0.012256467 | Prp31-15.5k-U4 Snrna Complex family protein         |
| TGME49_256920 | 1.51  | 6.24  | 0.004090557 | 0.012618098 | phosphatidylinositol-4-phosphate 5-Kinase           |
| TGME49_241170 | -1.12 | 6.88  | 0.004119042 | 0.012684796 | hypothetical protein                                |
| TGME49_248200 | 1.30  | 6.31  | 0.004124083 | 0.012695035 | ribosomal RNA (adenine(1779)-N(6)/adenine(1780      |
| TGME49_226420 | -1.21 | 6.96  | 0.004164352 | 0.012813658 | peptidase family M3 protein                         |
| TGME49_221870 | 1.26  | 7.14  | 0.004180046 | 0.012856597 | hypothetical protein                                |
| TGME49_202480 | -2.96 | 5.11  | 0.00418808  | 0.012875953 | hypothetical protein                                |
| TGME49_228380 | 3.13  | 5.03  | 0.004217236 | 0.012954817 | hypothetical protein                                |
| TGME49_305190 | 1.02  | 6.71  | 0.004233208 | 0.012987694 | CorA family Mg <sup>2+</sup> transporter protein    |
| TGME49_213870 | -1.14 | 6.92  | 0.004231693 | 0.012987694 | UBA/TS-N domain-containing protein                  |
| TGME49_311750 | 1.96  | 5.91  | 0.004237632 | 0.012990485 | mago binding protein                                |
| TGME49_220160 | -2.96 | 5.04  | 0.00423701  | 0.012990485 | WD domain-containing protein                        |
| TGME49_235610 | -2.96 | 5.08  | 0.004252331 | 0.013030143 | ATPase, AAA family protein                          |
| TGME49_280522 | -1.16 | 6.97  | 0.004263687 | 0.013059529 | hypothetical protein                                |
| TGME49_244860 | 1.40  | 5.15  | 0.00426761  | 0.013066132 | hypothetical protein                                |
| TGME49_315640 | 1.32  | 5.20  | 0.004294912 | 0.013144281 | lipoyl(octanoyl) transferase                        |
| TGME49_294860 | -1.54 | 6.13  | 0.004297176 | 0.013145768 | hypothetical protein                                |
| TGME49_215480 | -1.81 | 5.60  | 0.004330572 | 0.013242451 | Adenosine/AMP deaminase domain-containing pr        |
| TGME49_285880 | 1.58  | 4.94  | 0.004359429 | 0.013319676 | hypothetical protein                                |
| TGME49_260150 | 1.60  | 4.92  | 0.004395175 | 0.013417806 | tetratricopeptide repeat-containing protein         |
| TGME49_314530 | -3.00 | 5.09  | 0.004431562 | 0.013517727 | RPAP1 family, C-terminal protein                    |
| TGME49_277820 | -2.36 | 5.23  | 0.004433629 | 0.013518455 | hypothetical protein                                |
| TGME49_310660 | -2.96 | 5.16  | 0.004439235 | 0.013529967 | Dullard family phosphatase domain-containing pr     |
| TGME49_250060 | 1.45  | 5.19  | 0.004442399 | 0.013534033 | DNA-directed RNA polymerase I RPA12                 |
| TGME49_306020 | -1.44 | 6.20  | 0.004449178 | 0.013549102 | hypothetical protein                                |
| TGME49_319710 | -1.38 | 6.22  | 0.004454468 | 0.013559629 | kinesin motor domain-containing protein             |
| TGME49_205240 | -1.13 | 6.70  | 0.004457099 | 0.013562053 | cleft lip and palate transmembrane protein 1 (clpt  |
| TGME49_203710 | -1.14 | 8.63  | 0.004475509 | 0.013595692 | AP2 domain transcription factor AP2Vlla-4           |
| TGME49_285700 | -2.99 | 4.70  | 0.004475298 | 0.013595692 | ubiquitin fusion degradation protein UFD1AP         |
| TGME49_306510 | 1.91  | 5.11  | 0.004478603 | 0.013599505 | hypothetical protein                                |
| TGME49_204100 | -1.27 | 6.50  | 0.004481417 | 0.013602461 | eIF2 kinase IF2K-C                                  |
| TGME49_271170 | -2.95 | 5.26  | 0.004485651 | 0.013609727 | dolichol kinase                                     |
| TGME49_244140 | -3.04 | 4.78  | 0.004499581 | 0.013646392 | hypothetical protein                                |
| TGME49_319930 | -1.25 | 6.40  | 0.004570028 | 0.013831676 | hypothetical protein                                |
| TGME49_277490 | 1.04  | 7.63  | 0.004577985 | 0.013850091 | hypothetical protein                                |
| TGME49_219750 | 1.10  | 8.48  | 0.004619953 | 0.013965629 | cytochrome c, putative                              |
| TGME49_315190 | -1.06 | 6.83  | 0.004618999 | 0.013965629 | CAM kinase, SNF1 family                             |
| TGME49_226060 | 1.15  | 6.99  | 0.004639471 | 0.0140189   | transmembrane amino acid transporter protein        |
| TGME49_311390 | 1.35  | 5.11  | 0.004647562 | 0.014037612 | tRNA (guanine(9)-N(1))-methyltransferase            |
| TGME49_235905 | -2.32 | 5.09  | 0.004689275 | 0.014140496 | ribonuclease z, putative                            |



|               |       |      |             |             |                                                           |
|---------------|-------|------|-------------|-------------|-----------------------------------------------------------|
| TGME49_319320 | -1.38 | 6.45 | 0.004696964 | 0.014157908 | hypothetical protein                                      |
| TGME49_270670 | 1.17  | 5.21 | 0.004716237 | 0.014204422 | hypothetical protein                                      |
| TGME49_240430 | 1.18  | 5.61 | 0.004724828 | 0.014218715 | glyoxalase family protein                                 |
| TGME49_315920 | -2.01 | 5.33 | 0.004724417 | 0.014218715 | DNA-directed RNA polymerase II RPB11A                     |
| TGME49_310210 | 1.03  | 6.10 | 0.004735919 | 0.014246291 | hypothetical protein                                      |
| TGME49_203050 | 1.92  | 6.44 | 0.004781122 | 0.014358903 | AP2 domain transcription factor AP2VIIa-6                 |
| TGME49_237195 | 1.68  | 4.95 | 0.004808671 | 0.014412368 | hypothetical protein                                      |
| TGME49_320690 | -1.64 | 5.76 | 0.004820425 | 0.014441742 | gamma-soluble NSF attachment protein, putative            |
| TGME49_309940 | -1.54 | 5.91 | 0.004832276 | 0.014465526 | phospholipase D active site domain-containing protein     |
| TGME49_246178 | -1.78 | 5.82 | 0.004843127 | 0.01449214  | hypothetical protein                                      |
| TGME49_212100 | -7.44 | 4.92 | 0.004856505 | 0.014504076 | ThiF family protein                                       |
| TGME49_203480 | -2.97 | 5.11 | 0.004873471 | 0.014547616 | hypothetical protein                                      |
| TGME49_295460 | 1.07  | 6.00 | 0.004893183 | 0.014588789 | Got1 family protein                                       |
| TGME49_291350 | -2.95 | 5.02 | 0.004953377 | 0.014756355 | hypothetical protein                                      |
| TGME49_240090 | 1.51  | 8.58 | 0.004957372 | 0.014761299 | rhoGTPase family protein ROP34, putative                  |
| TGME49_257960 | -2.32 | 5.69 | 0.00495903  | 0.014761299 | GDP-D-mannose pyrophosphorylase                           |
| TGME49_315910 | 1.03  | 5.86 | 0.004987574 | 0.014840292 | hypothetical protein                                      |
| TGME49_221518 | -1.84 | 5.23 | 0.004993453 | 0.014851806 | hypothetical protein                                      |
| TGME49_242320 | -1.23 | 6.85 | 0.005192466 | 0.015374979 | B-box zinc finger domain-containing protein               |
| TGME49_295980 | -1.65 | 5.98 | 0.005194306 | 0.015374979 | hypothetical protein                                      |
| TGME49_215940 | -1.29 | 6.63 | 0.005211276 | 0.015419038 | Acetyl-coenzyme A transporter, putative                   |
| TGME49_249270 | -1.19 | 9.01 | 0.005218543 | 0.015434364 | protein disulfide isomerase-related protein (provisional) |
| TGME49_266280 | -1.08 | 6.59 | 0.005266194 | 0.015569067 | HEAT repeat-containing protein                            |
| TGME49_252065 | 1.65  | 5.06 | 0.005268968 | 0.015571042 | KRUF family protein                                       |
| TGME49_271010 | 1.80  | 5.05 | 0.005329856 | 0.015725839 | hypothetical protein                                      |
| TGME49_226400 | -1.41 | 6.16 | 0.005347966 | 0.015772979 | lipoic acid synthase LIPA                                 |
| TGME49_314890 | -2.90 | 5.41 | 0.005350293 | 0.01577355  | ThiF family protein                                       |
| TGME49_222120 | -2.90 | 5.09 | 0.005436011 | 0.016007116 | hypothetical protein                                      |
| TGME49_294750 | -2.90 | 4.76 | 0.005441281 | 0.016016253 | hypothetical protein                                      |
| TGME49_251510 | 1.45  | 6.13 | 0.005452083 | 0.016040002 | Ulp1 protease family, C-terminal catalytic domain         |
| TGME49_313690 | -1.22 | 6.61 | 0.005483667 | 0.016115355 | Sel1 repeat-containing protein                            |
| TGME49_267700 | -2.92 | 5.07 | 0.005502309 | 0.016163715 | hypothetical protein                                      |
| TGME49_248340 | -1.04 | 9.21 | 0.005516242 | 0.01619821  | GTP-binding nuclear protein ran/tc4                       |
| TGME49_227260 | -2.31 | 5.33 | 0.005605407 | 0.016440451 | RIO1 family protein                                       |
| TGME49_255300 | -1.33 | 6.62 | 0.005633216 | 0.016508917 | hypothetical protein                                      |
| TGME49_259080 | 1.89  | 6.29 | 0.005653595 | 0.016555519 | hypothetical protein                                      |
| TGME49_229030 | -1.17 | 6.70 | 0.005717908 | 0.016730594 | hypothetical protein                                      |
| TGME49_233120 | -1.37 | 6.11 | 0.005748021 | 0.016798761 | AP2 domain transcription factor AP2VIII-2                 |
| TGME49_298980 | -1.21 | 6.23 | 0.005799085 | 0.016941301 | RNA pseudouridine synthase superfamily protein            |
| TGME49_275770 | -1.32 | 6.31 | 0.005826632 | 0.017015053 | hypothetical protein                                      |
| TGME49_267400 | -1.04 | 9.30 | 0.005844023 | 0.017059103 | ribosomal protein RPL32                                   |
| TGME49_286130 | 1.59  | 4.91 | 0.005857133 | 0.017090625 | hypothetical protein                                      |
| TGME49_316480 | 1.69  | 5.01 | 0.00587959  | 0.017142623 | XRN 5'-3' exonuclease N-terminus protein                  |
| TGME49_208390 | 1.29  | 6.10 | 0.005894407 | 0.017176051 | hypothetical protein                                      |
| TGME49_259720 | 1.14  | 5.94 | 0.005895702 | 0.017176051 | hypothetical protein                                      |
| TGME49_225420 | -2.28 | 5.08 | 0.005936323 | 0.017280776 | histidine triad domain-containing protein                 |
| TGME49_281420 | -2.28 | 5.07 | 0.005950246 | 0.01731449  | histone deacetylase HDAC1                                 |
| TGME49_270530 | -2.02 | 5.98 | 0.005986492 | 0.017413109 | ubiquitin fusion degradation protein UFD1CY               |
| TGME49_246630 | -1.49 | 5.95 | 0.005989617 | 0.017415346 | DNA-directed RNA polymerase I RPA43                       |
| TGME49_253960 | 1.52  | 4.75 | 0.005996147 | 0.017427481 | oxidoreductase, short chain dehydrogenase/reductase       |
| TGME49_274150 | -2.90 | 5.45 | 0.00599854  | 0.017427584 | hypothetical protein                                      |
| TGME49_246010 | 2.82  | 5.31 | 0.006027986 | 0.017506255 | hypothetical protein                                      |
| TGME49_297170 | 1.44  | 5.17 | 0.006039088 | 0.017531613 | 50S ribosomal protein L17, putative                       |
| TGME49_290225 | -2.90 | 5.04 | 0.006096369 | 0.017684013 | hypothetical protein                                      |

|               |       |      |             |             |                                                     |
|---------------|-------|------|-------------|-------------|-----------------------------------------------------|
| TGME49_279390 | -1.25 | 9.03 | 0.006108944 | 0.017707707 | proliferation-associated protein 2G4, putative      |
| TGME49_231040 | -2.91 | 4.79 | 0.006111463 | 0.017707707 | 3' exoribonuclease family, domain 1 domain-conta    |
| TGME49_263470 | -1.17 | 6.31 | 0.006259682 | 0.018093858 | ubiquitin carboxyl-terminal hydrolase UCHL3         |
| TGME49_242625 | -1.29 | 6.49 | 0.006266223 | 0.018105687 | ATPase family associated with various cellular acti |
| TGME49_267040 | -2.28 | 5.35 | 0.006294781 | 0.018181099 | hypothetical protein                                |
| TGME49_254606 | 1.64  | 5.92 | 0.006314744 | 0.018231634 | hypothetical protein                                |
| TGME49_270975 | -1.68 | 5.71 | 0.006361291 | 0.018344535 | hypothetical protein                                |
| TGME49_284598 | -7.35 | 5.10 | 0.006360845 | 0.018344535 | haloacid dehalogenase family hydrolase domain-c     |
| TGME49_269705 | 1.40  | 5.10 | 0.006424869 | 0.01846371  | hypothetical protein                                |
| TGME49_299030 | 1.22  | 7.26 | 0.006426229 | 0.01846371  | RNA recognition motif 2 protein                     |
| TGME49_206415 | -1.19 | 6.70 | 0.006419892 | 0.01846371  | myosin K                                            |
| TGME49_237840 | -1.61 | 5.52 | 0.006424122 | 0.01846371  | hypothetical protein                                |
| TGME49_307260 | 1.81  | 5.67 | 0.006449425 | 0.018483351 | Toxoplasma gondii family C protein                  |
| TGME49_226040 | -1.13 | 6.54 | 0.006437648 | 0.018483351 | EF hand domain-containing protein                   |
| TGME49_286190 | -1.20 | 6.28 | 0.006447529 | 0.018483351 | hypothetical protein                                |
| TGME49_222870 | -1.34 | 6.27 | 0.006447988 | 0.018483351 | hypothetical protein                                |
| TGME49_277540 | -7.34 | 4.89 | 0.006442971 | 0.018483351 | hypothetical protein                                |
| TGME49_254510 | 1.59  | 4.84 | 0.006483861 | 0.018560461 | ankyrin repeat-containing protein                   |
| TGME49_245770 | 2.70  | 6.52 | 0.00655166  | 0.01873335  | hypothetical protein                                |
| TGME49_305820 | -1.48 | 5.90 | 0.006574794 | 0.018777145 | SGS domain-containing protein                       |
| TGME49_305620 | -1.52 | 5.96 | 0.006573046 | 0.018777145 | hypothetical protein                                |
| TGME49_278890 | -1.97 | 5.41 | 0.006588917 | 0.018802953 | hypothetical protein                                |
| TGME49_246050 | -7.42 | 4.73 | 0.006644524 | 0.018932412 | hypothetical protein                                |
| TGME49_260270 | -1.44 | 6.12 | 0.006667192 | 0.018982372 | HEAT repeat-containing protein                      |
| TGME49_213020 | 1.58  | 5.21 | 0.006721444 | 0.019114753 | hypothetical protein                                |
| TGME49_220530 | 1.68  | 5.63 | 0.00677703  | 0.019245085 | AP2 domain transcription factor AP2V-1              |
| TGME49_209190 | -1.16 | 6.40 | 0.006812193 | 0.019320811 | ABC transporter transmembrane region domain-c       |
| TGME49_277850 | -1.88 | 5.67 | 0.006830183 | 0.019356984 | trypsin domain-containing protein                   |
| TGME49_294350 | -1.06 | 7.97 | 0.006855302 | 0.019398431 | DEAD/DEAH box helicase domain-containing prote      |
| TGME49_202520 | 1.16  | 6.53 | 0.006859895 | 0.019404002 | hypothetical protein                                |
| TGME49_277710 | -1.12 | 6.64 | 0.006878235 | 0.019448439 | hypothetical protein                                |
| TGME49_206700 | -2.89 | 4.86 | 0.00692846  | 0.019575481 | hypothetical protein                                |
| TGME49_238070 | -2.84 | 5.04 | 0.006931724 | 0.019577223 | glutaredoxin domain-containing protein              |
| TGME49_242830 | -1.39 | 6.33 | 0.006961309 | 0.01964577  | XRN 5'-3' exonuclease N-terminus protein            |
| TGME49_217780 | 1.28  | 5.45 | 0.006980491 | 0.019692388 | Sec20 protein                                       |
| TGME49_306195 | 2.13  | 5.14 | 0.007016845 | 0.019787396 | hypothetical protein                                |
| TGME49_221410 | -1.07 | 6.65 | 0.007036028 | 0.019833928 | actin-like protein ALP4                             |
| TGME49_310330 | -1.95 | 5.47 | 0.007135299 | 0.020083136 | hypothetical protein                                |
| TGME49_244630 | 1.49  | 4.89 | 0.007151709 | 0.020121665 | hypothetical protein                                |
| TGME49_215450 | 2.17  | 6.55 | 0.007189314 | 0.020191292 | aquaporin 1                                         |
| TGME49_261430 | -1.58 | 5.96 | 0.00719011  | 0.020191292 | hypothetical protein                                |
| TGME49_232090 | -1.71 | 5.75 | 0.007223667 | 0.020277826 | 3-hydroxyacyl-CoA dehydrogenase, NAD binding d      |
| TGME49_204080 | -1.18 | 6.87 | 0.007239746 | 0.02031525  | histidine acid phosphatase superfamily protein      |
| TGME49_299060 | -1.06 | 6.76 | 0.007246921 | 0.020327667 | sodium/hydrogen exchanger NHE2                      |
| TGME49_312210 | -2.23 | 5.52 | 0.00725993  | 0.020355948 | hypothetical protein                                |
| TGME49_228070 | 1.21  | 5.71 | 0.007298921 | 0.020417148 | hypothetical protein                                |
| TGME49_229160 | -2.87 | 4.89 | 0.007300912 | 0.020417148 | DHHC zinc finger domain-containing protein          |
| TGME49_318690 | 1.15  | 5.00 | 0.007311581 | 0.020439255 | RNA recognition motif-containing protein            |
| TGME49_301010 | -1.14 | 6.37 | 0.007322727 | 0.020462677 | serine/threonine protein phosphatase, putative      |
| TGME49_263710 | -1.18 | 6.32 | 0.007402921 | 0.020658419 | acyl-CoA:cholesterol acyltransferase alpha ACAT1-   |
| TGME49_212735 | -2.27 | 5.29 | 0.00740395  | 0.020658419 | hypothetical protein                                |
| TGME49_221850 | 1.41  | 5.16 | 0.00744717  | 0.020771171 | prohibitin family protein, putative                 |
| TGME49_307860 | 1.05  | 8.14 | 0.007468781 | 0.020815742 | hypothetical protein                                |
| TGME49_227900 | 1.49  | 6.24 | 0.00752516  | 0.020957076 | AP2 domain transcription factor AP2X-1              |

|               |       |      |             |             |                                                   |
|---------------|-------|------|-------------|-------------|---------------------------------------------------|
| TGME49_285930 | -1.79 | 5.78 | 0.007534925 | 0.02097637  | hypothetical protein                              |
| TGME49_268730 | 1.15  | 5.50 | 0.007540834 | 0.020977022 | glutaredoxin-related protein                      |
| TGME49_229790 | -1.71 | 5.71 | 0.007539598 | 0.020977022 | hypothetical protein                              |
| TGME49_244010 | -1.91 | 5.45 | 0.007593517 | 0.021107695 | hypothetical protein                              |
| TGME49_272000 | -1.91 | 5.52 | 0.007634084 | 0.021204515 | hypothetical protein                              |
| TGME49_201770 | 1.67  | 6.50 | 0.007722169 | 0.021425035 | cullin 3, putative                                |
| TGME49_228780 | 1.20  | 5.46 | 0.007889613 | 0.021840434 | Toxoplasma gondii family C protein                |
| TGME49_309400 | -1.94 | 5.88 | 0.007894631 | 0.021846145 | RecF/RecN/SMC N terminal domain-containing pr     |
| TGME49_320210 | -1.21 | 7.39 | 0.007957575 | 0.02198741  | WD domain, G-beta repeat domain containing pro    |
| TGME49_292110 | 1.19  | 6.32 | 0.007995712 | 0.022076287 | formate/nitrite transporter protein               |
| TGME49_234900 | -1.02 | 7.62 | 0.008117015 | 0.022361105 | PHD-finger domain-containing protein              |
| TGME49_313660 | 1.36  | 4.89 | 0.008126172 | 0.022377994 | hypothetical protein                              |
| TGME49_299190 | 1.15  | 5.76 | 0.008196861 | 0.022547467 | B-box zinc finger domain-containing protein       |
| TGME49_258080 | -1.59 | 5.91 | 0.008195652 | 0.022547467 | hypothetical protein                              |
| TGME49_258100 | -2.85 | 4.89 | 0.008194033 | 0.022547467 | TPR repeat region protein                         |
| TGME49_315420 | 1.07  | 5.70 | 0.008251517 | 0.022655668 | hypothetical protein                              |
| TGME49_213690 | -1.55 | 5.66 | 0.008258984 | 0.022667754 | ring box protein 1 family protein                 |
| TGME49_204350 | -1.55 | 5.92 | 0.008279676 | 0.022716113 | hypothetical protein                              |
| TGME49_272290 | -1.21 | 6.44 | 0.008321669 | 0.022814394 | pyruvate dehydrogenase complex subunit PD-HE1     |
| TGME49_245475 | 1.21  | 5.26 | 0.008330712 | 0.022830721 | hypothetical protein                              |
| TGME49_268680 | -1.07 | 6.75 | 0.008336753 | 0.022838812 | hypothetical protein                              |
| TGME49_219530 | -2.84 | 5.05 | 0.008353668 | 0.022876674 | hypothetical protein                              |
| TGME49_240910 | -1.36 | 6.32 | 0.008371633 | 0.022917384 | hypothetical protein                              |
| TGME49_232380 | -1.49 | 5.75 | 0.008378666 | 0.022928148 | WD domain, G-beta repeat-containing protein       |
| TGME49_226390 | 2.45  | 5.45 | 0.00844277  | 0.023069418 | hypothetical protein                              |
| TGME49_225190 | 2.72  | 4.76 | 0.008501383 | 0.023195286 | hypothetical protein                              |
| TGME49_298010 | -1.23 | 7.06 | 0.008523356 | 0.023246659 | hypothetical protein                              |
| TGME49_230230 | 1.31  | 5.70 | 0.008527711 | 0.023249962 | hypothetical protein                              |
| TGME49_202030 | -1.05 | 6.98 | 0.008587412 | 0.023395478 | hypothetical protein                              |
| TGME49_259700 | -1.20 | 6.48 | 0.008607103 | 0.023423231 | hypothetical protein                              |
| TGME49_217000 | -1.43 | 5.87 | 0.008666248 | 0.023558177 | hypothetical protein                              |
| TGME49_243590 | -1.72 | 5.49 | 0.008789546 | 0.023867024 | endonuclease/exonuclease/phosphatase family p     |
| TGME49_223040 | 1.07  | 7.86 | 0.008833916 | 0.023969899 | hypothetical protein                              |
| TGME49_208040 | -1.68 | 5.83 | 0.008865366 | 0.024037594 | aldo-keto reductase                               |
| TGME49_297840 | -1.11 | 7.20 | 0.008875609 | 0.024056545 | DNA primase, large subunit                        |
| TGME49_255340 | -1.12 | 6.51 | 0.008888285 | 0.024082073 | tetratricopeptide repeat-containing protein       |
| TGME49_314550 | -2.19 | 4.92 | 0.008947437 | 0.024215721 | hypothetical protein                              |
| TGME49_263840 | -1.68 | 5.67 | 0.008956697 | 0.024224736 | hypothetical protein                              |
| TGME49_316180 | -1.68 | 5.67 | 0.008969618 | 0.024231405 | hypothetical protein                              |
| TGME49_313280 | 1.19  | 5.59 | 0.008980941 | 0.024253132 | WD domain, G-beta repeat-containing protein       |
| TGME49_242845 | -2.79 | 5.19 | 0.00907222  | 0.024472817 | hypothetical protein                              |
| TGME49_200440 | 1.38  | 5.08 | 0.009079813 | 0.024484367 | hypothetical protein                              |
| TGME49_249702 | -1.82 | 5.88 | 0.009100128 | 0.024530202 | MC family transporter, putative                   |
| TGME49_221450 | 1.22  | 5.49 | 0.009109888 | 0.024547563 | SPRY domain-containing protein                    |
| TGME49_251480 | 1.55  | 5.55 | 0.009195741 | 0.024736842 | DEAD/DEAH box helicase domain-containing prote    |
| TGME49_263360 | -1.68 | 5.69 | 0.009196859 | 0.024736842 | WD domain, G-beta repeat-containing protein       |
| TGME49_238870 | 1.12  | 5.83 | 0.009229991 | 0.024807908 | hypothetical protein                              |
| TGME49_214470 | -1.87 | 5.61 | 0.009336135 | 0.025020435 | Ulp1 protease family, C-terminal catalytic domain |
| TGME49_310770 | -1.24 | 6.43 | 0.009371398 | 0.025096746 | hypothetical protein                              |
| TGME49_264890 | -2.19 | 5.24 | 0.009466518 | 0.025305653 | hypothetical protein                              |
| TGME49_224890 | 1.01  | 7.05 | 0.009472836 | 0.025313389 | hypothetical protein                              |
| TGME49_255195 | 1.40  | 5.32 | 0.009641181 | 0.025716773 | hypothetical protein                              |
| TGME49_218200 | -2.18 | 5.33 | 0.009770481 | 0.026024114 | UDP-sugar pyrophosphorylase                       |
| TGME49_288990 | -2.23 | 5.24 | 0.009782534 | 0.026046833 | hypothetical protein                              |

|               |       |      |             |             |                                                   |
|---------------|-------|------|-------------|-------------|---------------------------------------------------|
| TGME49_205730 | -2.18 | 5.43 | 0.009804006 | 0.026085218 | hypothetical protein                              |
| TGME49_214500 | 1.19  | 6.17 | 0.009891797 | 0.026290421 | ankyrin repeat-containing protein                 |
| TGME49_243240 | 1.56  | 4.74 | 0.00994001  | 0.026380631 | WD domain, G-beta repeat-containing protein       |
| TGME49_259230 | -2.18 | 5.32 | 0.009939472 | 0.026380631 | site-specific recombinase, phage integrase family |
| TGME49_267480 | 1.00  | 5.89 | 0.009969824 | 0.026412353 | tRNA (guanine(26)-N(2))-dimethyltransferase, put  |
| TGME49_320610 | -2.21 | 5.08 | 0.00996891  | 0.026412353 | hypothetical protein                              |
| TGME49_235450 | 1.19  | 7.07 | 0.010035678 | 0.026577294 | ubiquitin-conjugating enzyme subfamily protein    |
| TGME49_255440 | 1.22  | 5.19 | 0.010113642 | 0.026755026 | hypothetical protein                              |
| TGME49_207950 | -1.54 | 5.76 | 0.010120883 | 0.026755026 | hypothetical protein                              |
| TGME49_219832 | -1.70 | 5.29 | 0.010117726 | 0.026755026 | cyclin-dependent kinase regulatory subunit protei |
| TGME49_295590 | 1.30  | 4.96 | 0.010160712 | 0.026841124 | hypothetical protein                              |
| TGME49_308930 | -1.40 | 5.90 | 0.010216844 | 0.026970133 | 50S ribosomal protein L33, putative               |
| TGME49_226620 | -1.66 | 5.71 | 0.010265571 | 0.02708909  | hypothetical protein                              |
| TGME49_202020 | 1.11  | 6.95 | 0.01029751  | 0.027153989 | DnAK-TPR                                          |
| TGME49_286510 | -1.72 | 5.50 | 0.010433282 | 0.027482609 | hypothetical protein                              |
| TGME49_319740 | -1.53 | 5.49 | 0.010466296 | 0.027559754 | transporter, major facilitator family protein     |
| TGME49_304720 | -1.57 | 5.94 | 0.010498759 | 0.027635395 | hypothetical protein                              |
| TGME49_209090 | -1.19 | 6.52 | 0.010539849 | 0.027733681 | proteasome maturation factor ump1 protein         |
| TGME49_203280 | -2.18 | 5.13 | 0.010567959 | 0.027797755 | hypothetical protein                              |
| TGME49_313570 | -1.16 | 6.48 | 0.010598647 | 0.027858656 | regulator of chromosome condensation (RCC1) re    |
| TGME49_301120 | -1.24 | 6.22 | 0.010641462 | 0.027951322 | acetyl-CoA acetyltransferase                      |
| TGME49_311160 | -1.15 | 6.69 | 0.010706357 | 0.02809184  | PWI domain-containing protein                     |
| TGME49_238040 | -1.13 | 6.79 | 0.010766104 | 0.028228572 | protein disulfide-isomerase domain-containing pr  |
| TGME49_262450 | -1.10 | 7.29 | 0.010823229 | 0.02835824  | hypothetical protein                              |
| TGME49_290630 | 1.03  | 5.90 | 0.010912421 | 0.028551466 | AP2 domain transcription factor AP2IX-7           |
| TGME49_221630 | -2.14 | 5.92 | 0.011007276 | 0.028779279 | hypothetical protein                              |
| TGME49_215360 | 1.25  | 5.74 | 0.01105408  | 0.028871024 | hypothetical protein                              |
| TGME49_273540 | -1.52 | 5.44 | 0.011100693 | 0.028981828 | phosphatidylserine synthase, putative             |
| TGME49_207720 | -1.30 | 6.17 | 0.011302938 | 0.029468943 | hypothetical protein                              |
| TGME49_207960 | -1.51 | 5.90 | 0.011300615 | 0.029468943 | hypothetical protein                              |
| TGME49_288370 | 1.17  | 5.46 | 0.011372396 | 0.029578707 | hypothetical protein                              |
| TGME49_219710 | 1.08  | 7.39 | 0.011382895 | 0.029579072 | hypothetical protein                              |
| TGME49_200375 | -2.17 | 5.05 | 0.011398527 | 0.029582559 | hypothetical protein                              |
| TGME49_292610 | -7.12 | 4.84 | 0.011407192 | 0.029594659 | Toxoplasma gondii family C protein                |
| TGME49_224980 | -1.09 | 6.48 | 0.011440005 | 0.029658976 | hypothetical protein                              |
| TGME49_249690 | -2.78 | 5.20 | 0.011476285 | 0.029742604 | hypothetical protein                              |
| TGME49_273970 | -2.72 | 5.02 | 0.011490563 | 0.029769175 | CorA family Mg <sup>2+</sup> transporter protein  |
| TGME49_265470 | 1.29  | 5.36 | 0.011555967 | 0.029907181 | hypothetical protein                              |
| TGME49_240730 | -2.72 | 5.10 | 0.011562294 | 0.029913087 | hypothetical protein                              |
| TGME49_293220 | 1.96  | 5.72 | 0.011570744 | 0.029924478 | DHHC zinc finger domain-containing protein        |
| TGME49_305260 | -2.72 | 4.78 | 0.011603792 | 0.029980809 | hypothetical protein                              |
| TGME49_202800 | -7.14 | 4.80 | 0.011634067 | 0.030046206 | cytochrome c oxidase assembly protein COX11, pu   |
| TGME49_266680 | -1.66 | 5.29 | 0.011736173 | 0.03027818  | hypothetical protein                              |
| TGME49_245530 | 2.61  | 5.75 | 0.011793449 | 0.03038354  | hypothetical protein                              |
| TGME49_278080 | 1.37  | 5.22 | 0.011810456 | 0.030416759 | Toxoplasma gondii family A protein                |
| TGME49_208430 | 1.29  | 5.23 | 0.011839749 | 0.030477926 | serine proteinase inhibitor PI-2, putative        |
| TGME49_307575 | -2.73 | 5.16 | 0.011900452 | 0.030616543 | hypothetical protein                              |
| TGME49_320670 | -1.11 | 6.65 | 0.011948971 | 0.030709312 | vacuolar protein sorting 16, putative             |
| TGME49_270350 | -1.10 | 6.42 | 0.01202879  | 0.030882248 | hypothetical protein                              |
| TGME49_255670 | -2.72 | 4.91 | 0.012035093 | 0.030887704 | methyltransferase domain-containing protein       |
| TGME49_266380 | -7.12 | 5.23 | 0.012050041 | 0.030915336 | hypothetical protein                              |
| TGME49_213000 | 2.03  | 5.32 | 0.012054657 | 0.030916453 | replication factor C, subunit 5, putative         |
| TGME49_240080 | 1.26  | 6.39 | 0.012073633 | 0.030951305 | hypothetical protein                              |
| TGME49_244100 | -1.12 | 6.45 | 0.012097686 | 0.030983821 | snoRNA binding domain-containing protein          |

|               |       |      |             |             |                                                    |
|---------------|-------|------|-------------|-------------|----------------------------------------------------|
| TGME49_272570 | 1.42  | 5.28 | 0.012144645 | 0.031091084 | dihydrouridine synthase (dus) protein              |
| TGME49_247590 | -1.83 | 5.36 | 0.012170949 | 0.031139098 | methyltransferase domain-containing protein        |
| TGME49_293050 | -2.14 | 5.54 | 0.012287068 | 0.031403589 | sybindin family protein                            |
| TGME49_214130 | -1.12 | 6.27 | 0.012397747 | 0.031653999 | hypothetical protein                               |
| TGME49_248750 | 2.15  | 4.92 | 0.012440017 | 0.031745781 | hypothetical protein                               |
| TGME49_316750 | -2.72 | 4.89 | 0.01246778  | 0.03178854  | DEAD/DEAH box helicase domain-containing prote     |
| TGME49_276100 | -1.66 | 5.52 | 0.012540736 | 0.031952515 | hypothetical protein                               |
| TGME49_227820 | -1.22 | 6.10 | 0.012573018 | 0.032023733 | hypothetical protein                               |
| TGME49_295430 | -1.65 | 4.79 | 0.012590034 | 0.032044996 | hypothetical protein                               |
| TGME49_232060 | -1.54 | 5.26 | 0.012606393 | 0.032064558 | hypothetical protein                               |
| TGME49_266860 | 1.15  | 7.22 | 0.012622581 | 0.032087915 | BTB/POZ domain-containing protein                  |
| TGME49_258625 | -7.11 | 4.74 | 0.012906674 | 0.032693371 | peptidyl-prolyl cis-trans isomerase, FKBP-type don |
| TGME49_276910 | -1.07 | 6.62 | 0.012932715 | 0.032748115 | endoplasmic reticulum lumen protein retaining re   |
| TGME49_223900 | 1.30  | 5.15 | 0.012952415 | 0.032786771 | hypothetical protein                               |
| TGME49_244040 | -1.40 | 5.69 | 0.012957955 | 0.032789569 | HEAT repeat-containing protein                     |
| TGME49_216220 | -1.06 | 6.84 | 0.013004524 | 0.032884901 | AP2 domain transcription factor AP2XI-5            |
| TGME49_248660 | -1.64 | 5.28 | 0.013156166 | 0.033234265 | hypothetical protein                               |
| TGME49_292960 | 1.35  | 7.78 | 0.013161095 | 0.033235362 | hypothetical protein                               |
| TGME49_211480 | -1.61 | 5.45 | 0.01331665  | 0.033570852 | GTP-binding protein engA, putative                 |
| TGME49_207065 | -1.61 | 5.59 | 0.013329532 | 0.033591873 | hypothetical protein                               |
| TGME49_321600 | -1.04 | 6.53 | 0.013452198 | 0.033843331 | hypothetical protein                               |
| TGME49_203362 | -2.71 | 4.97 | 0.013496237 | 0.033919502 | hypothetical protein                               |
| TGME49_293700 | -1.29 | 6.01 | 0.013606678 | 0.034172121 | WD domain, G-beta repeat-containing protein        |
| TGME49_218580 | -1.61 | 5.45 | 0.013703087 | 0.034357621 | RNA methyltransferase, TrmH family protein         |
| TGME49_202190 | 1.08  | 6.78 | 0.013839081 | 0.034675082 | hypothetical protein                               |
| TGME49_213388 | 1.10  | 5.45 | 0.013894508 | 0.0347858   | hypothetical protein                               |
| TGME49_263510 | -1.16 | 6.36 | 0.013897384 | 0.0347858   | Spc97 / Spc98 family protein                       |
| TGME49_314720 | 1.09  | 6.05 | 0.013952925 | 0.034886577 | Sedlin, N-terminal region protein, putative        |
| TGME49_219540 | -1.52 | 8.71 | 0.013982548 | 0.03491623  | cytosolic tRNA-Ala synthetase                      |
| TGME49_269700 | 1.37  | 8.27 | 0.014017164 | 0.03498004  | NLI interacting factor family phosphatase          |
| TGME49_322000 | -1.27 | 7.25 | 0.014062331 | 0.035056264 | myosin-light-chain kinase                          |
| TGME49_216055 | -1.16 | 6.25 | 0.014092995 | 0.035120864 | hypothetical protein                               |
| TGME49_257980 | 2.55  | 4.93 | 0.014111342 | 0.035154737 | ribosome recycling factor protein                  |
| TGME49_224090 | -1.61 | 5.72 | 0.014259996 | 0.035501147 | enoyl-CoA hydratase/isomerase family protein       |
| TGME49_305030 | -1.46 | 5.98 | 0.014363607 | 0.035703617 | kinase, pfkB family protein                        |
| TGME49_307605 | -1.00 | 6.90 | 0.014391774 | 0.035756982 | hypothetical protein                               |
| TGME49_315710 | 1.43  | 5.62 | 0.014454335 | 0.035888298 | hypothetical protein                               |
| TGME49_239310 | -2.12 | 5.36 | 0.014465016 | 0.035902763 | ribulose 5-phosphate isomerase                     |
| TGME49_215250 | -1.79 | 5.32 | 0.014531413 | 0.036055459 | thiamin pyrophosphokinase, catalytic domain-con    |
| TGME49_237160 | -1.32 | 6.04 | 0.014589863 | 0.036177748 | hypothetical protein                               |
| TGME49_218810 | -1.29 | 5.77 | 0.014608908 | 0.036211287 | histidyl-tRNA synthetase                           |
| TGME49_216960 | 1.10  | 5.62 | 0.014730382 | 0.036463491 | elongation factor Tu GTP binding domain-containi   |
| TGME49_238080 | 1.27  | 5.19 | 0.014877493 | 0.036753819 | hypothetical protein                               |
| TGME49_293600 | 1.05  | 5.75 | 0.015014351 | 0.037067148 | ribosomal protein RPL27                            |
| TGME49_289615 | 1.86  | 5.40 | 0.015061041 | 0.037157605 | hypothetical protein                               |
| TGME49_267650 | -1.48 | 5.66 | 0.015139284 | 0.037304051 | hypothetical protein                               |
| TGME49_297270 | -2.08 | 5.28 | 0.015153785 | 0.037324146 | hypothetical protein                               |
| TGME49_239087 | -1.78 | 4.96 | 0.01524815  | 0.037514094 | hypothetical protein                               |
| TGME49_246730 | 1.03  | 6.92 | 0.015300021 | 0.03760916  | hypothetical protein                               |
| TGME49_243600 | -1.04 | 6.49 | 0.015379806 | 0.037780161 | acetyltransferase, GNAT family protein             |
| TGME49_293680 | -1.28 | 6.24 | 0.015399909 | 0.037780327 | hypothetical protein                               |
| TGME49_264210 | 1.02  | 5.57 | 0.015530199 | 0.038035869 | hypothetical protein                               |
| TGME49_249300 | -1.63 | 7.71 | 0.015596485 | 0.038148236 | hypothetical protein                               |
| TGME49_249310 | -2.65 | 5.20 | 0.015592686 | 0.038148236 | hypothetical protein                               |

|               |       |      |             |             |                                                    |
|---------------|-------|------|-------------|-------------|----------------------------------------------------|
| TGME49_210478 | 2.28  | 4.78 | 0.01561074  | 0.038157294 | hypothetical protein                               |
| TGME49_267855 | -1.02 | 6.58 | 0.015673399 | 0.038285138 | hypothetical protein                               |
| TGME49_255430 | -1.48 | 5.29 | 0.015731868 | 0.038415268 | Rad9 protein                                       |
| TGME49_234280 | -1.08 | 6.09 | 0.015846164 | 0.038668823 | AMP deaminase                                      |
| TGME49_238140 | -1.15 | 6.57 | 0.01587879  | 0.038724094 | hypothetical protein                               |
| TGME49_203750 | -1.78 | 5.36 | 0.015946314 | 0.038861912 | hypothetical protein                               |
| TGME49_246182 | -1.29 | 5.76 | 0.01600518  | 0.038992522 | hypothetical protein                               |
| TGME49_254480 | 1.43  | 5.93 | 0.016087915 | 0.039141494 | WD domain, G-beta repeat-containing protein        |
| TGME49_262990 | -2.67 | 4.94 | 0.016103385 | 0.039141494 | hypothetical protein                               |
| TGME49_269417 | -2.65 | 4.68 | 0.016199548 | 0.039323526 | hypothetical protein                               |
| TGME49_258010 | -1.62 | 5.57 | 0.016229707 | 0.039383806 | calcium signaling protein kinase RAD53, putative   |
| TGME49_211330 | -2.18 | 4.75 | 0.01635566  | 0.03957707  | methionine aminopeptidase                          |
| TGME49_219510 | 1.51  | 6.27 | 0.016970665 | 0.040876721 | GTP binding protein 7 isoform 2 family protein, pu |
| TGME49_288560 | -1.21 | 6.49 | 0.017105288 | 0.041143949 | hypothetical protein                               |
| TGME49_248800 | 2.35  | 5.16 | 0.017118414 | 0.04116213  | hypothetical protein                               |
| TGME49_289950 | -1.08 | 6.53 | 0.017359306 | 0.041619556 | hypothetical protein                               |
| TGME49_316150 | -1.32 | 5.95 | 0.017390711 | 0.041681335 | ULK kinase                                         |
| TGME49_218192 | -6.99 | 5.36 | 0.017435721 | 0.041775671 | hypothetical protein                               |
| TGME49_232520 | -1.24 | 5.75 | 0.017498202 | 0.041898222 | brix domain-containing protein                     |
| TGME49_237100 | 1.27  | 5.16 | 0.017611009 | 0.042113826 | RAP domain-containing protein                      |
| TGME49_235660 | -1.32 | 5.76 | 0.017611029 | 0.042113826 | hypothetical protein                               |
| TGME49_311040 | -1.12 | 5.92 | 0.017777343 | 0.042429204 | hypothetical protein                               |
| TGME49_283900 | -1.45 | 5.67 | 0.017816825 | 0.042509714 | ATPase, AAA family protein                         |
| TGME49_226520 | -1.12 | 5.80 | 0.01787066  | 0.04261066  | hypothetical protein                               |
| TGME49_297980 | 1.38  | 4.86 | 0.017879897 | 0.042618943 | hypothetical protein                               |
| TGME49_287480 | 1.04  | 8.12 | 0.017985954 | 0.042844119 | hypothetical protein                               |
| TGME49_204150 | 1.32  | 4.92 | 0.018014206 | 0.042897598 | hypothetical protein                               |
| TGME49_264752 | -2.63 | 5.23 | 0.0180583   | 0.042988753 | HEAT repeat-containing protein                     |
| TGME49_203950 | -1.04 | 6.39 | 0.018072145 | 0.043007866 | Myb family DNA-binding domain-containing prote     |
| TGME49_220150 | -1.74 | 5.32 | 0.01808925  | 0.043026464 | 50S ribosomal protein L16, putative                |
| TGME49_258050 | -2.03 | 5.14 | 0.018091954 | 0.043026464 | actin like protein ALP2a                           |
| TGME49_273885 | -2.04 | 5.11 | 0.018097417 | 0.043026464 | hypothetical protein                               |
| TGME49_246000 | 1.33  | 4.76 | 0.018195902 | 0.043232808 | large subunit ribosomal protein IMG2               |
| TGME49_210310 | -1.74 | 5.16 | 0.018338528 | 0.043519936 | hypothetical protein                               |
| TGME49_312820 | -1.43 | 5.76 | 0.018390518 | 0.043623458 | hypothetical protein                               |
| TGME49_240480 | -2.70 | 4.71 | 0.018401618 | 0.043623458 | cpw-wpc domain-containing protein                  |
| TGME49_295090 | 1.07  | 7.42 | 0.01845644  | 0.043711377 | hypothetical protein                               |
| TGME49_255310 | -1.27 | 5.94 | 0.018472932 | 0.043736426 | zinc finger (CCCH type) motif-containing protein   |
| TGME49_257070 | -2.03 | 5.02 | 0.018498038 | 0.043767838 | hypothetical protein                               |
| TGME49_293490 | 1.72  | 4.86 | 0.018583042 | 0.043954897 | hypothetical protein                               |
| TGME49_251590 | 1.17  | 5.99 | 0.018723141 | 0.044257961 | hypothetical protein                               |
| TGME49_273380 | 1.42  | 6.00 | 0.018745094 | 0.044295693 | ion channel protein                                |
| TGME49_309960 | -1.03 | 7.38 | 0.018824934 | 0.044455945 | hypothetical protein                               |
| TGME49_262933 | -1.61 | 5.41 | 0.018899804 | 0.04460426  | hypothetical protein                               |
| TGME49_209530 | 1.26  | 4.95 | 0.018955962 | 0.04470792  | hypothetical protein                               |
| TGME49_262420 | 1.18  | 6.13 | 0.018953105 | 0.04470792  | AP2 domain transcription factor APVIIb-1/ADA2-B    |
| TGME49_271370 | -1.82 | 4.88 | 0.019136351 | 0.045047494 | hypothetical protein                               |
| TGME49_268640 | 2.40  | 5.29 | 0.019226693 | 0.045202597 | BING4CT (NUC141) domain-containing protein         |
| TGME49_212290 | -1.10 | 9.79 | 0.019277152 | 0.045306821 | ribosomal protein RPS19                            |
| TGME49_260640 | -1.54 | 5.79 | 0.019294055 | 0.045332139 | autophagy protein apg9 protein                     |
| TGME49_306890 | -1.30 | 5.84 | 0.019335575 | 0.04541526  | hypothetical protein                               |
| TGME49_233770 | 2.55  | 6.27 | 0.019374595 | 0.04549246  | calcium-translocating P-type ATPase, PMCA-type p   |
| TGME49_310500 | -1.12 | 6.13 | 0.019494577 | 0.045759651 | hypothetical protein                               |
| TGME49_313090 | -1.74 | 5.25 | 0.019519824 | 0.045804374 | hypothetical protein                               |

|               |       |      |             |             |                                                    |
|---------------|-------|------|-------------|-------------|----------------------------------------------------|
| TGME49_278020 | -2.58 | 4.94 | 0.019695415 | 0.046157813 | hypothetical protein                               |
| TGME49_254420 | 2.12  | 5.55 | 0.019797946 | 0.046368708 | phospholipase, patatin family protein              |
| TGME49_292035 | 1.30  | 4.87 | 0.019917707 | 0.046590169 | hypothetical protein                               |
| TGME49_219130 | -1.39 | 5.89 | 0.020144442 | 0.047060982 | NADPH-glutathione reductase                        |
| TGME49_261960 | 1.21  | 5.17 | 0.020191326 | 0.047140721 | hypothetical protein                               |
| TGME49_262880 | -1.15 | 6.33 | 0.020334332 | 0.047459611 | hypothetical protein                               |
| TGME49_288245 | -1.00 | 6.04 | 0.020440839 | 0.047693141 | hypothetical protein                               |
| TGME49_219100 | -1.39 | 5.69 | 0.020464923 | 0.047734272 | cyclin-dependent kinase regulatory subunit protein |
| TGME49_240700 | -1.29 | 5.96 | 0.020515819 | 0.047837895 | ubiquitin family protein                           |
| TGME49_316770 | -1.39 | 5.68 | 0.020707553 | 0.048221442 | undecaprenyl diphosphate synthase                  |
| TGME49_226350 | 1.16  | 5.21 | 0.020820091 | 0.048454122 | hypothetical protein                               |
| TGME49_289790 | -2.58 | 4.93 | 0.02083252  | 0.048454122 | hypothetical protein                               |
| TGME49_213752 | -1.54 | 5.38 | 0.02094416  | 0.048622016 | herpesviridae ul52/ul70 dna primase                |
| TGME49_220460 | -6.86 | 4.98 | 0.020978103 | 0.048670251 | SNF7 family protein                                |
| TGME49_247280 | -1.70 | 5.61 | 0.021027356 | 0.048738642 | hypothetical protein                               |
| TGME49_278030 | 1.09  | 7.76 | 0.021067718 | 0.048786316 | hypothetical protein                               |
| TGME49_211020 | -1.39 | 5.85 | 0.021092568 | 0.048813286 | RNA recognition motif-containing protein           |
| TGME49_255270 | 1.98  | 4.98 | 0.021137791 | 0.048902636 | hypothetical protein                               |
| TGME49_226080 | 1.13  | 5.42 | 0.021152026 | 0.048904968 | polyA polymerase                                   |
| TGME49_313630 | 2.69  | 7.24 | 0.021318974 | 0.049221514 | hypothetical protein                               |
| TGME49_229200 | -1.40 | 5.54 | 0.02133536  | 0.049236471 | hypothetical protein                               |
| TGME49_242880 | -1.70 | 5.25 | 0.021374461 | 0.049311316 | flavoprotein                                       |
| TGME49_286610 | 1.41  | 4.91 | 0.021463872 | 0.049481188 | ribosomal protein RPS14, putative                  |
| TGME49_285660 | -1.55 | 5.85 | 0.021555536 | 0.049620683 | DEAD/DEAH box helicase domain-containing protein   |
| TGME49_263560 | 1.13  | 7.28 | 0.021583075 | 0.049660367 | hypothetical protein                               |
| TGME49_257060 | -1.70 | 5.49 | 0.021586208 | 0.049660367 | translation initiation factor sui1 protein         |

**Supplementary Table S7B: Differential expression analysis of *T. gondii* genes from neuronal stem cells infected with *T. gondii* EGS strain for 18 hours compared to *T. gondii* gene expression from neuronal stem cells infected with ME49 strain for 18 hours.**

| gene ID       | logFC (EGS/ME49) | logCPM | PValue    | FDR       | Product Name                                       |
|---------------|------------------|--------|-----------|-----------|----------------------------------------------------|
| TGME49_233925 | 7.05             | 7.83   | 2.01E-150 | 1.49E-146 | hypothetical protein                               |
| TGME49_322200 | 10.27            | 6.70   | 4.84E-126 | 1.79E-122 | apocytochrome b, putative                          |
| TGME49_237130 | 8.63             | 10.26  | 1.14E-111 | 2.80E-108 | cytochrome b, putative                             |
| TGME49_330000 | 9.84             | 10.23  | 1.22E-93  | 2.25E-90  | cytochrome b                                       |
| TGME49_323400 | 10.51            | 9.06   | 1.61E-90  | 2.38E-87  | cytochrome c oxidase subunit iii subfamily protein |
| TGME49_322800 | 12.26            | 6.48   | 3.45E-88  | 4.25E-85  | hypothetical protein                               |
| TGME49_290600 | 3.32             | 9.11   | 5.24E-86  | 5.54E-83  | succinyl-CoA-synthetase alpha SCSA                 |
| TGME49_320050 | 4.45             | 13.43  | 8.97E-86  | 8.29E-83  | ribosomal protein RPL5                             |
| TGME49_302055 | 11.93            | 5.97   | 4.97E-64  | 4.08E-61  | ribosomal protein RPS12                            |
| TGME49_238240 | 2.80             | 8.97   | 3.64E-61  | 2.69E-58  | bystin protein                                     |
| TGME49_261240 | 8.23             | 5.02   | 3.40E-57  | 2.29E-54  | histone H3                                         |
| TGME49_255060 | 8.34             | 9.95   | 1.10E-55  | 6.77E-53  | cytochrome b(N-terminal)/b6/petB subfamily protein |
| TGME49_321360 | 3.10             | 8.21   | 2.77E-54  | 1.57E-51  | clustered-asparagine-rich protein                  |
| TGME49_301250 | 8.17             | 14.41  | 2.18E-52  | 1.15E-49  | hypothetical protein                               |
| TGME49_232955 | 11.71            | 12.33  | 4.40E-46  | 2.17E-43  | hypothetical protein                               |
| TGME49_251180 | 3.68             | 6.80   | 2.34E-45  | 1.08E-42  | KRUF family protein                                |
| TGME49_277230 | 4.50             | 5.63   | 4.12E-43  | 1.79E-40  | hypothetical protein                               |
| TGME49_280400 | -12.29           | 7.58   | 1.47E-42  | 6.05E-40  | hypothetical protein                               |
| TGME49_217530 | 4.39             | 6.35   | 1.13E-40  | 4.38E-38  | hypothetical protein                               |
| TGME49_293790 | 6.17             | 6.72   | 3.29E-40  | 1.22E-37  | hypothetical protein                               |
| TGME49_262690 | 1.87             | 10.98  | 5.15E-35  | 1.81E-32  | ribosomal protein RPL27                            |
| TGME49_218520 | 1.97             | 10.33  | 5.12E-34  | 1.72E-31  | microneme protein MIC6                             |
| TGME49_244370 | 3.61             | 8.80   | 1.82E-32  | 5.85E-30  | TDC1, putative                                     |
| TGME49_213280 | 2.05             | 8.91   | 4.06E-31  | 1.25E-28  | SAG-related sequence SRS25                         |
| TGME49_211695 | 3.87             | 5.62   | 8.07E-31  | 2.39E-28  | hypothetical protein                               |
| TGME49_221840 | 4.42             | 4.71   | 1.26E-29  | 3.59E-27  | hypothetical protein                               |
| TGME49_277260 | 2.05             | 9.53   | 1.78E-29  | 4.88E-27  | hypothetical protein                               |
| TGME49_253690 | 1.87             | 8.98   | 1.02E-28  | 2.70E-26  | hypothetical protein                               |
| TGME49_273320 | 2.45             | 7.86   | 5.79E-28  | 1.48E-25  | hypothetical protein                               |
| TGME49_271935 | 2.66             | 6.69   | 1.45E-26  | 3.57E-24  | hypothetical protein                               |
| TGME49_315885 | 2.57             | 7.08   | 1.22E-25  | 2.92E-23  | glycosyltransferase, putative                      |
| TGME49_202970 | -12.46           | 7.43   | 1.42E-25  | 3.28E-23  | hypothetical protein                               |
| TGME49_211030 | -3.84            | 8.15   | 2.17E-25  | 4.86E-23  | hypothetical protein                               |
| TGME49_223660 | 2.72             | 7.34   | 9.71E-25  | 2.11E-22  | 50S ribosomal protein L4, putative                 |
| TGME49_208020 | 3.67             | 6.12   | 4.87E-24  | 1.03E-21  | AP2 domain transcription factor AP2Ib-1            |
| TGME49_213010 | -6.45            | 7.34   | 5.99E-24  | 1.23E-21  | hypothetical protein                               |
| TGME49_250710 | 1.75             | 11.27  | 2.16E-23  | 4.31E-21  | microneme protein MIC10                            |
| TGME49_208370 | 1.75             | 8.84   | 3.17E-23  | 6.16E-21  | myosin heavy chain, putative                       |
| TGME49_251400 | 2.83             | 6.13   | 4.84E-23  | 9.18E-21  | hypothetical protein                               |
| TGME49_293170 | -5.85            | 7.60   | 5.00E-23  | 9.24E-21  | hypothetical protein                               |
| TGME49_290020 | 2.52             | 6.64   | 9.34E-23  | 1.68E-20  | cyclin dependent kinase binding protein            |
| TGME49_237230 | 1.74             | 9.81   | 9.91E-23  | 1.75E-20  | hypothetical protein                               |
| TGME49_207460 | 2.16             | 7.42   | 1.08E-22  | 1.86E-20  | Rab5B protein                                      |
| TGME49_254710 | 2.02             | 7.81   | 1.28E-22  | 2.14E-20  | serine esterase (DUF676) protein                   |
| TGME49_266050 | 2.21             | 7.09   | 1.40E-22  | 2.30E-20  | hypothetical protein                               |
| TGME49_311230 | 1.55             | 9.99   | 5.69E-22  | 9.14E-20  | hypothetical protein                               |



|               |        |       |          |          |                                                      |
|---------------|--------|-------|----------|----------|------------------------------------------------------|
| TGME49_228160 | 2.03   | 7.19  | 6.82E-22 | 1.07E-19 | acid phosphatase                                     |
| TGME49_280490 | -3.83  | 7.89  | 1.12E-21 | 1.72E-19 | U-box domain-containing protein                      |
| TGME49_252220 | -2.92  | 7.73  | 3.09E-21 | 4.47E-19 | tetratricopeptide repeat domain containing protein   |
| TGME49_312140 | -3.53  | 8.29  | 3.23E-21 | 4.59E-19 | hypothetical protein                                 |
| TGME49_214980 | 1.82   | 8.41  | 3.39E-21 | 4.73E-19 | hypothetical protein                                 |
| TGME49_213570 | 1.61   | 8.76  | 5.04E-21 | 6.90E-19 | hypothetical protein                                 |
| TGME49_290270 | 2.38   | 6.58  | 9.30E-21 | 1.25E-18 | SPRY domain-containing protein                       |
| TGME49_251540 | 2.03   | 9.03  | 9.59E-21 | 1.27E-18 | dense granule protein GRA9                           |
| TGME49_214220 | 1.87   | 9.74  | 1.07E-20 | 1.36E-18 | hypothetical protein                                 |
| TGME49_261720 | -5.72  | 7.82  | 1.06E-20 | 1.36E-18 | metal cation transporter, ZIP family protein         |
| TGME49_305160 | 3.64   | 4.99  | 2.64E-20 | 3.31E-18 | histone H2Ba                                         |
| TGME49_314500 | -3.17  | 8.36  | 4.40E-20 | 5.42E-18 | subtilisin SUB2                                      |
| TGME49_243615 | 3.28   | 5.68  | 5.89E-20 | 7.13E-18 | hypothetical protein                                 |
| TGME49_254120 | 2.28   | 8.30  | 6.71E-20 | 8.01E-18 | autophagy-related protein 8 atg8, putative           |
| TGME49_229010 | -2.17  | 9.17  | 9.07E-20 | 1.06E-17 | rhoptry neck protein RON4                            |
| TGME49_208740 | 1.73   | 9.88  | 1.02E-19 | 1.18E-17 | microneme protein, putative                          |
| TGME49_205680 | 2.99   | 8.42  | 4.43E-19 | 5.04E-17 | hypothetical protein                                 |
| TGME49_301222 | 3.03   | 6.56  | 4.62E-19 | 5.18E-17 | DNA repair protein Rad4 domain-containing protein    |
| TGME49_235130 | -4.32  | 7.38  | 7.20E-19 | 7.94E-17 | transmembrane protein                                |
| TGME49_251740 | -3.84  | 7.43  | 9.53E-19 | 1.04E-16 | AP2 domain transcription factor AP2XII-9             |
| TGME49_260430 | 3.90   | 4.67  | 1.09E-18 | 1.17E-16 | hypothetical protein                                 |
| TGME49_200300 | 6.44   | 4.83  | 1.90E-18 | 2.00E-16 | hypothetical protein                                 |
| TGME49_275860 | 2.43   | 9.46  | 2.52E-18 | 2.63E-16 | hypothetical protein                                 |
| TGME49_319500 | -10.71 | 7.06  | 2.59E-18 | 2.66E-16 | hypothetical protein                                 |
| TGME49_287460 | 3.42   | 4.88  | 2.89E-18 | 2.92E-16 | hypothetical protein                                 |
| TGME49_201170 | -2.61  | 8.67  | 3.06E-18 | 3.06E-16 | hypothetical protein                                 |
| TGME49_226310 | -4.25  | 7.74  | 4.51E-18 | 4.44E-16 | zinc finger (CCCH type) motif-containing protein     |
| TGME49_254080 | 1.64   | 7.96  | 1.97E-17 | 1.92E-15 | metal cation transporter, ZIP family protein         |
| TGME49_257910 | 4.29   | 5.98  | 2.83E-17 | 2.72E-15 | hypothetical protein                                 |
| TGME49_232650 | 2.25   | 6.75  | 3.41E-17 | 3.19E-15 | hypothetical protein                                 |
| TGME49_275640 | 2.00   | 6.94  | 3.82E-17 | 3.48E-15 | hypothetical protein                                 |
| TGME49_239790 | -10.48 | 7.09  | 3.78E-17 | 3.48E-15 | BRCA1 C Terminus (BRCT) domain-containing protein    |
| TGME49_287170 | -10.57 | 7.07  | 5.50E-17 | 4.96E-15 | hypothetical protein                                 |
| TGME49_240060 | 1.66   | 9.24  | 5.60E-17 | 4.99E-15 | hypothetical protein                                 |
| TGME49_224760 | 3.36   | 4.85  | 5.87E-17 | 5.16E-15 | SAG-related sequence SRS40E                          |
| TGME49_249540 | 1.86   | 7.36  | 6.15E-17 | 5.35E-15 | hypothetical protein                                 |
| TGME49_253430 | 1.25   | 10.15 | 7.59E-17 | 6.53E-15 | asparagine synthetase, putative                      |
| TGME49_249990 | 2.33   | 10.24 | 8.58E-17 | 7.29E-15 | hypothetical protein                                 |
| TGME49_269310 | 3.54   | 4.71  | 1.17E-16 | 9.72E-15 | hypothetical protein                                 |
| TGME49_287040 | 2.26   | 7.04  | 1.16E-16 | 9.72E-15 | hypothetical protein                                 |
| TGME49_269330 | -10.42 | 7.07  | 1.28E-16 | 1.05E-14 | hypothetical protein                                 |
| TGME49_293570 | -3.03  | 7.85  | 1.46E-16 | 1.18E-14 | translocation protein sec62, putative                |
| TGME49_318660 | 1.66   | 8.55  | 1.91E-16 | 1.53E-14 | PP2C, putative                                       |
| TGME49_216680 | -4.00  | 7.27  | 2.01E-16 | 1.60E-14 | ankyrin repeat-containing protein                    |
| TGME49_253570 | 2.76   | 6.14  | 2.48E-16 | 1.95E-14 | hypothetical protein                                 |
| TGME49_228690 | -5.43  | 7.16  | 2.78E-16 | 2.16E-14 | phosphatidylinositol 3- and 4-kinase                 |
| TGME49_290700 | 2.22   | 7.93  | 2.82E-16 | 2.17E-14 | hypothetical protein                                 |
| TGME49_223930 | 1.62   | 8.26  | 3.30E-16 | 2.49E-14 | RNA recognition motif-containing protein             |
| TGME49_259260 | -2.40  | 9.01  | 3.64E-16 | 2.72E-14 | membrane protein FtsH1                               |
| TGME49_261022 | -2.86  | 7.63  | 3.83E-16 | 2.83E-14 | dynein heavy chain family protein                    |
| TGME49_301890 | -3.97  | 6.15  | 3.91E-16 | 2.86E-14 | Toxoplasma gondii family B protein                   |
| TGME49_265190 | -4.49  | 7.20  | 3.99E-16 | 2.89E-14 | Ulp1 protease family, C-terminal catalytic domain-co |
| TGME49_306670 | -3.50  | 7.92  | 4.67E-16 | 3.35E-14 | hypothetical protein                                 |
| TGME49_270595 | -3.32  | 6.90  | 5.10E-16 | 3.63E-14 | UBA/TS-N domain-containing protein                   |
| TGME49_236910 | -4.53  | 7.47  | 5.55E-16 | 3.91E-14 | U2 snRNP auxiliary factor, putative                  |

|               |        |       |          |          |                                                       |
|---------------|--------|-------|----------|----------|-------------------------------------------------------|
| TGME49_293410 | 2.96   | 5.32  | 5.89E-16 | 4.11E-14 | hypothetical protein                                  |
| TGME49_212880 | -2.89  | 7.91  | 6.47E-16 | 4.47E-14 | surface antigen repeat-containing protein             |
| TGME49_222380 | -2.55  | 8.13  | 6.97E-16 | 4.77E-14 | importin-beta N-terminal domain-containing protein    |
| TGME49_202420 | 2.25   | 6.26  | 9.21E-16 | 6.25E-14 | hypothetical protein                                  |
| TGME49_239410 | -2.63  | 7.90  | 1.09E-15 | 7.35E-14 | hypothetical protein                                  |
| TGME49_236040 | 1.22   | 9.85  | 1.21E-15 | 8.07E-14 | fructose-1,6-bisphosphate aldolase                    |
| TGME49_211150 | -5.27  | 6.82  | 1.25E-15 | 8.28E-14 | hypothetical protein                                  |
| TGME49_240650 | -2.36  | 8.44  | 1.45E-15 | 9.48E-14 | coatamer protein complex, subunit alpha, putative     |
| TGME49_234510 | 1.90   | 6.89  | 2.27E-15 | 1.48E-13 | ankyrin repeat-containing protein                     |
| TGME49_224880 | -4.06  | 7.04  | 2.41E-15 | 1.55E-13 | kinesin motor domain-containing protein               |
| TGME49_220250 | 1.86   | 6.94  | 2.74E-15 | 1.75E-13 | Nucleotide-sensitive chloride conductance regulator   |
| TGME49_246330 | -5.33  | 7.00  | 3.23E-15 | 2.04E-13 | CRAL/TRIO domain-containing protein                   |
| TGME49_248260 | 2.78   | 6.49  | 3.28E-15 | 2.06E-13 | hypothetical protein                                  |
| TGME49_222400 | 1.64   | 7.58  | 3.34E-15 | 2.08E-13 | hypothetical protein                                  |
| TGME49_261520 | -5.22  | 7.04  | 3.38E-15 | 2.08E-13 | nucleolar GTP-binding protein 1, putative             |
| TGME49_234460 | 2.22   | 6.73  | 3.49E-15 | 2.12E-13 | hypothetical protein                                  |
| TGME49_267020 | -4.00  | 6.64  | 3.50E-15 | 2.12E-13 | hypothetical protein                                  |
| TGME49_270700 | 1.73   | 7.08  | 3.61E-15 | 2.17E-13 | hypothetical protein                                  |
| TGME49_301170 | -10.53 | 5.92  | 4.23E-15 | 2.52E-13 | SAG-related sequence SRS19D                           |
| TGME49_210300 | -5.29  | 6.98  | 4.63E-15 | 2.74E-13 | hypothetical protein                                  |
| TGME49_239440 | -10.30 | 6.88  | 4.77E-15 | 2.80E-13 | protein kinase (incomplete catalytic triad)           |
| TGME49_212940 | -10.38 | 5.88  | 4.93E-15 | 2.87E-13 | hypothetical protein                                  |
| TGME49_209050 | -10.26 | 6.78  | 6.12E-15 | 3.53E-13 | Tyrosine kinase-like (TKL) protein                    |
| TGME49_252430 | 1.68   | 8.12  | 1.01E-14 | 5.80E-13 | hypothetical protein                                  |
| TGME49_321650 | -2.84  | 7.47  | 1.02E-14 | 5.80E-13 | hypothetical protein                                  |
| TGME49_235680 | -2.96  | 7.23  | 1.10E-14 | 6.22E-13 | peptidase M16 inactive domain-containing protein      |
| TGME49_278800 | -2.53  | 7.62  | 1.24E-14 | 6.94E-13 | zinc finger protein 36 family 3 protein               |
| TGME49_204050 | 3.19   | 10.48 | 1.42E-14 | 7.86E-13 | subtilisin SUB1                                       |
| TGME49_254520 | 1.63   | 7.43  | 1.54E-14 | 8.41E-13 | mediator complex subunit MED11                        |
| TGME49_233450 | 1.48   | 8.00  | 1.67E-14 | 9.08E-13 | SAG-related sequence SRS29A                           |
| TGME49_254730 | 2.31   | 6.04  | 1.80E-14 | 9.69E-13 | POPLD (NUC188) domain-containing protein              |
| TGME49_313230 | 2.54   | 9.82  | 2.17E-14 | 1.16E-12 | eukaryotic initiation factor-2, alpha subunit         |
| TGME49_283540 | 2.10   | 8.26  | 2.40E-14 | 1.27E-12 | hypothetical protein                                  |
| TGME49_202310 | 2.33   | 6.20  | 2.73E-14 | 1.43E-12 | O-sialoglycoprotein endopeptidase                     |
| TGME49_278510 | -2.72  | 7.68  | 2.89E-14 | 1.50E-12 | protein phosphatase 2C domain-containing protein      |
| TGME49_277000 | -4.39  | 7.32  | 3.12E-14 | 1.61E-12 | transport protein Sec24, putative                     |
| TGME49_214410 | 2.96   | 7.77  | 3.25E-14 | 1.67E-12 | hypothetical protein                                  |
| TGME49_282070 | -2.02  | 8.54  | 3.69E-14 | 1.88E-12 | hypothetical protein                                  |
| TGME49_221470 | -2.20  | 8.22  | 3.74E-14 | 1.90E-12 | hypothetical protein                                  |
| TGME49_250820 | -2.93  | 7.50  | 3.85E-14 | 1.93E-12 | hypothetical protein                                  |
| TGME49_270360 | -5.18  | 7.03  | 3.86E-14 | 1.93E-12 | hypothetical protein                                  |
| TGME49_305590 | -4.24  | 6.99  | 6.34E-14 | 3.14E-12 | ABC transporter transmembrane region domain-cont      |
| TGME49_315620 | -5.11  | 7.07  | 6.47E-14 | 3.19E-12 | vacuolar ATP synthase subunit C, putative             |
| TGME49_260500 | -1.98  | 9.04  | 7.38E-14 | 3.61E-12 | COPI associated protein, putative                     |
| TGME49_259550 | -2.93  | 7.66  | 7.63E-14 | 3.71E-12 | dihydropteroate synthase                              |
| TGME49_231150 | 3.03   | 5.08  | 9.41E-14 | 4.55E-12 | hypothetical protein                                  |
| TGME49_239020 | -10.28 | 6.19  | 9.61E-14 | 4.62E-12 | ABC transporter transmembrane region domain-cont      |
| TGME49_298620 | -5.08  | 6.83  | 1.05E-13 | 5.00E-12 | hypothetical protein                                  |
| TGME49_216820 | 1.54   | 8.57  | 1.08E-13 | 5.12E-12 | transporter, major facilitator family protein         |
| TGME49_221590 | 1.58   | 8.78  | 1.18E-13 | 5.58E-12 | dual specificity phosphatase, catalytic domain-contai |
| TGME49_300220 | -3.20  | 7.60  | 1.55E-13 | 7.22E-12 | hypothetical protein                                  |
| TGME49_249350 | -10.09 | 6.75  | 1.76E-13 | 8.12E-12 | esterase/lipase/thioesterase domain-containing prot   |
| TGME49_255180 | -10.08 | 6.36  | 1.80E-13 | 8.26E-12 | ubiquitin carboxyl-terminal hydrolase                 |
| TGME49_216140 | 2.28   | 7.52  | 1.96E-13 | 8.96E-12 | tetratricopeptide repeat-containing protein           |
| TGME49_294690 | 1.96   | 7.53  | 2.04E-13 | 9.25E-12 | rhomboid protease ROM5                                |

|               |        |       |          |          |                                                       |
|---------------|--------|-------|----------|----------|-------------------------------------------------------|
| TGME49_244530 | 1.56   | 8.53  | 2.06E-13 | 9.27E-12 | hypothetical protein                                  |
| TGME49_295990 | 1.76   | 7.35  | 2.15E-13 | 9.61E-12 | ubiquitin conjugating enzyme E2, putative             |
| TGME49_220880 | 2.15   | 6.18  | 2.30E-13 | 1.03E-11 | hypothetical protein                                  |
| TGME49_254050 | 1.81   | 6.83  | 2.54E-13 | 1.13E-11 | optic atrophy 3 protein (opa3) protein                |
| TGME49_295440 | 2.62   | 5.97  | 2.56E-13 | 1.13E-11 | hypothetical protein                                  |
| TGME49_210408 | 1.13   | 10.69 | 2.93E-13 | 1.28E-11 | HMG (high mobility group) box domain-containing pr    |
| TGME49_237015 | 1.75   | 7.91  | 3.36E-13 | 1.46E-11 | hypothetical protein                                  |
| TGME49_250030 | 2.66   | 5.24  | 3.73E-13 | 1.61E-11 | hypothetical protein                                  |
| TGME49_291890 | 1.33   | 11.01 | 3.85E-13 | 1.65E-11 | microneme protein MIC1                                |
| TGME49_203300 | 2.78   | 7.42  | 3.93E-13 | 1.67E-11 | hypothetical protein                                  |
| TGME49_213255 | -5.17  | 5.85  | 3.92E-13 | 1.67E-11 | hypothetical protein                                  |
| TGME49_321530 | 1.44   | 8.75  | 4.04E-13 | 1.71E-11 | cathepsin CPL                                         |
| TGME49_320588 | -10.06 | 6.31  | 4.09E-13 | 1.72E-11 | glycosyl hydrolases family 35 protein                 |
| TGME49_253170 | 1.61   | 7.37  | 4.28E-13 | 1.79E-11 | zinc carboxypeptidase, putative                       |
| TGME49_270580 | -10.08 | 5.66  | 4.87E-13 | 2.02E-11 | HECT-domain (ubiquitin-transferase) domain-contain    |
| TGME49_316280 | -5.04  | 6.90  | 4.98E-13 | 2.06E-11 | transporter, major facilitator family protein         |
| TGME49_288860 | -5.22  | 6.98  | 5.57E-13 | 2.29E-11 | RuvB family 2 protein                                 |
| TGME49_286470 | 1.35   | 8.36  | 6.04E-13 | 2.47E-11 | AGC kinase                                            |
| TGME49_241830 | 2.13   | 5.87  | 6.26E-13 | 2.54E-11 | peptidyl-prolyl cis-trans isomerase                   |
| TGME49_214230 | 1.80   | 6.85  | 7.03E-13 | 2.83E-11 | Dopey, N-terminal domain-containing protein           |
| TGME49_263870 | -5.03  | 6.97  | 7.64E-13 | 3.06E-11 | glutamate-tRNA ligase                                 |
| TGME49_294610 | -1.61  | 9.34  | 8.25E-13 | 3.28E-11 | histone lysine methyltransferase, SET, putative       |
| TGME49_239420 | 1.11   | 9.63  | 8.72E-13 | 3.45E-11 | protein kinase                                        |
| TGME49_228280 | 2.37   | 5.71  | 1.08E-12 | 4.26E-11 | hypothetical protein                                  |
| TGME49_247530 | 3.16   | 8.95  | 1.19E-12 | 4.65E-11 | hypothetical protein                                  |
| TGME49_269840 | 1.41   | 7.95  | 1.23E-12 | 4.79E-11 | proteasome regulatory subunit                         |
| TGME49_212900 | 1.59   | 8.11  | 1.44E-12 | 5.56E-11 | hypothetical protein                                  |
| TGME49_285140 | -10.00 | 6.26  | 1.48E-12 | 5.69E-11 | hypothetical protein                                  |
| TGME49_294770 | -4.97  | 6.84  | 1.52E-12 | 5.81E-11 | Armadillo/beta-catenin family repeat-containing prot  |
| TGME49_229020 | -9.96  | 6.41  | 1.62E-12 | 6.16E-11 | cell-cycle-associated protein kinase CDK, putative    |
| TGME49_257290 | -10.23 | 5.89  | 1.64E-12 | 6.21E-11 | RNA 2'-phosphotransferase, Tpt1/KptA family protein   |
| TGME49_255650 | -10.24 | 7.05  | 2.27E-12 | 8.57E-11 | DHHC zinc finger domain-containing protein            |
| TGME49_244910 | -4.10  | 6.82  | 2.30E-12 | 8.65E-11 | MIZ/SP-RING zinc finger domain-containing protein     |
| TGME49_237210 | -4.90  | 6.72  | 2.54E-12 | 9.49E-11 | Tyrosine kinase-like (TKL) protein                    |
| TGME49_213920 | -3.63  | 6.79  | 2.62E-12 | 9.73E-11 | hypothetical protein                                  |
| TGME49_252880 | -2.76  | 7.29  | 2.76E-12 | 1.02E-10 | hypothetical protein                                  |
| TGME49_269970 | 1.73   | 6.91  | 3.07E-12 | 1.13E-10 | hypothetical protein                                  |
| TGME49_263550 | 1.82   | 6.57  | 3.12E-12 | 1.14E-10 | 39S ribosomal protein L47, mitochondrial precursor,   |
| TGME49_266070 | 1.25   | 9.66  | 3.38E-12 | 1.23E-10 | ribosomal protein RPL31                               |
| TGME49_275755 | 3.25   | 4.98  | 3.68E-12 | 1.34E-10 | hypothetical protein                                  |
| TGME49_230410 | -2.13  | 8.00  | 3.74E-12 | 1.35E-10 | peroxiredoxin PRX3                                    |
| TGME49_254470 | 1.48   | 9.18  | 3.77E-12 | 1.35E-10 | hypothetical protein                                  |
| TGME49_263490 | 2.29   | 5.71  | 3.81E-12 | 1.36E-10 | ubiquitin conjugating enzyme E2, putative             |
| TGME49_220950 | 1.59   | 9.89  | 4.00E-12 | 1.42E-10 | hypothetical protein                                  |
| TGME49_289710 | -2.62  | 7.42  | 4.09E-12 | 1.45E-10 | AP2 domain transcription factor AP2IX-5               |
| TGME49_242090 | 1.04   | 9.97  | 4.62E-12 | 1.63E-10 | zinc finger (CCCH type) motif-containing protein      |
| TGME49_244880 | -4.05  | 6.91  | 4.64E-12 | 1.63E-10 | DNA-directed RNA polymerase I RPA1                    |
| TGME49_209440 | -2.34  | 7.38  | 4.73E-12 | 1.65E-10 | hypothetical protein                                  |
| TGME49_205265 | 2.34   | 6.35  | 4.80E-12 | 1.67E-10 | transporter, cation channel family protein            |
| TGME49_245510 | -2.58  | 7.52  | 4.93E-12 | 1.70E-10 | phospholipid-translocating P-type ATPase, flippase su |
| TGME49_214350 | -2.91  | 7.39  | 4.95E-12 | 1.70E-10 | GTP-binding protein, putative                         |
| TGME49_228660 | -3.59  | 6.95  | 5.00E-12 | 1.71E-10 | Sec7 domain-containing protein                        |
| TGME49_226910 | -4.89  | 6.44  | 5.61E-12 | 1.91E-10 | Amylo-alpha-1,6-glucosidase                           |
| TGME49_200350 | 3.12   | 5.77  | 6.43E-12 | 2.17E-10 | subtilisin SUB3                                       |
| TGME49_278940 | 1.80   | 6.96  | 6.44E-12 | 2.17E-10 | HECT-domain (ubiquitin-transferase) domain-contain    |

|               |       |       |          |          |                                                       |
|---------------|-------|-------|----------|----------|-------------------------------------------------------|
| TGME49_316660 | -9.87 | 6.50  | 6.74E-12 | 2.27E-10 | cullin family protein                                 |
| TGME49_305180 | -9.86 | 6.43  | 6.84E-12 | 2.29E-10 | Na <sup>+</sup> /H <sup>+</sup> exchanger NHE3        |
| TGME49_275870 | 2.54  | 5.59  | 6.91E-12 | 2.30E-10 | tubulin/FtsZ family, GTPase domain-containing prote   |
| TGME49_294990 | -9.90 | 6.22  | 7.15E-12 | 2.37E-10 | hypothetical protein                                  |
| TGME49_217520 | 1.29  | 8.89  | 7.39E-12 | 2.43E-10 | hypothetical protein                                  |
| TGME49_201390 | 1.07  | 10.65 | 7.93E-12 | 2.59E-10 | hypothetical protein                                  |
| TGME49_236670 | 2.50  | 6.27  | 8.29E-12 | 2.70E-10 | hypothetical protein                                  |
| TGME49_242290 | -2.37 | 7.99  | 8.81E-12 | 2.86E-10 | proteasome subunit alpha1, putative                   |
| TGME49_310450 | -2.75 | 7.13  | 9.13E-12 | 2.95E-10 | myosin heavy chain, putative                          |
| TGME49_221675 | 1.45  | 7.82  | 9.64E-12 | 3.10E-10 | hypothetical protein                                  |
| TGME49_260440 | 1.37  | 9.39  | 1.07E-11 | 3.43E-10 | nuclear factor NF3                                    |
| TGME49_247330 | -2.74 | 6.92  | 1.15E-11 | 3.65E-10 | hypothetical protein                                  |
| TGME49_290170 | -2.60 | 7.34  | 1.17E-11 | 3.71E-10 | kelch repeat domain containing/Serine/threonine pro   |
| TGME49_239800 | -3.25 | 6.90  | 1.19E-11 | 3.75E-10 | hypothetical protein                                  |
| TGME49_239540 | -9.86 | 6.42  | 1.21E-11 | 3.81E-10 | LEM3 (ligand-effect modulator 3) family / CDC50 fam   |
| TGME49_286120 | -2.26 | 8.02  | 1.23E-11 | 3.84E-10 | prolyl endopeptidase                                  |
| TGME49_266410 | 1.99  | 6.23  | 1.23E-11 | 3.85E-10 | hypothetical protein                                  |
| TGME49_254220 | 2.34  | 5.45  | 1.31E-11 | 4.05E-10 | hypothetical protein                                  |
| TGME49_277940 | -4.02 | 6.79  | 1.30E-11 | 4.05E-10 | hypothetical protein                                  |
| TGME49_204530 | 1.30  | 11.00 | 1.47E-11 | 4.54E-10 | microneme protein MIC11                               |
| TGME49_298830 | 2.37  | 6.26  | 1.52E-11 | 4.66E-10 | hypothetical protein                                  |
| TGME49_259240 | 1.36  | 9.56  | 1.57E-11 | 4.81E-10 | ribosomal protein RPS21                               |
| TGME49_269690 | 1.49  | 8.07  | 1.80E-11 | 5.47E-10 | hypothetical protein                                  |
| TGME49_253860 | 1.41  | 7.25  | 1.92E-11 | 5.83E-10 | Tyrosine kinase-like (TKL) protein                    |
| TGME49_265790 | 1.22  | 8.70  | 1.98E-11 | 5.96E-10 | hypothetical protein                                  |
| TGME49_201860 | 1.09  | 10.42 | 2.12E-11 | 6.38E-10 | hypothetical protein                                  |
| TGME49_213410 | -2.18 | 7.73  | 2.15E-11 | 6.44E-10 | small nuclear ribonucleoprotein f (snrnp-f), putative |
| TGME49_278870 | -1.62 | 8.87  | 2.17E-11 | 6.47E-10 | myosin F                                              |
| TGME49_204520 | 2.76  | 4.97  | 2.29E-11 | 6.80E-10 | hypothetical protein                                  |
| TGME49_227810 | 1.34  | 8.87  | 2.35E-11 | 6.94E-10 | roptry kinase family protein ROP11 (incomplete cata   |
| TGME49_257700 | 3.12  | 5.46  | 2.41E-11 | 7.09E-10 | hypothetical protein                                  |
| TGME49_257520 | 1.64  | 7.16  | 2.56E-11 | 7.50E-10 | synaptobrevin protein                                 |
| TGME49_201785 | 1.34  | 8.40  | 2.91E-11 | 8.51E-10 | hypothetical protein                                  |
| TGME49_208530 | -3.01 | 7.28  | 3.11E-11 | 9.02E-10 | nicotinate phosphoribosyltransferase                  |
| TGME49_232500 | -9.78 | 6.44  | 3.16E-11 | 9.13E-10 | hypothetical protein                                  |
| TGME49_294550 | -1.96 | 8.00  | 3.19E-11 | 9.17E-10 | dynein heavy chain                                    |
| TGME49_319880 | -4.75 | 6.31  | 3.54E-11 | 1.02E-09 | MORN repeat-containing protein                        |
| TGME49_260180 | -2.09 | 7.68  | 3.67E-11 | 1.05E-09 | hypothetical protein                                  |
| TGME49_297940 | -2.13 | 7.42  | 3.76E-11 | 1.07E-09 | single-strand binding protein                         |
| TGME49_217700 | -9.79 | 6.41  | 4.07E-11 | 1.15E-09 | AP2 domain transcription factor AP2XII-2              |
| TGME49_253090 | 2.14  | 5.86  | 4.21E-11 | 1.19E-09 | DEAD/DEAH box helicase domain-containing protein      |
| TGME49_286460 | 2.96  | 5.00  | 4.32E-11 | 1.21E-09 | hypothetical protein                                  |
| TGME49_247960 | 2.01  | 6.05  | 4.36E-11 | 1.22E-09 | hypothetical protein                                  |
| TGME49_203720 | 3.14  | 8.00  | 4.41E-11 | 1.23E-09 | vitamin k epoxide reductase family protein            |
| TGME49_205170 | 2.05  | 8.72  | 4.45E-11 | 1.24E-09 | hypothetical protein                                  |
| TGME49_265390 | -9.76 | 6.16  | 4.57E-11 | 1.27E-09 | hypothetical protein                                  |
| TGME49_292130 | -1.30 | 9.66  | 4.75E-11 | 1.31E-09 | ribosomal protein RPL13A                              |
| TGME49_207680 | -3.93 | 7.02  | 4.77E-11 | 1.31E-09 | suppressor of kinetochore protein 1, putative         |
| TGME49_225790 | 1.70  | 7.33  | 4.80E-11 | 1.31E-09 | PDI family protein                                    |
| TGME49_214140 | 1.33  | 8.62  | 4.93E-11 | 1.33E-09 | hypothetical protein                                  |
| TGME49_238895 | -3.03 | 7.20  | 4.92E-11 | 1.33E-09 | hypothetical protein                                  |
| TGME49_231430 | -9.75 | 6.39  | 4.92E-11 | 1.33E-09 | oligosaccharyl transferase stt3 protein, putative     |
| TGME49_310030 | -2.08 | 7.62  | 5.18E-11 | 1.39E-09 | cyclase-associated protein, putative                  |
| TGME49_226500 | -4.91 | 6.63  | 5.42E-11 | 1.45E-09 | hypothetical protein                                  |
| TGME49_278815 | -3.98 | 6.59  | 5.80E-11 | 1.54E-09 | hypothetical protein                                  |

|               |       |       |          |          |                                                      |
|---------------|-------|-------|----------|----------|------------------------------------------------------|
| TGME49_310750 | -1.99 | 8.35  | 5.91E-11 | 1.57E-09 | emp24/gp25L/p24 family protein                       |
| TGME49_313870 | 1.67  | 7.32  | 5.97E-11 | 1.58E-09 | zinc finger, C3HC4 type (RING finger) domain-contain |
| TGME49_217420 | -4.93 | 6.00  | 6.27E-11 | 1.65E-09 | hypothetical protein                                 |
| TGME49_294630 | -2.14 | 7.75  | 6.38E-11 | 1.67E-09 | hypothetical protein                                 |
| TGME49_251800 | 2.31  | 5.67  | 7.19E-11 | 1.88E-09 | hypothetical protein                                 |
| TGME49_250330 | -9.74 | 6.25  | 7.21E-11 | 1.88E-09 | hypothetical protein                                 |
| TGME49_217820 | -2.54 | 7.71  | 7.27E-11 | 1.89E-09 | PCI domain-containing protein                        |
| TGME49_289580 | -9.72 | 6.04  | 7.36E-11 | 1.90E-09 | strictosidine synthase subfamily protein             |
| TGME49_226810 | -3.51 | 6.80  | 7.46E-11 | 1.92E-09 | histone lysine methyltransferase SET1                |
| TGME49_313290 | 1.62  | 6.91  | 7.66E-11 | 1.97E-09 | MORN repeat-containing protein                       |
| TGME49_245460 | 1.09  | 10.31 | 7.70E-11 | 1.97E-09 | ribosomal protein RPS8                               |
| TGME49_316600 | 1.38  | 8.03  | 8.44E-11 | 2.15E-09 | hypothetical protein                                 |
| TGME49_255410 | -4.73 | 6.62  | 8.48E-11 | 2.15E-09 | hypothetical protein                                 |
| TGME49_261620 | 2.13  | 5.83  | 8.73E-11 | 2.20E-09 | hypothetical protein                                 |
| TGME49_275610 | -1.70 | 8.61  | 8.95E-11 | 2.25E-09 | protein kinase, other                                |
| TGME49_261480 | 1.95  | 6.87  | 9.98E-11 | 2.50E-09 | phosphatidyl serine synthase                         |
| TGME49_229690 | -9.70 | 6.55  | 1.16E-10 | 2.90E-09 | autophagy-related protein 7 atg7, putative           |
| TGME49_310220 | -4.80 | 6.48  | 1.18E-10 | 2.93E-09 | hypothetical protein                                 |
| TGME49_208450 | 1.40  | 8.60  | 1.22E-10 | 3.02E-09 | protease inhibitor PI2                               |
| TGME49_220930 | -2.68 | 7.43  | 1.40E-10 | 3.45E-09 | hypothetical protein                                 |
| TGME49_209060 | -3.86 | 6.66  | 1.46E-10 | 3.61E-09 | thrombospondin type 1 domain-containing protein      |
| TGME49_280390 | -2.94 | 6.88  | 1.47E-10 | 3.62E-09 | HEAT repeat-containing protein                       |
| TGME49_202980 | -2.59 | 7.20  | 1.55E-10 | 3.80E-09 | hypothetical protein                                 |
| TGME49_232280 | -9.83 | 6.42  | 1.56E-10 | 3.80E-09 | hypothetical protein                                 |
| TGME49_265870 | -3.49 | 6.97  | 1.57E-10 | 3.81E-09 | pantoate-beta-alanine ligase                         |
| TGME49_278050 | -2.32 | 7.70  | 1.59E-10 | 3.86E-09 | proteasome subunit alpha type 1, putative            |
| TGME49_295360 | 1.14  | 9.30  | 1.72E-10 | 4.14E-09 | hypothetical protein                                 |
| TGME49_219520 | -2.28 | 7.68  | 1.73E-10 | 4.18E-09 | histone arginine methyltransferase PRMT1             |
| TGME49_284190 | -4.12 | 6.62  | 1.75E-10 | 4.20E-09 | pyruvate carboxylase                                 |
| TGME49_261400 | -2.00 | 7.86  | 1.90E-10 | 4.54E-09 | hypothetical protein                                 |
| TGME49_215390 | 2.61  | 4.82  | 1.97E-10 | 4.70E-09 | TIM10 family protein, putative                       |
| TGME49_318770 | -4.68 | 6.44  | 2.09E-10 | 4.97E-09 | aurora kinase(incomplete catalytic triad)            |
| TGME49_315780 | -3.15 | 6.99  | 2.23E-10 | 5.28E-09 | myosin regulatory light chain, putative              |
| TGME49_257490 | -3.88 | 6.62  | 2.34E-10 | 5.54E-09 | prefoldin subunit superfamily protein                |
| TGME49_301270 | 1.26  | 8.03  | 2.37E-10 | 5.58E-09 | Tyrosine kinase-like (TKL) protein                   |
| TGME49_247360 | 2.39  | 7.48  | 2.58E-10 | 6.05E-09 | PAP2 superfamily protein                             |
| TGME49_231120 | 1.93  | 6.29  | 2.64E-10 | 6.18E-09 | ribosomal protein S11, putative                      |
| TGME49_282000 | 1.99  | 6.72  | 2.68E-10 | 6.26E-09 | hypothetical protein                                 |
| TGME49_258470 | 1.46  | 11.23 | 2.73E-10 | 6.36E-09 | hypothetical protein                                 |
| TGME49_240280 | -2.24 | 7.78  | 2.88E-10 | 6.63E-09 | S1/P1nuclease                                        |
| TGME49_268176 | -2.90 | 7.14  | 2.88E-10 | 6.63E-09 | hypothetical protein                                 |
| TGME49_275630 | -2.31 | 7.61  | 3.13E-10 | 7.19E-09 | HECT-domain (ubiquitin-transferase) domain-contain   |
| TGME49_311460 | -3.71 | 6.70  | 3.19E-10 | 7.29E-09 | hypothetical protein                                 |
| TGME49_225745 | -9.66 | 6.00  | 3.27E-10 | 7.47E-09 | hypothetical protein                                 |
| TGME49_292160 | 1.89  | 6.10  | 3.43E-10 | 7.78E-09 | hypothetical protein                                 |
| TGME49_270930 | -3.19 | 6.90  | 3.48E-10 | 7.87E-09 | hypothetical protein                                 |
| TGME49_263630 | 1.32  | 7.63  | 3.51E-10 | 7.92E-09 | hypothetical protein                                 |
| TGME49_320130 | 1.91  | 5.97  | 3.63E-10 | 8.16E-09 | hypothetical protein                                 |
| TGME49_264830 | -4.61 | 6.49  | 3.84E-10 | 8.61E-09 | hypothetical protein                                 |
| TGME49_291940 | -4.60 | 6.39  | 3.92E-10 | 8.74E-09 | hypothetical protein                                 |
| TGME49_259115 | -3.62 | 6.99  | 4.03E-10 | 8.96E-09 | ABC1 family protein                                  |
| TGME49_221830 | 3.37  | 5.06  | 4.07E-10 | 8.98E-09 | subtilisin SUB12                                     |
| TGME49_250840 | -9.60 | 6.18  | 4.07E-10 | 8.98E-09 | hypothetical protein                                 |
| TGME49_276970 | -3.38 | 6.73  | 4.19E-10 | 9.22E-09 | hypothetical protein                                 |
| TGME49_250340 | -2.25 | 7.79  | 4.21E-10 | 9.24E-09 | centrin 2                                            |

|               |       |      |          |          |                                                        |
|---------------|-------|------|----------|----------|--------------------------------------------------------|
| TGME49_219730 | 1.51  | 7.57 | 4.25E-10 | 9.29E-09 | hypothetical protein                                   |
| TGME49_306060 | -1.32 | 9.70 | 4.26E-10 | 9.29E-09 | rhoptry neck protein RON8                              |
| TGME49_294640 | -1.47 | 8.84 | 4.39E-10 | 9.55E-09 | ribonucleoside-diphosphate reductase large chain       |
| TGME49_316470 | -3.66 | 6.01 | 4.42E-10 | 9.59E-09 | hypothetical protein                                   |
| TGME49_293740 | 1.93  | 8.89 | 4.56E-10 | 9.83E-09 | hypothetical protein                                   |
| TGME49_253750 | 1.94  | 8.98 | 4.68E-10 | 1.01E-08 | PLU-1 family protein                                   |
| TGME49_284598 | -9.64 | 5.10 | 4.87E-10 | 1.04E-08 | haloacid dehalogenase family hydrolase domain-cont     |
| TGME49_297910 | -4.84 | 5.66 | 5.14E-10 | 1.10E-08 | hypothetical protein                                   |
| TGME49_293190 | -2.84 | 7.38 | 5.30E-10 | 1.13E-08 | endonuclease/exonuclease/phosphatase family prote      |
| TGME49_315530 | -4.61 | 6.48 | 5.51E-10 | 1.17E-08 | hypothetical protein                                   |
| TGME49_210245 | -9.73 | 5.61 | 5.72E-10 | 1.21E-08 | hypothetical protein                                   |
| TGME49_226705 | -9.73 | 6.39 | 6.08E-10 | 1.28E-08 | hypothetical protein                                   |
| TGME49_205010 | -2.22 | 7.49 | 6.29E-10 | 1.32E-08 | U2 small nuclear ribonucleoprotein family protein, pu  |
| TGME49_224540 | -9.79 | 6.05 | 6.35E-10 | 1.33E-08 | hypothetical protein                                   |
| TGME49_268980 | 1.49  | 7.97 | 6.62E-10 | 1.39E-08 | hypothetical protein                                   |
| TGME49_294400 | -2.37 | 7.26 | 6.67E-10 | 1.39E-08 | hypothetical protein                                   |
| TGME49_314410 | -2.52 | 7.22 | 6.69E-10 | 1.39E-08 | aquarius, putative                                     |
| TGME49_243430 | 2.08  | 7.87 | 7.21E-10 | 1.49E-08 | OTU family cysteine protease                           |
| TGME49_218530 | -9.55 | 6.40 | 7.22E-10 | 1.49E-08 | proteasome-interacting thioredoxin domain-containi     |
| TGME49_200320 | -2.54 | 7.39 | 7.57E-10 | 1.56E-08 | hypoxanthine-xanthine-guanine phosphoribosyl trans     |
| TGME49_214960 | 1.61  | 7.09 | 7.95E-10 | 1.64E-08 | AP2 domain transcription factor AP2X-8                 |
| TGME49_258670 | -9.80 | 5.62 | 8.08E-10 | 1.66E-08 | hypothetical protein                                   |
| TGME49_290580 | -4.58 | 6.04 | 8.15E-10 | 1.67E-08 | ATP-binding cassette G family transporter ABCG89       |
| TGME49_305060 | 1.38  | 7.66 | 8.23E-10 | 1.68E-08 | CAP-Gly domain-containing protein                      |
| TGME49_260800 | 1.71  | 6.32 | 8.25E-10 | 1.68E-08 | hypothetical protein                                   |
| TGME49_262380 | -3.08 | 7.00 | 8.57E-10 | 1.74E-08 | elongation factor Tu, putative                         |
| TGME49_253470 | 1.71  | 7.35 | 8.73E-10 | 1.76E-08 | alveolin domain containing intermediate filament IM    |
| TGME49_244500 | -2.01 | 7.47 | 8.74E-10 | 1.76E-08 | Tubulin-tyrosine ligase family protein                 |
| TGME49_236860 | -4.69 | 6.13 | 8.72E-10 | 1.76E-08 | haloacid dehalogenase family hydrolase domain-cont     |
| TGME49_297745 | -4.28 | 6.99 | 9.01E-10 | 1.81E-08 | hypothetical protein                                   |
| TGME49_254410 | 1.74  | 6.78 | 9.08E-10 | 1.82E-08 | protein phosphatase 2C, putative                       |
| TGME49_273050 | 1.75  | 6.54 | 9.29E-10 | 1.86E-08 | hypothetical protein                                   |
| TGME49_217400 | -3.18 | 6.55 | 9.49E-10 | 1.89E-08 | hypothetical protein                                   |
| TGME49_203830 | -3.78 | 6.38 | 9.64E-10 | 1.92E-08 | FHA domain-containing protein                          |
| TGME49_214970 | -1.69 | 8.91 | 1.00E-09 | 1.99E-08 | DNA replication licensing factor, putative             |
| TGME49_254030 | 2.17  | 8.18 | 1.01E-09 | 2.00E-08 | zinc finger CDGSH-type domain-containing protein       |
| TGME49_290200 | -1.63 | 8.88 | 1.02E-09 | 2.01E-08 | NAD/NADP octopine/nopaline dehydrogenase, alpha        |
| TGME49_205580 | 1.39  | 7.01 | 1.03E-09 | 2.02E-08 | nuclear factor NF4                                     |
| TGME49_261750 | -2.87 | 6.81 | 1.07E-09 | 2.10E-08 | rhoptry neck protein RON10                             |
| TGME49_294870 | 1.00  | 9.50 | 1.13E-09 | 2.21E-08 | universal stress family protein                        |
| TGME49_202920 | -9.54 | 6.07 | 1.21E-09 | 2.35E-08 | p-aminobenzoic acid synthase                           |
| TGME49_299780 | 1.64  | 9.06 | 1.29E-09 | 2.52E-08 | hypothetical protein                                   |
| TGME49_246930 | -2.30 | 7.26 | 1.30E-09 | 2.52E-08 | calmodulin CAM1                                        |
| TGME49_231410 | -2.14 | 8.15 | 1.33E-09 | 2.58E-08 | hypothetical protein                                   |
| TGME49_210230 | -9.59 | 5.90 | 1.35E-09 | 2.60E-08 | hypothetical protein                                   |
| TGME49_213730 | 1.28  | 7.74 | 1.48E-09 | 2.85E-08 | lanthionine synthetase C family protein                |
| TGME49_259710 | -3.08 | 7.07 | 1.49E-09 | 2.86E-08 | protein kinase                                         |
| TGME49_272410 | 1.54  | 6.75 | 1.53E-09 | 2.92E-08 | phosphogluconate dehydrogenase (decarboxylating),      |
| TGME49_305860 | -2.23 | 7.93 | 1.53E-09 | 2.92E-08 | calcium-dependent protein kinase CDPK3                 |
| TGME49_237550 | 2.61  | 6.56 | 1.57E-09 | 2.99E-08 | hypothetical protein                                   |
| TGME49_271820 | -9.52 | 5.98 | 1.58E-09 | 3.00E-08 | lipoyltransferase and lipoate-protein ligase subfamily |
| TGME49_320640 | -9.58 | 6.10 | 1.59E-09 | 3.01E-08 | peptidylprolyl isomerase domain-containing protein     |
| TGME49_306338 | -2.72 | 5.98 | 1.60E-09 | 3.02E-08 | dynein gamma chain, flagellar outer arm, putative      |
| TGME49_226590 | 1.73  | 9.66 | 1.64E-09 | 3.09E-08 | cytochrome C oxidase subunit IIa, putative             |
| TGME49_277720 | -2.24 | 7.54 | 1.68E-09 | 3.15E-08 | GDA1/CD39 (nucleoside phosphatase) family protein      |

|               |       |       |          |          |                                                                  |
|---------------|-------|-------|----------|----------|------------------------------------------------------------------|
| TGME49_279340 | 1.85  | 6.26  | 1.72E-09 | 3.23E-08 | hypothetical protein                                             |
| TGME49_291040 | 4.27  | 6.75  | 1.76E-09 | 3.29E-08 | lactate dehydrogenase LDH2                                       |
| TGME49_288400 | -9.50 | 6.03  | 1.76E-09 | 3.29E-08 | LETM1 family protein                                             |
| TGME49_245980 | 2.90  | 7.53  | 1.87E-09 | 3.48E-08 | hypothetical protein                                             |
| TGME49_289150 | 1.83  | 6.22  | 1.88E-09 | 3.49E-08 | hypothetical protein                                             |
| TGME49_286450 | 1.00  | 12.69 | 1.95E-09 | 3.61E-08 | dense granule protein GRA5                                       |
| TGME49_299250 | 2.76  | 6.36  | 2.07E-09 | 3.82E-08 | hypothetical protein                                             |
| TGME49_296010 | -1.76 | 7.91  | 2.10E-09 | 3.87E-08 | phosphatidylinositol 3- and 4-kinase                             |
| TGME49_200360 | 2.31  | 9.74  | 2.16E-09 | 3.96E-08 | hypothetical protein                                             |
| TGME49_235630 | 1.36  | 7.24  | 2.16E-09 | 3.96E-08 | hypothetical protein                                             |
| TGME49_274190 | -4.60 | 6.59  | 2.21E-09 | 4.04E-08 | eukaryotic initiation factor 2B epsilon subunit, putative        |
| TGME49_216430 | -1.88 | 7.55  | 2.43E-09 | 4.43E-08 | TBC domain-containing protein                                    |
| TGME49_249230 | -4.63 | 6.14  | 2.44E-09 | 4.45E-08 | hypothetical protein                                             |
| TGME49_264140 | -2.24 | 7.26  | 2.46E-09 | 4.46E-08 | hypothetical protein                                             |
| TGME49_214200 | -9.55 | 5.94  | 2.50E-09 | 4.53E-08 | WD domain, G-beta repeat-containing protein                      |
| TGME49_246580 | -3.68 | 6.71  | 2.62E-09 | 4.74E-08 | hypothetical protein                                             |
| TGME49_239260 | 3.42  | 4.79  | 2.81E-09 | 5.07E-08 | histone H4                                                       |
| TGME49_310130 | -9.44 | 6.05  | 2.85E-09 | 5.12E-08 | Spc97 / Spc98 family protein                                     |
| TGME49_268230 | -9.74 | 6.51  | 2.85E-09 | 5.12E-08 | hypothetical protein                                             |
| TGME49_304740 | 1.11  | 8.67  | 2.93E-09 | 5.25E-08 | rhoGTPase family protein ROP35                                   |
| TGME49_290720 | -1.86 | 7.52  | 3.12E-09 | 5.57E-08 | vacuolar proton translocating ATPase subunit, putative           |
| TGME49_305470 | -9.47 | 5.79  | 3.17E-09 | 5.65E-08 | hypothetical protein                                             |
| TGME49_206550 | 3.26  | 6.05  | 3.20E-09 | 5.69E-08 | hypothetical protein                                             |
| TGME49_306660 | 1.30  | 7.88  | 3.21E-09 | 5.69E-08 | RNA pseudouridine synthase superfamily protein                   |
| TGME49_261070 | -3.67 | 6.54  | 3.31E-09 | 5.86E-08 | apicoplast triosephosphate translocator APT1                     |
| TGME49_217020 | -4.05 | 6.25  | 3.37E-09 | 5.94E-08 | ATPase, AFG1 family protein                                      |
| TGME49_237890 | -4.49 | 6.17  | 3.37E-09 | 5.94E-08 | calcium-dependent protein kinase CDPK4                           |
| TGME49_270270 | -3.76 | 6.69  | 3.44E-09 | 6.04E-08 | hypothetical protein                                             |
| TGME49_312110 | -2.43 | 7.05  | 3.54E-09 | 6.21E-08 | apicoplast-associated thioredoxin family protein Atrx            |
| TGME49_226260 | 1.38  | 7.26  | 3.59E-09 | 6.28E-08 | hypothetical protein                                             |
| TGME49_318525 | -2.33 | 6.78  | 3.62E-09 | 6.31E-08 | hypothetical protein                                             |
| TGME49_297530 | -9.43 | 6.26  | 3.71E-09 | 6.45E-08 | DNA-directed RNA polymerase I RPA2                               |
| TGME49_294830 | -3.42 | 6.45  | 3.94E-09 | 6.84E-08 | methyltransferase domain-containing protein                      |
| TGME49_312960 | 1.72  | 6.29  | 4.19E-09 | 7.25E-08 | hypothetical protein                                             |
| TGME49_214575 | 1.73  | 5.96  | 4.25E-09 | 7.33E-08 | hypothetical protein                                             |
| TGME49_247300 | 1.39  | 8.35  | 4.25E-09 | 7.33E-08 | hypothetical protein                                             |
| TGME49_248990 | 1.70  | 8.43  | 4.37E-09 | 7.52E-08 | hypothetical protein                                             |
| TGME49_257350 | 1.35  | 8.60  | 4.52E-09 | 7.74E-08 | eukaryotic translation initiation factor, putative               |
| TGME49_289570 | 1.27  | 7.68  | 4.53E-09 | 7.74E-08 | phosphatidylinositol transfer protein                            |
| TGME49_319370 | -9.43 | 6.12  | 4.53E-09 | 7.74E-08 | hypothetical protein                                             |
| TGME49_285180 | -1.87 | 7.32  | 4.61E-09 | 7.84E-08 | hypothetical protein                                             |
| TGME49_259010 | -4.48 | 6.71  | 4.61E-09 | 7.84E-08 | vacuolar ATP synthase subunit d, putative                        |
| TGME49_268225 | -4.79 | 6.81  | 4.71E-09 | 7.98E-08 | hypothetical protein                                             |
| TGME49_293660 | -3.66 | 6.63  | 4.75E-09 | 8.03E-08 | hypothetical protein                                             |
| TGME49_219080 | -9.43 | 5.98  | 4.79E-09 | 8.06E-08 | edge expressed protein, putative                                 |
| TGME49_206690 | -2.42 | 7.05  | 4.83E-09 | 8.12E-08 | glideosome-associated protein with multiple-membrane association |
| TGME49_263540 | 2.32  | 5.09  | 5.03E-09 | 8.43E-08 | hypothetical protein                                             |
| TGME49_318310 | -1.89 | 7.63  | 5.17E-09 | 8.65E-08 | transketolase                                                    |
| TGME49_231950 | 1.71  | 7.62  | 5.25E-09 | 8.76E-08 | hypothetical protein                                             |
| TGME49_240860 | -3.68 | 6.54  | 5.37E-09 | 8.93E-08 | acyltransferase domain-containing protein                        |
| TGME49_286260 | -9.40 | 5.83  | 5.38E-09 | 8.93E-08 | tetratricopeptide repeat-containing protein                      |
| TGME49_257360 | 1.80  | 6.17  | 5.44E-09 | 9.03E-08 | hypothetical protein                                             |
| TGME49_289540 | 1.20  | 8.17  | 5.49E-09 | 9.06E-08 | hypothetical protein                                             |
| TGME49_319580 | -9.39 | 5.99  | 5.49E-09 | 9.06E-08 | hypothetical protein                                             |
| TGME49_217550 | 1.24  | 7.73  | 5.61E-09 | 9.22E-08 | hypothetical protein                                             |

|               |       |      |          |          |                                                             |
|---------------|-------|------|----------|----------|-------------------------------------------------------------|
| TGME49_254370 | -1.59 | 8.18 | 5.74E-09 | 9.41E-08 | guanylyl cyclase                                            |
| TGME49_276930 | 1.54  | 7.83 | 6.00E-09 | 9.79E-08 | hypothetical protein                                        |
| TGME49_265500 | -9.38 | 6.01 | 6.04E-09 | 9.84E-08 | chloride transporter, chloride channel (ClC) family protein |
| TGME49_292920 | -1.88 | 7.96 | 6.32E-09 | 1.03E-07 | heat shock protein 75, putative                             |
| TGME49_228750 | -3.68 | 6.46 | 6.33E-09 | 1.03E-07 | TGME49_228750 CAM kinase, RAD family                        |
| TGME49_202580 | 2.05  | 6.39 | 6.53E-09 | 1.06E-07 | ATPase, AAA family protein                                  |
| TGME49_227930 | 1.43  | 7.02 | 6.53E-09 | 1.06E-07 | hypothetical protein                                        |
| TGME49_318330 | -9.40 | 5.85 | 6.62E-09 | 1.07E-07 | histone lysine acetyltransferase MYST-A                     |
| TGME49_233410 | 2.08  | 5.64 | 6.66E-09 | 1.07E-07 | Sof1 family domain-containing protein                       |
| TGME49_255700 | -2.36 | 7.07 | 6.65E-09 | 1.07E-07 | hypothetical protein                                        |
| TGME49_240870 | -2.54 | 7.10 | 6.99E-09 | 1.12E-07 | beta adaptin protein, putative                              |
| TGME49_313020 | -3.63 | 6.61 | 7.02E-09 | 1.12E-07 | STAS domain-containing protein                              |
| TGME49_218362 | -2.55 | 6.89 | 7.05E-09 | 1.12E-07 | zinc finger protein ZFP1                                    |
| TGME49_282220 | 1.53  | 6.58 | 7.18E-09 | 1.14E-07 | AP2 domain transcription factor AP2VIIa-9                   |
| TGME49_207880 | -9.56 | 6.72 | 7.36E-09 | 1.17E-07 | hypothetical protein                                        |
| TGME49_233000 | -1.97 | 7.06 | 7.39E-09 | 1.17E-07 | KOW motif domain-containing protein                         |
| TGME49_222960 | -9.40 | 5.95 | 7.59E-09 | 1.20E-07 | SCY kinase-related protein (incomplete catalytic triad)     |
| TGME49_320740 | -2.10 | 7.64 | 7.90E-09 | 1.25E-07 | hypothetical protein                                        |
| TGME49_247460 | -1.50 | 8.51 | 8.01E-09 | 1.26E-07 | proliferating cell nuclear antigen PCNA1                    |
| TGME49_267690 | -4.44 | 6.16 | 8.04E-09 | 1.26E-07 | hypothetical protein                                        |
| TGME49_203180 | -4.41 | 5.86 | 8.14E-09 | 1.27E-07 | leucine rich repeat-containing protein                      |
| TGME49_305240 | -3.22 | 6.60 | 8.22E-09 | 1.28E-07 | XPA binding protein 2 family protein                        |
| TGME49_207100 | -9.35 | 5.81 | 8.51E-09 | 1.32E-07 | hypothetical protein                                        |
| TGME49_295658 | -3.61 | 6.32 | 8.57E-09 | 1.33E-07 | zinc finger in N-recogin protein                            |
| TGME49_206610 | -3.26 | 6.76 | 8.63E-09 | 1.34E-07 | pyruvate dehydrogenase complex subunit PDH-E2               |
| TGME49_297890 | 1.72  | 6.67 | 8.70E-09 | 1.34E-07 | hypothetical protein                                        |
| TGME49_311070 | -3.69 | 6.42 | 8.69E-09 | 1.34E-07 | hypothetical protein                                        |
| TGME49_213325 | -9.41 | 5.93 | 8.77E-09 | 1.35E-07 | TBC domain-containing protein                               |
| TGME49_263730 | -2.70 | 6.40 | 9.59E-09 | 1.47E-07 | FAD-dependent glycerol-3-phosphate dehydrogenase            |
| TGME49_270620 | 2.77  | 6.19 | 9.74E-09 | 1.49E-07 | DEAD/DEAH box helicase domain-containing protein            |
| TGME49_202020 | 2.49  | 6.95 | 1.01E-08 | 1.55E-07 | DnaK-TPR                                                    |
| TGME49_294940 | 1.57  | 6.95 | 1.06E-08 | 1.62E-07 | hypothetical protein                                        |
| TGME49_270770 | -4.45 | 6.36 | 1.06E-08 | 1.62E-07 | PWI domain-containing protein                               |
| TGME49_223760 | -9.33 | 6.03 | 1.12E-08 | 1.71E-07 | hypothetical protein                                        |
| TGME49_248820 | -9.38 | 4.70 | 1.20E-08 | 1.82E-07 | hypothetical protein                                        |
| TGME49_261970 | 1.55  | 7.59 | 1.22E-08 | 1.84E-07 | hypothetical protein                                        |
| TGME49_209280 | -4.39 | 6.12 | 1.22E-08 | 1.84E-07 | hypothetical protein                                        |
| TGME49_202470 | -9.34 | 5.84 | 1.23E-08 | 1.86E-07 | rRNA metabolism protein, SBDS family protein                |
| TGME49_222930 | -2.69 | 6.77 | 1.35E-08 | 2.03E-07 | hypothetical protein                                        |
| TGME49_300048 | 1.38  | 7.17 | 1.39E-08 | 2.09E-07 | hypothetical protein                                        |
| TGME49_305090 | 1.86  | 6.45 | 1.43E-08 | 2.13E-07 | kinase binding protein cgi-121 protein                      |
| TGME49_225250 | 1.74  | 5.93 | 1.42E-08 | 2.13E-07 | LSU ribosomal protein L14P, putative                        |
| TGME49_321690 | -3.66 | 6.68 | 1.42E-08 | 2.13E-07 | hypothetical protein                                        |
| TGME49_245730 | -9.31 | 5.76 | 1.43E-08 | 2.13E-07 | phosphatidylinositol-4-phosphate 5-Kinase                   |
| TGME49_223050 | -1.25 | 9.44 | 1.49E-08 | 2.21E-07 | ribosomal protein RPS20                                     |
| TGME49_240570 | -2.74 | 6.80 | 1.51E-08 | 2.23E-07 | hypothetical protein                                        |
| TGME49_319910 | 1.73  | 5.94 | 1.53E-08 | 2.25E-07 | WD domain, G-beta repeat-containing protein                 |
| TGME49_271470 | -4.36 | 6.12 | 1.53E-08 | 2.26E-07 | hypothetical protein                                        |
| TGME49_213067 | 1.18  | 7.78 | 1.54E-08 | 2.26E-07 | hypothetical protein                                        |
| TGME49_250690 | -1.30 | 8.88 | 1.56E-08 | 2.29E-07 | zinc finger (CCCH type) motif-containing protein            |
| TGME49_293440 | -1.84 | 7.35 | 1.70E-08 | 2.49E-07 | hypothetical protein                                        |
| TGME49_244700 | -2.01 | 7.88 | 1.74E-08 | 2.53E-07 | NAD(+)/NADH kinase domain-containing protein                |
| TGME49_211470 | 2.49  | 5.17 | 1.76E-08 | 2.56E-07 | Fcf2 pre-rRNA processing protein                            |
| TGME49_310530 | -4.38 | 6.15 | 1.80E-08 | 2.62E-07 | SNF2 family N-terminal domain-containing protein            |
| TGME49_225770 | -9.28 | 5.71 | 1.90E-08 | 2.75E-07 | Tyrosine kinase-like (TKL) protein                          |



|               |       |      |          |          |                                                        |
|---------------|-------|------|----------|----------|--------------------------------------------------------|
| TGME49_218560 | -1.73 | 7.74 | 1.94E-08 | 2.80E-07 | acetyl-coA carboxylase ACC2                            |
| TGME49_293710 | -1.88 | 7.43 | 1.97E-08 | 2.84E-07 | Zn-finger in Ran binding protein and others domain-c   |
| TGME49_203560 | -9.37 | 5.94 | 2.03E-08 | 2.92E-07 | hypothetical protein                                   |
| TGME49_216020 | -9.29 | 6.06 | 2.04E-08 | 2.94E-07 | peptidase family c78 protein                           |
| TGME49_296340 | 4.60  | 5.35 | 2.11E-08 | 3.02E-07 | hypothetical protein                                   |
| TGME49_212170 | -9.28 | 5.94 | 2.11E-08 | 3.02E-07 | GIY-YIG catalytic domain-containing protein            |
| TGME49_265110 | -9.30 | 6.03 | 2.13E-08 | 3.05E-07 | ribosome biogenesis protein, putative                  |
| TGME49_311100 | 1.22  | 9.23 | 2.14E-08 | 3.06E-07 | zinc finger (CCCH type) motif-containing protein       |
| TGME49_224960 | 1.34  | 7.07 | 2.20E-08 | 3.14E-07 | hypothetical protein                                   |
| TGME49_264080 | -1.65 | 8.18 | 2.24E-08 | 3.19E-07 | acyl carrier protein ACP                               |
| TGME49_215590 | -1.78 | 8.31 | 2.26E-08 | 3.20E-07 | flavoprotein subunit of succinate dehydrogenase        |
| TGME49_306310 | -2.68 | 6.64 | 2.26E-08 | 3.20E-07 | RecF/RecN/SMC N terminal domain-containing prote       |
| TGME49_254720 | 1.02  | 9.52 | 2.28E-08 | 3.22E-07 | dense granule protein GRA8                             |
| TGME49_313380 | -1.15 | 9.56 | 2.31E-08 | 3.26E-07 | hypothetical protein                                   |
| TGME49_274060 | -1.82 | 7.69 | 2.54E-08 | 3.58E-07 | 2-oxoglutarate/malate translocase OMT                  |
| TGME49_205360 | -2.34 | 7.08 | 2.56E-08 | 3.60E-07 | hypothetical protein                                   |
| TGME49_235398 | -9.26 | 5.77 | 2.62E-08 | 3.67E-07 | hypothetical protein                                   |
| TGME49_307820 | 1.95  | 5.87 | 2.67E-08 | 3.73E-07 | hypothetical protein                                   |
| TGME49_218750 | -3.67 | 5.30 | 2.67E-08 | 3.73E-07 | hypothetical protein                                   |
| TGME49_236540 | 1.04  | 8.98 | 2.72E-08 | 3.79E-07 | RNA recognition motif-containing protein               |
| TGME49_271780 | -3.11 | 6.36 | 2.72E-08 | 3.79E-07 | Filamin/ABP280 repeat-containing protein               |
| TGME49_225580 | -9.25 | 5.94 | 2.72E-08 | 3.79E-07 | proteasome (prosome, macropain) 26S subunit, non-      |
| TGME49_251890 | -4.36 | 5.68 | 2.83E-08 | 3.93E-07 | hypothetical protein                                   |
| TGME49_267500 | 1.01  | 8.83 | 2.96E-08 | 4.10E-07 | hypothetical protein                                   |
| TGME49_292975 | -3.56 | 6.05 | 3.14E-08 | 4.34E-07 | hypothetical protein                                   |
| TGME49_290160 | -1.61 | 8.18 | 3.20E-08 | 4.41E-07 | sortilin, putative                                     |
| TGME49_242055 | -9.26 | 5.77 | 3.24E-08 | 4.46E-07 | DEAD/DEAH box helicase domain-containing protein       |
| TGME49_320440 | -2.81 | 6.19 | 3.24E-08 | 4.46E-07 | hypothetical protein                                   |
| TGME49_253930 | -2.02 | 6.95 | 3.27E-08 | 4.49E-07 | GCC2 and GCC3 domain-containing protein                |
| TGME49_315100 | 3.08  | 4.83 | 3.35E-08 | 4.59E-07 | hypothetical protein                                   |
| TGME49_232780 | -3.16 | 6.30 | 3.55E-08 | 4.86E-07 | hypothetical protein                                   |
| TGME49_216770 | -4.35 | 5.97 | 3.57E-08 | 4.87E-07 | hypothetical protein                                   |
| TGME49_229420 | -9.23 | 6.04 | 3.66E-08 | 4.98E-07 | cytochrome c, putative                                 |
| TGME49_221720 | -4.67 | 6.44 | 3.68E-08 | 4.99E-07 | hypothetical protein                                   |
| TGME49_262150 | -9.22 | 5.98 | 3.76E-08 | 5.09E-07 | kelch repeat and K+ channel tetramerisation domain     |
| TGME49_220430 | -9.22 | 5.67 | 3.86E-08 | 5.21E-07 | hypothetical protein                                   |
| TGME49_247580 | -9.25 | 5.86 | 3.91E-08 | 5.27E-07 | glutaredoxin domain-containing protein                 |
| TGME49_268880 | -3.50 | 6.09 | 3.92E-08 | 5.27E-07 | hypothetical protein                                   |
| TGME49_225480 | -4.30 | 5.99 | 3.96E-08 | 5.31E-07 | hypothetical protein                                   |
| TGME49_280730 | -9.23 | 5.83 | 3.96E-08 | 5.31E-07 | cytosolic fe-s cluster assembling factor nbp35, putati |
| TGME49_239590 | -4.32 | 6.37 | 3.99E-08 | 5.34E-07 | WD domain, G-beta repeat-containing protein            |
| TGME49_202010 | -3.08 | 6.47 | 4.03E-08 | 5.39E-07 | hypothetical protein                                   |
| TGME49_246570 | 2.11  | 5.60 | 4.06E-08 | 5.42E-07 | hypothetical protein                                   |
| TGME49_202280 | -4.40 | 5.77 | 4.08E-08 | 5.44E-07 | WD domain, G-beta repeat-containing protein            |
| TGME49_267600 | -3.08 | 6.33 | 4.12E-08 | 5.48E-07 | FHA domain-containing protein                          |
| TGME49_307770 | -2.20 | 6.60 | 4.19E-08 | 5.55E-07 | fumble protein                                         |
| TGME49_203730 | -9.21 | 5.89 | 4.18E-08 | 5.55E-07 | hypothetical protein                                   |
| TGME49_207690 | -4.30 | 6.36 | 4.26E-08 | 5.62E-07 | programmed cell death 5 protein                        |
| TGME49_254000 | 1.26  | 7.06 | 4.32E-08 | 5.70E-07 | hypothetical protein                                   |
| TGME49_309380 | -3.07 | 6.60 | 4.42E-08 | 5.81E-07 | Nuf2                                                   |
| TGME49_229470 | -4.34 | 6.35 | 4.48E-08 | 5.88E-07 | hypothetical protein                                   |
| TGME49_290900 | -9.25 | 5.86 | 4.52E-08 | 5.93E-07 | hydrolase, NUDIX family protein                        |
| TGME49_209730 | -9.22 | 5.93 | 4.58E-08 | 5.99E-07 | hypothetical protein                                   |
| TGME49_223855 | 2.76  | 6.35 | 4.60E-08 | 6.01E-07 | RNA recognition motif-containing protein               |
| TGME49_266730 | -9.20 | 5.67 | 4.64E-08 | 6.05E-07 | leucyl-tRNA synthetase (LeuRS2)                        |

|               |       |       |          |          |                                                     |
|---------------|-------|-------|----------|----------|-----------------------------------------------------|
| TGME49_211250 | -2.84 | 6.81  | 4.93E-08 | 6.39E-07 | hypothetical protein                                |
| TGME49_285260 | 2.73  | 4.95  | 5.03E-08 | 6.51E-07 | hypothetical protein                                |
| TGME49_234980 | 1.83  | 6.57  | 5.23E-08 | 6.76E-07 | hypothetical protein                                |
| TGME49_319900 | -2.15 | 7.18  | 5.48E-08 | 7.07E-07 | hypothetical protein                                |
| TGME49_244280 | -1.19 | 10.21 | 5.50E-08 | 7.07E-07 | hypothetical protein                                |
| TGME49_227952 | -2.43 | 6.97  | 5.50E-08 | 7.07E-07 | 14-3-3 superfamily protein                          |
| TGME49_249610 | -2.58 | 6.80  | 5.52E-08 | 7.09E-07 | hypothetical protein                                |
| TGME49_205200 | 1.28  | 6.83  | 5.56E-08 | 7.12E-07 | hypothetical protein                                |
| TGME49_264600 | -2.43 | 6.95  | 5.58E-08 | 7.12E-07 | hypothetical protein                                |
| TGME49_237830 | -9.23 | 5.84  | 5.57E-08 | 7.12E-07 | DNA polymerase I domain-containing protein          |
| TGME49_213790 | -3.06 | 6.32  | 5.88E-08 | 7.49E-07 | hypothetical protein                                |
| TGME49_254690 | 1.06  | 8.47  | 6.05E-08 | 7.69E-07 | phospholipase/carboxylesterase                      |
| TGME49_217770 | 1.55  | 7.05  | 6.18E-08 | 7.82E-07 | hypothetical protein                                |
| TGME49_257380 | 1.09  | 8.41  | 6.18E-08 | 7.82E-07 | hypothetical protein                                |
| TGME49_215570 | -3.51 | 6.18  | 6.19E-08 | 7.82E-07 | AP2 domain transcription factor AP2X-11             |
| TGME49_235560 | -9.20 | 5.26  | 6.32E-08 | 7.97E-07 | hypothetical protein                                |
| TGME49_246490 | -2.01 | 7.46  | 6.53E-08 | 8.21E-07 | hypothetical protein                                |
| TGME49_305980 | -2.23 | 7.06  | 6.52E-08 | 8.21E-07 | pyruvate dehydrogenase complex subunit PDH-E3I      |
| TGME49_306440 | -9.17 | 6.04  | 6.65E-08 | 8.35E-07 | hypothetical protein                                |
| TGME49_214820 | 1.64  | 6.75  | 6.75E-08 | 8.46E-07 | G-patch domain-containing protein                   |
| TGME49_258150 | -1.69 | 7.78  | 6.92E-08 | 8.66E-07 | proteasome subunit alpha type 7, putative           |
| TGME49_295080 | -9.17 | 5.79  | 7.06E-08 | 8.82E-07 | hypothetical protein                                |
| TGME49_226220 | -2.58 | 6.89  | 7.21E-08 | 8.99E-07 | alveolin domain containing intermediate filament IM |
| TGME49_226430 | -1.36 | 8.72  | 7.36E-08 | 9.16E-07 | reticulon protein                                   |
| TGME49_239780 | -3.53 | 6.36  | 7.43E-08 | 9.23E-07 | hypothetical protein                                |
| TGME49_243930 | 1.31  | 8.92  | 7.74E-08 | 9.59E-07 | hypothetical protein                                |
| TGME49_226960 | -1.13 | 9.46  | 7.74E-08 | 9.59E-07 | phosphofructokinase PFKII                           |
| TGME49_315600 | -9.28 | 5.50  | 7.83E-08 | 9.68E-07 | MCM2/3/5 family protein                             |
| TGME49_310910 | -9.25 | 5.61  | 8.02E-08 | 9.91E-07 | WD domain, G-beta repeat-containing protein         |
| TGME49_294970 | 1.33  | 8.63  | 8.27E-08 | 1.02E-06 | hypothetical protein                                |
| TGME49_201150 | -2.17 | 6.72  | 8.44E-08 | 1.04E-06 | heavy metal translocating P-type ATPase subfamily p |
| TGME49_245560 | 1.10  | 7.95  | 8.62E-08 | 1.06E-06 | hypothetical protein                                |
| TGME49_212140 | -4.43 | 6.11  | 9.04E-08 | 1.11E-06 | hypothetical protein                                |
| TGME49_211630 | 1.20  | 8.47  | 9.20E-08 | 1.12E-06 | hypothetical protein                                |
| TGME49_264090 | -3.49 | 6.14  | 9.19E-08 | 1.12E-06 | hypothetical protein                                |
| TGME49_293900 | 1.09  | 8.11  | 9.25E-08 | 1.13E-06 | sporozoite protein with an altered thrombospondin r |
| TGME49_282150 | -9.14 | 5.86  | 9.28E-08 | 1.13E-06 | hypothetical protein                                |
| TGME49_223800 | -4.26 | 5.96  | 9.32E-08 | 1.13E-06 | hypothetical protein                                |
| TGME49_259200 | -4.23 | 6.05  | 9.58E-08 | 1.16E-06 | Na <sup>+</sup> /H <sup>+</sup> exchanger NHE1      |
| TGME49_204310 | -1.36 | 8.50  | 9.98E-08 | 1.21E-06 | hypothetical protein                                |
| TGME49_288820 | 1.34  | 6.83  | 1.01E-07 | 1.22E-06 | hypothetical protein                                |
| TGME49_260620 | 1.87  | 8.06  | 1.08E-07 | 1.31E-06 | hypothetical protein                                |
| TGME49_310230 | -9.18 | 5.63  | 1.09E-07 | 1.32E-06 | hypothetical protein                                |
| TGME49_318650 | 1.15  | 8.31  | 1.10E-07 | 1.32E-06 | transhydrogenase                                    |
| TGME49_312622 | -2.27 | 7.05  | 1.11E-07 | 1.33E-06 | DUF803 domain-containing protein                    |
| TGME49_231130 | -9.12 | 5.70  | 1.11E-07 | 1.33E-06 | hypothetical protein                                |
| TGME49_251170 | 2.39  | 6.41  | 1.13E-07 | 1.35E-06 | KRUF family protein                                 |
| TGME49_282040 | -4.28 | 5.99  | 1.13E-07 | 1.35E-06 | hypothetical protein                                |
| TGME49_278630 | -9.11 | 5.70  | 1.20E-07 | 1.43E-06 | tetratricopeptide repeat-containing protein         |
| TGME49_234440 | -4.26 | 5.42  | 1.22E-07 | 1.45E-06 | aminotransferase, putative                          |
| TGME49_278720 | -9.16 | 5.75  | 1.26E-07 | 1.50E-06 | hypothetical protein                                |
| TGME49_219700 | -1.55 | 8.41  | 1.27E-07 | 1.51E-06 | DNA replication licensing factor MCM4, putative     |
| TGME49_288010 | 3.19  | 5.10  | 1.28E-07 | 1.51E-06 | hypothetical protein                                |
| TGME49_280800 | -1.86 | 7.39  | 1.29E-07 | 1.52E-06 | SWI2/SNF2 SRCAP/Ino80                               |
| TGME49_201400 | -4.23 | 6.24  | 1.30E-07 | 1.53E-06 | Sin3-associated polypeptide SAP18                   |

|               |       |      |          |          |                                                          |
|---------------|-------|------|----------|----------|----------------------------------------------------------|
| TGME49_227420 | -9.15 | 5.89 | 1.30E-07 | 1.54E-06 | 4-hydroxy-3-methylbut-2-enyl diphosphate reductase       |
| TGME49_239720 | -9.11 | 5.49 | 1.34E-07 | 1.57E-06 | 50S ribosomal protein l24, putative                      |
| TGME49_239890 | 1.15  | 7.77 | 1.41E-07 | 1.65E-06 | SCP family extracellular subfamily protein               |
| TGME49_209130 | -9.11 | 5.70 | 1.41E-07 | 1.66E-06 | regulator of chromosome condensation (RCC1) repeat       |
| TGME49_209930 | -9.20 | 5.30 | 1.42E-07 | 1.66E-06 | hypothetical protein                                     |
| TGME49_230950 | -9.15 | 5.62 | 1.43E-07 | 1.67E-06 | hypothetical protein                                     |
| TGME49_313445 | 1.67  | 5.72 | 1.45E-07 | 1.69E-06 | hypothetical protein                                     |
| TGME49_205340 | 1.26  | 9.84 | 1.47E-07 | 1.71E-06 | ribosomal protein RPS12                                  |
| TGME49_253360 | 1.32  | 7.00 | 1.49E-07 | 1.73E-06 | hypothetical protein                                     |
| TGME49_204280 | 1.27  | 7.67 | 1.54E-07 | 1.78E-06 | cell-cycle-associated protein kinase DYRK, putative      |
| TGME49_231980 | -9.12 | 5.84 | 1.54E-07 | 1.78E-06 | hypothetical protein                                     |
| TGME49_254870 | 1.24  | 6.87 | 1.57E-07 | 1.81E-06 | hypothetical protein                                     |
| TGME49_216070 | -9.09 | 5.74 | 1.57E-07 | 1.81E-06 | hypothetical protein                                     |
| TGME49_232270 | -9.16 | 5.79 | 1.58E-07 | 1.81E-06 | histidine acid phosphatase superfamily protein           |
| TGME49_249530 | -1.59 | 7.70 | 1.61E-07 | 1.85E-06 | exportin 1, putative                                     |
| TGME49_278975 | -2.23 | 6.87 | 1.68E-07 | 1.92E-06 | ICE family protease (caspase) p20 domain-containing      |
| TGME49_293730 | -1.95 | 7.07 | 1.74E-07 | 1.99E-06 | DHHC zinc finger domain-containing protein               |
| TGME49_217410 | -9.14 | 4.73 | 1.75E-07 | 2.00E-06 | hypothetical protein                                     |
| TGME49_297780 | -2.98 | 6.07 | 1.76E-07 | 2.01E-06 | ATPase/histidine kinase/DNA gyrase B/HSP90 domain        |
| TGME49_269930 | -1.97 | 6.51 | 1.79E-07 | 2.04E-06 | calcium binding egf domain-containing protein            |
| TGME49_212100 | -9.12 | 4.92 | 1.79E-07 | 2.04E-06 | ThiF family protein                                      |
| TGME49_258480 | -2.15 | 6.81 | 1.81E-07 | 2.05E-06 | hypothetical protein                                     |
| TGME49_249650 | -9.09 | 5.91 | 1.81E-07 | 2.06E-06 | apolipoprotein A-I binding protein, putative             |
| TGME49_243580 | -2.99 | 7.20 | 1.84E-07 | 2.08E-06 | Hit family protein involved in cell-cycle regulation, pu |
| TGME49_310010 | -1.42 | 8.26 | 1.84E-07 | 2.08E-06 | rhoptry neck protein RON1                                |
| TGME49_289730 | -2.12 | 7.06 | 1.85E-07 | 2.09E-06 | Pep3/Vps18/deep orange family protein                    |
| TGME49_297840 | -2.00 | 7.20 | 1.86E-07 | 2.09E-06 | DNA primase, large subunit                               |
| TGME49_286270 | -2.25 | 6.58 | 1.85E-07 | 2.09E-06 | hypothetical protein                                     |
| TGME49_227650 | -2.52 | 6.80 | 1.86E-07 | 2.09E-06 | microtubule-associated protein RP/EB family, putativ     |
| TGME49_203760 | 1.63  | 6.32 | 1.90E-07 | 2.13E-06 | hypothetical protein                                     |
| TGME49_205280 | 1.20  | 7.65 | 1.92E-07 | 2.15E-06 | hypothetical protein                                     |
| TGME49_249360 | -2.22 | 6.90 | 1.94E-07 | 2.17E-06 | RED family protein                                       |
| TGME49_309220 | -1.77 | 7.36 | 2.15E-07 | 2.40E-06 | GTPase activating protein for Arf protein                |
| TGME49_285870 | 1.51  | 9.32 | 2.18E-07 | 2.42E-06 | SAG-related sequence SRS20A                              |
| TGME49_205540 | -9.08 | 5.64 | 2.18E-07 | 2.42E-06 | DEAD/DEAH box helicase domain-containing protein         |
| TGME49_211410 | -4.13 | 5.74 | 2.24E-07 | 2.49E-06 | translation initiation factor sui1 protein               |
| TGME49_225690 | -1.43 | 8.01 | 2.27E-07 | 2.51E-06 | hypothetical protein                                     |
| TGME49_260670 | -9.06 | 5.92 | 2.27E-07 | 2.51E-06 | centrin, putative                                        |
| TGME49_264840 | -9.06 | 5.33 | 2.31E-07 | 2.55E-06 | ATP-dependent DNA helicase, RecQ family protein          |
| TGME49_221440 | -9.14 | 5.45 | 2.32E-07 | 2.56E-06 | RPGR, putative                                           |
| TGME49_252070 | 2.10  | 5.12 | 2.38E-07 | 2.62E-06 | KRUF family protein                                      |
| TGME49_312300 | -1.75 | 7.41 | 2.39E-07 | 2.63E-06 | Sec7 domain-containing protein                           |
| TGME49_264780 | -9.08 | 5.52 | 2.40E-07 | 2.64E-06 | UTP-glucose-1-phosphate uridylyltransferase subfam       |
| TGME49_227060 | -9.07 | 5.72 | 2.44E-07 | 2.68E-06 | hypothetical protein                                     |
| TGME49_262930 | -9.04 | 5.80 | 2.52E-07 | 2.76E-06 | hypothetical protein                                     |
| TGME49_311870 | -2.50 | 6.63 | 2.53E-07 | 2.77E-06 | WD domain, G-beta repeat-containing protein              |
| TGME49_286790 | -4.13 | 6.16 | 2.59E-07 | 2.83E-06 | nuclear factor NF2                                       |
| TGME49_218880 | -2.02 | 7.48 | 2.67E-07 | 2.91E-06 | SF-assemblin, putative                                   |
| TGME49_226580 | 1.19  | 7.99 | 2.68E-07 | 2.91E-06 | hypothetical protein                                     |
| TGME49_294270 | -9.02 | 5.61 | 2.68E-07 | 2.91E-06 | histone arginine methyltransferase PRMT4/CARM1           |
| TGME49_270670 | 2.08  | 5.21 | 2.70E-07 | 2.93E-06 | hypothetical protein                                     |
| TGME49_278850 | -1.38 | 7.92 | 2.74E-07 | 2.96E-06 | DHHC zinc finger domain-containing protein               |
| TGME49_228190 | -1.56 | 7.95 | 2.79E-07 | 3.01E-06 | eukaryotic initiation factor-3, subunit 5, putative      |
| TGME49_285970 | -9.02 | 5.58 | 2.88E-07 | 3.10E-06 | 30S ribosomal protein S5, putative                       |
| TGME49_301380 | -4.18 | 6.01 | 2.88E-07 | 3.11E-06 | elongation factor Tu GTP binding domain-containing       |

|               |       |      |          |          |                                                      |
|---------------|-------|------|----------|----------|------------------------------------------------------|
| TGME49_209210 | -2.20 | 6.84 | 2.90E-07 | 3.12E-06 | hypothetical protein                                 |
| TGME49_281910 | 1.57  | 6.18 | 2.94E-07 | 3.16E-06 | hypothetical protein                                 |
| TGME49_309870 | -9.03 | 5.78 | 2.98E-07 | 3.19E-06 | hypothetical protein                                 |
| TGME49_306600 | -9.05 | 5.73 | 2.98E-07 | 3.19E-06 | RNA recognition motif-containing protein             |
| TGME49_311680 | -1.73 | 7.31 | 3.00E-07 | 3.21E-06 | FUN14 family protein                                 |
| TGME49_247760 | -2.70 | 6.83 | 3.08E-07 | 3.29E-06 | AMP-binding enzyme domain-containing protein         |
| TGME49_292235 | -9.04 | 5.58 | 3.10E-07 | 3.31E-06 | hypothetical protein                                 |
| TGME49_314920 | 2.19  | 5.56 | 3.12E-07 | 3.32E-06 | hypothetical protein                                 |
| TGME49_281510 | -3.35 | 6.07 | 3.15E-07 | 3.35E-06 | ribonuclease H1 large subunit, putative              |
| TGME49_238950 | -1.75 | 9.10 | 3.17E-07 | 3.37E-06 | fatty acyl-CoA desaturase, putative                  |
| TGME49_248530 | -9.02 | 5.80 | 3.21E-07 | 3.40E-06 | FATC domain-containing protein                       |
| TGME49_253020 | -2.98 | 6.02 | 3.28E-07 | 3.48E-06 | hypothetical protein                                 |
| TGME49_260320 | -2.93 | 6.27 | 3.36E-07 | 3.56E-06 | Noc2p family protein                                 |
| TGME49_238100 | -2.04 | 7.30 | 3.47E-07 | 3.66E-06 | transmembrane protein                                |
| TGME49_286650 | -9.00 | 5.60 | 3.49E-07 | 3.68E-06 | hypothetical protein                                 |
| TGME49_285490 | -9.04 | 5.57 | 3.53E-07 | 3.72E-06 | helix-hairpin-helix motif domain-containing protein  |
| TGME49_318750 | 1.70  | 5.79 | 3.54E-07 | 3.73E-06 | deoxyribose-phosphate aldolase                       |
| TGME49_297800 | -2.72 | 6.62 | 3.59E-07 | 3.78E-06 | RecF/RecN/SMC N terminal domain-containing prote     |
| TGME49_240800 | -2.11 | 6.86 | 3.69E-07 | 3.87E-06 | MORN repeat-containing protein                       |
| TGME49_290980 | -2.49 | 6.72 | 3.71E-07 | 3.89E-06 | glycine C-acetyltransferase, putative                |
| TGME49_310460 | -2.51 | 7.01 | 3.86E-07 | 4.03E-06 | Rab6                                                 |
| TGME49_237000 | -4.10 | 5.99 | 3.87E-07 | 4.04E-06 | polyphosphoinositide binding protein, putative       |
| TGME49_296015 | 1.78  | 6.18 | 3.88E-07 | 4.04E-06 | hypothetical protein                                 |
| TGME49_209940 | -2.39 | 6.24 | 3.89E-07 | 4.04E-06 | transporter/permease protein                         |
| TGME49_314540 | -8.99 | 5.67 | 3.91E-07 | 4.06E-06 | hypothetical protein                                 |
| TGME49_297900 | 1.69  | 7.58 | 3.93E-07 | 4.07E-06 | hypothetical protein                                 |
| TGME49_249590 | -1.64 | 7.72 | 3.95E-07 | 4.10E-06 | proteasome subunit alpha type 5-2, putative          |
| TGME49_273030 | -3.34 | 5.76 | 3.99E-07 | 4.13E-06 | phosphoglycerate mutase family protein               |
| TGME49_312430 | 1.71  | 6.02 | 4.18E-07 | 4.31E-06 | hypothetical protein                                 |
| TGME49_208500 | -2.69 | 6.45 | 4.18E-07 | 4.31E-06 | protein phosphatase 2C domain-containing protein     |
| TGME49_311390 | 2.33  | 5.11 | 4.26E-07 | 4.39E-06 | tRNA (guanine(9)-N(1))-methyltransferase             |
| TGME49_274010 | -4.10 | 6.06 | 4.29E-07 | 4.41E-06 | hypothetical protein                                 |
| TGME49_221580 | -1.57 | 7.41 | 4.36E-07 | 4.48E-06 | ribosomal RNA large subunit methyltransferase J pro  |
| TGME49_306520 | 1.87  | 7.15 | 4.38E-07 | 4.49E-06 | tRNA pseudouridine synthase B, putative              |
| TGME49_246460 | -4.13 | 5.93 | 4.44E-07 | 4.54E-06 | hypothetical protein                                 |
| TGME49_240520 | -9.00 | 5.59 | 4.44E-07 | 4.54E-06 | hypothetical protein                                 |
| TGME49_205380 | -1.55 | 7.80 | 4.48E-07 | 4.57E-06 | fructose-bisphosphatase I                            |
| TGME49_271760 | -8.98 | 5.72 | 4.57E-07 | 4.66E-06 | seryl-tRNA synthetase (SerRS2)                       |
| TGME49_222710 | -2.47 | 6.78 | 4.63E-07 | 4.72E-06 | IMP-specific 5'-nucleotidase 1, putative             |
| TGME49_205040 | -1.55 | 7.70 | 4.69E-07 | 4.77E-06 | PGAP1 family protein                                 |
| TGME49_270550 | -9.05 | 5.78 | 4.78E-07 | 4.86E-06 | gamma-glutamyl phosphate reductase, putative         |
| TGME49_280500 | -4.11 | 4.70 | 4.83E-07 | 4.90E-06 | inorganic anion transporter, sulfate permease (SulP) |
| TGME49_217688 | -8.98 | 5.67 | 4.84E-07 | 4.90E-06 | hypothetical protein                                 |
| TGME49_262950 | 1.23  | 7.72 | 4.87E-07 | 4.93E-06 | hypothetical protein                                 |
| TGME49_283790 | -1.79 | 7.20 | 4.89E-07 | 4.94E-06 | protein kinase, putative                             |
| TGME49_221295 | -4.08 | 5.92 | 4.90E-07 | 4.94E-06 | hypothetical protein                                 |
| TGME49_310140 | -8.97 | 5.76 | 5.03E-07 | 5.07E-06 | hypothetical protein                                 |
| TGME49_289300 | -1.85 | 7.33 | 5.09E-07 | 5.12E-06 | methionyl-tRNA synthetase                            |
| TGME49_270800 | -4.18 | 6.03 | 5.50E-07 | 5.52E-06 | GAF domain-containing protein                        |
| TGME49_266400 | -9.03 | 5.57 | 5.57E-07 | 5.58E-06 | hypothetical protein                                 |
| TGME49_249740 | 1.72  | 6.54 | 5.85E-07 | 5.85E-06 | translation machinery associated tma7 protein        |
| TGME49_292140 | 1.16  | 7.59 | 5.94E-07 | 5.93E-06 | NIMA-related protein kinase NIMA1                    |
| TGME49_316200 | 1.42  | 6.43 | 5.97E-07 | 5.95E-06 | phosphoglycerate mutase family protein               |
| TGME49_249470 | -8.94 | 5.77 | 6.00E-07 | 5.97E-06 | rhoptyr kinase family protein, truncated (incomplete |
| TGME49_209985 | -2.18 | 6.45 | 6.04E-07 | 6.00E-06 | cAMP-dependent protein kinase                        |

|               |       |       |          |          |                                                     |
|---------------|-------|-------|----------|----------|-----------------------------------------------------|
| TGME49_265010 | -8.94 | 5.64  | 6.06E-07 | 6.01E-06 | glutamate 5-kinase domain-containing protein        |
| TGME49_251440 | -9.06 | 5.79  | 6.07E-07 | 6.01E-06 | troponin c, isotype gamma, putative                 |
| TGME49_221630 | -3.28 | 5.92  | 6.09E-07 | 6.03E-06 | hypothetical protein                                |
| TGME49_201780 | 1.32  | 10.53 | 6.10E-07 | 6.03E-06 | microneme protein MIC2                              |
| TGME49_249840 | -8.94 | 5.34  | 6.28E-07 | 6.20E-06 | dynein heavy chain 2, putative                      |
| TGME49_214100 | 1.37  | 7.24  | 6.42E-07 | 6.33E-06 | hypothetical protein                                |
| TGME49_223450 | -1.97 | 6.86  | 6.43E-07 | 6.33E-06 | ubiquitin carboxyl-terminal hydrolase               |
| TGME49_224020 | 1.50  | 6.33  | 6.49E-07 | 6.38E-06 | hypothetical protein                                |
| TGME49_206600 | -8.94 | 5.40  | 6.49E-07 | 6.38E-06 | sigma-70, region 3 protein                          |
| TGME49_269290 | -2.87 | 6.26  | 6.51E-07 | 6.38E-06 | hypothetical protein                                |
| TGME49_206480 | 1.40  | 7.77  | 6.54E-07 | 6.40E-06 | hypothetical protein                                |
| TGME49_269450 | 1.94  | 5.12  | 6.67E-07 | 6.52E-06 | hypothetical protein                                |
| TGME49_304700 | -4.04 | 5.84  | 6.71E-07 | 6.55E-06 | hypothetical protein                                |
| TGME49_315860 | -2.27 | 6.65  | 6.76E-07 | 6.59E-06 | EF hand domain-containing protein                   |
| TGME49_323310 | 2.03  | 5.74  | 6.84E-07 | 6.66E-06 | hypothetical protein                                |
| TGME49_203350 | -9.01 | 5.69  | 6.96E-07 | 6.77E-06 | hypothetical protein                                |
| TGME49_206695 | 2.04  | 5.29  | 6.97E-07 | 6.77E-06 | hypothetical protein                                |
| TGME49_293760 | 1.11  | 8.17  | 7.16E-07 | 6.93E-06 | EF hand domain-containing protein                   |
| TGME49_237530 | -8.94 | 5.45  | 7.16E-07 | 6.93E-06 | hypothetical protein                                |
| TGME49_298070 | -9.23 | 5.01  | 7.16E-07 | 6.93E-06 | hypothetical protein                                |
| TGME49_274110 | -8.93 | 5.68  | 7.26E-07 | 7.02E-06 | glycoprotease family protein                        |
| TGME49_247220 | 1.11  | 8.50  | 7.38E-07 | 7.11E-06 | nudix -type motif 9 isoform a family protein        |
| TGME49_231480 | -1.68 | 7.27  | 7.54E-07 | 7.26E-06 | GCN1, putative                                      |
| TGME49_250220 | 2.42  | 5.45  | 7.61E-07 | 7.32E-06 | hypothetical protein                                |
| TGME49_205000 | -8.94 | 5.59  | 7.63E-07 | 7.32E-06 | phosphoglycerate mutase family protein              |
| TGME49_243298 | -8.97 | 5.50  | 7.63E-07 | 7.32E-06 | ICE family protease (caspase) p20 domain-containing |
| TGME49_288360 | -1.31 | 10.08 | 7.68E-07 | 7.34E-06 | tryptophanyl-tRNA synthetase (TrpRS2)               |
| TGME49_202572 | -8.93 | 5.64  | 7.68E-07 | 7.34E-06 | ribophorin i protein                                |
| TGME49_207480 | -2.40 | 6.41  | 7.69E-07 | 7.35E-06 | GCC2 and GCC3 domain-containing protein             |
| TGME49_293860 | -8.93 | 5.58  | 7.71E-07 | 7.36E-06 | hypothetical protein                                |
| TGME49_204420 | 3.11  | 6.08  | 7.78E-07 | 7.41E-06 | oocyst wall protein OWP1                            |
| TGME49_288340 | -8.91 | 5.69  | 7.85E-07 | 7.47E-06 | UBX domain-containing protein                       |
| TGME49_220870 | 1.88  | 5.64  | 8.16E-07 | 7.76E-06 | hypothetical protein                                |
| TGME49_291680 | -1.47 | 7.77  | 8.20E-07 | 7.78E-06 | Sec23/Sec24 trunk domain-containing protein         |
| TGME49_275330 | -4.05 | 5.64  | 8.25E-07 | 7.82E-06 | ribosomal protein RPL29                             |
| TGME49_319312 | 2.19  | 5.71  | 8.39E-07 | 7.91E-06 | hypothetical protein                                |
| TGME49_254230 | 1.91  | 5.65  | 8.40E-07 | 7.91E-06 | hypothetical protein                                |
| TGME49_269010 | 1.25  | 9.54  | 8.40E-07 | 7.91E-06 | AP2 domain transcription factor AP2VIII-7           |
| TGME49_313880 | -8.94 | 5.91  | 8.39E-07 | 7.91E-06 | nuclear protein-like family protein                 |
| TGME49_259090 | 1.29  | 6.78  | 8.42E-07 | 7.91E-06 | ubiquitin-conjugating enzyme subfamily protein      |
| TGME49_241890 | -8.91 | 5.67  | 8.42E-07 | 7.91E-06 | hypothetical protein                                |
| TGME49_256880 | -8.93 | 5.54  | 8.45E-07 | 7.93E-06 | protein kinase domain-containing protein            |
| TGME49_306460 | -8.92 | 5.67  | 8.62E-07 | 8.06E-06 | bromodomain-containing protein                      |
| TGME49_251840 | 1.40  | 6.35  | 9.01E-07 | 8.41E-06 | hypothetical protein                                |
| TGME49_213060 | 1.34  | 6.59  | 9.01E-07 | 8.41E-06 | WD domain, G-beta repeat-containing protein         |
| TGME49_244230 | -8.91 | 5.32  | 9.02E-07 | 8.41E-06 | hypothetical protein                                |
| TGME49_252500 | 1.20  | 7.74  | 9.22E-07 | 8.57E-06 | polo kinase                                         |
| TGME49_239700 | -3.30 | 5.88  | 9.28E-07 | 8.62E-06 | regulator of chromosome condensation (RCC1) repea   |
| TGME49_247380 | -8.91 | 5.36  | 9.47E-07 | 8.78E-06 | hypothetical protein                                |
| TGME49_208970 | -1.94 | 6.92  | 9.52E-07 | 8.82E-06 | RNA recognition motif-containing protein            |
| TGME49_299210 | 1.03  | 8.29  | 9.55E-07 | 8.83E-06 | CTP synthase                                        |
| TGME49_229370 | -4.00 | 5.92  | 9.63E-07 | 8.90E-06 | AP2 domain transcription factor AP2VIII-1           |
| TGME49_319640 | 1.11  | 8.46  | 9.77E-07 | 9.02E-06 | hypothetical protein                                |
| TGME49_316250 | 2.06  | 8.50  | 9.83E-07 | 9.05E-06 | hypothetical protein                                |
| TGME49_264130 | 1.68  | 5.62  | 1.00E-06 | 9.22E-06 | hypothetical protein                                |

|               |       |       |          |          |                                                           |
|---------------|-------|-------|----------|----------|-----------------------------------------------------------|
| TGME49_278950 | 1.84  | 5.34  | 1.01E-06 | 9.23E-06 | LSM domain-containing protein                             |
| TGME49_214580 | -4.05 | 5.36  | 1.03E-06 | 9.38E-06 | tetratricopeptide repeat-containing protein               |
| TGME49_248860 | 1.77  | 5.75  | 1.04E-06 | 9.50E-06 | hypothetical protein                                      |
| TGME49_307570 | -1.29 | 7.41  | 1.04E-06 | 9.50E-06 | glycerol-3-phosphate dehydrogenase (gpdh), putative       |
| TGME49_279430 | -2.90 | 6.25  | 1.04E-06 | 9.50E-06 | cwf18 pre-mRNA splicing factor protein                    |
| TGME49_213400 | -2.62 | 6.41  | 1.05E-06 | 9.51E-06 | zinc finger (CCCH type) motif-containing protein          |
| TGME49_269670 | -3.25 | 5.91  | 1.05E-06 | 9.51E-06 | hypothetical protein                                      |
| TGME49_215420 | -8.88 | 5.72  | 1.05E-06 | 9.51E-06 | SNARE protein                                             |
| TGME49_260580 | -2.25 | 6.60  | 1.06E-06 | 9.57E-06 | hypothetical protein                                      |
| TGME49_268960 | -3.24 | 6.09  | 1.06E-06 | 9.58E-06 | 5'-AMP-activated protein kinase subunit beta-1 family     |
| TGME49_248490 | 1.75  | 6.17  | 1.06E-06 | 9.58E-06 | hypothetical protein                                      |
| TGME49_249560 | -8.94 | 5.35  | 1.06E-06 | 9.58E-06 | DNA-directed RNA polymerase alpha chain rpoA              |
| TGME49_271060 | -4.00 | 5.87  | 1.07E-06 | 9.63E-06 | Sec1 family protein                                       |
| TGME49_222860 | -1.30 | 8.81  | 1.09E-06 | 9.85E-06 | eukaryotic translation initiation factor, putative        |
| TGME49_289750 | -1.04 | 9.50  | 1.11E-06 | 9.98E-06 | ribosomal-ubiquitin protein RPL40                         |
| TGME49_311500 | -8.99 | 5.49  | 1.17E-06 | 1.05E-05 | ThiF family protein                                       |
| TGME49_249250 | 1.13  | 10.07 | 1.17E-06 | 1.05E-05 | ribosomal protein RPL35A                                  |
| TGME49_260390 | -8.88 | 5.56  | 1.18E-06 | 1.06E-05 | hypothetical protein                                      |
| TGME49_297510 | -8.90 | 5.32  | 1.18E-06 | 1.06E-05 | hypothetical protein                                      |
| TGME49_278440 | -2.00 | 6.87  | 1.19E-06 | 1.06E-05 | SWI2/SNF2 Brahma-like putative                            |
| TGME49_259020 | 5.30  | 5.55  | 1.21E-06 | 1.08E-05 | bradyzoite antigen BAG1                                   |
| TGME49_234950 | 2.07  | 6.24  | 1.22E-06 | 1.09E-05 | protein kinase (incomplete catalytic triad)               |
| TGME49_263000 | 1.31  | 7.22  | 1.22E-06 | 1.09E-05 | Beige/BEACH domain-containing protein                     |
| TGME49_215430 | 1.89  | 7.91  | 1.24E-06 | 1.10E-05 | hypothetical protein                                      |
| TGME49_257050 | -8.85 | 5.79  | 1.24E-06 | 1.10E-05 | 3-methyl-2-oxobutanoate hydroxymethyltransferase          |
| TGME49_223010 | -2.84 | 6.45  | 1.28E-06 | 1.13E-05 | hypothetical protein                                      |
| TGME49_297400 | 1.14  | 7.21  | 1.28E-06 | 1.14E-05 | hypothetical protein                                      |
| TGME49_311250 | -3.38 | 6.06  | 1.28E-06 | 1.14E-05 | hypothetical protein                                      |
| TGME49_235020 | -1.55 | 7.85  | 1.29E-06 | 1.14E-05 | COPI protein, putative                                    |
| TGME49_255160 | -8.88 | 5.35  | 1.30E-06 | 1.15E-05 | hypothetical protein                                      |
| TGME49_299200 | 1.45  | 7.09  | 1.30E-06 | 1.15E-05 | Bet3 transport protein, putative                          |
| TGME49_245485 | 2.07  | 6.56  | 1.31E-06 | 1.16E-05 | microneme protein MIC9                                    |
| TGME49_248370 | 1.74  | 5.93  | 1.33E-06 | 1.17E-05 | prefoldin subunit 6, putative                             |
| TGME49_289050 | 1.02  | 8.43  | 1.36E-06 | 1.20E-05 | FIKK kinase, putative                                     |
| TGME49_253640 | 1.24  | 6.73  | 1.38E-06 | 1.21E-05 | hypothetical protein                                      |
| TGME49_253000 | 1.21  | 6.99  | 1.39E-06 | 1.22E-05 | ELMO/CED-12 family protein                                |
| TGME49_269660 | -2.22 | 6.75  | 1.40E-06 | 1.22E-05 | TFIIH basal transcription factor complex helicase XPB     |
| TGME49_318690 | 2.02  | 5.00  | 1.43E-06 | 1.25E-05 | RNA recognition motif-containing protein                  |
| TGME49_281400 | -2.67 | 6.55  | 1.43E-06 | 1.25E-05 | phosphofructokinase domain-containing protein             |
| TGME49_265220 | -4.04 | 5.88  | 1.43E-06 | 1.25E-05 | co-chaperone GrpE protein                                 |
| TGME49_318210 | -8.87 | 5.53  | 1.46E-06 | 1.27E-05 | hypothetical protein                                      |
| TGME49_225800 | -3.24 | 6.11  | 1.50E-06 | 1.30E-05 | iron-sulfur assembly ATPase                               |
| TGME49_224310 | -8.90 | 5.58  | 1.51E-06 | 1.31E-05 | DHHC zinc finger domain-containing protein                |
| TGME49_244000 | -8.89 | 5.35  | 1.55E-06 | 1.34E-05 | DEAD/DEAH box helicase domain-containing protein          |
| TGME49_291050 | -1.74 | 7.12  | 1.56E-06 | 1.35E-05 | histone kinase SNF1, putative                             |
| TGME49_246970 | -8.84 | 5.55  | 1.56E-06 | 1.35E-05 | 3'-5' exonuclease domain-containing protein               |
| TGME49_320490 | 1.62  | 8.78  | 1.58E-06 | 1.36E-05 | N-acyl-phosphatidylethanolamine-hydrolyzing phospholipase |
| TGME49_209700 | -3.97 | 5.90  | 1.59E-06 | 1.36E-05 | hypothetical protein                                      |
| TGME49_297420 | -4.00 | 5.82  | 1.58E-06 | 1.36E-05 | beta-tubulin cofactor D, putative                         |
| TGME49_286750 | -1.50 | 7.53  | 1.60E-06 | 1.37E-05 | MA3 domain-containing protein                             |
| TGME49_221600 | -8.86 | 5.26  | 1.60E-06 | 1.37E-05 | hypothetical protein                                      |
| TGME49_310802 | 1.67  | 5.93  | 1.62E-06 | 1.39E-05 | CRAL/TRIO domain-containing protein                       |
| TGME49_313330 | -9.05 | 5.76  | 1.63E-06 | 1.39E-05 | rhophtry kinase family protein ROP27                      |
| TGME49_266450 | 1.31  | 6.38  | 1.67E-06 | 1.43E-05 | lysine decarboxylase family protein                       |
| TGME49_215040 | -2.23 | 6.64  | 1.68E-06 | 1.43E-05 | HEAT repeat-containing protein                            |

|               |       |       |          |          |                                                        |
|---------------|-------|-------|----------|----------|--------------------------------------------------------|
| TGME49_210980 | 1.58  | 6.94  | 1.69E-06 | 1.44E-05 | alternative splicing type 3 and, putative              |
| TGME49_216510 | -3.95 | 5.85  | 1.71E-06 | 1.46E-05 | thioredoxin, putative                                  |
| TGME49_306410 | -3.96 | 5.79  | 1.75E-06 | 1.49E-05 | hypothetical protein                                   |
| TGME49_214750 | 1.14  | 7.32  | 1.77E-06 | 1.50E-05 | hypothetical protein                                   |
| TGME49_239270 | -1.73 | 7.56  | 1.77E-06 | 1.50E-05 | hypothetical protein                                   |
| TGME49_311110 | -3.95 | 5.89  | 1.79E-06 | 1.51E-05 | Ubiquitin-fold modifier 1 precursor family protein, pu |
| TGME49_297870 | -2.13 | 6.90  | 1.80E-06 | 1.52E-05 | hypothetical protein                                   |
| TGME49_316300 | -8.83 | 5.17  | 1.85E-06 | 1.56E-05 | ATP-dependent DNA helicase, RecQ family protein        |
| TGME49_266470 | -8.81 | 5.57  | 1.85E-06 | 1.56E-05 | hypothetical protein                                   |
| TGME49_310270 | -4.08 | 5.89  | 1.88E-06 | 1.58E-05 | hypothetical protein                                   |
| TGME49_301160 | -4.31 | 5.24  | 1.88E-06 | 1.58E-05 | SAG-related sequence SRS19C                            |
| TGME49_234490 | -2.81 | 6.15  | 1.94E-06 | 1.63E-05 | kelch repeat-containing protein                        |
| TGME49_268210 | -9.53 | 5.75  | 1.94E-06 | 1.63E-05 | AGC kinase                                             |
| TGME49_280370 | 1.17  | 9.15  | 1.98E-06 | 1.66E-05 | hypothetical protein                                   |
| TGME49_240370 | 8.07  | 4.77  | 1.99E-06 | 1.66E-05 | Toxoplasma gondii family E protein                     |
| TGME49_314730 | -3.97 | 5.86  | 2.00E-06 | 1.67E-05 | ALG6, ALG8 glycosyltransferase family protein          |
| TGME49_219810 | 1.50  | 8.82  | 2.02E-06 | 1.68E-05 | hypothetical protein                                   |
| TGME49_232560 | -2.22 | 6.98  | 2.04E-06 | 1.70E-05 | hypothetical protein                                   |
| TGME49_313830 | -2.78 | 6.34  | 2.08E-06 | 1.73E-05 | AARP2CN (NUC121) domain-containing protein             |
| TGME49_227600 | -1.49 | 9.30  | 2.12E-06 | 1.75E-05 | ribosomal protein RPL34                                |
| TGME49_216730 | -1.23 | 8.59  | 2.15E-06 | 1.77E-05 | MCM2/3/5 family protein                                |
| TGME49_281570 | -3.93 | 5.67  | 2.18E-06 | 1.80E-05 | hypothetical protein                                   |
| TGME49_291090 | -8.87 | 5.22  | 2.18E-06 | 1.80E-05 | SWI2/SNF2-containing protein                           |
| TGME49_231200 | -2.78 | 6.19  | 2.21E-06 | 1.82E-05 | hypothetical protein                                   |
| TGME49_207640 | -1.63 | 7.49  | 2.22E-06 | 1.83E-05 | isoleucyl-tRNA synthetase family protein               |
| TGME49_239340 | -8.79 | 5.64  | 2.27E-06 | 1.86E-05 | hypothetical protein                                   |
| TGME49_250950 | 2.04  | 5.35  | 2.30E-06 | 1.89E-05 | KRUF family protein                                    |
| TGME49_266990 | -1.44 | 7.81  | 2.34E-06 | 1.92E-05 | beta-COP                                               |
| TGME49_259530 | -3.93 | 5.96  | 2.37E-06 | 1.95E-05 | GalNac                                                 |
| TGME49_312520 | -4.02 | 5.37  | 2.49E-06 | 2.04E-05 | tRNA dimethylallyltransferase                          |
| TGME49_202120 | -1.54 | 7.31  | 2.50E-06 | 2.04E-05 | hypothetical protein                                   |
| TGME49_310930 | -2.79 | 6.48  | 2.50E-06 | 2.04E-05 | hypothetical protein                                   |
| TGME49_288530 | 1.42  | 6.22  | 2.55E-06 | 2.07E-05 | NOL1/NOP2/sun family protein                           |
| TGME49_320450 | -3.24 | 6.15  | 2.57E-06 | 2.09E-05 | ribosome biogenesis regulatory protein (rrs1) protein  |
| TGME49_254910 | -2.81 | 6.12  | 2.58E-06 | 2.10E-05 | hypothetical protein                                   |
| TGME49_248160 | -8.80 | 5.47  | 2.58E-06 | 2.10E-05 | hypothetical protein                                   |
| TGME49_264720 | -3.91 | 5.63  | 2.61E-06 | 2.12E-05 | hypothetical protein                                   |
| TGME49_270230 | -8.80 | 5.30  | 2.62E-06 | 2.12E-05 | hypothetical protein                                   |
| TGME49_260450 | -8.80 | 5.10  | 2.63E-06 | 2.13E-05 | DEAD/DEAH box helicase domain-containing protein       |
| TGME49_225050 | -1.53 | 7.46  | 2.68E-06 | 2.17E-05 | adenosylhomocysteinase, putative                       |
| TGME49_235478 | -4.09 | 5.93  | 2.69E-06 | 2.17E-05 | pantothenate kinase                                    |
| TGME49_246100 | -2.24 | 6.79  | 2.71E-06 | 2.18E-05 | phosducin, putative                                    |
| TGME49_224235 | -8.78 | 5.14  | 2.75E-06 | 2.21E-05 | translation initiation factor IF-3 protein             |
| TGME49_213240 | -8.83 | 5.32  | 2.75E-06 | 2.21E-05 | hypothetical protein                                   |
| TGME49_305120 | 1.18  | 7.12  | 2.76E-06 | 2.22E-05 | transporter, solute:sodium symporter (SSS) family pr   |
| TGME49_221180 | 1.04  | 8.38  | 2.79E-06 | 2.24E-05 | hypothetical protein                                   |
| TGME49_228730 | -8.79 | 5.41  | 2.81E-06 | 2.25E-05 | hypothetical protein                                   |
| TGME49_313780 | -1.52 | 7.72  | 2.85E-06 | 2.28E-05 | hypothetical protein                                   |
| TGME49_264730 | -8.77 | 5.36  | 2.88E-06 | 2.30E-05 | hypothetical protein                                   |
| TGME49_264240 | -9.04 | 4.81  | 2.92E-06 | 2.33E-05 | hypothetical protein                                   |
| TGME49_219770 | -8.87 | 5.44  | 2.95E-06 | 2.36E-05 | 30S ribosomal protein S12, putative                    |
| TGME49_270090 | -3.16 | 6.03  | 2.96E-06 | 2.36E-05 | hypothetical protein                                   |
| TGME49_270610 | 1.83  | 5.44  | 2.97E-06 | 2.36E-05 | hypothetical protein                                   |
| TGME49_284010 | -3.91 | 5.48  | 3.03E-06 | 2.41E-05 | 5'-3' exonuclease, N-terminal resolvase family domain  |
| TGME49_205700 | 1.01  | 10.37 | 3.08E-06 | 2.44E-05 | cyclophilin precursor                                  |

|               |       |      |          |          |                                                       |
|---------------|-------|------|----------|----------|-------------------------------------------------------|
| TGME49_315250 | -3.92 | 6.00 | 3.08E-06 | 2.44E-05 | GAMM1 protein, putative                               |
| TGME49_315910 | 1.65  | 5.86 | 3.09E-06 | 2.45E-05 | hypothetical protein                                  |
| TGME49_205460 | -8.74 | 5.47 | 3.12E-06 | 2.47E-05 | AN1 family Zinc finger domain-containing protein      |
| TGME49_272010 | -3.93 | 6.12 | 3.14E-06 | 2.48E-05 | Gar1 protein RNA binding region protein               |
| TGME49_318290 | -8.76 | 5.09 | 3.14E-06 | 2.48E-05 | hypothetical protein                                  |
| TGME49_229630 | 1.02  | 8.70 | 3.17E-06 | 2.50E-05 | eIF2 kinase IF2K-A (incomplete catalytic triad)       |
| TGME49_278830 | -1.14 | 8.52 | 3.19E-06 | 2.50E-05 | glucose-6-phosphate 1-dehydrogenase                   |
| TGME49_204380 | -1.72 | 6.95 | 3.18E-06 | 2.50E-05 | hypothetical protein                                  |
| TGME49_230190 | -1.94 | 6.88 | 3.19E-06 | 2.50E-05 | hypothetical protein                                  |
| TGME49_238140 | -1.89 | 6.57 | 3.22E-06 | 2.52E-05 | hypothetical protein                                  |
| TGME49_306330 | -2.15 | 6.75 | 3.27E-06 | 2.56E-05 | phospholipase                                         |
| TGME49_223640 | -8.89 | 5.20 | 3.27E-06 | 2.56E-05 | hypothetical protein                                  |
| TGME49_212270 | 1.79  | 9.40 | 3.29E-06 | 2.57E-05 | hypothetical protein                                  |
| TGME49_222020 | -2.53 | 6.35 | 3.32E-06 | 2.60E-05 | phosphoglycerate kinase PGKII                         |
| TGME49_270140 | -8.77 | 5.48 | 3.33E-06 | 2.60E-05 | splicing factor DIM1, putative                        |
| TGME49_256840 | -3.89 | 5.96 | 3.35E-06 | 2.61E-05 | hypothetical protein                                  |
| TGME49_237500 | 1.01  | 7.44 | 3.37E-06 | 2.62E-05 | protein phosphatase 2C domain-containing protein      |
| TGME49_313350 | -3.88 | 5.75 | 3.37E-06 | 2.62E-05 | hypothetical protein                                  |
| TGME49_225990 | -2.75 | 6.32 | 3.40E-06 | 2.64E-05 | acyl transferase domain-containing protein            |
| TGME49_249790 | -3.89 | 5.87 | 3.42E-06 | 2.66E-05 | hypothetical protein                                  |
| TGME49_208590 | -1.79 | 7.00 | 3.61E-06 | 2.80E-05 | vacuolar ATP synthase subunit 54kD, putative          |
| TGME49_306470 | -2.47 | 6.39 | 3.63E-06 | 2.81E-05 | isoprenylcysteine carboxyl methyltransferase (icmt) f |
| TGME49_272475 | -8.78 | 5.24 | 3.67E-06 | 2.84E-05 | protein kinase domain-containing protein              |
| TGME49_270050 | 1.81  | 5.58 | 3.68E-06 | 2.84E-05 | hypothetical protein                                  |
| TGME49_291980 | -1.53 | 7.41 | 3.68E-06 | 2.84E-05 | HECT-domain (ubiquitin-transferase) domain-contain    |
| TGME49_275990 | 1.31  | 6.58 | 3.80E-06 | 2.92E-05 | hypothetical protein                                  |
| TGME49_212150 | -8.74 | 5.30 | 3.81E-06 | 2.93E-05 | hypothetical protein                                  |
| TGME49_267340 | 1.75  | 5.19 | 3.82E-06 | 2.93E-05 | hypothetical protein                                  |
| TGME49_214870 | 1.93  | 5.32 | 3.84E-06 | 2.94E-05 | ribosomal protein L9, N-terminal domain-containing    |
| TGME49_299900 | -8.72 | 5.26 | 3.85E-06 | 2.95E-05 | hypothetical protein                                  |
| TGME49_286180 | -8.73 | 4.90 | 3.85E-06 | 2.95E-05 | tRNA ligases class I (M) protein                      |
| TGME49_227450 | 1.05  | 7.22 | 3.88E-06 | 2.96E-05 | hydrolase, NUDIX family protein                       |
| TGME49_281990 | 1.70  | 5.47 | 3.93E-06 | 3.00E-05 | Nicotinamidase                                        |
| TGME49_318880 | 2.22  | 5.55 | 4.00E-06 | 3.05E-05 | hypothetical protein                                  |
| TGME49_300270 | 1.23  | 7.18 | 3.99E-06 | 3.05E-05 | hypothetical protein                                  |
| TGME49_273905 | -3.86 | 6.09 | 4.00E-06 | 3.05E-05 | hypothetical protein                                  |
| TGME49_313270 | -1.51 | 7.49 | 4.02E-06 | 3.06E-05 | hypothetical protein                                  |
| TGME49_253850 | 1.84  | 5.06 | 4.04E-06 | 3.07E-05 | hypothetical protein                                  |
| TGME49_294290 | -1.98 | 7.07 | 4.12E-06 | 3.12E-05 | Der1ER1                                               |
| TGME49_310860 | -2.48 | 6.37 | 4.12E-06 | 3.12E-05 | U5 snRNP-specific protein                             |
| TGME49_207180 | -8.79 | 5.29 | 4.12E-06 | 3.12E-05 | indole-3-glycerol phosphate synthase domain-contain   |
| TGME49_273370 | -2.91 | 6.35 | 4.14E-06 | 3.13E-05 | coatomer gamma 2-subunit protein, putative            |
| TGME49_220330 | -4.05 | 5.33 | 4.19E-06 | 3.17E-05 | hypothetical protein                                  |
| TGME49_316350 | -8.75 | 5.45 | 4.20E-06 | 3.17E-05 | hypothetical protein                                  |
| TGME49_269075 | -8.96 | 5.19 | 4.20E-06 | 3.17E-05 | hypothetical protein                                  |
| TGME49_253510 | 2.70  | 6.34 | 4.20E-06 | 3.17E-05 | transporter/permease protein                          |
| TGME49_309890 | -3.19 | 5.90 | 4.21E-06 | 3.17E-05 | hypothetical protein                                  |
| TGME49_216390 | -3.12 | 5.89 | 4.23E-06 | 3.18E-05 | RNA methyltransferase, TrmH family protein            |
| TGME49_216500 | -3.88 | 5.77 | 4.23E-06 | 3.18E-05 | tRNA synthetase, putative                             |
| TGME49_318480 | -2.48 | 6.16 | 4.29E-06 | 3.21E-05 | SWI2/SNF2-containing protein RAD5                     |
| TGME49_207210 | 2.74  | 6.73 | 4.31E-06 | 3.23E-05 | hypothetical protein                                  |
| TGME49_261600 | 1.15  | 7.25 | 4.31E-06 | 3.23E-05 | creatinase domain-containing protein                  |
| TGME49_300020 | -3.85 | 5.75 | 4.33E-06 | 3.24E-05 | ATP-dependent metallopeptidase HflB subfamily prot    |
| TGME49_210760 | -8.72 | 5.47 | 4.34E-06 | 3.24E-05 | glutamine amidotransferase-related, putative          |
| TGME49_232360 | -1.87 | 6.79 | 4.38E-06 | 3.27E-05 | exonuclease                                           |



|               |       |      |          |          |                                                         |
|---------------|-------|------|----------|----------|---------------------------------------------------------|
| TGME49_251710 | 2.12  | 5.03 | 4.42E-06 | 3.29E-05 | hypothetical protein                                    |
| TGME49_223510 | -8.72 | 5.27 | 4.51E-06 | 3.36E-05 | hypothetical protein                                    |
| TGME49_310100 | -8.73 | 5.39 | 4.65E-06 | 3.45E-05 | mannosyltransferase (pig-m) protein                     |
| TGME49_219170 | -1.93 | 6.59 | 4.65E-06 | 3.46E-05 | hypothetical protein                                    |
| TGME49_228490 | -2.73 | 6.14 | 4.71E-06 | 3.49E-05 | hypothetical protein                                    |
| TGME49_267620 | -2.52 | 6.97 | 4.71E-06 | 3.49E-05 | multi-pass transmembrane protein                        |
| TGME49_286630 | -1.41 | 7.93 | 4.77E-06 | 3.53E-05 | redoxin domain-containing protein                       |
| TGME49_243250 | -1.35 | 7.91 | 4.78E-06 | 3.53E-05 | myosin H                                                |
| TGME49_295960 | 1.65  | 7.35 | 4.82E-06 | 3.56E-05 | hypothetical protein                                    |
| TGME49_294020 | -8.74 | 5.25 | 4.84E-06 | 3.57E-05 | zinc finger, C3HC4 type (RING finger) domain-contain    |
| TGME49_255250 | -8.70 | 5.45 | 4.87E-06 | 3.58E-05 | tRNA (cytosine(34)-C(5))-methyltransferase, putative    |
| TGME49_259520 | -8.72 | 5.47 | 4.88E-06 | 3.59E-05 | hypothetical protein                                    |
| TGME49_232160 | 1.17  | 6.85 | 5.01E-06 | 3.68E-05 | zinc finger, C3HC4 type (RING finger) domain-contain    |
| TGME49_270900 | -3.24 | 6.04 | 5.02E-06 | 3.68E-05 | ATPase, AAA family protein                              |
| TGME49_295420 | 1.47  | 7.87 | 5.05E-06 | 3.71E-05 | hypothetical protein                                    |
| TGME49_304460 | -1.44 | 7.52 | 5.21E-06 | 3.82E-05 | zinc finger, C3HC4 type (RING finger) domain-contain    |
| TGME49_237480 | -3.84 | 5.71 | 5.27E-06 | 3.85E-05 | BRCA1 C Terminus (BRCT) domain-containing protein       |
| TGME49_215290 | -3.84 | 5.79 | 5.28E-06 | 3.86E-05 | saccharopine dehydrogenase domain-containing prot       |
| TGME49_289310 | -2.16 | 6.67 | 5.39E-06 | 3.94E-05 | cullin family protein                                   |
| TGME49_225060 | -2.45 | 6.46 | 5.40E-06 | 3.94E-05 | nucleoredoxin family protein                            |
| TGME49_297720 | -1.26 | 7.54 | 5.41E-06 | 3.94E-05 | trehalose-phosphatase                                   |
| TGME49_256770 | -1.30 | 7.59 | 5.48E-06 | 3.98E-05 | eukaryotic translation initiation factor 4A, isoform 3, |
| TGME49_263500 | -3.88 | 5.93 | 5.50E-06 | 4.00E-05 | vacuolar protein sorting-associated protein 26, putati  |
| TGME49_268580 | -3.87 | 6.06 | 5.52E-06 | 4.01E-05 | hypothetical protein                                    |
| TGME49_214370 | -8.68 | 5.49 | 5.55E-06 | 4.02E-05 | hypothetical protein                                    |
| TGME49_231215 | -8.68 | 5.41 | 5.55E-06 | 4.02E-05 | hypothetical protein                                    |
| TGME49_309110 | 1.29  | 6.61 | 5.58E-06 | 4.04E-05 | tRNA methyl transferase                                 |
| TGME49_208780 | -2.72 | 6.22 | 5.61E-06 | 4.06E-05 | ubiquitin-conjugating enzyme subfamily protein          |
| TGME49_222192 | -8.69 | 5.28 | 5.73E-06 | 4.14E-05 | hypothetical protein                                    |
| TGME49_214830 | -3.85 | 5.63 | 5.80E-06 | 4.19E-05 | hypothetical protein                                    |
| TGME49_226280 | 2.12  | 5.02 | 5.91E-06 | 4.26E-05 | ribosomal protein L28, putative                         |
| TGME49_255940 | 1.79  | 5.25 | 5.97E-06 | 4.30E-05 | hypothetical protein                                    |
| TGME49_285780 | -8.75 | 5.31 | 5.99E-06 | 4.31E-05 | hypothetical protein                                    |
| TGME49_248450 | -2.70 | 6.26 | 6.04E-06 | 4.34E-05 | zinc finger, C3HC4 type (RING finger) domain-contain    |
| TGME49_245590 | 1.89  | 5.36 | 6.07E-06 | 4.35E-05 | rhomboid protease ROM6                                  |
| TGME49_237290 | -1.58 | 7.15 | 6.08E-06 | 4.35E-05 | hypothetical protein                                    |
| TGME49_229500 | -3.82 | 5.70 | 6.08E-06 | 4.35E-05 | hypothetical protein                                    |
| TGME49_229490 | -2.71 | 6.21 | 6.10E-06 | 4.37E-05 | tetratricopeptide repeat-containing protein             |
| TGME49_314000 | 1.47  | 6.33 | 6.12E-06 | 4.38E-05 | peptide methionine sulfoxide reductase msrB, putati     |
| TGME49_228100 | -1.89 | 7.17 | 6.14E-06 | 4.38E-05 | hypothetical protein                                    |
| TGME49_271270 | -1.54 | 7.33 | 6.15E-06 | 4.38E-05 | hypothetical protein                                    |
| TGME49_301440 | -1.05 | 9.35 | 6.16E-06 | 4.38E-05 | calcium-dependent protein kinase CDPK1                  |
| TGME49_306030 | -1.69 | 7.04 | 6.17E-06 | 4.39E-05 | glutathione s-transferase, n-terminal domain contain    |
| TGME49_262040 | -2.27 | 6.75 | 6.19E-06 | 4.40E-05 | SAC3/GANP family protein                                |
| TGME49_208200 | -3.86 | 5.78 | 6.21E-06 | 4.41E-05 | PHD-finger domain-containing protein                    |
| TGME49_288290 | 1.85  | 5.66 | 6.34E-06 | 4.50E-05 | hypothetical protein                                    |
| TGME49_236250 | 1.47  | 5.67 | 6.34E-06 | 4.50E-05 | regulator of chromosome condensation (RCC1) repea       |
| TGME49_203840 | 1.53  | 5.77 | 6.35E-06 | 4.50E-05 | DEAD/DEAH box helicase domain-containing protein        |
| TGME49_201900 | -3.84 | 5.71 | 6.38E-06 | 4.52E-05 | hypothetical protein                                    |
| TGME49_316680 | 1.10  | 7.77 | 6.43E-06 | 4.54E-05 | RNA pseudouridine synthase superfamily protein          |
| TGME49_229780 | -3.83 | 5.86 | 6.43E-06 | 4.54E-05 | GHMP kinase, N-terminal domain-containing protein       |
| TGME49_305560 | -3.83 | 5.81 | 6.47E-06 | 4.57E-05 | Vps51/Vps67 protein                                     |
| TGME49_272390 | -8.67 | 5.13 | 6.48E-06 | 4.57E-05 | hypothetical protein                                    |
| TGME49_268890 | -1.69 | 7.12 | 6.59E-06 | 4.64E-05 | citrate synthase I                                      |
| TGME49_274130 | -8.65 | 5.27 | 6.68E-06 | 4.70E-05 | TBC domain-containing protein                           |

|               |       |      |          |          |                                                            |
|---------------|-------|------|----------|----------|------------------------------------------------------------|
| TGME49_225000 | -1.48 | 7.35 | 6.71E-06 | 4.72E-05 | hypothetical protein                                       |
| TGME49_271430 | -3.83 | 5.38 | 6.75E-06 | 4.74E-05 | hypothetical protein                                       |
| TGME49_268590 | 1.10  | 7.11 | 6.82E-06 | 4.78E-05 | rhomboid protease ROM4                                     |
| TGME49_248790 | 2.11  | 5.02 | 7.03E-06 | 4.92E-05 | hypothetical protein                                       |
| TGME49_228130 | 1.67  | 6.56 | 7.12E-06 | 4.97E-05 | hypothetical protein                                       |
| TGME49_242118 | -8.65 | 5.88 | 7.22E-06 | 5.04E-05 | myosin-light-chain kinase                                  |
| TGME49_295030 | 1.07  | 8.10 | 7.26E-06 | 5.06E-05 | hypothetical protein                                       |
| TGME49_239620 | -3.81 | 5.74 | 7.37E-06 | 5.13E-05 | 5'-nucleotidase, C-terminal domain-containing protein      |
| TGME49_248570 | -3.88 | 5.72 | 7.38E-06 | 5.14E-05 | hypothetical protein                                       |
| TGME49_260190 | -1.70 | 6.56 | 7.42E-06 | 5.16E-05 | microneme protein MIC13                                    |
| TGME49_202620 | 1.00  | 8.38 | 7.49E-06 | 5.20E-05 | hypothetical protein                                       |
| TGME49_259210 | -8.66 | 5.17 | 7.52E-06 | 5.22E-05 | jmjC domain-containing protein C2orf60                     |
| TGME49_246190 | -2.68 | 6.02 | 7.62E-06 | 5.28E-05 | hypothetical protein                                       |
| TGME49_216410 | -8.77 | 5.36 | 7.67E-06 | 5.31E-05 | hypothetical protein                                       |
| TGME49_262050 | 1.21  | 9.15 | 7.80E-06 | 5.39E-05 | rhophtry kinase family protein ROP39                       |
| TGME49_205750 | -2.41 | 6.42 | 7.96E-06 | 5.49E-05 | histone deacetylase complex subunit Sin3                   |
| TGME49_272770 | -3.81 | 5.80 | 8.05E-06 | 5.55E-05 | hypothetical protein                                       |
| TGME49_294740 | -2.10 | 6.49 | 8.09E-06 | 5.58E-05 | hypothetical protein                                       |
| TGME49_307610 | -2.05 | 6.31 | 8.15E-06 | 5.61E-05 | elongation factor TS, putative                             |
| TGME49_260830 | -3.12 | 5.42 | 8.25E-06 | 5.68E-05 | hypothetical protein                                       |
| TGME49_268900 | -8.63 | 5.16 | 8.41E-06 | 5.78E-05 | dense granular protein GRA10                               |
| TGME49_254290 | 1.44  | 6.05 | 8.52E-06 | 5.85E-05 | hypothetical protein                                       |
| TGME49_244110 | -1.41 | 8.05 | 8.61E-06 | 5.91E-05 | nucleosome assembly protein (nap) protein                  |
| TGME49_220100 | -2.35 | 6.73 | 8.64E-06 | 5.92E-05 | phosphoribosylpyrophosphate synthetase                     |
| TGME49_260370 | -2.21 | 6.27 | 8.83E-06 | 6.04E-05 | AtPH1 family protein                                       |
| TGME49_233140 | -2.06 | 7.17 | 8.88E-06 | 6.07E-05 | deoxyuridine 5'-triphosphate nucleotidohydrolase, putative |
| TGME49_252320 | -8.67 | 5.00 | 8.89E-06 | 6.07E-05 | Sas10/Utp3/C1D family protein                              |
| TGME49_247610 | 2.01  | 5.08 | 9.01E-06 | 6.14E-05 | small nuclear ribonucleoprotein E, putative                |
| TGME49_225470 | 1.29  | 6.28 | 9.00E-06 | 6.14E-05 | peptide methionine sulfoxide reductase                     |
| TGME49_264740 | 1.01  | 7.94 | 9.02E-06 | 6.14E-05 | hypothetical protein                                       |
| TGME49_264220 | -8.61 | 5.51 | 9.15E-06 | 6.22E-05 | hypothetical protein                                       |
| TGME49_289640 | 1.86  | 5.64 | 9.50E-06 | 6.45E-05 | hypothetical protein                                       |
| TGME49_289180 | -8.64 | 5.18 | 9.51E-06 | 6.45E-05 | thioredoxin family redox-active protein, putative          |
| TGME49_318400 | -1.56 | 7.52 | 9.55E-06 | 6.47E-05 | hypothetical protein                                       |
| TGME49_269705 | 2.18  | 5.10 | 9.65E-06 | 6.53E-05 | hypothetical protein                                       |
| TGME49_221500 | -8.62 | 5.41 | 9.65E-06 | 6.53E-05 | dual specificity phosphatase, catalytic domain-containing  |
| TGME49_228770 | -3.81 | 5.98 | 9.68E-06 | 6.54E-05 | hypothetical protein                                       |
| TGME49_229380 | -8.60 | 5.38 | 9.80E-06 | 6.61E-05 | hypothetical protein                                       |
| TGME49_217450 | 1.95  | 4.96 | 9.85E-06 | 6.63E-05 | general transcription factor IIH polypeptide 5 GTF2H5      |
| TGME49_234220 | -2.06 | 6.36 | 9.86E-06 | 6.64E-05 | hypothetical protein                                       |
| TGME49_235490 | -1.64 | 7.03 | 9.88E-06 | 6.64E-05 | hypothetical protein                                       |
| TGME49_323110 | 1.44  | 6.09 | 9.92E-06 | 6.66E-05 | hypothetical protein                                       |
| TGME49_211040 | -1.22 | 8.12 | 9.94E-06 | 6.66E-05 | Sec61beta family protein                                   |
| TGME49_273350 | 1.74  | 5.36 | 1.01E-05 | 6.77E-05 | molybdopterin converting factor, subunit 2 protein         |
| TGME49_277685 | -8.69 | 5.11 | 1.01E-05 | 6.77E-05 | hypothetical protein                                       |
| TGME49_267420 | 1.12  | 8.10 | 1.02E-05 | 6.78E-05 | mago nashi family protein 2, putative                      |
| TGME49_263750 | -2.21 | 5.91 | 1.02E-05 | 6.78E-05 | hypothetical protein                                       |
| TGME49_275310 | -3.07 | 5.96 | 1.02E-05 | 6.78E-05 | hypothetical protein                                       |
| TGME49_222290 | -3.78 | 5.85 | 1.02E-05 | 6.78E-05 | LSM domain-containing protein                              |
| TGME49_313400 | -1.86 | 7.11 | 1.02E-05 | 6.79E-05 | DnaJ domain-containing protein                             |
| TGME49_298840 | 1.42  | 6.20 | 1.04E-05 | 6.92E-05 | hypothetical protein                                       |
| TGME49_233790 | -8.60 | 5.24 | 1.05E-05 | 6.97E-05 | serine/threonine protein kinase AktR, putative             |
| TGME49_320090 | -2.61 | 6.48 | 1.05E-05 | 7.00E-05 | hypothetical protein                                       |
| TGME49_236570 | -1.19 | 7.93 | 1.06E-05 | 7.00E-05 | lysine decarboxylase family protein                        |
| TGME49_289000 | -3.04 | 5.79 | 1.07E-05 | 7.05E-05 | hypothetical protein                                       |

|               |       |      |          |             |                                                           |
|---------------|-------|------|----------|-------------|-----------------------------------------------------------|
| TGME49_211600 | -2.40 | 6.15 | 1.08E-05 | 7.11E-05    | hypothetical protein                                      |
| TGME49_203450 | -2.25 | 6.40 | 1.08E-05 | 7.12E-05    | DUF3228 domain-containing protein                         |
| TGME49_264860 | -3.77 | 5.69 | 1.08E-05 | 7.15E-05    | zinc finger, C3HC4 type (RING finger) domain-contain      |
| TGME49_217740 | -1.89 | 6.97 | 1.09E-05 | 7.16E-05    | 3-ketoacyl-(acyl-carrier-protein) reductase               |
| TGME49_269920 | -1.18 | 8.62 | 1.09E-05 | 7.17E-05    | phosphatidylserine decarboxylase                          |
| TGME49_205510 | -1.43 | 7.70 | 1.09E-05 | 7.17E-05    | nucleolar protein 5, putative                             |
| TGME49_224620 | 1.54  | 5.92 | 1.11E-05 | 7.31E-05    | hypothetical protein                                      |
| TGME49_262030 | -8.59 | 4.93 | 1.11E-05 | 7.31E-05    | ALG6, ALG8 glycosyltransferase family protein             |
| TGME49_212840 | -8.68 | 5.13 | 1.12E-05 | 7.32E-05    | HIT zinc finger protein                                   |
| TGME49_209240 | 1.50  | 5.74 | 1.13E-05 | 7.37E-05    | RNA methyltransferase                                     |
| TGME49_263610 | -1.78 | 6.91 | 1.13E-05 | 7.39E-05    | hypothetical protein                                      |
| TGME49_224660 | 1.12  | 6.78 | 1.15E-05 | 7.52E-05    | transcription factor s-ii (tfiis), central domain-contain |
| TGME49_227320 | -8.68 | 5.44 | 1.17E-05 | 7.60E-05    | hypothetical protein                                      |
| TGME49_314070 | 1.40  | 6.32 | 1.17E-05 | 7.61E-05    | hypothetical protein                                      |
| TGME49_247250 | -1.57 | 6.96 | 1.18E-05 | 7.68E-05    | RbAp46                                                    |
| TGME49_286560 | -8.68 | 5.40 | 1.18E-05 | 7.68E-05    | U6 snRNA-associated Sm family protein                     |
| TGME49_216380 | -2.49 | 6.35 | 1.21E-05 | 7.82E-05    | phospholipid-translocating P-type ATPase, flippase su     |
| TGME49_278700 | -3.04 | 5.93 | 1.21E-05 | 7.82E-05    | hypothetical protein                                      |
| TGME49_259830 | 1.66  | 6.46 | 1.22E-05 | 7.90E-05    | diacylglycerol kinase catalytic domain-containing pro     |
| TGME49_216120 | -2.20 | 6.42 | 1.24E-05 | 8.03E-05    | hypothetical protein                                      |
| TGME49_307575 | -3.79 | 5.16 | 1.28E-05 | 8.26E-05    | hypothetical protein                                      |
| TGME49_245650 | 2.51  | 4.74 | 1.29E-05 | 8.34E-05    | hypothetical protein                                      |
| TGME49_249460 | -8.57 | 5.36 | 1.29E-05 | 8.34E-05    | WD domain, G-beta repeat-containing protein               |
| TGME49_301350 | -8.70 | 4.95 | 1.29E-05 | 8.34E-05    | SNARE associated protein                                  |
| TGME49_270720 | -8.74 | 5.34 | 1.29E-05 | 8.34E-05    | hypothetical protein                                      |
| TGME49_230580 | -8.56 | 5.21 | 1.31E-05 | 8.44E-05    | hypothetical protein                                      |
| TGME49_306300 | -1.64 | 6.39 | 1.32E-05 | 8.48E-05    | hypothetical protein                                      |
| TGME49_243210 | 1.03  | 7.22 | 1.33E-05 | 8.56E-05    | DUF862 domain-containing protein                          |
| TGME49_263210 | -8.59 | 5.06 | 1.33E-05 | 8.56E-05    | ubiquitin interaction motif domain-containing protein     |
| TGME49_257340 | -8.55 | 5.20 | 1.38E-05 | 8.83E-05    | Ras family protein                                        |
| TGME49_285980 | 1.15  | 8.53 | 1.38E-05 | 8.85E-05    | glucosephosphate-mutase GPM1                              |
| TGME49_300055 | 1.21  | 7.81 | 1.39E-05 | 8.92E-05    | hypothetical protein                                      |
| TGME49_264690 | -8.55 | 5.40 | 1.43E-05 | 9.13E-05    | cyclin 4, putative                                        |
| TGME49_244670 | -1.63 | 6.91 | 1.43E-05 | 9.13E-05    | hypothetical protein                                      |
| TGME49_228200 | 1.13  | 7.28 | 1.45E-05 | 9.26E-05    | vacuolar (h+)-atpase g subunit protein                    |
| TGME49_234390 | -8.59 | 5.43 | 1.45E-05 | 9.26E-05    | hypothetical protein                                      |
| TGME49_294050 | 1.76  | 7.02 | 1.47E-05 | 9.37E-05    | hypothetical protein                                      |
| TGME49_244610 | -3.73 | 5.46 | 1.48E-05 | 9.39E-05    | zinc finger, C3HC4 type (RING finger) domain-contain      |
| TGME49_229720 | -3.02 | 5.39 | 1.48E-05 | 9.41E-05    | hypothetical protein                                      |
| TGME49_203060 | 1.09  | 7.36 | 1.49E-05 | 9.44E-05    | hypothetical protein                                      |
| TGME49_269650 | -1.61 | 7.00 | 1.49E-05 | 9.47E-05    | FFD and TFG box motifs protein                            |
| TGME49_270750 | -2.27 | 6.29 | 1.50E-05 | 9.54E-05    | hypothetical protein                                      |
| TGME49_309950 | -8.54 | 5.31 | 1.52E-05 | 9.64E-05    | NLE (NUC135) domain-containing protein                    |
| TGME49_280410 | -1.82 | 6.69 | 1.53E-05 | 9.68E-05    | 3'5'-cyclic nucleotide phosphodiesterase domain-con       |
| TGME49_263100 | -2.77 | 5.96 | 1.53E-05 | 9.69E-05    | hypothetical protein                                      |
| TGME49_275670 | -1.25 | 8.05 | 1.54E-05 | 9.76E-05    | alveolin domain containing intermediate filament IM       |
| TGME49_312500 | -1.57 | 7.05 | 1.56E-05 | 9.85E-05    | hypothetical protein                                      |
| TGME49_288930 | -2.41 | 6.16 | 1.56E-05 | 9.86E-05    | hypothetical protein                                      |
| TGME49_202460 | -1.92 | 6.49 | 1.58E-05 | 9.93E-05    | diacylglycerol kinase accessory domain (presumed) d       |
| TGME49_287270 | -2.62 | 6.15 | 1.58E-05 | 9.93E-05    | hypothetical protein                                      |
| TGME49_236890 | 1.05  | 7.15 | 1.61E-05 | 0.000101415 | hypothetical protein                                      |
| TGME49_216130 | -1.93 | 6.73 | 1.62E-05 | 0.000101752 | ubiquitin conjugating enzyme E2, putative                 |
| TGME49_300380 | -2.99 | 5.70 | 1.62E-05 | 0.000101844 | endoplasmic reticulum oxidoreductin, putative             |
| TGME49_272680 | -8.53 | 5.08 | 1.63E-05 | 0.00010193  | hypothetical protein                                      |
| TGME49_223150 | -8.53 | 5.15 | 1.65E-05 | 0.000103079 | START domain-containing protein                           |

|               |       |       |          |             |                                                        |
|---------------|-------|-------|----------|-------------|--------------------------------------------------------|
| TGME49_295850 | -1.35 | 7.27  | 1.65E-05 | 0.000103369 | cyclic nucleotide-binding domain-containing protein    |
| TGME49_221690 | -3.74 | 5.62  | 1.69E-05 | 0.000105698 | hypothetical protein                                   |
| TGME49_227350 | -3.12 | 5.75  | 1.70E-05 | 0.000106013 | hypothetical protein                                   |
| TGME49_219460 | -2.98 | 5.68  | 1.71E-05 | 0.000106427 | hypothetical protein                                   |
| TGME49_240540 | -2.20 | 6.41  | 1.73E-05 | 0.000107996 | hypothetical protein                                   |
| TGME49_304470 | -2.98 | 5.83  | 1.75E-05 | 0.000109031 | oxidoreductase, putative                               |
| TGME49_297810 | -1.31 | 7.88  | 1.79E-05 | 0.000111477 | hypothetical protein                                   |
| TGME49_213660 | -1.12 | 9.72  | 1.80E-05 | 0.000111697 | zinc finger (CCCH type) motif-containing protein       |
| TGME49_253180 | 1.98  | 7.48  | 1.82E-05 | 0.000112467 | hypothetical protein                                   |
| TGME49_233500 | 1.19  | 8.04  | 1.82E-05 | 0.000112467 | triose-phosphate isomerase TPI-II                      |
| TGME49_218910 | 2.04  | 5.24  | 1.82E-05 | 0.000112684 | hypothetical protein                                   |
| TGME49_217350 | -8.53 | 5.39  | 1.82E-05 | 0.000112765 | methyltransferase MTA70, putative                      |
| TGME49_213620 | 1.68  | 5.49  | 1.83E-05 | 0.00011278  | ABC1 family protein                                    |
| TGME49_264650 | -8.61 | 4.90  | 1.83E-05 | 0.000112935 | phosphoacetylglucosamine mutase                        |
| TGME49_221610 | -2.20 | 6.25  | 1.84E-05 | 0.000113422 | ubiquitin carboxyl-terminal hydrolase                  |
| TGME49_249820 | -2.97 | 5.81  | 1.86E-05 | 0.000114634 | ATP-binding cassette sub-family B member 5             |
| TGME49_273815 | -8.57 | 5.51  | 1.86E-05 | 0.000114773 | hypothetical protein                                   |
| TGME49_209820 | -8.54 | 5.29  | 1.89E-05 | 0.000116158 | syntaxin protein                                       |
| TGME49_220450 | -8.51 | 4.82  | 1.89E-05 | 0.000116228 | ribonuclease HI protein                                |
| TGME49_261430 | -2.17 | 5.96  | 1.90E-05 | 0.000116801 | hypothetical protein                                   |
| TGME49_329800 | -1.74 | 6.84  | 1.91E-05 | 0.000117486 | hypothetical protein                                   |
| TGME49_222210 | -8.50 | 5.46  | 1.92E-05 | 0.000117928 | SPFH domain / Band 7 family protein                    |
| TGME49_280450 | -8.54 | 4.79  | 1.94E-05 | 0.000118561 | hypothetical protein                                   |
| TGME49_307260 | 2.82  | 5.67  | 1.96E-05 | 0.000119856 | Toxoplasma gondii family C protein                     |
| TGME49_215775 | -1.20 | 10.26 | 1.97E-05 | 0.000120105 | rhoptry protein ROP8                                   |
| TGME49_306960 | -2.15 | 6.60  | 2.01E-05 | 0.000122538 | phenylalanine--tRNA ligase, beta subunit protein       |
| TGME49_297140 | -2.97 | 5.78  | 2.01E-05 | 0.000122538 | U6 snRNA-associated sm family protein Lsm2, putativ    |
| TGME49_233680 | -8.49 | 5.02  | 2.01E-05 | 0.000122538 | nuclear movement family protein                        |
| TGME49_271350 | -8.50 | 5.41  | 2.02E-05 | 0.000122538 | bifunctional protein FolC subfamily protein            |
| TGME49_316570 | 1.05  | 7.16  | 2.02E-05 | 0.000122555 | hypothetical protein                                   |
| TGME49_251670 | -3.69 | 5.58  | 2.06E-05 | 0.0001252   | werner helicase interacting protein 1, putative        |
| TGME49_311220 | -2.25 | 6.31  | 2.07E-05 | 0.000125654 | hypothetical protein                                   |
| TGME49_261000 | -1.56 | 7.03  | 2.10E-05 | 0.000126964 | MutS domain V domain-containing protein                |
| TGME49_310570 | -8.60 | 5.49  | 2.10E-05 | 0.000126964 | hypothetical protein                                   |
| TGME49_254800 | 1.78  | 5.35  | 2.11E-05 | 0.00012753  | hypothetical protein                                   |
| TGME49_213880 | 2.67  | 4.99  | 2.14E-05 | 0.000129303 | hypothetical protein                                   |
| TGME49_246160 | 2.31  | 4.93  | 2.14E-05 | 0.00012945  | hypothetical protein                                   |
| TGME49_230350 | -1.13 | 8.27  | 2.15E-05 | 0.000129988 | hypothetical protein                                   |
| TGME49_226420 | -1.59 | 6.96  | 2.17E-05 | 0.000130942 | peptidase family M3 protein                            |
| TGME49_219485 | 1.26  | 6.92  | 2.17E-05 | 0.000131063 | hypothetical protein                                   |
| TGME49_257945 | 2.51  | 4.77  | 2.21E-05 | 0.000133157 | 3'5'-cyclic nucleotide phosphodiesterase domain-con    |
| TGME49_212930 | 2.47  | 5.60  | 2.24E-05 | 0.00013449  | NifU family domain-containing protein                  |
| TGME49_271870 | -8.47 | 5.32  | 2.24E-05 | 0.00013483  | zinc carboxypeptidase superfamily protein              |
| TGME49_224600 | -3.70 | 5.60  | 2.27E-05 | 0.00013634  | GTP binding protein                                    |
| TGME49_243340 | -8.47 | 5.12  | 2.36E-05 | 0.000141014 | atypical MEK-related kinase (incomplete catalytic tria |
| TGME49_227010 | -8.64 | 5.24  | 2.35E-05 | 0.000141014 | rhoptry kinase family protein ROP30                    |
| TGME49_248870 | 1.25  | 6.40  | 2.36E-05 | 0.000141145 | SNARE associated Golgi protein                         |
| TGME49_205300 | 1.24  | 6.67  | 2.38E-05 | 0.000142361 | hypothetical protein                                   |
| TGME49_299150 | -8.50 | 5.15  | 2.39E-05 | 0.000142798 | AP2 domain transcription factor AP2III-3               |
| TGME49_310710 | -3.67 | 5.64  | 2.41E-05 | 0.000143662 | small ribosomal subunit Rsm22 protein                  |
| TGME49_310850 | -8.54 | 5.31  | 2.41E-05 | 0.000143662 | MYND finger domain-containing protein                  |
| TGME49_288800 | 3.24  | 6.83  | 2.43E-05 | 0.000144519 | endonuclease/exonuclease/phosphatase family prote      |
| TGME49_309130 | -8.47 | 5.04  | 2.47E-05 | 0.00014694  | hypothetical protein                                   |
| TGME49_202030 | -1.49 | 6.98  | 2.50E-05 | 0.000148406 | hypothetical protein                                   |
| TGME49_239560 | -8.57 | 5.38  | 2.53E-05 | 0.000150281 | myosin E                                               |

|               |       |      |          |             |                                                            |
|---------------|-------|------|----------|-------------|------------------------------------------------------------|
| TGME49_310320 | -3.68 | 5.64 | 2.55E-05 | 0.000150713 | calreticulin family protein                                |
| TGME49_269320 | -8.53 | 5.04 | 2.55E-05 | 0.000150713 | hypothetical protein                                       |
| TGME49_308880 | -8.48 | 5.26 | 2.56E-05 | 0.000151358 | ImpB/MucB/SamB family protein                              |
| TGME49_300290 | -8.49 | 5.41 | 2.57E-05 | 0.000151842 | SNARE domain-containing protein                            |
| TGME49_217360 | -2.95 | 5.95 | 2.58E-05 | 0.000152247 | hypothetical protein                                       |
| TGME49_233760 | -2.63 | 5.69 | 2.59E-05 | 0.000152684 | hypothetical protein                                       |
| TGME49_242800 | -1.79 | 6.66 | 2.61E-05 | 0.000153773 | ribosome biogenesis protein NSA2, putative                 |
| TGME49_265460 | 1.37  | 6.01 | 2.63E-05 | 0.000154666 | hypothetical protein                                       |
| TGME49_244510 | -8.46 | 4.91 | 2.65E-05 | 0.000155823 | AP2 domain transcription factor AP2VI-3                    |
| TGME49_228340 | -8.49 | 5.00 | 2.67E-05 | 0.000157303 | hypothetical protein                                       |
| TGME49_281980 | -1.49 | 6.99 | 2.79E-05 | 0.000163455 | phosphatidate cytidylyltransferase                         |
| TGME49_227430 | -1.89 | 6.17 | 2.79E-05 | 0.000163455 | transmembrane amino acid transporter protein               |
| TGME49_262980 | -8.46 | 5.23 | 2.82E-05 | 0.000164979 | hypothetical protein                                       |
| TGME49_310670 | -1.17 | 7.93 | 2.87E-05 | 0.000167675 | glycogen phosphorylase 1, putative                         |
| TGME49_310560 | -3.68 | 5.55 | 2.87E-05 | 0.000167675 | hypothetical protein                                       |
| TGME49_212860 | 1.11  | 6.72 | 2.89E-05 | 0.000168332 | hypothetical protein                                       |
| TGME49_264960 | -8.46 | 5.17 | 2.89E-05 | 0.000168332 | hypothetical protein                                       |
| TGME49_309100 | 2.16  | 5.47 | 2.93E-05 | 0.000170048 | hypothetical protein                                       |
| TGME49_254606 | 2.48  | 5.92 | 2.94E-05 | 0.000170522 | hypothetical protein                                       |
| TGME49_233490 | -8.54 | 5.10 | 2.97E-05 | 0.000172251 | hypothetical protein                                       |
| TGME49_219310 | -1.29 | 8.62 | 2.97E-05 | 0.000172366 | DnaK family protein                                        |
| TGME49_219738 | -1.76 | 6.44 | 3.00E-05 | 0.000173918 | hypothetical protein                                       |
| TGME49_285210 | -8.51 | 5.26 | 3.01E-05 | 0.000173918 | hypothetical protein                                       |
| TGME49_223900 | 2.09  | 5.15 | 3.04E-05 | 0.000175457 | hypothetical protein                                       |
| TGME49_312530 | 1.09  | 6.83 | 3.05E-05 | 0.000176189 | splicing factor, CC1 family protein                        |
| TGME49_268720 | -2.96 | 5.82 | 3.06E-05 | 0.000176775 | Hrf1 family protein                                        |
| TGME49_234670 | 1.80  | 5.29 | 3.08E-05 | 0.000177639 | actin-like family protein                                  |
| TGME49_266750 | -1.29 | 7.68 | 3.09E-05 | 0.000178333 | transporter/permease protein, putative                     |
| TGME49_216170 | -3.81 | 5.73 | 3.13E-05 | 0.000180303 | SufS subfamily cysteine desulfurase                        |
| TGME49_242870 | -8.42 | 5.35 | 3.16E-05 | 0.000181587 | histone lysine methyltransferase, SET, putative            |
| TGME49_231030 | -3.65 | 5.64 | 3.16E-05 | 0.00018177  | hypothetical protein                                       |
| TGME49_240300 | -8.47 | 5.18 | 3.20E-05 | 0.000183758 | zinc finger domain, LSD1 subclass domain-containing        |
| TGME49_272640 | -1.99 | 6.34 | 3.20E-05 | 0.000183775 | eukaryotic initiation factor-2B, epsilon subunit, putative |
| TGME49_221350 | -3.63 | 5.68 | 3.22E-05 | 0.00018443  | Ctr copper transporter family protein                      |
| TGME49_217750 | -3.64 | 5.56 | 3.27E-05 | 0.000187373 | hypothetical protein                                       |
| TGME49_320550 | -1.90 | 6.64 | 3.27E-05 | 0.000187504 | hypothetical protein                                       |
| TGME49_294190 | -3.66 | 5.22 | 3.33E-05 | 0.000190148 | enoyl-CoA hydratase/isomerase family protein               |
| TGME49_293380 | -8.48 | 5.33 | 3.33E-05 | 0.000190469 | histone lysine acetyltransferase HAT1                      |
| TGME49_223570 | 1.23  | 7.66 | 3.35E-05 | 0.000191443 | hypothetical protein                                       |
| TGME49_321610 | -8.43 | 4.89 | 3.36E-05 | 0.000191566 | hypothetical protein                                       |
| TGME49_226740 | 1.36  | 7.97 | 3.39E-05 | 0.00019296  | zinc finger, C3HC4 type (RING finger) domain-containing    |
| TGME49_265400 | -1.73 | 6.69 | 3.39E-05 | 0.00019296  | hypothetical protein                                       |
| TGME49_314890 | -3.63 | 5.41 | 3.39E-05 | 0.00019296  | ThiF family protein                                        |
| TGME49_235420 | -1.30 | 7.24 | 3.40E-05 | 0.000193504 | hypothetical protein                                       |
| TGME49_321440 | -1.15 | 7.84 | 3.41E-05 | 0.000193602 | SWI2/SNF2 ISWI-like SANT                                   |
| TGME49_250100 | 2.16  | 6.89 | 3.44E-05 | 0.000195198 | hypothetical protein                                       |
| TGME49_215210 | 2.39  | 6.31 | 3.46E-05 | 0.000195936 | hypothetical protein                                       |
| TGME49_235460 | 1.27  | 6.18 | 3.46E-05 | 0.000195936 | hypothetical protein                                       |
| TGME49_213890 | -8.58 | 5.03 | 3.45E-05 | 0.000195936 | Myb family DNA-binding domain-containing protein           |
| TGME49_254380 | -8.44 | 5.12 | 3.48E-05 | 0.000197086 | ribosomal protein L11, putative                            |
| TGME49_214530 | -2.02 | 6.38 | 3.53E-05 | 0.000199604 | DnaJ domain-containing protein                             |
| TGME49_232020 | -1.93 | 6.60 | 3.58E-05 | 0.000202099 | hypothetical protein                                       |
| TGME49_251680 | -1.19 | 8.93 | 3.61E-05 | 0.000203821 | histamine-releasing factor, putative                       |
| TGME49_290890 | -2.29 | 6.43 | 3.64E-05 | 0.000204997 | carbonyl reductase 1, putative                             |
| TGME49_204270 | -2.35 | 6.05 | 3.64E-05 | 0.000204997 | hypothetical protein                                       |

|               |       |      |          |             |                                                           |
|---------------|-------|------|----------|-------------|-----------------------------------------------------------|
| TGME49_246780 | -8.42 | 4.74 | 3.64E-05 | 0.000204997 | hypothetical protein                                      |
| TGME49_230590 | -8.41 | 5.22 | 3.67E-05 | 0.000206385 | chitobiosyldiphosphodolichol beta-mannosyltransferase     |
| TGME49_288710 | 1.75  | 5.08 | 3.67E-05 | 0.000206582 | hypothetical protein                                      |
| TGME49_210778 | -1.95 | 6.36 | 3.68E-05 | 0.000206695 | hemimethylated DNA binding domain-containing protein      |
| TGME49_220460 | -8.40 | 4.98 | 3.74E-05 | 0.000209642 | SNF7 family protein                                       |
| TGME49_215360 | 1.97  | 5.74 | 3.75E-05 | 0.000210466 | hypothetical protein                                      |
| TGME49_271460 | 1.54  | 6.76 | 3.81E-05 | 0.000213142 | protein c14orf29, putative                                |
| TGME49_227030 | -1.78 | 6.87 | 3.81E-05 | 0.000213142 | hypothetical protein                                      |
| TGME49_297230 | -1.95 | 6.39 | 3.84E-05 | 0.000214396 | Vps53 family, N-terminal protein                          |
| TGME49_262060 | -2.90 | 5.97 | 3.85E-05 | 0.000214759 | hypothetical protein                                      |
| TGME49_246230 | -8.45 | 5.20 | 3.87E-05 | 0.000216064 | hypothetical protein                                      |
| TGME49_297245 | -1.42 | 7.00 | 3.99E-05 | 0.000222207 | transporter, major facilitator family protein             |
| TGME49_231910 | -1.42 | 7.36 | 3.99E-05 | 0.000222207 | ATP synthase F1 gamma subunit                             |
| TGME49_202950 | -1.27 | 7.30 | 3.99E-05 | 0.000222131 | hypothetical protein                                      |
| TGME49_276170 | 1.53  | 9.19 | 4.02E-05 | 0.000223262 | phosphatidylinositol 3- and 4-kinase                      |
| TGME49_225920 | -2.52 | 5.83 | 4.09E-05 | 0.0002272   | hypothetical protein                                      |
| TGME49_321300 | -3.61 | 5.37 | 4.16E-05 | 0.00023074  | autophagy-related 12 variant 1, putative                  |
| TGME49_283850 | -1.75 | 8.26 | 4.19E-05 | 0.000232242 | peptidyl-prolyl cis-trans isomerase                       |
| TGME49_307605 | -1.52 | 6.90 | 4.21E-05 | 0.000232885 | hypothetical protein                                      |
| TGME49_281900 | -1.27 | 7.26 | 4.28E-05 | 0.000236494 | SET domain containing lysine methyltransferase KMT        |
| TGME49_312190 | -1.66 | 6.85 | 4.29E-05 | 0.00023702  | hypothetical protein                                      |
| TGME49_206390 | -8.38 | 4.99 | 4.29E-05 | 0.00023702  | hypothetical protein                                      |
| TGME49_248150 | -3.61 | 5.73 | 4.31E-05 | 0.000237787 | hypothetical protein                                      |
| TGME49_277910 | 1.02  | 6.76 | 4.31E-05 | 0.000237802 | thrombospondin type 1 domain-containing protein           |
| TGME49_255390 | -3.61 | 5.42 | 4.35E-05 | 0.000239606 | HEAT repeat-containing protein                            |
| TGME49_227948 | -1.07 | 8.32 | 4.36E-05 | 0.000239936 | peptidase M16 inactive domain-containing protein          |
| TGME49_230430 | -8.37 | 5.34 | 4.38E-05 | 0.000240753 | vesicle-associated membrane protein, putative             |
| TGME49_238110 | -2.31 | 6.29 | 4.42E-05 | 0.000242712 | replication factor a protein 3 protein                    |
| TGME49_201870 | -2.12 | 6.58 | 4.42E-05 | 0.00024272  | tetratricopeptide repeat-containing protein               |
| TGME49_319320 | -1.77 | 6.45 | 4.45E-05 | 0.000244524 | hypothetical protein                                      |
| TGME49_239710 | -8.40 | 5.20 | 4.47E-05 | 0.000244981 | phosphomannomutase                                        |
| TGME49_285810 | -8.37 | 4.79 | 4.48E-05 | 0.000245354 | MYND finger domain-containing protein                     |
| TGME49_257755 | 2.33  | 5.37 | 4.48E-05 | 0.000245515 | hypothetical protein                                      |
| TGME49_221710 | -2.51 | 5.92 | 4.52E-05 | 0.000247134 | TBC domain-containing protein                             |
| TGME49_212960 | -8.41 | 5.30 | 4.52E-05 | 0.000247134 | hypothetical protein                                      |
| TGME49_275980 | -3.59 | 5.59 | 4.53E-05 | 0.000247734 | coenzyme q (ubiquinone) biosynthesis protein coq4 protein |
| TGME49_311150 | -3.61 | 5.60 | 4.55E-05 | 0.000248243 | hypothetical protein                                      |
| TGME49_252870 | 1.89  | 4.88 | 4.69E-05 | 0.000255365 | hypothetical protein                                      |
| TGME49_312860 | -2.92 | 5.92 | 4.74E-05 | 0.000257627 | hypothetical protein                                      |
| TGME49_233860 | -8.46 | 4.93 | 4.74E-05 | 0.000257627 | DALR anticodon binding domain-containing protein          |
| TGME49_286800 | -8.40 | 5.19 | 4.75E-05 | 0.00025781  | hypothetical protein                                      |
| TGME49_300285 | -8.51 | 5.23 | 4.78E-05 | 0.000259691 | hypothetical protein                                      |
| TGME49_269150 | -8.38 | 5.14 | 4.85E-05 | 0.000262797 | DHHC zinc finger domain-containing protein                |
| TGME49_243490 | -8.38 | 5.07 | 4.87E-05 | 0.00026392  | BCS1 family isoform 9, putative                           |
| TGME49_310380 | -8.38 | 5.10 | 4.88E-05 | 0.000264349 | brix domain containing protein                            |
| TGME49_260650 | -3.62 | 5.40 | 5.04E-05 | 0.000272486 | glycosyltransferase, group 2 family protein               |
| TGME49_215660 | -8.35 | 5.03 | 5.05E-05 | 0.000272902 | hypothetical protein                                      |
| TGME49_261510 | 3.26  | 5.09 | 5.09E-05 | 0.000275083 | hypothetical protein                                      |
| TGME49_275780 | -8.35 | 4.85 | 5.20E-05 | 0.000280618 | hypothetical protein                                      |
| TGME49_221200 | 1.24  | 7.36 | 5.23E-05 | 0.000281877 | CW-type Zinc Finger protein                               |
| TGME49_308580 | -2.50 | 5.95 | 5.27E-05 | 0.000283992 | Lon protease family protein                               |
| TGME49_209960 | -1.69 | 6.95 | 5.28E-05 | 0.000284174 | glycosyltransferase                                       |
| TGME49_306560 | -2.99 | 5.99 | 5.28E-05 | 0.000284288 | hypothetical protein                                      |
| TGME49_216930 | -1.62 | 6.83 | 5.32E-05 | 0.000286318 | cholinephosphate cytidyltransferase                       |
| TGME49_301300 | -8.35 | 4.71 | 5.36E-05 | 0.000288024 | hypothetical protein                                      |

|               |       |       |          |             |                                                     |
|---------------|-------|-------|----------|-------------|-----------------------------------------------------|
| TGME49_210682 | 2.68  | 5.90  | 5.36E-05 | 0.000288032 | hypothetical protein                                |
| TGME49_225290 | 2.09  | 6.40  | 5.38E-05 | 0.000288897 | GDA1/CD39 (nucleoside phosphatase) family protein   |
| TGME49_238940 | 2.31  | 4.73  | 5.40E-05 | 0.000289356 | GDP mannose 4,6-dehydratase, putative               |
| TGME49_284050 | -1.75 | 6.47  | 5.40E-05 | 0.000289356 | DEAD/DEAH box helicase domain-containing protein    |
| TGME49_291590 | -8.34 | 4.86  | 5.48E-05 | 0.000293612 | hypothetical protein                                |
| TGME49_217880 | -8.37 | 4.80  | 5.59E-05 | 0.000298702 | RNA-binding protein Nova-1, putative                |
| TGME49_245670 | -1.06 | 7.70  | 5.60E-05 | 0.00029932  | pyruvate dehydrogenase complex subunit PDH-E1Alp    |
| TGME49_315470 | -1.22 | 7.68  | 5.61E-05 | 0.000299668 | hypothetical protein                                |
| TGME49_249380 | 1.58  | 7.53  | 5.64E-05 | 0.000300711 | DHHC zinc finger domain-containing protein          |
| TGME49_215920 | 1.80  | 5.98  | 5.64E-05 | 0.000300725 | hypothetical protein                                |
| TGME49_289700 | -2.49 | 6.24  | 5.68E-05 | 0.000302477 | hypothetical protein                                |
| TGME49_286090 | 1.21  | 9.78  | 5.72E-05 | 0.000303647 | translation initiation factor SUI1, putative        |
| TGME49_239752 | -1.15 | 8.30  | 5.72E-05 | 0.000303647 | hypothetical protein                                |
| TGME49_293330 | -8.34 | 5.03  | 5.71E-05 | 0.000303647 | hypothetical protein                                |
| TGME49_234190 | -1.10 | 8.32  | 5.74E-05 | 0.000304459 | serine hydroxymethyltransferase 2, putative         |
| TGME49_284780 | -1.22 | 7.47  | 5.76E-05 | 0.000305516 | hypothetical protein                                |
| TGME49_261940 | -8.35 | 4.88  | 5.78E-05 | 0.000306191 | hydrolase, alpha/beta fold family protein           |
| TGME49_246030 | -8.35 | 5.02  | 5.80E-05 | 0.00030704  | mediator complex subunit MED17                      |
| TGME49_314280 | 2.21  | 5.65  | 5.81E-05 | 0.000307384 | AAR2 protein                                        |
| TGME49_239610 | -3.57 | 5.48  | 5.82E-05 | 0.000307456 | hypothetical protein                                |
| TGME49_251500 | -1.11 | 8.09  | 5.82E-05 | 0.000307629 | eukaryotic initiation factor-3, subunit 3, putative |
| TGME49_276900 | -3.60 | 5.41  | 5.91E-05 | 0.000311672 | hypothetical protein                                |
| TGME49_289190 | -8.32 | 4.82  | 5.93E-05 | 0.000312565 | tetratricopeptide repeat-containing protein         |
| TGME49_308810 | -1.22 | 8.08  | 5.94E-05 | 0.000312657 | rhoptry neck protein RON9                           |
| TGME49_268170 | -8.41 | 5.25  | 5.93E-05 | 0.000312657 | hypothetical protein                                |
| TGME49_259950 | 1.96  | 7.95  | 5.96E-05 | 0.000313905 | carbonate dehydratase, eukaryotic-type domain-cont  |
| TGME49_306620 | 2.00  | 6.62  | 5.98E-05 | 0.00031422  | AP2 domain transcription factor AP2IX-9             |
| TGME49_235402 | -8.39 | 4.70  | 5.98E-05 | 0.00031422  | CorA family Mg <sup>2+</sup> transporter protein    |
| TGME49_230050 | 1.74  | 4.96  | 6.08E-05 | 0.000319503 | 50S ribosomal protein L3, putative                  |
| TGME49_227115 | -8.32 | 5.08  | 6.12E-05 | 0.000321395 | hypothetical protein                                |
| TGME49_272670 | -8.33 | 4.99  | 6.15E-05 | 0.000322525 | peptidase family M3 protein                         |
| TGME49_248850 | -8.35 | 5.24  | 6.17E-05 | 0.000323067 | methionine aminopeptidase                           |
| TGME49_227140 | 2.29  | 4.81  | 6.21E-05 | 0.000325185 | hypothetical protein                                |
| TGME49_266100 | 1.05  | 6.94  | 6.29E-05 | 0.000328846 | rhoptry kinase family protein ROP41                 |
| TGME49_264190 | -2.85 | 5.48  | 6.28E-05 | 0.000328846 | hypothetical protein                                |
| TGME49_277540 | -8.33 | 4.89  | 6.31E-05 | 0.000329725 | hypothetical protein                                |
| TGME49_225300 | -1.82 | 6.43  | 6.37E-05 | 0.000332843 | hypothetical protein                                |
| TGME49_208050 | -2.54 | 5.98  | 6.41E-05 | 0.000334354 | ABC transporter, putative                           |
| TGME49_202800 | -8.37 | 4.80  | 6.41E-05 | 0.000334354 | cytochrome c oxidase assembly protein COX11, putat  |
| TGME49_219260 | -1.30 | 6.99  | 6.49E-05 | 0.000337969 | cation-transporting ATPase, putative                |
| TGME49_293780 | 1.19  | 7.14  | 6.50E-05 | 0.000338302 | hypothetical protein                                |
| TGME49_280570 | 2.08  | 6.81  | 6.59E-05 | 0.000342679 | SAG-related sequence SRS35A                         |
| TGME49_225680 | -2.84 | 5.66  | 6.60E-05 | 0.000342834 | hypothetical protein                                |
| TGME49_251850 | -1.52 | 7.02  | 6.60E-05 | 0.000342922 | serine/threonine protein phosphatase                |
| TGME49_252310 | -1.80 | 6.41  | 6.65E-05 | 0.000345113 | hypothetical protein                                |
| TGME49_284660 | -8.32 | 5.27  | 6.66E-05 | 0.00034551  | mitochondrial ribosomal protein s6-2, putative      |
| TGME49_261570 | -1.05 | 10.08 | 6.67E-05 | 0.000345631 | ribosomal protein RPL7A                             |
| TGME49_257710 | -3.55 | 5.56  | 6.68E-05 | 0.000345935 | actin-like protein ALP 5                            |
| TGME49_219800 | -1.05 | 8.18  | 6.71E-05 | 0.000347039 | vacuolar ATP synthase subunit b, putative           |
| TGME49_200430 | -8.32 | 4.89  | 6.82E-05 | 0.000352499 | cytidine and deoxycytidylate deaminase zinc-binding |
| TGME49_206320 | -1.23 | 6.96  | 6.88E-05 | 0.000355408 | hypothetical protein                                |
| TGME49_207770 | -1.29 | 7.77  | 6.88E-05 | 0.000355408 | PCI domain-containing protein                       |
| TGME49_236550 | -1.20 | 7.92  | 6.92E-05 | 0.000356461 | hypothetical protein                                |
| TGME49_314840 | -1.71 | 6.47  | 6.92E-05 | 0.000356461 | ubiquitin carboxyl-terminal hydrolase               |
| TGME49_267330 | -2.03 | 6.42  | 6.92E-05 | 0.000356461 | fumarate hydratase                                  |

|               |       |      |          |             |                                                      |
|---------------|-------|------|----------|-------------|------------------------------------------------------|
| TGME49_313240 | -2.92 | 5.84 | 6.95E-05 | 0.000357614 | ethylene-responsive RNA helicase, putative           |
| TGME49_235750 | -8.31 | 5.02 | 7.00E-05 | 0.000359762 | ULK kinase                                           |
| TGME49_254660 | 1.21  | 6.94 | 7.02E-05 | 0.000360594 | ankyrin repeat-containing protein                    |
| TGME49_202750 | -8.29 | 5.03 | 7.08E-05 | 0.000363064 | 3' exoribonuclease family, domain 1 domain-containi  |
| TGME49_318575 | -8.32 | 5.22 | 7.12E-05 | 0.000364863 | hypothetical protein                                 |
| TGME49_226270 | -2.89 | 5.82 | 7.13E-05 | 0.000365325 | hypothetical protein                                 |
| TGME49_255400 | 1.34  | 6.07 | 7.14E-05 | 0.000365517 | hypothetical protein                                 |
| TGME49_226330 | -8.33 | 4.87 | 7.28E-05 | 0.00037228  | hypothetical protein                                 |
| TGME49_228230 | 1.22  | 9.12 | 7.36E-05 | 0.000375886 | hypothetical protein                                 |
| TGME49_278960 | -1.71 | 6.55 | 7.38E-05 | 0.000376986 | hypothetical protein                                 |
| TGME49_271930 | -1.34 | 8.59 | 7.42E-05 | 0.000378509 | hypothetical protein                                 |
| TGME49_308940 | -8.29 | 4.89 | 7.46E-05 | 0.000380578 | hypothetical protein                                 |
| TGME49_238410 | -2.83 | 5.77 | 7.49E-05 | 0.000381523 | hypothetical protein                                 |
| TGME49_254200 | -8.32 | 4.78 | 7.50E-05 | 0.000381523 | anticodon binding domain-containing protein          |
| TGME49_271860 | -8.37 | 4.88 | 7.55E-05 | 0.000383689 | tRNA (Uracil-5-)-methyltransferase                   |
| TGME49_259850 | -8.28 | 5.08 | 7.58E-05 | 0.000384961 | hypothetical protein                                 |
| TGME49_252640 | 3.47  | 4.69 | 7.62E-05 | 0.000386462 | P-type ATPase PMA1                                   |
| TGME49_268910 | 1.34  | 5.89 | 7.69E-05 | 0.000389803 | signal peptidase I protein                           |
| TGME49_271810 | -1.16 | 7.84 | 7.70E-05 | 0.000389803 | lanp, putative                                       |
| TGME49_213600 | -8.29 | 5.17 | 7.71E-05 | 0.000390266 | hypothetical protein                                 |
| TGME49_315720 | -2.06 | 5.51 | 7.74E-05 | 0.000391307 | Smg-4/UPF3 family protein                            |
| TGME49_244570 | -8.31 | 4.81 | 7.76E-05 | 0.000392025 | hypothetical protein                                 |
| TGME49_217870 | 1.03  | 6.94 | 7.78E-05 | 0.000392699 | DHHC zinc finger domain-containing protein           |
| TGME49_278080 | 2.04  | 5.22 | 7.80E-05 | 0.000393159 | Toxoplasma gondii family A protein                   |
| TGME49_230860 | -2.24 | 6.09 | 7.82E-05 | 0.000394065 | hypothetical protein                                 |
| TGME49_312380 | -8.28 | 4.96 | 7.91E-05 | 0.000398104 | tetratricopeptide repeat-containing protein          |
| TGME49_223690 | -8.28 | 5.06 | 7.93E-05 | 0.000398664 | hypothetical protein                                 |
| TGME49_220208 | -8.29 | 4.78 | 8.02E-05 | 0.000403076 | hypothetical protein                                 |
| TGME49_242435 | -3.54 | 5.43 | 8.07E-05 | 0.000404514 | hypothetical protein                                 |
| TGME49_223125 | -2.03 | 6.12 | 8.36E-05 | 0.000418611 | ubiquitin family protein                             |
| TGME49_271170 | -3.53 | 5.26 | 8.38E-05 | 0.000419155 | dolichol kinase                                      |
| TGME49_257990 | -1.50 | 6.77 | 8.39E-05 | 0.000419675 | heat shock protein 101, putative                     |
| TGME49_290180 | 2.52  | 5.13 | 8.40E-05 | 0.00041983  | AP2 domain transcription factor AP2IX-6              |
| TGME49_204080 | -1.55 | 6.87 | 8.41E-05 | 0.000419845 | histidine acid phosphatase superfamily protein       |
| TGME49_236800 | -8.28 | 5.06 | 8.42E-05 | 0.000419845 | hypothetical protein                                 |
| TGME49_311380 | -3.97 | 5.26 | 8.43E-05 | 0.000420191 | hypothetical protein                                 |
| TGME49_291030 | -3.57 | 5.60 | 8.46E-05 | 0.000421618 | zinc finger, C3HC4 type (RING finger) domain-contain |
| TGME49_320460 | -3.51 | 5.29 | 8.58E-05 | 0.000427364 | ABC transporter transmembrane region domain-cont     |
| TGME49_249020 | -2.21 | 6.04 | 8.60E-05 | 0.000427694 | kinesin motor domain-containing protein              |
| TGME49_290640 | -1.52 | 7.98 | 8.62E-05 | 0.000428872 | DNA mismatch repair protein MSH6-1, putative         |
| TGME49_289140 | 1.35  | 6.44 | 8.67E-05 | 0.000430703 | ribosomal protein l22/l43, putative                  |
| TGME49_285990 | -3.59 | 5.64 | 8.69E-05 | 0.000431633 | Filamin/ABP280 repeat-containing protein             |
| TGME49_305920 | -3.50 | 5.44 | 8.76E-05 | 0.000434045 | endonuclease III family 1 protein                    |
| TGME49_263150 | -8.28 | 4.96 | 8.77E-05 | 0.00043454  | tetratricopeptide repeat-containing protein          |
| TGME49_309400 | -2.52 | 5.88 | 8.80E-05 | 0.000435286 | RecF/RecN/SMC N terminal domain-containing prote     |
| TGME49_220175 | 2.52  | 4.77 | 8.83E-05 | 0.0004366   | hypothetical protein                                 |
| TGME49_291140 | -1.02 | 8.46 | 9.09E-05 | 0.000448868 | CCR4-Not complex component, Not1 protein             |
| TGME49_315640 | 1.67  | 5.20 | 9.26E-05 | 0.000456237 | lipoyl(octanoyl) transferase                         |
| TGME49_278240 | -8.54 | 4.82 | 9.30E-05 | 0.000458329 | Zn-finger in Ran binding protein and others domain-c |
| TGME49_299000 | 1.03  | 6.82 | 9.35E-05 | 0.000459924 | hypothetical protein                                 |
| TGME49_320750 | 1.34  | 5.85 | 9.36E-05 | 0.000460024 | hypothetical protein                                 |
| TGME49_311090 | -1.25 | 7.32 | 9.46E-05 | 0.000464603 | ubiquitin carboxyl-terminal hydrolase                |
| TGME49_203740 | -1.93 | 6.73 | 9.46E-05 | 0.000464603 | hypothetical protein                                 |
| TGME49_227860 | -8.26 | 4.75 | 9.53E-05 | 0.00046706  | hypothetical protein                                 |
| TGME49_209270 | -8.33 | 5.06 | 9.63E-05 | 0.000472074 | hypothetical protein                                 |



|               |       |      |             |             |                                                            |
|---------------|-------|------|-------------|-------------|------------------------------------------------------------|
| TGME49_270760 | -8.29 | 4.79 | 9.70E-05    | 0.000474886 | asparagine synthase                                        |
| TGME49_264880 | -2.19 | 6.07 | 9.83E-05    | 0.000479671 | NEDD8-activating enzyme E1 catalytic subunit               |
| TGME49_250500 | -3.58 | 5.36 | 9.81E-05    | 0.000479671 | hypothetical protein                                       |
| TGME49_277550 | -8.26 | 4.87 | 9.83E-05    | 0.000479671 | UvrD/REP helicase domain-containing protein                |
| TGME49_218358 | -8.28 | 4.99 | 9.82E-05    | 0.000479671 | zinc knuckle domain-containing protein                     |
| TGME49_263410 | 5.23  | 5.00 | 9.85E-05    | 0.000479905 | scavenger receptor cysteine-rich domain-containing protein |
| TGME49_315690 | -3.51 | 5.51 | 9.85E-05    | 0.000479905 | DnaI domain-containing protein                             |
| TGME49_217050 | 1.06  | 7.26 | 9.89E-05    | 0.000481948 | ADA2-A transcriptional co-activator SAGA component         |
| TGME49_252190 | 1.94  | 6.80 | 9.95E-05    | 0.000484259 | KRUF family protein                                        |
| TGME49_257960 | -2.82 | 5.69 | 0.000101939 | 0.000494901 | GDP-D-mannose pyrophosphorylase                            |
| TGME49_318260 | -3.49 | 5.56 | 0.000101875 | 0.000494901 | transcription initiation factor TFIID subunit TAF5         |
| TGME49_232640 | 1.84  | 5.04 | 0.000102293 | 0.000495667 | RNA 2'-phosphotransferase, Tpt1/KptA family protein        |
| TGME49_215460 | -1.16 | 9.58 | 0.000102228 | 0.000495667 | ribosomal protein RPS24                                    |
| TGME49_243530 | -8.23 | 4.75 | 0.000102724 | 0.00049741  | pentatricopeptide repeat domain-containing protein         |
| TGME49_309580 | -2.79 | 5.70 | 0.000103372 | 0.000500219 | transporter, major facilitator family protein              |
| TGME49_216970 | -1.17 | 7.94 | 0.000104524 | 0.000505463 | coronin, putative                                          |
| TGME49_285650 | -1.41 | 6.83 | 0.000104719 | 0.000505965 | hypothetical protein                                       |
| TGME49_255690 | -2.81 | 5.59 | 0.000105115 | 0.000507322 | 2-C-methyl-D-erythritol 2,4-cyclodiphosphate synthase      |
| TGME49_251920 | 1.67  | 5.05 | 0.000105892 | 0.00051051  | hypothetical protein                                       |
| TGME49_216630 | -8.21 | 5.35 | 0.000105913 | 0.00051051  | trigger factor protein, putative                           |
| TGME49_267530 | 1.93  | 4.71 | 0.000106363 | 0.000512344 | hypothetical protein                                       |
| TGME49_243200 | -1.43 | 9.17 | 0.000106575 | 0.000513033 | hypothetical protein                                       |
| TGME49_262650 | -3.55 | 5.56 | 0.000106867 | 0.000514104 | WD domain, G-beta repeat-containing protein                |
| TGME49_222160 | -3.52 | 4.97 | 0.000107537 | 0.00051699  | aldehyde dehydrogenase                                     |
| TGME49_273850 | -2.77 | 5.77 | 0.000107683 | 0.000517353 | hypothetical protein                                       |
| TGME49_289290 | -1.62 | 7.07 | 0.000109026 | 0.000523467 | hypothetical protein                                       |
| TGME49_273920 | -2.42 | 6.00 | 0.000109239 | 0.000524149 | aldose reductase, putative                                 |
| TGME49_270160 | -8.21 | 4.78 | 0.000111063 | 0.000532209 | hypothetical protein                                       |
| TGME49_310360 | -1.33 | 7.41 | 0.000111759 | 0.0005352   | hypothetical protein                                       |
| TGME49_218820 | -1.39 | 8.78 | 0.000112155 | 0.000536749 | alba 2                                                     |
| TGME49_252065 | 2.13  | 5.06 | 0.00011281  | 0.000539532 | KRUF family protein                                        |
| TGME49_270150 | -2.79 | 5.78 | 0.000113211 | 0.000541098 | hypothetical protein                                       |
| TGME49_222840 | 1.67  | 8.70 | 0.000114672 | 0.000546466 | Ser/Thr phosphatase family protein                         |
| TGME49_253700 | 1.05  | 8.40 | 0.000114703 | 0.000546466 | transporter, major facilitator family protein              |
| TGME49_262550 | -8.21 | 4.87 | 0.000114599 | 0.000546466 | hypothetical protein                                       |
| TGME49_306290 | -1.91 | 6.40 | 0.000116284 | 0.00055364  | DNA-directed RNA polymerase III RPC1                       |
| TGME49_221370 | -3.47 | 5.30 | 0.000116882 | 0.000556129 | hypothetical protein                                       |
| TGME49_224580 | -1.73 | 6.71 | 0.000117388 | 0.000558178 | RNA recognition motif-containing protein                   |
| TGME49_310810 | -1.85 | 6.36 | 0.000118252 | 0.000561923 | apyrase                                                    |
| TGME49_268600 | -2.76 | 5.84 | 0.000118448 | 0.000562493 | DNA polymerase epsilon subunit B protein                   |
| TGME49_232210 | -8.23 | 5.03 | 0.00011874  | 0.00056352  | hypothetical protein                                       |
| TGME49_253600 | 1.71  | 6.68 | 0.000121159 | 0.000574263 | hypothetical protein                                       |
| TGME49_232000 | 1.15  | 8.49 | 0.000121821 | 0.000576768 | hypothetical protein                                       |
| TGME49_307650 | -1.55 | 6.35 | 0.000121844 | 0.000576768 | uracil-DNA glycosylase                                     |
| TGME49_225910 | 1.30  | 5.95 | 0.000122615 | 0.000579669 | hypothetical protein                                       |
| TGME49_284170 | -8.22 | 4.98 | 0.000122611 | 0.000579669 | DHHC zinc finger domain-containing protein                 |
| TGME49_226600 | -1.86 | 6.43 | 0.000123325 | 0.00058217  | syntaxin 5, putative                                       |
| TGME49_293050 | -2.81 | 5.54 | 0.000123378 | 0.00058217  | sybindin family protein                                    |
| TGME49_299010 | 2.76  | 6.43 | 0.00012422  | 0.000585393 | hypothetical protein                                       |
| TGME49_274150 | -3.51 | 5.45 | 0.000124212 | 0.000585393 | hypothetical protein                                       |
| TGME49_266890 | -1.47 | 6.92 | 0.000124398 | 0.000585861 | hypothetical protein                                       |
| TGME49_209860 | -8.20 | 5.15 | 0.000125041 | 0.000588512 | SRP40, C-terminal domain-containing protein                |
| TGME49_260310 | 1.61  | 5.29 | 0.000125894 | 0.000592152 | ATP-binding cassette transporter ABC.B1                    |
| TGME49_219300 | 1.38  | 5.66 | 0.000126022 | 0.000592375 | ran binding protein                                        |
| TGME49_210390 | -8.25 | 5.21 | 0.000127707 | 0.000599917 | WD domain, G-beta repeat-containing protein                |

|               |       |      |             |             |                                                      |
|---------------|-------|------|-------------|-------------|------------------------------------------------------|
| TGME49_288330 | -3.47 | 5.36 | 0.000128379 | 0.000602689 | histone lysine methyltransferase, SET, putative      |
| TGME49_310520 | -3.49 | 5.14 | 0.000129323 | 0.000606736 | 3'5'-cyclic nucleotide phosphodiesterase domain-con  |
| TGME49_306530 | -8.20 | 5.01 | 0.00012983  | 0.000608728 | hypothetical protein                                 |
| TGME49_252280 | -1.75 | 6.04 | 0.000130094 | 0.000609578 | hypothetical protein                                 |
| TGME49_204410 | -2.01 | 6.09 | 0.000131211 | 0.000614422 | endonuclease/exonuclease/phosphatase family prote    |
| TGME49_226560 | -3.45 | 5.49 | 0.000132301 | 0.000619056 | zinc finger (CCCH type) motif-containing protein     |
| TGME49_240830 | -8.19 | 4.70 | 0.000132368 | 0.000619056 | hydrolase, alpha/beta fold family protein            |
| TGME49_274000 | -2.41 | 6.01 | 0.000133318 | 0.000623107 | hypothetical protein                                 |
| TGME49_228980 | -8.20 | 5.06 | 0.000133436 | 0.000623263 | hypothetical protein                                 |
| TGME49_294390 | -8.18 | 5.02 | 0.000133929 | 0.00062517  | myosin light chain MLC4, putative                    |
| TGME49_309990 | 2.22  | 6.06 | 0.000134534 | 0.000627597 | hypothetical protein                                 |
| TGME49_215030 | -2.16 | 5.85 | 0.000134706 | 0.000628007 | hypothetical protein                                 |
| TGME49_288045 | -3.53 | 5.31 | 0.000134804 | 0.000628068 | hypothetical protein                                 |
| TGME49_219140 | -1.50 | 6.80 | 0.000135651 | 0.000631612 | EF-1 guanine nucleotide exchange domain-containing   |
| TGME49_319940 | -8.19 | 4.88 | 0.000138046 | 0.000641959 | hypothetical protein                                 |
| TGME49_252510 | 1.41  | 5.83 | 0.00013843  | 0.000643338 | hypothetical protein                                 |
| TGME49_297690 | 1.33  | 6.06 | 0.000139501 | 0.000647381 | hypothetical protein                                 |
| TGME49_204060 | -2.77 | 5.60 | 0.000139945 | 0.00064875  | SNARE domain-containing protein                      |
| TGME49_224670 | -2.14 | 5.88 | 0.000140898 | 0.000652756 | DnaJ domain-containing protein                       |
| TGME49_255740 | -2.80 | 5.77 | 0.00014254  | 0.000659535 | hypothetical protein                                 |
| TGME49_240220 | -1.35 | 6.59 | 0.000144499 | 0.000667765 | hypothetical protein                                 |
| TGME49_295060 | -8.17 | 4.82 | 0.000147726 | 0.000681827 | exonuclease                                          |
| TGME49_256030 | -1.04 | 7.94 | 0.000148348 | 0.000684272 | hypothetical protein                                 |
| TGME49_205730 | -2.76 | 5.43 | 0.00014974  | 0.000690259 | hypothetical protein                                 |
| TGME49_266970 | -2.77 | 5.89 | 0.000150616 | 0.000693864 | hypothetical protein                                 |
| TGME49_276910 | -1.45 | 6.62 | 0.00015166  | 0.000697806 | endoplasmic reticulum lumen protein retaining recep  |
| TGME49_295015 | 1.43  | 5.56 | 0.000153221 | 0.000704113 | patched family protein                               |
| TGME49_260640 | -2.13 | 5.79 | 0.00015354  | 0.000705139 | autophagy protein apg9 protein                       |
| TGME49_263290 | 2.59  | 6.06 | 0.000154087 | 0.000707213 | rhomboid protease ROM2                               |
| TGME49_209880 | -1.19 | 7.37 | 0.000154218 | 0.000707375 | glutamic acid-rcih protein, putative                 |
| TGME49_300010 | -8.20 | 4.88 | 0.000154655 | 0.000708729 | hypothetical protein                                 |
| TGME49_221585 | -8.19 | 5.10 | 0.000156864 | 0.000718173 | hypothetical protein                                 |
| TGME49_315700 | -2.75 | 5.81 | 0.000157396 | 0.000720166 | hypothetical protein                                 |
| TGME49_205570 | -2.75 | 5.58 | 0.000157787 | 0.000721508 | hypothetical protein                                 |
| TGME49_318410 | -1.14 | 7.53 | 0.000159588 | 0.000729293 | TCP-1 chaperonin, putative                           |
| TGME49_312340 | -8.15 | 5.02 | 0.000161737 | 0.000738198 | hypothetical protein                                 |
| TGME49_218800 | -8.20 | 4.77 | 0.000161923 | 0.000738594 | hypothetical protein                                 |
| TGME49_223070 | -1.16 | 7.72 | 0.000162405 | 0.000740332 | hypothetical protein                                 |
| TGME49_211720 | -1.07 | 9.35 | 0.000162875 | 0.00074195  | AP2 domain transcription factor AP2IV-5              |
| TGME49_308060 | -2.21 | 6.56 | 0.00016296  | 0.00074195  | hypothetical protein                                 |
| TGME49_253615 | 1.10  | 6.39 | 0.000163206 | 0.000742614 | hypothetical protein                                 |
| TGME49_246020 | -1.71 | 6.19 | 0.000163607 | 0.000743979 | SprT domain-containing protein                       |
| TGME49_240660 | -8.19 | 4.90 | 0.000164021 | 0.000745402 | hypothetical protein                                 |
| TGME49_307800 | 1.81  | 6.04 | 0.000164356 | 0.000746008 | GDA1/CD39 (nucleoside phosphatase) family protein    |
| TGME49_306210 | -8.28 | 5.06 | 0.000164311 | 0.000746008 | RNA polymerase II accessory factor CDC73             |
| TGME49_300130 | 1.92  | 4.71 | 0.000164851 | 0.000747074 | apical membrane antigen 1 domain-containing prote    |
| TGME49_297460 | -8.18 | 5.02 | 0.00016486  | 0.000747074 | hypothetical protein                                 |
| TGME49_202630 | -1.16 | 7.37 | 0.000165049 | 0.000747318 | ATP-dependent metalloproteinase HflB subfamily prot  |
| TGME49_271625 | -8.19 | 4.93 | 0.000165433 | 0.000748599 | serine--tRNA ligase                                  |
| TGME49_277070 | 1.30  | 5.84 | 0.000166584 | 0.000753345 | SWI2/SNF2-containing protein                         |
| TGME49_253330 | 2.26  | 8.28 | 0.000167159 | 0.000755485 | Rhoptry kinase family protein, truncated (incomplete |
| TGME49_230500 | -3.42 | 5.36 | 0.000168053 | 0.000758887 | hypothetical protein                                 |
| TGME49_255195 | 1.92  | 5.32 | 0.000168383 | 0.000759161 | hypothetical protein                                 |
| TGME49_217560 | 1.18  | 6.35 | 0.000168356 | 0.000759161 | DNA-directed RNA polymerase II RPB10                 |
| TGME49_201120 | -1.57 | 6.58 | 0.000168821 | 0.000760474 | ELMO/CED-12 family protein                           |

|               |       |      |             |             |                                                          |
|---------------|-------|------|-------------|-------------|----------------------------------------------------------|
| TGME49_227310 | -3.45 | 5.53 | 0.00016888  | 0.000760474 | hypothetical protein                                     |
| TGME49_264870 | 1.57  | 7.51 | 0.000170107 | 0.000765532 | Sodium:neurotransmitter symporter family protein         |
| TGME49_221922 | -3.47 | 5.27 | 0.000170294 | 0.000765909 | NifU family domain-containing protein                    |
| TGME49_204140 | -8.24 | 4.77 | 0.000170401 | 0.000765926 | PHD-finger domain-containing protein                     |
| TGME49_285950 | -8.19 | 5.02 | 0.00017134  | 0.000769208 | hypothetical protein                                     |
| TGME49_305540 | -1.62 | 6.49 | 0.000172601 | 0.000774399 | hypothetical protein                                     |
| TGME49_253490 | 1.80  | 7.37 | 0.000172952 | 0.000775504 | hypothetical protein                                     |
| TGME49_249890 | 1.64  | 5.11 | 0.000173295 | 0.000776102 | hypothetical protein                                     |
| TGME49_264030 | -1.66 | 6.63 | 0.00017325  | 0.000776102 | aminotransferase, putative                               |
| TGME49_253960 | 1.92  | 4.75 | 0.000174526 | 0.000781143 | oxidoreductase, short chain dehydrogenase/reductase      |
| TGME49_214900 | 1.01  | 7.26 | 0.000175195 | 0.00078366  | hypothetical protein                                     |
| TGME49_248830 | -1.37 | 6.55 | 0.000176126 | 0.000787351 | phosphoinositide phospholipase PIPLC                     |
| TGME49_291020 | -1.63 | 6.79 | 0.000177058 | 0.000791037 | myosin head (motor domain) domain-containing protein     |
| TGME49_268430 | -3.45 | 5.49 | 0.000177838 | 0.000794041 | hypothetical protein                                     |
| TGME49_313300 | 1.35  | 5.75 | 0.0001784   | 0.000795592 | YL1 nuclear protein C-terminal domain-containing protein |
| TGME49_249698 | -8.18 | 4.98 | 0.000178391 | 0.000795592 | hypothetical protein                                     |
| TGME49_205690 | 1.01  | 6.66 | 0.000178764 | 0.000796735 | hypothetical protein                                     |
| TGME49_202640 | -8.13 | 4.76 | 0.000179844 | 0.000800583 | RNA pseudouridine synthase superfamily protein           |
| TGME49_248640 | -1.23 | 7.36 | 0.000182701 | 0.00081281  | regulator of chromosome condensation (RCC1) repeat       |
| TGME49_267400 | -1.40 | 9.30 | 0.000184596 | 0.000819762 | ribosomal protein RPL32                                  |
| TGME49_207800 | -8.11 | 5.28 | 0.000186334 | 0.000826981 | hypothetical protein                                     |
| TGME49_243390 | -2.76 | 5.53 | 0.000186642 | 0.000827851 | hypothetical protein                                     |
| TGME49_223780 | -1.60 | 6.75 | 0.000186784 | 0.000827988 | hypothetical protein                                     |
| TGME49_248550 | -3.55 | 5.45 | 0.000188667 | 0.000835833 | SPX domain-containing protein                            |
| TGME49_270330 | 1.56  | 6.26 | 0.000189073 | 0.000837127 | cell-cycle-associated protein kinase, putative           |
| TGME49_290740 | -8.14 | 4.96 | 0.00018989  | 0.000840244 | hypothetical protein                                     |
| TGME49_260160 | 2.71  | 4.70 | 0.000190652 | 0.000843111 | hypothetical protein                                     |
| TGME49_275350 | -1.94 | 6.21 | 0.000193044 | 0.000852159 | TBC domain-containing protein                            |
| TGME49_301130 | -8.11 | 5.01 | 0.000195477 | 0.000862386 | hypothetical protein                                     |
| TGME49_260510 | -2.70 | 5.73 | 0.000196945 | 0.000867827 | ubiquitin thioesterase otubain-like family protein       |
| TGME49_318170 | 1.25  | 6.11 | 0.000198628 | 0.000874722 | hypothetical protein                                     |
| TGME49_314530 | -3.48 | 5.09 | 0.000199674 | 0.000878279 | RPAP1 family, C-terminal protein                         |
| TGME49_309160 | -1.94 | 6.33 | 0.000202064 | 0.000888267 | IgA-specific metalloendopeptidase                        |
| TGME49_239310 | -2.79 | 5.36 | 0.00020232  | 0.000888862 | ribulose 5-phosphate isomerase                           |
| TGME49_312840 | -1.83 | 6.43 | 0.000203043 | 0.000891507 | hypothetical protein                                     |
| TGME49_203290 | 1.50  | 8.25 | 0.000205658 | 0.000901918 | hypothetical protein                                     |
| TGME49_214800 | -8.10 | 4.74 | 0.000205613 | 0.000901918 | hypothetical protein                                     |
| TGME49_320015 | -8.10 | 4.68 | 0.00020868  | 0.000913547 | hypothetical protein                                     |
| TGME49_258850 | -8.13 | 4.82 | 0.000208901 | 0.000913972 | hypothetical protein                                     |
| TGME49_253410 | 1.99  | 6.01 | 0.000209335 | 0.00091533  | hypothetical protein                                     |
| TGME49_258180 | -8.18 | 4.82 | 0.000209515 | 0.000915574 | hypothetical protein                                     |
| TGME49_223040 | 1.49  | 7.86 | 0.000211333 | 0.000922975 | hypothetical protein                                     |
| TGME49_204350 | -1.93 | 5.92 | 0.000212281 | 0.000926022 | hypothetical protein                                     |
| TGME49_321640 | -1.84 | 6.09 | 0.000213356 | 0.000930163 | cell division protein CDC48AP                            |
| TGME49_265650 | -3.43 | 5.20 | 0.000214331 | 0.000933862 | protein phosphatase 2C domain-containing protein         |
| TGME49_210360 | 1.72  | 6.68 | 0.000214731 | 0.000935054 | DEAD (Asp-Glu-Ala-Asp) box polypeptide 41 family protein |
| TGME49_259000 | -8.10 | 4.76 | 0.000215278 | 0.000936885 | hypothetical protein                                     |
| TGME49_233090 | -8.10 | 4.99 | 0.000215767 | 0.00093846  | XPG N-terminal domain-containing protein                 |
| TGME49_243410 | -3.39 | 5.61 | 0.00021662  | 0.000941615 | tetratricopeptide repeat-containing protein              |
| TGME49_290940 | -1.28 | 7.21 | 0.000220608 | 0.000958386 | EMP/nonaspanin domain family protein                     |
| TGME49_248400 | -1.92 | 6.09 | 0.000221861 | 0.000963263 | glyoxalase I, putative                                   |
| TGME49_246130 | 1.26  | 8.21 | 0.000222375 | 0.000964932 | serpin (serine proteinase inhibitor) superfamily protein |
| TGME49_283800 | -1.99 | 6.25 | 0.000223495 | 0.000968654 | hypothetical protein                                     |
| TGME49_244470 | -1.10 | 7.80 | 0.000223748 | 0.000969181 | hypothetical protein                                     |
| TGME49_269770 | -2.73 | 5.57 | 0.000225293 | 0.000974733 | WD domain, G-beta repeat-containing protein              |

|               |       |      |             |             |                                                       |
|---------------|-------|------|-------------|-------------|-------------------------------------------------------|
| TGME49_308990 | -3.37 | 5.30 | 0.000228323 | 0.000986687 | transporter, solute:sodium symporter (SSS) family pr  |
| TGME49_293310 | 1.21  | 6.76 | 0.000228603 | 0.00098732  | ribosomal protein L20, putative                       |
| TGME49_237110 | -1.68 | 6.30 | 0.000231998 | 0.001000811 | replication factor C subunit 2, putative              |
| TGME49_284645 | -2.12 | 5.66 | 0.000232785 | 0.001003037 | hypothetical protein                                  |
| TGME49_218790 | -3.40 | 4.93 | 0.000232722 | 0.001003037 | elongation factor G C-terminus domain-containing pr   |
| TGME49_293770 | 1.29  | 8.02 | 0.000233202 | 0.00100425  | chitinase-like protein CLP1                           |
| TGME49_309920 | -3.37 | 5.24 | 0.000236152 | 0.001015177 | hypothetical protein                                  |
| TGME49_202080 | -8.07 | 4.81 | 0.000237399 | 0.001019945 | hypothetical protein                                  |
| TGME49_265850 | 1.76  | 6.27 | 0.000238209 | 0.00102283  | hypothetical protein                                  |
| TGME49_270940 | -8.13 | 4.93 | 0.000238856 | 0.00102442  | hypothetical protein                                  |
| TGME49_285272 | -8.13 | 4.73 | 0.000238781 | 0.00102442  | hypothetical protein                                  |
| TGME49_307010 | 1.66  | 6.89 | 0.000242059 | 0.001035755 | histone lysine demethylase JMJC1/KDM5D/JARID1D        |
| TGME49_316230 | -2.08 | 6.16 | 0.000241977 | 0.001035755 | SAC1 phosphoinositide phosphatase, putative           |
| TGME49_306020 | -1.68 | 6.20 | 0.000242619 | 0.001037551 | hypothetical protein                                  |
| TGME49_247700 | 1.14  | 8.30 | 0.000244314 | 0.001044161 | AP2 domain transcription factor AP2XII-4              |
| TGME49_278920 | -2.72 | 5.87 | 0.000244447 | 0.001044161 | hypothetical protein                                  |
| TGME49_263330 | -8.17 | 4.96 | 0.000245096 | 0.001046326 | Adaptin ear-binding coat-associated protein 2 (NECA   |
| TGME49_255890 | -2.68 | 5.76 | 0.000250528 | 0.001067669 | pyridine nucleotide-disulfide oxidoreductase domain   |
| TGME49_305600 | -8.06 | 4.82 | 0.000251371 | 0.001070644 | hypothetical protein                                  |
| TGME49_255300 | -1.61 | 6.62 | 0.000254255 | 0.001082306 | hypothetical protein                                  |
| TGME49_297760 | -8.05 | 5.12 | 0.000255197 | 0.001085686 | hypothetical protein                                  |
| TGME49_208440 | 1.14  | 7.83 | 0.00025672  | 0.001091541 | hypothetical protein                                  |
| TGME49_253320 | -8.05 | 4.96 | 0.000257058 | 0.001092348 | hypothetical protein                                  |
| TGME49_239080 | -8.07 | 4.71 | 0.000257715 | 0.001094513 | carrier superfamily protein                           |
| TGME49_248130 | -8.09 | 4.76 | 0.000263052 | 0.001115897 | hypothetical protein                                  |
| TGME49_315420 | 1.37  | 5.70 | 0.000263712 | 0.001118054 | hypothetical protein                                  |
| TGME49_288570 | -2.66 | 5.83 | 0.000264138 | 0.001119219 | hypothetical protein                                  |
| TGME49_253540 | 1.51  | 5.28 | 0.000265724 | 0.001125294 | hypothetical protein                                  |
| TGME49_268750 | -3.38 | 5.37 | 0.000268453 | 0.001136199 | peptidyl-prolyl cis-trans isomerase E, putative       |
| TGME49_310590 | 1.36  | 5.32 | 0.000269039 | 0.001138029 | hypothetical protein                                  |
| TGME49_227050 | -3.36 | 5.12 | 0.000269927 | 0.001141134 | ATPase/histidine kinase/DNA gyrase B/HSP90 domain     |
| TGME49_249410 | -2.13 | 6.04 | 0.00027129  | 0.001144928 | hypothetical protein                                  |
| TGME49_311625 | -2.07 | 5.92 | 0.000272424 | 0.001148404 | WD domain, G-beta repeat-containing protein           |
| TGME49_226900 | 1.23  | 6.03 | 0.000273704 | 0.001153144 | hypothetical protein                                  |
| TGME49_220920 | -8.04 | 4.78 | 0.000275661 | 0.001160728 | hypothetical protein                                  |
| TGME49_309250 | -1.54 | 6.68 | 0.000277868 | 0.001168086 | hypothetical protein                                  |
| TGME49_217760 | 1.31  | 5.84 | 0.000279889 | 0.001175185 | GTP-binding protein                                   |
| TGME49_218250 | -2.10 | 6.10 | 0.000282413 | 0.001183764 | TAP42 family protein                                  |
| TGME49_223480 | -8.02 | 5.77 | 0.000287088 | 0.001201316 | sushi domain (scr repeat) domain-containing protein   |
| TGME49_214520 | 1.30  | 5.70 | 0.000287489 | 0.001202317 | general transcription factor IIH polypeptide 4 GTF2H4 |
| TGME49_215380 | -3.38 | 5.25 | 0.000287714 | 0.001202578 | hypothetical protein                                  |
| TGME49_263820 | -1.71 | 6.28 | 0.00028878  | 0.001206351 | DEAD/DEAH box helicase domain-containing protein      |
| TGME49_251410 | -1.71 | 6.67 | 0.000288955 | 0.001206401 | tetratricopeptide repeat-containing protein           |
| TGME49_313360 | 1.10  | 6.20 | 0.000291851 | 0.001216428 | hypothetical protein                                  |
| TGME49_313140 | 1.34  | 8.23 | 0.000292036 | 0.001216517 | isocitrate dehydrogenase                              |
| TGME49_204550 | -2.70 | 5.62 | 0.000292342 | 0.001217103 | hypothetical protein                                  |
| TGME49_223560 | -2.75 | 5.14 | 0.000292682 | 0.001217834 | hypothetical protein                                  |
| TGME49_306390 | -1.05 | 7.63 | 0.000293013 | 0.001217841 | hypothetical protein                                  |
| TGME49_319720 | -3.43 | 5.17 | 0.000293002 | 0.001217841 | hypothetical protein                                  |
| TGME49_321550 | 1.04  | 6.54 | 0.00029391  | 0.001220884 | hypothetical protein                                  |
| TGME49_216240 | -1.76 | 6.30 | 0.000294279 | 0.001221728 | hypothetical protein                                  |
| TGME49_286010 | 1.40  | 5.83 | 0.000298452 | 0.001236971 | hypothetical protein                                  |
| TGME49_270450 | -8.04 | 4.74 | 0.000298361 | 0.001236971 | MCM2/3/5 family protein                               |
| TGME49_316150 | -1.76 | 5.95 | 0.000299076 | 0.00123886  | ULK kinase                                            |
| TGME49_263510 | -1.51 | 6.36 | 0.000303754 | 0.001254726 | Spc97 / Spc98 family protein                          |

|               |       |      |             |             |                                                         |
|---------------|-------|------|-------------|-------------|---------------------------------------------------------|
| TGME49_257480 | -2.42 | 6.03 | 0.000305006 | 0.001259191 | NADP-dependent succinate-semialdehyde dehydrogenase     |
| TGME49_277220 | 1.44  | 5.47 | 0.000306953 | 0.001266522 | hypothetical protein                                    |
| TGME49_232960 | -1.60 | 6.61 | 0.00030841  | 0.001271115 | oxidoreductase, 2OG-Fe(II) oxygenase family protein     |
| TGME49_264752 | -3.41 | 5.23 | 0.000308766 | 0.001271873 | HEAT repeat-containing protein                          |
| TGME49_227910 | -1.06 | 7.80 | 0.000309643 | 0.00127407  | hypothetical protein                                    |
| TGME49_309050 | -8.05 | 4.88 | 0.000311184 | 0.001279696 | hypothetical protein                                    |
| TGME49_239600 | -2.30 | 5.29 | 0.000313382 | 0.001287304 | rhoptry kinase family protein ROP23 (incomplete cat     |
| TGME49_311080 | -1.92 | 5.91 | 0.000315733 | 0.00129624  | transporter, cation channel family protein              |
| TGME49_276990 | -3.32 | 5.48 | 0.000316891 | 0.001300272 | cytochrome b5 family heme/steroid binding domain-       |
| TGME49_232320 | -8.04 | 4.97 | 0.000318507 | 0.001305454 | hypothetical protein                                    |
| TGME49_288620 | 1.03  | 6.86 | 0.00032026  | 0.001311914 | Erv1 / Alr family protein                               |
| TGME49_316360 | -3.41 | 5.40 | 0.000321474 | 0.001316156 | hypothetical protein                                    |
| TGME49_267700 | -3.35 | 5.07 | 0.000323394 | 0.001321558 | hypothetical protein                                    |
| TGME49_240710 | -1.70 | 6.51 | 0.00032431  | 0.001323455 | RNA recognition motif-containing protein                |
| TGME49_289100 | -1.72 | 6.51 | 0.000325341 | 0.001326844 | hypothetical protein                                    |
| TGME49_246060 | -8.09 | 5.11 | 0.000325846 | 0.001328173 | DNA-dependent RNA polymerase                            |
| TGME49_313418 | -8.06 | 5.19 | 0.000326504 | 0.001330123 | hypothetical protein                                    |
| TGME49_290310 | -2.05 | 5.87 | 0.000328579 | 0.001337251 | hypothetical protein                                    |
| TGME49_277490 | 1.26  | 7.63 | 0.000329892 | 0.001341708 | hypothetical protein                                    |
| TGME49_226090 | -3.35 | 5.05 | 0.000330111 | 0.00134186  | DEAD/DEAH box helicase domain-containing protein        |
| TGME49_262500 | -1.33 | 7.01 | 0.000331723 | 0.001347672 | hypothetical protein                                    |
| TGME49_271770 | -2.65 | 5.22 | 0.000334604 | 0.001357883 | hypothetical protein                                    |
| TGME49_257370 | 1.96  | 5.96 | 0.000335058 | 0.001358979 | hypothetical protein                                    |
| TGME49_219130 | -1.87 | 5.89 | 0.000335375 | 0.001359088 | NADPH-glutathione reductase                             |
| TGME49_220110 | 1.56  | 5.05 | 0.000339559 | 0.001373669 | hypothetical protein                                    |
| TGME49_278160 | -3.38 | 5.32 | 0.000339609 | 0.001373669 | vesicle transport v-snare protein                       |
| TGME49_285660 | -2.12 | 5.85 | 0.000340956 | 0.001378364 | DEAD/DEAH box helicase domain-containing protein        |
| TGME49_214280 | -8.13 | 4.76 | 0.000341237 | 0.001378745 | phosphoadenosine phosphosulfate reductase family        |
| TGME49_248110 | 1.41  | 7.91 | 0.000341878 | 0.001380583 | hypothetical protein                                    |
| TGME49_268620 | -8.00 | 4.67 | 0.000345112 | 0.001390603 | blood stage antigen 41-3 precursor, putative            |
| TGME49_271110 | -3.33 | 5.21 | 0.000345474 | 0.001391303 | hypothetical protein                                    |
| TGME49_273550 | -3.34 | 5.26 | 0.000345853 | 0.001392074 | hypothetical protein                                    |
| TGME49_226060 | 1.40  | 6.99 | 0.000346473 | 0.001393809 | transmembrane amino acid transporter protein            |
| TGME49_266390 | -8.00 | 4.86 | 0.000347987 | 0.001399139 | DNA mismatch repair protein, C-terminal domain-con      |
| TGME49_271000 | -2.15 | 5.98 | 0.000350905 | 0.001409336 | hypothetical protein                                    |
| TGME49_208820 | -3.36 | 5.82 | 0.000353282 | 0.001418114 | 1-deoxy-D-xylulose-5-phosphate synthase                 |
| TGME49_213635 | 2.19  | 5.25 | 0.000355085 | 0.001424577 | hypothetical protein                                    |
| TGME49_221260 | 1.13  | 6.11 | 0.000362301 | 0.001451955 | Class-II DAHP synthetase family protein                 |
| TGME49_235740 | -3.29 | 5.69 | 0.000362721 | 0.001452851 | hypothetical protein                                    |
| TGME49_318460 | -1.48 | 6.53 | 0.00036748  | 0.001470317 | P-type ATPase of unknown pump specificity (type V)      |
| TGME49_258990 | -2.65 | 5.52 | 0.000370568 | 0.001480271 | bromodomain-containing protein                          |
| TGME49_209610 | 1.15  | 6.54 | 0.000373886 | 0.001491887 | oocyst wall protein OWP2                                |
| TGME49_280720 | -7.98 | 5.01 | 0.000374269 | 0.001491887 | hypothetical protein                                    |
| TGME49_209460 | -8.00 | 4.82 | 0.000378222 | 0.001506776 | hypothetical protein                                    |
| TGME49_288560 | -1.61 | 6.49 | 0.0003798   | 0.001512246 | hypothetical protein                                    |
| TGME49_311780 | -1.84 | 5.75 | 0.000380176 | 0.00151293  | Zn-containing alcohol dehydrogenase                     |
| TGME49_234900 | -1.30 | 7.62 | 0.000382204 | 0.001520183 | PHD-finger domain-containing protein                    |
| TGME49_270530 | -2.36 | 5.98 | 0.000384911 | 0.001527662 | ubiquitin fusion degradation protein UFD1CY             |
| TGME49_236280 | 1.77  | 4.85 | 0.000389479 | 0.001543305 | hypothetical protein                                    |
| TGME49_226660 | -1.22 | 7.06 | 0.000396487 | 0.001568654 | hypothetical protein                                    |
| TGME49_205720 | -8.02 | 4.68 | 0.000396513 | 0.001568654 | Adenosine/AMP deaminase domain-containing prote         |
| TGME49_211230 | -1.40 | 6.73 | 0.00039843  | 0.001575398 | eukaryotic initiation factor-2B, alpha subunit, putativ |
| TGME49_201230 | -2.62 | 5.61 | 0.000398736 | 0.001575764 | kinesin motor domain-containing protein                 |
| TGME49_246178 | -2.02 | 5.82 | 0.000401739 | 0.001586782 | hypothetical protein                                    |
| TGME49_285840 | 1.36  | 6.34 | 0.000405937 | 0.001602508 | RAP domain-containing protein                           |

|               |       |       |             |             |                                                      |
|---------------|-------|-------|-------------|-------------|------------------------------------------------------|
| TGME49_248740 | 1.20  | 8.77  | 0.000406937 | 0.001605598 | hypothetical protein                                 |
| TGME49_269885 | -1.06 | 8.06  | 0.000411891 | 0.001623412 | rhoptry metalloprotease toxolysin TLN1               |
| TGME49_294720 | -2.34 | 5.83  | 0.000412977 | 0.001626825 | hypothetical protein                                 |
| TGME49_277010 | -8.00 | 4.90  | 0.000416444 | 0.001639608 | Fe-S metabolism associated domain-containing prote   |
| TGME49_207665 | -7.99 | 4.98  | 0.000419803 | 0.001651077 | kinesin motor domain-containing protein              |
| TGME49_230080 | -2.25 | 5.55  | 0.000421646 | 0.001656563 | DEAD/DEAH box helicase domain-containing protein     |
| TGME49_320480 | -1.14 | 6.98  | 0.000422399 | 0.00165864  | Rab11b                                               |
| TGME49_289670 | 1.85  | 4.94  | 0.000422861 | 0.00165869  | DNA repair metallo-beta-lactamase                    |
| TGME49_268730 | 1.39  | 5.50  | 0.000423229 | 0.001659255 | glutaredoxin-related protein                         |
| TGME49_315760 | -1.17 | 6.89  | 0.000434231 | 0.001699317 | AP2 domain transcription factor AP2XI-4              |
| TGME49_319570 | -1.66 | 6.69  | 0.000434437 | 0.001699317 | WD domain, G-beta repeat-containing protein          |
| TGME49_233310 | -3.28 | 5.31  | 0.000434597 | 0.001699317 | peptidase D, putative                                |
| TGME49_244130 | -1.54 | 6.36  | 0.00043879  | 0.0017139   | hypothetical protein                                 |
| TGME49_218370 | -2.02 | 5.98  | 0.000438722 | 0.0017139   | hypothetical protein                                 |
| TGME49_240960 | 2.00  | 7.06  | 0.000445619 | 0.001739654 | AIG2 family protein                                  |
| TGME49_306910 | -1.84 | 6.36  | 0.000447866 | 0.001747505 | hypothetical protein                                 |
| TGME49_231380 | 1.20  | 6.20  | 0.000451836 | 0.001762067 | DNA-directed RNA polymerase II RPB4                  |
| TGME49_209120 | 1.35  | 6.06  | 0.000453681 | 0.001766589 | hypothetical protein                                 |
| TGME49_295610 | -1.14 | 7.21  | 0.000453713 | 0.001766589 | histone lysine methyltransferase, SET, putative      |
| TGME49_256090 | -7.95 | 4.73  | 0.000454164 | 0.001767413 | glycerophosphodiester phosphodiesterase family pro   |
| TGME49_238230 | -2.62 | 5.73  | 0.000455303 | 0.001770917 | Ser/Thr phosphatase family protein                   |
| TGME49_312905 | -1.52 | 7.21  | 0.000456525 | 0.001774734 | hypothetical protein                                 |
| TGME49_222100 | -1.23 | 6.78  | 0.000457355 | 0.001775525 | hypothetical protein                                 |
| TGME49_310300 | -2.61 | 5.65  | 0.000456973 | 0.001775525 | hypothetical protein                                 |
| TGME49_208722 | -3.32 | 5.29  | 0.000460704 | 0.001787221 | hypothetical protein                                 |
| TGME49_228720 | -7.93 | 4.72  | 0.000462857 | 0.001793693 | hypothetical protein                                 |
| TGME49_233340 | -2.04 | 6.12  | 0.000463244 | 0.001794251 | hypothetical protein                                 |
| TGME49_226970 | 1.03  | 10.38 | 0.000466296 | 0.001804183 | ribosomal protein RPS11                              |
| TGME49_270190 | -2.74 | 5.63  | 0.000466811 | 0.001805231 | protein phosphatase 2C domain-containing protein     |
| TGME49_251885 | -7.96 | 5.07  | 0.000469397 | 0.001813334 | hypothetical protein                                 |
| TGME49_291010 | 1.83  | 5.14  | 0.000469794 | 0.001813335 | hypothetical protein                                 |
| TGME49_278470 | -3.38 | 5.56  | 0.000469888 | 0.001813335 | hypothetical protein                                 |
| TGME49_203970 | -2.59 | 5.54  | 0.000470781 | 0.001815834 | dolichyl-diphosphooligosaccharide--protein glycosylt |
| TGME49_229340 | -7.92 | 4.88  | 0.000473982 | 0.001826275 | hypothetical protein                                 |
| TGME49_280770 | -1.02 | 7.52  | 0.000478593 | 0.001843082 | regulator of chromosome condensation (RCC1) repea    |
| TGME49_269130 | -7.92 | 4.83  | 0.000479109 | 0.001844107 | hypothetical protein                                 |
| TGME49_261710 | -1.46 | 6.65  | 0.000482086 | 0.001854221 | ankyrin repeat-containing protein                    |
| TGME49_264210 | 1.37  | 5.57  | 0.000484852 | 0.001859437 | hypothetical protein                                 |
| TGME49_299970 | -1.03 | 8.14  | 0.000484468 | 0.001859437 | tetratricopeptide repeat-containing protein          |
| TGME49_212735 | -2.65 | 5.29  | 0.000484711 | 0.001859437 | hypothetical protein                                 |
| TGME49_318590 | -7.96 | 4.79  | 0.000489192 | 0.001875109 | MRP family domain-containing protein                 |
| TGME49_221280 | -1.31 | 6.77  | 0.000491565 | 0.001882254 | hypothetical protein                                 |
| TGME49_246978 | -3.26 | 5.07  | 0.000493292 | 0.001887887 | hypothetical protein                                 |
| TGME49_294250 | -1.84 | 6.17  | 0.000495626 | 0.001895842 | WD domain, G-beta repeat-containing protein          |
| TGME49_294705 | -7.95 | 5.03  | 0.0004988   | 0.001906996 | hypothetical protein                                 |
| TGME49_225110 | 1.07  | 6.39  | 0.000502278 | 0.001917318 | AP2 domain transcription factor AP2X-2               |
| TGME49_215260 | -1.22 | 7.22  | 0.000503956 | 0.001922273 | carbamoylphosphate synthetase                        |
| TGME49_293060 | -1.75 | 6.24  | 0.000504876 | 0.001924254 | SPRY domain-containing protein                       |
| TGME49_245475 | 1.46  | 5.26  | 0.000506978 | 0.001930275 | hypothetical protein                                 |
| TGME49_203358 | -3.26 | 5.46  | 0.00050674  | 0.001930275 | hypothetical protein                                 |
| TGME49_313860 | 1.64  | 7.16  | 0.000509615 | 0.001939316 | regulator of chromosome condensation (RCC1) repea    |
| TGME49_281675 | 1.68  | 4.86  | 0.000513199 | 0.001950169 | protein kinase, putative                             |
| TGME49_207830 | 1.11  | 6.32  | 0.000513258 | 0.001950169 | MORN repeat-containing protein                       |
| TGME49_268870 | -1.11 | 7.46  | 0.000516042 | 0.00195836  | tetratricopeptide repeat-containing protein          |
| TGME49_294860 | -1.71 | 6.13  | 0.000516208 | 0.00195836  | hypothetical protein                                 |

|               |       |       |             |             |                                                                      |
|---------------|-------|-------|-------------|-------------|----------------------------------------------------------------------|
| TGME49_244720 | -3.24 | 5.51  | 0.000520078 | 0.001972029 | hypothetical protein                                                 |
| TGME49_258680 | -1.83 | 6.21  | 0.00052291  | 0.001978708 | TATA-box binding protein TBP2                                        |
| TGME49_272270 | -7.90 | 4.79  | 0.000522859 | 0.001978708 | radical SAM domain-containing protein                                |
| TGME49_255960 | -1.45 | 6.58  | 0.00052516  | 0.001986206 | hypothetical protein                                                 |
| TGME49_312280 | -1.31 | 6.89  | 0.000525856 | 0.001987821 | pre-mRNA-splicing factor ATP-dependent RNA helicase                  |
| TGME49_263130 | 1.21  | 8.10  | 0.000528821 | 0.001996986 | citrate synthase, putative                                           |
| TGME49_212725 | -2.24 | 5.73  | 0.000533916 | 0.0020152   | hypothetical protein                                                 |
| TGME49_267560 | 1.64  | 5.89  | 0.000541805 | 0.002041847 | folate-binding protein YgfZ protein                                  |
| TGME49_202680 | -1.16 | 8.26  | 0.000546695 | 0.002055041 | peptidase M16, alpha subunit, putative                               |
| TGME49_220440 | -2.04 | 5.93  | 0.000547511 | 0.002057061 | cyclin-dependent kinase regulatory subunit protein                   |
| TGME49_207940 | -3.27 | 5.31  | 0.000551324 | 0.002070336 | ribosomal protein S9, putative                                       |
| TGME49_246040 | -1.69 | 6.20  | 0.000553393 | 0.002077049 | MIF4G domain-containing protein                                      |
| TGME49_251480 | 1.95  | 5.55  | 0.000554925 | 0.002081741 | DEAD/DEAH box helicase domain-containing protein                     |
| TGME49_203620 | -3.25 | 5.21  | 0.000564518 | 0.002111425 | hypothetical protein                                                 |
| TGME49_222120 | -3.23 | 5.09  | 0.00056585  | 0.002115215 | hypothetical protein                                                 |
| TGME49_257170 | -3.23 | 5.13  | 0.00056717  | 0.002119077 | hypothetical protein                                                 |
| TGME49_220160 | -3.23 | 5.04  | 0.000569553 | 0.002126908 | WD domain-containing protein                                         |
| TGME49_243790 | -1.82 | 5.96  | 0.000571675 | 0.002133752 | SAG-related sequence SRS33                                           |
| TGME49_293840 | 1.05  | 6.85  | 0.00057796  | 0.002155036 | hypothetical protein                                                 |
| TGME49_216760 | -7.92 | 4.80  | 0.000578718 | 0.002156774 | RNA pseudouridine synthase superfamily protein                       |
| TGME49_214940 | 1.07  | 10.53 | 0.000588519 | 0.00218889  | MIC2-associated protein M2AP                                         |
| TGME49_213420 | -7.88 | 4.75  | 0.00059018  | 0.002192861 | RAP domain-containing protein                                        |
| TGME49_266930 | 1.45  | 5.42  | 0.000591526 | 0.002196757 | general transcription factor IIH polypeptide 3 GTF2H3                |
| TGME49_236780 | -3.23 | 5.28  | 0.00059879  | 0.002221502 | zinc finger, C3HC4 type (RING finger) domain-containing protein      |
| TGME49_224810 | -3.46 | 5.52  | 0.000600175 | 0.002225525 | hypothetical protein                                                 |
| TGME49_232980 | 1.64  | 5.06  | 0.000602656 | 0.002232486 | hypothetical protein                                                 |
| TGME49_271200 | -1.34 | 6.92  | 0.000607768 | 0.002250295 | AP2 domain transcription factor AP2VIII-5                            |
| TGME49_317705 | -1.73 | 6.25  | 0.000613563 | 0.002270614 | enoyl-CoA hydratase/isomerase family protein                         |
| TGME49_242810 | -3.25 | 5.22  | 0.000615878 | 0.00227804  | hypothetical protein                                                 |
| TGME49_262880 | -1.50 | 6.33  | 0.000619047 | 0.002288615 | hypothetical protein                                                 |
| TGME49_214470 | -2.20 | 5.61  | 0.000619804 | 0.002290269 | Ulp1 protease family, C-terminal catalytic domain-containing protein |
| TGME49_240890 | -1.06 | 7.45  | 0.000622544 | 0.002299244 | 6-phosphofructokinase                                                |
| TGME49_225310 | -1.18 | 6.93  | 0.00063062  | 0.00232675  | ARF1-directed GTPase-activating protein, putative                    |
| TGME49_320100 | -1.06 | 8.20  | 0.000631208 | 0.002327758 | RNA recognition motif-containing protein                             |
| TGME49_272320 | 1.24  | 5.67  | 0.000631908 | 0.002328014 | DHHC zinc finger domain-containing protein                           |
| TGME49_262390 | -1.58 | 6.20  | 0.000633316 | 0.002332039 | TLD protein                                                          |
| TGME49_299050 | 1.05  | 10.43 | 0.000634762 | 0.002333879 | ribosomal protein RPL17                                              |
| TGME49_311280 | -7.86 | 4.70  | 0.000640184 | 0.002352645 | hypothetical protein                                                 |
| TGME49_218955 | 1.39  | 5.19  | 0.000646753 | 0.002375605 | hypothetical protein                                                 |
| TGME49_205625 | -3.24 | 5.09  | 0.000651867 | 0.00239201  | hypothetical protein                                                 |
| TGME49_289510 | 1.20  | 5.65  | 0.000652817 | 0.002394191 | hypothetical protein                                                 |
| TGME49_312220 | -3.23 | 5.27  | 0.000653108 | 0.002394191 | mitochondrial inner membrane translocase subunit TIM22               |
| TGME49_278130 | -1.77 | 6.84  | 0.000654797 | 0.002399193 | hypothetical protein                                                 |
| TGME49_291690 | -3.21 | 5.09  | 0.000657489 | 0.002407862 | hypothetical protein                                                 |
| TGME49_239300 | -1.58 | 6.35  | 0.000663374 | 0.002427012 | hypothetical protein                                                 |
| TGME49_202410 | -1.62 | 6.11  | 0.000664821 | 0.002431102 | hypothetical protein                                                 |
| TGME49_307040 | -1.31 | 6.89  | 0.000665746 | 0.002432078 | shikimate dehydrogenase substrate binding domain-containing protein  |
| TGME49_273970 | -3.20 | 5.02  | 0.00066834  | 0.002439202 | CorA family Mg <sup>2+</sup> transporter protein                     |
| TGME49_262120 | -1.20 | 7.00  | 0.000669564 | 0.002442405 | IQ calmodulin-binding motif domain-containing protein                |
| TGME49_281450 | -2.60 | 5.45  | 0.000675588 | 0.00246195  | cell-cycle-associated protein kinase, putative                       |
| TGME49_227390 | -2.55 | 5.44  | 0.000682111 | 0.002480983 | hypothetical protein                                                 |
| TGME49_229290 | -7.86 | 4.73  | 0.000682833 | 0.002482234 | kelch repeat-containing protein                                      |
| TGME49_249600 | -7.86 | 4.74  | 0.000683793 | 0.002484503 | hypothetical protein                                                 |
| TGME49_258920 | -7.87 | 4.81  | 0.000686305 | 0.002491182 | hypothetical protein                                                 |
| TGME49_314970 | -1.13 | 7.24  | 0.000688199 | 0.002496832 | root hair defective 3 gtp-binding protein (rh3) protein              |

|               |       |      |             |             |                                                       |
|---------------|-------|------|-------------|-------------|-------------------------------------------------------|
| TGME49_294980 | 1.48  | 6.35 | 0.000691272 | 0.002505521 | hypothetical protein                                  |
| TGME49_246730 | 1.38  | 6.92 | 0.000692853 | 0.002510022 | hypothetical protein                                  |
| TGME49_281650 | -1.66 | 5.97 | 0.000696638 | 0.002521264 | hypothetical protein                                  |
| TGME49_224150 | -7.83 | 4.83 | 0.00070555  | 0.002548528 | hypothetical protein                                  |
| TGME49_250830 | -1.24 | 7.32 | 0.000706257 | 0.002549837 | SAC3/GANP family protein                              |
| TGME49_203480 | -3.25 | 5.11 | 0.000707316 | 0.002552411 | hypothetical protein                                  |
| TGME49_315590 | -1.95 | 5.93 | 0.000722613 | 0.002602534 | macro domain-containing protein                       |
| TGME49_235700 | -1.43 | 6.40 | 0.000723689 | 0.00260514  | sedoheptulose-1,7-bisphosphatase                      |
| TGME49_299110 | -1.81 | 6.49 | 0.000730789 | 0.002629418 | cleft lip and palate transmembrane protein 1 (clptm1  |
| TGME49_233820 | -7.82 | 4.93 | 0.000735721 | 0.002644589 | DNA polymerase epsilon subunit B protein              |
| TGME49_258350 | 1.36  | 5.57 | 0.000737184 | 0.002646856 | hypothetical protein                                  |
| TGME49_250670 | 1.04  | 6.89 | 0.000737109 | 0.002646856 | hypothetical protein                                  |
| TGME49_224490 | -3.25 | 5.05 | 0.000739876 | 0.002654362 | polyprenyl synthetase superfamily protein             |
| TGME49_263360 | -1.96 | 5.69 | 0.000742252 | 0.002660305 | WD domain, G-beta repeat-containing protein           |
| TGME49_311890 | -1.06 | 7.36 | 0.000760976 | 0.002723453 | hypothetical protein                                  |
| TGME49_306540 | 1.22  | 5.76 | 0.00076783  | 0.002745326 | phosphotransferase enzyme family protein              |
| TGME49_309190 | 1.05  | 6.72 | 0.00077761  | 0.002777608 | hypothetical protein                                  |
| TGME49_265380 | -1.96 | 5.88 | 0.000782457 | 0.002792223 | tetratricopeptide repeat (TPR)-/ U-box domain-conta   |
| TGME49_246800 | -1.35 | 6.81 | 0.000784268 | 0.002795987 | acylaminoacyl-peptidase, putative                     |
| TGME49_320005 | -3.18 | 5.20 | 0.000785528 | 0.00279913  | hypothetical protein                                  |
| TGME49_260520 | 1.24  | 7.70 | 0.000790282 | 0.002813359 | hypothetical protein                                  |
| TGME49_280522 | -1.27 | 6.97 | 0.000791553 | 0.002816527 | hypothetical protein                                  |
| TGME49_223668 | 1.55  | 5.19 | 0.00079477  | 0.002825254 | LYAR-type C2HC zinc finger protein                    |
| TGME49_221360 | -1.98 | 5.89 | 0.000795472 | 0.002826391 | hypothetical protein                                  |
| TGME49_216530 | -7.84 | 4.90 | 0.000796335 | 0.002828098 | ribosome recycling factor protein                     |
| TGME49_255170 | -3.19 | 5.01 | 0.000798551 | 0.002834608 | hypothetical protein                                  |
| TGME49_263230 | -1.17 | 6.78 | 0.000800476 | 0.002840078 | hypothetical protein                                  |
| TGME49_223060 | -1.63 | 6.32 | 0.000803502 | 0.00284906  | MORN repeat-containing protein                        |
| TGME49_247280 | -2.16 | 5.61 | 0.000803779 | 0.00284906  | hypothetical protein                                  |
| TGME49_221390 | -1.78 | 5.94 | 0.000811317 | 0.002874402 | hypothetical protein                                  |
| TGME49_258625 | -7.88 | 4.74 | 0.000828007 | 0.002930724 | peptidyl-prolyl cis-trans isomerase, FKBP-type domain |
| TGME49_238170 | 1.05  | 6.42 | 0.000832116 | 0.002940685 | hypothetical protein                                  |
| TGME49_254090 | -1.39 | 6.52 | 0.000837632 | 0.002956302 | hypothetical protein                                  |
| TGME49_235880 | 1.06  | 7.78 | 0.000838122 | 0.002956618 | brain protein 44 family protein                       |
| TGME49_313385 | 1.47  | 5.03 | 0.00084495  | 0.002975639 | hypothetical protein                                  |
| TGME49_236510 | 1.02  | 6.37 | 0.000845526 | 0.002975639 | hypothetical protein                                  |
| TGME49_268280 | -1.00 | 7.38 | 0.000845403 | 0.002975639 | 'chromo' (CHRomatin Organization MOdifier) domain     |
| TGME49_240460 | -2.50 | 5.64 | 0.000849596 | 0.00298854  | AP2 domain transcription factor AP2VI-1               |
| TGME49_301400 | 1.14  | 9.99 | 0.000853494 | 0.003000824 | hypothetical protein                                  |
| TGME49_229940 | -2.15 | 5.72 | 0.000863227 | 0.003032162 | cyclophilin, putative                                 |
| TGME49_294430 | -3.16 | 5.21 | 0.000866608 | 0.003042594 | hypothetical protein                                  |
| TGME49_228460 | -1.67 | 6.12 | 0.000868545 | 0.003047945 | hypothetical protein                                  |
| TGME49_228030 | 1.56  | 4.77 | 0.000874647 | 0.003064994 | hypothetical protein                                  |
| TGME49_243290 | -1.78 | 6.21 | 0.000876991 | 0.003071752 | hypothetical protein                                  |
| TGME49_244860 | 1.46  | 5.15 | 0.000878866 | 0.003076863 | hypothetical protein                                  |
| TGME49_241180 | -1.11 | 7.10 | 0.000880476 | 0.00308104  | hypothetical protein                                  |
| TGME49_266810 | -1.25 | 6.87 | 0.000882692 | 0.003087333 | hypothetical protein                                  |
| TGME49_278020 | -3.17 | 4.94 | 0.00088375  | 0.003089573 | hypothetical protein                                  |
| TGME49_222240 | -1.20 | 6.92 | 0.000896539 | 0.003132802 | hypothetical protein                                  |
| TGME49_323100 | 1.12  | 6.67 | 0.000901253 | 0.003147787 | hypothetical protein                                  |
| TGME49_241170 | -1.21 | 6.88 | 0.000903766 | 0.003155072 | hypothetical protein                                  |
| TGME49_228630 | -1.14 | 7.14 | 0.000909206 | 0.00317107  | hypothetical protein                                  |
| TGME49_263505 | -3.18 | 5.15 | 0.000911989 | 0.003176281 | hypothetical protein                                  |
| TGME49_266800 | -1.65 | 6.24 | 0.000915992 | 0.003188723 | integral membrane protein, putative                   |
| TGME49_318300 | -2.49 | 5.50 | 0.000919571 | 0.003198169 | hypothetical protein                                  |



|               |       |      |             |             |                                                      |
|---------------|-------|------|-------------|-------------|------------------------------------------------------|
| TGME49_290340 | -1.97 | 6.17 | 0.000922204 | 0.003205817 | HEAT repeat-containing protein                       |
| TGME49_236070 | 1.16  | 6.93 | 0.000923455 | 0.003208659 | pyrroline-5-carboxylate reductase                    |
| TGME49_265070 | -2.53 | 5.58 | 0.00092928  | 0.003227381 | hypothetical protein                                 |
| TGME49_246050 | -7.93 | 4.73 | 0.000930272 | 0.003229309 | hypothetical protein                                 |
| TGME49_264450 | -1.93 | 5.87 | 0.00093149  | 0.00323202  | DNA topoisomerase III beta-1, putative               |
| TGME49_206415 | -1.34 | 6.70 | 0.000932235 | 0.003233088 | myosin K                                             |
| TGME49_213040 | -1.55 | 6.26 | 0.000945713 | 0.003272158 | hypothetical protein                                 |
| TGME49_233890 | -1.95 | 6.03 | 0.0009512   | 0.003289605 | hypothetical protein                                 |
| TGME49_306250 | 1.53  | 5.14 | 0.000953516 | 0.003296072 | hypothetical protein                                 |
| TGME49_203420 | 1.65  | 5.22 | 0.000970031 | 0.003345507 | 4'-phosphopantetheinyl transferase domain-containi   |
| TGME49_212920 | 1.27  | 5.72 | 0.000970079 | 0.003345507 | hypothetical protein                                 |
| TGME49_229450 | -1.79 | 5.88 | 0.000974445 | 0.003355868 | hypothetical protein                                 |
| TGME49_301410 | -1.28 | 6.31 | 0.000980016 | 0.003373481 | hypothetical protein                                 |
| TGME49_224230 | 1.50  | 5.03 | 0.000986009 | 0.003392531 | AP2 domain transcription factor AP2X-3               |
| TGME49_227270 | 2.27  | 5.63 | 0.000990104 | 0.003403455 | hypothetical protein                                 |
| TGME49_288260 | -1.37 | 6.74 | 0.000990815 | 0.003404315 | hypothetical protein                                 |
| TGME49_202430 | 1.19  | 6.35 | 0.000999051 | 0.003424781 | hypothetical protein                                 |
| TGME49_232970 | -3.14 | 5.07 | 0.001006415 | 0.003445106 | hypothetical protein                                 |
| TGME49_222410 | -1.35 | 6.72 | 0.001009748 | 0.003451722 | hypothetical protein                                 |
| TGME49_308070 | -1.96 | 5.86 | 0.001012108 | 0.003458191 | hypothetical protein                                 |
| TGME49_214380 | 1.31  | 5.41 | 0.001013236 | 0.003460447 | hypothetical protein                                 |
| TGME49_242830 | -1.55 | 6.33 | 0.001023856 | 0.003493491 | XRN 5'-3' exonuclease N-terminus protein             |
| TGME49_290225 | -3.16 | 5.04 | 0.001036149 | 0.003530548 | hypothetical protein                                 |
| TGME49_233220 | 1.04  | 7.46 | 0.001041585 | 0.003547434 | hypothetical protein                                 |
| TGME49_209070 | 1.13  | 7.33 | 0.001059074 | 0.003595406 | hypothetical protein                                 |
| TGME49_208390 | 1.44  | 6.10 | 0.001060084 | 0.003597183 | hypothetical protein                                 |
| TGME49_316900 | -1.47 | 6.55 | 0.00106591  | 0.003613635 | Sas10 C-terminal domain-containing protein           |
| TGME49_255290 | -2.21 | 5.03 | 0.001086532 | 0.003678488 | hypothetical protein                                 |
| TGME49_262170 | -2.13 | 5.41 | 0.001090326 | 0.003687955 | hypothetical protein                                 |
| TGME49_315190 | -1.13 | 6.83 | 0.001091307 | 0.003689585 | CAM kinase, SNF1 family                              |
| TGME49_290840 | -1.37 | 6.35 | 0.00109663  | 0.003704195 | serine protease                                      |
| TGME49_240580 | -1.63 | 5.66 | 0.00110104  | 0.003715697 | hypothetical protein                                 |
| TGME49_215060 | -1.16 | 7.25 | 0.001105346 | 0.003728083 | small GTP-binding protein sar1, putative             |
| TGME49_260420 | -1.62 | 6.17 | 0.001105719 | 0.003728083 | HEC/Ndc80p family protein                            |
| TGME49_235610 | -3.11 | 5.08 | 0.001110449 | 0.003742324 | ATPase, AAA family protein                           |
| TGME49_251790 | 1.04  | 6.44 | 0.001111705 | 0.003744849 | hypothetical protein                                 |
| TGME49_230710 | -3.17 | 5.18 | 0.001141148 | 0.003835293 | cell division protein CDC48                          |
| TGME49_273595 | -1.64 | 6.00 | 0.001147888 | 0.003853207 | hypothetical protein                                 |
| TGME49_293460 | -3.13 | 5.22 | 0.001158216 | 0.00388207  | ATP-dependent DNA ligase domain-containing protei    |
| TGME49_282130 | -2.12 | 5.72 | 0.001160632 | 0.003888407 | hypothetical protein                                 |
| TGME49_242790 | -1.35 | 6.69 | 0.001172291 | 0.003922137 | trichohyalin, putative                               |
| TGME49_321170 | 2.26  | 5.28 | 0.001173545 | 0.00392278  | Toxoplasma gondii family C protein                   |
| TGME49_250680 | -2.11 | 5.77 | 0.001173205 | 0.00392278  | TBC domain-containing kinase (incomplete catalytic t |
| TGME49_312480 | 1.13  | 6.37 | 0.001174695 | 0.003924851 | uracil phosphoribosyltransferase FUR1, putative      |
| TGME49_288840 | 1.59  | 7.58 | 0.001180129 | 0.003941227 | hypothetical protein                                 |
| TGME49_248890 | -2.11 | 6.03 | 0.001186319 | 0.003960109 | actin-like protein ALP3b                             |
| TGME49_284540 | -1.03 | 7.47 | 0.001197828 | 0.003989521 | ATP synthase F1, delta subunit protein               |
| TGME49_289790 | -3.16 | 4.93 | 0.001201115 | 0.00399867  | hypothetical protein                                 |
| TGME49_243600 | -1.26 | 6.49 | 0.001209361 | 0.0040225   | acetyltransferase, GNAT family protein               |
| TGME49_226320 | 1.14  | 6.83 | 0.001209928 | 0.004022577 | hypothetical protein                                 |
| TGME49_253800 | -3.15 | 5.03 | 0.001211862 | 0.004026502 | ribosomal protein L15, putative                      |
| TGME49_306950 | -7.84 | 4.67 | 0.001212743 | 0.004026502 | RAP domain-containing protein                        |
| TGME49_205240 | -1.20 | 6.70 | 0.001216801 | 0.004036352 | cleft lip and palate transmembrane protein 1 (clptm1 |
| TGME49_252380 | 1.24  | 6.44 | 0.001228891 | 0.004072801 | hypothetical protein                                 |
| TGME49_257595 | -2.54 | 5.61 | 0.001237609 | 0.004099855 | hypothetical protein                                 |

|               |       |      |             |             |                                                      |
|---------------|-------|------|-------------|-------------|------------------------------------------------------|
| TGME49_305930 | 1.51  | 4.79 | 0.001242253 | 0.0041134   | hypothetical protein                                 |
| TGME49_233540 | -3.25 | 5.15 | 0.001256715 | 0.004159424 | transporter, major facilitator family protein        |
| TGME49_231600 | -1.91 | 6.14 | 0.001259945 | 0.004168247 | HEAT repeat-containing protein                       |
| TGME49_223130 | 1.41  | 5.12 | 0.00127197  | 0.004200513 | hypothetical protein                                 |
| TGME49_272550 | -1.18 | 6.75 | 0.00127945  | 0.004223328 | hypothetical protein                                 |
| TGME49_228320 | -7.69 | 4.69 | 0.001306667 | 0.004301645 | hypothetical protein                                 |
| TGME49_272520 | -1.18 | 6.87 | 0.001308754 | 0.004306515 | hypothetical protein                                 |
| TGME49_241840 | 1.36  | 6.62 | 0.00131873  | 0.004335566 | hypothetical protein                                 |
| TGME49_228060 | -3.21 | 5.12 | 0.001328345 | 0.004365237 | hypothetical protein                                 |
| TGME49_290000 | -7.76 | 4.83 | 0.001339387 | 0.004397615 | hypothetical protein                                 |
| TGME49_321660 | -3.15 | 4.88 | 0.001342488 | 0.004403886 | mannosyltransferase, putative                        |
| TGME49_297150 | -1.07 | 7.18 | 0.001347251 | 0.004415591 | MORN repeat-containing protein                       |
| TGME49_298020 | -1.19 | 6.88 | 0.00134853  | 0.004417825 | DEAD-family helicase                                 |
| TGME49_310660 | -3.08 | 5.16 | 0.001349436 | 0.004418836 | Dullard family phosphatase domain-containing prote   |
| TGME49_269140 | -1.56 | 6.33 | 0.001354822 | 0.00443451  | transport protein particle component, Bet3 domain-c  |
| TGME49_244660 | -3.10 | 5.30 | 0.001366157 | 0.004467655 | hypothetical protein                                 |
| TGME49_213370 | 1.00  | 6.46 | 0.001392928 | 0.004539139 | formin FRM3                                          |
| TGME49_202480 | -3.07 | 5.11 | 0.001392845 | 0.004539139 | hypothetical protein                                 |
| TGME49_203160 | 1.09  | 6.00 | 0.001394462 | 0.004542138 | hypothetical protein                                 |
| TGME49_239630 | -3.10 | 5.29 | 0.001395176 | 0.004542463 | cytidine and deoxycytidylate deaminase zinc-binding  |
| TGME49_221640 | 1.86  | 6.98 | 0.001404418 | 0.004568529 | hypothetical protein                                 |
| TGME49_264970 | -1.26 | 6.43 | 0.001421485 | 0.004619984 | hypothetical protein                                 |
| TGME49_287980 | -1.59 | 6.10 | 0.001422644 | 0.004621719 | FHA domain-containing protein                        |
| TGME49_266110 | 1.30  | 5.29 | 0.001432093 | 0.004646291 | DEAD/DEAH box helicase domain-containing protein     |
| TGME49_242260 | 1.15  | 7.17 | 0.001438798 | 0.004665996 | hypothetical protein                                 |
| TGME49_226940 | -3.11 | 5.08 | 0.001441592 | 0.004673008 | ubiquitin carboxyl-terminal hydrolase                |
| TGME49_244290 | -1.20 | 6.46 | 0.001443459 | 0.004674962 | adapter-related protein                              |
| TGME49_247930 | -7.69 | 4.68 | 0.001457825 | 0.004717355 | SNARE domain-containing protein                      |
| TGME49_242845 | -3.08 | 5.19 | 0.00146826  | 0.004749042 | hypothetical protein                                 |
| TGME49_278550 | -1.78 | 6.00 | 0.001473871 | 0.004763025 | elongation factor Tu GTP binding domain-containing   |
| TGME49_240910 | -1.50 | 6.32 | 0.001482301 | 0.004788174 | hypothetical protein                                 |
| TGME49_304720 | -1.79 | 5.94 | 0.001485336 | 0.004795883 | hypothetical protein                                 |
| TGME49_273580 | -2.08 | 5.41 | 0.001494164 | 0.004818075 | hypothetical protein                                 |
| TGME49_244250 | -1.02 | 8.20 | 0.001498192 | 0.004824753 | hypothetical protein                                 |
| TGME49_265410 | 1.14  | 5.83 | 0.001499693 | 0.004827482 | G-protein beta WD-40 repeat containing protein       |
| TGME49_242850 | -2.07 | 5.93 | 0.001528254 | 0.004913005 | hypothetical protein                                 |
| TGME49_203390 | -1.15 | 7.14 | 0.001532491 | 0.004924483 | CRAL/TRIO domain-containing protein                  |
| TGME49_222910 | -1.34 | 6.45 | 0.001537448 | 0.004936336 | phosphoglycerate mutase                              |
| TGME49_311160 | -1.32 | 6.69 | 0.001553567 | 0.004983546 | PWI domain-containing protein                        |
| TGME49_304750 | -2.09 | 5.37 | 0.001555668 | 0.004988122 | zinc finger, C3HC4 type (RING finger) domain-contain |
| TGME49_261960 | 1.52  | 5.17 | 0.001558889 | 0.00499352  | hypothetical protein                                 |
| TGME49_272000 | -2.08 | 5.52 | 0.001559378 | 0.00499352  | hypothetical protein                                 |
| TGME49_304490 | 1.05  | 6.16 | 0.00156322  | 0.005003657 | hypothetical protein                                 |
| TGME49_205160 | 1.40  | 5.28 | 0.00156623  | 0.005011122 | hypothetical protein                                 |
| TGME49_271440 | -2.42 | 5.43 | 0.001574823 | 0.005036436 | NPL4 family protein                                  |
| TGME49_216850 | -7.64 | 4.72 | 0.00158408  | 0.005061661 | hypothetical protein                                 |
| TGME49_309390 | -7.64 | 4.72 | 0.001591623 | 0.005083568 | hypothetical protein                                 |
| TGME49_294730 | -1.46 | 6.29 | 0.001595766 | 0.0050924   | hypothetical protein                                 |
| TGME49_260840 | -3.08 | 4.88 | 0.001598871 | 0.005100108 | hypothetical protein                                 |
| TGME49_209755 | 2.88  | 6.70 | 0.001612446 | 0.005136221 | hypothetical protein                                 |
| TGME49_208040 | -1.85 | 5.83 | 0.001612971 | 0.005136221 | aldo-keto reductase                                  |
| TGME49_203010 | -1.01 | 7.22 | 0.001622828 | 0.005165385 | aurora kinase                                        |
| TGME49_267120 | -2.41 | 5.47 | 0.001645615 | 0.005226667 | hypothetical protein                                 |
| TGME49_226400 | -1.48 | 6.16 | 0.001648766 | 0.005234425 | lipoic acid synthase LIPA                            |
| TGME49_316760 | 1.37  | 5.65 | 0.001650794 | 0.005238614 | hypothetical protein                                 |

|               |       |      |             |             |                                                        |
|---------------|-------|------|-------------|-------------|--------------------------------------------------------|
| TGME49_202180 | -1.32 | 6.37 | 0.00166002  | 0.005265633 | hypothetical protein                                   |
| TGME49_318730 | -1.21 | 6.68 | 0.001668419 | 0.005287737 | glycosyl transferase                                   |
| TGME49_277090 | 2.17  | 7.62 | 0.001673708 | 0.005299957 | carrier superfamily protein                            |
| TGME49_261780 | 1.08  | 8.77 | 0.001674539 | 0.005300319 | microneme protein MIC7                                 |
| TGME49_259230 | -2.42 | 5.32 | 0.001682337 | 0.005322722 | site-specific recombinase, phage integrase family pro  |
| TGME49_278230 | -3.04 | 5.10 | 0.001704914 | 0.005384936 | prenyltransferase and squalene oxidase repeat-conta    |
| TGME49_258700 | -1.09 | 6.90 | 0.001713632 | 0.005407851 | transporter, major facilitator family protein          |
| TGME49_253300 | 1.79  | 4.94 | 0.001715594 | 0.005411734 | hypothetical protein                                   |
| TGME49_294060 | -1.03 | 7.47 | 0.00173956  | 0.005473321 | hypothetical protein                                   |
| TGME49_309070 | 1.63  | 5.61 | 0.001748473 | 0.005499025 | hypothetical protein                                   |
| TGME49_277820 | -2.43 | 5.23 | 0.00175831  | 0.005525263 | hypothetical protein                                   |
| TGME49_200330 | -1.47 | 6.65 | 0.001761611 | 0.005533284 | hypothetical protein                                   |
| TGME49_280580 | 1.19  | 5.84 | 0.00177146  | 0.005557807 | SAG-related sequence SRS35B                            |
| TGME49_293680 | -1.52 | 6.24 | 0.001771673 | 0.005557807 | hypothetical protein                                   |
| TGME49_240090 | 1.67  | 8.58 | 0.001775567 | 0.00556766  | rhoptry kinase family protein ROP34, putative          |
| TGME49_319930 | -1.28 | 6.40 | 0.001796637 | 0.005630258 | hypothetical protein                                   |
| TGME49_254610 | 1.73  | 5.99 | 0.001807063 | 0.005656827 | Tim10/DDP family zinc finger superfamily protein       |
| TGME49_264440 | -1.58 | 6.16 | 0.001811324 | 0.005667765 | signal recognition particle receptor beta subunit prot |
| TGME49_290960 | -1.20 | 6.72 | 0.001812469 | 0.005668949 | pyruvate phosphate dikinase, pep/pyruvate binding d    |
| TGME49_313570 | -1.31 | 6.48 | 0.001820391 | 0.005691321 | regulator of chromosome condensation (RCC1) repea      |
| TGME49_285520 | -3.05 | 5.20 | 0.001822395 | 0.005695177 | RNA cap guanine-N2 methyltransferase                   |
| TGME49_218740 | 1.73  | 5.57 | 0.0018238   | 0.005697158 | membrane protein, putative                             |
| TGME49_212800 | -1.35 | 6.53 | 0.0018246   | 0.005697251 | hypothetical protein                                   |
| TGME49_267590 | -1.24 | 6.55 | 0.001827119 | 0.005702709 | hypothetical protein                                   |
| TGME49_286740 | 2.15  | 5.13 | 0.001830383 | 0.005708078 | microneme-like protein                                 |
| TGME49_266690 | -1.12 | 6.96 | 0.001831337 | 0.005708646 | hypothetical protein                                   |
| TGME49_233520 | -1.13 | 6.77 | 0.001835481 | 0.005719151 | ATP-dependent RNA helicase                             |
| TGME49_239130 | 1.07  | 5.73 | 0.001838744 | 0.005726906 | Tyrosine kinase-like (TKL) protein                     |
| TGME49_306195 | 2.36  | 5.14 | 0.001851645 | 0.005762232 | hypothetical protein                                   |
| TGME49_221490 | -2.37 | 5.40 | 0.001857848 | 0.005774245 | cell cycle regulator protein                           |
| TGME49_309610 | -3.07 | 4.89 | 0.001869204 | 0.005802224 | hypothetical protein                                   |
| TGME49_237870 | -3.04 | 4.91 | 0.001870443 | 0.005803631 | FYVE zinc finger domain-containing protein             |
| TGME49_209740 | 1.31  | 5.20 | 0.001890301 | 0.00585555  | hypothetical protein                                   |
| TGME49_239320 | -7.58 | 4.74 | 0.00189447  | 0.005865876 | BolA family protein                                    |
| TGME49_246530 | -3.12 | 5.27 | 0.001899478 | 0.005878921 | phospholipase D active site domain-containing prote    |
| TGME49_283810 | -3.03 | 5.42 | 0.00192236  | 0.005944763 | hypothetical protein                                   |
| TGME49_244412 | -2.38 | 5.00 | 0.001933536 | 0.005976689 | hypothetical protein                                   |
| TGME49_244010 | -2.04 | 5.45 | 0.001941224 | 0.005995575 | hypothetical protein                                   |
| TGME49_310350 | -1.49 | 6.39 | 0.001967086 | 0.006067849 | PGAP1 family protein                                   |
| TGME49_314460 | -7.58 | 4.78 | 0.001969983 | 0.006074252 | hypothetical protein                                   |
| TGME49_307860 | 1.18  | 8.14 | 0.001971506 | 0.006076223 | hypothetical protein                                   |
| TGME49_277870 | -1.69 | 6.10 | 0.00197256  | 0.006076223 | hypothetical protein                                   |
| TGME49_209140 | -1.15 | 6.82 | 0.001983154 | 0.0060996   | anti-silencing protein, ASF1 family protein            |
| TGME49_254915 | -2.51 | 5.07 | 0.001999464 | 0.006142101 | hypothetical protein                                   |
| TGME49_314030 | 1.86  | 5.75 | 0.002008902 | 0.006163413 | hypothetical protein                                   |
| TGME49_230520 | -1.04 | 6.96 | 0.002011672 | 0.006164236 | cyclophilin 1, putative                                |
| TGME49_272720 | -1.84 | 5.62 | 0.002011581 | 0.006164236 | methyltransferase domain-containing protein            |
| TGME49_257150 | -2.37 | 5.49 | 0.002016941 | 0.006177821 | NOT2 / NOT3 / NOT5 family protein                      |
| TGME49_289890 | -2.45 | 5.61 | 0.002022454 | 0.006192143 | hypothetical protein                                   |
| TGME49_283830 | 1.73  | 5.33 | 0.002047368 | 0.006260643 | type I inorganic pyrophosphatase PPase                 |
| TGME49_270060 | -1.85 | 5.79 | 0.002048995 | 0.006263028 | hypothetical protein                                   |
| TGME49_278930 | -1.48 | 6.40 | 0.002050701 | 0.006265654 | Tubulin-tyrosine ligase family protein                 |
| TGME49_245580 | 1.12  | 6.12 | 0.002061239 | 0.006292651 | hypothetical protein                                   |
| TGME49_255310 | -1.51 | 5.94 | 0.002068868 | 0.006313336 | zinc finger (CCCH type) motif-containing protein       |
| TGME49_300180 | -3.00 | 4.77 | 0.002073791 | 0.006325747 | hypothetical protein                                   |

|               |       |       |             |             |                                                      |
|---------------|-------|-------|-------------|-------------|------------------------------------------------------|
| TGME49_267140 | -7.60 | 4.84  | 0.00208234  | 0.006343974 | SAG-related sequence SRS38B                          |
| TGME49_280750 | 1.06  | 6.37  | 0.002087367 | 0.00635667  | rudimentary enhancer, putative                       |
| TGME49_202190 | 1.29  | 6.78  | 0.002109783 | 0.006414366 | hypothetical protein                                 |
| TGME49_211680 | -1.12 | 11.04 | 0.002114952 | 0.006422159 | protein disulfide isomerase                          |
| TGME49_224190 | -1.33 | 6.40  | 0.002121425 | 0.006436526 | cation-transporting atpase family protein            |
| TGME49_222920 | -1.66 | 6.07  | 0.002127063 | 0.006450986 | mbp-1 interacting protein-2a family protein          |
| TGME49_202520 | 1.23  | 6.53  | 0.002144585 | 0.006499309 | hypothetical protein                                 |
| TGME49_240730 | -2.99 | 5.10  | 0.002157251 | 0.0065345   | hypothetical protein                                 |
| TGME49_262990 | -3.05 | 4.94  | 0.002160856 | 0.006542738 | hypothetical protein                                 |
| TGME49_222245 | 1.08  | 6.07  | 0.002170221 | 0.006565717 | hypothetical protein                                 |
| TGME49_267040 | -2.37 | 5.35  | 0.002182672 | 0.006597988 | hypothetical protein                                 |
| TGME49_293350 | -1.37 | 6.08  | 0.002230107 | 0.006727625 | mitochondrial carrier superfamily protein            |
| TGME49_232530 | -2.03 | 5.46  | 0.002248241 | 0.006779566 | hypothetical protein                                 |
| TGME49_248630 | -1.39 | 6.51  | 0.002265214 | 0.00682518  | actin-related protein ARP1                           |
| TGME49_216335 | 1.13  | 5.08  | 0.002271722 | 0.006842    | hypothetical protein                                 |
| TGME49_297170 | 1.43  | 5.17  | 0.002276924 | 0.006854876 | 50S ribosomal protein L17, putative                  |
| TGME49_203362 | -3.02 | 4.97  | 0.00229675  | 0.006900517 | hypothetical protein                                 |
| TGME49_261650 | -1.11 | 7.04  | 0.002304217 | 0.00691452  | hypothetical protein                                 |
| TGME49_310330 | -2.05 | 5.47  | 0.002308983 | 0.006923205 | hypothetical protein                                 |
| TGME49_275568 | -1.39 | 6.27  | 0.002317697 | 0.006946516 | GPI transamidase subunit PIG-U protein               |
| TGME49_213870 | -1.13 | 6.92  | 0.002352435 | 0.007036369 | UBA/TS-N domain-containing protein                   |
| TGME49_291350 | -3.01 | 5.02  | 0.002369053 | 0.007075324 | hypothetical protein                                 |
| TGME49_213115 | -7.52 | 4.95  | 0.002369286 | 0.007075324 | hypothetical protein                                 |
| TGME49_261990 | -1.08 | 6.45  | 0.002388426 | 0.007129601 | zinc finger, C3HC4 type (RING finger) domain-contain |
| TGME49_297270 | -2.35 | 5.28  | 0.002393735 | 0.007142564 | hypothetical protein                                 |
| TGME49_309800 | -1.21 | 6.85  | 0.002407222 | 0.00717991  | RNA recognition motif-containing protein             |
| TGME49_312650 | 1.35  | 6.55  | 0.002433021 | 0.007248089 | hypothetical protein                                 |
| TGME49_278260 | -2.99 | 4.79  | 0.00244108  | 0.007266243 | polynucleotide adenylyltransferase                   |
| TGME49_231100 | -1.07 | 6.82  | 0.002446415 | 0.00727635  | hypothetical protein                                 |
| TGME49_238000 | -3.00 | 5.17  | 0.002446444 | 0.00727635  | peptidyl-prolyl isomerase                            |
| TGME49_225330 | -1.14 | 6.63  | 0.002459416 | 0.00730659  | hypothetical protein                                 |
| TGME49_220300 | -1.53 | 5.78  | 0.002459576 | 0.00730659  | ribosomal protein L15 protein                        |
| TGME49_305820 | -1.53 | 5.90  | 0.002472192 | 0.007339811 | SGS domain-containing protein                        |
| TGME49_229160 | -3.02 | 4.89  | 0.002473737 | 0.007339811 | DHHC zinc finger domain-containing protein           |
| TGME49_264890 | -2.35 | 5.24  | 0.002502475 | 0.007407245 | hypothetical protein                                 |
| TGME49_216870 | -1.78 | 5.83  | 0.002511365 | 0.007430585 | DNA excision repair helicase                         |
| TGME49_313160 | -2.33 | 5.73  | 0.002544107 | 0.007518435 | hypothetical protein                                 |
| TGME49_232760 | 1.05  | 6.48  | 0.002556018 | 0.007547603 | protein phosphatase inhibitor IPP2                   |
| TGME49_258380 | -2.01 | 5.55  | 0.002572926 | 0.007585414 | elongation factor p (ef-p) kow family domain-contain |
| TGME49_309010 | 1.77  | 5.04  | 0.002604122 | 0.007674323 | elongation factor P, putative                        |
| TGME49_295950 | 1.48  | 6.77  | 0.002609418 | 0.007683805 | KRUF family protein                                  |
| TGME49_201800 | -1.08 | 7.11  | 0.002615892 | 0.007699803 | hypothetical protein                                 |
| TGME49_253820 | 1.03  | 8.07  | 0.002619986 | 0.007708784 | hypothetical protein                                 |
| TGME49_267760 | -1.67 | 5.83  | 0.002625807 | 0.007719767 | hypothetical protein                                 |
| TGME49_269417 | -2.99 | 4.68  | 0.002624837 | 0.007719767 | hypothetical protein                                 |
| TGME49_251510 | 1.46  | 6.13  | 0.002635119 | 0.007744066 | Ulp1 protease family, C-terminal catalytic domain-co |
| TGME49_295090 | 1.32  | 7.42  | 0.002677128 | 0.007855033 | hypothetical protein                                 |
| TGME49_216220 | -1.21 | 6.84  | 0.002697224 | 0.007907721 | AP2 domain transcription factor AP2XI-5              |
| TGME49_289720 | -1.42 | 6.27  | 0.00271392  | 0.007944073 | hypothetical protein                                 |
| TGME49_249320 | -1.99 | 5.46  | 0.00271724  | 0.007950643 | flavodoxin domain-containing protein                 |
| TGME49_320670 | -1.24 | 6.65  | 0.002719138 | 0.007953047 | vacuolar protein sorting 16, putative                |
| TGME49_244630 | 1.48  | 4.89  | 0.002735487 | 0.007988228 | hypothetical protein                                 |
| TGME49_269700 | 1.67  | 8.27  | 0.002738627 | 0.007994239 | NLI interacting factor family phosphatase            |
| TGME49_240430 | 1.11  | 5.61  | 0.002759083 | 0.008047597 | glyoxalase family protein                            |
| TGME49_318610 | 1.10  | 5.24  | 0.002763445 | 0.008053966 | AP2 domain transcription factor AP2IV-3              |

|               |       |      |             |             |                                                          |
|---------------|-------|------|-------------|-------------|----------------------------------------------------------|
| TGME49_219510 | 1.85  | 6.27 | 0.002771776 | 0.00806553  | GTP binding protein 7 isoform 2 family protein, putative |
| TGME49_295590 | 1.36  | 4.96 | 0.002785514 | 0.008096603 | hypothetical protein                                     |
| TGME49_313790 | 1.11  | 6.66 | 0.002798156 | 0.008125506 | hypothetical protein                                     |
| TGME49_313690 | -1.22 | 6.61 | 0.002798981 | 0.008125506 | Sel1 repeat-containing protein                           |
| TGME49_288900 | 1.26  | 5.12 | 0.002800457 | 0.008126541 | Yos1 family protein                                      |
| TGME49_285930 | -1.89 | 5.78 | 0.002806217 | 0.008136929 | hypothetical protein                                     |
| TGME49_217730 | 1.06  | 5.67 | 0.00283264  | 0.008203894 | hypothetical protein                                     |
| TGME49_272570 | 1.57  | 5.28 | 0.002859161 | 0.008270514 | dihydrouridine synthase (dus) protein                    |
| TGME49_319710 | -1.36 | 6.22 | 0.002863547 | 0.008277195 | kinesin motor domain-containing protein                  |
| TGME49_316240 | -1.51 | 6.03 | 0.002872813 | 0.008297492 | hypothetical protein                                     |
| TGME49_261490 | -1.03 | 6.83 | 0.002897467 | 0.008365431 | hypothetical protein                                     |
| TGME49_315360 | -1.25 | 6.61 | 0.00290427  | 0.0083818   | hypothetical protein                                     |
| TGME49_275420 | -1.37 | 6.42 | 0.002909488 | 0.008393585 | histone lysine-specific demethylase LSD1/BHC110/KD       |
| TGME49_262860 | -2.30 | 5.32 | 0.002937342 | 0.008463257 | ADP-ribosylation factor family protein 1, putative       |
| TGME49_221990 | -1.01 | 6.74 | 0.002960188 | 0.008516587 | hypothetical protein                                     |
| TGME49_223600 | -1.99 | 5.45 | 0.002959758 | 0.008516587 | hypothetical protein                                     |
| TGME49_252490 | -1.77 | 5.95 | 0.002981333 | 0.008563937 | vacuolar protein sorting 29, putative                    |
| TGME49_244140 | -3.04 | 4.78 | 0.002982437 | 0.008563937 | hypothetical protein                                     |
| TGME49_206605 | 1.20  | 5.59 | 0.003018304 | 0.008648146 | hypothetical protein                                     |
| TGME49_315500 | -1.24 | 6.66 | 0.003016557 | 0.008648146 | hypothetical protein                                     |
| TGME49_210380 | -1.18 | 6.73 | 0.003042051 | 0.008711434 | hypothetical protein                                     |
| TGME49_224330 | -1.03 | 6.99 | 0.00305893  | 0.008750782 | proteasome activator pa28 beta subunit protein           |
| TGME49_262130 | -1.41 | 6.15 | 0.003059342 | 0.008750782 | hypothetical protein                                     |
| TGME49_204880 | -1.82 | 5.83 | 0.003075733 | 0.008790865 | hypothetical protein                                     |
| TGME49_255440 | 1.26  | 5.19 | 0.003097836 | 0.008840369 | hypothetical protein                                     |
| TGME49_221950 | -1.13 | 6.81 | 0.00310505  | 0.008857538 | spliceosome-associated protein, putative                 |
| TGME49_320720 | -2.34 | 5.10 | 0.003112788 | 0.008876187 | hypothetical protein                                     |
| TGME49_235960 | -7.45 | 4.72 | 0.003179475 | 0.009048898 | hypothetical protein                                     |
| TGME49_223270 | 1.19  | 5.48 | 0.003180822 | 0.009049249 | hypothetical protein                                     |
| TGME49_221870 | 1.23  | 7.14 | 0.003205543 | 0.009109065 | hypothetical protein                                     |
| TGME49_203710 | -1.16 | 8.63 | 0.003220576 | 0.009148267 | AP2 domain transcription factor AP2V11a-4                |
| TGME49_288460 | -1.02 | 7.02 | 0.003252131 | 0.009230808 | hypothetical protein                                     |
| TGME49_206700 | -2.96 | 4.86 | 0.003266051 | 0.009266761 | hypothetical protein                                     |
| TGME49_288945 | -1.50 | 6.28 | 0.003274442 | 0.009287007 | hypothetical protein                                     |
| TGME49_236840 | -1.11 | 6.61 | 0.003276046 | 0.009287994 | zinc finger (C-x8-C-x5-C-x3-H)-2, putative               |
| TGME49_240950 | -3.00 | 4.75 | 0.003290916 | 0.009323001 | hypothetical protein                                     |
| TGME49_279370 | -1.05 | 6.55 | 0.003300887 | 0.009347668 | SNARE associated Golgi protein                           |
| TGME49_312210 | -2.28 | 5.52 | 0.003302935 | 0.009349884 | hypothetical protein                                     |
| TGME49_316750 | -2.93 | 4.89 | 0.003319323 | 0.00939268  | DEAD/DEAH box helicase domain-containing protein         |
| TGME49_219100 | -1.60 | 5.69 | 0.003342686 | 0.009455173 | cyclin-dependent kinase regulatory subunit protein       |
| TGME49_247640 | 1.04  | 5.99 | 0.003357632 | 0.009490187 | hypothetical protein                                     |
| TGME49_281420 | -2.28 | 5.07 | 0.003360672 | 0.009491525 | histone deacetylase HDAC1                                |
| TGME49_258100 | -2.95 | 4.89 | 0.003418186 | 0.009650275 | TPR repeat region protein                                |
| TGME49_269720 | 1.63  | 6.13 | 0.003425176 | 0.009664313 | hypothetical protein                                     |
| TGME49_276120 | -2.46 | 4.94 | 0.003455137 | 0.009736008 | histone lysine methyltransferase, SET, putative          |
| TGME49_258080 | -1.64 | 5.91 | 0.003472012 | 0.009776108 | hypothetical protein                                     |
| TGME49_299060 | -1.08 | 6.76 | 0.003478994 | 0.009788311 | sodium/hydrogen exchanger NHE2                           |
| TGME49_305870 | -2.29 | 5.28 | 0.003481306 | 0.00979109  | DAD family protein                                       |
| TGME49_311740 | -1.98 | 5.52 | 0.003507963 | 0.00986231  | hypothetical protein                                     |
| TGME49_313960 | -2.93 | 5.10 | 0.00356258  | 0.009996856 | ribosomal protein L19 protein                            |
| TGME49_231920 | 1.38  | 6.14 | 0.003598604 | 0.010086459 | oxidoreductase, short chain dehydrogenase/reductase      |
| TGME49_200250 | -1.00 | 6.44 | 0.003609349 | 0.010112742 | microneme protein MIC17A                                 |
| TGME49_278780 | -1.37 | 6.27 | 0.003631009 | 0.010169576 | hypothetical protein                                     |
| TGME49_275770 | -1.31 | 6.31 | 0.003646872 | 0.010210138 | hypothetical protein                                     |
| TGME49_285830 | -1.04 | 6.53 | 0.003652299 | 0.01022146  | hypothetical protein                                     |

|               |       |       |             |             |                                                         |
|---------------|-------|-------|-------------|-------------|---------------------------------------------------------|
| TGME49_215480 | -1.74 | 5.60  | 0.003670492 | 0.010262531 | Adenosine/AMP deaminase domain-containing prote         |
| TGME49_264460 | -2.02 | 5.15  | 0.003672526 | 0.010262531 | DNA-directed RNA polymerase III RPC5                    |
| TGME49_305230 | -2.30 | 4.82  | 0.003678592 | 0.010271718 | hypothetical protein                                    |
| TGME49_208990 | 1.21  | 5.29  | 0.003710934 | 0.01035139  | hypothetical protein                                    |
| TGME49_252400 | 2.06  | 5.14  | 0.003743208 | 0.010428514 | HIT zinc finger protein                                 |
| TGME49_295980 | -1.62 | 5.98  | 0.003748378 | 0.010435056 | hypothetical protein                                    |
| TGME49_321600 | -1.13 | 6.53  | 0.003804482 | 0.010575316 | hypothetical protein                                    |
| TGME49_307980 | 1.51  | 5.22  | 0.003850312 | 0.010689588 | GTP-binding protein lepA, putative                      |
| TGME49_297360 | -1.34 | 6.33  | 0.003860322 | 0.01070237  | hypothetical protein                                    |
| TGME49_288210 | 1.11  | 6.24  | 0.003872061 | 0.010730891 | PUL domain-containing protein                           |
| TGME49_285680 | 1.13  | 5.89  | 0.003890662 | 0.010778403 | dihydrolipoamide acyltransferase, putative              |
| TGME49_214120 | -2.91 | 4.78  | 0.003929782 | 0.010874555 | hypothetical protein                                    |
| TGME49_257060 | -1.93 | 5.49  | 0.003949423 | 0.010924815 | translation initiation factor sui1 protein              |
| TGME49_213445 | -1.43 | 7.01  | 0.003959912 | 0.010938937 | hypothetical protein                                    |
| TGME49_249450 | -2.89 | 4.73  | 0.003959983 | 0.010938937 | hypothetical protein                                    |
| TGME49_213000 | 2.22  | 5.32  | 0.00397583  | 0.01097323  | replication factor C, subunit 5, putative               |
| TGME49_271240 | -2.26 | 5.16  | 0.003985288 | 0.010995231 | hypothetical protein                                    |
| TGME49_260270 | -1.44 | 6.12  | 0.00401493  | 0.011064626 | HEAT repeat-containing protein                          |
| TGME49_255245 | 1.40  | 4.95  | 0.004056443 | 0.01116239  | hypothetical protein                                    |
| TGME49_306510 | 1.82  | 5.11  | 0.004069493 | 0.011185812 | hypothetical protein                                    |
| TGME49_252250 | -1.61 | 5.07  | 0.004067014 | 0.011185812 | ATPase, AAA family protein                              |
| TGME49_202730 | -1.96 | 5.45  | 0.004068963 | 0.011185812 | hypothetical protein                                    |
| TGME49_269800 | -1.93 | 5.58  | 0.004082836 | 0.011218316 | glutamine-dependent NAD(+) synthetase protein, pu       |
| TGME49_230920 | -2.86 | 4.80  | 0.004092128 | 0.011235497 | adaptor complexes medium subunit family protein         |
| TGME49_214630 | -1.37 | 5.89  | 0.004179161 | 0.011446729 | hypothetical protein                                    |
| TGME49_231815 | -1.98 | 5.33  | 0.004179898 | 0.011446729 | hypothetical protein                                    |
| TGME49_226040 | -1.12 | 6.54  | 0.004184638 | 0.011446929 | EF hand domain-containing protein                       |
| TGME49_300280 | -1.96 | 5.77  | 0.004265226 | 0.011635056 | LSM domain-containing protein                           |
| TGME49_298010 | -1.28 | 7.06  | 0.004270243 | 0.011642394 | hypothetical protein                                    |
| TGME49_293700 | -1.37 | 6.01  | 0.004276299 | 0.011650316 | WD domain, G-beta repeat-containing protein             |
| TGME49_301010 | -1.13 | 6.37  | 0.004278004 | 0.011650668 | serine/threonine protein phosphatase, putative          |
| TGME49_203050 | 1.88  | 6.44  | 0.004296369 | 0.011687768 | AP2 domain transcription factor AP2VIIa-6               |
| TGME49_270370 | -2.01 | 5.67  | 0.004323828 | 0.01175814  | clathrin assembly protein AP19, putative                |
| TGME49_278890 | -1.95 | 5.41  | 0.004331526 | 0.011767317 | hypothetical protein                                    |
| TGME49_294750 | -2.84 | 4.76  | 0.004329655 | 0.011767317 | hypothetical protein                                    |
| TGME49_229030 | -1.13 | 6.70  | 0.004352671 | 0.011819189 | hypothetical protein                                    |
| TGME49_313660 | 1.32  | 4.89  | 0.0043673   | 0.011842859 | hypothetical protein                                    |
| TGME49_315980 | -1.92 | 5.45  | 0.00437057  | 0.011846038 | EREBP-4 family protein                                  |
| TGME49_242625 | -1.28 | 6.49  | 0.004380585 | 0.011860142 | ATPase family associated with various cellular activiti |
| TGME49_287970 | -1.02 | 7.38  | 0.004398939 | 0.011905475 | hypothetical protein                                    |
| TGME49_307020 | -1.40 | 6.25  | 0.004411595 | 0.011930993 | hypothetical protein                                    |
| TGME49_227260 | -2.26 | 5.33  | 0.004434004 | 0.011983425 | RIO1 family protein                                     |
| TGME49_263590 | -1.94 | 5.74  | 0.004438824 | 0.011987095 | hypothetical protein                                    |
| TGME49_215550 | -1.97 | 5.78  | 0.004490268 | 0.012103916 | hypothetical protein                                    |
| TGME49_224350 | -1.10 | 8.79  | 0.004528888 | 0.012190242 | aminopeptidase N, putative                              |
| TGME49_268000 | -2.24 | 5.44  | 0.004528223 | 0.012190242 | hypothetical protein                                    |
| TGME49_224090 | -1.72 | 5.72  | 0.004601123 | 0.012362174 | enoyl-CoA hydratase/isomerase family protein            |
| TGME49_246990 | -2.22 | 5.31  | 0.004660605 | 0.012490219 | hypothetical protein                                    |
| TGME49_286640 | -2.84 | 4.82  | 0.004723798 | 0.012632102 | GTPase                                                  |
| TGME49_214170 | -1.58 | 5.69  | 0.004771098 | 0.01273556  | hypothetical protein                                    |
| TGME49_270170 | -1.56 | 5.71  | 0.00480516  | 0.012812604 | hypothetical protein                                    |
| TGME49_270650 | 1.20  | 5.24  | 0.004832209 | 0.01286617  | deoxyribose-phosphate aldolase                          |
| TGME49_249850 | -1.52 | 10.25 | 0.004899821 | 0.013027427 | GAP40 protein                                           |
| TGME49_218192 | -7.38 | 5.36  | 0.004931956 | 0.013099018 | hypothetical protein                                    |
| TGME49_251590 | 1.31  | 5.99  | 0.004942692 | 0.013113118 | hypothetical protein                                    |

|               |       |      |             |             |                                                     |
|---------------|-------|------|-------------|-------------|-----------------------------------------------------|
| TGME49_244150 | -1.93 | 5.09 | 0.004942302 | 0.013113118 | glycerate kinase                                    |
| TGME49_201380 | 1.15  | 9.02 | 0.004950057 | 0.013123241 | chorismate synthase, putative                       |
| TGME49_311510 | -1.14 | 8.65 | 0.004967435 | 0.013164592 | eIF2 kinase IF2K-B                                  |
| TGME49_208360 | 1.14  | 5.38 | 0.005011909 | 0.01326344  | hypothetical protein                                |
| TGME49_255670 | -2.82 | 4.91 | 0.005058391 | 0.013376875 | methyltransferase domain-containing protein         |
| TGME49_259600 | -1.56 | 5.75 | 0.005100183 | 0.013477754 | hypothetical protein                                |
| TGME49_249690 | -2.89 | 5.20 | 0.005125259 | 0.013529512 | hypothetical protein                                |
| TGME49_249310 | -2.82 | 5.20 | 0.005157622 | 0.01360523  | hypothetical protein                                |
| TGME49_285720 | -2.21 | 4.96 | 0.005175359 | 0.013642283 | ATP binding protein, putative                       |
| TGME49_313150 | 1.58  | 6.73 | 0.005185547 | 0.013659401 | DUF89/Fructose bisphosphatase                       |
| TGME49_230010 | -1.43 | 6.26 | 0.005208305 | 0.013697478 | hypothetical protein                                |
| TGME49_305800 | -1.54 | 5.93 | 0.005207028 | 0.013697478 | 6-pyruvoyl tetrahydrobiopterin synthase             |
| TGME49_277710 | -1.08 | 6.64 | 0.005214466 | 0.013701407 | hypothetical protein                                |
| TGME49_297330 | 1.06  | 5.60 | 0.005272747 | 0.013838266 | hypothetical protein                                |
| TGME49_294380 | -2.19 | 5.40 | 0.00529015  | 0.013865782 | PP-loop domain-containing protein                   |
| TGME49_249160 | -2.22 | 4.70 | 0.005302216 | 0.013892483 | UAA transporter family protein                      |
| TGME49_258650 | -2.21 | 5.11 | 0.005313041 | 0.013910986 | protoheme ferro-lyase, putative                     |
| TGME49_263530 | -1.22 | 6.47 | 0.005341449 | 0.013980415 | chaperonin , putative                               |
| TGME49_221270 | -1.11 | 6.87 | 0.005360909 | 0.014016464 | oxidoreductase, 2OG-Fe(II) oxygenase family protein |
| TGME49_249950 | -2.20 | 5.46 | 0.00535967  | 0.014016464 | Mak16 protein                                       |
| TGME49_267440 | 1.14  | 5.72 | 0.005371409 | 0.014038953 | RING zinc finger protein                            |
| TGME49_260480 | -2.84 | 4.87 | 0.005390978 | 0.014080145 | leucine rich repeat-containing protein              |
| TGME49_226840 | -2.20 | 5.41 | 0.005408163 | 0.014110076 | hypothetical protein                                |
| TGME49_312360 | -2.81 | 4.90 | 0.005436462 | 0.014168911 | hypothetical protein                                |
| TGME49_292035 | 1.40  | 4.87 | 0.005501565 | 0.014308327 | hypothetical protein                                |
| TGME49_228780 | 1.11  | 5.46 | 0.005510525 | 0.014326589 | Toxoplasma gondii family C protein                  |
| TGME49_227440 | 1.02  | 5.77 | 0.005513505 | 0.014329298 | WD domain, G-beta repeat-containing protein         |
| TGME49_202350 | -1.53 | 5.81 | 0.005565556 | 0.014444269 | 50S ribosomal protein L21, putative                 |
| TGME49_286030 | -1.08 | 6.65 | 0.005570172 | 0.014451175 | hypothetical protein                                |
| TGME49_219530 | -2.83 | 5.05 | 0.00560999  | 0.01453408  | hypothetical protein                                |
| TGME49_213670 | -1.10 | 6.71 | 0.005644578 | 0.014608333 | hypothetical protein                                |
| TGME49_262000 | -2.84 | 4.73 | 0.005677375 | 0.014682935 | AP2 domain transcription factor AP2VIIb-2           |
| TGME49_285700 | -2.83 | 4.70 | 0.005763416 | 0.01488169  | ubiquitin fusion degradation protein UFD1AP         |
| TGME49_278110 | -1.59 | 5.83 | 0.005783631 | 0.014921203 | 1,3-beta-glucan synthase component protein          |
| TGME49_280590 | -2.85 | 4.77 | 0.0057965   | 0.014942835 | hypothetical protein                                |
| TGME49_259080 | 1.81  | 6.29 | 0.005823562 | 0.014992832 | hypothetical protein                                |
| TGME49_203750 | -1.89 | 5.36 | 0.005821952 | 0.014992832 | hypothetical protein                                |
| TGME49_240480 | -2.92 | 4.71 | 0.005830265 | 0.015001769 | cpw-wpc domain-containing protein                   |
| TGME49_305010 | -1.73 | 5.59 | 0.005833232 | 0.015002058 | pre-mRNA branch site protein p14, putative          |
| TGME49_278250 | 1.24  | 5.20 | 0.005857553 | 0.015059371 | hypothetical protein                                |
| TGME49_230890 | -1.40 | 5.65 | 0.005908812 | 0.015175324 | PHD-finger domain-containing protein                |
| TGME49_319308 | -1.88 | 6.63 | 0.006031999 | 0.015470206 | hypothetical protein                                |
| TGME49_252230 | -1.16 | 6.25 | 0.006046211 | 0.015495904 | hypothetical protein                                |
| TGME49_222300 | -1.18 | 6.16 | 0.006066599 | 0.01554277  | hypothetical protein                                |
| TGME49_234560 | -1.19 | 6.18 | 0.006137311 | 0.015694963 | hypothetical protein                                |
| TGME49_309780 | -1.66 | 5.56 | 0.006138738 | 0.015694963 | hypothetical protein                                |
| TGME49_258940 | 1.34  | 5.05 | 0.006148779 | 0.015709769 | acylphosphatase family protein                      |
| TGME49_285880 | 1.31  | 4.94 | 0.006147064 | 0.015709769 | hypothetical protein                                |
| TGME49_239690 | 1.21  | 5.52 | 0.006153682 | 0.015711438 | hypothetical protein                                |
| TGME49_216580 | -1.43 | 6.03 | 0.006152237 | 0.015711438 | hypothetical protein                                |
| TGME49_228170 | 1.04  | 9.27 | 0.006210194 | 0.015812044 | inner membrane complex protein IMC2A                |
| TGME49_276190 | -1.91 | 5.61 | 0.006221052 | 0.015828789 | hypothetical protein                                |
| TGME49_305030 | -1.51 | 5.98 | 0.00624691  | 0.015878189 | kinase, pfkB family protein                         |
| TGME49_259650 | -2.79 | 4.78 | 0.006316068 | 0.016037433 | hypothetical protein                                |
| TGME49_289950 | -1.16 | 6.53 | 0.006402046 | 0.016233445 | hypothetical protein                                |

|               |       |      |             |             |                                                          |
|---------------|-------|------|-------------|-------------|----------------------------------------------------------|
| TGME49_306890 | -1.42 | 5.84 | 0.006427923 | 0.016276735 | hypothetical protein                                     |
| TGME49_206300 | -2.18 | 5.15 | 0.006434809 | 0.016287333 | hypothetical protein                                     |
| TGME49_255340 | -1.09 | 6.51 | 0.006455532 | 0.016329868 | tetratricopeptide repeat-containing protein              |
| TGME49_242320 | -1.15 | 6.85 | 0.00648574  | 0.016400671 | B-box zinc finger domain-containing protein              |
| TGME49_218200 | -2.17 | 5.33 | 0.006555763 | 0.016566408 | UDP-sugar pyrophosphorylase                              |
| TGME49_309880 | -1.14 | 6.92 | 0.006626278 | 0.016704637 | hypothetical protein                                     |
| TGME49_232090 | -1.63 | 5.75 | 0.006669645 | 0.016796784 | 3-hydroxyacyl-CoA dehydrogenase, NAD binding dom         |
| TGME49_218960 | -1.28 | 8.73 | 0.006675015 | 0.016804584 | AP2 domain transcription factor AP2XII-1                 |
| TGME49_225120 | 1.05  | 9.47 | 0.006717548 | 0.016894405 | hypothetical protein                                     |
| TGME49_314710 | -1.22 | 6.29 | 0.006773238 | 0.017028672 | carrier superfamily protein                              |
| TGME49_288990 | -2.21 | 5.24 | 0.006847481 | 0.017197783 | hypothetical protein                                     |
| TGME49_209870 | -1.84 | 5.26 | 0.006998783 | 0.017536089 | HAD hydrolase, family IIA protein                        |
| TGME49_278060 | -1.62 | 5.50 | 0.007009885 | 0.017557957 | Mre11 DNA-binding domain-containing protein              |
| TGME49_238070 | -2.73 | 5.04 | 0.007014219 | 0.017562864 | glutaredoxin domain-containing protein                   |
| TGME49_231890 | -1.41 | 6.02 | 0.007048828 | 0.017637575 | beta-ketoacyl-acyl carrier protein synthase III, putativ |
| TGME49_275740 | -2.83 | 4.73 | 0.007105599 | 0.017761596 | hypothetical protein                                     |
| TGME49_246690 | -1.83 | 5.40 | 0.007189647 | 0.017941361 | alpha amylase, catalytic domain-containing protein       |
| TGME49_304650 | -1.23 | 5.99 | 0.00722676  | 0.018021808 | histidine acid phosphatase superfamily protein           |
| TGME49_284040 | -1.33 | 6.15 | 0.007249734 | 0.018073006 | hypothetical protein                                     |
| TGME49_313970 | -1.87 | 5.45 | 0.007370295 | 0.018354989 | Phytanoyl-CoA dioxygenase (PhyH) superfamily prote       |
| TGME49_298060 | -2.00 | 5.15 | 0.00737964  | 0.018372073 | Toxoplasma gondii family C protein                       |
| TGME49_263560 | 1.29  | 7.28 | 0.007449424 | 0.018514635 | hypothetical protein                                     |
| TGME49_249190 | 1.34  | 5.13 | 0.007476296 | 0.018568939 | AP2 domain transcription factor AP2XII-6                 |
| TGME49_218580 | -1.63 | 5.45 | 0.007480997 | 0.018574376 | RNA methyltransferase, TrmH family protein               |
| TGME49_277895 | -1.39 | 5.67 | 0.007497319 | 0.018608653 | ubiquitin carboxyl-terminal hydrolase                    |
| TGME49_236130 | 1.74  | 6.02 | 0.007581343 | 0.018791988 | signal recognition particle (SRP9) domain-containing     |
| TGME49_273310 | -1.30 | 6.16 | 0.007584417 | 0.018791988 | hypothetical protein                                     |
| TGME49_226620 | -1.65 | 5.71 | 0.007600105 | 0.01881955  | hypothetical protein                                     |
| TGME49_320610 | -2.18 | 5.08 | 0.007617022 | 0.018855126 | hypothetical protein                                     |
| TGME49_250060 | 1.17  | 5.19 | 0.007642705 | 0.01891237  | DNA-directed RNA polymerase I RPA12                      |
| TGME49_234610 | -1.14 | 6.61 | 0.007649903 | 0.018917518 | WD-40 repeat protein                                     |
| TGME49_211610 | 1.00  | 5.73 | 0.007726515 | 0.019087822 | hypothetical protein                                     |
| TGME49_312310 | -2.15 | 5.42 | 0.00773769  | 0.019109044 | ATPase, AAA family protein                               |
| TGME49_305620 | -1.42 | 5.96 | 0.007792918 | 0.019226172 | hypothetical protein                                     |
| TGME49_292610 | -7.13 | 4.84 | 0.00780307  | 0.019244795 | Toxoplasma gondii family C protein                       |
| TGME49_215080 | -1.29 | 5.65 | 0.007807697 | 0.019248637 | hypothetical protein                                     |
| TGME49_266380 | -7.15 | 5.23 | 0.007934623 | 0.019523661 | hypothetical protein                                     |
| TGME49_275750 | -1.31 | 6.27 | 0.008033354 | 0.019753449 | small nuclear ribonucleoprotein E, putative              |
| TGME49_318320 | -2.16 | 5.00 | 0.0080557   | 0.01980181  | ATP-dependent Clp endopeptidase, proteolytic subur       |
| TGME49_229790 | -1.61 | 5.71 | 0.008122005 | 0.019938282 | hypothetical protein                                     |
| TGME49_310730 | -1.10 | 6.50 | 0.008146735 | 0.019985721 | hypothetical protein                                     |
| TGME49_203030 | 1.10  | 7.98 | 0.008183783 | 0.020063293 | N-methyl-D-aspartate receptor-associated protein         |
| TGME49_234370 | -2.22 | 5.10 | 0.008197832 | 0.020091074 | SAG-related sequence SRS42                               |
| TGME49_240490 | -2.20 | 4.97 | 0.0082745   | 0.020245418 | hypothetical protein                                     |
| TGME49_222940 | 1.75  | 5.07 | 0.008444826 | 0.020588801 | hypothetical protein                                     |
| TGME49_289910 | -1.02 | 7.86 | 0.008484847 | 0.020670116 | hypothetical protein                                     |
| TGME49_235905 | -2.10 | 5.09 | 0.008487216 | 0.020670116 | ribonuclease z, putative                                 |
| TGME49_279540 | -7.14 | 4.99 | 0.008560928 | 0.020801676 | hypothetical protein                                     |
| TGME49_230990 | 1.32  | 5.02 | 0.008637767 | 0.020947081 | hypothetical protein                                     |
| TGME49_204040 | -2.11 | 4.98 | 0.008632303 | 0.020947081 | hypothetical protein                                     |
| TGME49_297790 | -1.46 | 6.27 | 0.00876696  | 0.021218626 | hypothetical protein                                     |
| TGME49_258030 | -1.31 | 6.12 | 0.008771069 | 0.021221623 | DNA polymerase                                           |
| TGME49_211020 | -1.46 | 5.85 | 0.008801384 | 0.021288006 | RNA recognition motif-containing protein                 |
| TGME49_214500 | 1.12  | 6.17 | 0.00881498  | 0.021293028 | ankyrin repeat-containing protein                        |
| TGME49_268010 | -1.26 | 5.82 | 0.008839642 | 0.021345627 | hypothetical protein                                     |



|               |       |      |             |             |                                                        |
|---------------|-------|------|-------------|-------------|--------------------------------------------------------|
| TGME49_308030 | -1.38 | 5.86 | 0.008856965 | 0.021373499 | hypothetical protein                                   |
| TGME49_263580 | 1.49  | 6.93 | 0.008874242 | 0.021404473 | bromodomain-containing protein                         |
| TGME49_215940 | -1.15 | 6.63 | 0.00887559  | 0.021404473 | Acetyl-coenzyme A transporter, putative                |
| TGME49_220150 | -1.79 | 5.32 | 0.008896105 | 0.021446952 | 50S ribosomal protein L16, putative                    |
| TGME49_226980 | 1.29  | 7.50 | 0.009041628 | 0.021755898 | hypothetical protein                                   |
| TGME49_268560 | -1.60 | 5.40 | 0.009041909 | 0.021755898 | XPG N-terminal domain-containing protein               |
| TGME49_207720 | -1.26 | 6.17 | 0.009153016 | 0.021980319 | hypothetical protein                                   |
| TGME49_293490 | 1.78  | 4.86 | 0.009298033 | 0.022286452 | hypothetical protein                                   |
| TGME49_218610 | -1.64 | 5.51 | 0.009298581 | 0.022286452 | ATPase (DUF699) protein                                |
| TGME49_265080 | -1.01 | 6.57 | 0.009310431 | 0.022300397 | Tubulin-tyrosine ligase family protein                 |
| TGME49_301450 | -1.00 | 6.33 | 0.009389306 | 0.022452952 | FG-GAP repeat-containing protein                       |
| TGME49_285470 | 1.28  | 5.36 | 0.00948134  | 0.022658379 | patched family protein                                 |
| TGME49_233300 | -2.07 | 5.35 | 0.009501348 | 0.0226842   | RhoGAP domain-containing protein                       |
| TGME49_318720 | 1.15  | 6.14 | 0.00957527  | 0.0228312   | pyridoxal phosphate enzyme, YggS family protein        |
| TGME49_320470 | 1.90  | 5.10 | 0.009593188 | 0.022866549 | hypothetical protein                                   |
| TGME49_289010 | -1.78 | 5.19 | 0.009677922 | 0.023033076 | RNA recognition motif-containing protein               |
| TGME49_231040 | -2.69 | 4.79 | 0.009678627 | 0.023033076 | 3' exoribonuclease family, domain 1 domain-containi    |
| TGME49_225108 | -1.44 | 5.44 | 0.00978209  | 0.023256841 | SNF7 family protein                                    |
| TGME49_257780 | -1.44 | 5.65 | 0.009788924 | 0.023265608 | hypothetical protein                                   |
| TGME49_238040 | -1.07 | 6.79 | 0.009855636 | 0.023416636 | protein disulfide-isomerase domain-containing prote    |
| TGME49_209090 | -1.13 | 6.52 | 0.009912401 | 0.023543943 | proteasome maturation factor ump1 protein              |
| TGME49_232730 | 1.04  | 6.03 | 0.010040255 | 0.023824662 | acyl-CoA:diacylglycerol acyltransferase 1-related enzy |
| TGME49_216920 | -1.80 | 5.62 | 0.010091085 | 0.023929918 | mediator complex subunit MED8                          |
| TGME49_300330 | 1.01  | 5.61 | 0.010124859 | 0.023994618 | hypothetical protein                                   |
| TGME49_316520 | -1.13 | 6.34 | 0.010138203 | 0.024018544 | 1,4-alpha-glucan-branching enzyme                      |
| TGME49_294812 | -2.65 | 5.19 | 0.010158995 | 0.024060093 | RNA recognition motif-containing protein               |
| TGME49_215250 | -1.77 | 5.32 | 0.010213845 | 0.02417451  | thiamin pyrophosphokinase, catalytic domain-contain    |
| TGME49_243240 | 1.37  | 4.74 | 0.010225547 | 0.024187357 | WD domain, G-beta repeat-containing protein            |
| TGME49_216960 | 1.04  | 5.62 | 0.010231948 | 0.024194123 | elongation factor Tu GTP binding domain-containing     |
| TGME49_214400 | -2.07 | 5.11 | 0.010353244 | 0.024457471 | hypothetical protein                                   |
| TGME49_294902 | -1.58 | 5.09 | 0.01047504  | 0.024696658 | hypothetical protein                                   |
| TGME49_264200 | -1.76 | 5.19 | 0.01050678  | 0.024756893 | hypothetical protein                                   |
| TGME49_258050 | -2.05 | 5.14 | 0.010595698 | 0.024942562 | actin like protein ALP2a                               |
| TGME49_210478 | -1.44 | 4.78 | 0.010600783 | 0.02494659  | hypothetical protein                                   |
| TGME49_245435 | 1.27  | 5.14 | 0.010792786 | 0.025350018 | hypothetical protein                                   |
| TGME49_310770 | -1.15 | 6.43 | 0.010804695 | 0.025361877 | hypothetical protein                                   |
| TGME49_263710 | -1.06 | 6.32 | 0.010834779 | 0.025416356 | acyl-CoA:cholesterol acyltransferase alpha ACAT1-alp   |
| TGME49_301460 | 1.13  | 5.61 | 0.01094793  | 0.025665503 | hypothetical protein                                   |
| TGME49_206500 | -2.71 | 4.78 | 0.010996729 | 0.02574725  | hypothetical protein                                   |
| TGME49_262450 | -1.06 | 7.29 | 0.011092563 | 0.02591419  | hypothetical protein                                   |
| TGME49_247590 | -1.75 | 5.36 | 0.011247444 | 0.026259425 | methyltransferase domain-containing protein            |
| TGME49_240450 | 1.35  | 5.84 | 0.011276774 | 0.026319591 | Maf family protein                                     |
| TGME49_215450 | 1.99  | 6.55 | 0.011385053 | 0.026555547 | aquaporin 1                                            |
| TGME49_239580 | -7.04 | 4.82 | 0.011452633 | 0.026671109 | hypothetical protein                                   |
| TGME49_217500 | 2.01  | 7.03 | 0.011496637 | 0.026765154 | HMG (high mobility group) box domain-containing pr     |
| TGME49_257500 | 1.30  | 5.05 | 0.011632817 | 0.027056637 | hypothetical protein                                   |
| TGME49_288640 | 1.19  | 5.01 | 0.011658328 | 0.027107445 | radical SAM domain-containing protein                  |
| TGME49_208430 | 1.13  | 5.23 | 0.011724461 | 0.027218418 | serine proteinase inhibitor PI-2, putative             |
| TGME49_210960 | -1.20 | 6.30 | 0.011771802 | 0.027319744 | replication factor C subunit 4, putative               |
| TGME49_231930 | -2.67 | 4.73 | 0.011869558 | 0.027537971 | hypothetical protein                                   |
| TGME49_286510 | -1.62 | 5.50 | 0.011902661 | 0.027572741 | hypothetical protein                                   |
| TGME49_220260 | 1.22  | 5.44 | 0.011920663 | 0.027587287 | hypothetical protein                                   |
| TGME49_247240 | -1.21 | 6.78 | 0.011916601 | 0.027587287 | ubiquitin carboxyl-terminal hydrolase, family 1 protei |
| TGME49_242240 | -1.15 | 6.05 | 0.012127112 | 0.02801942  | rhopty kinase family protein ROP19A                    |
| TGME49_227920 | -1.40 | 5.69 | 0.012240514 | 0.028265571 | hypothetical protein                                   |

|               |       |      |             |             |                                                          |
|---------------|-------|------|-------------|-------------|----------------------------------------------------------|
| TGME49_225420 | -2.02 | 5.08 | 0.012252115 | 0.028279725 | histidine triad domain-containing protein                |
| TGME49_256910 | 1.28  | 5.85 | 0.012294318 | 0.028363242 | hypothetical protein                                     |
| TGME49_219850 | -1.03 | 8.47 | 0.012404611 | 0.028590928 | prolyl-tRNA synthetase (ProRS)                           |
| TGME49_248200 | 1.03  | 6.31 | 0.012409435 | 0.028593134 | ribosomal RNA (adenine(1779)-N(6)/adenine(1780)-N        |
| TGME49_238130 | -1.23 | 5.86 | 0.012494858 | 0.028772027 | hypothetical protein                                     |
| TGME49_273840 | -1.75 | 5.63 | 0.012535682 | 0.028848066 | brix domain-containing protein                           |
| TGME49_207950 | -1.42 | 5.76 | 0.01255318  | 0.028879345 | hypothetical protein                                     |
| TGME49_243310 | 1.37  | 6.29 | 0.012561479 | 0.028889448 | hypothetical protein                                     |
| TGME49_237840 | -1.42 | 5.52 | 0.012565937 | 0.028890716 | hypothetical protein                                     |
| TGME49_256920 | 1.22  | 6.24 | 0.012607514 | 0.02896829  | phosphatidylinositol-4-phosphate 5-Kinase                |
| TGME49_258550 | -1.36 | 5.48 | 0.012731707 | 0.029217331 | SAG-related sequence SRS28                               |
| TGME49_247370 | -1.40 | 5.45 | 0.012757125 | 0.029266578 | hypothetical protein                                     |
| TGME49_234520 | -1.54 | 5.92 | 0.01279096  | 0.029335098 | U2 snRNP auxilliary factor, large subunit, splicing fact |
| TGME49_257070 | -2.02 | 5.02 | 0.012830107 | 0.029406637 | hypothetical protein                                     |
| TGME49_263190 | -2.61 | 4.74 | 0.01282891  | 0.029406637 | adenylosuccinate lyase, putative                         |
| TGME49_213020 | 1.30  | 5.21 | 0.013134745 | 0.030030398 | hypothetical protein                                     |
| TGME49_295680 | -1.29 | 5.74 | 0.013130854 | 0.030030398 | periodic tryptophan protein PWP2, putative               |
| TGME49_269760 | 1.16  | 5.00 | 0.013195531 | 0.030150727 | 'chromo' (CHRromatin Organization MODifier) domai        |
| TGME49_289130 | -2.02 | 4.92 | 0.013193432 | 0.030150727 | hypothetical protein                                     |
| TGME49_255320 | 1.18  | 5.48 | 0.013286924 | 0.030309164 | mRNA turnover 4 (MRT4) family protein                    |
| TGME49_231625 | -1.76 | 4.86 | 0.013294168 | 0.030309164 | hypothetical protein                                     |
| TGME49_299030 | 1.06  | 7.26 | 0.013318972 | 0.030348376 | RNA recognition motif 2 protein                          |
| TGME49_206470 | 1.11  | 8.87 | 0.013364878 | 0.030424849 | pyruvate dehydrogenase complex subunit PDH-E3II          |
| TGME49_228010 | -1.53 | 5.18 | 0.013394635 | 0.030472265 | hypothetical protein                                     |
| TGME49_273500 | -1.78 | 5.42 | 0.013398071 | 0.030472265 | O-linked N-acetylglucosamine transferase                 |
| TGME49_263440 | -1.71 | 5.39 | 0.013435268 | 0.030538078 | hypothetical protein                                     |
| TGME49_235660 | -1.29 | 5.76 | 0.013603297 | 0.030891516 | hypothetical protein                                     |
| TGME49_305260 | -2.57 | 4.78 | 0.013614842 | 0.030898753 | hypothetical protein                                     |
| TGME49_312660 | -1.51 | 5.79 | 0.013756988 | 0.031163961 | hypothetical protein                                     |
| TGME49_256820 | -1.52 | 5.47 | 0.013775466 | 0.031177164 | zinc finger (CCCH type) motif-containing protein         |
| TGME49_269630 | 1.13  | 5.06 | 0.01378414  | 0.03118725  | hypothetical protein                                     |
| TGME49_243750 | 2.11  | 5.73 | 0.013841599 | 0.031298099 | tetratricopeptide repeat-containing protein              |
| TGME49_236990 | 1.16  | 5.51 | 0.01390239  | 0.031384699 | beta-ketoacyl synthase, N-terminal domain-containin      |
| TGME49_218000 | -1.71 | 5.14 | 0.013976744 | 0.03150733  | hypothetical protein                                     |
| TGME49_309940 | -1.30 | 5.91 | 0.014182457 | 0.031941847 | phospholipase D active site domain-containing protei     |
| TGME49_222870 | -1.16 | 6.27 | 0.014214822 | 0.031975781 | hypothetical protein                                     |
| TGME49_305460 | 1.60  | 6.98 | 0.0142746   | 0.032072385 | methionine aminopeptidase 2, putative                    |
| TGME49_217951 | -1.28 | 5.22 | 0.014398835 | 0.032330698 | hypothetical protein                                     |
| TGME49_272290 | -1.07 | 6.44 | 0.014411893 | 0.032340376 | pyruvate dehydrogenase complex subunit PD-HE1Be          |
| TGME49_267970 | -1.22 | 5.73 | 0.014442853 | 0.032400017 | DEAD/DEAH box helicase domain-containing protein         |
| TGME49_215100 | -1.38 | 5.36 | 0.014452878 | 0.032404534 | PP-loop family protein                                   |
| TGME49_219218 | -1.31 | 5.44 | 0.014679816 | 0.032851865 | hypothetical protein                                     |
| TGME49_237160 | -1.25 | 6.04 | 0.014767743 | 0.033028642 | hypothetical protein                                     |
| TGME49_230230 | 1.08  | 5.70 | 0.014875292 | 0.033208306 | hypothetical protein                                     |
| TGME49_216440 | 2.43  | 5.49 | 0.015080716 | 0.033610654 | OTU family cysteine protease                             |
| TGME49_238510 | -1.71 | 5.29 | 0.015403267 | 0.034212002 | hypothetical protein                                     |
| TGME49_233120 | -1.16 | 6.11 | 0.015740653 | 0.034929889 | AP2 domain transcription factor AP2VIII-2                |
| TGME49_275840 | -1.96 | 4.89 | 0.015759305 | 0.034960787 | protein phosphatase 2C domain-containing protein         |
| TGME49_220530 | 1.37  | 5.63 | 0.015769093 | 0.034972008 | AP2 domain transcription factor AP2V-1                   |
| TGME49_267460 | -1.97 | 4.87 | 0.015841671 | 0.035101384 | AP2 domain transcription factor AP2IX-1                  |
| TGME49_298050 | -1.36 | 5.70 | 0.015860673 | 0.035132959 | hypothetical protein                                     |
| TGME49_222430 | -1.27 | 5.65 | 0.015896904 | 0.035202668 | HECT-domain (ubiquitin-transferase) domain-contain       |
| TGME49_211730 | -1.55 | 7.28 | 0.015915165 | 0.035222008 | histone lysine methyltransferase SET8                    |
| TGME49_214740 | -1.09 | 6.15 | 0.015936971 | 0.035259715 | hypothetical protein                                     |
| TGME49_214990 | -1.36 | 5.69 | 0.015964027 | 0.03529845  | hypothetical protein                                     |

|               |       |      |             |             |                                                     |
|---------------|-------|------|-------------|-------------|-----------------------------------------------------|
| TGME49_254510 | 1.19  | 4.84 | 0.016188266 | 0.035730162 | ankyrin repeat-containing protein                   |
| TGME49_234470 | -1.36 | 5.77 | 0.016266731 | 0.035881924 | hypothetical protein                                |
| TGME49_253070 | -2.03 | 4.88 | 0.016276663 | 0.035886353 | hydrolase, TatD family protein                      |
| TGME49_289340 | 1.80  | 5.08 | 0.016297785 | 0.035907576 | hypothetical protein                                |
| TGME49_233245 | -1.96 | 4.98 | 0.016374925 | 0.036052168 | hypothetical protein                                |
| TGME49_207065 | -1.48 | 5.59 | 0.016570285 | 0.036431961 | hypothetical protein                                |
| TGME49_203280 | -1.98 | 5.13 | 0.016633489 | 0.036549188 | hypothetical protein                                |
| TGME49_220480 | -2.53 | 4.69 | 0.016631977 | 0.036549188 | hypothetical protein                                |
| TGME49_297080 | -1.48 | 5.34 | 0.016739682 | 0.036771601 | pyridoxal kinase                                    |
| TGME49_288700 | -1.11 | 6.08 | 0.016836162 | 0.036972553 | RecF/RecN/SMC N terminal domain-containing prote    |
| TGME49_278170 | -1.69 | 5.42 | 0.016889681 | 0.037079067 | hypothetical protein                                |
| TGME49_271610 | -1.05 | 5.94 | 0.016932639 | 0.037162343 | pyrroline-5-carboxylate reductase                   |
| TGME49_226240 | 1.13  | 5.14 | 0.0169814   | 0.037258301 | bud site selection protein, putative                |
| TGME49_231280 | 1.09  | 5.24 | 0.017039769 | 0.03736419  | WD domain, G-beta repeat-containing protein         |
| TGME49_262933 | -1.56 | 5.41 | 0.017091721 | 0.037433705 | hypothetical protein                                |
| TGME49_264420 | 2.95  | 4.97 | 0.017151343 | 0.037553162 | lipoprotein, putative                               |
| TGME49_286140 | -1.35 | 5.93 | 0.017185876 | 0.037617633 | hypothetical protein                                |
| TGME49_316770 | -1.34 | 5.68 | 0.017322708 | 0.037883498 | undecaprenyl diphosphate synthase                   |
| TGME49_267450 | -1.01 | 6.26 | 0.017419385 | 0.038039339 | alpha-tubulin suppressor protein                    |
| TGME49_279390 | -1.07 | 9.03 | 0.017465636 | 0.038117152 | proliferation-associated protein 2G4, putative      |
| TGME49_308930 | -1.24 | 5.90 | 0.017546926 | 0.038283261 | 50S ribosomal protein L33, putative                 |
| TGME49_268240 | 1.24  | 4.85 | 0.01757414  | 0.038308723 | hypothetical protein                                |
| TGME49_227820 | -1.10 | 6.10 | 0.017566566 | 0.038308723 | hypothetical protein                                |
| TGME49_228110 | -1.24 | 5.67 | 0.017589269 | 0.038330402 | hypothetical protein                                |
| TGME49_226068 | -1.02 | 6.39 | 0.017645615 | 0.038430539 | DnaJ domain-containing protein                      |
| TGME49_217900 | -1.14 | 6.15 | 0.017644452 | 0.038430539 | hypothetical protein                                |
| TGME49_257390 | -1.97 | 4.86 | 0.017794235 | 0.038720003 | ribosome biogenesis GTP-binding protein YsxC protei |
| TGME49_248770 | -1.51 | 5.27 | 0.017824789 | 0.038775077 | hypothetical protein                                |
| TGME49_236140 | 1.10  | 4.81 | 0.017846907 | 0.038800362 | hypothetical protein                                |
| TGME49_258010 | -1.52 | 5.57 | 0.017895722 | 0.038895052 | calcium signaling protein kinase RAD53, putative    |
| TGME49_216700 | -2.50 | 4.75 | 0.017948096 | 0.038985964 | hypothetical protein                                |
| TGME49_273130 | 1.43  | 6.10 | 0.018595829 | 0.040251042 | SAG-related sequence SRS30A                         |
| TGME49_231940 | -1.13 | 6.36 | 0.018593713 | 0.040251042 | ThiF family protein                                 |
| TGME49_273720 | -1.15 | 5.78 | 0.018739513 | 0.040514607 | hypothetical protein                                |
| TGME49_231220 | -1.93 | 4.89 | 0.018766528 | 0.040561154 | hypothetical protein                                |
| TGME49_218840 | -1.23 | 5.72 | 0.01884948  | 0.040716639 | mutS domain protein                                 |
| TGME49_283585 | 1.23  | 5.01 | 0.018909831 | 0.040811235 | hypothetical protein                                |
| TGME49_249770 | 1.47  | 5.99 | 0.018916986 | 0.040814763 | Nmda1 protein                                       |
| TGME49_229350 | -1.24 | 6.02 | 0.018997985 | 0.040953673 | HEAT repeat-containing protein                      |
| TGME49_291120 | -1.23 | 5.68 | 0.019026072 | 0.041002267 | trafficking protein mon1 subfamily protein          |
| TGME49_239070 | -1.47 | 5.50 | 0.019146791 | 0.041226375 | hypothetical protein                                |
| TGME49_287220 | 1.78  | 6.36 | 0.01924184  | 0.041394869 | hypothetical protein                                |
| TGME49_258826 | -1.74 | 5.07 | 0.019241358 | 0.041394869 | hypothetical protein                                |
| TGME49_267650 | -1.36 | 5.66 | 0.019319793 | 0.041524904 | hypothetical protein                                |
| TGME49_268290 | -2.00 | 4.85 | 0.019443757 | 0.041744234 | DEAD/DEAH box helicase domain-containing protein    |
| TGME49_226390 | 2.08  | 5.45 | 0.019469676 | 0.041785621 | hypothetical protein                                |
| TGME49_243910 | 1.05  | 6.24 | 0.01955587  | 0.041911914 | Cof family hydrolase subfamily protein              |
| TGME49_219230 | -1.11 | 6.00 | 0.019882144 | 0.0425126   | AMP-binding enzyme domain-containing protein        |
| TGME49_255660 | -1.14 | 6.24 | 0.020127349 | 0.042962361 | EF hand domain-containing protein                   |
| TGME49_299015 | -6.90 | 4.85 | 0.020226484 | 0.04312417  | hypothetical protein                                |
| TGME49_242110 | -6.77 | 4.87 | 0.020318873 | 0.04329618  | rhophry kinase family protein ROP38                 |
| TGME49_232310 | -1.63 | 5.22 | 0.020405921 | 0.043444105 | endonuclease/exonuclease/phosphatase family prote   |
| TGME49_277680 | -1.13 | 6.15 | 0.020490312 | 0.043611216 | hypothetical protein                                |
| TGME49_270070 | 2.20  | 4.92 | 0.020583888 | 0.043772583 | synaptobrevin family protein                        |
| TGME49_267390 | -1.02 | 6.54 | 0.020623539 | 0.04383169  | DNA-directed RNA polymerase I RPAC1                 |

|               |       |      |             |             |                                                       |
|---------------|-------|------|-------------|-------------|-------------------------------------------------------|
| TGME49_240700 | -1.21 | 5.96 | 0.020779174 | 0.044137091 | ubiquitin family protein                              |
| TGME49_210440 | 1.04  | 6.10 | 0.020874685 | 0.044263672 | polynucleotide adenylyltransferase                    |
| TGME49_217000 | -1.21 | 5.87 | 0.020883682 | 0.044270052 | hypothetical protein                                  |
| TGME49_228380 | 2.35  | 5.03 | 0.021125391 | 0.044679959 | hypothetical protein                                  |
| TGME49_242880 | -1.61 | 5.25 | 0.021184832 | 0.044792866 | flavoprotein                                          |
| TGME49_270300 | 1.54  | 6.74 | 0.021243675 | 0.044891608 | hypothetical protein                                  |
| TGME49_232590 | 1.28  | 6.36 | 0.021383923 | 0.045162161 | glutamate-cysteine ligase, catalytic subunit domain-c |
| TGME49_229200 | -1.32 | 5.54 | 0.021566084 | 0.045481924 | hypothetical protein                                  |
| TGME49_230140 | -1.13 | 5.82 | 0.021712654 | 0.045699791 | vacuolar sorting protein 9 (vps9) domain-containing p |
| TGME49_294420 | -1.89 | 4.78 | 0.021734708 | 0.04572018  | programmed cell death protein 2, c-terminal domain    |
| TGME49_249550 | -1.14 | 5.76 | 0.021819057 | 0.045845801 | hypothetical protein                                  |
| TGME49_319600 | -1.17 | 5.53 | 0.021853669 | 0.045905122 | alpha-tubulin N-acetyltransferase, putative           |
| TGME49_262700 | 1.19  | 6.44 | 0.021882961 | 0.045942243 | tetratricopeptide repeat-containing protein           |
| TGME49_306590 | 1.35  | 6.35 | 0.021986471 | 0.046129273 | hypothetical protein                                  |
| TGME49_205550 | -1.43 | 5.44 | 0.022182214 | 0.046476421 | AGC kinase                                            |
| TGME49_225190 | 2.20  | 4.76 | 0.022626583 | 0.047300241 | hypothetical protein                                  |
| TGME49_217340 | -1.15 | 5.87 | 0.022864507 | 0.047703207 | hypothetical protein                                  |
| TGME49_200460 | 1.18  | 6.56 | 0.02304527  | 0.048053221 | hypothetical protein                                  |
| TGME49_264670 | -1.01 | 6.15 | 0.023163067 | 0.048230841 | DNA polymerase family B protein                       |
| TGME49_316490 | 1.24  | 5.08 | 0.023199568 | 0.048279653 | hypothetical protein                                  |
| TGME49_313530 | -1.06 | 5.98 | 0.023314296 | 0.048463847 | transmembrane protein 167, putative                   |
| TGME49_245530 | 2.09  | 5.75 | 0.023328531 | 0.048479809 | hypothetical protein                                  |
| TGME49_231870 | -1.60 | 5.18 | 0.023339488 | 0.04848895  | tetratricopeptide repeat-containing protein           |
| TGME49_208850 | -1.13 | 5.79 | 0.02341156  | 0.048606106 | SAG-related sequence SRS11                            |
| TGME49_314390 | -1.19 | 5.75 | 0.023441938 | 0.048647121 | hypothetical protein                                  |
| TGME49_213690 | -1.28 | 5.66 | 0.024089887 | 0.049865796 | ring box protein 1 family protein                     |
| TGME49_257980 | 2.23  | 4.93 | 0.024102311 | 0.049870321 | ribosome recycling factor protein                     |
| TGME49_320690 | -1.29 | 5.76 | 0.024112307 | 0.049870321 | gamma-soluble NSF attachment protein, putative        |

**Supplementary Table S7C: Differential expression analysis of *T. gondii* genes from neuronal stem cells infected with *T. gondii* EGS strain for 18 hours compared to *T. gondii* gene expression from neuronal stem cells infected with VEG strain for 18 hours.**

| gene ID       | logFC (EGS/VEG) | logCPM | PValue    | FDR       | Product Name                                          |
|---------------|-----------------|--------|-----------|-----------|-------------------------------------------------------|
| TGME49_233925 | 9.00            | 7.83   | 1.77E-211 | 1.31E-207 | hypothetical protein                                  |
| TGME49_322200 | 12.41           | 6.70   | 2.90E-166 | 1.07E-162 | apocytochrome b, putative                             |
| TGME49_237130 | 10.14           | 10.26  | 1.50E-137 | 3.70E-134 | cytochrome b, putative                                |
| TGME49_322800 | 12.26           | 6.48   | 5.08E-113 | 9.40E-110 | hypothetical protein                                  |
| TGME49_330000 | 10.97           | 10.23  | 6.79E-110 | 1.00E-106 | cytochrome b                                          |
| TGME49_205250 | 11.29           | 9.21   | 5.03E-106 | 6.20E-103 | rhostry protein ROP18                                 |
| TGME49_323400 | 10.92           | 9.06   | 1.40E-104 | 1.47E-101 | cytochrome c oxidase subunit iii subfamily protein    |
| TGME49_320050 | 4.35            | 13.43  | 5.09E-83  | 4.70E-80  | ribosomal protein RPL5                                |
| TGME49_302055 | 11.93           | 5.97   | 3.07E-81  | 2.52E-78  | ribosomal protein RPS12                               |
| TGME49_255060 | 10.42           | 9.95   | 4.80E-72  | 3.55E-69  | cytochrome b(N-terminal)/b6/petB subfamily protein    |
| TGME49_293790 | 8.48            | 6.72   | 3.82E-60  | 2.57E-57  | hypothetical protein                                  |
| TGME49_238240 | 2.64            | 8.97   | 1.06E-58  | 6.55E-56  | bystin protein                                        |
| TGME49_261240 | 5.94            | 5.02   | 7.31E-58  | 4.16E-55  | histone H3                                            |
| TGME49_214080 | 6.66            | 8.38   | 3.20E-57  | 1.69E-54  | toxofilin                                             |
| TGME49_290600 | 2.50            | 9.11   | 1.80E-56  | 8.88E-54  | succinyl-CoA-synthetase alpha SCSA                    |
| TGME49_232955 | 13.87           | 12.33  | 9.24E-55  | 4.27E-52  | hypothetical protein                                  |
| TGME49_321360 | 2.94            | 8.21   | 2.13E-53  | 9.27E-51  | clustered-asparagine-rich protein                     |
| TGME49_301250 | 8.14            | 14.41  | 2.88E-52  | 1.18E-49  | hypothetical protein                                  |
| TGME49_288360 | -3.81           | 10.08  | 3.39E-50  | 1.32E-47  | tryptophanyl-tRNA synthetase (TrpRS2)                 |
| TGME49_221840 | 6.21            | 4.71   | 5.34E-47  | 1.98E-44  | hypothetical protein                                  |
| TGME49_217530 | 4.18            | 6.35   | 4.73E-43  | 1.66E-40  | hypothetical protein                                  |
| TGME49_277230 | 3.76            | 5.63   | 7.71E-40  | 2.59E-37  | hypothetical protein                                  |
| TGME49_252070 | 10.19           | 5.12   | 5.10E-39  | 1.64E-36  | KRUF family protein                                   |
| TGME49_262690 | 1.88            | 10.98  | 5.67E-36  | 1.75E-33  | ribosomal protein RPL27                               |
| TGME49_261720 | -6.53           | 7.82   | 2.19E-35  | 6.46E-33  | metal cation transporter, ZIP family protein          |
| TGME49_223660 | 3.20            | 7.34   | 2.18E-34  | 6.19E-32  | 50S ribosomal protein L4, putative                    |
| TGME49_208020 | 4.25            | 6.12   | 7.27E-33  | 1.99E-30  | AP2 domain transcription factor AP2Ib-1               |
| TGME49_251180 | 2.68            | 6.80   | 2.56E-31  | 6.75E-29  | KRUF family protein                                   |
| TGME49_228160 | 2.44            | 7.19   | 5.22E-31  | 1.33E-28  | acid phosphatase                                      |
| TGME49_244370 | 3.44            | 8.80   | 7.15E-31  | 1.76E-28  | TDC1, putative                                        |
| TGME49_269310 | 5.30            | 4.71   | 1.18E-30  | 2.72E-28  | hypothetical protein                                  |
| TGME49_315885 | 2.61            | 7.08   | 2.99E-28  | 6.50E-26  | glycosyltransferase, putative                         |
| TGME49_260430 | 4.88            | 4.67   | 4.52E-28  | 9.54E-26  | hypothetical protein                                  |
| TGME49_206550 | 7.43            | 6.05   | 1.71E-27  | 3.42E-25  | hypothetical protein                                  |
| TGME49_251400 | 3.02            | 6.13   | 1.78E-27  | 3.46E-25  | hypothetical protein                                  |
| TGME49_275870 | 4.24            | 5.59   | 4.42E-27  | 8.38E-25  | tubulin/FtsZ family, GTPase domain-containing protein |
| TGME49_266050 | 2.37            | 7.09   | 4.54E-27  | 8.39E-25  | hypothetical protein                                  |
| TGME49_211695 | 3.16            | 5.62   | 4.06E-26  | 7.31E-24  | hypothetical protein                                  |
| TGME49_301222 | 3.48            | 6.56   | 3.10E-25  | 5.47E-23  | DNA repair protein Rad4 domain-containing protein     |
| TGME49_293780 | 3.35            | 7.14   | 3.20E-25  | 5.50E-23  | hypothetical protein                                  |
| TGME49_280570 | 6.96            | 6.81   | 3.82E-25  | 6.42E-23  | SAG-related sequence SRS35A                           |
| TGME49_278080 | 7.20            | 5.22   | 4.04E-25  | 6.63E-23  | Toxoplasma gondii family A protein                    |
| TGME49_286460 | 5.01            | 5.00   | 8.77E-25  | 1.41E-22  | hypothetical protein                                  |
| TGME49_277260 | 1.81            | 9.53   | 2.43E-24  | 3.83E-22  | hypothetical protein                                  |
| TGME49_229010 | -2.37           | 9.17   | 4.59E-24  | 7.07E-22  | rhostry neck protein RON4                             |
| TGME49_252430 | 2.15            | 8.12   | 2.73E-23  | 4.12E-21  | hypothetical protein                                  |
| TGME49_208740 | 1.85            | 9.88   | 8.37E-23  | 1.24E-20  | microneme protein, putative                           |
| TGME49_314500 | -3.32           | 8.36   | 1.18E-22  | 1.71E-20  | subtilisin SUB2                                       |

|               |        |       |          |          |                                                             |
|---------------|--------|-------|----------|----------|-------------------------------------------------------------|
| TGME49_244280 | -2.12  | 10.21 | 1.34E-22 | 1.90E-20 | hypothetical protein                                        |
| TGME49_243615 | 3.29   | 5.68  | 4.78E-22 | 6.67E-20 | hypothetical protein                                        |
| TGME49_253170 | 2.14   | 7.37  | 9.51E-22 | 1.30E-19 | zinc carboxypeptidase, putative                             |
| TGME49_202020 | 4.47   | 6.95  | 1.11E-21 | 1.49E-19 | DnAK-TPR                                                    |
| TGME49_291040 | 8.36   | 6.75  | 2.65E-21 | 3.40E-19 | lactate dehydrogenase LDH2                                  |
| TGME49_275640 | 2.21   | 6.94  | 2.67E-21 | 3.40E-19 | hypothetical protein                                        |
| TGME49_201170 | -2.77  | 8.67  | 3.76E-21 | 4.72E-19 | hypothetical protein                                        |
| TGME49_290020 | 2.27   | 6.64  | 6.27E-21 | 7.48E-19 | cyclin dependent kinase binding protein                     |
| TGME49_217820 | -3.27  | 7.71  | 8.28E-21 | 9.72E-19 | PCI domain-containing protein                               |
| TGME49_207210 | 6.79   | 6.73  | 1.08E-20 | 1.24E-18 | hypothetical protein                                        |
| TGME49_293170 | -5.65  | 7.60  | 1.65E-20 | 1.87E-18 | hypothetical protein                                        |
| TGME49_208370 | 1.58   | 8.84  | 3.60E-20 | 4.03E-18 | myosin heavy chain, putative                                |
| TGME49_319350 | -1.78  | 9.36  | 6.67E-20 | 7.36E-18 | SAG-related sequence SRS17B                                 |
| TGME49_259550 | -3.33  | 7.66  | 1.22E-19 | 1.31E-17 | dihydropteroate synthase                                    |
| TGME49_290270 | 2.17   | 6.58  | 1.33E-19 | 1.41E-17 | SPRY domain-containing protein                              |
| TGME49_259260 | -2.61  | 9.01  | 2.65E-19 | 2.76E-17 | membrane protein FtsH1                                      |
| TGME49_306670 | -3.72  | 7.92  | 5.90E-19 | 6.06E-17 | hypothetical protein                                        |
| TGME49_269330 | -10.60 | 7.07  | 7.00E-19 | 7.09E-17 | hypothetical protein                                        |
| TGME49_211030 | -3.41  | 8.15  | 7.59E-19 | 7.58E-17 | hypothetical protein                                        |
| TGME49_234510 | 2.08   | 6.89  | 1.04E-18 | 1.02E-16 | ankyrin repeat-containing protein                           |
| TGME49_277000 | -4.77  | 7.32  | 1.76E-18 | 1.67E-16 | transport protein Sec24, putative                           |
| TGME49_226100 | 6.20   | 5.74  | 1.79E-18 | 1.68E-16 | haloacid dehalogenase family hydrolase domain-contain       |
| TGME49_200320 | -3.25  | 7.39  | 1.87E-18 | 1.73E-16 | hypoxanthine-xanthine-guanine phosphoribosyl transfer       |
| TGME49_293480 | 3.17   | 7.15  | 2.46E-18 | 2.24E-16 | MoeA N-terminal region (domain I and II) domain-conta       |
| TGME49_293570 | -3.13  | 7.85  | 2.63E-18 | 2.37E-16 | translocation protein sec62, putative                       |
| TGME49_223930 | 1.70   | 8.26  | 2.95E-18 | 2.63E-16 | RNA recognition motif-containing protein                    |
| TGME49_230830 | 4.39   | 5.63  | 3.64E-18 | 3.20E-16 | ATPase family associated with various cellular activities ( |
| TGME49_310750 | -2.52  | 8.35  | 4.48E-18 | 3.89E-16 | emp24/gp25L/p24 family protein                              |
| TGME49_280580 | 4.14   | 5.84  | 4.70E-18 | 4.02E-16 | SAG-related sequence SRS35B                                 |
| TGME49_273320 | 1.83   | 7.86  | 4.73E-18 | 4.02E-16 | hypothetical protein                                        |
| TGME49_207880 | -10.92 | 6.72  | 6.95E-18 | 5.84E-16 | hypothetical protein                                        |
| TGME49_207680 | -4.57  | 7.02  | 7.69E-18 | 6.39E-16 | suppressor of kinetochore protein 1, putative               |
| TGME49_239790 | -10.51 | 7.09  | 8.32E-18 | 6.83E-16 | BRCA1 C Terminus (BRCT) domain-containing protein           |
| TGME49_320190 | 8.02   | 6.30  | 8.59E-18 | 6.98E-16 | SAG-related sequence SRS16B                                 |
| TGME49_287460 | 3.08   | 4.88  | 1.34E-17 | 1.08E-15 | hypothetical protein                                        |
| TGME49_254080 | 1.59   | 7.96  | 1.69E-17 | 1.34E-15 | metal cation transporter, ZIP family protein                |
| TGME49_278510 | -2.92  | 7.68  | 1.71E-17 | 1.34E-15 | protein phosphatase 2C domain-containing protein            |
| TGME49_315620 | -5.42  | 7.07  | 1.79E-17 | 1.39E-15 | vacuolar ATP synthase subunit C, putative                   |
| TGME49_255650 | -10.91 | 7.05  | 2.03E-17 | 1.56E-15 | DHHC zinc finger domain-containing protein                  |
| TGME49_254730 | 2.50   | 6.04  | 2.34E-17 | 1.79E-15 | POPLD (NUC188) domain-containing protein                    |
| TGME49_224760 | 3.19   | 4.85  | 2.44E-17 | 1.84E-15 | SAG-related sequence SRS40E                                 |
| TGME49_305160 | 2.96   | 4.99  | 3.34E-17 | 2.50E-15 | histone H2Ba                                                |
| TGME49_236910 | -4.60  | 7.47  | 3.76E-17 | 2.78E-15 | U2 snRNP auxiliary factor, putative                         |
| TGME49_270510 | -1.78  | 9.75  | 4.00E-17 | 2.93E-15 | asparaginyl-tRNA synthetase (NOB+tRNA synthase)             |
| TGME49_213570 | 1.39   | 8.76  | 4.17E-17 | 3.00E-15 | hypothetical protein                                        |
| TGME49_260500 | -2.19  | 9.04  | 4.15E-17 | 3.00E-15 | COPI associated protein, putative                           |
| TGME49_238950 | -2.83  | 9.10  | 4.96E-17 | 3.53E-15 | fatty acyl-CoA desaturase, putative                         |
| TGME49_240650 | -2.44  | 8.44  | 5.83E-17 | 4.11E-15 | coatomer protein complex, subunit alpha, putative           |
| TGME49_236670 | 3.04   | 6.27  | 6.14E-17 | 4.24E-15 | hypothetical protein                                        |
| TGME49_319308 | -4.12  | 6.63  | 6.20E-17 | 4.24E-15 | hypothetical protein                                        |
| TGME49_229690 | -10.43 | 6.55  | 6.19E-17 | 4.24E-15 | autophagy-related protein 7 atg7, putative                  |
| TGME49_214410 | 3.26   | 7.77  | 6.74E-17 | 4.57E-15 | hypothetical protein                                        |
| TGME49_214575 | 2.55   | 5.96  | 8.67E-17 | 5.83E-15 | hypothetical protein                                        |
| TGME49_245432 | 2.68   | 7.36  | 1.07E-16 | 7.11E-15 | hypothetical protein                                        |
| TGME49_228690 | -5.44  | 7.16  | 1.08E-16 | 7.11E-15 | phosphatidylinositol 3- and 4-kinase                        |
| TGME49_271935 | 1.85   | 6.69  | 1.17E-16 | 7.67E-15 | hypothetical protein                                        |
| TGME49_251740 | -3.65  | 7.43  | 1.41E-16 | 9.11E-15 | AP2 domain transcription factor AP2XII-9                    |

|               |        |       |          |          |                                                             |
|---------------|--------|-------|----------|----------|-------------------------------------------------------------|
| TGME49_222380 | -2.57  | 8.13  | 1.48E-16 | 9.49E-15 | importin-beta N-terminal domain-containing protein          |
| TGME49_249350 | -10.39 | 6.75  | 1.79E-16 | 1.14E-14 | esterase/lipase/thioesterase domain-containing protein      |
| TGME49_293280 | 2.97   | 5.89  | 1.90E-16 | 1.20E-14 | cyclin protein                                              |
| TGME49_289170 | 4.85   | 5.24  | 1.93E-16 | 1.21E-14 | adenylate and guanylate cyclase catalytic domain-contai     |
| TGME49_204520 | 3.39   | 4.97  | 2.42E-16 | 1.51E-14 | hypothetical protein                                        |
| TGME49_250030 | 2.94   | 5.24  | 2.45E-16 | 1.51E-14 | hypothetical protein                                        |
| TGME49_215390 | 3.43   | 4.82  | 2.85E-16 | 1.74E-14 | TIM10 family protein, putative                              |
| TGME49_319500 | -10.47 | 7.06  | 3.76E-16 | 2.28E-14 | hypothetical protein                                        |
| TGME49_275860 | 2.23   | 9.46  | 4.97E-16 | 2.97E-14 | hypothetical protein                                        |
| TGME49_207460 | 1.67   | 7.42  | 4.98E-16 | 2.97E-14 | Rab5B protein                                               |
| TGME49_232650 | 2.06   | 6.75  | 5.37E-16 | 3.18E-14 | hypothetical protein                                        |
| TGME49_220250 | 1.84   | 6.94  | 5.73E-16 | 3.36E-14 | Nucleotide-sensitive chloride conductance regulator (ICI    |
| TGME49_239440 | -10.36 | 6.88  | 6.76E-16 | 3.94E-14 | protein kinase (incomplete catalytic triad)                 |
| TGME49_241830 | 2.35   | 5.87  | 6.82E-16 | 3.94E-14 | peptidyl-prolyl cis-trans isomerase                         |
| TGME49_205200 | 1.97   | 6.83  | 7.16E-16 | 4.10E-14 | hypothetical protein                                        |
| TGME49_270360 | -5.33  | 7.03  | 7.70E-16 | 4.38E-14 | hypothetical protein                                        |
| TGME49_249540 | 1.71   | 7.36  | 9.75E-16 | 5.50E-14 | hypothetical protein                                        |
| TGME49_254120 | 1.94   | 8.30  | 1.20E-15 | 6.74E-14 | autophagy-related protein 8 atg8, putative                  |
| TGME49_216335 | 3.61   | 5.08  | 1.36E-15 | 7.53E-14 | hypothetical protein                                        |
| TGME49_242290 | -2.68  | 7.99  | 1.42E-15 | 7.76E-14 | proteasome subunit alpha1, putative                         |
| TGME49_246490 | -2.68  | 7.46  | 1.45E-15 | 7.87E-14 | hypothetical protein                                        |
| TGME49_239410 | -2.59  | 7.90  | 1.48E-15 | 8.01E-14 | hypothetical protein                                        |
| TGME49_253860 | 1.66   | 7.25  | 1.92E-15 | 1.03E-13 | Tyrosine kinase-like (TKL) protein                          |
| TGME49_318610 | 3.56   | 5.24  | 1.96E-15 | 1.04E-13 | AP2 domain transcription factor AP2IV-3                     |
| TGME49_306660 | 1.73   | 7.88  | 2.28E-15 | 1.20E-13 | RNA pseudouridine synthase superfamily protein              |
| TGME49_243580 | -4.10  | 7.20  | 2.45E-15 | 1.28E-13 | Hit family protein involved in cell-cycle regulation, putat |
| TGME49_200350 | 3.55   | 5.77  | 2.51E-15 | 1.31E-13 | subtilisin SUB3                                             |
| TGME49_212880 | -2.83  | 7.91  | 2.65E-15 | 1.37E-13 | surface antigen repeat-containing protein                   |
| TGME49_205380 | -2.23  | 7.80  | 3.26E-15 | 1.67E-13 | fructose-bisphosphatase I                                   |
| TGME49_208530 | -3.36  | 7.28  | 3.68E-15 | 1.87E-13 | nicotinate phosphoribosyltransferase                        |
| TGME49_265190 | -4.37  | 7.20  | 3.93E-15 | 1.99E-13 | Ulp1 protease family, C-terminal catalytic domain-contai    |
| TGME49_209050 | -10.25 | 6.78  | 4.09E-15 | 2.06E-13 | Tyrosine kinase-like (TKL) protein                          |
| TGME49_219520 | -2.64  | 7.68  | 4.42E-15 | 2.19E-13 | histone arginine methyltransferase PRMT1                    |
| TGME49_235130 | -3.97  | 7.38  | 4.42E-15 | 2.19E-13 | transmembrane protein                                       |
| TGME49_212250 | 2.42   | 7.68  | 4.76E-15 | 2.34E-13 | XPG N-terminal domain-containing protein                    |
| TGME49_228280 | 2.53   | 5.71  | 4.96E-15 | 2.43E-13 | hypothetical protein                                        |
| TGME49_240880 | 3.30   | 5.88  | 5.02E-15 | 2.44E-13 | hypothetical protein                                        |
| TGME49_311230 | 1.23   | 9.99  | 5.06E-15 | 2.44E-13 | hypothetical protein                                        |
| TGME49_212900 | 1.72   | 8.11  | 6.29E-15 | 3.02E-13 | hypothetical protein                                        |
| TGME49_254710 | 1.52   | 7.81  | 6.35E-15 | 3.03E-13 | serine esterase (DUF676) protein                            |
| TGME49_203300 | 2.96   | 7.42  | 6.72E-15 | 3.18E-13 | hypothetical protein                                        |
| TGME49_293410 | 2.64   | 5.32  | 6.99E-15 | 3.29E-13 | hypothetical protein                                        |
| TGME49_218520 | 1.22   | 10.33 | 9.07E-15 | 4.22E-13 | microneme protein MIC6                                      |
| TGME49_263870 | -5.22  | 6.97  | 9.81E-15 | 4.53E-13 | glutamate-tRNA ligase                                       |
| TGME49_253690 | 1.24   | 8.98  | 1.04E-14 | 4.71E-13 | hypothetical protein                                        |
| TGME49_261520 | -5.14  | 7.04  | 1.03E-14 | 4.71E-13 | nucleolar GTP-binding protein 1, putative                   |
| TGME49_287170 | -10.29 | 7.07  | 1.04E-14 | 4.71E-13 | hypothetical protein                                        |
| TGME49_250820 | -2.94  | 7.50  | 1.25E-14 | 5.64E-13 | hypothetical protein                                        |
| TGME49_259710 | -3.61  | 7.07  | 1.34E-14 | 6.02E-13 | protein kinase                                              |
| TGME49_316280 | -5.19  | 6.90  | 1.37E-14 | 6.11E-13 | transporter, major facilitator family protein               |
| TGME49_270700 | 1.62   | 7.08  | 1.40E-14 | 6.19E-13 | hypothetical protein                                        |
| TGME49_290200 | -2.00  | 8.88  | 1.50E-14 | 6.55E-13 | NAD/NADP octopine/nopaline dehydrogenase, alpha-he          |
| TGME49_258150 | -2.22  | 7.78  | 1.49E-14 | 6.55E-13 | proteasome subunit alpha type 7, putative                   |
| TGME49_278830 | -1.79  | 8.52  | 1.66E-14 | 7.21E-13 | glucose-6-phosphate 1-dehydrogenase                         |
| TGME49_216140 | 2.32   | 7.52  | 1.67E-14 | 7.21E-13 | tetratricopeptide repeat-containing protein                 |
| TGME49_226960 | -1.58  | 9.46  | 1.72E-14 | 7.41E-13 | phosphofructokinase PFKII                                   |
| TGME49_223480 | -10.14 | 5.77  | 1.95E-14 | 8.33E-13 | sushi domain (scr repeat) domain-containing protein         |

|               |        |       |          |          |                                                          |
|---------------|--------|-------|----------|----------|----------------------------------------------------------|
| TGME49_255210 | 3.10   | 6.02  | 2.00E-14 | 8.50E-13 | ATPase, AAA family protein                               |
| TGME49_254050 | 1.82   | 6.83  | 2.29E-14 | 9.66E-13 | optic atrophy 3 protein (opa3) protein                   |
| TGME49_306060 | -1.59  | 9.70  | 2.37E-14 | 9.91E-13 | rhoptry neck protein RON8                                |
| TGME49_300220 | -3.26  | 7.60  | 2.36E-14 | 9.91E-13 | hypothetical protein                                     |
| TGME49_278870 | -1.81  | 8.87  | 2.40E-14 | 9.99E-13 | myosin F                                                 |
| TGME49_235630 | 1.72   | 7.24  | 2.90E-14 | 1.19E-12 | hypothetical protein                                     |
| TGME49_294770 | -5.13  | 6.84  | 2.97E-14 | 1.22E-12 | Armadillo/beta-catenin family repeat-containing protein  |
| TGME49_236990 | 4.01   | 5.51  | 3.16E-14 | 1.28E-12 | beta-ketoacyl synthase, N-terminal domain-containing p   |
| TGME49_250340 | -2.60  | 7.79  | 3.18E-14 | 1.29E-12 | centrin 2                                                |
| TGME49_316660 | -10.13 | 6.50  | 3.37E-14 | 1.36E-12 | cullin family protein                                    |
| TGME49_218910 | 3.84   | 5.24  | 3.78E-14 | 1.51E-12 | hypothetical protein                                     |
| TGME49_205010 | -2.55  | 7.49  | 4.43E-14 | 1.76E-12 | U2 small nuclear ribonucleoprotein family protein, putat |
| TGME49_259010 | -5.10  | 6.71  | 4.64E-14 | 1.83E-12 | vacuolar ATP synthase subunit d, putative                |
| TGME49_214980 | 1.39   | 8.41  | 4.70E-14 | 1.85E-12 | hypothetical protein                                     |
| TGME49_294630 | -2.37  | 7.75  | 4.78E-14 | 1.87E-12 | hypothetical protein                                     |
| TGME49_245510 | -2.73  | 7.52  | 5.06E-14 | 1.97E-12 | phospholipid-translocating P-type ATPase, flippase subfa |
| TGME49_268176 | -3.25  | 7.14  | 5.09E-14 | 1.97E-12 | hypothetical protein                                     |
| TGME49_305590 | -4.21  | 6.99  | 5.63E-14 | 2.16E-12 | ABC transporter transmembrane region domain-contain      |
| TGME49_246330 | -5.17  | 7.00  | 5.63E-14 | 2.16E-12 | CRAL/TRIO domain-containing protein                      |
| TGME49_202420 | 1.97   | 6.26  | 5.77E-14 | 2.20E-12 | hypothetical protein                                     |
| TGME49_291680 | -2.05  | 7.77  | 6.62E-14 | 2.51E-12 | Sec23/Sec24 trunk domain-containing protein              |
| TGME49_313020 | -4.21  | 6.61  | 6.95E-14 | 2.62E-12 | STAS domain-containing protein                           |
| TGME49_270670 | 3.19   | 5.21  | 7.01E-14 | 2.63E-12 | hypothetical protein                                     |
| TGME49_315320 | -1.69  | 9.24  | 8.33E-14 | 3.11E-12 | SAG-related sequence SRS52A                              |
| TGME49_293190 | -3.24  | 7.38  | 8.74E-14 | 3.25E-12 | endonuclease/exonuclease/phosphatase family protein      |
| TGME49_304740 | 1.38   | 8.67  | 9.35E-14 | 3.46E-12 | rhoptry kinase family protein ROP35                      |
| TGME49_231150 | 2.83   | 5.08  | 1.02E-13 | 3.76E-12 | hypothetical protein                                     |
| TGME49_275755 | 3.34   | 4.98  | 1.08E-13 | 3.95E-12 | hypothetical protein                                     |
| TGME49_254620 | 1.17   | 9.19  | 1.14E-13 | 4.15E-12 | ribosomal protein RPL39                                  |
| TGME49_221470 | -2.15  | 8.22  | 1.17E-13 | 4.24E-12 | hypothetical protein                                     |
| TGME49_213620 | 3.04   | 5.49  | 1.52E-13 | 5.47E-12 | ABC1 family protein                                      |
| TGME49_265870 | -3.80  | 6.97  | 2.07E-13 | 7.40E-12 | pantoate-beta-alanine ligase                             |
| TGME49_318750 | 2.56   | 5.79  | 2.09E-13 | 7.42E-12 | deoxyribose-phosphate aldolase                           |
| TGME49_233450 | 1.37   | 8.00  | 2.39E-13 | 8.47E-12 | SAG-related sequence SRS29A                              |
| TGME49_210300 | -5.07  | 6.98  | 2.59E-13 | 9.11E-12 | hypothetical protein                                     |
| TGME49_218530 | -10.01 | 6.40  | 2.71E-13 | 9.50E-12 | proteasome-interacting thioredoxin domain-containing p   |
| TGME49_272370 | 1.71   | 7.74  | 2.76E-13 | 9.62E-12 | hypothetical protein                                     |
| TGME49_253750 | 2.28   | 8.98  | 2.85E-13 | 9.86E-12 | PLU-1 family protein                                     |
| TGME49_231410 | -2.50  | 8.15  | 2.85E-13 | 9.86E-12 | hypothetical protein                                     |
| TGME49_223050 | -1.58  | 9.44  | 3.12E-13 | 1.07E-11 | ribosomal protein RPS20                                  |
| TGME49_306620 | 3.84   | 6.62  | 3.70E-13 | 1.25E-11 | AP2 domain transcription factor AP2IX-9                  |
| TGME49_282220 | 1.93   | 6.58  | 3.70E-13 | 1.25E-11 | AP2 domain transcription factor AP2VIIa-9                |
| TGME49_237230 | 1.26   | 9.81  | 3.68E-13 | 1.25E-11 | hypothetical protein                                     |
| TGME49_245980 | 3.58   | 7.53  | 3.72E-13 | 1.26E-11 | hypothetical protein                                     |
| TGME49_294550 | -2.09  | 8.00  | 4.67E-13 | 1.56E-11 | dynein heavy chain                                       |
| TGME49_247460 | -1.81  | 8.51  | 7.16E-13 | 2.39E-11 | proliferating cell nuclear antigen PCNA1                 |
| TGME49_292920 | -2.22  | 7.96  | 7.23E-13 | 2.40E-11 | heat shock protein 75, putative                          |
| TGME49_286120 | -2.35  | 8.02  | 7.79E-13 | 2.57E-11 | prolyl endopeptidase                                     |
| TGME49_242118 | -9.98  | 5.88  | 8.02E-13 | 2.64E-11 | myosin-light-chain kinase                                |
| TGME49_252880 | -2.78  | 7.29  | 8.38E-13 | 2.74E-11 | hypothetical protein                                     |
| TGME49_246580 | -4.08  | 6.71  | 9.38E-13 | 3.06E-11 | hypothetical protein                                     |
| TGME49_240280 | -2.45  | 7.78  | 1.02E-12 | 3.31E-11 | S1/P1nuclease                                            |
| TGME49_238100 | -2.61  | 7.30  | 1.07E-12 | 3.42E-11 | transmembrane protein                                    |
| TGME49_244910 | -4.11  | 6.82  | 1.07E-12 | 3.42E-11 | MIZ/SP-RING zinc finger domain-containing protein        |
| TGME49_311720 | -1.30  | 11.50 | 1.09E-12 | 3.48E-11 | chaperonin protein BiP                                   |
| TGME49_257700 | 3.22   | 5.46  | 1.22E-12 | 3.86E-11 | hypothetical protein                                     |
| TGME49_305180 | -9.93  | 6.43  | 1.28E-12 | 4.04E-11 | Na <sup>+</sup> /H <sup>+</sup> exchanger NHE3           |



|               |        |       |          |          |                                                                    |
|---------------|--------|-------|----------|----------|--------------------------------------------------------------------|
| TGME49_254870 | 1.70   | 6.87  | 1.39E-12 | 4.38E-11 | hypothetical protein                                               |
| TGME49_214350 | -2.94  | 7.39  | 1.40E-12 | 4.38E-11 | GTP-binding protein, putative                                      |
| TGME49_244880 | -4.08  | 6.91  | 1.47E-12 | 4.58E-11 | DNA-directed RNA polymerase I RPA1                                 |
| TGME49_253790 | 1.73   | 7.54  | 1.51E-12 | 4.68E-11 | zinc finger (CCCH type) motif-containing protein                   |
| TGME49_247760 | -3.35  | 6.83  | 1.52E-12 | 4.68E-11 | AMP-binding enzyme domain-containing protein                       |
| TGME49_232500 | -9.93  | 6.44  | 1.52E-12 | 4.68E-11 | hypothetical protein                                               |
| TGME49_250670 | 2.24   | 6.89  | 1.70E-12 | 5.19E-11 | hypothetical protein                                               |
| TGME49_221675 | 1.46   | 7.82  | 2.00E-12 | 6.07E-11 | hypothetical protein                                               |
| TGME49_214220 | 1.37   | 9.74  | 2.12E-12 | 6.41E-11 | hypothetical protein                                               |
| TGME49_253570 | 2.19   | 6.14  | 2.26E-12 | 6.82E-11 | hypothetical protein                                               |
| TGME49_257945 | 4.42   | 4.77  | 2.33E-12 | 7.01E-11 | 3'5'-cyclic nucleotide phosphodiesterase domain-containing protein |
| TGME49_282070 | -1.87  | 8.54  | 2.41E-12 | 7.22E-11 | hypothetical protein                                               |
| TGME49_253090 | 2.21   | 5.86  | 2.46E-12 | 7.34E-11 | DEAD/DEAH box helicase domain-containing protein                   |
| TGME49_263550 | 1.76   | 6.57  | 2.56E-12 | 7.60E-11 | 39S ribosomal protein L47, mitochondrial precursor, putative       |
| TGME49_219485 | 2.11   | 6.92  | 2.61E-12 | 7.73E-11 | hypothetical protein                                               |
| TGME49_240870 | -2.88  | 7.10  | 2.67E-12 | 7.88E-11 | beta adaptin protein, putative                                     |
| TGME49_220930 | -2.83  | 7.43  | 2.69E-12 | 7.90E-11 | hypothetical protein                                               |
| TGME49_320180 | 5.44   | 5.15  | 2.94E-12 | 8.60E-11 | SAG-related sequence SRS16C                                        |
| TGME49_229020 | -9.88  | 6.41  | 3.34E-12 | 9.73E-11 | cell-cycle-associated protein kinase CDK, putative                 |
| TGME49_214970 | -1.90  | 8.91  | 3.41E-12 | 9.87E-11 | DNA replication licensing factor, putative                         |
| TGME49_313660 | 3.66   | 4.89  | 3.47E-12 | 1.00E-10 | hypothetical protein                                               |
| TGME49_245460 | 1.16   | 10.31 | 3.50E-12 | 1.01E-10 | ribosomal protein RPS8                                             |
| TGME49_218880 | -2.54  | 7.48  | 3.62E-12 | 1.04E-10 | SF-assemblin, putative                                             |
| TGME49_310460 | -3.13  | 7.01  | 3.80E-12 | 1.09E-10 | Rab6                                                               |
| TGME49_213060 | 1.91   | 6.59  | 4.02E-12 | 1.14E-10 | WD domain, G-beta repeat-containing protein                        |
| TGME49_239540 | -9.89  | 6.42  | 4.75E-12 | 1.34E-10 | LEM3 (ligand-effect modulator 3) family / CDC50 family protein     |
| TGME49_213280 | 1.16   | 8.91  | 4.85E-12 | 1.36E-10 | SAG-related sequence SRS25                                         |
| TGME49_274190 | -4.96  | 6.59  | 4.87E-12 | 1.36E-10 | eukaryotic initiation factor 2B epsilon subunit, putative          |
| TGME49_315780 | -3.31  | 6.99  | 4.97E-12 | 1.38E-10 | myosin regulatory light chain, putative                            |
| TGME49_212860 | 1.90   | 6.72  | 5.17E-12 | 1.43E-10 | hypothetical protein                                               |
| TGME49_220950 | 1.57   | 9.89  | 5.31E-12 | 1.47E-10 | hypothetical protein                                               |
| TGME49_312622 | -2.72  | 7.05  | 5.65E-12 | 1.55E-10 | DUF803 domain-containing protein                                   |
| TGME49_295990 | 1.59   | 7.35  | 5.95E-12 | 1.63E-10 | ubiquitin conjugating enzyme E2, putative                          |
| TGME49_277940 | -4.03  | 6.79  | 6.06E-12 | 1.65E-10 | hypothetical protein                                               |
| TGME49_260180 | -2.13  | 7.68  | 6.49E-12 | 1.76E-10 | hypothetical protein                                               |
| TGME49_306440 | -9.84  | 6.04  | 6.83E-12 | 1.85E-10 | hypothetical protein                                               |
| TGME49_231430 | -9.84  | 6.39  | 7.22E-12 | 1.95E-10 | oligosaccharyl transferase stt3 protein, putative                  |
| TGME49_310130 | -9.82  | 6.05  | 7.42E-12 | 2.00E-10 | Spc97 / Spc98 family protein                                       |
| TGME49_217700 | -9.87  | 6.41  | 7.59E-12 | 2.03E-10 | AP2 domain transcription factor AP2XII-2                           |
| TGME49_266990 | -1.94  | 7.81  | 7.97E-12 | 2.13E-10 | beta-COP                                                           |
| TGME49_219700 | -1.94  | 8.41  | 8.34E-12 | 2.21E-10 | DNA replication licensing factor MCM4, putative                    |
| TGME49_226705 | -10.02 | 6.39  | 9.21E-12 | 2.43E-10 | hypothetical protein                                               |
| TGME49_211150 | -4.82  | 6.82  | 9.63E-12 | 2.53E-10 | hypothetical protein                                               |
| TGME49_301270 | 1.33   | 8.03  | 9.96E-12 | 2.61E-10 | Tyrosine kinase-like (TKL) protein                                 |
| TGME49_228660 | -3.53  | 6.95  | 1.01E-11 | 2.63E-10 | Sec7 domain-containing protein                                     |
| TGME49_296010 | -1.93  | 7.91  | 1.08E-11 | 2.81E-10 | phosphatidylinositol 3- and 4-kinase                               |
| TGME49_237210 | -4.79  | 6.72  | 1.10E-11 | 2.84E-10 | Tyrosine kinase-like (TKL) protein                                 |
| TGME49_270270 | -4.08  | 6.69  | 1.11E-11 | 2.88E-10 | hypothetical protein                                               |
| TGME49_220880 | 1.87   | 6.18  | 1.15E-11 | 2.96E-10 | hypothetical protein                                               |
| TGME49_214140 | 1.35   | 8.62  | 1.15E-11 | 2.96E-10 | hypothetical protein                                               |
| TGME49_314410 | -2.67  | 7.22  | 1.18E-11 | 3.02E-10 | aquarius, putative                                                 |
| TGME49_320130 | 2.02   | 5.97  | 1.25E-11 | 3.19E-10 | hypothetical protein                                               |
| TGME49_254220 | 2.22   | 5.45  | 1.35E-11 | 3.43E-10 | hypothetical protein                                               |
| TGME49_274060 | -2.10  | 7.69  | 1.42E-11 | 3.60E-10 | 2-oxoglutarate/malate translocase OMT                              |
| TGME49_321650 | -2.55  | 7.47  | 1.45E-11 | 3.66E-10 | hypothetical protein                                               |
| TGME49_218560 | -2.00  | 7.74  | 1.50E-11 | 3.76E-10 | acetyl-coA carboxylase ACC2                                        |
| TGME49_292160 | 1.97   | 6.10  | 1.53E-11 | 3.82E-10 | hypothetical protein                                               |

|               |        |       |          |          |                                                           |
|---------------|--------|-------|----------|----------|-----------------------------------------------------------|
| TGME49_255410 | -4.79  | 6.62  | 1.63E-11 | 4.06E-10 | hypothetical protein                                      |
| TGME49_263490 | 2.10   | 5.71  | 1.72E-11 | 4.27E-10 | ubiquitin conjugating enzyme E2, putative                 |
| TGME49_268230 | -10.16 | 6.51  | 1.72E-11 | 4.27E-10 | hypothetical protein                                      |
| TGME49_207640 | -2.13  | 7.49  | 1.73E-11 | 4.28E-10 | isoleucyl-tRNA synthetase family protein                  |
| TGME49_290700 | 1.76   | 7.93  | 1.80E-11 | 4.43E-10 | hypothetical protein                                      |
| TGME49_289710 | -2.53  | 7.42  | 1.95E-11 | 4.80E-10 | AP2 domain transcription factor AP2IX-5                   |
| TGME49_279100 | 1.23   | 9.39  | 2.04E-11 | 4.97E-10 | hypothetical protein                                      |
| TGME49_205680 | 2.15   | 8.42  | 2.24E-11 | 5.45E-10 | hypothetical protein                                      |
| TGME49_298620 | -4.77  | 6.83  | 2.35E-11 | 5.70E-10 | hypothetical protein                                      |
| TGME49_203600 | -1.53  | 9.21  | 2.38E-11 | 5.75E-10 | hypothetical protein                                      |
| TGME49_294640 | -1.55  | 8.84  | 2.46E-11 | 5.92E-10 | ribonucleoside-diphosphate reductase large chain          |
| TGME49_257490 | -3.98  | 6.62  | 2.51E-11 | 6.00E-10 | prefoldin subunit superfamily protein                     |
| TGME49_305090 | 2.15   | 6.45  | 2.64E-11 | 6.29E-10 | kinase binding protein cgi-121 protein                    |
| TGME49_257530 | -2.22  | 11.60 | 2.85E-11 | 6.73E-10 | transporter, major facilitator family protein             |
| TGME49_292130 | -1.31  | 9.66  | 2.89E-11 | 6.80E-10 | ribosomal protein RPL13A                                  |
| TGME49_288820 | 1.67   | 6.83  | 2.93E-11 | 6.88E-10 | hypothetical protein                                      |
| TGME49_245560 | 1.35   | 7.95  | 3.13E-11 | 7.31E-10 | hypothetical protein                                      |
| TGME49_230410 | -2.03  | 8.00  | 3.13E-11 | 7.31E-10 | peroxiredoxin PRX3                                        |
| TGME49_226310 | -3.47  | 7.74  | 3.38E-11 | 7.83E-10 | zinc finger (CCCH type) motif-containing protein          |
| TGME49_318310 | -2.07  | 7.63  | 3.61E-11 | 8.33E-10 | transketolase                                             |
| TGME49_318660 | 1.29   | 8.55  | 3.80E-11 | 8.75E-10 | PP2C, putative                                            |
| TGME49_273050 | 1.84   | 6.54  | 3.90E-11 | 8.96E-10 | hypothetical protein                                      |
| TGME49_320588 | -9.75  | 6.31  | 4.05E-11 | 9.27E-10 | glycosyl hydrolases family 35 protein                     |
| TGME49_294990 | -9.75  | 6.22  | 4.42E-11 | 1.01E-09 | hypothetical protein                                      |
| TGME49_306330 | -2.75  | 6.75  | 4.47E-11 | 1.02E-09 | phospholipase                                             |
| TGME49_257350 | 1.50   | 8.60  | 4.52E-11 | 1.03E-09 | eukaryotic translation initiation factor, putative        |
| TGME49_232280 | -9.89  | 6.42  | 4.64E-11 | 1.05E-09 | hypothetical protein                                      |
| TGME49_207690 | -4.73  | 6.36  | 4.69E-11 | 1.06E-09 | programmed cell death 5 protein                           |
| TGME49_217951 | 8.04   | 5.22  | 4.79E-11 | 1.07E-09 | hypothetical protein                                      |
| TGME49_228190 | -1.90  | 7.95  | 4.79E-11 | 1.07E-09 | eukaryotic initiation factor-3, subunit 5, putative       |
| TGME49_250710 | 1.13   | 11.27 | 4.86E-11 | 1.09E-09 | microneme protein MIC10                                   |
| TGME49_308810 | -1.91  | 8.08  | 4.99E-11 | 1.11E-09 | rhopty neck protein RON9                                  |
| TGME49_249610 | -2.92  | 6.80  | 5.31E-11 | 1.18E-09 | hypothetical protein                                      |
| TGME49_290170 | -2.51  | 7.34  | 5.48E-11 | 1.21E-09 | kelch repeat domain containing/Serine/threonine protein   |
| TGME49_272410 | 1.63   | 6.75  | 6.64E-11 | 1.47E-09 | phosphogluconate dehydrogenase (decarboxylating), NA      |
| TGME49_215590 | -2.03  | 8.31  | 7.01E-11 | 1.54E-09 | flavoprotein subunit of succinate dehydrogenase           |
| TGME49_297880 | -2.17  | 10.28 | 7.27E-11 | 1.60E-09 | dense granule protein DG32                                |
| TGME49_297530 | -9.68  | 6.26  | 7.67E-11 | 1.68E-09 | DNA-directed RNA polymerase I RPA2                        |
| TGME49_251800 | 2.19   | 5.67  | 7.70E-11 | 1.68E-09 | hypothetical protein                                      |
| TGME49_313445 | 2.08   | 5.72  | 7.85E-11 | 1.71E-09 | hypothetical protein                                      |
| TGME49_286470 | 1.18   | 8.36  | 7.89E-11 | 1.71E-09 | AGC kinase                                                |
| TGME49_239800 | -3.12  | 6.90  | 8.56E-11 | 1.85E-09 | hypothetical protein                                      |
| TGME49_249230 | -4.83  | 6.14  | 9.03E-11 | 1.95E-09 | hypothetical protein                                      |
| TGME49_264830 | -4.67  | 6.49  | 9.12E-11 | 1.96E-09 | hypothetical protein                                      |
| TGME49_221830 | 3.34   | 5.06  | 9.30E-11 | 1.99E-09 | subtilisin SUB12                                          |
| TGME49_291940 | -4.65  | 6.39  | 9.84E-11 | 2.10E-09 | hypothetical protein                                      |
| TGME49_226810 | -3.47  | 6.80  | 1.02E-10 | 2.17E-09 | histone lysine methyltransferase SET1                     |
| TGME49_321690 | -3.95  | 6.68  | 1.05E-10 | 2.23E-09 | hypothetical protein                                      |
| TGME49_305860 | -2.36  | 7.93  | 1.08E-10 | 2.28E-09 | calcium-dependent protein kinase CDPK3                    |
| TGME49_217890 | -1.40  | 8.67  | 1.11E-10 | 2.34E-09 | alkyl hydroperoxide reductase/ Thiol specific antioxidant |
| TGME49_294400 | -2.42  | 7.26  | 1.12E-10 | 2.36E-09 | hypothetical protein                                      |
| TGME49_237015 | 1.50   | 7.91  | 1.24E-10 | 2.59E-09 | hypothetical protein                                      |
| TGME49_232270 | -9.76  | 5.79  | 1.29E-10 | 2.69E-09 | histidine acid phosphatase superfamily protein            |
| TGME49_205360 | -2.57  | 7.08  | 1.44E-10 | 3.00E-09 | hypothetical protein                                      |
| TGME49_225250 | 1.93   | 5.93  | 1.48E-10 | 3.08E-09 | LSU ribosomal protein L14P, putative                      |
| TGME49_226220 | -2.89  | 6.89  | 1.52E-10 | 3.14E-09 | alveolin domain containing intermediate filament IMC9     |
| TGME49_226500 | -4.82  | 6.63  | 1.58E-10 | 3.26E-09 | hypothetical protein                                      |

|               |       |       |          |          |                                                     |
|---------------|-------|-------|----------|----------|-----------------------------------------------------|
| TGME49_223760 | -9.63 | 6.03  | 1.61E-10 | 3.32E-09 | hypothetical protein                                |
| TGME49_206695 | 2.63  | 5.29  | 1.72E-10 | 3.53E-09 | hypothetical protein                                |
| TGME49_216970 | -1.81 | 7.94  | 1.73E-10 | 3.54E-09 | coronin, putative                                   |
| TGME49_209060 | -3.82 | 6.66  | 1.76E-10 | 3.60E-09 | thrombospondin type 1 domain-containing protein     |
| TGME49_294690 | 1.64  | 7.53  | 1.77E-10 | 3.60E-09 | rhomboid protease ROM5                              |
| TGME49_261970 | 1.71  | 7.59  | 1.89E-10 | 3.83E-09 | hypothetical protein                                |
| TGME49_309110 | 1.83  | 6.61  | 2.03E-10 | 4.10E-09 | tRNA methyl transferase                             |
| TGME49_268225 | -5.03 | 6.81  | 2.09E-10 | 4.19E-09 | hypothetical protein                                |
| TGME49_313230 | 2.07  | 9.82  | 2.19E-10 | 4.38E-09 | eukaryotic initiation factor-2, alpha subunit       |
| TGME49_216730 | -1.60 | 8.59  | 2.22E-10 | 4.43E-09 | MCM2/3/5 family protein                             |
| TGME49_292140 | 1.46  | 7.59  | 2.27E-10 | 4.51E-09 | NIMA-related protein kinase NIMA1                   |
| TGME49_319910 | 1.90  | 5.94  | 2.39E-10 | 4.73E-09 | WD domain, G-beta repeat-containing protein         |
| TGME49_217520 | 1.16  | 8.89  | 2.57E-10 | 5.06E-09 | hypothetical protein                                |
| TGME49_216020 | -9.61 | 6.06  | 2.57E-10 | 5.06E-09 | peptidase family c78 protein                        |
| TGME49_293660 | -3.81 | 6.63  | 2.59E-10 | 5.07E-09 | hypothetical protein                                |
| TGME49_301180 | 3.30  | 5.49  | 2.92E-10 | 5.71E-09 | SAG-related sequence SRS19F                         |
| TGME49_318690 | 2.72  | 5.00  | 2.96E-10 | 5.77E-09 | RNA recognition motif-containing protein            |
| TGME49_262380 | -3.11 | 7.00  | 3.07E-10 | 5.97E-09 | elongation factor Tu, putative                      |
| TGME49_315530 | -4.61 | 6.48  | 3.46E-10 | 6.71E-09 | hypothetical protein                                |
| TGME49_227910 | -1.72 | 7.80  | 3.54E-10 | 6.86E-09 | hypothetical protein                                |
| TGME49_204310 | -1.56 | 8.50  | 3.62E-10 | 6.99E-09 | hypothetical protein                                |
| TGME49_261620 | 1.94  | 5.83  | 3.84E-10 | 7.40E-09 | hypothetical protein                                |
| TGME49_222940 | 4.65  | 5.07  | 3.92E-10 | 7.53E-09 | hypothetical protein                                |
| TGME49_260800 | 1.69  | 6.32  | 3.94E-10 | 7.55E-09 | hypothetical protein                                |
| TGME49_249650 | -9.59 | 5.91  | 4.02E-10 | 7.68E-09 | apolipoprotein A-I binding protein, putative        |
| TGME49_254520 | 1.24  | 7.43  | 4.06E-10 | 7.74E-09 | mediator complex subunit MED11                      |
| TGME49_246930 | -2.33 | 7.26  | 4.24E-10 | 8.06E-09 | calmodulin CAM1                                     |
| TGME49_211250 | -3.09 | 6.81  | 4.35E-10 | 8.25E-09 | hypothetical protein                                |
| TGME49_264600 | -2.67 | 6.95  | 4.38E-10 | 8.29E-09 | hypothetical protein                                |
| TGME49_263540 | 2.39  | 5.09  | 4.50E-10 | 8.49E-09 | hypothetical protein                                |
| TGME49_250330 | -9.57 | 6.25  | 4.59E-10 | 8.64E-09 | hypothetical protein                                |
| TGME49_236570 | -1.58 | 7.93  | 5.20E-10 | 9.74E-09 | lysine decarboxylase family protein                 |
| TGME49_205580 | 1.37  | 7.01  | 5.31E-10 | 9.92E-09 | nuclear factor NF4                                  |
| TGME49_229420 | -9.54 | 6.04  | 5.34E-10 | 9.95E-09 | cytochrome c, putative                              |
| TGME49_271460 | 2.34  | 6.76  | 5.54E-10 | 1.03E-08 | protein c14orf29, putative                          |
| TGME49_251540 | 1.30  | 9.03  | 5.82E-10 | 1.07E-08 | dense granule protein GRA9                          |
| TGME49_299250 | 2.79  | 6.36  | 5.93E-10 | 1.09E-08 | hypothetical protein                                |
| TGME49_277720 | -2.27 | 7.54  | 5.98E-10 | 1.10E-08 | GDA1/CD39 (nucleoside phosphatase) family protein   |
| TGME49_249990 | 1.69  | 10.24 | 6.22E-10 | 1.14E-08 | hypothetical protein                                |
| TGME49_290970 | 2.51  | 7.23  | 6.37E-10 | 1.16E-08 | 8-amino-7-oxononanoate synthase                     |
| TGME49_260670 | -9.55 | 5.92  | 6.50E-10 | 1.18E-08 | centrin, putative                                   |
| TGME49_289750 | -1.30 | 9.50  | 7.01E-10 | 1.27E-08 | ribosomal-ubiquitin protein RPL40                   |
| TGME49_280400 | -9.61 | 7.58  | 7.55E-10 | 1.37E-08 | hypothetical protein                                |
| TGME49_209730 | -9.53 | 5.93  | 7.64E-10 | 1.38E-08 | hypothetical protein                                |
| TGME49_294610 | -1.38 | 9.34  | 8.05E-10 | 1.45E-08 | histone lysine methyltransferase, SET, putative     |
| TGME49_237560 | -1.20 | 9.13  | 8.33E-10 | 1.50E-08 | iron-sulfur cluster protein ISCU                    |
| TGME49_272730 | 3.75  | 4.78  | 8.62E-10 | 1.54E-08 | hypothetical protein                                |
| TGME49_202310 | 1.71  | 6.20  | 8.85E-10 | 1.58E-08 | O-sialoglycoprotein endopeptidase                   |
| TGME49_202920 | -9.53 | 6.07  | 9.01E-10 | 1.60E-08 | p-aminobenzoic acid synthase                        |
| TGME49_313380 | -1.25 | 9.56  | 9.12E-10 | 1.62E-08 | hypothetical protein                                |
| TGME49_251500 | -1.61 | 8.09  | 9.42E-10 | 1.67E-08 | eukaryotic initiation factor-3, subunit 3, putative |
| TGME49_270620 | 2.90  | 6.19  | 9.48E-10 | 1.67E-08 | DEAD/DEAH box helicase domain-containing protein    |
| TGME49_313880 | -9.55 | 5.91  | 9.56E-10 | 1.68E-08 | nuclear protein-like family protein                 |
| TGME49_278050 | -2.22 | 7.70  | 1.04E-09 | 1.82E-08 | proteasome subunit alpha type 1, putative           |
| TGME49_238895 | -2.84 | 7.20  | 1.04E-09 | 1.82E-08 | hypothetical protein                                |
| TGME49_260440 | 1.21  | 9.39  | 1.07E-09 | 1.87E-08 | nuclear factor NF3                                  |
| TGME49_211040 | -1.61 | 8.12  | 1.12E-09 | 1.95E-08 | Sec61beta family protein                            |

|               |       |       |          |          |                                                        |
|---------------|-------|-------|----------|----------|--------------------------------------------------------|
| TGME49_254000 | 1.37  | 7.06  | 1.12E-09 | 1.95E-08 | hypothetical protein                                   |
| TGME49_255700 | -2.42 | 7.07  | 1.13E-09 | 1.96E-08 | hypothetical protein                                   |
| TGME49_257050 | -9.48 | 5.79  | 1.16E-09 | 2.01E-08 | 3-methyl-2-oxobutanoate hydroxymethyltransferase       |
| TGME49_320640 | -9.58 | 6.10  | 1.17E-09 | 2.03E-08 | peptidylprolyl isomerase domain-containing protein     |
| TGME49_288400 | -9.50 | 6.03  | 1.19E-09 | 2.06E-08 | LETM1 family protein                                   |
| TGME49_253850 | 2.47  | 5.06  | 1.21E-09 | 2.08E-08 | hypothetical protein                                   |
| TGME49_236250 | 2.02  | 5.67  | 1.22E-09 | 2.09E-08 | regulator of chromosome condensation (RCC1) repeat-c   |
| TGME49_239590 | -4.54 | 6.37  | 1.25E-09 | 2.13E-08 | WD domain, G-beta repeat-containing protein            |
| TGME49_250840 | -9.48 | 6.18  | 1.26E-09 | 2.15E-08 | hypothetical protein                                   |
| TGME49_261480 | 1.76  | 6.87  | 1.33E-09 | 2.26E-08 | phosphatidyl serine synthase                           |
| TGME49_290720 | -1.87 | 7.52  | 1.39E-09 | 2.35E-08 | vacuolar proton translocating ATPase subunit, putative |
| TGME49_306390 | -1.62 | 7.63  | 1.50E-09 | 2.53E-08 | hypothetical protein                                   |
| TGME49_286790 | -4.49 | 6.16  | 1.53E-09 | 2.57E-08 | nuclear factor NF2                                     |
| TGME49_270930 | -3.08 | 6.90  | 1.57E-09 | 2.63E-08 | hypothetical protein                                   |
| TGME49_201800 | -1.91 | 7.11  | 1.57E-09 | 2.63E-08 | hypothetical protein                                   |
| TGME49_309870 | -9.48 | 5.78  | 1.58E-09 | 2.63E-08 | hypothetical protein                                   |
| TGME49_308060 | -3.13 | 6.56  | 1.60E-09 | 2.67E-08 | hypothetical protein                                   |
| TGME49_249530 | -1.77 | 7.70  | 1.63E-09 | 2.71E-08 | exportin 1, putative                                   |
| TGME49_285140 | -9.49 | 6.26  | 1.65E-09 | 2.73E-08 | hypothetical protein                                   |
| TGME49_255940 | 2.44  | 5.25  | 1.66E-09 | 2.75E-08 | hypothetical protein                                   |
| TGME49_262930 | -9.47 | 5.80  | 1.68E-09 | 2.78E-08 | hypothetical protein                                   |
| TGME49_255180 | -9.46 | 6.36  | 1.72E-09 | 2.83E-08 | ubiquitin carboxyl-terminal hydrolase                  |
| TGME49_243250 | -1.70 | 7.91  | 1.89E-09 | 3.10E-08 | myosin H                                               |
| TGME49_213410 | -1.97 | 7.73  | 1.89E-09 | 3.10E-08 | small nuclear ribonucleoprotein f (snrnp-f), putative  |
| TGME49_231980 | -9.49 | 5.84  | 2.00E-09 | 3.27E-08 | hypothetical protein                                   |
| TGME49_320490 | 2.04  | 8.78  | 2.03E-09 | 3.30E-08 | N-acyl-phosphatidylethanolamine-hydrolyzing phosphol   |
| TGME49_309220 | -1.98 | 7.36  | 2.15E-09 | 3.49E-08 | GTPase activating protein for Arf protein              |
| TGME49_307830 | -1.52 | 8.45  | 2.22E-09 | 3.59E-08 | hypothetical protein                                   |
| TGME49_213050 | 2.16  | 8.44  | 2.26E-09 | 3.65E-08 | hypothetical protein                                   |
| TGME49_256840 | -4.47 | 5.96  | 2.27E-09 | 3.67E-08 | hypothetical protein                                   |
| TGME49_262150 | -9.42 | 5.98  | 2.33E-09 | 3.73E-08 | kelch repeat and K+ channel tetramerisation domain cor |
| TGME49_224880 | -3.34 | 7.04  | 2.38E-09 | 3.81E-08 | kinesin motor domain-containing protein                |
| TGME49_270770 | -4.53 | 6.36  | 2.40E-09 | 3.84E-08 | PWI domain-containing protein                          |
| TGME49_232640 | 2.93  | 5.04  | 2.43E-09 | 3.87E-08 | RNA 2'-phosphotransferase, Tpt1/KptA family protein    |
| TGME49_224960 | 1.40  | 7.07  | 2.44E-09 | 3.88E-08 | hypothetical protein                                   |
| TGME49_289300 | -2.10 | 7.33  | 2.49E-09 | 3.95E-08 | methionyl-tRNA synthetase                              |
| TGME49_237830 | -9.48 | 5.84  | 2.50E-09 | 3.95E-08 | DNA polymerase I domain-containing protein             |
| TGME49_285260 | 2.87  | 4.95  | 2.96E-09 | 4.65E-08 | hypothetical protein                                   |
| TGME49_262040 | -2.75 | 6.75  | 2.96E-09 | 4.65E-08 | SAC3/GANP family protein                               |
| TGME49_310220 | -4.55 | 6.48  | 3.01E-09 | 4.72E-08 | hypothetical protein                                   |
| TGME49_278815 | -3.71 | 6.59  | 3.06E-09 | 4.79E-08 | hypothetical protein                                   |
| TGME49_319370 | -9.43 | 6.12  | 3.11E-09 | 4.85E-08 | hypothetical protein                                   |
| TGME49_219270 | -1.21 | 10.13 | 3.12E-09 | 4.86E-08 | multi-pass transmembrane protein                       |
| TGME49_249590 | -1.85 | 7.72  | 3.16E-09 | 4.91E-08 | proteasome subunit alpha type 5-2, putative            |
| TGME49_247360 | 2.19  | 7.48  | 3.25E-09 | 5.03E-08 | PAP2 superfamily protein                               |
| TGME49_309380 | -3.21 | 6.60  | 3.28E-09 | 5.07E-08 | Nuf2                                                   |
| TGME49_300130 | 3.11  | 4.71  | 3.30E-09 | 5.09E-08 | apical membrane antigen 1 domain-containing protein    |
| TGME49_305240 | -3.24 | 6.60  | 3.33E-09 | 5.12E-08 | XPA binding protein 2 family protein                   |
| TGME49_312960 | 1.67  | 6.29  | 3.40E-09 | 5.22E-08 | hypothetical protein                                   |
| TGME49_209755 | 6.35  | 6.70  | 3.62E-09 | 5.55E-08 | hypothetical protein                                   |
| TGME49_213325 | -9.45 | 5.93  | 3.64E-09 | 5.56E-08 | TBC domain-containing protein                          |
| TGME49_266380 | -9.53 | 5.23  | 3.72E-09 | 5.67E-08 | hypothetical protein                                   |
| TGME49_225290 | 3.12  | 6.40  | 3.88E-09 | 5.90E-08 | GDA1/CD39 (nucleoside phosphatase) family protein      |
| TGME49_237550 | 2.49  | 6.56  | 3.89E-09 | 5.90E-08 | hypothetical protein                                   |
| TGME49_310030 | -1.89 | 7.62  | 3.95E-09 | 5.99E-08 | cyclase-associated protein, putative                   |
| TGME49_219860 | -1.53 | 8.73  | 3.98E-09 | 6.01E-08 | replication licensing factor, putative                 |
| TGME49_240860 | -3.67 | 6.54  | 3.99E-09 | 6.01E-08 | acyltransferase domain-containing protein              |

|               |       |       |          |          |                                                           |
|---------------|-------|-------|----------|----------|-----------------------------------------------------------|
| TGME49_234980 | 1.94  | 6.57  | 4.00E-09 | 6.03E-08 | hypothetical protein                                      |
| TGME49_201400 | -4.47 | 6.24  | 4.03E-09 | 6.05E-08 | Sin3-associated polypeptide SAP18                         |
| TGME49_290900 | -9.44 | 5.86  | 4.12E-09 | 6.19E-08 | hydrolase, NUDIX family protein                           |
| TGME49_251840 | 1.67  | 6.35  | 4.20E-09 | 6.29E-08 | hypothetical protein                                      |
| TGME49_310930 | -3.22 | 6.48  | 4.23E-09 | 6.32E-08 | hypothetical protein                                      |
| TGME49_308950 | 1.10  | 8.60  | 4.25E-09 | 6.33E-08 | histidine acid phosphatase superfamily protein            |
| TGME49_318330 | -9.40 | 5.85  | 4.28E-09 | 6.37E-08 | histone lysine acetyltransferase MYST-A                   |
| TGME49_224460 | -2.12 | 11.30 | 4.55E-09 | 6.75E-08 | aminopeptidase n, putative                                |
| TGME49_297810 | -1.71 | 7.88  | 4.78E-09 | 7.08E-08 | hypothetical protein                                      |
| TGME49_313440 | 4.64  | 8.07  | 5.04E-09 | 7.45E-08 | hypothetical protein                                      |
| TGME49_213010 | -4.64 | 7.34  | 5.15E-09 | 7.60E-08 | hypothetical protein                                      |
| TGME49_290160 | -1.68 | 8.18  | 5.44E-09 | 8.02E-08 | sortilin, putative                                        |
| TGME49_254840 | -3.32 | 5.67  | 5.49E-09 | 8.07E-08 | tetratricopeptide repeat-containing protein               |
| TGME49_282150 | -9.37 | 5.86  | 5.53E-09 | 8.11E-08 | hypothetical protein                                      |
| TGME49_271760 | -9.37 | 5.72  | 5.62E-09 | 8.22E-08 | seryl-tRNA synthetase (SerRS2)                            |
| TGME49_229470 | -4.47 | 6.35  | 5.70E-09 | 8.33E-08 | hypothetical protein                                      |
| TGME49_205040 | -1.73 | 7.70  | 5.72E-09 | 8.35E-08 | PGAP1 family protein                                      |
| TGME49_253470 | 1.58  | 7.35  | 5.75E-09 | 8.37E-08 | alveolin domain containing intermediate filament IMC13    |
| TGME49_319580 | -9.35 | 5.99  | 6.23E-09 | 9.05E-08 | hypothetical protein                                      |
| TGME49_208590 | -2.13 | 7.00  | 6.32E-09 | 9.17E-08 | vacuolar ATP synthase subunit 54kD, putative              |
| TGME49_250100 | 3.11  | 6.89  | 6.48E-09 | 9.35E-08 | hypothetical protein                                      |
| TGME49_231120 | 1.68  | 6.29  | 6.49E-09 | 9.35E-08 | ribosomal protein S11, putative                           |
| TGME49_276970 | -3.19 | 6.73  | 6.87E-09 | 9.86E-08 | hypothetical protein                                      |
| TGME49_249470 | -9.34 | 5.77  | 6.87E-09 | 9.86E-08 | rhoptry kinase family protein, truncated (incomplete cat  |
| TGME49_209130 | -9.35 | 5.70  | 7.08E-09 | 1.01E-07 | regulator of chromosome condensation (RCC1) repeat-c      |
| TGME49_265500 | -9.34 | 6.01  | 7.16E-09 | 1.02E-07 | chloride transporter, chloride channel (ClC) family prote |
| TGME49_252640 | 5.57  | 4.69  | 7.29E-09 | 1.04E-07 | P-type ATPase PMA1                                        |
| TGME49_289580 | -9.34 | 6.04  | 7.29E-09 | 1.04E-07 | strictosidine synthase subfamily protein                  |
| TGME49_200300 | 3.36  | 4.83  | 7.36E-09 | 1.05E-07 | hypothetical protein                                      |
| TGME49_218192 | -9.70 | 5.36  | 7.44E-09 | 1.06E-07 | hypothetical protein                                      |
| TGME49_329800 | -2.18 | 6.84  | 7.61E-09 | 1.08E-07 | hypothetical protein                                      |
| TGME49_222960 | -9.37 | 5.95  | 7.61E-09 | 1.08E-07 | SCY kinase-related protein (incomplete catalytic triad)   |
| TGME49_277910 | 1.46  | 6.76  | 7.78E-09 | 1.10E-07 | thrombospondin type 1 domain-containing protein           |
| TGME49_273905 | -4.37 | 6.09  | 8.09E-09 | 1.14E-07 | hypothetical protein                                      |
| TGME49_259530 | -4.38 | 5.96  | 8.08E-09 | 1.14E-07 | GalNac                                                    |
| TGME49_219070 | 1.38  | 7.52  | 8.53E-09 | 1.20E-07 | cyclic nucleotide-binding domain-containing protein       |
| TGME49_297745 | -4.07 | 6.99  | 8.84E-09 | 1.24E-07 | hypothetical protein                                      |
| TGME49_289730 | -2.27 | 7.06  | 8.90E-09 | 1.24E-07 | Pep3/Vps18/deep orange family protein                     |
| TGME49_220100 | -2.84 | 6.73  | 9.22E-09 | 1.29E-07 | phosphoribosylpyrophosphate synthetase                    |
| TGME49_310140 | -9.32 | 5.76  | 9.75E-09 | 1.35E-07 | hypothetical protein                                      |
| TGME49_288340 | -9.30 | 5.69  | 1.03E-08 | 1.43E-07 | UBX domain-containing protein                             |
| TGME49_203560 | -9.40 | 5.94  | 1.06E-08 | 1.46E-07 | hypothetical protein                                      |
| TGME49_234190 | -1.51 | 8.32  | 1.07E-08 | 1.47E-07 | serine hydroxymethyltransferase 2, putative               |
| TGME49_269970 | 1.32  | 6.91  | 1.08E-08 | 1.48E-07 | hypothetical protein                                      |
| TGME49_280390 | -2.68 | 6.88  | 1.19E-08 | 1.64E-07 | HEAT repeat-containing protein                            |
| TGME49_223855 | 2.84  | 6.35  | 1.21E-08 | 1.66E-07 | RNA recognition motif-containing protein                  |
| TGME49_227952 | -2.49 | 6.97  | 1.23E-08 | 1.69E-07 | 14-3-3 superfamily protein                                |
| TGME49_248530 | -9.31 | 5.80  | 1.25E-08 | 1.70E-07 | FATC domain-containing protein                            |
| TGME49_306930 | -1.60 | 7.80  | 1.25E-08 | 1.71E-07 | proteasome subunit beta type 7 precursor, putative        |
| TGME49_254370 | -1.54 | 8.18  | 1.27E-08 | 1.73E-07 | guanylyl cyclase                                          |
| TGME49_320630 | -1.44 | 7.78  | 1.29E-08 | 1.76E-07 | phosphotransferase enzyme family protein                  |
| TGME49_287040 | 1.45  | 7.04  | 1.30E-08 | 1.76E-07 | hypothetical protein                                      |
| TGME49_267340 | 2.16  | 5.19  | 1.39E-08 | 1.88E-07 | hypothetical protein                                      |
| TGME49_290890 | -2.85 | 6.43  | 1.39E-08 | 1.88E-07 | carbonyl reductase 1, putative                            |
| TGME49_262630 | 3.44  | 5.14  | 1.41E-08 | 1.90E-07 | hypothetical protein                                      |
| TGME49_239260 | 3.08  | 4.79  | 1.43E-08 | 1.92E-07 | histone H4                                                |
| TGME49_280490 | -2.50 | 7.89  | 1.47E-08 | 1.97E-07 | U-box domain-containing protein                           |

|               |       |       |          |          |                                                         |
|---------------|-------|-------|----------|----------|---------------------------------------------------------|
| TGME49_267500 | 1.02  | 8.83  | 1.50E-08 | 2.01E-07 | hypothetical protein                                    |
| TGME49_265110 | -9.30 | 6.03  | 1.54E-08 | 2.05E-07 | ribosome biogenesis protein, putative                   |
| TGME49_226420 | -1.98 | 6.96  | 1.57E-08 | 2.10E-07 | peptidase family M3 protein                             |
| TGME49_310360 | -1.82 | 7.41  | 1.59E-08 | 2.12E-07 | hypothetical protein                                    |
| TGME49_219730 | 1.33  | 7.57  | 1.61E-08 | 2.15E-07 | hypothetical protein                                    |
| TGME49_209960 | -2.20 | 6.95  | 1.63E-08 | 2.17E-07 | glycosyltransferase                                     |
| TGME49_219080 | -9.29 | 5.98  | 1.64E-08 | 2.18E-07 | edge expressed protein, putative                        |
| TGME49_217400 | -2.97 | 6.55  | 1.67E-08 | 2.21E-07 | hypothetical protein                                    |
| TGME49_266410 | 1.53  | 6.23  | 1.69E-08 | 2.22E-07 | hypothetical protein                                    |
| TGME49_278940 | 1.40  | 6.96  | 1.71E-08 | 2.25E-07 | HECT-domain (ubiquitin-transferase) domain-containing   |
| TGME49_319640 | 1.26  | 8.46  | 1.73E-08 | 2.26E-07 | hypothetical protein                                    |
| TGME49_257750 | -2.12 | 8.17  | 1.74E-08 | 2.28E-07 | homocysteine s-methyltransferase domain-containing p    |
| TGME49_227450 | 1.27  | 7.22  | 1.75E-08 | 2.29E-07 | hydrolase, NUDIX family protein                         |
| TGME49_318770 | -4.35 | 6.44  | 1.76E-08 | 2.30E-07 | aurora kinase(incomplete catalytic triad)               |
| TGME49_225060 | -2.83 | 6.46  | 1.78E-08 | 2.31E-07 | nucleoredoxin family protein                            |
| TGME49_293730 | -2.04 | 7.07  | 1.88E-08 | 2.44E-07 | DHHC zinc finger domain-containing protein              |
| TGME49_235020 | -1.75 | 7.85  | 1.89E-08 | 2.45E-07 | COPI protein, putative                                  |
| TGME49_206610 | -3.18 | 6.76  | 1.91E-08 | 2.47E-07 | pyruvate dehydrogenase complex subunit PDH-E2           |
| TGME49_225580 | -9.25 | 5.94  | 1.91E-08 | 2.48E-07 | proteasome (prosome, macropain) 26S subunit, non-ATP    |
| TGME49_312110 | -2.32 | 7.05  | 1.94E-08 | 2.50E-07 | apicoplast-associated thioredoxin family protein Atrx1  |
| TGME49_269450 | 2.15  | 5.12  | 1.95E-08 | 2.51E-07 | hypothetical protein                                    |
| TGME49_226910 | -4.34 | 6.44  | 2.04E-08 | 2.62E-07 | Amylo-alpha-1,6-glucosidase                             |
| TGME49_263630 | 1.13  | 7.63  | 2.06E-08 | 2.64E-07 | hypothetical protein                                    |
| TGME49_216510 | -4.30 | 5.85  | 2.12E-08 | 2.71E-07 | thioredoxin, putative                                   |
| TGME49_243430 | 1.86  | 7.87  | 2.13E-08 | 2.71E-07 | OTU family cysteine protease                            |
| TGME49_269920 | -1.47 | 8.62  | 2.14E-08 | 2.72E-07 | phosphatidylserine decarboxylase                        |
| TGME49_232710 | -1.01 | 10.10 | 2.14E-08 | 2.73E-07 | ribosomal protein RPS3A                                 |
| TGME49_312190 | -2.11 | 6.85  | 2.16E-08 | 2.74E-07 | hypothetical protein                                    |
| TGME49_239340 | -9.25 | 5.64  | 2.16E-08 | 2.74E-07 | hypothetical protein                                    |
| TGME49_222400 | 1.08  | 7.58  | 2.17E-08 | 2.75E-07 | hypothetical protein                                    |
| TGME49_222710 | -2.64 | 6.78  | 2.18E-08 | 2.75E-07 | IMP-specific 5'-nucleotidase 1, putative                |
| TGME49_247530 | 2.40  | 8.95  | 2.20E-08 | 2.78E-07 | hypothetical protein                                    |
| TGME49_233140 | -2.48 | 7.17  | 2.25E-08 | 2.82E-07 | deoxyuridine 5'-triphosphate nucleotidohydrolase, putat |
| TGME49_203730 | -9.23 | 5.89  | 2.38E-08 | 2.99E-07 | hypothetical protein                                    |
| TGME49_205510 | -1.74 | 7.70  | 2.47E-08 | 3.09E-07 | nucleolar protein 5, putative                           |
| TGME49_231130 | -9.23 | 5.70  | 2.49E-08 | 3.11E-07 | hypothetical protein                                    |
| TGME49_310450 | -2.34 | 7.13  | 2.74E-08 | 3.41E-07 | myosin heavy chain, putative                            |
| TGME49_261750 | -2.65 | 6.81  | 2.87E-08 | 3.58E-07 | rhoptry neck protein RON10                              |
| TGME49_265390 | -9.23 | 6.16  | 2.89E-08 | 3.59E-07 | hypothetical protein                                    |
| TGME49_239780 | -3.58 | 6.36  | 2.99E-08 | 3.70E-07 | hypothetical protein                                    |
| TGME49_211470 | 2.32  | 5.17  | 3.03E-08 | 3.74E-07 | Fcf2 pre-rRNA processing protein                        |
| TGME49_322000 | -2.58 | 7.25  | 3.20E-08 | 3.96E-07 | myosin-light-chain kinase                               |
| TGME49_206690 | -2.30 | 7.05  | 3.25E-08 | 4.00E-07 | glideosome-associated protein with multiple-membrane    |
| TGME49_227930 | 1.31  | 7.02  | 3.29E-08 | 4.04E-07 | hypothetical protein                                    |
| TGME49_240800 | -2.22 | 6.86  | 3.33E-08 | 4.09E-07 | MORN repeat-containing protein                          |
| TGME49_203760 | 1.68  | 6.32  | 3.53E-08 | 4.32E-07 | hypothetical protein                                    |
| TGME49_227420 | -9.24 | 5.89  | 3.59E-08 | 4.38E-07 | 4-hydroxy-3-methylbut-2-enyl diphosphate reductase      |
| TGME49_298830 | 1.81  | 6.26  | 3.64E-08 | 4.44E-07 | hypothetical protein                                    |
| TGME49_217688 | -9.21 | 5.67  | 3.68E-08 | 4.46E-07 | hypothetical protein                                    |
| TGME49_207160 | 4.41  | 5.87  | 3.74E-08 | 4.53E-07 | SAG-related sequence SRS49D                             |
| TGME49_280800 | -1.91 | 7.39  | 3.75E-08 | 4.54E-07 | SWI2/SNF2 SRCAP/Ino80                                   |
| TGME49_294940 | 1.46  | 6.95  | 3.80E-08 | 4.59E-07 | hypothetical protein                                    |
| TGME49_228750 | -3.53 | 6.46  | 3.97E-08 | 4.78E-07 | TGME49_228750 CAM kinase, RAD family                    |
| TGME49_306960 | -2.56 | 6.60  | 4.06E-08 | 4.90E-07 | phenylalanine--tRNA ligase, beta subunit protein        |
| TGME49_306600 | -9.22 | 5.73  | 4.16E-08 | 5.00E-07 | RNA recognition motif-containing protein                |
| TGME49_267620 | -2.90 | 6.97  | 4.17E-08 | 5.00E-07 | multi-pass transmembrane protein                        |
| TGME49_323320 | -3.55 | 5.30  | 4.22E-08 | 5.06E-07 | hypothetical protein                                    |

|               |       |      |          |          |                                                                        |
|---------------|-------|------|----------|----------|------------------------------------------------------------------------|
| TGME49_237000 | -4.26 | 5.99 | 4.23E-08 | 5.07E-07 | polyphosphoinositide binding protein, putative                         |
| TGME49_269290 | -3.04 | 6.26 | 4.37E-08 | 5.22E-07 | hypothetical protein                                                   |
| TGME49_251170 | 2.43  | 6.41 | 4.38E-08 | 5.23E-07 | KRUF family protein                                                    |
| TGME49_315750 | -1.69 | 7.00 | 4.43E-08 | 5.28E-07 | hypothetical protein                                                   |
| TGME49_271270 | -1.79 | 7.33 | 4.56E-08 | 5.43E-07 | hypothetical protein                                                   |
| TGME49_212170 | -9.18 | 5.94 | 4.64E-08 | 5.51E-07 | GIY-YIG catalytic domain-containing protein                            |
| TGME49_259020 | 6.07  | 5.55 | 4.68E-08 | 5.53E-07 | bradyzoite antigen BAG1                                                |
| TGME49_216130 | -2.29 | 6.73 | 4.67E-08 | 5.53E-07 | ubiquitin conjugating enzyme E2, putative                              |
| TGME49_274010 | -4.26 | 6.06 | 4.78E-08 | 5.64E-07 | hypothetical protein                                                   |
| TGME49_225745 | -9.21 | 6.00 | 4.80E-08 | 5.65E-07 | hypothetical protein                                                   |
| TGME49_311110 | -4.24 | 5.89 | 4.84E-08 | 5.69E-07 | Ubiquitin-fold modifier 1 precursor family protein, putative           |
| TGME49_202980 | -2.28 | 7.20 | 5.07E-08 | 5.95E-07 | hypothetical protein                                                   |
| TGME49_230190 | -2.17 | 6.88 | 5.10E-08 | 5.97E-07 | hypothetical protein                                                   |
| TGME49_201680 | -1.14 | 8.83 | 5.14E-08 | 6.00E-07 | eukaryotic initiation factor-3 subunit 10, putative                    |
| TGME49_306460 | -9.19 | 5.67 | 5.14E-08 | 6.00E-07 | bromodomain-containing protein                                         |
| TGME49_203840 | 1.84  | 5.77 | 5.19E-08 | 6.06E-07 | DEAD/DEAH box helicase domain-containing protein                       |
| TGME49_311090 | -1.64 | 7.32 | 5.24E-08 | 6.10E-07 | ubiquitin carboxyl-terminal hydrolase                                  |
| TGME49_286630 | -1.63 | 7.93 | 5.28E-08 | 6.13E-07 | redoxin domain-containing protein                                      |
| TGME49_258580 | -1.04 | 9.75 | 5.33E-08 | 6.18E-07 | rhopty protein ROP17                                                   |
| TGME49_215420 | -9.16 | 5.72 | 5.37E-08 | 6.22E-07 | SNARE protein                                                          |
| TGME49_223010 | -3.05 | 6.45 | 5.58E-08 | 6.46E-07 | hypothetical protein                                                   |
| TGME49_264080 | -1.60 | 8.18 | 5.60E-08 | 6.47E-07 | acyl carrier protein ACP                                               |
| TGME49_288530 | 1.62  | 6.22 | 5.75E-08 | 6.63E-07 | NOL1/NOP2/sun family protein                                           |
| TGME49_253880 | 1.18  | 8.10 | 5.83E-08 | 6.72E-07 | GNS1/SUR4 family protein                                               |
| TGME49_230430 | -9.16 | 5.34 | 5.89E-08 | 6.77E-07 | vesicle-associated membrane protein, putative                          |
| TGME49_273350 | 2.12  | 5.36 | 6.01E-08 | 6.90E-07 | molybdopterin converting factor, subunit 2 protein                     |
| TGME49_309990 | 3.23  | 6.06 | 6.07E-08 | 6.96E-07 | hypothetical protein                                                   |
| TGME49_310530 | -4.26 | 6.15 | 6.08E-08 | 6.96E-07 | SNF2 family N-terminal domain-containing protein                       |
| TGME49_227380 | 1.17  | 9.57 | 6.15E-08 | 7.03E-07 | hypothetical protein                                                   |
| TGME49_278800 | -1.89 | 7.62 | 6.18E-08 | 7.05E-07 | zinc finger protein 36 family 3 protein                                |
| TGME49_207370 | 1.01  | 8.45 | 6.34E-08 | 7.22E-07 | hypothetical protein                                                   |
| TGME49_201820 | 1.51  | 6.72 | 6.41E-08 | 7.28E-07 | hypothetical protein                                                   |
| TGME49_229780 | -4.23 | 5.86 | 6.41E-08 | 7.28E-07 | GHMP kinase, N-terminal domain-containing protein                      |
| TGME49_204280 | 1.28  | 7.67 | 6.43E-08 | 7.29E-07 | cell-cycle-associated protein kinase DYRK, putative                    |
| TGME49_229480 | -1.02 | 9.72 | 6.84E-08 | 7.73E-07 | calcium binding protein precursor, putative                            |
| TGME49_231160 | -1.01 | 9.22 | 6.93E-08 | 7.81E-07 | hypothetical protein                                                   |
| TGME49_213920 | -3.03 | 6.79 | 6.95E-08 | 7.82E-07 | hypothetical protein                                                   |
| TGME49_227948 | -1.37 | 8.32 | 7.28E-08 | 8.19E-07 | peptidase M16 inactive domain-containing protein                       |
| TGME49_269010 | 1.36  | 9.54 | 7.31E-08 | 8.21E-07 | AP2 domain transcription factor AP2VIII-7                              |
| TGME49_268580 | -4.26 | 6.06 | 7.44E-08 | 8.33E-07 | hypothetical protein                                                   |
| TGME49_208820 | -4.32 | 5.82 | 7.51E-08 | 8.40E-07 | 1-deoxy-D-xylulose-5-phosphate synthase                                |
| TGME49_218820 | -1.92 | 8.78 | 7.57E-08 | 8.46E-07 | alba 2                                                                 |
| TGME49_269980 | -1.07 | 9.36 | 7.81E-08 | 8.69E-07 | preprotein translocase Sec61, putative                                 |
| TGME49_207620 | -1.28 | 7.92 | 8.01E-08 | 8.88E-07 | pyridine nucleotide-disulfide oxidoreductase domain-containing protein |
| TGME49_297870 | -2.31 | 6.90 | 8.02E-08 | 8.88E-07 | hypothetical protein                                                   |
| TGME49_240570 | -2.61 | 6.80 | 8.01E-08 | 8.88E-07 | hypothetical protein                                                   |
| TGME49_247580 | -9.15 | 5.86 | 8.01E-08 | 8.88E-07 | glutaredoxin domain-containing protein                                 |
| TGME49_214230 | 1.24  | 6.85 | 8.31E-08 | 9.18E-07 | Dopey, N-terminal domain-containing protein                            |
| TGME49_229370 | -4.19 | 5.92 | 8.35E-08 | 9.21E-07 | AP2 domain transcription factor AP2VIII-1                              |
| TGME49_206605 | 2.24  | 5.59 | 8.42E-08 | 9.28E-07 | hypothetical protein                                                   |
| TGME49_306510 | 3.54  | 5.11 | 8.47E-08 | 9.32E-07 | hypothetical protein                                                   |
| TGME49_311070 | -3.50 | 6.42 | 8.52E-08 | 9.36E-07 | hypothetical protein                                                   |
| TGME49_241880 | -1.35 | 8.19 | 9.23E-08 | 1.01E-06 | 3'5'-cyclic nucleotide phosphodiesterase domain-containing protein     |
| TGME49_254030 | 1.86  | 8.18 | 9.25E-08 | 1.01E-06 | zinc finger CDGSH-type domain-containing protein                       |
| TGME49_313780 | -1.69 | 7.72 | 9.27E-08 | 1.01E-06 | hypothetical protein                                                   |
| TGME49_207770 | -1.66 | 7.77 | 9.31E-08 | 1.02E-06 | PCI domain-containing protein                                          |
| TGME49_249360 | -2.24 | 6.90 | 9.61E-08 | 1.05E-06 | RED family protein                                                     |

|               |       |      |          |          |                                                             |
|---------------|-------|------|----------|----------|-------------------------------------------------------------|
| TGME49_294290 | -2.21 | 7.07 | 9.64E-08 | 1.05E-06 | Der1ER1                                                     |
| TGME49_232560 | -2.40 | 6.98 | 9.64E-08 | 1.05E-06 | hypothetical protein                                        |
| TGME49_278975 | -2.23 | 6.87 | 9.81E-08 | 1.07E-06 | ICE family protease (caspase) p20 domain-containing pro     |
| TGME49_269420 | 1.21  | 7.98 | 1.01E-07 | 1.10E-06 | hypothetical protein                                        |
| TGME49_216070 | -9.10 | 5.74 | 1.04E-07 | 1.13E-06 | hypothetical protein                                        |
| TGME49_271350 | -9.10 | 5.41 | 1.12E-07 | 1.20E-06 | bifunctional protein FolC subfamily protein                 |
| TGME49_226030 | -1.35 | 8.61 | 1.15E-07 | 1.24E-06 | AGC kinase                                                  |
| TGME49_231910 | -1.74 | 7.36 | 1.15E-07 | 1.24E-06 | ATP synthase F1 gamma subunit                               |
| TGME49_256770 | -1.47 | 7.59 | 1.16E-07 | 1.25E-06 | eukaryotic translation initiation factor 4A, isoform 3, put |
| TGME49_266470 | -9.09 | 5.57 | 1.16E-07 | 1.25E-06 | hypothetical protein                                        |
| TGME49_208780 | -3.00 | 6.22 | 1.18E-07 | 1.27E-06 | ubiquitin-conjugating enzyme subfamily protein              |
| TGME49_272010 | -4.20 | 6.12 | 1.23E-07 | 1.31E-06 | Gar1 protein RNA binding region protein                     |
| TGME49_307820 | 1.77  | 5.87 | 1.24E-07 | 1.32E-06 | hypothetical protein                                        |
| TGME49_236550 | -1.54 | 7.92 | 1.24E-07 | 1.32E-06 | hypothetical protein                                        |
| TGME49_203350 | -9.18 | 5.69 | 1.25E-07 | 1.32E-06 | hypothetical protein                                        |
| TGME49_248860 | 1.86  | 5.75 | 1.28E-07 | 1.35E-06 | hypothetical protein                                        |
| TGME49_232160 | 1.33  | 6.85 | 1.28E-07 | 1.35E-06 | zinc finger, C3HC4 type (RING finger) domain-containing     |
| TGME49_215290 | -4.16 | 5.79 | 1.33E-07 | 1.40E-06 | saccharopine dehydrogenase domain-containing protein        |
| TGME49_215460 | -1.56 | 9.58 | 1.33E-07 | 1.40E-06 | ribosomal protein RPS24                                     |
| TGME49_314920 | 2.18  | 5.56 | 1.38E-07 | 1.45E-06 | hypothetical protein                                        |
| TGME49_262640 | -1.53 | 7.82 | 1.39E-07 | 1.46E-06 | Cg8 family protein                                          |
| TGME49_268960 | -3.38 | 6.09 | 1.39E-07 | 1.46E-06 | 5'-AMP-activated protein kinase subunit beta-1 family p     |
| TGME49_271010 | 3.30  | 5.05 | 1.42E-07 | 1.48E-06 | hypothetical protein                                        |
| TGME49_244500 | -1.75 | 7.47 | 1.42E-07 | 1.48E-06 | Tubulin-tyrosine ligase family protein                      |
| TGME49_268890 | -1.90 | 7.12 | 1.42E-07 | 1.48E-06 | citrate synthase I                                          |
| TGME49_235398 | -9.07 | 5.77 | 1.42E-07 | 1.48E-06 | hypothetical protein                                        |
| TGME49_311390 | 2.33  | 5.11 | 1.43E-07 | 1.49E-06 | tRNA (guanine(9)-N(1))-methyltransferase                    |
| TGME49_313330 | -9.34 | 5.76 | 1.44E-07 | 1.50E-06 | rhoptry kinase family protein ROP27                         |
| TGME49_313830 | -2.96 | 6.34 | 1.45E-07 | 1.50E-06 | AARP2CN (NUC121) domain-containing protein                  |
| TGME49_221295 | -4.16 | 5.92 | 1.47E-07 | 1.53E-06 | hypothetical protein                                        |
| TGME49_306030 | -1.89 | 7.04 | 1.49E-07 | 1.54E-06 | glutathione s-transferase, n-terminal domain containing     |
| TGME49_227030 | -2.14 | 6.87 | 1.52E-07 | 1.56E-06 | hypothetical protein                                        |
| TGME49_249790 | -4.15 | 5.87 | 1.51E-07 | 1.56E-06 | hypothetical protein                                        |
| TGME49_270550 | -9.15 | 5.78 | 1.53E-07 | 1.57E-06 | gamma-glutamyl phosphate reductase, putative                |
| TGME49_254470 | 1.10  | 9.18 | 1.55E-07 | 1.59E-06 | hypothetical protein                                        |
| TGME49_231200 | -2.96 | 6.19 | 1.58E-07 | 1.62E-06 | hypothetical protein                                        |
| TGME49_251680 | -1.49 | 8.93 | 1.66E-07 | 1.70E-06 | histamine-releasing factor, putative                        |
| TGME49_216630 | -9.05 | 5.35 | 1.66E-07 | 1.70E-06 | trigger factor protein, putative                            |
| TGME49_227140 | 3.00  | 4.81 | 1.68E-07 | 1.72E-06 | hypothetical protein                                        |
| TGME49_289310 | -2.38 | 6.67 | 1.73E-07 | 1.76E-06 | cullin family protein                                       |
| TGME49_296015 | 1.78  | 6.18 | 1.76E-07 | 1.79E-06 | hypothetical protein                                        |
| TGME49_247960 | 1.46  | 6.05 | 1.76E-07 | 1.79E-06 | hypothetical protein                                        |
| TGME49_314700 | 1.31  | 7.77 | 1.80E-07 | 1.82E-06 | hypothetical protein                                        |
| TGME49_263500 | -4.19 | 5.93 | 1.80E-07 | 1.82E-06 | vacuolar protein sorting-associated protein 26, putative    |
| TGME49_253440 | 1.08  | 9.25 | 1.81E-07 | 1.83E-06 | cell-cycle-associated protein kinase SRPK, putative         |
| TGME49_238970 | -9.70 | 5.17 | 1.88E-07 | 1.90E-06 | hypothetical protein                                        |
| TGME49_306470 | -2.66 | 6.39 | 1.88E-07 | 1.90E-06 | isoprenylcysteine carboxyl methyltransferase (icmt) fam     |
| TGME49_226430 | -1.31 | 8.72 | 1.89E-07 | 1.90E-06 | reticulon protein                                           |
| TGME49_230950 | -9.09 | 5.62 | 1.93E-07 | 1.94E-06 | hypothetical protein                                        |
| TGME49_209700 | -4.13 | 5.90 | 1.96E-07 | 1.97E-06 | hypothetical protein                                        |
| TGME49_285490 | -9.07 | 5.57 | 1.97E-07 | 1.97E-06 | helix-hairpin-helix motif domain-containing protein         |
| TGME49_241890 | -9.04 | 5.67 | 1.98E-07 | 1.99E-06 | hypothetical protein                                        |
| TGME49_217350 | -9.07 | 5.39 | 2.09E-07 | 2.09E-06 | methyltransferase MTA70, putative                           |
| TGME49_259240 | 1.03  | 9.56 | 2.12E-07 | 2.11E-06 | ribosomal protein RPS21                                     |
| TGME49_254290 | 1.66  | 6.05 | 2.18E-07 | 2.17E-06 | hypothetical protein                                        |
| TGME49_235490 | -1.85 | 7.03 | 2.19E-07 | 2.17E-06 | hypothetical protein                                        |
| TGME49_314540 | -9.02 | 5.67 | 2.19E-07 | 2.17E-06 | hypothetical protein                                        |



|               |       |      |          |          |                                                       |
|---------------|-------|------|----------|----------|-------------------------------------------------------|
| TGME49_305980 | -2.14 | 7.06 | 2.23E-07 | 2.21E-06 | pyruvate dehydrogenase complex subunit PDH-E3I        |
| TGME49_214900 | 1.39  | 7.26 | 2.25E-07 | 2.23E-06 | hypothetical protein                                  |
| TGME49_248890 | -2.93 | 6.03 | 2.26E-07 | 2.23E-06 | actin-like protein ALP3b                              |
| TGME49_295658 | -3.34 | 6.32 | 2.31E-07 | 2.28E-06 | zinc finger in N-recogin protein                      |
| TGME49_270800 | -4.23 | 6.03 | 2.34E-07 | 2.31E-06 | GAF domain-containing protein                         |
| TGME49_266750 | -1.53 | 7.68 | 2.38E-07 | 2.34E-06 | transporter/permease protein, putative                |
| TGME49_217360 | -3.36 | 5.95 | 2.39E-07 | 2.35E-06 | hypothetical protein                                  |
| TGME49_293860 | -9.03 | 5.58 | 2.40E-07 | 2.36E-06 | hypothetical protein                                  |
| TGME49_242870 | -9.02 | 5.35 | 2.43E-07 | 2.38E-06 | histone lysine methyltransferase, SET, putative       |
| TGME49_286650 | -9.01 | 5.60 | 2.56E-07 | 2.50E-06 | hypothetical protein                                  |
| TGME49_293740 | 1.56  | 8.89 | 2.62E-07 | 2.55E-06 | hypothetical protein                                  |
| TGME49_248260 | 1.66  | 6.49 | 2.65E-07 | 2.58E-06 | hypothetical protein                                  |
| TGME49_250220 | 2.46  | 5.45 | 2.66E-07 | 2.58E-06 | hypothetical protein                                  |
| TGME49_207100 | -8.99 | 5.81 | 2.75E-07 | 2.67E-06 | hypothetical protein                                  |
| TGME49_278440 | -2.07 | 6.87 | 2.77E-07 | 2.68E-06 | SWI2/SNF2 Brahma-like putative                        |
| TGME49_222290 | -4.11 | 5.85 | 2.78E-07 | 2.68E-06 | LSM domain-containing protein                         |
| TGME49_248160 | -9.03 | 5.47 | 2.79E-07 | 2.69E-06 | hypothetical protein                                  |
| TGME49_210980 | 1.67  | 6.94 | 2.81E-07 | 2.71E-06 | alternative splicing type 3 and, putative             |
| TGME49_227060 | -9.03 | 5.72 | 2.82E-07 | 2.71E-06 | hypothetical protein                                  |
| TGME49_203740 | -2.36 | 6.73 | 2.88E-07 | 2.76E-06 | hypothetical protein                                  |
| TGME49_313400 | -2.09 | 7.11 | 2.95E-07 | 2.83E-06 | DnaJ domain-containing protein                        |
| TGME49_291020 | -2.06 | 6.79 | 3.06E-07 | 2.93E-06 | myosin head (motor domain) domain-containing protein  |
| TGME49_229630 | 1.10  | 8.70 | 3.16E-07 | 3.01E-06 | eIF2 kinase IF2K-A (incomplete catalytic triad)       |
| TGME49_224310 | -9.06 | 5.58 | 3.16E-07 | 3.01E-06 | DHHC zinc finger domain-containing protein            |
| TGME49_228770 | -4.13 | 5.98 | 3.23E-07 | 3.07E-06 | hypothetical protein                                  |
| TGME49_218362 | -2.30 | 6.89 | 3.23E-07 | 3.07E-06 | zinc finger protein ZFP1                              |
| TGME49_214200 | -9.04 | 5.94 | 3.25E-07 | 3.09E-06 | WD domain, G-beta repeat-containing protein           |
| TGME49_310670 | -1.38 | 7.93 | 3.32E-07 | 3.15E-06 | glycogen phosphorylase 1, putative                    |
| TGME49_210478 | 5.25  | 4.78 | 3.33E-07 | 3.16E-06 | hypothetical protein                                  |
| TGME49_225770 | -8.97 | 5.71 | 3.44E-07 | 3.25E-06 | Tyrosine kinase-like (TKL) protein                    |
| TGME49_208500 | -2.68 | 6.45 | 3.47E-07 | 3.28E-06 | protein phosphatase 2C domain-containing protein      |
| TGME49_313290 | 1.19  | 6.91 | 3.49E-07 | 3.28E-06 | MORN repeat-containing protein                        |
| TGME49_244110 | -1.59 | 8.05 | 3.58E-07 | 3.37E-06 | nucleosome assembly protein (nap) protein             |
| TGME49_312300 | -1.71 | 7.41 | 3.59E-07 | 3.37E-06 | Sec7 domain-containing protein                        |
| TGME49_209280 | -4.08 | 6.12 | 3.64E-07 | 3.41E-06 | hypothetical protein                                  |
| TGME49_311870 | -2.45 | 6.63 | 3.67E-07 | 3.44E-06 | WD domain, G-beta repeat-containing protein           |
| TGME49_301440 | -1.17 | 9.35 | 3.78E-07 | 3.54E-06 | calcium-dependent protein kinase CDPK1                |
| TGME49_259520 | -9.00 | 5.47 | 3.78E-07 | 3.54E-06 | hypothetical protein                                  |
| TGME49_271870 | -8.96 | 5.32 | 3.80E-07 | 3.54E-06 | zinc carboxypeptidase superfamily protein             |
| TGME49_310230 | -9.01 | 5.63 | 3.80E-07 | 3.54E-06 | hypothetical protein                                  |
| TGME49_275990 | 1.41  | 6.58 | 3.86E-07 | 3.59E-06 | hypothetical protein                                  |
| TGME49_278630 | -8.95 | 5.70 | 3.88E-07 | 3.60E-06 | tetratricopeptide repeat-containing protein           |
| TGME49_245730 | -8.95 | 5.76 | 3.92E-07 | 3.64E-06 | phosphatidylinositol-4-phosphate 5-Kinase             |
| TGME49_210230 | -9.02 | 5.90 | 3.96E-07 | 3.67E-06 | hypothetical protein                                  |
| TGME49_238040 | -1.90 | 6.79 | 3.97E-07 | 3.68E-06 | protein disulfide-isomerase domain-containing protein |
| TGME49_213870 | -1.72 | 6.92 | 4.02E-07 | 3.71E-06 | UBA/TS-N domain-containing protein                    |
| TGME49_282190 | -1.51 | 7.07 | 4.05E-07 | 3.73E-06 | hydrolase, NUDIX family protein                       |
| TGME49_252870 | 2.35  | 4.88 | 4.06E-07 | 3.74E-06 | hypothetical protein                                  |
| TGME49_315250 | -4.09 | 6.00 | 4.16E-07 | 3.82E-06 | GAMM1 protein, putative                               |
| TGME49_221720 | -4.40 | 6.44 | 4.16E-07 | 3.82E-06 | hypothetical protein                                  |
| TGME49_310570 | -9.12 | 5.49 | 4.17E-07 | 3.82E-06 | hypothetical protein                                  |
| TGME49_284190 | -3.49 | 6.62 | 4.26E-07 | 3.90E-06 | pyruvate carboxylase                                  |
| TGME49_238110 | -2.69 | 6.29 | 4.28E-07 | 3.91E-06 | replication factor a protein 3 protein                |
| TGME49_264220 | -8.96 | 5.51 | 4.31E-07 | 3.94E-06 | hypothetical protein                                  |
| TGME49_219800 | -1.29 | 8.18 | 4.35E-07 | 3.97E-06 | vacuolar ATP synthase subunit b, putative             |
| TGME49_240370 | 8.58  | 4.77 | 4.47E-07 | 4.08E-06 | Toxoplasma gondii family E protein                    |
| TGME49_254230 | 1.89  | 5.65 | 4.55E-07 | 4.14E-06 | hypothetical protein                                  |

|               |       |       |          |          |                                                          |
|---------------|-------|-------|----------|----------|----------------------------------------------------------|
| TGME49_224540 | -9.10 | 6.05  | 4.81E-07 | 4.38E-06 | hypothetical protein                                     |
| TGME49_202572 | -8.95 | 5.64  | 4.89E-07 | 4.44E-06 | ribophorin i protein                                     |
| TGME49_289640 | 2.07  | 5.64  | 4.93E-07 | 4.47E-06 | hypothetical protein                                     |
| TGME49_207800 | -8.93 | 5.28  | 5.06E-07 | 4.58E-06 | hypothetical protein                                     |
| TGME49_246160 | 2.70  | 4.93  | 5.13E-07 | 4.64E-06 | hypothetical protein                                     |
| TGME49_266450 | 1.34  | 6.38  | 5.14E-07 | 4.64E-06 | lysine decarboxylase family protein                      |
| TGME49_245485 | 2.12  | 6.56  | 5.18E-07 | 4.68E-06 | microneme protein MIC9                                   |
| TGME49_300290 | -8.98 | 5.41  | 5.27E-07 | 4.75E-06 | SNARE domain-containing protein                          |
| TGME49_274000 | -2.90 | 6.01  | 5.43E-07 | 4.87E-06 | hypothetical protein                                     |
| TGME49_208970 | -1.95 | 6.92  | 5.43E-07 | 4.88E-06 | RNA recognition motif-containing protein                 |
| TGME49_200360 | 1.90  | 9.74  | 5.54E-07 | 4.96E-06 | hypothetical protein                                     |
| TGME49_305560 | -4.05 | 5.81  | 5.54E-07 | 4.96E-06 | Vps51/Vps67 protein                                      |
| TGME49_222860 | -1.33 | 8.81  | 5.60E-07 | 5.00E-06 | eukaryotic translation initiation factor, putative       |
| TGME49_216500 | -4.05 | 5.77  | 5.61E-07 | 5.01E-06 | tRNA synthetase, putative                                |
| TGME49_205000 | -8.94 | 5.59  | 5.64E-07 | 5.03E-06 | phosphoglycerate mutase family protein                   |
| TGME49_290660 | -1.01 | 9.43  | 6.14E-07 | 5.46E-06 | RNA recognition motif-containing protein                 |
| TGME49_214370 | -8.91 | 5.49  | 6.25E-07 | 5.54E-06 | hypothetical protein                                     |
| TGME49_239580 | -9.11 | 4.82  | 6.37E-07 | 5.65E-06 | hypothetical protein                                     |
| TGME49_263000 | 1.31  | 7.22  | 6.46E-07 | 5.72E-06 | Beige/BEACH domain-containing protein                    |
| TGME49_292610 | -8.91 | 4.84  | 6.47E-07 | 5.72E-06 | Toxoplasma gondii family C protein                       |
| TGME49_293440 | -1.64 | 7.35  | 6.49E-07 | 5.74E-06 | hypothetical protein                                     |
| TGME49_305470 | -8.93 | 5.79  | 6.52E-07 | 5.75E-06 | hypothetical protein                                     |
| TGME49_243410 | -4.05 | 5.61  | 6.71E-07 | 5.90E-06 | tetratricopeptide repeat-containing protein              |
| TGME49_227580 | -1.59 | 7.61  | 6.73E-07 | 5.92E-06 | transmembrane amino acid transporter protein             |
| TGME49_252390 | 1.12  | 8.54  | 6.81E-07 | 5.98E-06 | hypothetical protein                                     |
| TGME49_285970 | -8.90 | 5.58  | 6.84E-07 | 6.00E-06 | 30S ribosomal protein S5, putative                       |
| TGME49_280730 | -8.90 | 5.83  | 6.86E-07 | 6.01E-06 | cytosolic fe-s cluster assembling factor nbp35, putative |
| TGME49_297760 | -8.91 | 5.12  | 6.88E-07 | 6.02E-06 | hypothetical protein                                     |
| TGME49_202120 | -1.59 | 7.31  | 6.89E-07 | 6.02E-06 | hypothetical protein                                     |
| TGME49_306910 | -2.37 | 6.36  | 6.91E-07 | 6.03E-06 | hypothetical protein                                     |
| TGME49_212140 | -4.21 | 6.11  | 6.92E-07 | 6.04E-06 | hypothetical protein                                     |
| TGME49_242055 | -8.91 | 5.77  | 6.97E-07 | 6.07E-06 | DEAD/DEAH box helicase domain-containing protein         |
| TGME49_239620 | -4.01 | 5.74  | 7.27E-07 | 6.32E-06 | 5'-nucleotidase, C-terminal domain-containing protein    |
| TGME49_270090 | -3.26 | 6.03  | 7.38E-07 | 6.40E-06 | hypothetical protein                                     |
| TGME49_286260 | -8.89 | 5.83  | 7.43E-07 | 6.44E-06 | tetratricopeptide repeat-containing protein              |
| TGME49_217420 | -4.14 | 6.00  | 7.54E-07 | 6.53E-06 | hypothetical protein                                     |
| TGME49_265010 | -8.88 | 5.64  | 7.76E-07 | 6.71E-06 | glutamate 5-kinase domain-containing protein             |
| TGME49_221630 | -3.23 | 5.92  | 8.10E-07 | 6.99E-06 | hypothetical protein                                     |
| TGME49_288570 | -3.23 | 5.83  | 8.09E-07 | 6.99E-06 | hypothetical protein                                     |
| TGME49_236630 | -1.36 | 7.56  | 8.15E-07 | 7.02E-06 | hypothetical protein                                     |
| TGME49_319880 | -4.00 | 6.31  | 8.23E-07 | 7.08E-06 | MORN repeat-containing protein                           |
| TGME49_249250 | 1.14  | 10.07 | 8.36E-07 | 7.19E-06 | ribosomal protein RPL35A                                 |
| TGME49_306410 | -4.00 | 5.79  | 8.55E-07 | 7.34E-06 | hypothetical protein                                     |
| TGME49_220430 | -8.87 | 5.67  | 8.56E-07 | 7.34E-06 | hypothetical protein                                     |
| TGME49_285510 | -1.44 | 7.24  | 8.62E-07 | 7.38E-06 | hypothetical protein                                     |
| TGME49_314970 | -1.54 | 7.24  | 8.73E-07 | 7.47E-06 | root hair defective 3 gtp-binding protein (rhd3) protein |
| TGME49_256880 | -8.89 | 5.54  | 8.78E-07 | 7.50E-06 | protein kinase domain-containing protein                 |
| TGME49_224020 | 1.43  | 6.33  | 8.79E-07 | 7.51E-06 | hypothetical protein                                     |
| TGME49_266100 | 1.28  | 6.94  | 8.87E-07 | 7.56E-06 | rhoptry kinase family protein ROP41                      |
| TGME49_295080 | -8.87 | 5.79  | 8.99E-07 | 7.66E-06 | hypothetical protein                                     |
| TGME49_301400 | 1.69  | 9.99  | 9.09E-07 | 7.73E-06 | hypothetical protein                                     |
| TGME49_268910 | 1.66  | 5.89  | 9.11E-07 | 7.73E-06 | signal peptidase I protein                               |
| TGME49_267670 | 1.90  | 5.56  | 9.16E-07 | 7.77E-06 | hypothetical protein                                     |
| TGME49_242850 | -2.81 | 5.93  | 9.30E-07 | 7.88E-06 | hypothetical protein                                     |
| TGME49_216430 | -1.58 | 7.55  | 9.54E-07 | 8.07E-06 | TBC domain-containing protein                            |
| TGME49_271470 | -3.99 | 6.12  | 9.54E-07 | 8.07E-06 | hypothetical protein                                     |
| TGME49_214520 | 1.79  | 5.70  | 9.56E-07 | 8.07E-06 | general transcription factor IIH polypeptide 4 GTF2H4    |



|               |       |      |          |          |                                                              |
|---------------|-------|------|----------|----------|--------------------------------------------------------------|
| TGME49_314730 | -3.97 | 5.86 | 1.56E-06 | 1.23E-05 | ALG6, ALG8 glycosyltransferase family protein                |
| TGME49_310910 | -8.88 | 5.61 | 1.56E-06 | 1.23E-05 | WD domain, G-beta repeat-containing protein                  |
| TGME49_242110 | -8.92 | 4.87 | 1.56E-06 | 1.23E-05 | rhoptry kinase family protein ROP38                          |
| TGME49_227320 | -8.94 | 5.44 | 1.56E-06 | 1.23E-05 | hypothetical protein                                         |
| TGME49_222210 | -8.80 | 5.46 | 1.57E-06 | 1.23E-05 | SPFH domain / Band 7 family protein                          |
| TGME49_260320 | -2.79 | 6.27 | 1.57E-06 | 1.23E-05 | Noc2p family protein                                         |
| TGME49_274110 | -8.80 | 5.68 | 1.58E-06 | 1.24E-05 | glycoprotease family protein                                 |
| TGME49_278720 | -8.84 | 5.75 | 1.62E-06 | 1.27E-05 | hypothetical protein                                         |
| TGME49_286560 | -8.93 | 5.40 | 1.63E-06 | 1.27E-05 | U6 snRNA-associated Sm family protein                        |
| TGME49_300020 | -3.92 | 5.75 | 1.64E-06 | 1.28E-05 | ATP-dependent metalloproteinase HflB subfamily protein       |
| TGME49_268760 | -1.21 | 8.36 | 1.65E-06 | 1.29E-05 | hypothetical protein                                         |
| TGME49_241180 | -1.49 | 7.10 | 1.69E-06 | 1.32E-05 | hypothetical protein                                         |
| TGME49_282000 | 1.43  | 6.72 | 1.70E-06 | 1.33E-05 | hypothetical protein                                         |
| TGME49_313180 | -1.09 | 8.40 | 1.73E-06 | 1.34E-05 | cell-cycle-associated protein kinase PRP4, putative          |
| TGME49_286740 | 3.41  | 5.13 | 1.73E-06 | 1.34E-05 | microneme-like protein                                       |
| TGME49_276990 | -3.93 | 5.48 | 1.73E-06 | 1.34E-05 | cytochrome b5 family heme/steroid binding domain-con         |
| TGME49_246460 | -3.97 | 5.93 | 1.73E-06 | 1.34E-05 | hypothetical protein                                         |
| TGME49_202470 | -8.80 | 5.84 | 1.73E-06 | 1.34E-05 | rRNA metabolism protein, SBDS family protein                 |
| TGME49_213900 | 1.12  | 7.70 | 1.74E-06 | 1.34E-05 | regulator of chromosome condensation RCC1                    |
| TGME49_313160 | -3.20 | 5.73 | 1.74E-06 | 1.35E-05 | hypothetical protein                                         |
| TGME49_281990 | 1.70  | 5.47 | 1.76E-06 | 1.36E-05 | Nicotinamidase                                               |
| TGME49_289290 | -1.92 | 7.07 | 1.78E-06 | 1.37E-05 | hypothetical protein                                         |
| TGME49_313350 | -3.92 | 5.75 | 1.78E-06 | 1.37E-05 | hypothetical protein                                         |
| TGME49_215210 | 2.76  | 6.31 | 1.79E-06 | 1.38E-05 | hypothetical protein                                         |
| TGME49_225480 | -3.93 | 5.99 | 1.79E-06 | 1.38E-05 | hypothetical protein                                         |
| TGME49_224660 | 1.20  | 6.78 | 1.81E-06 | 1.39E-05 | transcription factor s-ii (tfiis), central domain-containing |
| TGME49_213790 | -2.78 | 6.32 | 1.82E-06 | 1.39E-05 | hypothetical protein                                         |
| TGME49_243960 | -1.09 | 8.61 | 1.83E-06 | 1.40E-05 | nuclear transport factor 2 (ntf2) domain-containing prot     |
| TGME49_308020 | -1.24 | 7.95 | 1.87E-06 | 1.43E-05 | SAG-related sequence SRS57                                   |
| TGME49_233030 | -1.11 | 8.26 | 1.87E-06 | 1.43E-05 | gliding-associated protein GAP70                             |
| TGME49_236890 | 1.14  | 7.15 | 1.88E-06 | 1.43E-05 | hypothetical protein                                         |
| TGME49_240520 | -8.80 | 5.59 | 1.88E-06 | 1.43E-05 | hypothetical protein                                         |
| TGME49_267330 | -2.30 | 6.42 | 1.91E-06 | 1.45E-05 | fumarate hydratase                                           |
| TGME49_225470 | 1.35  | 6.28 | 1.93E-06 | 1.46E-05 | peptide methionine sulfoxide reductase                       |
| TGME49_264030 | -1.99 | 6.63 | 1.93E-06 | 1.46E-05 | aminotransferase, putative                                   |
| TGME49_247330 | -2.07 | 6.92 | 1.93E-06 | 1.46E-05 | hypothetical protein                                         |
| TGME49_212150 | -8.79 | 5.30 | 1.96E-06 | 1.48E-05 | hypothetical protein                                         |
| TGME49_216620 | -1.15 | 8.10 | 1.97E-06 | 1.49E-05 | EF hand domain-containing protein                            |
| TGME49_248880 | -1.41 | 7.90 | 1.98E-06 | 1.49E-05 | GTPase RAB7                                                  |
| TGME49_297800 | -2.56 | 6.62 | 2.02E-06 | 1.52E-05 | RecF/RecN/SMC N terminal domain-containing protein           |
| TGME49_205460 | -8.77 | 5.47 | 2.07E-06 | 1.55E-05 | AN1 family Zinc finger domain-containing protein             |
| TGME49_318410 | -1.37 | 7.53 | 2.11E-06 | 1.58E-05 | TCP-1 chaperonin, putative                                   |
| TGME49_251850 | -1.73 | 7.02 | 2.11E-06 | 1.58E-05 | serine/threonine protein phosphatase                         |
| TGME49_247380 | -8.78 | 5.36 | 2.12E-06 | 1.58E-05 | hypothetical protein                                         |
| TGME49_252500 | 1.13  | 7.74 | 2.13E-06 | 1.59E-05 | polo kinase                                                  |
| TGME49_231480 | -1.60 | 7.27 | 2.20E-06 | 1.64E-05 | GCN1, putative                                               |
| TGME49_219140 | -1.77 | 6.80 | 2.21E-06 | 1.65E-05 | EF-1 guanine nucleotide exchange domain-containing pr        |
| TGME49_264090 | -3.20 | 6.14 | 2.22E-06 | 1.65E-05 | hypothetical protein                                         |
| TGME49_311500 | -8.88 | 5.49 | 2.22E-06 | 1.65E-05 | ThiF family protein                                          |
| TGME49_209260 | -1.17 | 8.33 | 2.24E-06 | 1.66E-05 | cytochrome c oxidase subunit, putative                       |
| TGME49_248640 | -1.50 | 7.36 | 2.24E-06 | 1.66E-05 | regulator of chromosome condensation (RCC1) repeat-c         |
| TGME49_269660 | -2.16 | 6.75 | 2.29E-06 | 1.70E-05 | TFIIF basal transcription factor complex helicase XPB sub    |
| TGME49_261070 | -3.15 | 6.54 | 2.29E-06 | 1.70E-05 | apicoplast triosephosphate translocator APT1                 |
| TGME49_278850 | -1.26 | 7.92 | 2.32E-06 | 1.71E-05 | DHHC zinc finger domain-containing protein                   |
| TGME49_311150 | -3.92 | 5.60 | 2.33E-06 | 1.72E-05 | hypothetical protein                                         |
| TGME49_313418 | -8.87 | 5.19 | 2.36E-06 | 1.74E-05 | hypothetical protein                                         |
| TGME49_202680 | -1.56 | 8.26 | 2.38E-06 | 1.75E-05 | peptidase M16, alpha subunit, putative                       |

|               |       |       |          |          |                                                            |
|---------------|-------|-------|----------|----------|------------------------------------------------------------|
| TGME49_272320 | 1.74  | 5.67  | 2.40E-06 | 1.77E-05 | DHHC zinc finger domain-containing protein                 |
| TGME49_252380 | 1.82  | 6.44  | 2.44E-06 | 1.79E-05 | hypothetical protein                                       |
| TGME49_285840 | 1.80  | 6.34  | 2.45E-06 | 1.80E-05 | RAP domain-containing protein                              |
| TGME49_271780 | -2.75 | 6.36  | 2.45E-06 | 1.80E-05 | Filamin/ABP280 repeat-containing protein                   |
| TGME49_233790 | -8.77 | 5.24  | 2.47E-06 | 1.81E-05 | serine/threonine protein kinase AktR, putative             |
| TGME49_222930 | -2.32 | 6.77  | 2.48E-06 | 1.81E-05 | hypothetical protein                                       |
| TGME49_320450 | -3.22 | 6.15  | 2.53E-06 | 1.84E-05 | ribosome biogenesis regulatory protein (rrs1) protein      |
| TGME49_259200 | -3.90 | 6.05  | 2.53E-06 | 1.84E-05 | Na <sup>+</sup> /H <sup>+</sup> exchanger NHE1             |
| TGME49_290580 | -3.90 | 6.04  | 2.54E-06 | 1.85E-05 | ATP-binding cassette G family transporter ABCG89           |
| TGME49_282040 | -3.95 | 5.99  | 2.58E-06 | 1.87E-05 | hypothetical protein                                       |
| TGME49_231215 | -8.75 | 5.41  | 2.58E-06 | 1.88E-05 | hypothetical protein                                       |
| TGME49_220110 | 2.05  | 5.05  | 2.60E-06 | 1.89E-05 | hypothetical protein                                       |
| TGME49_202630 | -1.38 | 7.37  | 2.62E-06 | 1.90E-05 | ATP-dependent metalloproteinase HflB subfamily protein     |
| TGME49_237530 | -8.75 | 5.45  | 2.62E-06 | 1.90E-05 | hypothetical protein                                       |
| TGME49_293380 | -8.83 | 5.33  | 2.64E-06 | 1.91E-05 | histone lysine acetyltransferase HAT1                      |
| TGME49_306560 | -3.30 | 5.99  | 2.65E-06 | 1.92E-05 | hypothetical protein                                       |
| TGME49_290980 | -2.32 | 6.72  | 2.74E-06 | 1.98E-05 | glycine C-acetyltransferase, putative                      |
| TGME49_269705 | 2.25  | 5.10  | 2.76E-06 | 1.99E-05 | hypothetical protein                                       |
| TGME49_316230 | -2.47 | 6.16  | 2.77E-06 | 2.00E-05 | SAC1 phosphoinositide phosphatase, putative                |
| TGME49_311100 | 1.01  | 9.23  | 2.79E-06 | 2.01E-05 | zinc finger (CCCH type) motif-containing protein           |
| TGME49_278920 | -3.20 | 5.87  | 2.81E-06 | 2.02E-05 | hypothetical protein                                       |
| TGME49_290000 | -8.91 | 4.83  | 2.82E-06 | 2.02E-05 | hypothetical protein                                       |
| TGME49_267070 | 1.24  | 7.29  | 2.84E-06 | 2.04E-05 | aquaporin 2                                                |
| TGME49_262500 | -1.65 | 7.01  | 2.86E-06 | 2.04E-05 | hypothetical protein                                       |
| TGME49_209440 | -1.70 | 7.38  | 2.86E-06 | 2.04E-05 | hypothetical protein                                       |
| TGME49_260580 | -2.15 | 6.60  | 2.86E-06 | 2.04E-05 | hypothetical protein                                       |
| TGME49_267600 | -2.73 | 6.33  | 2.86E-06 | 2.04E-05 | FHA domain-containing protein                              |
| TGME49_310860 | -2.48 | 6.37  | 2.90E-06 | 2.07E-05 | U5 snRNP-specific protein                                  |
| TGME49_211410 | -3.86 | 5.74  | 2.93E-06 | 2.09E-05 | translation initiation factor sui1 protein                 |
| TGME49_267680 | -1.27 | 7.49  | 3.03E-06 | 2.16E-05 | microneme protein MIC12                                    |
| TGME49_229380 | -8.73 | 5.38  | 3.05E-06 | 2.17E-05 | hypothetical protein                                       |
| TGME49_244230 | -8.73 | 5.32  | 3.11E-06 | 2.21E-05 | hypothetical protein                                       |
| TGME49_301380 | -3.92 | 6.01  | 3.11E-06 | 2.21E-05 | elongation factor Tu GTP binding domain-containing protein |
| TGME49_266400 | -8.79 | 5.57  | 3.12E-06 | 2.21E-05 | hypothetical protein                                       |
| TGME49_224900 | -1.32 | 7.72  | 3.15E-06 | 2.23E-05 | adenylate kinase, putative                                 |
| TGME49_255250 | -8.73 | 5.45  | 3.15E-06 | 2.23E-05 | tRNA (cytosine(34)-C(5))-methyltransferase, putative       |
| TGME49_202030 | -1.60 | 6.98  | 3.19E-06 | 2.25E-05 | hypothetical protein                                       |
| TGME49_220460 | -8.72 | 4.98  | 3.18E-06 | 2.25E-05 | SNF7 family protein                                        |
| TGME49_271790 | 1.67  | 6.36  | 3.21E-06 | 2.26E-05 | hypothetical protein                                       |
| TGME49_281910 | 1.35  | 6.18  | 3.22E-06 | 2.27E-05 | hypothetical protein                                       |
| TGME49_242790 | -1.81 | 6.69  | 3.22E-06 | 2.27E-05 | trichohyalin, putative                                     |
| TGME49_310270 | -3.99 | 5.89  | 3.22E-06 | 2.27E-05 | hypothetical protein                                       |
| TGME49_203290 | 1.89  | 8.25  | 3.25E-06 | 2.28E-05 | hypothetical protein                                       |
| TGME49_239720 | -8.71 | 5.49  | 3.26E-06 | 2.28E-05 | 50S ribosomal protein l24, putative                        |
| TGME49_249840 | -8.71 | 5.34  | 3.28E-06 | 2.30E-05 | dynein heavy chain 2, putative                             |
| TGME49_320740 | -1.72 | 7.64  | 3.30E-06 | 2.31E-05 | hypothetical protein                                       |
| TGME49_309160 | -2.28 | 6.33  | 3.32E-06 | 2.32E-05 | IgA-specific metalloendopeptidase                          |
| TGME49_310320 | -3.88 | 5.64  | 3.38E-06 | 2.36E-05 | calreticulin family protein                                |
| TGME49_299150 | -8.75 | 5.15  | 3.38E-06 | 2.36E-05 | AP2 domain transcription factor AP2III-3                   |
| TGME49_270530 | -2.87 | 5.98  | 3.42E-06 | 2.38E-05 | ubiquitin fusion degradation protein UFD1CY                |
| TGME49_230590 | -8.73 | 5.22  | 3.43E-06 | 2.39E-05 | chitobiosylidiphosphodolichol beta-mannosyltransferase     |
| TGME49_211680 | -1.71 | 11.04 | 3.45E-06 | 2.40E-05 | protein disulfide isomerase                                |
| TGME49_292330 | 1.16  | 7.38  | 3.46E-06 | 2.40E-05 | hypothetical protein                                       |
| TGME49_246970 | -8.71 | 5.55  | 3.46E-06 | 2.40E-05 | 3'-5' exonuclease domain-containing protein                |
| TGME49_297510 | -8.74 | 5.32  | 3.48E-06 | 2.41E-05 | hypothetical protein                                       |
| TGME49_210760 | -8.72 | 5.47  | 3.49E-06 | 2.41E-05 | glutamine amidotransferase-related, putative               |
| TGME49_310010 | -1.26 | 8.26  | 3.58E-06 | 2.48E-05 | rhoptry neck protein RON1                                  |

|               |       |      |          |          |                                                           |
|---------------|-------|------|----------|----------|-----------------------------------------------------------|
| TGME49_229030 | -1.68 | 6.70 | 3.76E-06 | 2.59E-05 | hypothetical protein                                      |
| TGME49_228130 | 1.68  | 6.56 | 3.77E-06 | 2.60E-05 | hypothetical protein                                      |
| TGME49_281510 | -3.11 | 6.07 | 3.77E-06 | 2.60E-05 | ribonuclease H1 large subunit, putative                   |
| TGME49_219660 | 3.10  | 5.14 | 3.81E-06 | 2.63E-05 | hypothetical protein                                      |
| TGME49_232210 | -8.74 | 5.03 | 3.85E-06 | 2.65E-05 | hypothetical protein                                      |
| TGME49_264780 | -8.72 | 5.52 | 3.87E-06 | 2.66E-05 | UTP-glucose-1-phosphate uridylyltransferase subfamily p   |
| TGME49_315700 | -3.13 | 5.81 | 3.89E-06 | 2.67E-05 | hypothetical protein                                      |
| TGME49_208730 | 1.55  | 8.92 | 3.91E-06 | 2.68E-05 | microneme protein, putative                               |
| TGME49_247550 | -1.04 | 8.65 | 3.91E-06 | 2.68E-05 | heat shock protein HSP60                                  |
| TGME49_253100 | 1.03  | 7.16 | 3.92E-06 | 2.68E-05 | hypothetical protein                                      |
| TGME49_319900 | -1.86 | 7.18 | 3.94E-06 | 2.69E-05 | hypothetical protein                                      |
| TGME49_266810 | -1.62 | 6.87 | 3.98E-06 | 2.72E-05 | hypothetical protein                                      |
| TGME49_270650 | 2.01  | 5.24 | 4.09E-06 | 2.79E-05 | deoxyribose-phosphate aldolase                            |
| TGME49_239710 | -8.73 | 5.20 | 4.11E-06 | 2.80E-05 | phosphomannomutase                                        |
| TGME49_304700 | -3.83 | 5.84 | 4.12E-06 | 2.81E-05 | hypothetical protein                                      |
| TGME49_221500 | -8.71 | 5.41 | 4.15E-06 | 2.83E-05 | dual specificity phosphatase, catalytic domain-containing |
| TGME49_215610 | -1.93 | 6.26 | 4.18E-06 | 2.84E-05 | hypothetical protein                                      |
| TGME49_246800 | -1.73 | 6.81 | 4.25E-06 | 2.89E-05 | acylaminoacyl-peptidase, putative                         |
| TGME49_211640 | 1.34  | 6.52 | 4.26E-06 | 2.89E-05 | hypothetical protein                                      |
| TGME49_312840 | -2.14 | 6.43 | 4.27E-06 | 2.89E-05 | hypothetical protein                                      |
| TGME49_208200 | -3.87 | 5.78 | 4.36E-06 | 2.95E-05 | PHD-finger domain-containing protein                      |
| TGME49_231600 | -2.49 | 6.14 | 4.41E-06 | 2.98E-05 | HEAT repeat-containing protein                            |
| TGME49_279430 | -2.75 | 6.25 | 4.41E-06 | 2.98E-05 | cwf18 pre-mRNA splicing factor protein                    |
| TGME49_264130 | 1.50  | 5.62 | 4.44E-06 | 2.99E-05 | hypothetical protein                                      |
| TGME49_316350 | -8.71 | 5.45 | 4.50E-06 | 3.04E-05 | hypothetical protein                                      |
| TGME49_267690 | -3.85 | 6.16 | 4.58E-06 | 3.09E-05 | hypothetical protein                                      |
| TGME49_270140 | -8.70 | 5.48 | 4.63E-06 | 3.11E-05 | splicing factor DIM1, putative                            |
| TGME49_263040 | -1.12 | 9.58 | 4.69E-06 | 3.15E-05 | ribosomal protein RPS16                                   |
| TGME49_283850 | -1.94 | 8.26 | 4.73E-06 | 3.17E-05 | peptidyl-prolyl cis-trans isomerase                       |
| TGME49_210682 | 3.05  | 5.90 | 4.76E-06 | 3.18E-05 | hypothetical protein                                      |
| TGME49_215070 | 1.23  | 6.64 | 4.78E-06 | 3.20E-05 | ferodoxin FD                                              |
| TGME49_213115 | -8.68 | 4.95 | 4.79E-06 | 3.21E-05 | hypothetical protein                                      |
| TGME49_297420 | -3.85 | 5.82 | 4.94E-06 | 3.29E-05 | beta-tubulin cofactor D, putative                         |
| TGME49_294020 | -8.71 | 5.25 | 5.03E-06 | 3.35E-05 | zinc finger, C3HC4 type (RING finger) domain-containing   |
| TGME49_205750 | -2.43 | 6.42 | 5.09E-06 | 3.38E-05 | histone deacetylase complex subunit Sin3                  |
| TGME49_248990 | 1.29  | 8.43 | 5.17E-06 | 3.43E-05 | hypothetical protein                                      |
| TGME49_310802 | 1.52  | 5.93 | 5.33E-06 | 3.53E-05 | CRAL/TRIO domain-containing protein                       |
| TGME49_214960 | 1.13  | 7.09 | 5.40E-06 | 3.57E-05 | AP2 domain transcription factor AP2X-8                    |
| TGME49_288010 | 2.59  | 5.10 | 5.46E-06 | 3.61E-05 | hypothetical protein                                      |
| TGME49_215060 | -1.54 | 7.25 | 5.47E-06 | 3.62E-05 | small GTP-binding protein sar1, putative                  |
| TGME49_318575 | -8.69 | 5.22 | 5.50E-06 | 3.63E-05 | hypothetical protein                                      |
| TGME49_257340 | -8.65 | 5.20 | 5.52E-06 | 3.64E-05 | Ras family protein                                        |
| TGME49_311890 | -1.36 | 7.36 | 5.53E-06 | 3.65E-05 | hypothetical protein                                      |
| TGME49_257710 | -3.82 | 5.56 | 5.56E-06 | 3.66E-05 | actin-like protein ALP 5                                  |
| TGME49_209210 | -1.97 | 6.84 | 5.60E-06 | 3.68E-05 | hypothetical protein                                      |
| TGME49_217740 | -1.92 | 6.97 | 5.74E-06 | 3.77E-05 | 3-ketoacyl-(acyl-carrier-protein) reductase               |
| TGME49_205540 | -8.65 | 5.64 | 5.79E-06 | 3.80E-05 | DEAD/DEAH box helicase domain-containing protein          |
| TGME49_314280 | 2.47  | 5.65 | 5.85E-06 | 3.84E-05 | AAR2 protein                                              |
| TGME49_310100 | -8.67 | 5.39 | 5.86E-06 | 3.84E-05 | mannosyltransferase (pig-m) protein                       |
| TGME49_254160 | -3.79 | 4.76 | 5.89E-06 | 3.86E-05 | hypothetical protein                                      |
| TGME49_233410 | 1.48  | 5.64 | 5.89E-06 | 3.86E-05 | Sof1 family domain-containing protein                     |
| TGME49_228980 | -8.67 | 5.06 | 6.03E-06 | 3.94E-05 | hypothetical protein                                      |
| TGME49_228200 | 1.16  | 7.28 | 6.05E-06 | 3.95E-05 | vacuolar (h+)-atpase g subunit protein                    |
| TGME49_249740 | 1.51  | 6.54 | 6.06E-06 | 3.95E-05 | translation machinery associated tma7 protein             |
| TGME49_262120 | -1.51 | 7.00 | 6.10E-06 | 3.97E-05 | IQ calmodulin-binding motif domain-containing protein     |
| TGME49_215260 | -1.52 | 7.22 | 6.11E-06 | 3.98E-05 | carbamoylphosphate synthetase                             |
| TGME49_274130 | -8.63 | 5.27 | 6.15E-06 | 4.00E-05 | TBC domain-containing protein                             |

|               |       |      |          |          |                                                        |
|---------------|-------|------|----------|----------|--------------------------------------------------------|
| TGME49_224580 | -1.95 | 6.71 | 6.17E-06 | 4.01E-05 | RNA recognition motif-containing protein               |
| TGME49_271930 | -1.52 | 8.59 | 6.21E-06 | 4.03E-05 | hypothetical protein                                   |
| TGME49_289670 | 2.35  | 4.94 | 6.22E-06 | 4.03E-05 | DNA repair metallo-beta-lactamase                      |
| TGME49_275980 | -3.79 | 5.59 | 6.24E-06 | 4.04E-05 | coenzyme q (ubiquinone) biosynthesis protein coq4 prot |
| TGME49_318210 | -8.65 | 5.53 | 6.24E-06 | 4.04E-05 | hypothetical protein                                   |
| TGME49_209070 | 1.56  | 7.33 | 6.28E-06 | 4.06E-05 | hypothetical protein                                   |
| TGME49_245710 | -1.51 | 6.93 | 6.39E-06 | 4.13E-05 | phosphatidylinositol-4-phosphate 5-kinase, putative    |
| TGME49_262980 | -8.65 | 5.23 | 6.42E-06 | 4.14E-05 | hypothetical protein                                   |
| TGME49_232360 | -1.82 | 6.79 | 6.46E-06 | 4.17E-05 | exonuclease                                            |
| TGME49_233500 | 1.23  | 8.04 | 6.59E-06 | 4.24E-05 | triose-phosphate isomerase TPI-II                      |
| TGME49_318170 | 1.50  | 6.11 | 6.65E-06 | 4.28E-05 | hypothetical protein                                   |
| TGME49_220175 | 2.87  | 4.77 | 6.66E-06 | 4.28E-05 | hypothetical protein                                   |
| TGME49_323110 | 1.42  | 6.09 | 6.67E-06 | 4.28E-05 | hypothetical protein                                   |
| TGME49_258480 | -1.89 | 6.81 | 6.88E-06 | 4.41E-05 | hypothetical protein                                   |
| TGME49_249820 | -3.04 | 5.81 | 6.92E-06 | 4.43E-05 | ATP-binding cassette sub-family B member 5             |
| TGME49_306310 | -2.25 | 6.64 | 6.96E-06 | 4.45E-05 | RecF/RecN/SMC N terminal domain-containing protein     |
| TGME49_204400 | -1.50 | 8.95 | 7.09E-06 | 4.52E-05 | ATPase synthase subunit alpha, putative                |
| TGME49_279540 | -8.72 | 4.99 | 7.11E-06 | 4.54E-05 | hypothetical protein                                   |
| TGME49_313690 | -1.69 | 6.61 | 7.19E-06 | 4.58E-05 | Sel1 repeat-containing protein                         |
| TGME49_297230 | -2.06 | 6.39 | 7.23E-06 | 4.60E-05 | Vps53 family, N-terminal protein                       |
| TGME49_311250 | -3.17 | 6.06 | 7.24E-06 | 4.61E-05 | hypothetical protein                                   |
| TGME49_284780 | -1.33 | 7.47 | 7.27E-06 | 4.62E-05 | hypothetical protein                                   |
| TGME49_216680 | -2.46 | 7.27 | 7.60E-06 | 4.82E-05 | ankyrin repeat-containing protein                      |
| TGME49_281570 | -3.77 | 5.67 | 7.60E-06 | 4.82E-05 | hypothetical protein                                   |
| TGME49_265220 | -3.83 | 5.88 | 7.67E-06 | 4.87E-05 | co-chaperone GrpE protein                              |
| TGME49_273370 | -2.82 | 6.35 | 7.76E-06 | 4.92E-05 | coatomer gamma 2-subunit protein, putative             |
| TGME49_275310 | -3.07 | 5.96 | 7.84E-06 | 4.96E-05 | hypothetical protein                                   |
| TGME49_215430 | 1.72  | 7.91 | 7.86E-06 | 4.97E-05 | hypothetical protein                                   |
| TGME49_262060 | -3.03 | 5.97 | 7.99E-06 | 5.05E-05 | hypothetical protein                                   |
| TGME49_263610 | -1.78 | 6.91 | 8.01E-06 | 5.05E-05 | hypothetical protein                                   |
| TGME49_261600 | 1.08  | 7.25 | 8.05E-06 | 5.08E-05 | creatinase domain-containing protein                   |
| TGME49_310850 | -8.68 | 5.31 | 8.08E-06 | 5.09E-05 | MYND finger domain-containing protein                  |
| TGME49_251440 | -8.69 | 5.79 | 8.11E-06 | 5.10E-05 | troponin c, isotype gamma, putative                    |
| TGME49_221690 | -3.80 | 5.62 | 8.17E-06 | 5.13E-05 | hypothetical protein                                   |
| TGME49_289510 | 1.58  | 5.65 | 8.22E-06 | 5.16E-05 | hypothetical protein                                   |
| TGME49_233820 | -8.59 | 4.93 | 8.26E-06 | 5.18E-05 | DNA polymerase epsilon subunit B protein               |
| TGME49_260620 | 1.54  | 8.06 | 8.33E-06 | 5.22E-05 | hypothetical protein                                   |
| TGME49_286800 | -8.64 | 5.19 | 8.63E-06 | 5.40E-05 | hypothetical protein                                   |
| TGME49_229500 | -3.75 | 5.70 | 8.65E-06 | 5.41E-05 | hypothetical protein                                   |
| TGME49_262950 | 1.05  | 7.72 | 8.94E-06 | 5.58E-05 | hypothetical protein                                   |
| TGME49_278660 | -1.24 | 8.03 | 8.99E-06 | 5.60E-05 | P-type ATPase4, putative                               |
| TGME49_218955 | 1.82  | 5.19 | 9.07E-06 | 5.65E-05 | hypothetical protein                                   |
| TGME49_253160 | 1.30  | 6.54 | 9.08E-06 | 5.65E-05 | hypothetical protein                                   |
| TGME49_228490 | -2.64 | 6.14 | 9.10E-06 | 5.65E-05 | hypothetical protein                                   |
| TGME49_290940 | -1.48 | 7.21 | 9.46E-06 | 5.87E-05 | EMP/nonaspanin domain family protein                   |
| TGME49_313270 | -1.44 | 7.49 | 9.58E-06 | 5.94E-05 | hypothetical protein                                   |
| TGME49_225910 | 1.48  | 5.95 | 9.64E-06 | 5.97E-05 | hypothetical protein                                   |
| TGME49_261710 | -1.75 | 6.65 | 9.65E-06 | 5.98E-05 | ankyrin repeat-containing protein                      |
| TGME49_238410 | -3.02 | 5.77 | 9.81E-06 | 6.07E-05 | hypothetical protein                                   |
| TGME49_225800 | -3.04 | 6.11 | 1.00E-05 | 6.18E-05 | iron-sulfur assembly ATPase                            |
| TGME49_237890 | -3.76 | 6.17 | 1.01E-05 | 6.23E-05 | calcium-dependent protein kinase CDPK4                 |
| TGME49_220870 | 1.59  | 5.64 | 1.02E-05 | 6.25E-05 | hypothetical protein                                   |
| TGME49_264960 | -8.59 | 5.17 | 1.02E-05 | 6.26E-05 | hypothetical protein                                   |
| TGME49_232960 | -1.86 | 6.61 | 1.03E-05 | 6.34E-05 | oxidoreductase, 2OG-Fe(II) oxygenase family protein    |
| TGME49_223510 | -8.57 | 5.27 | 1.04E-05 | 6.41E-05 | hypothetical protein                                   |
| TGME49_270230 | -8.58 | 5.30 | 1.05E-05 | 6.41E-05 | hypothetical protein                                   |
| TGME49_212960 | -8.61 | 5.30 | 1.05E-05 | 6.42E-05 | hypothetical protein                                   |

|               |       |      |          |          |                                                      |
|---------------|-------|------|----------|----------|------------------------------------------------------|
| TGME49_291010 | 2.29  | 5.14 | 1.08E-05 | 6.62E-05 | hypothetical protein                                 |
| TGME49_294740 | -2.06 | 6.49 | 1.09E-05 | 6.65E-05 | hypothetical protein                                 |
| TGME49_295420 | 1.39  | 7.87 | 1.10E-05 | 6.71E-05 | hypothetical protein                                 |
| TGME49_209820 | -8.59 | 5.29 | 1.10E-05 | 6.72E-05 | syntaxin protein                                     |
| TGME49_288710 | 1.81  | 5.08 | 1.11E-05 | 6.75E-05 | hypothetical protein                                 |
| TGME49_201900 | -3.75 | 5.71 | 1.11E-05 | 6.75E-05 | hypothetical protein                                 |
| TGME49_268220 | 6.66  | 5.12 | 1.11E-05 | 6.77E-05 | hypothetical protein                                 |
| TGME49_310810 | -2.03 | 6.36 | 1.13E-05 | 6.86E-05 | apyrase                                              |
| TGME49_227600 | -1.37 | 9.30 | 1.13E-05 | 6.87E-05 | ribosomal protein RPL34                              |
| TGME49_213880 | 2.68  | 4.99 | 1.14E-05 | 6.90E-05 | hypothetical protein                                 |
| TGME49_273815 | -8.62 | 5.51 | 1.14E-05 | 6.90E-05 | hypothetical protein                                 |
| TGME49_238230 | -3.04 | 5.73 | 1.15E-05 | 6.95E-05 | Ser/Thr phosphatase family protein                   |
| TGME49_321590 | -1.41 | 7.17 | 1.16E-05 | 7.01E-05 | hypothetical protein                                 |
| TGME49_226270 | -3.07 | 5.82 | 1.17E-05 | 7.07E-05 | hypothetical protein                                 |
| TGME49_310710 | -3.72 | 5.64 | 1.18E-05 | 7.13E-05 | small ribosomal subunit Rsm22 protein                |
| TGME49_277010 | -8.62 | 4.90 | 1.18E-05 | 7.14E-05 | Fe-S metabolism associated domain-containing protein |
| TGME49_201870 | -2.21 | 6.58 | 1.18E-05 | 7.14E-05 | tetratricopeptide repeat-containing protein          |
| TGME49_249310 | -3.77 | 5.20 | 1.19E-05 | 7.18E-05 | hypothetical protein                                 |
| TGME49_204080 | -1.68 | 6.87 | 1.20E-05 | 7.19E-05 | histidine acid phosphatase superfamily protein       |
| TGME49_225990 | -2.62 | 6.32 | 1.20E-05 | 7.19E-05 | acyl transferase domain-containing protein           |
| TGME49_251670 | -3.72 | 5.58 | 1.20E-05 | 7.19E-05 | werner helicase interacting protein 1, putative      |
| TGME49_274150 | -3.79 | 5.45 | 1.20E-05 | 7.19E-05 | hypothetical protein                                 |
| TGME49_232320 | -8.59 | 4.97 | 1.20E-05 | 7.19E-05 | hypothetical protein                                 |
| TGME49_253640 | 1.08  | 6.73 | 1.20E-05 | 7.20E-05 | hypothetical protein                                 |
| TGME49_213240 | -8.59 | 5.32 | 1.23E-05 | 7.40E-05 | hypothetical protein                                 |
| TGME49_236210 | -1.08 | 8.23 | 1.24E-05 | 7.42E-05 | peptidase M16 family poetin, putative                |
| TGME49_251410 | -1.96 | 6.67 | 1.24E-05 | 7.44E-05 | tetratricopeptide repeat-containing protein          |
| TGME49_235150 | -1.01 | 8.45 | 1.25E-05 | 7.46E-05 | transporter, major facilitator family protein        |
| TGME49_215570 | -3.01 | 6.18 | 1.25E-05 | 7.46E-05 | AP2 domain transcription factor AP2X-11              |
| TGME49_283830 | 2.46  | 5.33 | 1.26E-05 | 7.49E-05 | type I inorganic pyrophosphatase PPase               |
| TGME49_216120 | -2.18 | 6.42 | 1.26E-05 | 7.49E-05 | hypothetical protein                                 |
| TGME49_263150 | -8.57 | 4.96 | 1.26E-05 | 7.51E-05 | tetratricopeptide repeat-containing protein          |
| TGME49_306520 | 1.58  | 7.15 | 1.27E-05 | 7.57E-05 | tRNA pseudouridine synthase B, putative              |
| TGME49_214770 | -1.16 | 7.90 | 1.27E-05 | 7.57E-05 | small GTP binding protein rab1a, putative            |
| TGME49_290340 | -2.42 | 6.17 | 1.27E-05 | 7.57E-05 | HEAT repeat-containing protein                       |
| TGME49_221170 | -1.40 | 6.99 | 1.28E-05 | 7.60E-05 | CAAX metallo endopeptidase                           |
| TGME49_269930 | 2.31  | 6.51 | 1.29E-05 | 7.66E-05 | calcium binding egf domain-containing protein        |
| TGME49_264730 | -8.53 | 5.36 | 1.29E-05 | 7.66E-05 | hypothetical protein                                 |
| TGME49_246570 | 1.56  | 5.60 | 1.30E-05 | 7.68E-05 | hypothetical protein                                 |
| TGME49_310490 | -1.20 | 9.63 | 1.30E-05 | 7.68E-05 | ribosomal protein RPL27A                             |
| TGME49_252490 | -2.36 | 5.95 | 1.30E-05 | 7.68E-05 | vacuolar protein sorting 29, putative                |
| TGME49_257960 | -3.03 | 5.69 | 1.30E-05 | 7.68E-05 | GDP-D-mannose pyrophosphorylase                      |
| TGME49_215040 | -2.05 | 6.64 | 1.32E-05 | 7.79E-05 | HEAT repeat-containing protein                       |
| TGME49_230050 | 1.85  | 4.96 | 1.33E-05 | 7.83E-05 | 50S ribosomal protein L3, putative                   |
| TGME49_310560 | -3.74 | 5.55 | 1.34E-05 | 7.88E-05 | hypothetical protein                                 |
| TGME49_272475 | -8.57 | 5.24 | 1.34E-05 | 7.88E-05 | protein kinase domain-containing protein             |
| TGME49_294830 | -2.72 | 6.45 | 1.37E-05 | 8.03E-05 | methyltransferase domain-containing protein          |
| TGME49_307040 | -1.59 | 6.89 | 1.38E-05 | 8.09E-05 | shikimate dehydrogenase substrate binding domain-con |
| TGME49_248790 | 1.96  | 5.02 | 1.38E-05 | 8.09E-05 | hypothetical protein                                 |
| TGME49_296340 | 3.29  | 5.35 | 1.39E-05 | 8.12E-05 | hypothetical protein                                 |
| TGME49_270720 | -8.70 | 5.34 | 1.39E-05 | 8.13E-05 | hypothetical protein                                 |
| TGME49_210390 | -8.60 | 5.21 | 1.40E-05 | 8.20E-05 | WD domain, G-beta repeat-containing protein          |
| TGME49_253410 | 2.32  | 6.01 | 1.40E-05 | 8.20E-05 | hypothetical protein                                 |
| TGME49_221460 | -1.54 | 6.68 | 1.41E-05 | 8.22E-05 | phosphoglycerate mutase family protein               |
| TGME49_266970 | -3.02 | 5.89 | 1.42E-05 | 8.30E-05 | hypothetical protein                                 |
| TGME49_253490 | 2.08  | 7.37 | 1.43E-05 | 8.32E-05 | hypothetical protein                                 |
| TGME49_284660 | -8.53 | 5.27 | 1.44E-05 | 8.38E-05 | mitochondrial ribosomal protein s6-2, putative       |



|               |       |       |          |             |                                                         |
|---------------|-------|-------|----------|-------------|---------------------------------------------------------|
| TGME49_223800 | -3.73 | 5.96  | 1.47E-05 | 8.52E-05    | hypothetical protein                                    |
| TGME49_246060 | -8.64 | 5.11  | 1.47E-05 | 8.52E-05    | DNA-dependent RNA polymerase                            |
| TGME49_285780 | -8.59 | 5.31  | 1.48E-05 | 8.56E-05    | hypothetical protein                                    |
| TGME49_304710 | -1.16 | 7.77  | 1.48E-05 | 8.57E-05    | eukaryotic peptide chain release factor, putative       |
| TGME49_221260 | 1.36  | 6.11  | 1.48E-05 | 8.59E-05    | Class-II DAHP synthetase family protein                 |
| TGME49_248570 | -3.77 | 5.72  | 1.49E-05 | 8.65E-05    | hypothetical protein                                    |
| TGME49_203180 | -3.69 | 5.86  | 1.51E-05 | 8.75E-05    | leucine rich repeat-containing protein                  |
| TGME49_288260 | -1.70 | 6.74  | 1.52E-05 | 8.78E-05    | hypothetical protein                                    |
| TGME49_283800 | -2.23 | 6.25  | 1.53E-05 | 8.85E-05    | hypothetical protein                                    |
| TGME49_288560 | -1.87 | 6.49  | 1.55E-05 | 8.92E-05    | hypothetical protein                                    |
| TGME49_228030 | 2.04  | 4.77  | 1.57E-05 | 9.01E-05    | hypothetical protein                                    |
| TGME49_247240 | -1.96 | 6.78  | 1.57E-05 | 9.02E-05    | ubiquitin carboxyl-terminal hydrolase, family 1 protein |
| TGME49_234670 | 1.81  | 5.29  | 1.57E-05 | 9.03E-05    | actin-like family protein                               |
| TGME49_283540 | 1.14  | 8.26  | 1.57E-05 | 9.04E-05    | hypothetical protein                                    |
| TGME49_217750 | -3.69 | 5.56  | 1.60E-05 | 9.18E-05    | hypothetical protein                                    |
| TGME49_313240 | -3.07 | 5.84  | 1.60E-05 | 9.18E-05    | ethylene-responsive RNA helicase, putative              |
| TGME49_224230 | 1.97  | 5.03  | 1.61E-05 | 9.19E-05    | AP2 domain transcription factor AP2X-3                  |
| TGME49_268600 | -2.96 | 5.84  | 1.63E-05 | 9.33E-05    | DNA polymerase epsilon subunit B protein                |
| TGME49_254910 | -2.61 | 6.12  | 1.66E-05 | 9.45E-05    | hypothetical protein                                    |
| TGME49_208050 | -2.66 | 5.98  | 1.67E-05 | 9.55E-05    | ABC transporter, putative                               |
| TGME49_233090 | -8.51 | 4.99  | 1.68E-05 | 9.56E-05    | XPG N-terminal domain-containing protein                |
| TGME49_266900 | 1.49  | 7.86  | 1.69E-05 | 9.60E-05    | cyclin, N-terminal domain-containing protein            |
| TGME49_203450 | -2.19 | 6.40  | 1.69E-05 | 9.60E-05    | DUF3228 domain-containing protein                       |
| TGME49_244000 | -8.53 | 5.35  | 1.69E-05 | 9.61E-05    | DEAD/DEAH box helicase domain-containing protein        |
| TGME49_270150 | -2.98 | 5.78  | 1.70E-05 | 9.62E-05    | hypothetical protein                                    |
| TGME49_315690 | -3.70 | 5.51  | 1.70E-05 | 9.62E-05    | DnaJ domain-containing protein                          |
| TGME49_312860 | -3.01 | 5.92  | 1.71E-05 | 9.68E-05    | hypothetical protein                                    |
| TGME49_305330 | -1.02 | 9.74  | 1.74E-05 | 9.83E-05    | cyclin, N-terminal domain-containing protein            |
| TGME49_271060 | -3.68 | 5.87  | 1.75E-05 | 9.89E-05    | Sec1 family protein                                     |
| TGME49_321440 | -1.18 | 7.84  | 1.77E-05 | 9.99E-05    | SWI2/SNF2 ISWI-like SANT                                |
| TGME49_253510 | 2.46  | 6.34  | 1.79E-05 | 0.000100768 | transporter/permease protein                            |
| TGME49_299780 | 1.14  | 9.06  | 1.81E-05 | 0.000102175 | hypothetical protein                                    |
| TGME49_314460 | -8.49 | 4.78  | 1.82E-05 | 0.000102317 | hypothetical protein                                    |
| TGME49_305850 | -1.10 | 7.71  | 1.82E-05 | 0.000102448 | RNA recognition motif-containing protein                |
| TGME49_294390 | -8.48 | 5.02  | 1.83E-05 | 0.000102894 | myosin light chain MLC4, putative                       |
| TGME49_222370 | 1.49  | 7.08  | 1.84E-05 | 0.000103592 | SAG-related sequence SRS13                              |
| TGME49_261570 | -1.13 | 10.08 | 1.85E-05 | 0.000103706 | ribosomal protein RPL7A                                 |
| TGME49_273850 | -2.95 | 5.77  | 1.86E-05 | 0.000104033 | hypothetical protein                                    |
| TGME49_310380 | -8.50 | 5.10  | 1.86E-05 | 0.000104033 | brix domain containing protein                          |
| TGME49_216530 | -8.54 | 4.90  | 1.86E-05 | 0.000104226 | ribosome recycling factor protein                       |
| TGME49_203830 | -2.97 | 6.38  | 1.86E-05 | 0.000104245 | FHA domain-containing protein                           |
| TGME49_285990 | -3.77 | 5.64  | 1.86E-05 | 0.000104284 | Filamin/ABP280 repeat-containing protein                |
| TGME49_209030 | -1.03 | 11.56 | 1.88E-05 | 0.000104814 | actin ACT1                                              |
| TGME49_300260 | -1.11 | 8.27  | 1.88E-05 | 0.000104814 | threonyl-tRNA synthetase family protein                 |
| TGME49_221585 | -8.53 | 5.10  | 1.90E-05 | 0.000106202 | hypothetical protein                                    |
| TGME49_226072 | -1.13 | 7.64  | 1.92E-05 | 0.000107183 | Ser/Thr phosphatase family protein                      |
| TGME49_312280 | -1.54 | 6.89  | 1.92E-05 | 0.000107183 | pre-mRNA-splicing factor ATP-dependent RNA helicase,    |
| TGME49_283810 | -3.72 | 5.42  | 1.93E-05 | 0.000107198 | hypothetical protein                                    |
| TGME49_312530 | 1.08  | 6.83  | 1.93E-05 | 0.000107401 | splicing factor, CC1 family protein                     |
| TGME49_205160 | 1.90  | 5.28  | 1.93E-05 | 0.000107449 | hypothetical protein                                    |
| TGME49_221440 | -8.53 | 5.45  | 1.93E-05 | 0.000107449 | RPGR, putative                                          |
| TGME49_295040 | -1.24 | 7.94  | 1.95E-05 | 0.000108114 | HEAT repeat-containing protein                          |
| TGME49_253180 | 1.95  | 7.48  | 1.95E-05 | 0.000108185 | hypothetical protein                                    |
| TGME49_309800 | -1.60 | 6.85  | 1.95E-05 | 0.000108185 | RNA recognition motif-containing protein                |
| TGME49_224935 | 1.43  | 6.20  | 1.96E-05 | 0.000108278 | hypothetical protein                                    |
| TGME49_233680 | -8.47 | 5.02  | 1.96E-05 | 0.000108278 | nuclear movement family protein                         |
| TGME49_218250 | -2.35 | 6.10  | 1.96E-05 | 0.000108474 | TAP42 family protein                                    |

|               |       |      |          |             |                                                                  |
|---------------|-------|------|----------|-------------|------------------------------------------------------------------|
| TGME49_226560 | -3.67 | 5.49 | 1.97E-05 | 0.000108814 | zinc finger (CCCH type) motif-containing protein                 |
| TGME49_247700 | 1.32  | 8.30 | 1.97E-05 | 0.000108939 | AP2 domain transcription factor AP2XII-4                         |
| TGME49_301130 | -8.47 | 5.01 | 1.97E-05 | 0.000108939 | hypothetical protein                                             |
| TGME49_297890 | 1.19  | 6.67 | 1.98E-05 | 0.000109207 | hypothetical protein                                             |
| TGME49_284540 | -1.31 | 7.47 | 1.99E-05 | 0.000109645 | ATP synthase F1, delta subunit protein                           |
| TGME49_269390 | 1.20  | 6.73 | 2.00E-05 | 0.000109902 | CRAL/TRIO domain-containing protein                              |
| TGME49_272770 | -3.67 | 5.80 | 2.00E-05 | 0.000110075 | hypothetical protein                                             |
| TGME49_318260 | -3.67 | 5.56 | 2.02E-05 | 0.000110815 | transcription initiation factor TFIID subunit TAF5               |
| TGME49_213370 | 1.33  | 6.46 | 2.02E-05 | 0.000110945 | formin FRM3                                                      |
| TGME49_286750 | -1.34 | 7.53 | 2.04E-05 | 0.000112    | MA3 domain-containing protein                                    |
| TGME49_312210 | -2.95 | 5.52 | 2.04E-05 | 0.000112074 | hypothetical protein                                             |
| TGME49_306290 | -2.04 | 6.40 | 2.06E-05 | 0.000112971 | DNA-directed RNA polymerase III RPC1                             |
| TGME49_311470 | -1.07 | 9.92 | 2.08E-05 | 0.000113753 | rhoptry neck protein RON5                                        |
| TGME49_223668 | 1.96  | 5.19 | 2.08E-05 | 0.000113872 | LYAR-type C2HC zinc finger protein                               |
| TGME49_219310 | -1.31 | 8.62 | 2.11E-05 | 0.000115315 | DnaK family protein                                              |
| TGME49_314890 | -3.65 | 5.41 | 2.11E-05 | 0.00011534  | ThiF family protein                                              |
| TGME49_228230 | 1.30  | 9.12 | 2.14E-05 | 0.000116509 | hypothetical protein                                             |
| TGME49_223780 | -1.76 | 6.75 | 2.15E-05 | 0.000117035 | hypothetical protein                                             |
| TGME49_249460 | -8.46 | 5.36 | 2.17E-05 | 0.000118139 | WD domain, G-beta repeat-containing protein                      |
| TGME49_280720 | -8.46 | 5.01 | 2.17E-05 | 0.000118303 | hypothetical protein                                             |
| TGME49_309950 | -8.45 | 5.31 | 2.18E-05 | 0.000118429 | NLE (NUC135) domain-containing protein                           |
| TGME49_240890 | -1.27 | 7.45 | 2.18E-05 | 0.000118434 | 6-phosphofructokinase                                            |
| TGME49_299900 | -8.45 | 5.26 | 2.19E-05 | 0.000118755 | hypothetical protein                                             |
| TGME49_312340 | -8.46 | 5.02 | 2.20E-05 | 0.000119496 | hypothetical protein                                             |
| TGME49_243290 | -2.13 | 6.21 | 2.20E-05 | 0.000119578 | hypothetical protein                                             |
| TGME49_219770 | -8.54 | 5.44 | 2.21E-05 | 0.000119619 | 30S ribosomal protein S12, putative                              |
| TGME49_297460 | -8.51 | 5.02 | 2.23E-05 | 0.000120667 | hypothetical protein                                             |
| TGME49_294250 | -2.11 | 6.17 | 2.26E-05 | 0.000122221 | WD domain, G-beta repeat-containing protein                      |
| TGME49_249560 | -8.49 | 5.35 | 2.26E-05 | 0.000122376 | DNA-directed RNA polymerase alpha chain rpoA                     |
| TGME49_288900 | 1.82  | 5.12 | 2.27E-05 | 0.00012258  | Yos1 family protein                                              |
| TGME49_270900 | -3.05 | 6.04 | 2.27E-05 | 0.00012258  | ATPase, AAA family protein                                       |
| TGME49_210778 | -1.97 | 6.36 | 2.28E-05 | 0.000123295 | hemimethylated DNA binding domain-containing protein             |
| TGME49_229350 | -1.98 | 6.02 | 2.29E-05 | 0.000123378 | HEAT repeat-containing protein                                   |
| TGME49_264040 | -1.19 | 7.86 | 2.31E-05 | 0.000124258 | hypothetical protein                                             |
| TGME49_254410 | 1.12  | 6.78 | 2.31E-05 | 0.000124575 | protein phosphatase 2C, putative                                 |
| TGME49_216240 | -1.96 | 6.30 | 2.33E-05 | 0.000125462 | hypothetical protein                                             |
| TGME49_258680 | -2.11 | 6.21 | 2.35E-05 | 0.000126361 | TATA-box binding protein TBP2                                    |
| TGME49_228730 | -8.45 | 5.41 | 2.37E-05 | 0.000127174 | hypothetical protein                                             |
| TGME49_216410 | -8.55 | 5.36 | 2.45E-05 | 0.000131168 | hypothetical protein                                             |
| TGME49_311680 | -1.45 | 7.31 | 2.45E-05 | 0.000131414 | FUN14 family protein                                             |
| TGME49_230860 | -2.33 | 6.09 | 2.45E-05 | 0.000131414 | hypothetical protein                                             |
| TGME49_289680 | -1.06 | 7.66 | 2.50E-05 | 0.000133692 | Ras-related protein Rab11                                        |
| TGME49_308880 | -8.45 | 5.26 | 2.53E-05 | 0.000135149 | ImpB/MucB/SamB family protein                                    |
| TGME49_246230 | -8.49 | 5.20 | 2.53E-05 | 0.000135149 | hypothetical protein                                             |
| TGME49_261000 | -1.53 | 7.03 | 2.55E-05 | 0.000135991 | MutS domain V domain-containing protein                          |
| TGME49_297900 | 1.37  | 7.58 | 2.56E-05 | 0.000136164 | hypothetical protein                                             |
| TGME49_236800 | -8.45 | 5.06 | 2.56E-05 | 0.000136164 | hypothetical protein                                             |
| TGME49_269150 | -8.45 | 5.14 | 2.56E-05 | 0.000136164 | DHHC zinc finger domain-containing protein                       |
| TGME49_213400 | -2.32 | 6.41 | 2.61E-05 | 0.000138596 | zinc finger (CCCH type) motif-containing protein                 |
| TGME49_259950 | 2.05  | 7.95 | 2.62E-05 | 0.000139061 | carbonate dehydratase, eukaryotic-type domain-containing protein |
| TGME49_314070 | 1.30  | 6.32 | 2.63E-05 | 0.000139548 | hypothetical protein                                             |
| TGME49_273920 | -2.55 | 6.00 | 2.64E-05 | 0.000139904 | aldose reductase, putative                                       |
| TGME49_201150 | -1.77 | 6.72 | 2.65E-05 | 0.000140261 | heavy metal translocating P-type ATPase subfamily protein        |
| TGME49_203720 | 1.89  | 8.00 | 2.68E-05 | 0.000141981 | vitamin k epoxide reductase family protein                       |
| TGME49_297140 | -2.91 | 5.78 | 2.70E-05 | 0.000142776 | U6 snRNA-associated sm family protein Lsm2, putative             |
| TGME49_264860 | -3.63 | 5.69 | 2.71E-05 | 0.000143204 | zinc finger, C3HC4 type (RING finger) domain-containing protein  |
| TGME49_305030 | -2.10 | 5.98 | 2.71E-05 | 0.000143236 | kinase, pfkB family protein                                      |

|               |       |      |          |             |                                                            |
|---------------|-------|------|----------|-------------|------------------------------------------------------------|
| TGME49_254380 | -8.45 | 5.12 | 2.72E-05 | 0.000143611 | ribosomal protein L11, putative                            |
| TGME49_305920 | -3.62 | 5.44 | 2.73E-05 | 0.000143825 | endonuclease III family 1 protein                          |
| TGME49_211340 | 1.29  | 6.69 | 2.75E-05 | 0.00014474  | hypothetical protein                                       |
| TGME49_316200 | 1.12  | 6.43 | 2.76E-05 | 0.000145164 | phosphoglycerate mutase family protein                     |
| TGME49_268880 | -2.91 | 6.09 | 2.78E-05 | 0.000146036 | hypothetical protein                                       |
| TGME49_321410 | 1.14  | 7.54 | 2.78E-05 | 0.000146042 | hypothetical protein                                       |
| TGME49_236860 | -3.69 | 6.13 | 2.80E-05 | 0.000146746 | haloacid dehalogenase family hydrolase domain-contain      |
| TGME49_264720 | -3.61 | 5.63 | 2.82E-05 | 0.000147917 | hypothetical protein                                       |
| TGME49_293330 | -8.42 | 5.03 | 2.89E-05 | 0.00015113  | hypothetical protein                                       |
| TGME49_256000 | -1.01 | 8.30 | 2.90E-05 | 0.000151757 | endoplasmic reticulum retention receptor                   |
| TGME49_235750 | -8.43 | 5.02 | 2.90E-05 | 0.000151779 | ULK kinase                                                 |
| TGME49_320750 | 1.40  | 5.85 | 2.93E-05 | 0.000152887 | hypothetical protein                                       |
| TGME49_248630 | -1.79 | 6.51 | 2.94E-05 | 0.000153578 | actin-related protein ARP1                                 |
| TGME49_234390 | -8.45 | 5.43 | 2.95E-05 | 0.000153578 | hypothetical protein                                       |
| TGME49_299200 | 1.21  | 7.09 | 2.98E-05 | 0.000155052 | Bet3 transport protein, putative                           |
| TGME49_251885 | -8.45 | 5.07 | 2.99E-05 | 0.000155555 | hypothetical protein                                       |
| TGME49_253615 | 1.20  | 6.39 | 3.01E-05 | 0.000156492 | hypothetical protein                                       |
| TGME49_288930 | -2.33 | 6.16 | 3.04E-05 | 0.000158209 | hypothetical protein                                       |
| TGME49_300285 | -8.56 | 5.23 | 3.09E-05 | 0.000160662 | hypothetical protein                                       |
| TGME49_232020 | -1.92 | 6.60 | 3.14E-05 | 0.000162595 | hypothetical protein                                       |
| TGME49_224110 | -1.33 | 6.80 | 3.17E-05 | 0.000164218 | adhesion regulating molecule region protein, putative      |
| TGME49_226280 | 1.85  | 5.02 | 3.19E-05 | 0.000165158 | ribosomal protein L28, putative                            |
| TGME49_226590 | 1.17  | 9.66 | 3.21E-05 | 0.000166111 | cytochrome C oxidase subunit IIa, putative                 |
| TGME49_263210 | -8.42 | 5.06 | 3.26E-05 | 0.000168644 | ubiquitin interaction motif domain-containing protein      |
| TGME49_285210 | -8.47 | 5.26 | 3.29E-05 | 0.000169622 | hypothetical protein                                       |
| TGME49_228630 | -1.36 | 7.14 | 3.30E-05 | 0.00017007  | hypothetical protein                                       |
| TGME49_291090 | -8.45 | 5.22 | 3.30E-05 | 0.00017007  | SWI2/SNF2-containing protein                               |
| TGME49_319570 | -1.90 | 6.69 | 3.31E-05 | 0.000170313 | WD domain, G-beta repeat-containing protein                |
| TGME49_291030 | -3.67 | 5.60 | 3.41E-05 | 0.000175387 | zinc finger, C3HC4 type (RING finger) domain-containing    |
| TGME49_308940 | -8.39 | 4.89 | 3.42E-05 | 0.00017559  | hypothetical protein                                       |
| TGME49_308093 | 1.13  | 7.72 | 3.48E-05 | 0.000178693 | rhoptry kinase family protein (incomplete catalytic triad) |
| TGME49_259850 | -8.38 | 5.08 | 3.50E-05 | 0.000179573 | hypothetical protein                                       |
| TGME49_240910 | -1.84 | 6.32 | 3.51E-05 | 0.00017989  | hypothetical protein                                       |
| TGME49_239130 | 1.43  | 5.73 | 3.56E-05 | 0.000182233 | Tyrosine kinase-like (TKL) protein                         |
| TGME49_209860 | -8.38 | 5.15 | 3.57E-05 | 0.000182766 | SRP40, C-terminal domain-containing protein                |
| TGME49_206600 | -8.37 | 5.40 | 3.60E-05 | 0.000183821 | sigma-70, region 3 protein                                 |
| TGME49_207180 | -8.43 | 5.29 | 3.64E-05 | 0.000185678 | indole-3-glycerol phosphate synthase domain-containing     |
| TGME49_227115 | -8.38 | 5.08 | 3.65E-05 | 0.000186322 | hypothetical protein                                       |
| TGME49_308580 | -2.51 | 5.95 | 3.69E-05 | 0.000188101 | Lon protease family protein                                |
| TGME49_259210 | -8.38 | 5.17 | 3.73E-05 | 0.000190304 | jmjC domain-containing protein C2orf60                     |
| TGME49_268170 | -8.46 | 5.25 | 3.75E-05 | 0.000190752 | hypothetical protein                                       |
| TGME49_314660 | -1.38 | 6.48 | 3.76E-05 | 0.000191487 | TPRX1 protein                                              |
| TGME49_266800 | -1.94 | 6.24 | 3.77E-05 | 0.000191487 | integral membrane protein, putative                        |
| TGME49_222020 | -2.29 | 6.35 | 3.86E-05 | 0.000196109 | phosphoglycerate kinase PGKII                              |
| TGME49_213480 | -2.18 | 5.67 | 3.87E-05 | 0.000196618 | hypothetical protein                                       |
| TGME49_269320 | -8.43 | 5.04 | 3.87E-05 | 0.000196618 | hypothetical protein                                       |
| TGME49_208710 | 1.64  | 5.63 | 3.93E-05 | 0.000199279 | DNA/RNA non-specific endonuclease                          |
| TGME49_260510 | -2.86 | 5.73 | 3.94E-05 | 0.000199519 | ubiquitin thioesterase otubain-like family protein         |
| TGME49_297790 | -2.08 | 6.27 | 4.01E-05 | 0.000203034 | hypothetical protein                                       |
| TGME49_315600 | -8.42 | 5.50 | 4.03E-05 | 0.000203956 | MCM2/3/5 family protein                                    |
| TGME49_223130 | 1.81  | 5.12 | 4.08E-05 | 0.000206348 | hypothetical protein                                       |
| TGME49_295590 | 1.89  | 4.96 | 4.13E-05 | 0.000208402 | hypothetical protein                                       |
| TGME49_244720 | -3.58 | 5.51 | 4.18E-05 | 0.000210906 | hypothetical protein                                       |
| TGME49_227310 | -3.61 | 5.53 | 4.22E-05 | 0.00021262  | hypothetical protein                                       |
| TGME49_243340 | -8.35 | 5.12 | 4.23E-05 | 0.000212906 | atypical MEK-related kinase (incomplete catalytic triad)   |
| TGME49_212090 | 1.09  | 6.61 | 4.24E-05 | 0.000213234 | hypothetical protein                                       |
| TGME49_267140 | -8.43 | 4.84 | 4.25E-05 | 0.000213234 | SAG-related sequence SRS38B                                |

|               |       |       |          |             |                                                           |
|---------------|-------|-------|----------|-------------|-----------------------------------------------------------|
| TGME49_260160 | 2.93  | 4.70  | 4.28E-05 | 0.000214709 | hypothetical protein                                      |
| TGME49_277540 | -8.37 | 4.89  | 4.29E-05 | 0.000215336 | hypothetical protein                                      |
| TGME49_223450 | -1.66 | 6.86  | 4.37E-05 | 0.000219167 | ubiquitin carboxyl-terminal hydrolase                     |
| TGME49_275330 | -3.59 | 5.64  | 4.38E-05 | 0.000219428 | ribosomal protein RPL29                                   |
| TGME49_299110 | -2.10 | 6.49  | 4.40E-05 | 0.000220231 | cleft lip and palate transmembrane protein 1 (clptm1) pr  |
| TGME49_313385 | 1.79  | 5.03  | 4.44E-05 | 0.000221856 | hypothetical protein                                      |
| TGME49_289000 | -2.86 | 5.79  | 4.46E-05 | 0.000222826 | hypothetical protein                                      |
| TGME49_287270 | -2.49 | 6.15  | 4.49E-05 | 0.000224204 | hypothetical protein                                      |
| TGME49_205170 | 1.23  | 8.72  | 4.56E-05 | 0.000227273 | hypothetical protein                                      |
| TGME49_257990 | -1.53 | 6.77  | 4.57E-05 | 0.000227347 | heat shock protein 101, putative                          |
| TGME49_312380 | -8.34 | 4.96  | 4.57E-05 | 0.000227347 | tetratricopeptide repeat-containing protein               |
| TGME49_278470 | -3.72 | 5.56  | 4.60E-05 | 0.000228802 | hypothetical protein                                      |
| TGME49_306210 | -8.50 | 5.06  | 4.66E-05 | 0.000231222 | RNA polymerase II accessory factor CDC73                  |
| TGME49_297720 | -1.12 | 7.54  | 4.73E-05 | 0.0002344   | trehalose-phosphatase                                     |
| TGME49_289150 | 1.12  | 6.22  | 4.74E-05 | 0.000234995 | hypothetical protein                                      |
| TGME49_309050 | -8.38 | 4.88  | 4.75E-05 | 0.000235139 | hypothetical protein                                      |
| TGME49_229340 | -8.33 | 4.88  | 4.78E-05 | 0.000236174 | hypothetical protein                                      |
| TGME49_252400 | 2.94  | 5.14  | 4.80E-05 | 0.000236912 | HIT zinc finger protein                                   |
| TGME49_250880 | -1.64 | 7.90  | 4.80E-05 | 0.000236912 | kinase, pfkB family protein                               |
| TGME49_269250 | -1.29 | 7.17  | 4.84E-05 | 0.00023882  | Mov34/MPN/PAD-1 family protein                            |
| TGME49_268720 | -2.88 | 5.82  | 4.88E-05 | 0.000240507 | Hrf1 family protein                                       |
| TGME49_300010 | -8.38 | 4.88  | 4.90E-05 | 0.000241502 | hypothetical protein                                      |
| TGME49_246190 | -2.48 | 6.02  | 4.93E-05 | 0.000243042 | hypothetical protein                                      |
| TGME49_239610 | -3.56 | 5.48  | 4.95E-05 | 0.000243551 | hypothetical protein                                      |
| TGME49_203390 | -1.41 | 7.14  | 4.97E-05 | 0.000244435 | CRAL/TRIO domain-containing protein                       |
| TGME49_289180 | -8.35 | 5.18  | 4.98E-05 | 0.00024457  | thioredoxin family redox-active protein, putative         |
| TGME49_205690 | 1.07  | 6.66  | 4.99E-05 | 0.000244855 | hypothetical protein                                      |
| TGME49_233300 | -2.85 | 5.35  | 5.06E-05 | 0.000248176 | RhoGAP domain-containing protein                          |
| TGME49_277070 | 1.37  | 5.84  | 5.07E-05 | 0.000248828 | SWI2/SNF2-containing protein                              |
| TGME49_240300 | -8.36 | 5.18  | 5.09E-05 | 0.000249315 | zinc finger domain, LSD1 subclass domain-containing pro   |
| TGME49_258625 | -8.44 | 4.74  | 5.09E-05 | 0.0002494   | peptidyl-prolyl cis-trans isomerase, FKBP-type domain-c   |
| TGME49_249600 | -8.35 | 4.74  | 5.16E-05 | 0.000252435 | hypothetical protein                                      |
| TGME49_251790 | 1.27  | 6.44  | 5.20E-05 | 0.000254231 | hypothetical protein                                      |
| TGME49_240900 | 1.11  | 6.85  | 5.21E-05 | 0.000254421 | AP2 domain transcription factor AP2VI-2                   |
| TGME49_259830 | 1.49  | 6.46  | 5.31E-05 | 0.000259235 | diacylglycerol kinase catalytic domain-containing protein |
| TGME49_278130 | -2.05 | 6.84  | 5.33E-05 | 0.000259735 | hypothetical protein                                      |
| TGME49_215775 | -1.13 | 10.26 | 5.35E-05 | 0.000260806 | roptry protein ROP8                                       |
| TGME49_313360 | 1.20  | 6.20  | 5.44E-05 | 0.000264592 | hypothetical protein                                      |
| TGME49_239700 | -2.87 | 5.88  | 5.44E-05 | 0.000264592 | regulator of chromosome condensation (RCC1) repeat-c      |
| TGME49_235460 | 1.19  | 6.18  | 5.54E-05 | 0.00026941  | hypothetical protein                                      |
| TGME49_267560 | 1.89  | 5.89  | 5.55E-05 | 0.000269577 | folate-binding protein YgfZ protein                       |
| TGME49_231640 | -1.24 | 10.99 | 5.62E-05 | 0.000272847 | alveolin domain containing intermediate filament IMC1     |
| TGME49_222060 | -2.32 | 5.98  | 5.65E-05 | 0.000273996 | hypothetical protein                                      |
| TGME49_269075 | -8.49 | 5.19  | 5.82E-05 | 0.000281612 | hypothetical protein                                      |
| TGME49_249890 | 1.71  | 5.11  | 5.83E-05 | 0.00028193  | hypothetical protein                                      |
| TGME49_277870 | -2.06 | 6.10  | 5.89E-05 | 0.000284864 | hypothetical protein                                      |
| TGME49_280522 | -1.47 | 6.97  | 5.92E-05 | 0.000285703 | hypothetical protein                                      |
| TGME49_202750 | -8.29 | 5.03  | 5.92E-05 | 0.000285703 | 3' exoribonuclease family, domain 1 domain-containing     |
| TGME49_294705 | -8.35 | 5.03  | 5.92E-05 | 0.000285703 | hypothetical protein                                      |
| TGME49_242845 | -3.56 | 5.19  | 5.94E-05 | 0.000286428 | hypothetical protein                                      |
| TGME49_233130 | 1.32  | 6.19  | 5.99E-05 | 0.000288705 | nucleoside transporter protein                            |
| TGME49_280410 | -1.69 | 6.69  | 6.06E-05 | 0.000291559 | 3'5'-cyclic nucleotide phosphodiesterase domain-contain   |
| TGME49_212920 | 1.53  | 5.72  | 6.08E-05 | 0.000292344 | hypothetical protein                                      |
| TGME49_223150 | -8.29 | 5.15  | 6.08E-05 | 0.000292344 | START domain-containing protein                           |
| TGME49_212270 | 1.53  | 9.40  | 6.13E-05 | 0.000294284 | hypothetical protein                                      |
| TGME49_219810 | 1.25  | 8.82  | 6.13E-05 | 0.000294284 | hypothetical protein                                      |
| TGME49_268210 | -8.82 | 5.75  | 6.15E-05 | 0.000295222 | AGC kinase                                                |

|               |       |      |          |             |                                                         |
|---------------|-------|------|----------|-------------|---------------------------------------------------------|
| TGME49_233490 | -8.38 | 5.10 | 6.21E-05 | 0.000297476 | hypothetical protein                                    |
| TGME49_226660 | -1.34 | 7.06 | 6.23E-05 | 0.000298276 | hypothetical protein                                    |
| TGME49_306430 | -1.32 | 6.93 | 6.27E-05 | 0.000299915 | hypothetical protein                                    |
| TGME49_200430 | -8.30 | 4.89 | 6.30E-05 | 0.000301338 | cytidine and deoxycytidylate deaminase zinc-binding reg |
| TGME49_272680 | -8.28 | 5.08 | 6.31E-05 | 0.00030149  | hypothetical protein                                    |
| TGME49_312430 | 1.25  | 6.02 | 6.34E-05 | 0.000302673 | hypothetical protein                                    |
| TGME49_216390 | -2.81 | 5.89 | 6.37E-05 | 0.000303563 | RNA methyltransferase, TrmH family protein              |
| TGME49_254606 | 2.32  | 5.92 | 6.37E-05 | 0.000303593 | hypothetical protein                                    |
| TGME49_213600 | -8.28 | 5.17 | 6.53E-05 | 0.000310903 | hypothetical protein                                    |
| TGME49_218280 | -1.18 | 7.67 | 6.58E-05 | 0.000312588 | eukaryotic porin, putative                              |
| TGME49_221350 | -3.51 | 5.68 | 6.59E-05 | 0.000313054 | Ctr copper transporter family protein                   |
| TGME49_239320 | -8.28 | 4.74 | 6.62E-05 | 0.000314061 | BolA family protein                                     |
| TGME49_304470 | -2.80 | 5.83 | 6.63E-05 | 0.000314213 | oxidoreductase, putative                                |
| TGME49_248700 | -1.40 | 9.62 | 6.64E-05 | 0.000314701 | alveolin domain containing intermediate filament IMC12  |
| TGME49_213590 | -1.33 | 6.96 | 6.66E-05 | 0.000315256 | hypothetical protein                                    |
| TGME49_233340 | -2.23 | 6.12 | 6.67E-05 | 0.000315479 | hypothetical protein                                    |
| TGME49_277760 | -1.28 | 6.96 | 6.70E-05 | 0.000316635 | adenylosuccinate lyase, putative                        |
| TGME49_218370 | -2.20 | 5.98 | 6.75E-05 | 0.000318548 | hypothetical protein                                    |
| TGME49_231180 | 1.22  | 6.18 | 6.79E-05 | 0.000320494 | hypothetical protein                                    |
| TGME49_272670 | -8.28 | 4.99 | 6.87E-05 | 0.000323863 | peptidase family M3 protein                             |
| TGME49_246040 | -1.87 | 6.20 | 6.89E-05 | 0.000324437 | MIF4G domain-containing protein                         |
| TGME49_257370 | 2.16  | 5.96 | 6.92E-05 | 0.000325525 | hypothetical protein                                    |
| TGME49_265070 | -2.87 | 5.58 | 6.92E-05 | 0.000325525 | hypothetical protein                                    |
| TGME49_230010 | -1.88 | 6.26 | 6.94E-05 | 0.000326056 | hypothetical protein                                    |
| TGME49_227010 | -8.41 | 5.24 | 6.96E-05 | 0.000326628 | rhoptry kinase family protein ROP30                     |
| TGME49_231030 | -3.52 | 5.64 | 7.01E-05 | 0.000329004 | hypothetical protein                                    |
| TGME49_309400 | -2.53 | 5.88 | 7.02E-05 | 0.000329135 | RecF/RecN/SMC N terminal domain-containing protein      |
| TGME49_320550 | -1.82 | 6.64 | 7.04E-05 | 0.00032975  | hypothetical protein                                    |
| TGME49_209740 | 1.69  | 5.20 | 7.06E-05 | 0.000330755 | hypothetical protein                                    |
| TGME49_222192 | -8.27 | 5.28 | 7.10E-05 | 0.000332281 | hypothetical protein                                    |
| TGME49_253300 | 2.25  | 4.94 | 7.13E-05 | 0.000333408 | hypothetical protein                                    |
| TGME49_315500 | -1.57 | 6.66 | 7.23E-05 | 0.000337822 | hypothetical protein                                    |
| TGME49_255635 | -3.63 | 4.83 | 7.35E-05 | 0.000343419 | hypothetical protein                                    |
| TGME49_263290 | 2.69  | 6.06 | 7.40E-05 | 0.000345422 | rhomboid protease ROM2                                  |
| TGME49_299015 | -8.68 | 4.85 | 7.48E-05 | 0.000348746 | hypothetical protein                                    |
| TGME49_224235 | -8.25 | 5.14 | 7.53E-05 | 0.000350732 | translation initiation factor IF-3 protein              |
| TGME49_246030 | -8.28 | 5.02 | 7.59E-05 | 0.000353209 | mediator complex subunit MED17                          |
| TGME49_309390 | -8.27 | 4.72 | 7.60E-05 | 0.000353328 | hypothetical protein                                    |
| TGME49_269885 | -1.18 | 8.06 | 7.61E-05 | 0.000353557 | rhoptry metalloprotease toxolysin TLN1                  |
| TGME49_206390 | -8.25 | 4.99 | 7.61E-05 | 0.000353557 | hypothetical protein                                    |
| TGME49_249690 | -3.64 | 5.20 | 7.65E-05 | 0.000355105 | hypothetical protein                                    |
| TGME49_321170 | 2.76  | 5.28 | 7.69E-05 | 0.000356687 | Toxoplasma gondii family C protein                      |
| TGME49_216170 | -3.66 | 5.73 | 7.71E-05 | 0.000357169 | SufS subfamily cysteine desulfurase                     |
| TGME49_289920 | 1.18  | 8.09 | 7.96E-05 | 0.000368503 | hypothetical protein                                    |
| TGME49_223900 | 1.89  | 5.15 | 8.18E-05 | 0.000378446 | hypothetical protein                                    |
| TGME49_209160 | -1.05 | 7.51 | 8.28E-05 | 0.00038214  | myristoyl CoA:protein N-myristoyltransferase            |
| TGME49_214190 | 1.70  | 5.29 | 8.29E-05 | 0.000382521 | SAG-related sequence SRS46                              |
| TGME49_209930 | -8.28 | 5.30 | 8.42E-05 | 0.000388029 | hypothetical protein                                    |
| TGME49_291140 | -1.02 | 8.46 | 8.43E-05 | 0.000388447 | CCR4-Not complex component, Not1 protein                |
| TGME49_240540 | -2.03 | 6.41 | 8.50E-05 | 0.000391496 | hypothetical protein                                    |
| TGME49_230580 | -8.23 | 5.21 | 8.61E-05 | 0.000395889 | hypothetical protein                                    |
| TGME49_318290 | -8.23 | 5.09 | 8.64E-05 | 0.000397017 | hypothetical protein                                    |
| TGME49_284170 | -8.25 | 4.98 | 8.71E-05 | 0.000400016 | DHHC zinc finger domain-containing protein              |
| TGME49_242830 | -1.77 | 6.33 | 8.77E-05 | 0.000402353 | XRN 5'-3' exonuclease N-terminus protein                |
| TGME49_224600 | -3.49 | 5.60 | 8.83E-05 | 0.000404642 | GTP binding protein                                     |
| TGME49_255400 | 1.27  | 6.07 | 8.85E-05 | 0.000405028 | hypothetical protein                                    |
| TGME49_242435 | -3.49 | 5.43 | 8.99E-05 | 0.000411065 | hypothetical protein                                    |

|               |       |      |             |             |                                                              |
|---------------|-------|------|-------------|-------------|--------------------------------------------------------------|
| TGME49_242800 | -1.67 | 6.66 | 9.05E-05    | 0.000413271 | ribosome biogenesis protein NSA2, putative                   |
| TGME49_261510 | 3.07  | 5.09 | 9.06E-05    | 0.000413368 | hypothetical protein                                         |
| TGME49_269650 | -1.46 | 7.00 | 9.16E-05    | 0.000417624 | FFD and TFG box motifs protein                               |
| TGME49_225690 | -1.09 | 8.01 | 9.18E-05    | 0.000418181 | hypothetical protein                                         |
| TGME49_281400 | -2.25 | 6.55 | 9.22E-05    | 0.000419646 | phosphofructokinase domain-containing protein                |
| TGME49_249020 | -2.17 | 6.04 | 9.44E-05    | 0.000429112 | kinesin motor domain-containing protein                      |
| TGME49_312220 | -3.50 | 5.27 | 9.46E-05    | 0.000429727 | mitochondrial inner membrane translocase subunit TIM         |
| TGME49_306350 | 1.06  | 6.97 | 9.47E-05    | 0.000430019 | variable surface lipoprotein                                 |
| TGME49_268900 | -8.21 | 5.16 | 9.56E-05    | 0.000433991 | dense granular protein GRA10                                 |
| TGME49_221270 | -1.47 | 6.87 | 9.58E-05    | 0.000434505 | oxidoreductase, 2OG-Fe(II) oxygenase family protein          |
| TGME49_262650 | -3.54 | 5.56 | 9.58E-05    | 0.000434505 | WD domain, G-beta repeat-containing protein                  |
| TGME49_203358 | -3.49 | 5.46 | 9.76E-05    | 0.000442123 | hypothetical protein                                         |
| TGME49_213890 | -8.36 | 5.03 | 9.84E-05    | 0.000444831 | Myb family DNA-binding domain-containing protein             |
| TGME49_209270 | -8.29 | 5.06 | 9.89E-05    | 0.000447136 | hypothetical protein                                         |
| TGME49_225300 | -1.76 | 6.43 | 9.92E-05    | 0.000447886 | hypothetical protein                                         |
| TGME49_243490 | -8.22 | 5.07 | 0.00010147  | 0.000458042 | BCS1 family isoform 9, putative                              |
| TGME49_260400 | 1.33  | 6.04 | 0.00010197  | 0.000460017 | hypothetical protein                                         |
| TGME49_262860 | -2.77 | 5.32 | 0.000102887 | 0.000463589 | ADP-ribosylation factor family protein 1, putative           |
| TGME49_224810 | -3.76 | 5.52 | 0.000105486 | 0.000474429 | hypothetical protein                                         |
| TGME49_260370 | -1.97 | 6.27 | 0.000105842 | 0.00047574  | AtPH1 family protein                                         |
| TGME49_234950 | 1.59  | 6.24 | 0.00010591  | 0.000475759 | protein kinase (incomplete catalytic triad)                  |
| TGME49_305540 | -1.64 | 6.49 | 0.000106158 | 0.000476583 | hypothetical protein                                         |
| TGME49_213670 | -1.45 | 6.71 | 0.000106364 | 0.000477219 | hypothetical protein                                         |
| TGME49_316900 | -1.67 | 6.55 | 0.000107698 | 0.000482912 | Sas10 C-terminal domain-containing protein                   |
| TGME49_299190 | 1.52  | 5.76 | 0.000108605 | 0.000486682 | B-box zinc finger domain-containing protein                  |
| TGME49_295450 | -1.26 | 7.30 | 0.000108684 | 0.00048674  | sjoegren syndrome nuclear autoantigen 1 family protein       |
| TGME49_219820 | -1.03 | 7.72 | 0.000109923 | 0.000491395 | polyubiquitin UbC, putative                                  |
| TGME49_307810 | -1.22 | 7.09 | 0.000110464 | 0.000493218 | hypothetical protein                                         |
| TGME49_272570 | 2.02  | 5.28 | 0.000110585 | 0.000493222 | dihydrouridine synthase (dus) protein                        |
| TGME49_255890 | -2.76 | 5.76 | 0.000110598 | 0.000493222 | pyridine nucleotide-disulfide oxidoreductase domain-co       |
| TGME49_259700 | -1.57 | 6.48 | 0.000110873 | 0.000494152 | hypothetical protein                                         |
| TGME49_216930 | -1.54 | 6.83 | 0.000112602 | 0.00050125  | cholinephosphate cytidylyltransferase                        |
| TGME49_281675 | 1.83  | 4.86 | 0.000113103 | 0.000503179 | protein kinase, putative                                     |
| TGME49_234520 | -2.17 | 5.92 | 0.000114717 | 0.000510053 | U2 snRNP auxilliary factor, large subunit, splicing factor s |
| TGME49_291050 | -1.43 | 7.12 | 0.000115076 | 0.000511342 | histone kinase SNF1, putative                                |
| TGME49_223070 | -1.18 | 7.72 | 0.000115276 | 0.000511921 | hypothetical protein                                         |
| TGME49_236510 | 1.16  | 6.37 | 0.000115578 | 0.000512955 | hypothetical protein                                         |
| TGME49_209240 | 1.25  | 5.74 | 0.000115726 | 0.000513306 | RNA methyltransferase                                        |
| TGME49_225310 | -1.30 | 6.93 | 0.000116482 | 0.000516347 | ARF1-directed GTPase-activating protein, putative            |
| TGME49_233890 | -2.17 | 6.03 | 0.000117321 | 0.000519757 | hypothetical protein                                         |
| TGME49_244610 | -3.43 | 5.46 | 0.000119073 | 0.000526886 | zinc finger, C3HC4 type (RING finger) domain-containing      |
| TGME49_309130 | -8.17 | 5.04 | 0.000119928 | 0.000530351 | hypothetical protein                                         |
| TGME49_221200 | 1.15  | 7.36 | 0.000120436 | 0.000532282 | CW-type Zinc Finger protein                                  |
| TGME49_277550 | -8.19 | 4.87 | 0.000121209 | 0.000535376 | UvrD/REP helicase domain-containing protein                  |
| TGME49_204380 | -1.45 | 6.95 | 0.00012179  | 0.000537623 | hypothetical protein                                         |
| TGME49_255740 | -2.80 | 5.77 | 0.000121982 | 0.000538146 | hypothetical protein                                         |
| TGME49_240730 | -3.44 | 5.10 | 0.000122195 | 0.000538764 | hypothetical protein                                         |
| TGME49_268430 | -3.47 | 5.49 | 0.000123516 | 0.000544265 | hypothetical protein                                         |
| TGME49_249780 | -1.23 | 7.43 | 0.000124124 | 0.000546618 | hypothetical protein                                         |
| TGME49_267530 | 1.83  | 4.71 | 0.000124567 | 0.000548244 | hypothetical protein                                         |
| TGME49_225330 | -1.38 | 6.63 | 0.000126342 | 0.000555723 | hypothetical protein                                         |
| TGME49_248550 | -3.59 | 5.45 | 0.000126485 | 0.000556021 | SPX domain-containing protein                                |
| TGME49_225680 | -2.74 | 5.66 | 0.000126613 | 0.000556253 | hypothetical protein                                         |
| TGME49_268750 | -3.47 | 5.37 | 0.000127482 | 0.00055974  | peptidyl-prolyl cis-trans isomerase E, putative              |
| TGME49_275750 | -1.76 | 6.27 | 0.000127982 | 0.0005616   | small nuclear ribonucleoprotein E, putative                  |
| TGME49_258920 | -8.20 | 4.81 | 0.000128069 | 0.000561649 | hypothetical protein                                         |
| TGME49_264840 | -8.15 | 5.33 | 0.000128435 | 0.000562313 | ATP-dependent DNA helicase, RecQ family protein              |

|               |       |      |             |             |                                                          |
|---------------|-------|------|-------------|-------------|----------------------------------------------------------|
| TGME49_258230 | -2.70 | 5.91 | 0.000128646 | 0.000562844 | rhoptyr kinase family protein ROP20                      |
| TGME49_252340 | 1.23  | 7.56 | 0.000130347 | 0.000569949 | hypothetical protein                                     |
| TGME49_264752 | -3.52 | 5.23 | 0.000130487 | 0.000570225 | HEAT repeat-containing protein                           |
| TGME49_294050 | 1.52  | 7.02 | 0.000130669 | 0.000570424 | hypothetical protein                                     |
| TGME49_309890 | -2.78 | 5.90 | 0.000130733 | 0.000570424 | hypothetical protein                                     |
| TGME49_319940 | -8.17 | 4.88 | 0.000131226 | 0.000572103 | hypothetical protein                                     |
| TGME49_224150 | -8.15 | 4.83 | 0.000131901 | 0.000574705 | hypothetical protein                                     |
| TGME49_258060 | -1.13 | 7.12 | 0.000132186 | 0.000575271 | myosin heavy chain, putative                             |
| TGME49_216380 | -2.22 | 6.35 | 0.000132464 | 0.000575802 | phospholipid-translocating P-type ATPase, flippase subfa |
| TGME49_316300 | -8.15 | 5.17 | 0.000132398 | 0.000575802 | ATP-dependent DNA helicase, RecQ family protein          |
| TGME49_216770 | -3.45 | 5.97 | 0.000132972 | 0.00057767  | hypothetical protein                                     |
| TGME49_202080 | -8.15 | 4.81 | 0.00013325  | 0.000578536 | hypothetical protein                                     |
| TGME49_261940 | -8.16 | 4.88 | 0.000134275 | 0.000582303 | hydrolase, alpha/beta fold family protein                |
| TGME49_301120 | -1.62 | 6.22 | 0.000135466 | 0.000587127 | acetyl-CoA acetyltransferase                             |
| TGME49_207960 | -1.98 | 5.90 | 0.000136174 | 0.000589846 | hypothetical protein                                     |
| TGME49_297780 | -2.36 | 6.07 | 0.000138486 | 0.000598697 | ATPase/histidine kinase/DNA gyrase B/HSP90 domain-cc     |
| TGME49_208722 | -3.48 | 5.29 | 0.000138541 | 0.000598697 | hypothetical protein                                     |
| TGME49_256090 | -8.16 | 4.73 | 0.000138695 | 0.000599015 | glycerophosphodiester phosphodiesterase family protein   |
| TGME49_245650 | 2.08  | 4.74 | 0.000139062 | 0.00060025  | hypothetical protein                                     |
| TGME49_207480 | -1.95 | 6.41 | 0.000139524 | 0.000601889 | GCC2 and GCC3 domain-containing protein                  |
| TGME49_216760 | -8.19 | 4.80 | 0.000139893 | 0.000603129 | RNA pseudouridine synthase superfamily protein           |
| TGME49_272520 | -1.36 | 6.87 | 0.00014204  | 0.00061096  | hypothetical protein                                     |
| TGME49_306530 | -8.15 | 5.01 | 0.000141884 | 0.00061096  | hypothetical protein                                     |
| TGME49_310350 | -1.75 | 6.39 | 0.000142496 | 0.000612565 | PGAP1 family protein                                     |
| TGME49_265460 | 1.18  | 6.01 | 0.000143355 | 0.0006159   | hypothetical protein                                     |
| TGME49_238180 | -1.04 | 7.48 | 0.000145183 | 0.000622613 | 26s proteasome regulatory complex subunit, putative      |
| TGME49_240810 | -1.07 | 7.26 | 0.000145138 | 0.000622613 | hypothetical protein                                     |
| TGME49_223690 | -8.14 | 5.06 | 0.000145432 | 0.000623013 | hypothetical protein                                     |
| TGME49_249698 | -8.20 | 4.98 | 0.000146938 | 0.000629103 | hypothetical protein                                     |
| TGME49_204420 | 2.28  | 6.08 | 0.000148807 | 0.000636366 | oocyst wall protein OWP1                                 |
| TGME49_218358 | -8.17 | 4.99 | 0.000150211 | 0.000641999 | zinc knuckle domain-containing protein                   |
| TGME49_262390 | -1.70 | 6.20 | 0.000150832 | 0.000644281 | TLD protein                                              |
| TGME49_234490 | -2.36 | 6.15 | 0.000151801 | 0.000647742 | kelch repeat-containing protein                          |
| TGME49_246050 | -8.34 | 4.73 | 0.000151817 | 0.000647742 | hypothetical protein                                     |
| TGME49_233310 | -3.41 | 5.31 | 0.000152368 | 0.000649715 | peptidase D, putative                                    |
| TGME49_260450 | -8.14 | 5.10 | 0.000153325 | 0.000653419 | DEAD/DEAH box helicase domain-containing protein         |
| TGME49_234410 | -1.04 | 7.49 | 0.000154279 | 0.000657109 | transporter, small conductance mechanosensitive ion ch   |
| TGME49_258350 | 1.50  | 5.57 | 0.00015507  | 0.000659946 | hypothetical protein                                     |
| TGME49_266890 | -1.43 | 6.92 | 0.000155269 | 0.000659946 | hypothetical protein                                     |
| TGME49_311160 | -1.53 | 6.69 | 0.000155302 | 0.000659946 | PWI domain-containing protein                            |
| TGME49_305600 | -8.12 | 4.82 | 0.000155267 | 0.000659946 | hypothetical protein                                     |
| TGME49_291590 | -8.12 | 4.86 | 0.000155414 | 0.00066004  | hypothetical protein                                     |
| TGME49_308070 | -2.16 | 5.86 | 0.000157262 | 0.000667506 | hypothetical protein                                     |
| TGME49_288330 | -3.41 | 5.36 | 0.000157563 | 0.000668402 | histone lysine methyltransferase, SET, putative          |
| TGME49_290740 | -8.14 | 4.96 | 0.000159221 | 0.000675048 | hypothetical protein                                     |
| TGME49_240460 | -2.70 | 5.64 | 0.000160522 | 0.000679782 | AP2 domain transcription factor AP2VI-1                  |
| TGME49_265850 | 1.78  | 6.27 | 0.000162229 | 0.0006865   | hypothetical protein                                     |
| TGME49_238070 | -3.39 | 5.04 | 0.000162294 | 0.0006865   | glutaredoxin domain-containing protein                   |
| TGME49_263590 | -2.38 | 5.74 | 0.00016266  | 0.000687656 | hypothetical protein                                     |
| TGME49_316180 | -2.10 | 5.67 | 0.000163149 | 0.000689327 | hypothetical protein                                     |
| TGME49_215660 | -8.11 | 5.03 | 0.000163409 | 0.000689639 | hypothetical protein                                     |
| TGME49_273550 | -3.42 | 5.26 | 0.000164884 | 0.000695069 | hypothetical protein                                     |
| TGME49_226600 | -1.80 | 6.43 | 0.000167232 | 0.000704567 | syntaxin 5, putative                                     |
| TGME49_221600 | -8.12 | 5.26 | 0.000167579 | 0.000705625 | hypothetical protein                                     |
| TGME49_291980 | -1.26 | 7.41 | 0.000168847 | 0.000710562 | HECT-domain (ubiquitin-transferase) domain-containing    |
| TGME49_318525 | -1.61 | 6.78 | 0.000169614 | 0.000713383 | hypothetical protein                                     |
| TGME49_271200 | -1.43 | 6.92 | 0.000170511 | 0.000716066 | AP2 domain transcription factor AP2VIII-5                |

|               |       |      |             |             |                                                            |
|---------------|-------|------|-------------|-------------|------------------------------------------------------------|
| TGME49_212970 | 3.81  | 5.08 | 0.000171671 | 0.000720394 | protein kinase (incomplete catalytic triad)                |
| TGME49_202800 | -8.15 | 4.80 | 0.000173191 | 0.00072636  | cytochrome c oxidase assembly protein COX11, putative      |
| TGME49_247930 | -8.15 | 4.68 | 0.000173564 | 0.000727513 | SNARE domain-containing protein                            |
| TGME49_320260 | 1.68  | 5.77 | 0.000173906 | 0.000728533 | hypothetical protein                                       |
| TGME49_310660 | -3.40 | 5.16 | 0.000174479 | 0.000730522 | Dullard family phosphatase domain-containing protein       |
| TGME49_288800 | 2.81  | 6.83 | 0.000174901 | 0.000731873 | endonuclease/exonuclease/phosphatase family protein        |
| TGME49_204550 | -2.74 | 5.62 | 0.000175079 | 0.000732204 | hypothetical protein                                       |
| TGME49_316360 | -3.48 | 5.40 | 0.000175774 | 0.000734694 | hypothetical protein                                       |
| TGME49_259000 | -8.11 | 4.76 | 0.000175939 | 0.000734968 | hypothetical protein                                       |
| TGME49_300280 | -2.41 | 5.77 | 0.000176986 | 0.000738508 | LSM domain-containing protein                              |
| TGME49_264870 | 1.55  | 7.51 | 0.000177372 | 0.000739077 | Sodium:neurotransmitter symporter family protein           |
| TGME49_240430 | 1.39  | 5.61 | 0.000177353 | 0.000739077 | glyoxalase family protein                                  |
| TGME49_248400 | -1.92 | 6.09 | 0.000177423 | 0.000739077 | glyoxalase I, putative                                     |
| TGME49_315930 | -1.08 | 7.36 | 0.000178997 | 0.000744798 | integral membrane protein, DUF56 family protein, putative  |
| TGME49_239300 | -1.69 | 6.35 | 0.00018009  | 0.000748083 | hypothetical protein                                       |
| TGME49_263330 | -8.20 | 4.96 | 0.000181618 | 0.000754006 | Adaptin ear-binding coat-associated protein 2 (NECAP-2)    |
| TGME49_253320 | -8.09 | 4.96 | 0.000181744 | 0.000754105 | hypothetical protein                                       |
| TGME49_202460 | -1.69 | 6.49 | 0.000182743 | 0.000757398 | diacylglycerol kinase accessory domain (presumed) domain   |
| TGME49_201230 | -2.70 | 5.61 | 0.000184408 | 0.000763874 | kinesin motor domain-containing protein                    |
| TGME49_257290 | -8.16 | 5.89 | 0.000185511 | 0.000768011 | RNA 2'-phosphotransferase, Tpt1/KptA family protein        |
| TGME49_307980 | 1.94  | 5.22 | 0.000186563 | 0.000771504 | GTP-binding protein lepA, putative                         |
| TGME49_285470 | 1.85  | 5.36 | 0.000191169 | 0.000790108 | patched family protein                                     |
| TGME49_244700 | 1.43  | 7.88 | 0.000191786 | 0.000792215 | NAD(+)/NADH kinase domain-containing protein               |
| TGME49_208040 | -2.08 | 5.83 | 0.000193048 | 0.000796983 | aldo-keto reductase                                        |
| TGME49_255390 | -3.38 | 5.42 | 0.00019365  | 0.000798355 | HEAT repeat-containing protein                             |
| TGME49_258850 | -8.11 | 4.82 | 0.000193704 | 0.000798355 | hypothetical protein                                       |
| TGME49_292975 | -2.70 | 6.05 | 0.000194147 | 0.000799733 | hypothetical protein                                       |
| TGME49_312660 | -2.08 | 5.79 | 0.000194942 | 0.000802562 | hypothetical protein                                       |
| TGME49_269670 | -2.67 | 5.91 | 0.000199593 | 0.000820338 | hypothetical protein                                       |
| TGME49_297150 | -1.20 | 7.18 | 0.000201098 | 0.000826066 | MORN repeat-containing protein                             |
| TGME49_304760 | 1.04  | 7.95 | 0.000202607 | 0.000831801 | RNA recognition motif-containing protein                   |
| TGME49_244660 | -3.40 | 5.30 | 0.000203878 | 0.000836555 | hypothetical protein                                       |
| TGME49_219550 | -1.13 | 7.18 | 0.00020608  | 0.000844653 | dihydrodipolyllysine-residue succinyltransferase component |
| TGME49_295340 | -1.12 | 7.60 | 0.000206468 | 0.000845775 | UV excision repair protein Rad23 protein                   |
| TGME49_234220 | -1.77 | 6.36 | 0.000208433 | 0.000852881 | hypothetical protein                                       |
| TGME49_313300 | 1.28  | 5.75 | 0.000209514 | 0.00085683  | YL1 nuclear protein C-terminal domain-containing protein   |
| TGME49_258700 | -1.25 | 6.90 | 0.000211428 | 0.000863701 | transporter, major facilitator family protein              |
| TGME49_298020 | -1.33 | 6.88 | 0.000211623 | 0.000864019 | DEAD-family helicase                                       |
| TGME49_211600 | -2.09 | 6.15 | 0.000213071 | 0.000868972 | hypothetical protein                                       |
| TGME49_204100 | -1.49 | 6.50 | 0.00021343  | 0.000869899 | eIF2 kinase IF2K-C                                         |
| TGME49_263730 | -1.92 | 6.40 | 0.000213769 | 0.000869899 | FAD-dependent glycerol-3-phosphate dehydrogenase           |
| TGME49_266390 | -8.07 | 4.86 | 0.000213942 | 0.000870125 | DNA mismatch repair protein, C-terminal domain-containing  |
| TGME49_232090 | -2.06 | 5.75 | 0.00021421  | 0.000870735 | 3-hydroxyacyl-CoA dehydrogenase, NAD binding domain        |
| TGME49_227300 | 1.91  | 4.84 | 0.000215504 | 0.000875513 | hypothetical protein                                       |
| TGME49_290180 | 2.30  | 5.13 | 0.000215627 | 0.000875533 | AP2 domain transcription factor AP2IX-6                    |
| TGME49_244670 | -1.41 | 6.91 | 0.000220323 | 0.000894109 | hypothetical protein                                       |
| TGME49_239630 | -3.39 | 5.29 | 0.000224066 | 0.000908802 | cytidine and deoxycytidylate deaminase zinc-binding region |
| TGME49_235560 | -8.05 | 5.26 | 0.000227306 | 0.000921435 | hypothetical protein                                       |
| TGME49_270940 | -8.10 | 4.93 | 0.00023287  | 0.000942959 | hypothetical protein                                       |
| TGME49_285950 | -8.09 | 5.02 | 0.000233511 | 0.000945037 | hypothetical protein                                       |
| TGME49_244100 | -1.43 | 6.45 | 0.000233875 | 0.000945989 | snoRNA binding domain-containing protein                   |
| TGME49_201220 | -1.90 | 5.76 | 0.000234539 | 0.000948159 | zinc finger protein                                        |
| TGME49_228340 | -8.07 | 5.00 | 0.000235133 | 0.000950041 | hypothetical protein                                       |
| TGME49_224170 | 1.95  | 5.91 | 0.000236021 | 0.000953109 | SAG-related sequence SRS60A                                |
| TGME49_216850 | -8.06 | 4.72 | 0.000236995 | 0.000956517 | hypothetical protein                                       |
| TGME49_281500 | 1.89  | 4.83 | 0.000237195 | 0.000956803 | hypothetical protein                                       |
| TGME49_318400 | -1.30 | 7.52 | 0.000239265 | 0.000964626 | hypothetical protein                                       |



|               |       |      |             |             |                                                         |
|---------------|-------|------|-------------|-------------|---------------------------------------------------------|
| TGME49_235970 | -1.02 | 8.66 | 0.000240892 | 0.000970127 | eukaryotic initiation factor-2 gamma, putative          |
| TGME49_263840 | -2.06 | 5.67 | 0.000242403 | 0.00097356  | hypothetical protein                                    |
| TGME49_260480 | -3.42 | 4.87 | 0.000242208 | 0.00097356  | leucine rich repeat-containing protein                  |
| TGME49_237290 | -1.30 | 7.15 | 0.000243135 | 0.000975444 | hypothetical protein                                    |
| TGME49_309250 | -1.53 | 6.68 | 0.000243058 | 0.000975444 | hypothetical protein                                    |
| TGME49_218830 | 1.57  | 5.33 | 0.000243427 | 0.000976082 | hypothetical protein                                    |
| TGME49_202640 | -8.04 | 4.76 | 0.00024515  | 0.000982459 | RNA pseudouridine synthase superfamily protein          |
| TGME49_225920 | -2.30 | 5.83 | 0.000246908 | 0.000988432 | hypothetical protein                                    |
| TGME49_271625 | -8.07 | 4.93 | 0.0002472   | 0.000989067 | serine--tRNA ligase                                     |
| TGME49_269770 | -2.69 | 5.57 | 0.000247906 | 0.000991357 | WD domain, G-beta repeat-containing protein             |
| TGME49_293060 | -1.81 | 6.24 | 0.000249973 | 0.000999083 | SPRY domain-containing protein                          |
| TGME49_240710 | -1.71 | 6.51 | 0.000253266 | 0.001011148 | RNA recognition motif-containing protein                |
| TGME49_295980 | -1.93 | 5.98 | 0.000253937 | 0.001012736 | hypothetical protein                                    |
| TGME49_219530 | -3.40 | 5.05 | 0.000253895 | 0.001012736 | hypothetical protein                                    |
| TGME49_298840 | 1.11  | 6.20 | 0.000254627 | 0.001014939 | hypothetical protein                                    |
| TGME49_309580 | -2.64 | 5.70 | 0.000258263 | 0.001028877 | transporter, major facilitator family protein           |
| TGME49_249380 | 1.41  | 7.53 | 0.000259787 | 0.001034392 | DHHC zinc finger domain-containing protein              |
| TGME49_208440 | 1.13  | 7.83 | 0.000260577 | 0.001036421 | hypothetical protein                                    |
| TGME49_208360 | 1.48  | 5.38 | 0.000261017 | 0.001037612 | hypothetical protein                                    |
| TGME49_264140 | -1.45 | 7.26 | 0.000262181 | 0.001041122 | hypothetical protein                                    |
| TGME49_294980 | 1.58  | 6.35 | 0.000263168 | 0.001044478 | hypothetical protein                                    |
| TGME49_212840 | -8.08 | 5.13 | 0.000264795 | 0.001050373 | HIT zinc finger protein                                 |
| TGME49_286270 | -1.67 | 6.58 | 0.000265125 | 0.001051117 | hypothetical protein                                    |
| TGME49_273310 | -1.66 | 6.16 | 0.00026576  | 0.001053069 | hypothetical protein                                    |
| TGME49_315590 | -2.04 | 5.93 | 0.000266111 | 0.001053498 | macro domain-containing protein                         |
| TGME49_278160 | -3.39 | 5.32 | 0.000266153 | 0.001053498 | vesicle transport v-snare protein                       |
| TGME49_244570 | -8.04 | 4.81 | 0.000266507 | 0.001054334 | hypothetical protein                                    |
| TGME49_206640 | 1.11  | 6.95 | 0.000266858 | 0.001054597 | hypothetical protein                                    |
| TGME49_257360 | 1.01  | 6.17 | 0.000266805 | 0.001054597 | hypothetical protein                                    |
| TGME49_220920 | -8.01 | 4.78 | 0.000269623 | 0.001064427 | hypothetical protein                                    |
| TGME49_278770 | -1.25 | 7.22 | 0.000274365 | 0.001081951 | hypothetical protein                                    |
| TGME49_231940 | -1.63 | 6.36 | 0.000274829 | 0.001082623 | ThiF family protein                                     |
| TGME49_252065 | 1.94  | 5.06 | 0.000278413 | 0.001096159 | KRUF family protein                                     |
| TGME49_240660 | -8.05 | 4.90 | 0.000278991 | 0.001097849 | hypothetical protein                                    |
| TGME49_207940 | -3.35 | 5.31 | 0.000281195 | 0.001105934 | ribosomal protein S9, putative                          |
| TGME49_257480 | -2.41 | 6.03 | 0.000283806 | 0.00111561  | NADP-dependent succinate-semialdehyde dehydrogenase     |
| TGME49_202010 | -2.20 | 6.47 | 0.000289192 | 0.001135574 | hypothetical protein                                    |
| TGME49_236280 | 1.75  | 4.85 | 0.000290665 | 0.001140753 | hypothetical protein                                    |
| TGME49_218200 | -2.66 | 5.33 | 0.000294125 | 0.00115372  | UDP-sugar pyrophosphorylase                             |
| TGME49_264880 | -2.05 | 6.07 | 0.00029496  | 0.001155429 | NEDD8-activating enzyme E1 catalytic subunit            |
| TGME49_247280 | -2.26 | 5.61 | 0.00029503  | 0.001155429 | hypothetical protein                                    |
| TGME49_207665 | -8.04 | 4.98 | 0.000294889 | 0.001155429 | kinesin motor domain-containing protein                 |
| TGME49_254800 | 1.43  | 5.35 | 0.000297004 | 0.001161931 | hypothetical protein                                    |
| TGME49_262880 | -1.55 | 6.33 | 0.000297669 | 0.001163915 | hypothetical protein                                    |
| TGME49_227860 | -8.00 | 4.75 | 0.000301027 | 0.001175802 | hypothetical protein                                    |
| TGME49_235960 | -8.01 | 4.72 | 0.000302843 | 0.00118227  | hypothetical protein                                    |
| TGME49_221610 | -1.91 | 6.25 | 0.000304127 | 0.001185406 | ubiquitin carboxyl-terminal hydrolase                   |
| TGME49_286090 | 1.08  | 9.78 | 0.000307256 | 0.001196971 | translation initiation factor SUI1, putative            |
| TGME49_320090 | -2.20 | 6.48 | 0.000308109 | 0.001199663 | hypothetical protein                                    |
| TGME49_230500 | -3.30 | 5.36 | 0.000309171 | 0.001203163 | hypothetical protein                                    |
| TGME49_266110 | 1.44  | 5.29 | 0.000313903 | 0.001220292 | DEAD/DEAH box helicase domain-containing protein        |
| TGME49_243200 | -1.33 | 9.17 | 0.000314283 | 0.001221127 | hypothetical protein                                    |
| TGME49_236780 | -3.31 | 5.28 | 0.000314748 | 0.001222294 | zinc finger, C3HC4 type (RING finger) domain-containing |
| TGME49_311220 | -1.94 | 6.31 | 0.000315309 | 0.001223828 | hypothetical protein                                    |
| TGME49_222240 | -1.27 | 6.92 | 0.00031577  | 0.001224974 | hypothetical protein                                    |
| TGME49_219850 | -1.48 | 8.47 | 0.000316387 | 0.001226725 | prolyl-tRNA synthetase (ProRS)                          |
| TGME49_206415 | -1.42 | 6.70 | 0.00031863  | 0.001234775 | myosin K                                                |

|               |       |       |             |             |                                                         |
|---------------|-------|-------|-------------|-------------|---------------------------------------------------------|
| TGME49_287480 | 1.55  | 8.12  | 0.000323223 | 0.001250943 | hypothetical protein                                    |
| TGME49_309920 | -3.29 | 5.24  | 0.000324698 | 0.001255659 | hypothetical protein                                    |
| TGME49_255660 | -1.64 | 6.24  | 0.000325259 | 0.001257168 | EF hand domain-containing protein                       |
| TGME49_214830 | -3.30 | 5.63  | 0.000326455 | 0.001261132 | hypothetical protein                                    |
| TGME49_311280 | -7.97 | 4.70  | 0.000329006 | 0.001269661 | hypothetical protein                                    |
| TGME49_269130 | -7.97 | 4.83  | 0.000329566 | 0.001271159 | hypothetical protein                                    |
| TGME49_270450 | -7.98 | 4.74  | 0.000333239 | 0.001283988 | MCM2/3/5 family protein                                 |
| TGME49_318590 | -8.02 | 4.79  | 0.000333959 | 0.001285421 | MRP family domain-containing protein                    |
| TGME49_310300 | -2.62 | 5.65  | 0.000334471 | 0.001286723 | hypothetical protein                                    |
| TGME49_277680 | -1.63 | 6.15  | 0.000334854 | 0.001287523 | hypothetical protein                                    |
| TGME49_249702 | -2.29 | 5.88  | 0.000335197 | 0.001288174 | MC family transporter, putative                         |
| TGME49_304670 | -1.33 | 6.12  | 0.000337518 | 0.001295747 | leucine rich repeat-containing protein                  |
| TGME49_238170 | 1.11  | 6.42  | 0.000337973 | 0.001296146 | hypothetical protein                                    |
| TGME49_209170 | -1.29 | 6.83  | 0.000337919 | 0.001296146 | hypothetical protein                                    |
| TGME49_202480 | -3.28 | 5.11  | 0.000344467 | 0.001319685 | hypothetical protein                                    |
| TGME49_278960 | -1.55 | 6.55  | 0.000347103 | 0.001329095 | hypothetical protein                                    |
| TGME49_232680 | 1.15  | 6.24  | 0.000352293 | 0.001345484 | hypothetical protein                                    |
| TGME49_278930 | -1.65 | 6.40  | 0.000354291 | 0.001351925 | Tubulin-tyrosine ligase family protein                  |
| TGME49_220440 | -2.07 | 5.93  | 0.000354345 | 0.001351925 | cyclin-dependent kinase regulatory subunit protein      |
| TGME49_228720 | -7.96 | 4.72  | 0.000354811 | 0.001353001 | hypothetical protein                                    |
| TGME49_211020 | -1.86 | 5.85  | 0.000356883 | 0.001360204 | RNA recognition motif-containing protein                |
| TGME49_293050 | -2.64 | 5.54  | 0.000357816 | 0.001363055 | sybindin family protein                                 |
| TGME49_204060 | -2.62 | 5.60  | 0.000358235 | 0.001363951 | SNARE domain-containing protein                         |
| TGME49_270760 | -7.99 | 4.79  | 0.000365189 | 0.001388282 | asparagine synthase                                     |
| TGME49_208990 | 1.48  | 5.29  | 0.000367232 | 0.001394613 | hypothetical protein                                    |
| TGME49_264820 | 1.45  | 6.38  | 0.000368041 | 0.001395338 | RbAp48                                                  |
| TGME49_283790 | -1.31 | 7.20  | 0.000368071 | 0.001395338 | protein kinase, putative                                |
| TGME49_221922 | -3.32 | 5.27  | 0.000368366 | 0.001395338 | NifU family domain-containing protein                   |
| TGME49_209460 | -7.97 | 4.82  | 0.000368108 | 0.001395338 | hypothetical protein                                    |
| TGME49_257150 | -2.60 | 5.49  | 0.000369441 | 0.001398693 | NOT2 / NOT3 / NOT5 family protein                       |
| TGME49_320005 | -3.28 | 5.20  | 0.000371246 | 0.001404808 | hypothetical protein                                    |
| TGME49_268000 | -2.63 | 5.44  | 0.000372304 | 0.001407369 | hypothetical protein                                    |
| TGME49_285520 | -3.31 | 5.20  | 0.000373695 | 0.001411905 | RNA cap guanine-N2 methyltransferase                    |
| TGME49_258980 | -2.00 | 5.62  | 0.00037694  | 0.001422713 | hypothetical protein                                    |
| TGME49_288720 | -1.43 | 9.52  | 0.000378282 | 0.001427048 | ribosomal protein RPL10                                 |
| TGME49_264450 | -2.01 | 5.87  | 0.000382087 | 0.001439933 | DNA topoisomerase III beta-1, putative                  |
| TGME49_275780 | -7.94 | 4.85  | 0.000383791 | 0.001444883 | hypothetical protein                                    |
| TGME49_271170 | -3.28 | 5.26  | 0.000384555 | 0.001447022 | dolichol kinase                                         |
| TGME49_308090 | 1.26  | 10.07 | 0.000385027 | 0.001447705 | rhoptry protein ROP5                                    |
| TGME49_255300 | -1.56 | 6.62  | 0.000385128 | 0.001447705 | hypothetical protein                                    |
| TGME49_209150 | -1.16 | 6.92  | 0.00038583  | 0.001448872 | non-proton pumping type-II NADH dehydrogenase I         |
| TGME49_278700 | -2.60 | 5.93  | 0.000388996 | 0.001459278 | hypothetical protein                                    |
| TGME49_309100 | 1.77  | 5.47  | 0.000389436 | 0.001460189 | hypothetical protein                                    |
| TGME49_283820 | 1.31  | 5.91  | 0.000390448 | 0.001463241 | glycine cleavage T-protein (aminomethyl transferase) do |
| TGME49_215550 | -2.32 | 5.78  | 0.000391785 | 0.001467506 | hypothetical protein                                    |
| TGME49_277220 | 1.36  | 5.47  | 0.000401029 | 0.001498337 | hypothetical protein                                    |
| TGME49_271440 | -2.60 | 5.43  | 0.000400913 | 0.001498337 | NPL4 family protein                                     |
| TGME49_246630 | -1.70 | 5.95  | 0.000413037 | 0.001541642 | DNA-directed RNA polymerase I RPA43                     |
| TGME49_205720 | -7.98 | 4.68  | 0.000413403 | 0.001542229 | Adenosine/AMP deaminase domain-containing protein       |
| TGME49_318480 | -2.01 | 6.16  | 0.000415858 | 0.001550607 | SWI2/SNF2-containing protein RAD5                       |
| TGME49_216910 | 1.30  | 6.28  | 0.000416374 | 0.001551747 | hypothetical protein                                    |
| TGME49_305800 | -1.83 | 5.93  | 0.000419267 | 0.001561743 | 6-pyruvoyl tetrahydrobiopterin synthase                 |
| TGME49_258990 | -2.61 | 5.52  | 0.000428613 | 0.001595753 | bromodomain-containing protein                          |
| TGME49_313860 | 1.64  | 7.16  | 0.000439934 | 0.001636253 | regulator of chromosome condensation (RCC1) repeat-c    |
| TGME49_223640 | -7.99 | 5.20  | 0.000442061 | 0.001643338 | hypothetical protein                                    |
| TGME49_212800 | -1.48 | 6.53  | 0.000444921 | 0.00165148  | hypothetical protein                                    |
| TGME49_260420 | -1.69 | 6.17  | 0.000445595 | 0.001653151 | HEC/Ndc80p family protein                               |

|               |       |      |             |             |                                                           |
|---------------|-------|------|-------------|-------------|-----------------------------------------------------------|
| TGME49_267760 | -1.87 | 5.83 | 0.000448967 | 0.001663156 | hypothetical protein                                      |
| TGME49_213420 | -7.90 | 4.75 | 0.00046009  | 0.001703508 | RAP domain-containing protein                             |
| TGME49_312820 | -1.86 | 5.76 | 0.000461569 | 0.00170813  | hypothetical protein                                      |
| TGME49_214800 | -7.90 | 4.74 | 0.000465179 | 0.001719765 | hypothetical protein                                      |
| TGME49_242810 | -3.27 | 5.22 | 0.000466716 | 0.001724587 | hypothetical protein                                      |
| TGME49_226330 | -7.92 | 4.87 | 0.000472278 | 0.001741657 | hypothetical protein                                      |
| TGME49_315670 | -1.26 | 6.74 | 0.000472559 | 0.001741825 | HEAT repeat-containing protein                            |
| TGME49_209950 | -1.25 | 9.03 | 0.000474064 | 0.001745634 | thioredoxin, putative                                     |
| TGME49_252320 | -7.92 | 5.00 | 0.000477266 | 0.001756549 | Sas10/Utp3/C1D family protein                             |
| TGME49_221710 | -2.21 | 5.92 | 0.000479081 | 0.001762351 | TBC domain-containing protein                             |
| TGME49_286480 | 1.10  | 6.47 | 0.000480732 | 0.001767543 | hypothetical protein                                      |
| TGME49_228320 | -7.90 | 4.69 | 0.000483099 | 0.001775366 | hypothetical protein                                      |
| TGME49_220208 | -7.90 | 4.78 | 0.000485104 | 0.001781846 | hypothetical protein                                      |
| TGME49_244440 | -1.06 | 8.78 | 0.00048867  | 0.001793166 | nucleoside transporter protein                            |
| TGME49_288860 | -2.93 | 6.98 | 0.000489497 | 0.001794968 | RuvB family 2 protein                                     |
| TGME49_270160 | -7.88 | 4.78 | 0.000489647 | 0.001794968 | hypothetical protein                                      |
| TGME49_215360 | 1.59  | 5.74 | 0.000490001 | 0.001795263 | hypothetical protein                                      |
| TGME49_223125 | -1.82 | 6.12 | 0.000495147 | 0.001811537 | ubiquitin family protein                                  |
| TGME49_293650 | 1.82  | 5.03 | 0.000496326 | 0.001814953 | hypothetical protein                                      |
| TGME49_262550 | -7.88 | 4.87 | 0.00049744  | 0.001818128 | hypothetical protein                                      |
| TGME49_318730 | -1.30 | 6.68 | 0.000510787 | 0.001864146 | glycosyl transferase                                      |
| TGME49_306950 | -8.04 | 4.67 | 0.000515088 | 0.001877989 | RAP domain-containing protein                             |
| TGME49_223672 | 1.31  | 5.57 | 0.000517759 | 0.001885867 | 3'(2'),5'-biphosphate nucleotidase                        |
| TGME49_312480 | 1.19  | 6.37 | 0.000521321 | 0.001896974 | uracil phosphoribosyltransferase FUR1, putative           |
| TGME49_314295 | -3.23 | 4.70 | 0.000521153 | 0.001896974 | ribosomal l25 family protein                              |
| TGME49_288045 | -3.28 | 5.31 | 0.000522446 | 0.001900131 | hypothetical protein                                      |
| TGME49_288840 | 1.69  | 7.58 | 0.000528515 | 0.001920313 | hypothetical protein                                      |
| TGME49_214470 | -2.19 | 5.61 | 0.000528827 | 0.001920503 | Ulp1 protease family, C-terminal catalytic domain-conta   |
| TGME49_294860 | -1.68 | 6.13 | 0.000530747 | 0.001926531 | hypothetical protein                                      |
| TGME49_246020 | -1.58 | 6.19 | 0.00053429  | 0.001938439 | SprT domain-containing protein                            |
| TGME49_311625 | -1.97 | 5.92 | 0.000535143 | 0.001940583 | WD domain, G-beta repeat-containing protein               |
| TGME49_257595 | -2.65 | 5.61 | 0.000536982 | 0.001946297 | hypothetical protein                                      |
| TGME49_264190 | -2.55 | 5.48 | 0.000537533 | 0.001947339 | hypothetical protein                                      |
| TGME49_215380 | -3.25 | 5.25 | 0.000541669 | 0.001959443 | hypothetical protein                                      |
| TGME49_235730 | 1.57  | 5.14 | 0.000549242 | 0.001985867 | hypothetical protein                                      |
| TGME49_236840 | -1.26 | 6.61 | 0.00055113  | 0.001990745 | zinc finger (C-x8-C-x5-C-x3-H)-2, putative                |
| TGME49_318300 | -2.54 | 5.50 | 0.000554219 | 0.002000927 | hypothetical protein                                      |
| TGME49_235680 | -1.51 | 7.23 | 0.000559823 | 0.00202017  | peptidase M16 inactive domain-containing protein          |
| TGME49_219170 | -1.51 | 6.59 | 0.00056134  | 0.002023027 | hypothetical protein                                      |
| TGME49_285810 | -7.85 | 4.79 | 0.000561435 | 0.002023027 | MYND finger domain-containing protein                     |
| TGME49_202430 | 1.22  | 6.35 | 0.000565319 | 0.00203504  | hypothetical protein                                      |
| TGME49_289890 | -2.64 | 5.61 | 0.000567043 | 0.002040253 | hypothetical protein                                      |
| TGME49_251890 | -3.22 | 5.68 | 0.000568029 | 0.002042805 | hypothetical protein                                      |
| TGME49_264440 | -1.69 | 6.16 | 0.000569565 | 0.002047094 | signal recognition particle receptor beta subunit protein |
| TGME49_320460 | -3.20 | 5.29 | 0.000569956 | 0.002047094 | ABC transporter transmembrane region domain-contain       |
| TGME49_321610 | -7.86 | 4.89 | 0.000570259 | 0.002047094 | hypothetical protein                                      |
| TGME49_307010 | 1.54  | 6.89 | 0.00057146  | 0.002048287 | histone lysine demethylase JMJC1/KDM5D/JARID1D            |
| TGME49_240700 | -1.67 | 5.96 | 0.000570955 | 0.002048287 | ubiquitin family protein                                  |
| TGME49_271860 | -7.92 | 4.88 | 0.000571493 | 0.002048287 | tRNA (Uracil-5-)-methyltransferase                        |
| TGME49_278780 | -1.56 | 6.27 | 0.000577678 | 0.002068451 | hypothetical protein                                      |
| TGME49_282130 | -2.19 | 5.72 | 0.000580818 | 0.002078687 | hypothetical protein                                      |
| TGME49_252270 | 1.90  | 6.10 | 0.000586955 | 0.002098619 | L1P family of ribosomal protein                           |
| TGME49_281630 | -1.30 | 6.44 | 0.000588628 | 0.002103391 | hydroxyacylglutathione hydrolase                          |
| TGME49_219460 | -2.53 | 5.68 | 0.000588858 | 0.002103391 | hypothetical protein                                      |
| TGME49_229790 | -1.96 | 5.71 | 0.000589762 | 0.002105601 | hypothetical protein                                      |
| TGME49_313970 | -2.25 | 5.45 | 0.000590093 | 0.002105766 | Phytanoyl-CoA dioxygenase (PhyH) superfamily protein      |
| TGME49_214280 | -7.97 | 4.76 | 0.000591476 | 0.002109683 | phosphoadenosine phosphosulfate reductase family pro      |

|               |       |       |             |             |                                                          |
|---------------|-------|-------|-------------|-------------|----------------------------------------------------------|
| TGME49_227430 | 2.34  | 6.17  | 0.00059333  | 0.002111698 | transmembrane amino acid transporter protein             |
| TGME49_260520 | 1.26  | 7.70  | 0.00059404  | 0.002111698 | hypothetical protein                                     |
| TGME49_310730 | -1.36 | 6.50  | 0.000593945 | 0.002111698 | hypothetical protein                                     |
| TGME49_314840 | -1.49 | 6.47  | 0.000593145 | 0.002111698 | ubiquitin carboxyl-terminal hydrolase                    |
| TGME49_212940 | -7.86 | 5.88  | 0.00059393  | 0.002111698 | hypothetical protein                                     |
| TGME49_286180 | -7.84 | 4.90  | 0.000594962 | 0.002113959 | tRNA ligases class I (M) protein                         |
| TGME49_268870 | -1.08 | 7.46  | 0.000596709 | 0.002119149 | tetratricopeptide repeat-containing protein              |
| TGME49_267400 | -1.28 | 9.30  | 0.000597264 | 0.002120102 | ribosomal protein RPL32                                  |
| TGME49_226900 | 1.11  | 6.03  | 0.000599553 | 0.002127204 | hypothetical protein                                     |
| TGME49_235610 | -3.19 | 5.08  | 0.000601942 | 0.002134658 | ATPase, AAA family protein                               |
| TGME49_290990 | 1.02  | 6.58  | 0.000607624 | 0.002153773 | HEAT repeat-containing protein                           |
| TGME49_265400 | -1.46 | 6.69  | 0.000609775 | 0.002159329 | hypothetical protein                                     |
| TGME49_243390 | -2.56 | 5.53  | 0.000610555 | 0.002161054 | hypothetical protein                                     |
| TGME49_258180 | -7.91 | 4.82  | 0.000611383 | 0.002162951 | hypothetical protein                                     |
| TGME49_289720 | -1.57 | 6.27  | 0.000613703 | 0.00217012  | hypothetical protein                                     |
| TGME49_233860 | -7.90 | 4.93  | 0.000615334 | 0.002174847 | DALR anticodon binding domain-containing protein         |
| TGME49_237110 | -1.56 | 6.30  | 0.000618717 | 0.002184716 | replication factor C subunit 2, putative                 |
| TGME49_202950 | -1.07 | 7.30  | 0.000620432 | 0.002188679 | hypothetical protein                                     |
| TGME49_248130 | -7.87 | 4.76  | 0.000621962 | 0.00219303  | hypothetical protein                                     |
| TGME49_300380 | -2.52 | 5.70  | 0.000625513 | 0.002204502 | endoplasmic reticulum oxidoreductin, putative            |
| TGME49_270330 | 1.39  | 6.26  | 0.000627878 | 0.002211782 | cell-cycle-associated protein kinase, putative           |
| TGME49_212200 | 1.28  | 6.03  | 0.000639522 | 0.002247447 | hypothetical protein                                     |
| TGME49_248370 | 1.12  | 5.93  | 0.000639284 | 0.002247447 | prefoldin subunit 6, putative                            |
| TGME49_254200 | -7.85 | 4.78  | 0.00064812  | 0.002272262 | anticodon binding domain-containing protein              |
| TGME49_271430 | -3.18 | 5.38  | 0.000650132 | 0.002278234 | hypothetical protein                                     |
| TGME49_289190 | -7.82 | 4.82  | 0.00065258  | 0.00228573  | tetratricopeptide repeat-containing protein              |
| TGME49_275470 | 1.49  | 5.71  | 0.000653501 | 0.002287873 | dense granule protein GRA15                              |
| TGME49_240450 | 1.81  | 5.84  | 0.00066059  | 0.002307227 | Maf family protein                                       |
| TGME49_218800 | -7.86 | 4.77  | 0.000670694 | 0.002339205 | hypothetical protein                                     |
| TGME49_224090 | -1.96 | 5.72  | 0.000680651 | 0.002366489 | enoyl-CoA hydratase/isomerase family protein             |
| TGME49_250500 | -3.24 | 5.36  | 0.000690239 | 0.00239607  | hypothetical protein                                     |
| TGME49_238510 | -2.21 | 5.29  | 0.000692396 | 0.002402428 | hypothetical protein                                     |
| TGME49_310770 | -1.46 | 6.43  | 0.000695442 | 0.002411866 | hypothetical protein                                     |
| TGME49_306540 | 1.19  | 5.76  | 0.000704317 | 0.002440148 | phosphotransferase enzyme family protein                 |
| TGME49_285272 | -7.86 | 4.73  | 0.000704587 | 0.002440148 | hypothetical protein                                     |
| TGME49_226320 | 1.17  | 6.83  | 0.000717106 | 0.002477701 | hypothetical protein                                     |
| TGME49_244250 | -1.08 | 8.20  | 0.000719875 | 0.002486108 | hypothetical protein                                     |
| TGME49_254890 | 1.60  | 5.23  | 0.000729626 | 0.00251391  | hypothetical protein                                     |
| TGME49_221950 | -1.25 | 6.81  | 0.00072932  | 0.00251391  | spliceosome-associated protein, putative                 |
| TGME49_272390 | -7.80 | 5.13  | 0.00073573  | 0.002531404 | hypothetical protein                                     |
| TGME49_249850 | -1.83 | 10.25 | 0.000741896 | 0.002549063 | GAP40 protein                                            |
| TGME49_252220 | -1.20 | 7.73  | 0.000749732 | 0.00257479  | tetratricopeptide repeat domain containing protein       |
| TGME49_226790 | 1.95  | 6.23  | 0.000750199 | 0.002575195 | ABC transporter, ATP-binding domain-containing protein   |
| TGME49_214380 | 1.30  | 5.41  | 0.000757671 | 0.002598431 | hypothetical protein                                     |
| TGME49_262130 | -1.55 | 6.15  | 0.000765562 | 0.00262306  | hypothetical protein                                     |
| TGME49_229940 | -2.14 | 5.72  | 0.000766354 | 0.002624527 | cyclophilin, putative                                    |
| TGME49_315640 | 1.35  | 5.20  | 0.000768528 | 0.002627137 | lipoyl(octanoyl) transferase                             |
| TGME49_201670 | 1.33  | 5.84  | 0.000767916 | 0.002627137 | DnaJ domain-containing protein                           |
| TGME49_211230 | -1.32 | 6.73  | 0.000769879 | 0.002629323 | eukaryotic initiation factor-2B, alpha subunit, putative |
| TGME49_267040 | -2.52 | 5.35  | 0.00077127  | 0.002632857 | hypothetical protein                                     |
| TGME49_280450 | -7.80 | 4.79  | 0.000786559 | 0.002678867 | hypothetical protein                                     |
| TGME49_226060 | 1.29  | 6.99  | 0.000787337 | 0.002680282 | transmembrane amino acid transporter protein             |
| TGME49_247610 | 1.39  | 5.08  | 0.000794678 | 0.002702783 | small nuclear ribonucleoprotein E, putative              |
| TGME49_276170 | 1.24  | 9.19  | 0.000794374 | 0.002702783 | phosphatidylinositol 3- and 4-kinase                     |
| TGME49_267120 | -2.50 | 5.47  | 0.000797828 | 0.002712247 | hypothetical protein                                     |
| TGME49_230080 | -2.14 | 5.55  | 0.000814157 | 0.002765217 | DEAD/DEAH box helicase domain-containing protein         |
| TGME49_210840 | -1.09 | 6.95  | 0.000817906 | 0.002776674 | arginyl-tRNA synthetase family protein                   |

|               |       |      |             |             |                                                            |
|---------------|-------|------|-------------|-------------|------------------------------------------------------------|
| TGME49_222920 | -1.76 | 6.07 | 0.000823867 | 0.002793063 | mbp-1 interacting protein-2a family protein                |
| TGME49_205570 | -2.49 | 5.58 | 0.000825934 | 0.002798787 | hypothetical protein                                       |
| TGME49_220520 | 1.04  | 6.81 | 0.000828559 | 0.002806396 | hypothetical protein                                       |
| TGME49_246178 | -1.91 | 5.82 | 0.000839148 | 0.002839663 | hypothetical protein                                       |
| TGME49_222910 | -1.38 | 6.45 | 0.000841033 | 0.002844739 | phosphoglycerate mutase                                    |
| TGME49_212930 | 1.87  | 5.60 | 0.000845792 | 0.002858222 | NifU family domain-containing protein                      |
| TGME49_203420 | 1.62  | 5.22 | 0.000848119 | 0.002863465 | 4'-phosphopantetheinyl transferase domain-containing       |
| TGME49_244860 | 1.42  | 5.15 | 0.000847992 | 0.002863465 | hypothetical protein                                       |
| TGME49_234300 | 1.07  | 6.14 | 0.000849148 | 0.002865633 | hypothetical protein                                       |
| TGME49_289140 | 1.10  | 6.44 | 0.000872568 | 0.002939301 | ribosomal protein l22/l43, putative                        |
| TGME49_253540 | 1.31  | 5.28 | 0.000876908 | 0.002952576 | hypothetical protein                                       |
| TGME49_289100 | -1.59 | 6.51 | 0.000878619 | 0.002955644 | hypothetical protein                                       |
| TGME49_281920 | -1.32 | 6.37 | 0.00087955  | 0.002957432 | V-type ATPase, D subunit protein                           |
| TGME49_218950 | 1.33  | 5.47 | 0.000894796 | 0.003005961 | hypothetical protein                                       |
| TGME49_321300 | -3.13 | 5.37 | 0.000895467 | 0.003006849 | autophagy-related 12 variant 1, putative                   |
| TGME49_295060 | -7.75 | 4.82 | 0.000898982 | 0.003015913 | exonuclease                                                |
| TGME49_222120 | -3.12 | 5.09 | 0.00090027  | 0.003017839 | hypothetical protein                                       |
| TGME49_265650 | -3.16 | 5.20 | 0.00090078  | 0.003017839 | protein phosphatase 2C domain-containing protein           |
| TGME49_263410 | 4.20  | 5.00 | 0.000917539 | 0.003069811 | scavenger receptor cysteine-rich domain-containing protein |
| TGME49_276190 | -2.20 | 5.61 | 0.00093748  | 0.003130862 | hypothetical protein                                       |
| TGME49_246000 | 1.66  | 4.76 | 0.000944374 | 0.00315246  | large subunit ribosomal protein IMG2                       |
| TGME49_217880 | -7.75 | 4.80 | 0.000950006 | 0.003169253 | RNA-binding protein Nova-1, putative                       |
| TGME49_295960 | 1.15  | 7.35 | 0.000951924 | 0.003171936 | hypothetical protein                                       |
| TGME49_224350 | -1.28 | 8.79 | 0.00095179  | 0.003171936 | aminopeptidase N, putative                                 |
| TGME49_263505 | -3.14 | 5.15 | 0.00095295  | 0.003172495 | hypothetical protein                                       |
| TGME49_297270 | -2.48 | 5.28 | 0.000961931 | 0.003200954 | hypothetical protein                                       |
| TGME49_315360 | -1.35 | 6.61 | 0.000963503 | 0.003204742 | hypothetical protein                                       |
| TGME49_224670 | -1.89 | 5.88 | 0.00096521  | 0.003208975 | DnaJ domain-containing protein                             |
| TGME49_245590 | 1.27  | 5.36 | 0.000968408 | 0.003217131 | rhomboid protease ROM6                                     |
| TGME49_310630 | -1.27 | 6.41 | 0.000968533 | 0.003217131 | hypothetical protein                                       |
| TGME49_257060 | -2.12 | 5.49 | 0.000970221 | 0.003219846 | translation initiation factor sui1 protein                 |
| TGME49_312310 | -2.50 | 5.42 | 0.000969892 | 0.003219846 | ATPase, AAA family protein                                 |
| TGME49_226740 | 1.06  | 7.97 | 0.000981739 | 0.003253998 | zinc finger, C3HC4 type (RING finger) domain-containing    |
| TGME49_203620 | -3.12 | 5.21 | 0.000981833 | 0.003253998 | hypothetical protein                                       |
| TGME49_320015 | -7.73 | 4.68 | 0.000982929 | 0.003256172 | hypothetical protein                                       |
| TGME49_217900 | -1.50 | 6.15 | 0.000990102 | 0.003276999 | hypothetical protein                                       |
| TGME49_229450 | -1.76 | 5.88 | 0.000993743 | 0.003286764 | hypothetical protein                                       |
| TGME49_253020 | -2.14 | 6.02 | 0.000993942 | 0.003286764 | hypothetical protein                                       |
| TGME49_301350 | -7.79 | 4.95 | 0.000997033 | 0.003295514 | SNARE associated protein                                   |
| TGME49_245475 | 1.32  | 5.26 | 0.000998745 | 0.003298223 | hypothetical protein                                       |
| TGME49_226000 | -1.08 | 7.07 | 0.00100035  | 0.003302049 | ATP synthase, putative                                     |
| TGME49_295610 | -1.06 | 7.21 | 0.001004683 | 0.003313393 | histone lysine methyltransferase, SET, putative            |
| TGME49_277710 | -1.23 | 6.64 | 0.00100666  | 0.003316952 | hypothetical protein                                       |
| TGME49_294812 | -3.12 | 5.19 | 0.001020245 | 0.003358724 | RNA recognition motif-containing protein                   |
| TGME49_237870 | -3.13 | 4.91 | 0.001024523 | 0.003368309 | FYVE zinc finger domain-containing protein                 |
| TGME49_315980 | -2.11 | 5.45 | 0.00102677  | 0.003374195 | EREBP-4 family protein                                     |
| TGME49_219300 | 1.11  | 5.66 | 0.001034394 | 0.003391711 | ran binding protein                                        |
| TGME49_227260 | -2.49 | 5.33 | 0.001034072 | 0.003391711 | RIO1 family protein                                        |
| TGME49_255690 | -2.46 | 5.59 | 0.001046326 | 0.003423245 | 2-C-methyl-D-erythritol 2,4-cyclodiphosphate synthase      |
| TGME49_272270 | -7.71 | 4.79 | 0.001046194 | 0.003423245 | radical SAM domain-containing protein                      |
| TGME49_260650 | -3.12 | 5.40 | 0.001056956 | 0.003456495 | glycosyltransferase, group 2 family protein                |
| TGME49_273970 | -3.09 | 5.02 | 0.001060796 | 0.003467519 | CorA family Mg <sup>2+</sup> transporter protein           |
| TGME49_226840 | -2.45 | 5.41 | 0.00106623  | 0.00348374  | hypothetical protein                                       |
| TGME49_275350 | -1.73 | 6.21 | 0.001083741 | 0.003536267 | TBC domain-containing protein                              |
| TGME49_250680 | -2.09 | 5.77 | 0.001088171 | 0.003549155 | TBC domain-containing kinase (incomplete catalytic triad)  |
| TGME49_216260 | -1.03 | 7.05 | 0.001090802 | 0.003553963 | eukaryotic initiation factor-2B, gamma subunit, putative   |
| TGME49_287470 | -1.60 | 5.53 | 0.001090609 | 0.003553963 | hypothetical protein                                       |

|               |       |      |             |             |                                                           |
|---------------|-------|------|-------------|-------------|-----------------------------------------------------------|
| TGME49_249190 | 1.62  | 5.13 | 0.001093407 | 0.003559951 | AP2 domain transcription factor AP2XII-6                  |
| TGME49_270190 | -2.57 | 5.63 | 0.001095701 | 0.003565851 | protein phosphatase 2C domain-containing protein          |
| TGME49_291690 | -3.09 | 5.09 | 0.001102163 | 0.003585302 | hypothetical protein                                      |
| TGME49_319920 | -1.01 | 7.48 | 0.001110449 | 0.003610667 | 2-oxo acid dehydrogenases acyltransferase (catalytic do   |
| TGME49_306195 | 2.44  | 5.14 | 0.001133504 | 0.003675933 | hypothetical protein                                      |
| TGME49_268620 | -7.69 | 4.67 | 0.001132899 | 0.003675933 | blood stage antigen 41-3 precursor, putative              |
| TGME49_276900 | -3.11 | 5.41 | 0.00113542  | 0.003680534 | hypothetical protein                                      |
| TGME49_236140 | 1.53  | 4.81 | 0.001148368 | 0.003711115 | hypothetical protein                                      |
| TGME49_316250 | 1.34  | 8.50 | 0.001150993 | 0.003717975 | hypothetical protein                                      |
| TGME49_304460 | -1.05 | 7.52 | 0.001159832 | 0.003741797 | zinc finger, C3HC4 type (RING finger) domain-containing   |
| TGME49_318460 | -1.35 | 6.53 | 0.001159886 | 0.003741797 | P-type ATPase of unknown pump specificity (type V) pro    |
| TGME49_210380 | -1.26 | 6.73 | 0.001165867 | 0.00375945  | hypothetical protein                                      |
| TGME49_205730 | -2.44 | 5.43 | 0.001171569 | 0.003776191 | hypothetical protein                                      |
| TGME49_290630 | 1.17  | 5.90 | 0.001173939 | 0.003778888 | AP2 domain transcription factor AP2IX-7                   |
| TGME49_255670 | -3.09 | 4.91 | 0.001178479 | 0.003785262 | methyltransferase domain-containing protein               |
| TGME49_214500 | 1.38  | 6.17 | 0.001179132 | 0.003785715 | ankyrin repeat-containing protein                         |
| TGME49_240830 | -7.68 | 4.70 | 0.001181462 | 0.003788793 | hydrolase, alpha/beta fold family protein                 |
| TGME49_209140 | -1.18 | 6.82 | 0.001185349 | 0.003799078 | anti-silencing protein, ASF1 family protein               |
| TGME49_210360 | 1.47  | 6.68 | 0.001187161 | 0.003803236 | DEAD (Asp-Glu-Ala-Asp) box polypeptide 41 family prote    |
| TGME49_203160 | 1.08  | 6.00 | 0.00122575  | 0.003921763 | hypothetical protein                                      |
| TGME49_294360 | -1.28 | 6.51 | 0.001229149 | 0.003930936 | ubiquitin specific protease 39 isoform 2, putative        |
| TGME49_204270 | -1.92 | 6.05 | 0.001230056 | 0.003932137 | hypothetical protein                                      |
| TGME49_204140 | -7.74 | 4.77 | 0.001231177 | 0.003934021 | PHD-finger domain-containing protein                      |
| TGME49_313570 | -1.33 | 6.48 | 0.001236244 | 0.003946798 | regulator of chromosome condensation (RCC1) repeat-c      |
| TGME49_235420 | -1.03 | 7.24 | 0.001242357 | 0.003962895 | hypothetical protein                                      |
| TGME49_259230 | -2.45 | 5.32 | 0.001251458 | 0.003990204 | site-specific recombinase, phage integrase family protein |
| TGME49_285660 | -1.93 | 5.85 | 0.001253272 | 0.003994264 | DEAD/DEAH box helicase domain-containing protein          |
| TGME49_301300 | -7.66 | 4.71 | 0.00128883  | 0.004095234 | hypothetical protein                                      |
| TGME49_215940 | -1.37 | 6.63 | 0.001290167 | 0.004097722 | Acetyl-coenzyme A transporter, putative                   |
| TGME49_231920 | 1.51  | 6.14 | 0.001305239 | 0.004142032 | oxidoreductase, short chain dehydrogenase/reductase f     |
| TGME49_269800 | -2.08 | 5.58 | 0.001309699 | 0.004154224 | glutamine-dependent NAD(+) synthetase protein, putati     |
| TGME49_254365 | -1.17 | 7.32 | 0.001323288 | 0.004186731 | phosphatidate cytidyltransferase                          |
| TGME49_263530 | -1.36 | 6.47 | 0.001322745 | 0.004186731 | chaperonin , putative                                     |
| TGME49_221360 | -1.89 | 5.89 | 0.001322528 | 0.004186731 | hypothetical protein                                      |
| TGME49_287980 | -1.58 | 6.10 | 0.001336699 | 0.004225547 | FHA domain-containing protein                             |
| TGME49_281450 | -2.46 | 5.45 | 0.001341632 | 0.004239327 | cell-cycle-associated protein kinase, putative            |
| TGME49_213020 | 1.68  | 5.21 | 0.001349232 | 0.004261522 | hypothetical protein                                      |
| TGME49_258080 | -1.75 | 5.91 | 0.001352458 | 0.004269888 | hypothetical protein                                      |
| TGME49_246780 | -7.65 | 4.74 | 0.001361979 | 0.004298111 | hypothetical protein                                      |
| TGME49_269630 | 1.47  | 5.06 | 0.001367647 | 0.004314158 | hypothetical protein                                      |
| TGME49_246530 | -3.15 | 5.27 | 0.001376932 | 0.004341594 | phospholipase D active site domain-containing protein     |
| TGME49_251480 | 1.76  | 5.55 | 0.001382969 | 0.004356912 | DEAD/DEAH box helicase domain-containing protein          |
| TGME49_290960 | -1.21 | 6.72 | 0.001387075 | 0.004364268 | pyruvate phosphate dikinase, pep/pyruvate binding dom     |
| TGME49_262030 | -7.63 | 4.93 | 0.001386958 | 0.004364268 | ALG6, ALG8 glycosyltransferase family protein             |
| TGME49_255930 | 1.41  | 5.46 | 0.001392477 | 0.004379402 | hypothetical protein                                      |
| TGME49_278230 | -3.05 | 5.10 | 0.001401203 | 0.004399361 | prenyltransferase and squalene oxidase repeat-containi    |
| TGME49_252190 | 1.56  | 6.80 | 0.001425631 | 0.004474038 | KRUF family protein                                       |
| TGME49_265380 | -1.86 | 5.88 | 0.001436157 | 0.004501461 | tetratricopeptide repeat (TPR)-/ U-box domain-containi    |
| TGME49_294430 | -3.04 | 5.21 | 0.001436916 | 0.00450193  | hypothetical protein                                      |
| TGME49_203480 | -3.09 | 5.11 | 0.001447385 | 0.004528973 | hypothetical protein                                      |
| TGME49_313960 | -3.09 | 5.10 | 0.001448911 | 0.004529916 | ribosomal protein L19 protein                             |
| TGME49_310210 | 1.01  | 6.10 | 0.001449669 | 0.004530369 | hypothetical protein                                      |
| TGME49_242320 | -1.31 | 6.85 | 0.001462603 | 0.004566928 | B-box zinc finger domain-containing protein               |
| TGME49_266690 | -1.12 | 6.96 | 0.001481238 | 0.004621892 | hypothetical protein                                      |
| TGME49_219260 | -1.05 | 6.99 | 0.001487204 | 0.004637869 | cation-transporting ATPase, putative                      |
| TGME49_273840 | -2.09 | 5.63 | 0.00151589  | 0.004719363 | brix domain-containing protein                            |
| TGME49_244130 | -1.39 | 6.36 | 0.001517217 | 0.004721508 | hypothetical protein                                      |

|               |       |       |             |             |                                                          |
|---------------|-------|-------|-------------|-------------|----------------------------------------------------------|
| TGME49_261030 | -3.23 | 4.80  | 0.001521604 | 0.004733169 | pyridine nucleotide-disulfide oxidoreductase domain-co   |
| TGME49_295850 | -1.01 | 7.27  | 0.001534993 | 0.004772809 | cyclic nucleotide-binding domain-containing protein      |
| TGME49_239080 | -7.62 | 4.71  | 0.001543195 | 0.004794278 | carrier superfamily protein                              |
| TGME49_233760 | -2.10 | 5.69  | 0.00154869  | 0.004809328 | hypothetical protein                                     |
| TGME49_314550 | -2.38 | 4.92  | 0.001556669 | 0.004828024 | hypothetical protein                                     |
| TGME49_258670 | -7.67 | 5.62  | 0.001556321 | 0.004828024 | hypothetical protein                                     |
| TGME49_291350 | -3.06 | 5.02  | 0.001559587 | 0.004835046 | hypothetical protein                                     |
| TGME49_234610 | -1.31 | 6.61  | 0.001581393 | 0.004892392 | WD-40 repeat protein                                     |
| TGME49_284050 | -1.41 | 6.47  | 0.001588482 | 0.004912269 | DEAD/DEAH box helicase domain-containing protein         |
| TGME49_213388 | 1.25  | 5.45  | 0.001590128 | 0.004915303 | hypothetical protein                                     |
| TGME49_269700 | 1.75  | 8.27  | 0.00159665  | 0.004933403 | NLI interacting factor family phosphatase                |
| TGME49_201120 | -1.34 | 6.58  | 0.001606175 | 0.004958689 | ELMO/CED-12 family protein                               |
| TGME49_288640 | 1.49  | 5.01  | 0.001617922 | 0.004988705 | radical SAM domain-containing protein                    |
| TGME49_224740 | 1.13  | 5.80  | 0.001618618 | 0.004988771 | hypothetical protein                                     |
| TGME49_270370 | -2.15 | 5.67  | 0.001629963 | 0.005021644 | clathrin assembly protein AP19, putative                 |
| TGME49_227440 | 1.14  | 5.77  | 0.001633233 | 0.005029622 | WD domain, G-beta repeat-containing protein              |
| TGME49_288210 | 1.19  | 6.24  | 0.001648517 | 0.005074577 | PUL domain-containing protein                            |
| TGME49_297360 | -1.42 | 6.33  | 0.00165056  | 0.005078751 | hypothetical protein                                     |
| TGME49_268240 | 1.64  | 4.85  | 0.00166286  | 0.005108096 | hypothetical protein                                     |
| TGME49_284010 | -3.01 | 5.48  | 0.001672953 | 0.005134834 | 5'-3' exonuclease, N-terminal resolvase family domain-co |
| TGME49_233540 | -3.17 | 5.15  | 0.001677917 | 0.005145799 | transporter, major facilitator family protein            |
| TGME49_315910 | 1.00  | 5.86  | 0.001682735 | 0.005158433 | hypothetical protein                                     |
| TGME49_224980 | -1.23 | 6.48  | 0.00168973  | 0.005175587 | hypothetical protein                                     |
| TGME49_217610 | -1.83 | 5.34  | 0.001695087 | 0.005189843 | hypothetical protein                                     |
| TGME49_209985 | 1.72  | 6.45  | 0.001702261 | 0.00520965  | cAMP-dependent protein kinase                            |
| TGME49_244510 | -7.58 | 4.91  | 0.001703336 | 0.005210784 | AP2 domain transcription factor AP2VI-3                  |
| TGME49_288370 | 1.28  | 5.46  | 0.001712611 | 0.005234828 | hypothetical protein                                     |
| TGME49_221370 | -3.01 | 5.30  | 0.001719179 | 0.005248395 | hypothetical protein                                     |
| TGME49_238000 | -3.04 | 5.17  | 0.00172104  | 0.005251907 | peptidyl-prolyl isomerase                                |
| TGME49_203362 | -3.06 | 4.97  | 0.001721904 | 0.005252376 | hypothetical protein                                     |
| TGME49_317705 | -1.59 | 6.25  | 0.001724241 | 0.005257334 | enoyl-CoA hydratase/isomerase family protein             |
| TGME49_286140 | -1.68 | 5.93  | 0.001730201 | 0.005273333 | hypothetical protein                                     |
| TGME49_218790 | -3.03 | 4.93  | 0.00173619  | 0.005289407 | elongation factor G C-terminus domain-containing prote   |
| TGME49_222870 | -1.41 | 6.27  | 0.001754648 | 0.005339039 | hypothetical protein                                     |
| TGME49_250090 | 1.00  | 6.15  | 0.001755983 | 0.005340903 | hypothetical protein                                     |
| TGME49_294720 | -2.11 | 5.83  | 0.001758178 | 0.005345382 | hypothetical protein                                     |
| TGME49_239050 | 1.05  | 6.44  | 0.00177224  | 0.005385919 | hypothetical protein                                     |
| TGME49_267480 | 1.07  | 5.89  | 0.001778263 | 0.005399785 | tRNA (guanine(26)-N(2))-dimethyltransferase, putative    |
| TGME49_267390 | -1.31 | 6.54  | 0.00180349  | 0.005471894 | DNA-directed RNA polymerase I RPAC1                      |
| TGME49_316520 | -1.32 | 6.34  | 0.00181011  | 0.005481898 | 1,4-alpha-glucan-branching enzyme                        |
| TGME49_254900 | -1.09 | 6.78  | 0.001829058 | 0.005531312 | proteasome subunit beta type 2, putative                 |
| TGME49_309610 | -3.05 | 4.89  | 0.001833488 | 0.00554244  | hypothetical protein                                     |
| TGME49_280790 | 1.23  | 5.60  | 0.001842901 | 0.005568618 | phosphatidylinositol n-acetylglucosaminyltransferase     |
| TGME49_240960 | 1.75  | 7.06  | 0.001843941 | 0.005569485 | AIG2 family protein                                      |
| TGME49_204410 | -1.68 | 6.09  | 0.001858048 | 0.005609802 | endonuclease/exonuclease/phosphatase family protein      |
| TGME49_231590 | -1.57 | 5.88  | 0.001858925 | 0.005610161 | SGS domain-containing protein                            |
| TGME49_255440 | 1.29  | 5.19  | 0.001867381 | 0.005631084 | hypothetical protein                                     |
| TGME49_227920 | -1.66 | 5.69  | 0.001869363 | 0.005634761 | hypothetical protein                                     |
| TGME49_216580 | -1.57 | 6.03  | 0.001879841 | 0.005661729 | hypothetical protein                                     |
| TGME49_229290 | -7.57 | 4.73  | 0.001883085 | 0.005669189 | kelch repeat-containing protein                          |
| TGME49_258050 | -2.35 | 5.14  | 0.001915143 | 0.00575867  | actin like protein ALP2a                                 |
| TGME49_290225 | -3.01 | 5.04  | 0.001917356 | 0.00576298  | hypothetical protein                                     |
| TGME49_230210 | -1.10 | 10.35 | 0.001919079 | 0.005765814 | alveolin domain containing intermediate filament IMC10   |
| TGME49_239270 | -1.16 | 7.56  | 0.001922268 | 0.005773049 | hypothetical protein                                     |
| TGME49_234900 | -1.13 | 7.62  | 0.001936526 | 0.005813508 | PHD-finger domain-containing protein                     |
| TGME49_221490 | -2.34 | 5.40  | 0.001943376 | 0.005831706 | cell cycle regulator protein                             |
| TGME49_216700 | -3.00 | 4.75  | 0.001947915 | 0.005840585 | hypothetical protein                                     |

|               |       |      |             |             |                                                            |
|---------------|-------|------|-------------|-------------|------------------------------------------------------------|
| TGME49_200375 | -2.41 | 5.05 | 0.001954172 | 0.005852226 | hypothetical protein                                       |
| TGME49_208350 | 1.00  | 6.11 | 0.001956325 | 0.005856304 | hypothetical protein                                       |
| TGME49_272640 | -1.55 | 6.34 | 0.001957818 | 0.005857036 | eukaryotic initiation factor-2B, epsilon subunit, putative |
| TGME49_203970 | -2.35 | 5.54 | 0.001958154 | 0.005857036 | dolichyl-diphosphooligosaccharide--protein glycosyltran    |
| TGME49_308990 | -2.98 | 5.30 | 0.001963221 | 0.005869815 | transporter, solute:sodium symporter (SSS) family prote    |
| TGME49_226400 | -1.44 | 6.16 | 0.001983379 | 0.005927689 | lipoic acid synthase LIPA                                  |
| TGME49_261400 | -1.02 | 7.86 | 0.002016369 | 0.006014133 | hypothetical protein                                       |
| TGME49_216800 | 2.12  | 5.49 | 0.002026919 | 0.00604316  | flagellar/basal body protein                               |
| TGME49_213040 | -1.45 | 6.26 | 0.002029524 | 0.006048488 | hypothetical protein                                       |
| TGME49_218740 | 1.68  | 5.57 | 0.002040534 | 0.006078852 | membrane protein, putative                                 |
| TGME49_202520 | 1.22  | 6.53 | 0.002047255 | 0.006096417 | hypothetical protein                                       |
| TGME49_269140 | -1.49 | 6.33 | 0.002089924 | 0.006213469 | transport protein particle component, Bet3 domain-cont     |
| TGME49_297245 | -1.09 | 7.00 | 0.002091281 | 0.006215004 | transporter, major facilitator family protein              |
| TGME49_281980 | -1.12 | 6.99 | 0.0020962   | 0.006227121 | phosphatidate cytidyltransferase                           |
| TGME49_208390 | 1.32  | 6.10 | 0.002106785 | 0.006253541 | hypothetical protein                                       |
| TGME49_221410 | -1.11 | 6.65 | 0.002107836 | 0.006254149 | actin-like protein ALP4                                    |
| TGME49_260310 | 1.21  | 5.29 | 0.002110951 | 0.006260878 | ATP-binding cassette transporter ABC.B1                    |
| TGME49_308930 | -1.52 | 5.90 | 0.002119514 | 0.006281236 | 50S ribosomal protein L33, putative                        |
| TGME49_304720 | -1.72 | 5.94 | 0.002129888 | 0.006306925 | hypothetical protein                                       |
| TGME49_271000 | -1.88 | 5.98 | 0.002134182 | 0.006317111 | hypothetical protein                                       |
| TGME49_316750 | -2.99 | 4.89 | 0.002144879 | 0.006346231 | DEAD/DEAH box helicase domain-containing protein           |
| TGME49_318430 | -1.22 | 9.14 | 0.00214773  | 0.006352126 | malate dehydrogenase MDH                                   |
| TGME49_289120 | 1.08  | 6.55 | 0.002191582 | 0.006474054 | hypothetical protein                                       |
| TGME49_237170 | -1.72 | 6.80 | 0.002193985 | 0.006478564 | hypothetical protein                                       |
| TGME49_312650 | 1.34  | 6.55 | 0.002200568 | 0.006492654 | hypothetical protein                                       |
| TGME49_216870 | -1.78 | 5.83 | 0.002202269 | 0.006492654 | DNA excision repair helicase                               |
| TGME49_273885 | -2.34 | 5.11 | 0.002208323 | 0.006505314 | hypothetical protein                                       |
| TGME49_290310 | -1.79 | 5.87 | 0.002223932 | 0.00654608  | hypothetical protein                                       |
| TGME49_223020 | -1.11 | 6.34 | 0.002227687 | 0.006554523 | coproporphyrinogen III oxidase                             |
| TGME49_257170 | -2.95 | 5.13 | 0.002233378 | 0.006560826 | hypothetical protein                                       |
| TGME49_264650 | -7.56 | 4.90 | 0.002232869 | 0.006560826 | phosphoacetylglucosamine mutase                            |
| TGME49_294380 | -2.32 | 5.40 | 0.002244996 | 0.006592335 | PP-loop domain-containing protein                          |
| TGME49_277090 | 2.09  | 7.62 | 0.002260184 | 0.0066343   | carrier superfamily protein                                |
| TGME49_233520 | -1.09 | 6.77 | 0.002282414 | 0.006694236 | ATP-dependent RNA helicase                                 |
| TGME49_320670 | -1.24 | 6.65 | 0.002287278 | 0.006704194 | vacuolar protein sorting 16, putative                      |
| TGME49_309070 | 1.55  | 5.61 | 0.00228982  | 0.006705317 | hypothetical protein                                       |
| TGME49_260640 | -1.78 | 5.79 | 0.002291353 | 0.006707153 | autophagy protein app9 protein                             |
| TGME49_271110 | -2.96 | 5.21 | 0.002304204 | 0.006739433 | hypothetical protein                                       |
| TGME49_271990 | 1.10  | 6.11 | 0.002310925 | 0.006755699 | hypothetical protein                                       |
| TGME49_200330 | -1.42 | 6.65 | 0.002311593 | 0.006755699 | hypothetical protein                                       |
| TGME49_202280 | -2.99 | 5.77 | 0.002316042 | 0.006766026 | WD domain, G-beta repeat-containing protein                |
| TGME49_277970 | 1.14  | 5.90 | 0.002320467 | 0.006776277 | dolichol-phosphate-mannose synthase family protein         |
| TGME49_301170 | -7.53 | 5.92 | 0.002328567 | 0.006794564 | SAG-related sequence SRS19D                                |
| TGME49_315420 | 1.08  | 5.70 | 0.002333409 | 0.006806006 | hypothetical protein                                       |
| TGME49_270750 | -1.69 | 6.29 | 0.002370006 | 0.006899144 | hypothetical protein                                       |
| TGME49_223270 | 1.19  | 5.48 | 0.002381445 | 0.006927321 | hypothetical protein                                       |
| TGME49_273030 | -2.31 | 5.76 | 0.002388294 | 0.00694145  | phosphoglycerate mutase family protein                     |
| TGME49_262990 | -3.00 | 4.94 | 0.002391059 | 0.006946754 | hypothetical protein                                       |
| TGME49_223600 | -2.00 | 5.45 | 0.002398603 | 0.006965936 | hypothetical protein                                       |
| TGME49_215920 | 1.30  | 5.98 | 0.00240065  | 0.006969142 | hypothetical protein                                       |
| TGME49_240050 | 1.14  | 7.04 | 0.002426584 | 0.007033384 | hypothetical protein                                       |
| TGME49_307860 | 1.15  | 8.14 | 0.002429787 | 0.007038555 | hypothetical protein                                       |
| TGME49_232970 | -2.94 | 5.07 | 0.002430272 | 0.007038555 | hypothetical protein                                       |
| TGME49_220160 | -2.94 | 5.04 | 0.002438081 | 0.007058407 | WD domain-containing protein                               |
| TGME49_321540 | -1.00 | 7.08 | 0.002457758 | 0.007109806 | hypothetical protein                                       |
| TGME49_243780 | 1.03  | 5.94 | 0.002481508 | 0.007170093 | hypothetical protein                                       |
| TGME49_207450 | -1.41 | 5.89 | 0.002496025 | 0.007209223 | DNA segment, Chr 10, Wayne State University 52, expres     |



|               |       |      |             |             |                                                    |
|---------------|-------|------|-------------|-------------|----------------------------------------------------|
| TGME49_319320 | -1.36 | 6.45 | 0.002504753 | 0.007228785 | hypothetical protein                               |
| TGME49_246978 | -2.93 | 5.07 | 0.002506718 | 0.007231633 | hypothetical protein                               |
| TGME49_235402 | -7.51 | 4.70 | 0.002536297 | 0.007308409 | CorA family Mg2+ transporter protein               |
| TGME49_232035 | -1.99 | 5.23 | 0.002556069 | 0.007356782 | hypothetical protein                               |
| TGME49_278020 | -2.94 | 4.94 | 0.002583776 | 0.007422082 | hypothetical protein                               |
| TGME49_288510 | 2.14  | 5.86 | 0.002592065 | 0.007439797 | ubiquitin carboxyl-terminal hydrolase              |
| TGME49_268730 | 1.12  | 5.50 | 0.002597838 | 0.007450751 | glutaredoxin-related protein                       |
| TGME49_207065 | -1.77 | 5.59 | 0.002601296 | 0.007455031 | hypothetical protein                               |
| TGME49_281650 | -1.49 | 5.97 | 0.002607807 | 0.007470798 | hypothetical protein                               |
| TGME49_249320 | -1.97 | 5.46 | 0.002651257 | 0.007577657 | flavodoxin domain-containing protein               |
| TGME49_255215 | 2.48  | 5.93 | 0.002659869 | 0.007599332 | hypothetical protein                               |
| TGME49_293460 | -2.94 | 5.22 | 0.002678246 | 0.007642975 | ATP-dependent DNA ligase domain-containing protein |
| TGME49_288700 | -1.33 | 6.08 | 0.002703951 | 0.007710378 | RecF/RecN/SMC N terminal domain-containing protein |
| TGME49_220480 | -2.94 | 4.69 | 0.002724001 | 0.007764557 | hypothetical protein                               |
| TGME49_311320 | -2.37 | 5.00 | 0.00273772  | 0.007800656 | hypothetical protein                               |
| TGME49_311750 | 1.92  | 5.91 | 0.002756145 | 0.007847106 | mago binding protein                               |
| TGME49_207120 | 1.11  | 5.86 | 0.002770394 | 0.007881605 | Sad1/UNC family protein                            |
| TGME49_272000 | -1.96 | 5.52 | 0.002787736 | 0.007924844 | hypothetical protein                               |
| TGME49_311080 | -1.63 | 5.91 | 0.002792271 | 0.007934687 | transporter, cation channel family protein         |
| TGME49_311510 | -1.21 | 8.65 | 0.002798641 | 0.007940581 | eIF2 kinase IF2K-B                                 |
| TGME49_242240 | -1.32 | 6.05 | 0.002797858 | 0.007940581 | rhoptry kinase family protein ROP19A               |
| TGME49_221480 | -1.20 | 7.89 | 0.002805296 | 0.00795641  | hypothetical protein                               |
| TGME49_216190 | 1.35  | 5.21 | 0.002867932 | 0.008121595 | hypothetical protein                               |
| TGME49_227630 | 2.27  | 4.86 | 0.002905243 | 0.00822096  | hypothetical protein                               |
| TGME49_221390 | -1.59 | 5.94 | 0.002921043 | 0.008259346 | hypothetical protein                               |
| TGME49_209530 | 1.41  | 4.95 | 0.002946844 | 0.008329116 | hypothetical protein                               |
| TGME49_312360 | -2.92 | 4.90 | 0.002964672 | 0.008376303 | hypothetical protein                               |
| TGME49_227900 | 1.54  | 6.24 | 0.002971842 | 0.008393355 | AP2 domain transcription factor AP2X-1             |
| TGME49_258780 | 1.03  | 5.89 | 0.002978508 | 0.008408968 | OTU family cysteine protease                       |
| TGME49_249425 | -1.13 | 7.75 | 0.00297972  | 0.008409178 | hypothetical protein                               |
| TGME49_228460 | -1.50 | 6.12 | 0.003007059 | 0.008479862 | hypothetical protein                               |
| TGME49_249950 | -2.28 | 5.46 | 0.003017795 | 0.008503649 | Mak16 protein                                      |
| TGME49_255960 | -1.25 | 6.58 | 0.003021819 | 0.008511744 | hypothetical protein                               |
| TGME49_263070 | -1.00 | 8.09 | 0.003058709 | 0.008612374 | CMGC kinase, CK2 family                            |
| TGME49_319720 | -2.96 | 5.17 | 0.003073161 | 0.008642923 | hypothetical protein                               |
| TGME49_257120 | -1.20 | 5.94 | 0.003084155 | 0.008664711 | sugar transporter ST1                              |
| TGME49_224470 | 1.05  | 6.39 | 0.003086922 | 0.008668706 | hypothetical protein                               |
| TGME49_305260 | -2.89 | 4.78 | 0.00309747  | 0.008691725 | hypothetical protein                               |
| TGME49_320690 | -1.59 | 5.76 | 0.003110467 | 0.008721575 | gamma-soluble NSF attachment protein, putative     |
| TGME49_230920 | -2.89 | 4.80 | 0.003116158 | 0.008733062 | adaptor complexes medium subunit family protein    |
| TGME49_298070 | -7.52 | 5.01 | 0.003116926 | 0.008733062 | hypothetical protein                               |
| TGME49_247670 | -2.02 | 5.41 | 0.003124156 | 0.008750003 | ribulose-phosphate 3 epimerase family protein      |
| TGME49_210960 | -1.36 | 6.30 | 0.003139448 | 0.008784195 | replication factor C subunit 4, putative           |
| TGME49_249300 | -1.97 | 7.71 | 0.003170195 | 0.008862163 | hypothetical protein                               |
| TGME49_222270 | -1.25 | 6.62 | 0.003190304 | 0.008904911 | hypothetical protein                               |
| TGME49_265780 | -1.16 | 6.42 | 0.003244415 | 0.009042294 | flagellar/basal body protein                       |
| TGME49_264210 | 1.09  | 5.57 | 0.00325562  | 0.009070103 | hypothetical protein                               |
| TGME49_243530 | -7.39 | 4.75 | 0.00327128  | 0.009103442 | pentatricopeptide repeat domain-containing protein |
| TGME49_230710 | -2.93 | 5.18 | 0.003304531 | 0.009182151 | cell division protein CDC48                        |
| TGME49_289790 | -2.92 | 4.93 | 0.00333312  | 0.009258111 | hypothetical protein                               |
| TGME49_254610 | 1.59  | 5.99 | 0.003339126 | 0.00926783  | Tim10/DDP family zinc finger superfamily protein   |
| TGME49_217730 | 1.00  | 5.67 | 0.003365116 | 0.009332958 | hypothetical protein                               |
| TGME49_223420 | 1.31  | 5.26 | 0.003383171 | 0.009376    | DnaJ domain-containing protein                     |
| TGME49_307610 | -1.42 | 6.31 | 0.003417376 | 0.009460158 | elongation factor TS, putative                     |
| TGME49_320620 | -1.94 | 5.26 | 0.003436156 | 0.009505027 | queuine tRNA ribosyl transferase                   |
| TGME49_243790 | -1.57 | 5.96 | 0.003448795 | 0.009536421 | SAG-related sequence SRS33                         |
| TGME49_290640 | -1.13 | 7.98 | 0.003472934 | 0.009595992 | DNA mismatch repair protein MSH6-1, putative       |

|               |       |      |             |             |                                                           |
|---------------|-------|------|-------------|-------------|-----------------------------------------------------------|
| TGME49_294190 | -2.87 | 5.22 | 0.003483081 | 0.009620434 | enoyl-CoA hydratase/isomerase family protein              |
| TGME49_245580 | 1.03  | 6.12 | 0.003497051 | 0.009648207 | hypothetical protein                                      |
| TGME49_297330 | 1.08  | 5.60 | 0.003505416 | 0.009659131 | hypothetical protein                                      |
| TGME49_295950 | 1.42  | 6.77 | 0.003524077 | 0.009693833 | KRUF family protein                                       |
| TGME49_203280 | -2.28 | 5.13 | 0.003604907 | 0.00989409  | hypothetical protein                                      |
| TGME49_200440 | 1.32  | 5.08 | 0.003614187 | 0.009915879 | hypothetical protein                                      |
| TGME49_249270 | -1.22 | 9.01 | 0.003615899 | 0.009916898 | protein disulfide isomerase-related protein (provisional) |
| TGME49_301460 | 1.27  | 5.61 | 0.00364702  | 0.009987431 | hypothetical protein                                      |
| TGME49_264890 | -2.25 | 5.24 | 0.003670702 | 0.010048563 | hypothetical protein                                      |
| TGME49_267700 | -2.87 | 5.07 | 0.003705201 | 0.01013175  | hypothetical protein                                      |
| TGME49_307020 | -1.40 | 6.25 | 0.003709409 | 0.010139509 | hypothetical protein                                      |
| TGME49_253800 | -2.89 | 5.03 | 0.003714537 | 0.010149772 | ribosomal protein L15, putative                           |
| TGME49_286050 | 1.09  | 5.84 | 0.003722784 | 0.010168549 | hypothetical protein                                      |
| TGME49_246990 | -2.24 | 5.31 | 0.003756518 | 0.010253117 | hypothetical protein                                      |
| TGME49_258462 | -1.26 | 6.26 | 0.003828397 | 0.010426213 | hypothetical protein                                      |
| TGME49_264980 | 1.18  | 5.56 | 0.003864167 | 0.010512011 | hypothetical protein                                      |
| TGME49_277685 | -7.38 | 5.11 | 0.003908802 | 0.010617811 | hypothetical protein                                      |
| TGME49_207950 | -1.58 | 5.76 | 0.003940754 | 0.010696747 | hypothetical protein                                      |
| TGME49_233000 | -1.07 | 7.06 | 0.003994762 | 0.010827444 | KOW motif domain-containing protein                       |
| TGME49_219290 | 1.07  | 5.81 | 0.00402714  | 0.010899222 | F-actin-capping protein subunit beta, putative            |
| TGME49_219130 | -1.55 | 5.89 | 0.004025725 | 0.010899222 | NADPH-glutathione reductase                               |
| TGME49_215030 | -1.70 | 5.85 | 0.004026875 | 0.010899222 | hypothetical protein                                      |
| TGME49_288945 | -1.45 | 6.28 | 0.004032307 | 0.010909214 | hypothetical protein                                      |
| TGME49_222410 | -1.18 | 6.72 | 0.004042052 | 0.010931577 | hypothetical protein                                      |
| TGME49_257780 | -1.56 | 5.65 | 0.004063431 | 0.010985378 | hypothetical protein                                      |
| TGME49_228060 | -2.94 | 5.12 | 0.004071245 | 0.011002481 | hypothetical protein                                      |
| TGME49_231100 | -1.00 | 6.82 | 0.004175045 | 0.011265234 | hypothetical protein                                      |
| TGME49_249410 | -1.73 | 6.04 | 0.004227112 | 0.011387134 | hypothetical protein                                      |
| TGME49_260790 | -1.90 | 5.27 | 0.004241726 | 0.011418647 | RAP domain-containing protein                             |
| TGME49_216920 | -1.94 | 5.62 | 0.004242227 | 0.011418647 | mediator complex subunit MED8                             |
| TGME49_310620 | -1.02 | 6.77 | 0.004265158 | 0.011476194 | starch binding domain-containing protein                  |
| TGME49_244630 | 1.36  | 4.89 | 0.004274184 | 0.011496295 | hypothetical protein                                      |
| TGME49_212725 | -1.90 | 5.73 | 0.004349137 | 0.011668186 | hypothetical protein                                      |
| TGME49_309370 | -1.09 | 6.46 | 0.004356357 | 0.011683317 | adaptin n terminal region domain-containing protein       |
| TGME49_312700 | 1.71  | 6.57 | 0.004399414 | 0.011794514 | hypothetical protein                                      |
| TGME49_309730 | -1.23 | 8.64 | 0.004409188 | 0.011816432 | thioredoxin reductase                                     |
| TGME49_222840 | 1.21  | 8.70 | 0.004446317 | 0.011907304 | Ser/Thr phosphatase family protein                        |
| TGME49_223040 | 1.13  | 7.86 | 0.004458136 | 0.011930314 | hypothetical protein                                      |
| TGME49_227050 | -2.81 | 5.12 | 0.004489445 | 0.011992441 | ATPase/histidine kinase/DNA gyrase B/HSP90 domain-c       |
| TGME49_214120 | -2.85 | 4.78 | 0.004489461 | 0.011992441 | hypothetical protein                                      |
| TGME49_243750 | 2.44  | 5.73 | 0.004540686 | 0.012116142 | tetratricopeptide repeat-containing protein               |
| TGME49_289780 | -1.42 | 5.77 | 0.004563635 | 0.012172987 | ATP-dependent hsl protease ATP-binding subunit hslU, p    |
| TGME49_264240 | -7.39 | 4.81 | 0.004589883 | 0.012238584 | hypothetical protein                                      |
| TGME49_245540 | -1.11 | 6.30 | 0.004644586 | 0.012357707 | hypothetical protein                                      |
| TGME49_278260 | -2.82 | 4.79 | 0.004661733 | 0.012398868 | polynucleotide adenylyltransferase                        |
| TGME49_251710 | 1.15  | 5.03 | 0.004746225 | 0.012600928 | hypothetical protein                                      |
| TGME49_250040 | -1.57 | 5.65 | 0.004869791 | 0.012910447 | hypothetical protein                                      |
| TGME49_270350 | -1.13 | 6.42 | 0.004916517 | 0.013024983 | hypothetical protein                                      |
| TGME49_288990 | -2.26 | 5.24 | 0.004933307 | 0.013060104 | hypothetical protein                                      |
| TGME49_206500 | -2.88 | 4.78 | 0.005084687 | 0.013425178 | hypothetical protein                                      |
| TGME49_307800 | 1.30  | 6.04 | 0.005141593 | 0.013553275 | GDA1/CD39 (nucleoside phosphatase) family protein         |
| TGME49_269760 | 1.29  | 5.00 | 0.005139836 | 0.013553275 | 'chromo' (CHRromatin Organization MODifier) domain-c      |
| TGME49_263240 | -1.31 | 5.80 | 0.005151702 | 0.013575083 | hypothetical protein                                      |
| TGME49_272210 | -2.18 | 4.96 | 0.00515912  | 0.013589788 | hypothetical protein                                      |
| TGME49_278170 | -1.90 | 5.42 | 0.005161593 | 0.013591459 | hypothetical protein                                      |
| TGME49_299030 | 1.19  | 7.26 | 0.005213278 | 0.013712906 | RNA recognition motif 2 protein                           |
| TGME49_255980 | -1.31 | 5.74 | 0.005222511 | 0.013727426 | hypothetical protein                                      |

|               |       |      |             |             |                                                          |
|---------------|-------|------|-------------|-------------|----------------------------------------------------------|
| TGME49_228780 | 1.08  | 5.46 | 0.005229203 | 0.01373203  | Toxoplasma gondii family C protein                       |
| TGME49_220450 | -7.24 | 4.82 | 0.005260697 | 0.013803262 | ribonuclease HI protein                                  |
| TGME49_205625 | -2.80 | 5.09 | 0.005329257 | 0.013959271 | hypothetical protein                                     |
| TGME49_305510 | -1.13 | 7.27 | 0.005400795 | 0.014115759 | hypothetical protein                                     |
| TGME49_229160 | -2.82 | 4.89 | 0.00540026  | 0.014115759 | DHHC zinc finger domain-containing protein               |
| TGME49_251560 | -1.03 | 6.42 | 0.005445186 | 0.014211686 | hypothetical protein                                     |
| TGME49_202190 | 1.15  | 6.78 | 0.0054593   | 0.014242699 | hypothetical protein                                     |
| TGME49_256820 | -1.65 | 5.47 | 0.005490595 | 0.014304954 | zinc finger (CCCH type) motif-containing protein         |
| TGME49_299060 | -1.02 | 6.76 | 0.005494999 | 0.014311384 | sodium/hydrogen exchanger NHE2                           |
| TGME49_306020 | -1.31 | 6.20 | 0.005501194 | 0.014322475 | hypothetical protein                                     |
| TGME49_262450 | -1.15 | 7.29 | 0.005531671 | 0.014396752 | hypothetical protein                                     |
| TGME49_204350 | -1.51 | 5.92 | 0.005566229 | 0.014481595 | hypothetical protein                                     |
| TGME49_291820 | 1.27  | 6.44 | 0.005600475 | 0.014565568 | RNA helicase (UPF2 interacting domain) protein           |
| TGME49_243600 | -1.08 | 6.49 | 0.005649076 | 0.014671328 | acetyltransferase, GNAT family protein                   |
| TGME49_270520 | -1.26 | 8.13 | 0.005647379 | 0.014671328 | hypothetical protein                                     |
| TGME49_212100 | -7.23 | 4.92 | 0.005669853 | 0.014720118 | ThiF family protein                                      |
| TGME49_247590 | -1.86 | 5.36 | 0.005724946 | 0.01485272  | methyltransferase domain-containing protein              |
| TGME49_240500 | -1.31 | 5.85 | 0.00572915  | 0.014858413 | hypothetical protein                                     |
| TGME49_226390 | 2.47  | 5.45 | 0.005809574 | 0.015045881 | hypothetical protein                                     |
| TGME49_300330 | 1.06  | 5.61 | 0.005816375 | 0.01505295  | hypothetical protein                                     |
| TGME49_202410 | -1.34 | 6.11 | 0.005820374 | 0.015058029 | hypothetical protein                                     |
| TGME49_224490 | -2.80 | 5.05 | 0.005825064 | 0.015064892 | polyprenyl synthetase superfamily protein                |
| TGME49_227350 | -2.22 | 5.75 | 0.005837065 | 0.015090649 | hypothetical protein                                     |
| TGME49_267590 | -1.10 | 6.55 | 0.005840107 | 0.015093238 | hypothetical protein                                     |
| TGME49_266930 | 1.09  | 5.42 | 0.005851612 | 0.015117687 | general transcription factor IIH polypeptide 3 GTF2H3    |
| TGME49_293490 | 1.85  | 4.86 | 0.005855144 | 0.015121527 | hypothetical protein                                     |
| TGME49_279390 | -1.24 | 9.03 | 0.005877146 | 0.01517305  | proliferation-associated protein 2G4, putative           |
| TGME49_311140 | -2.15 | 4.93 | 0.005887154 | 0.015193583 | hypothetical protein                                     |
| TGME49_259860 | -1.21 | 6.06 | 0.005912938 | 0.015254803 | hypothetical protein                                     |
| TGME49_228380 | 2.83  | 5.03 | 0.005956046 | 0.01534995  | hypothetical protein                                     |
| TGME49_305010 | -1.71 | 5.59 | 0.005970247 | 0.015381187 | pre-mRNA branch site protein p14, putative               |
| TGME49_244010 | -1.83 | 5.45 | 0.006004327 | 0.015431349 | hypothetical protein                                     |
| TGME49_314800 | -1.12 | 6.52 | 0.006022312 | 0.015472195 | hypothetical protein                                     |
| TGME49_255340 | -1.08 | 6.51 | 0.00604864  | 0.015519643 | tetratricopeptide repeat-containing protein              |
| TGME49_213752 | -1.67 | 5.38 | 0.006048845 | 0.015519643 | herpesviridae ul52/ul70 dna primase                      |
| TGME49_226940 | -2.78 | 5.08 | 0.006069586 | 0.015561205 | ubiquitin carboxyl-terminal hydrolase                    |
| TGME49_273130 | 1.66  | 6.10 | 0.006076517 | 0.015573575 | SAG-related sequence SRS30A                              |
| TGME49_300990 | 1.11  | 5.28 | 0.006125993 | 0.015678641 | Toxoplasma gondii family C protein                       |
| TGME49_231220 | -2.14 | 4.89 | 0.006174179 | 0.015785573 | hypothetical protein                                     |
| TGME49_223710 | -1.04 | 6.49 | 0.006177889 | 0.015789599 | tetratricopeptide repeat-containing protein              |
| TGME49_285930 | -1.73 | 5.78 | 0.006215596 | 0.015874996 | hypothetical protein                                     |
| TGME49_258380 | -1.84 | 5.55 | 0.006268569 | 0.016004765 | elongation factor p (ef-p) kow family domain-containing  |
| TGME49_264420 | 3.44  | 4.97 | 0.006276742 | 0.016020101 | lipoprotein, putative                                    |
| TGME49_318360 | -1.64 | 5.27 | 0.006298951 | 0.016071236 | hypothetical protein                                     |
| TGME49_263360 | -1.63 | 5.69 | 0.006307988 | 0.016083194 | WD domain, G-beta repeat-containing protein              |
| TGME49_253600 | 1.18  | 6.68 | 0.006332704 | 0.016136641 | hypothetical protein                                     |
| TGME49_238140 | -1.19 | 6.57 | 0.006336645 | 0.016139565 | hypothetical protein                                     |
| TGME49_219510 | 1.66  | 6.27 | 0.006353167 | 0.016174852 | GTP binding protein 7 isoform 2 family protein, putative |
| TGME49_258100 | -2.78 | 4.89 | 0.006354875 | 0.016174852 | TPR repeat region protein                                |
| TGME49_221640 | 1.56  | 6.98 | 0.006427024 | 0.016335997 | hypothetical protein                                     |
| TGME49_217340 | -1.32 | 5.87 | 0.006450196 | 0.016383631 | hypothetical protein                                     |
| TGME49_227390 | -2.14 | 5.44 | 0.006487187 | 0.016471931 | hypothetical protein                                     |
| TGME49_251510 | 1.29  | 6.13 | 0.006557189 | 0.01663254  | Ulp1 protease family, C-terminal catalytic domain-conta  |
| TGME49_234470 | -1.48 | 5.77 | 0.006570983 | 0.016656102 | hypothetical protein                                     |
| TGME49_314530 | -2.77 | 5.09 | 0.006689001 | 0.016920449 | RPAP1 family, C-terminal protein                         |
| TGME49_285480 | 1.45  | 5.95 | 0.006701261 | 0.016939872 | hypothetical protein                                     |
| TGME49_313530 | -1.22 | 5.98 | 0.006807498 | 0.017179058 | transmembrane protein 167, putative                      |

|               |       |      |             |             |                                                         |
|---------------|-------|------|-------------|-------------|---------------------------------------------------------|
| TGME49_221280 | -1.03 | 6.77 | 0.006867607 | 0.017301221 | hypothetical protein                                    |
| TGME49_314390 | -1.37 | 5.75 | 0.006867318 | 0.017301221 | hypothetical protein                                    |
| TGME49_314710 | -1.20 | 6.29 | 0.006919716 | 0.017408771 | carrier superfamily protein                             |
| TGME49_217020 | -2.23 | 6.25 | 0.006936656 | 0.017445453 | ATPase, AFG1 family protein                             |
| TGME49_264670 | -1.16 | 6.15 | 0.006944447 | 0.017458664 | DNA polymerase family B protein                         |
| TGME49_273580 | -1.81 | 5.41 | 0.006990913 | 0.017558019 | hypothetical protein                                    |
| TGME49_226690 | -1.20 | 6.27 | 0.007047946 | 0.017695251 | hypothetical protein                                    |
| TGME49_267280 | 1.34  | 6.02 | 0.007085035 | 0.017776297 | hypothetical protein                                    |
| TGME49_236580 | -1.15 | 7.51 | 0.007220133 | 0.018072331 | Prp31-15.5k-U4 Snrna Complex family protein             |
| TGME49_239070 | -1.63 | 5.50 | 0.007215595 | 0.018072331 | hypothetical protein                                    |
| TGME49_238080 | 1.21  | 5.19 | 0.007234928 | 0.018103234 | hypothetical protein                                    |
| TGME49_203750 | -1.83 | 5.36 | 0.007276781 | 0.018201799 | hypothetical protein                                    |
| TGME49_260270 | -1.34 | 6.12 | 0.007281806 | 0.018208209 | HEAT repeat-containing protein                          |
| TGME49_267855 | -1.04 | 6.58 | 0.00729812  | 0.018242833 | hypothetical protein                                    |
| TGME49_217000 | -1.36 | 5.87 | 0.007300814 | 0.018243399 | hypothetical protein                                    |
| TGME49_309280 | -2.10 | 4.92 | 0.007313992 | 0.018270154 | zinc finger, C3HC4 type (RING finger) domain-containing |
| TGME49_307270 | -1.37 | 5.91 | 0.007326665 | 0.01829563  | hypothetical protein                                    |
| TGME49_211090 | -1.06 | 6.64 | 0.007410821 | 0.018480813 | aminotransferase, class V superfamily protein           |
| TGME49_278550 | -1.52 | 6.00 | 0.007435405 | 0.018529622 | elongation factor Tu GTP binding domain-containing pro  |
| TGME49_224160 | 1.03  | 5.52 | 0.007561617 | 0.018825116 | hypothetical protein                                    |
| TGME49_322010 | -1.61 | 5.47 | 0.007572693 | 0.018840003 | myosin-light-chain kinase                               |
| TGME49_233260 | -1.52 | 5.63 | 0.007606155 | 0.018891472 | GTP-binding protein, putative                           |
| TGME49_300180 | -2.69 | 4.77 | 0.007632511 | 0.018950567 | hypothetical protein                                    |
| TGME49_307575 | -2.70 | 5.16 | 0.007665618 | 0.019019993 | hypothetical protein                                    |
| TGME49_306250 | 1.16  | 5.14 | 0.007685984 | 0.019051347 | hypothetical protein                                    |
| TGME49_293500 | 1.06  | 5.56 | 0.007736005 | 0.019154644 | hypothetical protein                                    |
| TGME49_257500 | 1.33  | 5.05 | 0.007785241 | 0.019265084 | hypothetical protein                                    |
| TGME49_257070 | -2.10 | 5.02 | 0.007800802 | 0.019297132 | hypothetical protein                                    |
| TGME49_252310 | -1.27 | 6.41 | 0.007867963 | 0.019437259 | hypothetical protein                                    |
| TGME49_227820 | -1.19 | 6.10 | 0.007873814 | 0.019438725 | hypothetical protein                                    |
| TGME49_249450 | -2.70 | 4.73 | 0.007944109 | 0.01958611  | hypothetical protein                                    |
| TGME49_263785 | 1.23  | 5.14 | 0.008017627 | 0.019734465 | phosphatidate cytidyltransferase                        |
| TGME49_231040 | -2.71 | 4.79 | 0.008020879 | 0.019735901 | 3' exoribonuclease family, domain 1 domain-containing   |
| TGME49_270060 | -1.61 | 5.79 | 0.008045679 | 0.019777177 | hypothetical protein                                    |
| TGME49_310330 | -1.81 | 5.47 | 0.008099459 | 0.019882935 | hypothetical protein                                    |
| TGME49_224190 | -1.15 | 6.40 | 0.008114431 | 0.019906471 | cation-transporting atpase family protein               |
| TGME49_233245 | -2.09 | 4.98 | 0.008239428 | 0.02016628  | hypothetical protein                                    |
| TGME49_209190 | -1.05 | 6.40 | 0.008275709 | 0.020239923 | ABC transporter transmembrane region domain-contain     |
| TGME49_310500 | -1.17 | 6.13 | 0.008277729 | 0.020239923 | hypothetical protein                                    |
| TGME49_206710 | 2.02  | 5.64 | 0.00846752  | 0.020628943 | hypothetical protein                                    |
| TGME49_312520 | -2.69 | 5.37 | 0.008726624 | 0.021225217 | tRNA dimethylallyltransferase                           |
| TGME49_293680 | -1.29 | 6.24 | 0.008731977 | 0.021231253 | hypothetical protein                                    |
| TGME49_228070 | 1.00  | 5.71 | 0.008749592 | 0.021267088 | hypothetical protein                                    |
| TGME49_258010 | -1.64 | 5.57 | 0.008795724 | 0.021365173 | calcium signaling protein kinase RAD53, putative        |
| TGME49_239310 | -2.12 | 5.36 | 0.008848195 | 0.021483789 | ribose 5-phosphate isomerase                            |
| TGME49_305870 | -2.08 | 5.28 | 0.008862006 | 0.021497923 | DAD family protein                                      |
| TGME49_253930 | -1.03 | 6.95 | 0.008874489 | 0.02151409  | GCC2 and GCC3 domain-containing protein                 |
| TGME49_261370 | 1.03  | 7.02 | 0.008878339 | 0.021516367 | hypothetical protein                                    |
| TGME49_283730 | -1.10 | 6.24 | 0.008897523 | 0.021555794 | endomembrane protein 70 subfamily protein               |
| TGME49_320070 | -1.11 | 6.00 | 0.008912306 | 0.021584537 | CDK-activating kinase assembly factor MAT1 protein      |
| TGME49_214170 | -1.46 | 5.69 | 0.008921877 | 0.021586505 | hypothetical protein                                    |
| TGME49_261960 | 1.20  | 5.17 | 0.008955942 | 0.021647674 | hypothetical protein                                    |
| TGME49_262590 | 1.57  | 5.43 | 0.008972055 | 0.021671974 | hypothetical protein                                    |
| TGME49_316760 | 1.08  | 5.65 | 0.008974788 | 0.021671974 | hypothetical protein                                    |
| TGME49_206700 | -2.69 | 4.86 | 0.009053551 | 0.021840769 | hypothetical protein                                    |
| TGME49_308030 | -1.36 | 5.86 | 0.009072786 | 0.021880033 | hypothetical protein                                    |
| TGME49_267550 | -1.06 | 5.97 | 0.009077029 | 0.021882606 | leucine-rich repeat protein LRR1                        |

|               |       |      |             |             |                                                             |
|---------------|-------|------|-------------|-------------|-------------------------------------------------------------|
| TGME49_267450 | -1.07 | 6.26 | 0.009119981 | 0.021965192 | alpha-tubulin suppressor protein                            |
| TGME49_232980 | 1.16  | 5.06 | 0.009127071 | 0.02197511  | hypothetical protein                                        |
| TGME49_242880 | -1.76 | 5.25 | 0.009143607 | 0.022007756 | flavoprotein                                                |
| TGME49_283900 | -1.47 | 5.67 | 0.009188801 | 0.022094958 | ATPase, AAA family protein                                  |
| TGME49_206490 | -1.12 | 6.09 | 0.009197298 | 0.0221082   | ICE family protease (caspase) p20 domain-containing protein |
| TGME49_262170 | -1.76 | 5.41 | 0.009207199 | 0.022124408 | hypothetical protein                                        |
| TGME49_225710 | -2.09 | 4.95 | 0.009354932 | 0.022457912 | mitochondrial inner membrane translocase subunit TIM23      |
| TGME49_320440 | -1.56 | 6.19 | 0.00941382  | 0.02256997  | hypothetical protein                                        |
| TGME49_270170 | -1.44 | 5.71 | 0.009435745 | 0.022607873 | hypothetical protein                                        |
| TGME49_219738 | -1.15 | 6.44 | 0.009645081 | 0.023050709 | hypothetical protein                                        |
| TGME49_289110 | 1.52  | 4.69 | 0.009762676 | 0.023323176 | hypothetical protein                                        |
| TGME49_221700 | -1.11 | 6.08 | 0.009795439 | 0.023393888 | hypothetical protein                                        |
| TGME49_220530 | 1.44  | 5.63 | 0.009890148 | 0.023589597 | AP2 domain transcription factor AP2V-1                      |
| TGME49_316240 | -1.32 | 6.03 | 0.010007351 | 0.02384607  | hypothetical protein                                        |
| TGME49_258940 | 1.21  | 5.05 | 0.010021846 | 0.023872916 | acylphosphatase family protein                              |
| TGME49_225420 | -2.04 | 5.08 | 0.010130913 | 0.024109422 | histidine triad domain-containing protein                   |
| TGME49_238130 | -1.24 | 5.86 | 0.010238929 | 0.024327328 | hypothetical protein                                        |
| TGME49_212290 | -1.20 | 9.79 | 0.010265874 | 0.024375683 | ribosomal protein RPS19                                     |
| TGME49_288730 | 1.41  | 4.73 | 0.010296543 | 0.024409311 | hypothetical protein                                        |
| TGME49_313090 | -1.77 | 5.25 | 0.010389157 | 0.024605198 | hypothetical protein                                        |
| TGME49_227270 | 1.71  | 5.63 | 0.010507728 | 0.024846224 | hypothetical protein                                        |
| TGME49_276910 | -1.02 | 6.62 | 0.010517169 | 0.024856315 | endoplasmic reticulum lumen protein retaining receptor      |
| TGME49_203050 | 1.66  | 6.44 | 0.010541269 | 0.024892678 | AP2 domain transcription factor AP2VIIa-6                   |
| TGME49_267460 | -2.04 | 4.87 | 0.010544207 | 0.024892678 | AP2 domain transcription factor AP2IX-1                     |
| TGME49_260840 | -2.63 | 4.88 | 0.010597015 | 0.025001381 | hypothetical protein                                        |
| TGME49_315920 | -1.75 | 5.33 | 0.010702143 | 0.025217223 | DNA-directed RNA polymerase II RPB11A                       |
| TGME49_314030 | 1.50  | 5.75 | 0.010812058 | 0.025468096 | hypothetical protein                                        |
| TGME49_311740 | -1.75 | 5.52 | 0.010949498 | 0.025767214 | hypothetical protein                                        |
| TGME49_201810 | 1.07  | 7.33 | 0.010975942 | 0.025813013 | hypothetical protein                                        |
| TGME49_275770 | -1.15 | 6.31 | 0.011052409 | 0.025984583 | hypothetical protein                                        |
| TGME49_205550 | -1.54 | 5.44 | 0.011063956 | 0.026003461 | AGC kinase                                                  |
| TGME49_277820 | -2.05 | 5.23 | 0.011069101 | 0.026007288 | hypothetical protein                                        |
| TGME49_294730 | -1.19 | 6.29 | 0.011085839 | 0.02603834  | hypothetical protein                                        |
| TGME49_271770 | -2.03 | 5.22 | 0.011099819 | 0.026057766 | hypothetical protein                                        |
| TGME49_232310 | -1.73 | 5.22 | 0.011134839 | 0.026111958 | endonuclease/exonuclease/phosphatase family protein         |
| TGME49_248180 | 2.57  | 4.71 | 0.011147466 | 0.02613328  | hypothetical protein                                        |
| TGME49_320720 | -2.05 | 5.10 | 0.011161357 | 0.02615755  | hypothetical protein                                        |
| TGME49_278250 | 1.10  | 5.20 | 0.01119186  | 0.02619694  | hypothetical protein                                        |
| TGME49_284645 | -1.55 | 5.66 | 0.011211243 | 0.02622459  | hypothetical protein                                        |
| TGME49_276100 | -1.58 | 5.52 | 0.011225391 | 0.02624938  | hypothetical protein                                        |
| TGME49_298010 | -1.13 | 7.06 | 0.011397131 | 0.026625715 | hypothetical protein                                        |
| TGME49_253960 | 1.17  | 4.75 | 0.011408628 | 0.026644156 | oxidoreductase, short chain dehydrogenase/reductase family  |
| TGME49_295680 | -1.29 | 5.74 | 0.011458157 | 0.026751377 | periodic tryptophan protein PWP2, putative                  |
| TGME49_293220 | 1.85  | 5.72 | 0.011659085 | 0.027177578 | DHHC zinc finger domain-containing protein                  |
| TGME49_202350 | -1.39 | 5.81 | 0.011751789 | 0.02737641  | 50S ribosomal protein L21, putative                         |
| TGME49_217410 | -6.96 | 4.73 | 0.011761556 | 0.027390535 | hypothetical protein                                        |
| TGME49_305930 | 1.10  | 4.79 | 0.011792646 | 0.027445649 | hypothetical protein                                        |
| TGME49_215250 | -1.72 | 5.32 | 0.011817205 | 0.027494152 | thiamin pyrophosphokinase, catalytic domain-containing      |
| TGME49_220150 | -1.72 | 5.32 | 0.011848308 | 0.027549178 | 50S ribosomal protein L16, putative                         |
| TGME49_306590 | 1.47  | 6.35 | 0.011914138 | 0.027684833 | hypothetical protein                                        |
| TGME49_269050 | -1.21 | 5.62 | 0.011925212 | 0.027701858 | hypothetical protein                                        |
| TGME49_257560 | 1.25  | 5.00 | 0.011938884 | 0.027724907 | WD domain, G-beta repeat-containing protein                 |
| TGME49_300980 | -1.20 | 5.77 | 0.012036624 | 0.027877625 | hypothetical protein                                        |
| TGME49_207720 | -1.20 | 6.17 | 0.012046618 | 0.027887506 | hypothetical protein                                        |
| TGME49_297910 | -2.63 | 5.66 | 0.012067881 | 0.027927984 | hypothetical protein                                        |
| TGME49_234370 | -2.11 | 5.10 | 0.012077349 | 0.027941151 | SAG-related sequence SRS42                                  |
| TGME49_268250 | -1.39 | 5.54 | 0.012097867 | 0.027979865 | WD domain, G-beta repeat-containing protein                 |

|               |       |      |             |             |                                                          |
|---------------|-------|------|-------------|-------------|----------------------------------------------------------|
| TGME49_278890 | -1.74 | 5.41 | 0.012141262 | 0.028045139 | hypothetical protein                                     |
| TGME49_275740 | -2.66 | 4.73 | 0.012226399 | 0.028224163 | hypothetical protein                                     |
| TGME49_219620 | 1.14  | 5.27 | 0.012407713 | 0.028580259 | hypothetical protein                                     |
| TGME49_305040 | -1.59 | 6.83 | 0.012414354 | 0.028586651 | HEAT repeat-containing protein                           |
| TGME49_213930 | -1.72 | 5.15 | 0.012475984 | 0.028710683 | 3' exoribonuclease family, domain 1 domain-containing    |
| TGME49_235905 | -2.00 | 5.09 | 0.01249267  | 0.028731198 | ribonuclease z, putative                                 |
| TGME49_234560 | -1.08 | 6.18 | 0.012504353 | 0.028749125 | hypothetical protein                                     |
| TGME49_260150 | 1.15  | 4.92 | 0.012522452 | 0.028772843 | tetratricopeptide repeat-containing protein              |
| TGME49_213635 | -1.02 | 5.25 | 0.012645213 | 0.029036864 | hypothetical protein                                     |
| TGME49_214310 | 1.60  | 5.53 | 0.012668421 | 0.029081125 | hypothetical protein                                     |
| TGME49_223725 | 2.08  | 5.42 | 0.012841107 | 0.029431848 | hypothetical protein                                     |
| TGME49_204040 | -2.00 | 4.98 | 0.012876316 | 0.029503403 | hypothetical protein                                     |
| TGME49_320470 | 1.79  | 5.10 | 0.012926985 | 0.029582832 | hypothetical protein                                     |
| TGME49_295000 | -1.23 | 5.89 | 0.012945757 | 0.029607464 | hypothetical protein                                     |
| TGME49_294750 | -2.55 | 4.76 | 0.013076128 | 0.029868671 | hypothetical protein                                     |
| TGME49_309880 | -1.04 | 6.92 | 0.013110544 | 0.029928794 | hypothetical protein                                     |
| TGME49_232590 | 1.37  | 6.36 | 0.01318822  | 0.030087535 | glutamate-cysteine ligase, catalytic subunit domain-cont |
| TGME49_246610 | -2.04 | 4.95 | 0.013234632 | 0.030174799 | hypothetical protein                                     |
| TGME49_236130 | 1.59  | 6.02 | 0.013314842 | 0.030306159 | signal recognition particle (SRP9) domain-containing pro |
| TGME49_316770 | -1.37 | 5.68 | 0.013320938 | 0.030306159 | undecaprenyl diphosphate synthase                        |
| TGME49_254480 | 1.36  | 5.93 | 0.013655034 | 0.030951969 | WD domain, G-beta repeat-containing protein              |
| TGME49_287220 | 1.87  | 6.36 | 0.013696759 | 0.031027523 | hypothetical protein                                     |
| TGME49_297060 | -1.30 | 8.50 | 0.013715625 | 0.031059032 | phosphoglycerate mutase PGMII                            |
| TGME49_202730 | -1.71 | 5.45 | 0.013858548 | 0.031346009 | hypothetical protein                                     |
| TGME49_216040 | -1.19 | 6.01 | 0.013894074 | 0.031416753 | 30S ribosomal protein S15, putative                      |
| TGME49_202230 | -1.18 | 5.96 | 0.014010045 | 0.031640279 | histone deacetylase HDAC5                                |
| TGME49_226090 | -2.55 | 5.05 | 0.014045275 | 0.031700476 | DEAD/DEAH box helicase domain-containing protein         |
| TGME49_206300 | -1.99 | 5.15 | 0.014111333 | 0.031820432 | hypothetical protein                                     |
| TGME49_243240 | 1.26  | 4.74 | 0.014155343 | 0.031890496 | WD domain, G-beta repeat-containing protein              |
| TGME49_203860 | 1.40  | 4.73 | 0.014210759 | 0.032005589 | hypothetical protein                                     |
| TGME49_246010 | 2.37  | 5.31 | 0.014232542 | 0.032035133 | hypothetical protein                                     |
| TGME49_213690 | -1.36 | 5.66 | 0.014228933 | 0.032035133 | ring box protein 1 family protein                        |
| TGME49_305620 | -1.31 | 5.96 | 0.014246746 | 0.032047594 | hypothetical protein                                     |
| TGME49_263740 | 1.97  | 5.66 | 0.014339478 | 0.032236576 | ABC transporter transmembrane region domain-contain      |
| TGME49_215450 | 1.91  | 6.55 | 0.014403413 | 0.03236063  | aquaporin 1                                              |
| TGME49_290840 | -1.05 | 6.35 | 0.014577841 | 0.032712021 | serine protease                                          |
| TGME49_251590 | 1.10  | 5.99 | 0.014664576 | 0.032877465 | hypothetical protein                                     |
| TGME49_261430 | -1.36 | 5.96 | 0.014698674 | 0.032933937 | hypothetical protein                                     |
| TGME49_277850 | -1.63 | 5.67 | 0.014857828 | 0.033240175 | trypsin domain-containing protein                        |
| TGME49_309420 | -1.37 | 5.59 | 0.015145052 | 0.033821356 | ferlin family protein                                    |
| TGME49_299040 | -1.13 | 5.81 | 0.015229029 | 0.033998622 | phosphatidylinositol n-acetylglucosaminyltransferase     |
| TGME49_254810 | 1.22  | 4.83 | 0.015403827 | 0.034347376 | hypothetical protein                                     |
| TGME49_214400 | -1.96 | 5.11 | 0.015417056 | 0.03436651  | hypothetical protein                                     |
| TGME49_257980 | 2.38  | 4.93 | 0.015461201 | 0.034444146 | ribosome recycling factor protein                        |
| TGME49_209290 | -1.03 | 9.66 | 0.015585329 | 0.034647602 | ribosomal protein RPS28                                  |
| TGME49_233770 | -2.20 | 6.27 | 0.01560608  | 0.034683305 | calcium-translocating P-type ATPase, PMCA-type protein   |
| TGME49_211480 | -1.47 | 5.45 | 0.01564151  | 0.034751601 | GTP-binding protein engA, putative                       |
| TGME49_246690 | -1.66 | 5.40 | 0.015650476 | 0.034761075 | alpha amylase, catalytic domain-containing protein       |
| TGME49_212735 | -1.98 | 5.29 | 0.015944788 | 0.035340457 | hypothetical protein                                     |
| TGME49_232530 | -1.66 | 5.46 | 0.016152216 | 0.03576804  | hypothetical protein                                     |
| TGME49_275420 | -1.12 | 6.42 | 0.016284843 | 0.036029362 | histone lysine-specific demethylase LSD1/BHC110/KDMA     |
| TGME49_291120 | -1.24 | 5.68 | 0.016369361 | 0.036205521 | trafficking protein mon1 subfamily protein               |
| TGME49_290240 | 1.41  | 5.69 | 0.01645498  | 0.036373132 | hypothetical protein                                     |
| TGME49_313470 | 1.15  | 5.06 | 0.016453301 | 0.036373132 | helix-hairpin-helix motif domain-containing protein      |
| TGME49_235700 | -1.05 | 6.40 | 0.01647746  | 0.036411936 | sedoheptulose-1,7-bisphosphatase                         |
| TGME49_201240 | 1.15  | 5.40 | 0.016562762 | 0.036589502 | hypothetical protein                                     |
| TGME49_289130 | -1.94 | 4.92 | 0.016631801 | 0.036694228 | hypothetical protein                                     |

|               |       |      |             |             |                                                           |
|---------------|-------|------|-------------|-------------|-----------------------------------------------------------|
| TGME49_309940 | -1.26 | 5.91 | 0.016716711 | 0.036841538 | phospholipase D active site domain-containing protein     |
| TGME49_205100 | -1.46 | 5.29 | 0.016715129 | 0.036841538 | hypothetical protein                                      |
| TGME49_248840 | -1.42 | 5.56 | 0.01672732  | 0.036853934 | transporter, major facilitator family protein             |
| TGME49_218610 | -1.51 | 5.51 | 0.016784015 | 0.036943792 | ATPase (DUF699) protein                                   |
| TGME49_211300 | -1.66 | 5.07 | 0.01678809  | 0.036943792 | DUF74 family protein, putative                            |
| TGME49_268010 | -1.15 | 5.82 | 0.016880389 | 0.037113767 | hypothetical protein                                      |
| TGME49_289950 | -1.01 | 6.53 | 0.016964082 | 0.037264988 | hypothetical protein                                      |
| TGME49_218230 | -1.33 | 5.66 | 0.016964289 | 0.037264988 | histone lysine methyltransferase, SET, putative           |
| TGME49_201770 | 1.42  | 6.50 | 0.017120668 | 0.037563863 | cullin 3, putative                                        |
| TGME49_286640 | -2.49 | 4.82 | 0.017146195 | 0.037597558 | GTPase                                                    |
| TGME49_231890 | -1.25 | 6.02 | 0.017190371 | 0.03768325  | beta-ketoacyl-acyl carrier protein synthase III, putative |
| TGME49_275568 | -1.11 | 6.27 | 0.017297838 | 0.037885135 | GPI transamidase subunit PIG-U protein                    |
| TGME49_308590 | -1.13 | 6.01 | 0.017441194 | 0.038153901 | Mov34/MPN/PAD-1 family protein                            |
| TGME49_249710 | -1.46 | 5.23 | 0.017557107 | 0.038384758 | Parkinson disease 7 domain containing 1 family protein    |
| TGME49_262700 | 1.22  | 6.44 | 0.017644465 | 0.038552947 | tetratricopeptide repeat-containing protein               |
| TGME49_219230 | -1.11 | 6.00 | 0.017869789 | 0.038987671 | AMP-binding enzyme domain-containing protein              |
| TGME49_210750 | 1.78  | 5.09 | 0.01798071  | 0.039194978 | Ferredoxin-fold anticodon binding domain-containing pr    |
| TGME49_320700 | 1.09  | 5.08 | 0.018071285 | 0.039348705 | AP2 domain transcription factor AP2IV-1                   |
| TGME49_210440 | 1.04  | 6.10 | 0.018230693 | 0.039634737 | polynucleotide adenylyltransferase                        |
| TGME49_210310 | -1.63 | 5.16 | 0.018385376 | 0.039924073 | hypothetical protein                                      |
| TGME49_286130 | 1.11  | 4.91 | 0.01842217  | 0.039982594 | hypothetical protein                                      |
| TGME49_249490 | -1.08 | 5.82 | 0.018423197 | 0.039982594 | hypothetical protein                                      |
| TGME49_277500 | -1.47 | 7.54 | 0.018686715 | 0.040471462 | 26S proteasome regulatory subunit 7, putative             |
| TGME49_225190 | 2.25  | 4.76 | 0.018718889 | 0.040509941 | hypothetical protein                                      |
| TGME49_270130 | 1.08  | 5.21 | 0.018720918 | 0.040509941 | hypothetical protein                                      |
| TGME49_271240 | -1.91 | 5.16 | 0.018882859 | 0.040836462 | hypothetical protein                                      |
| TGME49_298610 | -1.04 | 8.23 | 0.018892573 | 0.040845523 | GYF domain-containing protein                             |
| TGME49_237100 | 1.06  | 5.16 | 0.018956085 | 0.040958882 | RAP domain-containing protein                             |
| TGME49_250955 | 1.38  | 7.35 | 0.019082296 | 0.041195474 | KRUF family protein                                       |
| TGME49_258800 | 1.07  | 5.25 | 0.01918682  | 0.041384873 | rhoptry kinase family protein ROP31                       |
| TGME49_293700 | -1.14 | 6.01 | 0.019367187 | 0.041713074 | WD domain, G-beta repeat-containing protein               |
| TGME49_263750 | -1.31 | 5.91 | 0.019468979 | 0.041895702 | hypothetical protein                                      |
| TGME49_226350 | 1.01  | 5.21 | 0.01950323  | 0.041944993 | hypothetical protein                                      |
| TGME49_263190 | -2.46 | 4.74 | 0.019652068 | 0.042179214 | adenylosuccinate lyase, putative                          |
| TGME49_285720 | -1.90 | 4.96 | 0.019685178 | 0.042225764 | ATP binding protein, putative                             |
| TGME49_240950 | -2.50 | 4.75 | 0.019699653 | 0.042244557 | hypothetical protein                                      |
| TGME49_235450 | 1.02  | 7.07 | 0.019782783 | 0.042385946 | ubiquitin-conjugating enzyme subfamily protein            |
| TGME49_284040 | -1.16 | 6.15 | 0.019900935 | 0.042614398 | hypothetical protein                                      |
| TGME49_313070 | -1.21 | 5.58 | 0.019995093 | 0.042803624 | hypothetical protein                                      |
| TGME49_265510 | -1.01 | 7.43 | 0.020014028 | 0.042831757 | hypothetical protein                                      |
| TGME49_218000 | -1.61 | 5.14 | 0.020072461 | 0.042931957 | hypothetical protein                                      |
| TGME49_258650 | -1.90 | 5.11 | 0.020100041 | 0.04296609  | protoheme ferro-lyase, putative                           |
| TGME49_320680 | 1.44  | 4.90 | 0.020243193 | 0.043259586 | AP2 domain transcription factor AP2IV-2                   |
| TGME49_269430 | 1.14  | 5.08 | 0.020259157 | 0.043281193 | polyprenyl synthetase superfamily protein                 |
| TGME49_222430 | -1.21 | 5.65 | 0.020492809 | 0.043701531 | HECT-domain (ubiquitin-transferase) domain-containing     |
| TGME49_255195 | 1.10  | 5.32 | 0.020578477 | 0.043861995 | hypothetical protein                                      |
| TGME49_272290 | -1.01 | 6.44 | 0.020672846 | 0.044012387 | pyruvate dehydrogenase complex subunit PD-HE1Beta         |
| TGME49_255170 | -2.43 | 5.01 | 0.020667469 | 0.044012387 | hypothetical protein                                      |
| TGME49_202220 | 1.47  | 6.78 | 0.021008272 | 0.04463654  | hypothetical protein                                      |
| TGME49_238190 | -1.01 | 5.98 | 0.021064486 | 0.044743122 | DNA-directed RNA polymerase II RPB3                       |
| TGME49_319710 | -1.07 | 6.22 | 0.02108776  | 0.044779694 | kinesin motor domain-containing protein                   |
| TGME49_262460 | -1.19 | 5.69 | 0.021170129 | 0.044902939 | hypothetical protein                                      |
| TGME49_320610 | -1.92 | 5.08 | 0.021210211 | 0.04494135  | hypothetical protein                                      |
| TGME49_293350 | -1.06 | 6.08 | 0.021529314 | 0.04558641  | mitochondrial carrier superfamily protein                 |
| TGME49_239748 | -1.39 | 5.45 | 0.021566669 | 0.045639368 | hypothetical protein                                      |
| TGME49_262760 | -1.21 | 5.46 | 0.021598411 | 0.045674593 | poly(ADP-ribose) glycohydrolase                           |
| TGME49_270975 | -1.36 | 5.71 | 0.021599111 | 0.045674593 | hypothetical protein                                      |

|               |       |      |             |             |                                                        |
|---------------|-------|------|-------------|-------------|--------------------------------------------------------|
| TGME49_243590 | -1.45 | 5.49 | 0.021996256 | 0.046389137 | endonuclease/exonuclease/phosphatase family protein    |
| TGME49_219100 | -1.28 | 5.69 | 0.022059869 | 0.04649677  | cyclin-dependent kinase regulatory subunit protein     |
| TGME49_288240 | 1.21  | 4.81 | 0.022103032 | 0.046561201 | hypothetical protein                                   |
| TGME49_231930 | -2.46 | 4.73 | 0.022200839 | 0.046716919 | hypothetical protein                                   |
| TGME49_300320 | 2.19  | 4.83 | 0.022255032 | 0.046814709 | dimethyladenosine transferase                          |
| TGME49_263440 | -1.58 | 5.39 | 0.02226183  | 0.046815692 | hypothetical protein                                   |
| TGME49_212770 | -1.33 | 8.99 | 0.022369286 | 0.047001562 | hypothetical protein                                   |
| TGME49_294420 | -1.86 | 4.78 | 0.022397415 | 0.047033936 | programmed cell death protein 2, c-terminal domain-co  |
| TGME49_238940 | 1.18  | 4.73 | 0.022625175 | 0.047471777 | GDP mannose 4,6-dehydratase, putative                  |
| TGME49_200460 | 1.17  | 6.56 | 0.022731589 | 0.047654484 | hypothetical protein                                   |
| TGME49_215480 | -1.40 | 5.60 | 0.02278965  | 0.047749127 | Adenosine/AMP deaminase domain-containing protein      |
| TGME49_231870 | -1.59 | 5.18 | 0.022906131 | 0.047952415 | tetratricopeptide repeat-containing protein            |
| TGME49_269000 | -1.62 | 5.10 | 0.02293122  | 0.04797777  | ABC transporter family protein                         |
| TGME49_218960 | -1.07 | 8.73 | 0.023137567 | 0.048382117 | AP2 domain transcription factor AP2XII-1               |
| TGME49_219682 | -1.11 | 5.84 | 0.023252391 | 0.048581005 | pyruvate dehydrogenase kinase, putative                |
| TGME49_230990 | 1.09  | 5.02 | 0.023318609 | 0.048691836 | hypothetical protein                                   |
| TGME49_285670 | 1.81  | 4.94 | 0.023348288 | 0.048726288 | hypothetical protein                                   |
| TGME49_244412 | -1.85 | 5.00 | 0.023357433 | 0.04873162  | hypothetical protein                                   |
| TGME49_318320 | -1.88 | 5.00 | 0.023433525 | 0.048849023 | ATP-dependent Clp endopeptidase, proteolytic subunit C |
| TGME49_313710 | -1.22 | 5.42 | 0.023562649 | 0.049076684 | hypothetical protein                                   |
| TGME49_263580 | 1.27  | 6.93 | 0.024014182 | 0.049876647 | bromodomain-containing protein                         |
| TGME49_220330 | -2.44 | 5.33 | 0.024066728 | 0.049971746 | hypothetical protein                                   |



**Supplementary Table S8A: Differential expression analysis of human miRNA genes from MM6 cells infected with *T. gondii* EGS strain for 18 hours.**

| gene_ID         | logFC (cont-inf) | logCPM | PValue   | FDR      |
|-----------------|------------------|--------|----------|----------|
| hsa-mir-708-5p  | -11.46           | 5.68   | 6.11E-22 | 2.54E-18 |
| hsa-mir-708-3p  | -10.28           | 4.56   | 7.83E-16 | 1.63E-12 |
| hsa-mir-29b-3p  | -5.46            | 5.99   | 1.85E-15 | 2.56E-12 |
| ENST00000474173 | -9.95            | 4.25   | 7.09E-15 | 7.34E-12 |
| hsa-mir-32-5p   | -5.48            | 7.42   | 8.85E-15 | 7.34E-12 |
| hsa-mir-142-3p  | -4.62            | 10.47  | 1.77E-13 | 1.23E-10 |
| ENST00000500868 | -6.60            | 3.74   | 5.53E-12 | 3.28E-09 |
| ENST00000500633 | -6.57            | 3.71   | 7.75E-12 | 4.02E-09 |
| hsa-mir-3656-3p | -9.66            | 4.01   | 2.28E-11 | 1.05E-08 |
| ENST00000499697 | -5.03            | 4.03   | 2.64E-10 | 9.97E-08 |
| ENST00000498989 | -4.61            | 4.40   | 3.78E-10 | 1.25E-07 |
| ENST00000500011 | -5.20            | 4.40   | 1.88E-09 | 5.57E-07 |
| hsa-mir-210-5p  | -7.79            | 2.35   | 3.12E-09 | 8.55E-07 |
| hsa-mir-34c-5p  | -7.76            | 2.32   | 3.30E-09 | 8.55E-07 |
| hsa-mir-218-5p  | -5.28            | 2.58   | 3.92E-09 | 9.56E-07 |
| ENST00000501638 | -4.61            | 3.26   | 4.16E-09 | 9.59E-07 |
| hsa-mir-212-3p  | -5.02            | 3.17   | 5.03E-09 | 1.05E-06 |
| ENST00000500409 | -5.57            | 2.86   | 5.06E-09 | 1.05E-06 |
| ENST00000501230 | -4.65            | 3.71   | 7.25E-09 | 1.43E-06 |
| hsa-mir-10b-5p  | -5.43            | 2.74   | 1.33E-08 | 2.25E-06 |
| ENST00000384148 | 3.83             | 1.75   | 2.20E-08 | 3.26E-06 |
| ENST00000500340 | -4.55            | 2.74   | 2.96E-08 | 3.96E-06 |
| ENST00000487032 | -4.88            | 2.26   | 3.20E-08 | 4.15E-06 |
| hsa-mir-3179-3p | 3.39             | 1.65   | 8.68E-08 | 9.73E-06 |
| ENST00000363443 | -4.61            | 2.04   | 9.67E-08 | 1.06E-05 |
| ENST00000499746 | -4.64            | 2.07   | 1.12E-07 | 1.19E-05 |
| ENST00000364915 | 4.86             | 11.05  | 1.24E-07 | 1.24E-05 |
| ENST00000471237 | 1.78             | 16.61  | 1.29E-07 | 1.24E-05 |
| ENST00000489413 | 5.42             | 1.52   | 1.41E-07 | 1.33E-05 |
| hsa-mir-362-3p  | -4.94            | 2.33   | 2.10E-07 | 1.92E-05 |
| ENST00000364931 | 3.72             | 6.32   | 2.13E-07 | 1.92E-05 |
| ENST00000363549 | 4.96             | 1.17   | 2.22E-07 | 1.96E-05 |

|                 |       |       |          |           |
|-----------------|-------|-------|----------|-----------|
| ENST00000500066 | -4.75 | 2.17  | 2.66E-07 | 2.25E-05  |
| ENST00000500656 | 3.30  | 4.35  | 2.75E-07 | 2.28E-05  |
| ENST00000500845 | -4.48 | 1.94  | 3.69E-07 | 2.89E-05  |
| ENST00000363367 | 2.99  | 2.77  | 4.29E-07 | 3.23E-05  |
| ENST00000501386 | -4.68 | 2.11  | 5.39E-07 | 3.92E-05  |
| ENST00000498132 | 2.95  | 1.89  | 5.54E-07 | 3.96E-05  |
| ENST00000499637 | 2.82  | 1.63  | 8.91E-07 | 5.87E-05  |
| ENST00000458848 | 2.94  | 2.18  | 1.63E-06 | 9.93E-05  |
| ENST00000502220 | 2.83  | 1.96  | 2.99E-06 | 0.0001723 |
| ENST00000470561 | 2.84  | 8.18  | 4.97E-06 | 0.0002679 |
| ENST00000459424 | 2.71  | 2.93  | 6.26E-06 | 0.0003248 |
| ENST00000408564 | 2.78  | 2.87  | 6.70E-06 | 0.0003431 |
| ENST00000365574 | 2.88  | 5.75  | 7.62E-06 | 0.0003519 |
| ENST00000384314 | 2.96  | 3.87  | 7.63E-06 | 0.0003519 |
| ENST00000364572 | 3.27  | 1.33  | 8.11E-06 | 0.0003656 |
| ENST00000384273 | 3.21  | 1.72  | 8.73E-06 | 0.0003814 |
| ENST00000501131 | 5.23  | 5.04  | 9.32E-06 | 0.000394  |
| hsa-mir-1304-5p | 2.62  | 2.68  | 9.93E-06 | 0.0004078 |
| ENST00000365467 | 2.57  | 3.28  | 1.05E-05 | 0.0004232 |
| ENST00000463508 | 1.59  | 16.21 | 1.08E-05 | 0.0004319 |
| ENST00000384084 | 2.72  | 3.95  | 1.11E-05 | 0.0004391 |
| ENST00000364784 | 2.55  | 3.09  | 1.16E-05 | 0.0004549 |
| ENST00000384106 | 3.24  | 3.11  | 1.19E-05 | 0.0004563 |
| ENST00000362808 | 3.01  | 11.12 | 1.20E-05 | 0.0004563 |
| ENST00000362881 | 3.14  | 2.39  | 1.26E-05 | 0.0004768 |
| ENST00000363299 | 2.58  | 6.05  | 1.31E-05 | 0.0004866 |
| ENST00000383873 | 2.84  | 3.41  | 1.31E-05 | 0.0004866 |
| ENST00000363250 | 3.36  | 2.81  | 1.46E-05 | 0.0005371 |
| ENST00000384741 | 2.98  | 1.58  | 1.50E-05 | 0.0005435 |
| ENST00000384743 | 2.92  | 4.02  | 1.51E-05 | 0.0005435 |
| ENST00000364542 | 2.73  | 4.11  | 1.58E-05 | 0.0005654 |
| hsa-mir-4301-5p | 3.54  | 2.26  | 1.59E-05 | 0.0005654 |
| ENST00000365439 | 2.70  | 1.55  | 1.66E-05 | 0.0005789 |
| ENST00000384650 | 2.72  | 1.87  | 1.68E-05 | 0.0005825 |
| ENST00000384547 | 3.00  | 1.79  | 1.77E-05 | 0.0006058 |
| ENST00000362507 | 2.88  | 6.90  | 1.88E-05 | 0.0006278 |
| ENST00000384413 | 2.70  | 7.24  | 2.12E-05 | 0.0007023 |
| hsa-mir-942-5p  | 2.48  | 4.42  | 2.27E-05 | 0.0007362 |
| ENST00000362423 | 2.25  | 6.06  | 2.49E-05 | 0.0007891 |
| hsa-mir-33a-3p  | -4.35 | 1.87  | 2.51E-05 | 0.0007891 |
| ENST00000499204 | -6.41 | 1.23  | 2.55E-05 | 0.0007906 |
| ENST00000500894 | 2.54  | 7.69  | 2.68E-05 | 0.0008182 |

|                 |       |       |          |           |
|-----------------|-------|-------|----------|-----------|
| ENST00000499768 | -6.36 | 1.19  | 2.82E-05 | 0.0008545 |
| ENST00000384172 | 2.79  | 3.84  | 2.90E-05 | 0.000865  |
| ENST00000476850 | 3.02  | 3.81  | 2.92E-05 | 0.000865  |
| ENST00000362477 | 2.74  | 13.63 | 3.17E-05 | 0.0009074 |
| ENST00000384585 | 3.45  | 6.77  | 3.27E-05 | 0.0009279 |
| ENST00000500576 | -6.69 | 1.43  | 3.39E-05 | 0.000958  |
| ENST00000458981 | 3.08  | 3.16  | 3.44E-05 | 0.0009647 |
| ENST00000408749 | 2.41  | 5.01  | 3.50E-05 | 0.0009737 |
| ENST00000384007 | 2.81  | 4.74  | 3.52E-05 | 0.0009749 |
| ENST00000387943 | 2.38  | 5.02  | 3.61E-05 | 0.0009924 |
| ENST00000364234 | 2.39  | 2.77  | 3.71E-05 | 0.0010067 |
| ENST00000365537 | 3.18  | 2.97  | 3.80E-05 | 0.0010144 |
| ENST00000363696 | 2.36  | 2.11  | 4.03E-05 | 0.0010644 |
| ENST00000365037 | -6.31 | 1.16  | 4.31E-05 | 0.0011    |
| ENST00000365606 | 3.07  | 1.16  | 4.32E-05 | 0.0011    |
| ENST00000365312 | 3.38  | 2.98  | 4.35E-05 | 0.0011    |
| ENST00000384637 | 2.86  | 3.52  | 4.48E-05 | 0.0011239 |
| ENST00000365666 | 3.03  | 4.03  | 4.50E-05 | 0.0011239 |
| ENST00000384178 | 2.34  | 5.44  | 4.67E-05 | 0.0011609 |
| ENST00000485528 | 2.82  | 3.05  | 4.76E-05 | 0.0011751 |
| ENST00000362698 | 2.30  | 12.33 | 4.79E-05 | 0.0011753 |
| ENST00000384245 | 2.57  | 3.44  | 4.98E-05 | 0.0012036 |
| ENST00000363444 | 2.65  | 7.42  | 4.99E-05 | 0.0012036 |
| ENST00000363462 | 2.66  | 4.23  | 4.99E-05 | 0.0012036 |
| ENST00000384205 | 2.59  | 3.84  | 5.48E-05 | 0.0012915 |
| ENST00000499762 | 2.79  | 1.21  | 5.81E-05 | 0.0013467 |
| ENST00000459194 | 2.52  | 2.10  | 5.89E-05 | 0.0013579 |
| ENST00000383948 | 2.63  | 3.36  | 6.08E-05 | 0.0013926 |
| ENST00000364628 | 2.67  | 4.54  | 6.38E-05 | 0.0014552 |
| ENST00000384604 | 2.89  | 3.49  | 6.52E-05 | 0.0014783 |
| ENST00000364358 | 2.72  | 3.93  | 6.81E-05 | 0.0015182 |
| ENST00000365484 | 2.58  | 8.74  | 6.96E-05 | 0.0015211 |
| ENST00000501173 | 2.59  | 1.48  | 6.99E-05 | 0.0015211 |
| ENST00000384619 | 2.32  | 9.62  | 7.04E-05 | 0.0015211 |
| ENST00000384530 | 3.09  | 2.72  | 7.47E-05 | 0.001581  |
| ENST00000481391 | 2.67  | 1.15  | 7.63E-05 | 0.0016026 |
| ENST00000363977 | 3.09  | 3.04  | 7.66E-05 | 0.0016026 |
| ENST00000501074 | 5.20  | 8.31  | 7.69E-05 | 0.0016026 |
| ENST00000501998 | 3.08  | 1.16  | 8.08E-05 | 0.00166   |
| ENST00000365599 | 2.93  | 3.79  | 8.14E-05 | 0.0016637 |
| hsa-mir-3173-5p | 2.67  | 1.14  | 8.40E-05 | 0.0016924 |
| ENST00000384026 | 2.70  | 1.36  | 8.56E-05 | 0.0017041 |

|                 |       |       |           |           |
|-----------------|-------|-------|-----------|-----------|
| ENST00000384385 | 2.46  | 2.58  | 8.58E-05  | 0.0017041 |
| ENST00000411404 | 2.64  | 8.90  | 9.14E-05  | 0.0017911 |
| hsa-mir-146b-5p | 2.01  | 12.84 | 9.34E-05  | 0.0018116 |
| ENST00000384577 | 2.97  | 2.85  | 9.60E-05  | 0.001844  |
| hsa-mir-1254-5p | 2.22  | 3.39  | 0.0001007 | 0.0018999 |
| ENST00000410462 | 2.41  | 1.79  | 0.0001039 | 0.0019415 |
| ENST00000384161 | 2.31  | 2.87  | 0.0001054 | 0.0019618 |
| ENST00000383898 | 2.46  | 3.75  | 0.0001076 | 0.0019838 |
| ENST00000363435 | 2.44  | 2.13  | 0.0001105 | 0.0020237 |
| ENST00000363286 | 2.14  | 12.35 | 0.0001112 | 0.0020238 |
| ENST00000482497 | 3.89  | 10.49 | 0.0001151 | 0.0020759 |
| ENST00000365604 | 2.82  | 2.38  | 0.0001195 | 0.0021444 |
| ENST00000362591 | 2.21  | 5.66  | 0.0001205 | 0.0021444 |
| hsa-mir-31-5p   | -6.76 | 1.45  | 0.0001209 | 0.0021444 |
| ENST00000383895 | 5.35  | 8.30  | 0.0001228 | 0.0021489 |
| ENST00000365341 | 2.54  | 4.27  | 0.0001283 | 0.0022322 |
| ENST00000365532 | 2.51  | 2.05  | 0.0001291 | 0.0022322 |
| ENST00000387069 | 2.28  | 10.27 | 0.0001303 | 0.0022429 |
| ENST00000362352 | 2.27  | 5.66  | 0.0001356 | 0.0023063 |
| ENST00000364102 | 2.41  | 4.33  | 0.0001427 | 0.0024074 |
| ENST00000384633 | 2.71  | 4.02  | 0.0001506 | 0.0025095 |
| ENST00000384630 | 2.71  | 1.39  | 0.0001514 | 0.0025119 |
| ENST00000384563 | 2.65  | 3.93  | 0.0001636 | 0.0026718 |
| ENST00000363636 | 2.17  | 6.49  | 0.0001715 | 0.0027621 |
| ENST00000362353 | 2.17  | 5.69  | 0.0001718 | 0.0027621 |
| ENST00000362562 | 2.16  | 2.20  | 0.0001719 | 0.0027621 |
| ENST00000487060 | 2.35  | 5.14  | 0.0001724 | 0.0027621 |
| ENST00000363624 | 2.11  | 6.45  | 0.0001793 | 0.0028611 |
| ENST00000384323 | 2.02  | 5.69  | 0.0001815 | 0.0028761 |
| ENST00000411187 | 2.82  | 1.27  | 0.0001816 | 0.0028761 |
| ENST00000384589 | 2.61  | 1.31  | 0.0001927 | 0.0030163 |
| ENST00000365085 | 2.20  | 6.38  | 0.0001934 | 0.0030167 |
| ENST00000364164 | 2.44  | 4.25  | 0.0001943 | 0.0030199 |
| hsa-mir-146b-3p | 2.32  | 4.32  | 0.0001994 | 0.0030812 |
| ENST00000384781 | 2.80  | 3.49  | 0.0001998 | 0.0030812 |
| ENST00000363190 | 2.86  | 1.22  | 0.0002153 | 0.0032843 |
| ENST00000384744 | 2.04  | 5.80  | 0.0002252 | 0.0034226 |
| ENST00000384776 | 2.49  | 3.60  | 0.000226  | 0.0034228 |
| ENST00000391154 | 2.11  | 4.71  | 0.00023   | 0.0034454 |
| ENST00000362862 | 2.23  | 5.53  | 0.0002329 | 0.0034753 |
| ENST00000391172 | 2.23  | 3.69  | 0.0002345 | 0.0034753 |
| ENST00000365160 | 2.64  | 7.65  | 0.0002383 | 0.0035061 |

|                 |      |       |           |           |
|-----------------|------|-------|-----------|-----------|
| ENST00000459189 | 2.04 | 6.57  | 0.0002421 | 0.0035498 |
| ENST00000497848 | 1.92 | 5.70  | 0.0002484 | 0.0036284 |
| ENST00000384527 | 2.48 | 3.24  | 0.0002498 | 0.0036349 |
| ENST00000499508 | 1.98 | 6.37  | 0.0002506 | 0.0036349 |
| ENST00000496399 | 1.70 | 13.26 | 0.0002687 | 0.0038713 |
| ENST00000384281 | 2.15 | 4.62  | 0.0002773 | 0.0039137 |
| ENST00000364641 | 2.38 | 4.28  | 0.000281  | 0.0039162 |
| ENST00000384534 | 2.34 | 2.67  | 0.0002879 | 0.0039817 |
| ENST00000383934 | 2.58 | 1.80  | 0.0003333 | 0.0045491 |
| ENST00000362710 | 2.40 | 5.26  | 0.000339  | 0.0045843 |
| ENST00000363455 | 2.11 | 2.31  | 0.0003394 | 0.0045843 |
| ENST00000384793 | 2.24 | 3.73  | 0.0003403 | 0.0045843 |
| ENST00000363899 | 2.14 | 5.53  | 0.0003746 | 0.004966  |
| ENST00000383924 | 1.91 | 5.24  | 0.0003812 | 0.0050364 |
| ENST00000362354 | 2.22 | 5.16  | 0.0003834 | 0.0050398 |
| ENST00000365075 | 2.18 | 1.63  | 0.0003851 | 0.0050398 |
| ENST00000384001 | 2.22 | 5.03  | 0.0003899 | 0.0050717 |
| ENST00000384127 | 2.63 | 3.80  | 0.0003946 | 0.0051001 |
| ENST00000410624 | 2.16 | 5.29  | 0.0003967 | 0.0051119 |
| ENST00000364337 | 2.57 | 2.66  | 0.0004074 | 0.0052336 |
| ENST00000411164 | 2.03 | 2.29  | 0.0004103 | 0.005249  |
| ENST00000384716 | 2.18 | 3.81  | 0.0004112 | 0.005249  |
| ENST00000383913 | 2.74 | 3.59  | 0.0004317 | 0.0054945 |
| ENST00000364432 | 3.07 | 7.17  | 0.0004369 | 0.0055429 |
| ENST00000459107 | 2.22 | 5.01  | 0.0004416 | 0.0055862 |
| ENST00000500112 | 2.04 | 3.34  | 0.0004462 | 0.0056099 |
| ENST00000384341 | 2.05 | 5.74  | 0.000465  | 0.0058116 |
| ENST00000363372 | 2.21 | 1.51  | 0.000468  | 0.0058242 |
| ENST00000471506 | 2.17 | 5.04  | 0.0004689 | 0.0058242 |
| ENST00000362697 | 2.12 | 5.23  | 0.0005105 | 0.006267  |
| hsa-mir-4521-5p | 2.09 | 1.45  | 0.0005336 | 0.0064929 |
| ENST00000384750 | 2.11 | 5.05  | 0.000558  | 0.0067296 |
| ENST00000486830 | 2.68 | 13.86 | 0.0005653 | 0.0067989 |
| hsa-mir-4420-3p | 1.97 | 2.91  | 0.0005922 | 0.0070811 |
| ENST00000365498 | 2.16 | 5.14  | 0.0006026 | 0.0071847 |
| ENST00000384238 | 2.17 | 3.84  | 0.0006255 | 0.0073349 |
| ENST00000500700 | 1.82 | 1.81  | 0.0006288 | 0.0073495 |
| ENST00000364950 | 2.12 | 7.04  | 0.0006372 | 0.007385  |
| ENST00000365663 | 3.48 | 3.32  | 0.000653  | 0.0074961 |
| ENST00000408175 | 2.02 | 1.50  | 0.0006575 | 0.0075148 |
| ENST00000384483 | 2.68 | 3.57  | 0.0006783 | 0.0077308 |
| ENST00000364596 | 2.10 | 4.66  | 0.0006801 | 0.0077308 |

|                  |      |      |           |           |
|------------------|------|------|-----------|-----------|
| ENST00000365625  | 2.13 | 4.98 | 0.0006898 | 0.0078191 |
| ENST00000384388  | 2.78 | 2.88 | 0.0007239 | 0.0081465 |
| ENST00000384240  | 2.13 | 5.08 | 0.0007291 | 0.0081465 |
| ENST00000502243  | 2.40 | 2.84 | 0.0007319 | 0.0081465 |
| ENST00000365462  | 2.09 | 4.61 | 0.000769  | 0.0085088 |
| ENST00000411366  | 2.08 | 5.27 | 0.0007691 | 0.0085088 |
| ENST00000383919  | 2.03 | 1.72 | 0.000781  | 0.0086185 |
| ENST00000459329  | 2.14 | 2.25 | 0.0007854 | 0.0086438 |
| ENST00000408454  | 1.87 | 4.71 | 0.0008068 | 0.0088553 |
| hsa-mir-1273h-5p | 2.08 | 2.01 | 0.0008308 | 0.0090949 |
| ENST00000363894  | 2.14 | 4.38 | 0.0008678 | 0.0094501 |
| hsa-mir-92a-5p   | 1.99 | 8.24 | 0.0008703 | 0.0094528 |
| ENST00000365197  | 2.56 | 3.58 | 0.0008823 | 0.0095327 |
| ENST00000363640  | 2.02 | 6.62 | 0.0008906 | 0.0095974 |
| ENST00000365068  | 1.99 | 5.32 | 0.000915  | 0.0098096 |
| ENST00000362915  | 3.36 | 6.13 | 0.0009176 | 0.0098123 |
| ENST00000363651  | 1.99 | 5.89 | 0.0009352 | 0.0099746 |
| ENST00000384504  | 1.94 | 1.68 | 0.0009458 | 0.0100618 |
| ENST00000498916  | 3.80 | 3.58 | 0.0009858 | 0.0103811 |
| ENST00000363674  | 2.04 | 5.08 | 0.0009923 | 0.0103969 |
| ENST00000384254  | 2.62 | 2.88 | 0.0010217 | 0.0106237 |
| ENST00000499152  | 1.88 | 1.55 | 0.0010301 | 0.0106851 |
| ENST00000363985  | 1.92 | 5.62 | 0.0010378 | 0.0107378 |
| ENST00000365487  | 2.30 | 3.05 | 0.0010621 | 0.0109075 |
| hsa-mir-1273h-3p | 1.87 | 4.25 | 0.0010801 | 0.0110455 |
| ENST00000363248  | 2.04 | 5.29 | 0.0010815 | 0.0110455 |
| hsa-mir-183-5p   | 1.81 | 5.24 | 0.0010872 | 0.011056  |
| ENST00000384248  | 2.25 | 3.49 | 0.0011232 | 0.0113386 |
| ENST00000383994  | 2.09 | 4.44 | 0.0011323 | 0.0114027 |
| ENST00000384677  | 1.85 | 2.81 | 0.0011695 | 0.0116925 |
| ENST00000500169  | 2.74 | 1.37 | 0.0011887 | 0.0117984 |
| ENST00000362412  | 2.38 | 4.58 | 0.0012274 | 0.0121456 |
| ENST00000384376  | 2.59 | 2.60 | 0.0012546 | 0.0123083 |
| ENST00000384762  | 2.44 | 5.43 | 0.0012549 | 0.0123083 |
| ENST00000364805  | 2.04 | 8.43 | 0.0012887 | 0.0125517 |
| ENST00000362918  | 2.03 | 5.27 | 0.0013057 | 0.0126762 |
| ENST00000384373  | 2.13 | 4.43 | 0.00132   | 0.0127072 |
| ENST00000364407  | 2.02 | 4.57 | 0.0013457 | 0.0128945 |
| ENST00000458898  | 2.05 | 2.30 | 0.0013522 | 0.0129274 |
| ENST00000470693  | 1.94 | 1.36 | 0.0013741 | 0.0130757 |
| ENST00000390872  | 1.95 | 6.00 | 0.0013855 | 0.0131543 |
| ENST00000363389  | 1.84 | 5.70 | 0.0014162 | 0.013385  |

|                 |      |       |           |           |
|-----------------|------|-------|-----------|-----------|
| ENST00000363880 | 1.92 | 5.98  | 0.00145   | 0.0136418 |
| hsa-mir-191-3p  | 1.68 | 5.21  | 0.0015924 | 0.0148473 |
| ENST00000384627 | 2.16 | 3.82  | 0.0016033 | 0.014915  |
| ENST00000410868 | 1.82 | 1.74  | 0.0016209 | 0.015045  |
| ENST00000384268 | 1.96 | 5.34  | 0.0016406 | 0.0151301 |
| ENST00000362512 | 2.63 | 9.09  | 0.0016762 | 0.0154202 |
| ENST00000410494 | 1.79 | 2.26  | 0.0016898 | 0.0155106 |
| ENST00000384753 | 1.94 | 5.31  | 0.0017086 | 0.0156489 |
| ENST00000384087 | 1.79 | 4.86  | 0.0017426 | 0.0158904 |
| ENST00000363963 | 1.78 | 5.25  | 0.001775  | 0.0160448 |
| ENST00000384708 | 1.86 | 2.25  | 0.0017866 | 0.0161144 |
| ENST00000483314 | 3.27 | 7.01  | 0.0018051 | 0.0162462 |
| ENST00000362692 | 1.94 | 2.67  | 0.0018537 | 0.01654   |
| ENST00000461728 | 3.29 | 7.01  | 0.001865  | 0.0165924 |
| ENST00000458930 | 1.80 | 10.16 | 0.0018705 | 0.0165924 |
| ENST00000363872 | 1.98 | 4.51  | 0.0018816 | 0.0165924 |
| ENST00000408082 | 1.82 | 4.86  | 0.001883  | 0.0165924 |
| ENST00000364018 | 1.83 | 5.45  | 0.0018913 | 0.0165924 |
| ENST00000458932 | 1.93 | 2.16  | 0.0018916 | 0.0165924 |
| ENST00000390904 | 3.45 | 4.12  | 0.0019491 | 0.0168498 |
| ENST00000384416 | 1.69 | 6.58  | 0.0019807 | 0.0170142 |
| ENST00000363836 | 2.07 | 4.28  | 0.0020137 | 0.0172264 |
| ENST00000363171 | 1.93 | 5.36  | 0.0020407 | 0.0173662 |
| ENST00000384078 | 1.98 | 2.65  | 0.0020465 | 0.0173662 |
| ENST00000384737 | 2.39 | 3.21  | 0.0020468 | 0.0173662 |
| ENST00000484776 | 2.17 | 7.85  | 0.0020528 | 0.0173821 |
| ENST00000468731 | 2.40 | 3.88  | 0.00213   | 0.017999  |
| ENST00000391033 | 1.73 | 5.23  | 0.002144  | 0.0180801 |
| ENST00000471029 | 2.01 | 4.44  | 0.0021502 | 0.0180959 |
| ENST00000384297 | 1.86 | 5.39  | 0.0021792 | 0.0183023 |
| ENST00000364879 | 1.71 | 5.07  | 0.0021945 | 0.0183566 |
| ENST00000384653 | 1.89 | 5.36  | 0.0022483 | 0.018703  |
| ENST00000383874 | 2.41 | 2.64  | 0.0023289 | 0.0193048 |
| ENST00000363331 | 2.14 | 7.90  | 0.0023727 | 0.0196103 |
| ENST00000384749 | 2.15 | 1.96  | 0.0023963 | 0.0197269 |
| ENST00000480363 | 2.28 | 4.80  | 0.0024127 | 0.019822  |
| ENST00000384067 | 1.68 | 6.67  | 0.0024722 | 0.0202059 |
| ENST00000384090 | 2.03 | 1.43  | 0.0024985 | 0.0203663 |
| ENST00000362721 | 2.02 | 1.51  | 0.0025508 | 0.0207023 |
| hsa-mir-6747-3p | 1.66 | 2.59  | 0.0025797 | 0.0208641 |
| ENST00000384097 | 1.88 | 5.36  | 0.0026104 | 0.0210299 |
| ENST00000384136 | 1.75 | 5.01  | 0.0026468 | 0.0212751 |

|                 |      |       |           |           |
|-----------------|------|-------|-----------|-----------|
| ENST00000383990 | 1.88 | 5.30  | 0.0026511 | 0.0212751 |
| ENST00000411192 | 1.82 | 8.02  | 0.0026771 | 0.0214428 |
| ENST00000383978 | 1.88 | 5.32  | 0.0026935 | 0.0215321 |
| ENST00000458975 | 1.80 | 5.23  | 0.0026987 | 0.0215328 |
| ENST00000410344 | 1.96 | 7.91  | 0.0027706 | 0.0220632 |
| ENST00000384210 | 2.41 | 1.34  | 0.0027812 | 0.0220632 |
| ENST00000363750 | 2.33 | 2.20  | 0.0029619 | 0.0231868 |
| ENST00000384419 | 1.95 | 4.42  | 0.0029791 | 0.0232686 |
| ENST00000384656 | 1.84 | 5.38  | 0.0029836 | 0.0232686 |
| ENST00000384187 | 1.86 | 5.30  | 0.0030008 | 0.0233587 |
| ENST00000475628 | 1.83 | 9.64  | 0.0030853 | 0.0239266 |
| ENST00000419895 | 2.06 | 1.12  | 0.0031066 | 0.0240471 |
| ENST00000365571 | 1.36 | 13.03 | 0.0031172 | 0.0240841 |
| ENST00000363548 | 1.86 | 1.30  | 0.0033021 | 0.0251846 |
| ENST00000363094 | 1.85 | 1.60  | 0.0033264 | 0.0252807 |
| ENST00000363925 | 2.23 | 5.66  | 0.0034082 | 0.0257099 |
| ENST00000384119 | 1.82 | 5.36  | 0.0034368 | 0.0258322 |
| ENST00000384600 | 2.15 | 2.57  | 0.0034567 | 0.0259347 |
| ENST00000391196 | 1.71 | 2.81  | 0.0034761 | 0.0260328 |
| ENST00000365672 | 1.53 | 1.72  | 0.0036987 | 0.027502  |
| ENST00000364916 | 1.68 | 5.53  | 0.003706  | 0.0275069 |
| ENST00000493125 | 1.83 | 2.29  | 0.0037154 | 0.0275275 |
| ENST00000502192 | 1.72 | 2.49  | 0.0037232 | 0.0275355 |
| ENST00000364535 | 1.75 | 6.84  | 0.0037707 | 0.0278374 |
| ENST00000363660 | 1.56 | 4.91  | 0.0038336 | 0.0282515 |
| ENST00000363068 | 1.56 | 5.71  | 0.0038435 | 0.0282744 |
| ENST00000501338 | 2.54 | 2.45  | 0.0038544 | 0.0282928 |
| ENST00000365063 | 1.63 | 4.85  | 0.0038626 | 0.0282928 |
| ENST00000384344 | 2.21 | 3.12  | 0.0039043 | 0.0282928 |
| ENST00000365030 | 1.56 | 5.77  | 0.0040151 | 0.0289923 |
| ENST00000384567 | 1.61 | 5.65  | 0.004018  | 0.0289923 |
| ENST00000459367 | 1.83 | 4.73  | 0.0040364 | 0.0290749 |
| ENST00000362695 | 2.27 | 1.60  | 0.0040782 | 0.0293252 |
| ENST00000364251 | 1.62 | 4.73  | 0.0041116 | 0.029514  |
| ENST00000410290 | 1.57 | 4.98  | 0.0041538 | 0.0297655 |
| ENST00000384010 | 1.57 | 10.25 | 0.0041739 | 0.0298575 |
| ENST00000410694 | 1.88 | 8.00  | 0.004198  | 0.029876  |
| ENST00000384782 | 1.57 | 10.25 | 0.0043117 | 0.0306319 |
| ENST00000383886 | 2.28 | 2.48  | 0.0043887 | 0.0310759 |
| ENST00000383861 | 1.56 | 10.25 | 0.0043891 | 0.0310759 |
| ENST00000458811 | 1.82 | 9.09  | 0.0044202 | 0.0312188 |
| ENST00000383925 | 1.57 | 10.25 | 0.0044282 | 0.0312188 |



|                 |      |       |           |           |
|-----------------|------|-------|-----------|-----------|
| ENST00000364228 | 1.40 | 12.12 | 0.0044319 | 0.0312188 |
| ENST00000483592 | 1.84 | 2.06  | 0.004482  | 0.0313465 |
| ENST00000365208 | 1.66 | 4.62  | 0.0044878 | 0.0313465 |
| ENST00000384278 | 1.56 | 10.25 | 0.0045088 | 0.0314407 |
| ENST00000362421 | 1.72 | 5.55  | 0.0045942 | 0.0319285 |
| ENST00000390910 | 1.79 | 3.18  | 0.0046244 | 0.0320844 |
| ENST00000363421 | 1.60 | 6.86  | 0.0046552 | 0.0322445 |
| ENST00000383869 | 1.55 | 10.25 | 0.0047548 | 0.0328171 |
| ENST00000363271 | 1.68 | 9.23  | 0.0047616 | 0.0328171 |
| ENST00000410557 | 1.60 | 4.84  | 0.0047902 | 0.032878  |
| ENST00000384659 | 1.55 | 10.25 | 0.0047935 | 0.032878  |
| ENST00000384135 | 1.62 | 2.39  | 0.0047942 | 0.032878  |
| ENST00000411009 | 2.42 | 2.04  | 0.0048193 | 0.032941  |
| ENST00000364348 | 1.67 | 2.14  | 0.0048353 | 0.0329961 |
| ENST00000459508 | 1.72 | 5.52  | 0.0049046 | 0.0333886 |
| ENST00000410794 | 1.78 | 7.61  | 0.0049089 | 0.0333886 |
| ENST00000383860 | 2.04 | 2.93  | 0.0049234 | 0.0334323 |
| ENST00000363858 | 2.61 | 2.72  | 0.0050306 | 0.0340489 |
| ENST00000362931 | 1.55 | 5.40  | 0.0050775 | 0.0343105 |
| ENST00000501144 | 2.90 | 3.74  | 0.0051282 | 0.0345323 |
| ENST00000391084 | 2.07 | 6.86  | 0.0051296 | 0.0345323 |
| ENST00000364308 | 1.47 | 5.89  | 0.0051353 | 0.0345323 |
| ENST00000363552 | 1.87 | 4.23  | 0.0051716 | 0.0347198 |
| ENST00000384436 | 1.56 | 3.44  | 0.0051865 | 0.0347641 |
| ENST00000364113 | 1.50 | 6.49  | 0.0052398 | 0.0350647 |
| ENST00000390895 | 1.57 | 6.87  | 0.0053223 | 0.0355379 |
| ENST00000383890 | 1.49 | 1.61  | 0.0053277 | 0.0355379 |
| ENST00000485481 | 1.54 | 5.08  | 0.0054041 | 0.0358746 |
| ENST00000384138 | 1.73 | 5.40  | 0.0054267 | 0.0359672 |
| hsa-mir-4746-5p | 1.54 | 2.84  | 0.0054503 | 0.0360662 |
| ENST00000384541 | 1.49 | 5.06  | 0.0056341 | 0.0371044 |
| hsa-mir-744-5p  | 1.46 | 6.27  | 0.005999  | 0.0390522 |
| ENST00000364128 | 1.69 | 2.51  | 0.0060266 | 0.0391303 |
| ENST00000384626 | 1.82 | 1.25  | 0.00607   | 0.0393508 |
| ENST00000411315 | 1.62 | 5.48  | 0.0061547 | 0.0397754 |
| ENST00000481967 | 1.56 | 5.69  | 0.0062761 | 0.0404967 |
| ENST00000495498 | 1.74 | 4.72  | 0.0063703 | 0.0407248 |
| ENST00000444141 | 1.56 | 2.00  | 0.0063831 | 0.0407439 |
| hsa-mir-182-5p  | 1.53 | 4.70  | 0.0065326 | 0.0414432 |
| ENST00000362680 | 1.62 | 2.03  | 0.0066602 | 0.042124  |
| ENST00000497631 | 1.71 | 4.78  | 0.0068492 | 0.0429913 |
| ENST00000363186 | 1.60 | 5.14  | 0.0068724 | 0.0430718 |

|                 |      |       |           |           |
|-----------------|------|-------|-----------|-----------|
| ENST00000459124 | 1.41 | 6.03  | 0.0069123 | 0.0432119 |
| ENST00000499566 | 2.03 | 9.07  | 0.0069156 | 0.0432119 |
| hsa-mir-296-3p  | 1.40 | 6.09  | 0.0069758 | 0.0434574 |
| ENST00000410129 | 1.49 | 2.85  | 0.0070702 | 0.0439135 |
| ENST00000496990 | 1.63 | 2.22  | 0.007156  | 0.044314  |
| ENST00000386062 | 1.62 | 7.91  | 0.0071877 | 0.0444436 |
| hsa-mir-33b-3p  | 1.49 | 2.19  | 0.0072255 | 0.0446111 |
| ENST00000362540 | 1.50 | 5.97  | 0.007265  | 0.0447217 |
| ENST00000459577 | 1.55 | 4.34  | 0.0072914 | 0.0448046 |
| ENST00000459229 | 1.61 | 2.43  | 0.0073067 | 0.0448046 |
| ENST00000498878 | 1.50 | 3.14  | 0.0073132 | 0.0448046 |
| ENST00000364938 | 1.52 | 6.08  | 0.0073897 | 0.0448532 |
| ENST00000459041 | 1.54 | 1.74  | 0.0074958 | 0.0453353 |
| ENST00000501043 | 2.98 | 5.47  | 0.0075302 | 0.0453969 |
| ENST00000484771 | 1.90 | 10.95 | 0.0076261 | 0.0456575 |
| ENST00000410205 | 1.59 | 5.03  | 0.0078392 | 0.0464505 |
| hsa-mir-1307-3p | 1.45 | 10.13 | 0.0083312 | 0.04903   |
| ENST00000362765 | 1.49 | 5.89  | 0.0083873 | 0.0491509 |
| ENST00000364829 | 1.74 | 1.44  | 0.008468  | 0.0495541 |

**Supplementary Table S8B: Differential expression analysis of human miRNA genes from neuronal stem cells infected with *T. gondii* EGS strain for 18 hours.**

| gene_ID         | logFC (cont-inf) | logCPM     | PValue   | FDR      |
|-----------------|------------------|------------|----------|----------|
| ENST00000492060 | -4.4355792       | 11.0111788 | 1.52E-60 | 4.14E-57 |
| ENST00000498989 | -9.2695105       | 7.00067438 | 1.29E-54 | 1.76E-51 |
| ENST00000500340 | -10.643292       | 4.96497887 | 2.80E-33 | 2.55E-30 |
| ENST00000461045 | -3.0038328       | 13.0904557 | 1.02E-32 | 6.94E-30 |
| ENST00000500868 | -8.0484456       | 4.99815291 | 3.57E-31 | 1.95E-28 |
| ENST00000474075 | -2.9638692       | 8.76338968 | 9.99E-28 | 4.53E-25 |
| ENST00000362507 | 5.44517806       | 5.84437929 | 1.67E-27 | 6.51E-25 |
| ENST00000499746 | -9.7849844       | 4.15662322 | 4.07E-27 | 1.39E-24 |
| ENST00000500663 | -6.3725225       | 4.22604382 | 8.17E-27 | 2.47E-24 |
| ENST00000486682 | -7.1880398       | 4.16983392 | 2.56E-26 | 6.97E-24 |
| ENST00000501999 | -5.482546        | 5.21677565 | 8.44E-26 | 2.09E-23 |
| ENST00000501119 | -5.0419309       | 5.75012147 | 1.14E-25 | 2.58E-23 |
| ENST00000478115 | -3.5662645       | 7.50197233 | 1.24E-25 | 2.61E-23 |
| ENST00000474173 | -10.135384       | 4.47863028 | 3.55E-24 | 6.90E-22 |
| ENST00000501638 | -6.9014743       | 3.90421218 | 7.42E-24 | 1.35E-21 |
| ENST00000501386 | -6.828526        | 3.83771334 | 3.48E-23 | 5.92E-21 |
| ENST00000501814 | -4.7715281       | 5.57507361 | 4.41E-23 | 7.07E-21 |
| ENST00000387069 | 2.88000334       | 7.98544088 | 1.05E-22 | 1.59E-20 |
| ENST00000499697 | -6.237872        | 4.12010598 | 2.61E-22 | 3.74E-20 |
| ENST00000364931 | 3.89948308       | 6.04014189 | 4.80E-22 | 6.54E-20 |
| ENST00000500633 | -9.2241885       | 3.63955347 | 7.29E-22 | 9.47E-20 |
| ENST00000501902 | -4.7969183       | 4.17051274 | 3.29E-20 | 4.07E-18 |
| ENST00000410796 | -4.6862754       | 4.64623249 | 3.77E-20 | 4.46E-18 |
| ENST00000499378 | -5.4583808       | 3.92387549 | 2.04E-19 | 2.32E-17 |
| ENST00000500409 | -9.8624629       | 4.21691173 | 4.95E-19 | 5.40E-17 |
| hsa-mir-155-5p  | 3.52873956       | 7.51758678 | 6.21E-17 | 6.51E-15 |
| ENST00000501823 | -5.5412794       | 3.46885925 | 6.64E-17 | 6.71E-15 |
| ENST00000499246 | -4.4128849       | 3.88553396 | 1.41E-16 | 1.37E-14 |
| ENST00000489202 | -2.0432881       | 9.60189313 | 1.80E-16 | 1.65E-14 |
| ENST00000487032 | -6.1991892       | 3.26726365 | 1.81E-16 | 1.65E-14 |
| ENST00000499572 | -6.2197907       | 3.28847732 | 1.74E-15 | 1.53E-13 |
| ENST00000493956 | -1.8994194       | 10.3113906 | 2.07E-15 | 1.71E-13 |

|                  |            |            |          |          |
|------------------|------------|------------|----------|----------|
| hsa-mir-95-3p    | -4.0836044 | 4.44949291 | 2.04E-15 | 1.71E-13 |
| ENST00000500011  | -4.7208856 | 3.6160936  | 1.26E-14 | 1.01E-12 |
| ENST00000500207  | -4.358338  | 3.59231343 | 1.29E-14 | 1.01E-12 |
| ENST00000479561  | -5.1508234 | 3.11944306 | 1.40E-14 | 1.06E-12 |
| ENST00000500974  | -6.1617595 | 3.22220249 | 4.23E-14 | 3.11E-12 |
| ENST00000362698  | 1.91947327 | 10.1657886 | 4.38E-14 | 3.14E-12 |
| ENST00000471114  | -2.9486    | 6.09287896 | 4.50E-14 | 3.14E-12 |
| ENST00000463737  | -1.840831  | 9.05938019 | 2.08E-13 | 1.41E-11 |
| ENST00000408749  | 3.03049298 | 3.9651975  | 3.24E-13 | 2.15E-11 |
| ENST00000362477  | 2.09944223 | 12.9737847 | 5.86E-13 | 3.80E-11 |
| ENST00000480364  | -2.9251468 | 4.06870358 | 1.41E-12 | 8.94E-11 |
| ENST00000476674  | -1.7606676 | 9.06129522 | 2.22E-12 | 1.38E-10 |
| ENST00000498894  | -4.3108507 | 2.86982444 | 5.75E-12 | 3.48E-10 |
| ENST00000387943  | 2.74251907 | 3.98372816 | 8.06E-12 | 4.72E-10 |
| ENST00000493141  | -2.5795824 | 5.08283812 | 8.14E-12 | 4.72E-10 |
| hsa-mir-7974-3p  | 2.68734105 | 4.70596784 | 1.77E-11 | 1.00E-09 |
| ENST00000501120  | -4.0162958 | 3.27773559 | 2.21E-11 | 1.23E-09 |
| ENST00000500692  | 2.77787533 | 3.67234095 | 2.48E-11 | 1.35E-09 |
| ENST00000500159  | -2.5853253 | 6.21428391 | 3.12E-11 | 1.67E-09 |
| ENST00000499784  | -3.9924618 | 3.23547885 | 3.24E-11 | 1.70E-09 |
| ENST00000459577  | 2.82577617 | 3.53064118 | 3.80E-11 | 1.95E-09 |
| ENST00000491379  | -1.8511292 | 11.3457992 | 4.17E-11 | 2.10E-09 |
| ENST00000500638  | -4.2350374 | 3.20059877 | 5.76E-11 | 2.85E-09 |
| ENST00000479524  | -1.5068463 | 11.6912322 | 7.37E-11 | 3.59E-09 |
| hsa-mir-486-5p   | -3.2339158 | 5.77801071 | 8.19E-11 | 3.91E-09 |
| ENST00000458546  | 2.68808286 | 3.73907334 | 3.89E-10 | 1.83E-08 |
| hsa-mir-151a-5p  | -1.8772712 | 8.07772689 | 4.42E-10 | 2.04E-08 |
| ENST00000500895  | 2.29285298 | 5.20135621 | 6.29E-10 | 2.86E-08 |
| ENST00000468873  | 4.76568043 | 1.98446314 | 1.10E-09 | 4.91E-08 |
| ENST00000468972  | -2.6863254 | 4.74267284 | 1.89E-09 | 8.33E-08 |
| ENST00000491707  | -2.2134725 | 4.40618161 | 2.17E-09 | 9.40E-08 |
| hsa-mir-1268a-5p | 2.87177723 | 6.35822025 | 4.06E-09 | 1.73E-07 |
| ENST00000501850  | -7.6164757 | 2.21113201 | 4.32E-09 | 1.81E-07 |
| ENST00000458811  | 1.66559972 | 7.7472053  | 5.07E-09 | 2.09E-07 |
| ENST00000489722  | -2.0677501 | 6.76232869 | 5.49E-09 | 2.23E-07 |
| ENST00000363299  | 2.16106309 | 4.12894523 | 9.01E-09 | 3.61E-07 |
| hsa-mir-370-3p   | 1.80117284 | 12.8494747 | 1.10E-08 | 4.33E-07 |
| hsa-mir-181b-5p  | 1.41270378 | 9.38154731 | 1.20E-08 | 4.59E-07 |
| ENST00000471237  | 1.28296732 | 15.2386133 | 1.19E-08 | 4.59E-07 |
| ENST00000502135  | -3.5132479 | 3.04844036 | 1.55E-08 | 5.85E-07 |
| hsa-mir-30a-3p   | 1.42499341 | 9.33629931 | 2.25E-08 | 8.27E-07 |
| ENST00000463508  | 1.34812505 | 14.61626   | 2.22E-08 | 8.27E-07 |

|                 |            |            |          |          |
|-----------------|------------|------------|----------|----------|
| hsa-mir-30c-3p  | 1.69819288 | 7.56258663 | 2.78E-08 | 1.01E-06 |
| ENST00000499568 | -7.5500741 | 2.1513785  | 3.09E-08 | 1.11E-06 |
| ENST00000458878 | -2.0555745 | 4.31910846 | 3.62E-08 | 1.28E-06 |
| hsa-mir-296-3p  | 2.07993264 | 6.4962092  | 4.35E-08 | 1.52E-06 |
| ENST00000365574 | 2.0246057  | 4.73414323 | 4.90E-08 | 1.69E-06 |
| ENST00000470405 | -4.2171166 | 2.34762162 | 5.86E-08 | 2.00E-06 |
| ENST00000499710 | -2.3062156 | 3.93657061 | 6.10E-08 | 2.05E-06 |
| ENST00000488123 | -1.3130879 | 9.76908093 | 6.56E-08 | 2.18E-06 |
| ENST00000478633 | -1.9130988 | 4.71513617 | 7.23E-08 | 2.37E-06 |
| ENST00000501900 | -3.6867265 | 2.34685001 | 7.43E-08 | 2.41E-06 |
| ENST00000410413 | 1.92298101 | 5.39950237 | 9.20E-08 | 2.95E-06 |
| ENST00000501562 | -3.5250938 | 2.56729469 | 1.02E-07 | 3.25E-06 |
| hsa-mir-574-5p  | 1.48975868 | 9.34133457 | 1.04E-07 | 3.26E-06 |
| ENST00000498924 | -7.0875579 | 1.78034364 | 1.27E-07 | 3.93E-06 |
| hsa-mir-140-3p  | 1.7335045  | 10.9575549 | 1.30E-07 | 3.99E-06 |
| ENST00000364315 | 1.28593357 | 10.0481341 | 1.89E-07 | 5.72E-06 |
| ENST00000365160 | 1.80390275 | 8.55620724 | 2.84E-07 | 8.49E-06 |
| ENST00000363473 | 1.25435026 | 10.1133356 | 3.47E-07 | 1.03E-05 |
| ENST00000365651 | 1.24450109 | 10.1060991 | 3.61E-07 | 1.06E-05 |
| hsa-mir-199a-5p | 1.40919422 | 11.2283677 | 3.98E-07 | 1.14E-05 |
| ENST00000362400 | 1.24998787 | 10.1115027 | 3.98E-07 | 1.14E-05 |
| ENST00000364485 | 1.24345564 | 10.110176  | 4.20E-07 | 1.19E-05 |
| ENST00000365387 | 1.23693655 | 10.1101666 | 4.29E-07 | 1.19E-05 |
| ENST00000496486 | -1.5278123 | 8.0442122  | 4.26E-07 | 1.19E-05 |
| ENST00000501284 | -4.7447122 | 2.04265976 | 4.75E-07 | 1.31E-05 |
| ENST00000363500 | 1.2429061  | 10.1188156 | 4.86E-07 | 1.31E-05 |
| ENST00000363511 | 1.24055935 | 10.1120828 | 4.89E-07 | 1.31E-05 |
| ENST00000365055 | 1.23396478 | 10.1117068 | 4.80E-07 | 1.31E-05 |
| ENST00000362482 | 1.23677057 | 10.1150521 | 4.97E-07 | 1.32E-05 |
| ENST00000365656 | 1.24795224 | 10.1198936 | 5.11E-07 | 1.34E-05 |
| ENST00000491757 | -4.7875326 | 2.07684369 | 5.19E-07 | 1.35E-05 |
| ENST00000410545 | 1.79246238 | 4.04309693 | 5.41E-07 | 1.38E-05 |
| ENST00000364718 | 1.23921032 | 10.1182194 | 5.47E-07 | 1.38E-05 |
| ENST00000363040 | 1.23716877 | 10.116484  | 5.45E-07 | 1.38E-05 |
| ENST00000362464 | 1.23029785 | 10.1118974 | 5.61E-07 | 1.40E-05 |
| ENST00000363439 | -1.9641995 | 4.22276    | 5.88E-07 | 1.46E-05 |
| ENST00000363962 | -2.4559651 | 3.62044251 | 6.02E-07 | 1.48E-05 |
| ENST00000410396 | 1.26057446 | 9.00405978 | 6.08E-07 | 1.48E-05 |
| ENST00000362526 | 1.22476261 | 10.1149981 | 6.42E-07 | 1.55E-05 |
| ENST00000500227 | -3.5324171 | 2.24426493 | 6.52E-07 | 1.56E-05 |
| ENST00000362467 | 1.22916448 | 10.1161574 | 6.70E-07 | 1.59E-05 |
| ENST00000363754 | 1.22115097 | 10.1149084 | 7.70E-07 | 1.81E-05 |

|                 |            |            |          |            |
|-----------------|------------|------------|----------|------------|
| ENST00000500354 | -3.6578144 | 2.3403254  | 9.73E-07 | 2.27E-05   |
| hsa-mir-93-5p   | 1.22336317 | 8.93274674 | 1.00E-06 | 2.31E-05   |
| hsa-mir-148b-3p | 1.15934817 | 10.2534097 | 1.01E-06 | 2.31E-05   |
| ENST00000468070 | -3.5107553 | 2.20411814 | 1.09E-06 | 2.49E-05   |
| ENST00000385582 | 1.23866771 | 8.52772963 | 1.46E-06 | 3.29E-05   |
| ENST00000384619 | 1.49742109 | 7.48804456 | 1.79E-06 | 3.98E-05   |
| ENST00000363194 | -1.8599273 | 4.36656733 | 1.79E-06 | 3.98E-05   |
| ENST00000499695 | -4.646819  | 1.96524786 | 1.93E-06 | 4.23E-05   |
| ENST00000483476 | -1.0673597 | 13.6295245 | 2.04E-06 | 4.45E-05   |
| ENST00000502161 | -4.9530197 | 2.20990629 | 2.17E-06 | 4.70E-05   |
| ENST00000500662 | -4.9529586 | 2.20990629 | 2.23E-06 | 4.79E-05   |
| hsa-mir-3152-5p | 3.36671724 | 1.61664232 | 3.47E-06 | 7.39E-05   |
| hsa-mir-4485-3p | -2.689358  | 2.5829417  | 3.53E-06 | 7.45E-05   |
| hsa-mir-708-3p  | -3.1906294 | 3.46468936 | 3.56E-06 | 7.45E-05   |
| hsa-mir-222-3p  | 1.15560805 | 10.1437786 | 3.71E-06 | 7.68E-05   |
| ENST00000489326 | -1.656772  | 4.29426118 | 3.72E-06 | 7.68E-05   |
| ENST00000364768 | -1.7805194 | 4.23848196 | 4.15E-06 | 8.50E-05   |
| ENST00000410569 | -6.764632  | 1.52405263 | 4.28E-06 | 8.71E-05   |
| ENST00000365559 | -6.7976591 | 1.55238868 | 4.71E-06 | 9.51E-05   |
| ENST00000500404 | 1.84640436 | 6.50014497 | 4.76E-06 | 9.53E-05   |
| hsa-mir-15b-3p  | 1.9546445  | 5.45378447 | 5.14E-06 | 0.0001022  |
| ENST00000363792 | -1.8088429 | 3.99200046 | 5.23E-06 | 0.00010324 |
| hsa-mir-1246-5p | -1.3806952 | 8.23635229 | 5.63E-06 | 0.0001104  |
| ENST00000499345 | -3.031555  | 2.15358452 | 5.83E-06 | 0.00011338 |
| ENST00000362455 | -6.7582051 | 1.52039468 | 5.87E-06 | 0.00011343 |
| ENST00000363450 | 1.60989132 | 5.37174053 | 5.92E-06 | 0.00011355 |
| hsa-mir-99b-3p  | 1.46203501 | 7.71125258 | 6.11E-06 | 0.00011647 |
| hsa-mir-548o-3p | 1.54226436 | 4.74400811 | 7.37E-06 | 0.00013953 |
| ENST00000493731 | -1.6443995 | 4.09017482 | 7.70E-06 | 0.00014478 |
| ENST00000481041 | -2.5395072 | 2.76712574 | 8.04E-06 | 0.00015009 |
| ENST00000465317 | 2.21148127 | 4.1676105  | 8.18E-06 | 0.00015168 |
| ENST00000500146 | -2.6159888 | 2.91159398 | 9.37E-06 | 0.00017255 |
| hsa-mir-10b-5p  | -2.772604  | 3.33150945 | 9.65E-06 | 0.00017643 |
| ENST00000499533 | -3.9414127 | 2.0544393  | 1.07E-05 | 0.00019353 |
| ENST00000362704 | 1.61706472 | 5.83286367 | 1.10E-05 | 0.00019767 |
| ENST00000365659 | 1.55482888 | 5.55879886 | 1.10E-05 | 0.00019782 |
| ENST00000494556 | -1.8536269 | 3.7985992  | 1.19E-05 | 0.00021129 |
| ENST00000463081 | -1.1453147 | 10.8874028 | 1.24E-05 | 0.00021896 |
| ENST00000365604 | 2.51143289 | 2.11769952 | 1.30E-05 | 0.00022692 |
| ENST00000364361 | -6.7089123 | 1.48389683 | 1.31E-05 | 0.00022692 |
| ENST00000410731 | -6.708915  | 1.48389683 | 1.31E-05 | 0.00022692 |
| ENST00000486381 | -4.2177871 | 1.58864627 | 1.32E-05 | 0.00022846 |

|                 |            |            |          |            |
|-----------------|------------|------------|----------|------------|
| ENST00000498581 | -1.1086904 | 9.42571376 | 1.34E-05 | 0.00023025 |
| ENST00000362344 | -1.8080798 | 4.29165601 | 1.37E-05 | 0.00023377 |
| ENST00000364588 | -4.0203207 | 1.45389843 | 1.40E-05 | 0.00023649 |
| hsa-mir-942-5p  | 2.00042264 | 3.35201375 | 1.65E-05 | 0.00027585 |
| ENST00000492114 | -1.6921241 | 6.65009671 | 1.66E-05 | 0.00027585 |
| ENST00000500497 | -3.1081996 | 1.88128112 | 1.66E-05 | 0.00027585 |
| hsa-mir-19b-3p  | -1.5340734 | 5.28368723 | 1.68E-05 | 0.00027823 |
| ENST00000384782 | 1.15966977 | 8.1700955  | 1.85E-05 | 0.00030366 |
| ENST00000482200 | -1.7450701 | 4.03750106 | 1.95E-05 | 0.00031772 |
| hsa-mir-30b-3p  | 3.48090475 | 1.41045816 | 1.98E-05 | 0.00032045 |
| hsa-mir-345-5p  | 1.4626902  | 5.20057942 | 2.03E-05 | 0.00032403 |
| ENST00000365328 | 1.44128458 | 6.93090914 | 2.03E-05 | 0.00032403 |
| ENST00000383869 | 1.14518767 | 8.17205729 | 2.03E-05 | 0.00032403 |
| ENST00000384278 | 1.15852424 | 8.15582244 | 2.14E-05 | 0.00033906 |
| hsa-mir-484-5p  | 1.16031735 | 8.23310207 | 2.19E-05 | 0.00034541 |
| ENST00000410216 | -1.8037428 | 3.73475249 | 2.22E-05 | 0.00034781 |
| ENST00000498986 | -4.2861001 | 1.66600641 | 2.43E-05 | 0.00037872 |
| ENST00000481141 | 1.58159778 | 3.72904833 | 2.62E-05 | 0.00040499 |
| ENST00000501686 | -3.3662084 | 2.13493693 | 2.65E-05 | 0.00040875 |
| ENST00000495906 | -1.9782097 | 3.84514509 | 2.69E-05 | 0.00041174 |
| ENST00000383861 | 1.13198617 | 8.17213817 | 2.76E-05 | 0.00041961 |
| ENST00000384010 | 1.14078282 | 8.1606643  | 2.77E-05 | 0.00041985 |
| ENST00000501339 | -3.3921885 | 2.42798878 | 2.86E-05 | 0.00043028 |
| ENST00000362928 | -1.6792479 | 4.24760185 | 2.92E-05 | 0.00043775 |
| ENST00000383925 | 1.1347115  | 8.1475996  | 3.14E-05 | 0.00046716 |
| ENST00000501370 | -2.897481  | 1.73247189 | 3.19E-05 | 0.00046976 |
| ENST00000498933 | -3.5754084 | 1.81276424 | 3.18E-05 | 0.00046976 |
| hsa-mir-151b-3p | -1.8806675 | 3.16921848 | 3.65E-05 | 0.00053546 |
| ENST00000384659 | 1.1101939  | 8.15944562 | 4.03E-05 | 0.00058737 |
| ENST00000491516 | -1.9652676 | 3.41330876 | 4.26E-05 | 0.00061734 |
| ENST00000472187 | -1.1356968 | 8.6127352  | 4.41E-05 | 0.00063545 |
| ENST00000476122 | -1.4257584 | 6.45808907 | 4.82E-05 | 0.00069067 |
| ENST00000363251 | -1.6074727 | 4.02741528 | 4.89E-05 | 0.0006934  |
| ENST00000498896 | -2.4580441 | 2.40450442 | 4.87E-05 | 0.0006934  |
| ENST00000482497 | -1.0770838 | 8.30244531 | 5.09E-05 | 0.00071828 |
| ENST00000499098 | -4.3811791 | 1.75008569 | 5.26E-05 | 0.0007395  |
| hsa-mir-618-5p  | 1.41818364 | 6.39361017 | 5.50E-05 | 0.00076436 |
| ENST00000408454 | 2.1491004  | 3.30815673 | 5.53E-05 | 0.0007653  |
| ENST00000364533 | 1.4745312  | 4.02073955 | 6.31E-05 | 0.00086854 |
| ENST00000467195 | -3.1755212 | 1.50972451 | 6.60E-05 | 0.00089896 |
| ENST00000410801 | -1.6698403 | 3.78087568 | 6.66E-05 | 0.00090233 |
| ENST00000500582 | -6.0486201 | 0.9901303  | 7.00E-05 | 0.0009448  |

|                 |            |            |            |            |
|-----------------|------------|------------|------------|------------|
| ENST00000410597 | -1.6953052 | 3.98269934 | 7.09E-05   | 0.00095116 |
| ENST00000363766 | -3.0523841 | 2.19888556 | 7.48E-05   | 0.00099972 |
| ENST00000500818 | -6.3698644 | 1.22330814 | 7.94E-05   | 0.00105541 |
| hsa-mir-4488-5p | -3.1077845 | 1.46133358 | 8.69E-05   | 0.00114426 |
| ENST00000410533 | 1.4150905  | 5.21230125 | 8.80E-05   | 0.00115269 |
| ENST00000491227 | -1.5381742 | 4.03491134 | 8.89E-05   | 0.00115955 |
| hsa-mir-503-5p  | 1.63872079 | 4.7957352  | 8.96E-05   | 0.00116213 |
| ENST00000502035 | -3.5490206 | 1.8077447  | 9.00E-05   | 0.00116213 |
| ENST00000362540 | -1.4113216 | 4.16406765 | 9.28E-05   | 0.00119326 |
| ENST00000364447 | -3.1952047 | 1.52398396 | 9.46E-05   | 0.00121013 |
| hsa-mir-541-5p  | 3.10917188 | 1.45415412 | 0.00010348 | 0.00130544 |
| hsa-mir-1301-3p | 1.41930139 | 3.82585188 | 0.0001034  | 0.00130544 |
| ENST00000364774 | -1.5300341 | 4.12336793 | 0.00010443 | 0.00131137 |
| ENST00000486026 | -3.7352413 | 1.2432024  | 0.00010892 | 0.00136154 |
| ENST00000469345 | 2.06279423 | 2.31206    | 0.00011016 | 0.00137073 |
| ENST00000364469 | -1.4798791 | 4.08287175 | 0.00011968 | 0.00147566 |
| ENST00000478479 | -1.4972727 | 4.13743729 | 0.00011931 | 0.00147566 |
| hsa-mir-23a-5p  | 1.7096033  | 3.32736541 | 0.00012183 | 0.00149545 |
| hsa-mir-493-5p  | 1.09975725 | 11.2857676 | 0.00012408 | 0.00151617 |
| ENST00000499059 | 1.72698377 | 3.29352841 | 0.00012629 | 0.00152947 |
| hsa-mir-1468-5p | 1.62685116 | 3.18861315 | 0.00012893 | 0.00155455 |
| hsa-mir-584-5p  | 1.69548612 | 7.74266974 | 0.0001297  | 0.00155698 |
| ENST00000500977 | -2.5210959 | 2.06174321 | 0.00013205 | 0.00157821 |
| ENST00000499115 | -2.0605118 | 2.54620396 | 0.00013529 | 0.00160983 |
| hsa-mir-324-3p  | 1.35979376 | 3.97382916 | 0.00013818 | 0.0016371  |
| ENST00000496990 | 2.16751164 | 2.17625884 | 0.00014159 | 0.00167027 |
| ENST00000364009 | 1.49549402 | 4.21669467 | 0.00014361 | 0.00167863 |
| hsa-mir-485-5p  | -1.2722113 | 6.60366137 | 0.00014314 | 0.00167863 |
| ENST00000463796 | 1.03488313 | 11.5300793 | 0.00015113 | 0.0017523  |
| ENST00000363301 | -1.3879946 | 4.62847115 | 0.00015176 | 0.0017523  |
| ENST00000488256 | -1.6260008 | 3.32952181 | 0.00015264 | 0.00175498 |
| ENST00000459543 | 2.59782855 | 1.55610232 | 0.00015426 | 0.00175881 |
| ENST00000478663 | 1.39138761 | 3.91158529 | 0.00015376 | 0.00175881 |
| ENST00000411315 | 1.3590231  | 5.26100949 | 0.00015704 | 0.00178305 |
| ENST00000385575 | 1.29326304 | 6.53449527 | 0.00015904 | 0.00178944 |
| ENST00000471568 | -1.6048548 | 4.01364969 | 0.00015957 | 0.00178944 |
| ENST00000410292 | -5.9059433 | 0.88997714 | 0.00018151 | 0.00201257 |
| ENST00000502160 | -5.9059283 | 0.88997714 | 0.00018173 | 0.00201257 |
| hsa-mir-193b-5p | -1.6688828 | 3.22271413 | 0.0001871  | 0.0020558  |
| hsa-mir-4473-3p | 1.28498723 | 4.79833518 | 0.00018808 | 0.00205831 |
| hsa-mir-887-3p  | 3.10840259 | 1.14762708 | 0.00019325 | 0.00210647 |
| ENST00000408376 | 1.80776189 | 2.61694978 | 0.00020182 | 0.0021911  |



|                 |            |            |            |            |
|-----------------|------------|------------|------------|------------|
| ENST00000502206 | -2.9570414 | 1.35501737 | 0.00020471 | 0.00221363 |
| ENST00000362779 | 1.37937455 | 5.83801703 | 0.0002067  | 0.00221758 |
| ENST00000362487 | -1.5587263 | 4.03489965 | 0.00020618 | 0.00221758 |
| hsa-mir-197-3p  | -1.3131803 | 7.27010192 | 0.00021154 | 0.0022606  |
| ENST00000364393 | -1.8118341 | 3.1203466  | 0.00021391 | 0.00227696 |
| ENST00000390997 | 1.75130598 | 2.63720521 | 0.00021778 | 0.00230917 |
| hsa-mir-3662-3p | 2.7312484  | 1.19227108 | 0.000222   | 0.00231874 |
| ENST00000408563 | -1.338273  | 4.34017387 | 0.00022069 | 0.00231874 |
| ENST00000501149 | -2.6275085 | 1.53860035 | 0.00022209 | 0.00231874 |
| ENST00000411366 | -2.7233574 | 1.941637   | 0.00021994 | 0.00231874 |
| ENST00000470561 | 1.30820825 | 6.51299953 | 0.00022584 | 0.00233997 |
| hsa-mir-455-5p  | -1.0253149 | 8.40858811 | 0.00022543 | 0.00233997 |
| ENST00000468500 | -1.2565255 | 4.59211904 | 0.00023337 | 0.00240883 |
| ENST00000500970 | 2.56435563 | 1.73595082 | 0.00023636 | 0.00243048 |
| ENST00000363046 | 1.00477935 | 8.11784289 | 0.00024191 | 0.00247825 |
| ENST00000363220 | -1.3512849 | 5.07181507 | 0.00024354 | 0.00248556 |
| ENST00000499220 | 3.73614844 | 0.59035348 | 0.00024511 | 0.0024923  |
| ENST00000363286 | 1.02052136 | 10.1023914 | 0.00024905 | 0.00252286 |
| ENST00000363331 | -1.8484618 | 3.06080568 | 0.00025003 | 0.00252347 |
| ENST00000363257 | -1.4175604 | 5.09240838 | 0.00025157 | 0.00252965 |
| ENST00000499917 | 1.52136691 | 3.57489322 | 0.00025414 | 0.00254102 |
| ENST00000365617 | -1.3756621 | 4.72369394 | 0.00025457 | 0.00254102 |
| hsa-mir-375-3p  | 1.57664561 | 3.2616424  | 0.00025717 | 0.00255764 |
| ENST00000472473 | -3.5205203 | 1.09546875 | 0.00026861 | 0.00265208 |
| hsa-mir-3182-5p | -1.5517922 | 3.79604674 | 0.00028049 | 0.00275938 |
| ENST00000467798 | -1.4128086 | 3.93235929 | 0.00028703 | 0.00281353 |
| ENST00000499978 | -2.1927214 | 2.93183049 | 0.00029249 | 0.00285675 |
| ENST00000500358 | -2.5234147 | 2.03916467 | 0.00029851 | 0.00290515 |
| hsa-mir-744-5p  | 1.08203187 | 8.35982316 | 0.00030336 | 0.00294187 |
| ENST00000487309 | 1.91850566 | 4.24948024 | 0.0003136  | 0.00303039 |
| ENST00000473668 | 1.87173442 | 2.25404348 | 0.00031528 | 0.00303585 |
| hsa-mir-708-5p  | -2.1947644 | 5.14300026 | 0.00032376 | 0.00309564 |
| ENST00000363120 | 1.26061439 | 4.99591666 | 0.00034141 | 0.00324165 |
| ENST00000500611 | -3.5158238 | 1.09135249 | 0.00034309 | 0.00324621 |
| ENST00000363444 | 1.51731547 | 5.18157939 | 0.00034939 | 0.00329442 |
| ENST00000501042 | 1.61457141 | 3.24248856 | 0.00035258 | 0.00331305 |
| ENST00000411347 | -4.0414024 | 1.49492549 | 0.00036154 | 0.00338555 |
| ENST00000410669 | -1.3434586 | 4.28248121 | 0.00038563 | 0.0035865  |
| ENST00000465779 | -2.1568142 | 2.5115169  | 0.00039033 | 0.00361786 |
| ENST00000365172 | 1.21069284 | 4.84134004 | 0.00039274 | 0.00362781 |
| ENST00000364377 | -1.5412179 | 3.71649953 | 0.00040604 | 0.003738   |
| ENST00000485927 | -1.2263625 | 6.6514813  | 0.0004098  | 0.00375991 |

|                 |            |            |            |            |
|-----------------|------------|------------|------------|------------|
| hsa-mir-3613-5p | -1.5488364 | 3.35984732 | 0.00042027 | 0.00384303 |
| ENST00000365254 | -2.9413549 | 1.78088942 | 0.00047695 | 0.0043323  |
| ENST00000363593 | 1.31375659 | 3.7127704  | 0.00047904 | 0.00433679 |
| ENST00000462216 | -1.9520778 | 2.29853132 | 0.00048751 | 0.00439886 |
| ENST00000363849 | -5.6533356 | 0.72826726 | 0.00049047 | 0.00441098 |
| ENST00000501275 | -2.9889109 | 1.39512836 | 0.00054637 | 0.00489756 |
| ENST00000362354 | -3.085927  | 1.44640243 | 0.00056096 | 0.00501187 |
| ENST00000461333 | -1.4708686 | 3.34393101 | 0.00056798 | 0.00504386 |
| ENST00000501646 | -2.4220828 | 1.71844745 | 0.00056824 | 0.00504386 |
| ENST00000408481 | 1.7314443  | 2.40188786 | 0.00060292 | 0.00533427 |
| ENST00000384067 | 1.25210923 | 4.55202753 | 0.0006103  | 0.00538211 |
| ENST00000500755 | -2.8385438 | 1.27106519 | 0.00063488 | 0.0055808  |
| ENST00000499816 | -3.401201  | 1.01540314 | 0.00066096 | 0.00579141 |
| ENST00000364948 | -1.0823486 | 7.55419757 | 0.00066537 | 0.00581129 |
| ENST00000462564 | 1.382318   | 3.40031827 | 0.00068227 | 0.00593991 |
| ENST00000501116 | -2.390249  | 1.9448266  | 0.00070231 | 0.00609493 |
| ENST00000475601 | -1.4674071 | 3.41593265 | 0.00070608 | 0.00610814 |
| ENST00000489070 | 1.20652311 | 4.19263191 | 0.00073322 | 0.00630294 |
| hsa-mir-511-5p  | -2.7466006 | 1.64257105 | 0.00073267 | 0.00630294 |
| hsa-mir-107-3p  | 1.16533456 | 6.17399824 | 0.00074048 | 0.00631674 |
| ENST00000363915 | -1.4883771 | 3.44568688 | 0.00074036 | 0.00631674 |
| ENST00000501853 | -3.5651466 | 1.11611019 | 0.0007441  | 0.00631674 |
| hsa-mir-431-3p  | 1.35258912 | 4.02620513 | 0.00078003 | 0.00658076 |
| ENST00000362607 | 1.24991892 | 3.72170556 | 0.00078867 | 0.00663308 |
| ENST00000472430 | -2.8340661 | 1.26712692 | 0.00079127 | 0.00663449 |
| ENST00000475473 | 2.53595781 | 1.06825741 | 0.00079862 | 0.00666063 |
| hsa-mir-215-5p  | -1.841813  | 2.3437931  | 0.00079928 | 0.00666063 |
| ENST00000499222 | -2.0550548 | 2.26073513 | 0.00080867 | 0.00671838 |
| ENST00000365096 | -1.2358346 | 4.72842128 | 0.00081128 | 0.00671955 |
| ENST00000363044 | -1.4891118 | 3.34208285 | 0.00083417 | 0.00688819 |
| ENST00000501427 | -2.292912  | 1.87495923 | 0.00084431 | 0.00695093 |
| ENST00000401297 | 1.69477267 | 2.51535134 | 0.00085108 | 0.00698551 |
| ENST00000459083 | 1.25914504 | 3.64408859 | 0.00085597 | 0.00700458 |
| hsa-mir-1185-3p | 1.2880938  | 7.11957783 | 0.00087711 | 0.00715056 |
| ENST00000434673 | -2.160891  | 1.98425595 | 0.00087906 | 0.00715056 |
| ENST00000501348 | -2.7370605 | 1.63544307 | 0.00089856 | 0.0072874  |
| hsa-mir-5701-5p | -1.1914123 | 4.42761827 | 0.00090634 | 0.00732869 |
| hsa-mir-664a-3p | -1.4716213 | 4.99137307 | 0.00091801 | 0.00740114 |
| ENST00000499712 | -2.2887879 | 1.87165116 | 0.00093366 | 0.00750505 |
| ENST00000501075 | -2.9466177 | 1.76737726 | 0.00096951 | 0.00777034 |
| ENST00000364259 | 1.67153634 | 3.02324103 | 0.00098772 | 0.00789305 |
| ENST00000478832 | -1.2278188 | 4.28339762 | 0.00099338 | 0.00791509 |

|                 |            |            |            |            |
|-----------------|------------|------------|------------|------------|
| ENST00000364819 | -1.2807557 | 3.91105731 | 0.00105016 | 0.00831887 |
| ENST00000390833 | 1.16178459 | 4.38826612 | 0.00119831 | 0.00943756 |
| ENST00000485828 | -1.5097125 | 3.34272042 | 0.0012937  | 0.01010122 |
| ENST00000466944 | -1.9444302 | 2.19913041 | 0.0013499  | 0.01050992 |
| hsa-mir-451a-5p | -2.7420408 | 1.65095276 | 0.00136904 | 0.01062856 |
| ENST00000486576 | -2.6484962 | 1.14351228 | 0.00145213 | 0.01120982 |
| ENST00000473410 | -1.1773283 | 4.12128516 | 0.00148139 | 0.01140338 |
| hsa-mir-19a-3p  | -1.5870712 | 3.13100314 | 0.00158022 | 0.01212984 |
| ENST00000385607 | 1.23653028 | 6.03385287 | 0.00161054 | 0.01232787 |
| hsa-mir-16-3p   | 1.07966243 | 7.24707542 | 0.00166196 | 0.01268582 |
| ENST00000500979 | -2.2235735 | 1.58133689 | 0.00166822 | 0.01269805 |
| ENST00000500702 | -1.8813232 | 1.96087343 | 0.00175319 | 0.01330762 |
| hsa-mir-485-3p  | -1.1520128 | 6.90399412 | 0.00180068 | 0.01355483 |
| ENST00000365138 | -1.5872017 | 2.97342248 | 0.001854   | 0.01387953 |
| hsa-mir-142-3p  | -3.2426574 | 0.91154941 | 0.00187578 | 0.01396584 |
| ENST00000410482 | 1.0730523  | 6.51894512 | 0.00188824 | 0.01402028 |
| ENST00000408061 | 1.1025582  | 5.32007165 | 0.00191691 | 0.0141945  |
| hsa-mir-3620-5p | 5.55263457 | 0.34274823 | 0.00195546 | 0.01431177 |
| ENST00000391230 | -5.3385188 | 0.52889982 | 0.00195702 | 0.01431177 |
| ENST00000499775 | -5.3385557 | 0.53356019 | 0.00195706 | 0.01431177 |
| ENST00000501399 | -5.3385557 | 0.53356019 | 0.00195706 | 0.01431177 |
| hsa-mir-30d-3p  | 1.99542423 | 1.87687993 | 0.00196426 | 0.01431177 |
| hsa-mir-3591-3p | -2.2627082 | 1.85512094 | 0.00197743 | 0.01433829 |
| ENST00000499758 | -2.4362199 | 1.75706302 | 0.00197842 | 0.01433829 |
| ENST00000476606 | -3.1347616 | 0.84120754 | 0.00199767 | 0.01443874 |
| ENST00000501304 | -3.1347611 | 0.84120754 | 0.00200288 | 0.01443874 |
| hsa-mir-425-3p  | 1.05207222 | 5.26599099 | 0.00201149 | 0.01446255 |
| ENST00000410856 | 1.2668668  | 3.28389195 | 0.00205799 | 0.01475792 |
| ENST00000499055 | 1.24411412 | 5.82579551 | 0.00208583 | 0.01487926 |
| ENST00000500809 | -2.5793812 | 1.09955108 | 0.00208287 | 0.01487926 |
| ENST00000384323 | 2.16100308 | 1.54844148 | 0.00209458 | 0.01490267 |
| hsa-mir-874-3p  | 1.03289018 | 4.43945321 | 0.00210811 | 0.014921   |
| hsa-mir-625-3p  | -1.3860652 | 3.46060033 | 0.00210308 | 0.014921   |
| ENST00000384110 | -1.3506422 | 3.30444737 | 0.00212205 | 0.01498081 |
| hsa-mir-183-5p  | -1.7709135 | 2.00665335 | 0.00217338 | 0.01530355 |
| ENST00000362911 | -1.2414336 | 3.96774894 | 0.00222655 | 0.01559731 |
| hsa-mir-184-3p  | -1.4511774 | 2.84196246 | 0.00225745 | 0.01577324 |
| ENST00000384413 | 1.17504932 | 4.83893241 | 0.00226472 | 0.01578353 |
| ENST00000411012 | 1.10194993 | 6.29000873 | 0.00236829 | 0.01646327 |
| ENST00000364916 | -1.6138043 | 2.67547565 | 0.00242982 | 0.01684801 |
| ENST00000363091 | -1.2256    | 6.19280821 | 0.00257102 | 0.01769197 |
| ENST00000496134 | 1.69574595 | 1.97449923 | 0.00262789 | 0.01800512 |

|                  |            |            |            |            |
|------------------|------------|------------|------------|------------|
| hsa-mir-1287-5p  | 1.21613533 | 3.24071056 | 0.00263831 | 0.01801856 |
| ENST00000500202  | -2.2560105 | 1.85181704 | 0.00275369 | 0.01866618 |
| ENST00000496828  | -1.779033  | 2.35926098 | 0.00282138 | 0.01907757 |
| ENST00000458893  | 1.13414697 | 5.35182259 | 0.00284919 | 0.0192179  |
| ENST00000463779  | -2.7083111 | 1.20184096 | 0.00292255 | 0.01966404 |
| hsa-mir-431-5p   | 1.23767926 | 6.67559801 | 0.00295438 | 0.01982926 |
| hsa-mir-1255a-5p | 1.62424089 | 2.37095407 | 0.00297793 | 0.01993823 |
| ENST00000363656  | -1.1183146 | 4.32380303 | 0.00305751 | 0.02042085 |
| ENST00000365668  | -1.5465863 | 2.86977676 | 0.00310941 | 0.02071673 |
| ENST00000475825  | -1.7687249 | 2.57190061 | 0.00315694 | 0.02098211 |
| ENST00000365202  | -1.08566   | 4.32976874 | 0.00328702 | 0.02174059 |
| ENST00000410717  | -1.2194645 | 5.09695894 | 0.00330127 | 0.021782   |
| ENST00000499483  | 1.4511991  | 2.72053745 | 0.00331239 | 0.02180258 |
| ENST00000480526  | 1.41236038 | 2.82281114 | 0.00342581 | 0.02221714 |
| ENST00000383990  | -1.8146419 | 2.06428636 | 0.00339532 | 0.02221714 |
| ENST00000500023  | -2.5295854 | 1.50967347 | 0.00340344 | 0.02221714 |
| hsa-mir-584-3p   | 2.78001927 | 0.59039656 | 0.0034277  | 0.02221714 |
| ENST00000486970  | -3.0435797 | 0.79036017 | 0.00343245 | 0.02221714 |
| ENST00000366303  | 2.22730992 | 1.09666933 | 0.00348833 | 0.02249049 |
| hsa-mir-671-3p   | -1.0118211 | 5.14193165 | 0.00349118 | 0.02249049 |
| ENST00000386847  | 1.0634885  | 4.13843949 | 0.00356284 | 0.022898   |
| ENST00000460738  | 1.51048567 | 2.18650775 | 0.00358856 | 0.02300897 |
| ENST00000363925  | -1.341823  | 2.81399533 | 0.00366157 | 0.02342201 |
| ENST00000362765  | -1.543323  | 2.4840504  | 0.003672   | 0.02343372 |
| ENST00000500043  | -2.8660188 | 1.32886806 | 0.00388906 | 0.02455972 |
| ENST00000365598  | -5.2162092 | 0.45409388 | 0.0039114  | 0.02455972 |
| ENST00000462879  | -5.2162707 | 0.46353833 | 0.00391153 | 0.02455972 |
| ENST00000500893  | -5.2162707 | 0.46353833 | 0.00391153 | 0.02455972 |
| ENST00000408548  | 2.03021884 | 1.35678069 | 0.00393661 | 0.02466036 |
| ENST00000364102  | 1.38007555 | 3.58693783 | 0.00395926 | 0.02474539 |
| ENST00000363341  | -1.0634174 | 5.95590965 | 0.00397496 | 0.02477677 |
| ENST00000363964  | -1.3656806 | 2.90804931 | 0.00398247 | 0.02477677 |
| ENST00000365498  | -1.8827408 | 1.56671403 | 0.00404995 | 0.02508206 |
| ENST00000364648  | -2.1082358 | 1.76389948 | 0.00404504 | 0.02508206 |
| ENST00000478019  | -1.195793  | 5.12997893 | 0.00407047 | 0.02515199 |
| ENST00000384240  | -2.565047  | 1.08720246 | 0.00420723 | 0.02582139 |
| ENST00000363738  | -1.2036978 | 3.47119196 | 0.00424103 | 0.0259121  |
| ENST00000401270  | 1.39519433 | 2.48480253 | 0.00434566 | 0.02649202 |
| hsa-mir-7704-5p  | -1.274768  | 3.56278126 | 0.00437439 | 0.02660762 |
| hsa-mir-142-5p   | -3.3904702 | 1.0275996  | 0.00442285 | 0.02684244 |
| hsa-mir-671-5p   | 1.11232542 | 5.49934089 | 0.00455825 | 0.02760272 |
| ENST00000500738  | -2.6441435 | 1.15946104 | 0.00458213 | 0.02768579 |

|                  |            |            |            |            |
|------------------|------------|------------|------------|------------|
| ENST00000485443  | -1.3772678 | 2.90307732 | 0.0046616  | 0.02810369 |
| ENST00000384547  | 1.62986686 | 1.74044037 | 0.00479675 | 0.02866763 |
| ENST00000364914  | 1.25087176 | 2.98822613 | 0.00481854 | 0.02866763 |
| ENST00000362750  | 1.21522214 | 3.01969783 | 0.00482348 | 0.02866763 |
| ENST00000362645  | -1.0755227 | 4.57706474 | 0.00477888 | 0.02866763 |
| hsa-mir-1262-5p  | 1.28622554 | 2.69814926 | 0.0048447  | 0.0286996  |
| ENST00000484912  | -1.0134339 | 5.52898334 | 0.00488921 | 0.02890043 |
| ENST00000499698  | 2.69521806 | 0.90930486 | 0.0049497  | 0.02913159 |
| ENST00000384268  | -1.6592686 | 2.25701486 | 0.00497239 | 0.0292021  |
| ENST00000410980  | -2.3448526 | 0.94945386 | 0.00503681 | 0.02951679 |
| ENST00000499508  | 1.11911975 | 3.57410672 | 0.00523393 | 0.03042629 |
| ENST00000362710  | -1.2042591 | 3.41084074 | 0.00523667 | 0.03042629 |
| hsa-mir-140-5p   | 1.04030061 | 9.25573387 | 0.00530717 | 0.03070494 |
| hsa-mir-3656-3p  | -2.6493403 | 1.1635554  | 0.00533411 | 0.03079546 |
| hsa-mir-130b-3p  | 1.16190927 | 3.2557388  | 0.00538143 | 0.03093757 |
| ENST00000499543  | -1.4388118 | 2.95220193 | 0.0056961  | 0.03247254 |
| ENST00000500134  | -1.9257973 | 1.36266923 | 0.0059773  | 0.03400449 |
| hsa-mir-1268b-5p | 2.60729253 | 1.06963217 | 0.00603717 | 0.03423295 |
| ENST00000384033  | 1.47686849 | 2.43591012 | 0.00616613 | 0.03486037 |
| ENST00000501159  | -2.8415075 | 0.66787422 | 0.00636513 | 0.03583765 |
| ENST00000501903  | -2.8415582 | 0.67242247 | 0.00636529 | 0.03583765 |
| ENST00000410818  | -2.94596   | 0.72374509 | 0.00642186 | 0.03606986 |
| ENST00000498954  | -2.9459457 | 0.72374509 | 0.00644625 | 0.03606986 |
| ENST00000466665  | -1.0630098 | 4.67205675 | 0.00655654 | 0.03653206 |
| ENST00000501206  | -1.7853928 | 1.89317003 | 0.00655609 | 0.03653206 |
| ENST00000363788  | -2.1016513 | 1.4985247  | 0.00658247 | 0.03653206 |
| ENST00000363674  | -2.3765755 | 1.38745013 | 0.00665547 | 0.03686211 |
| hsa-mir-219a-3p  | 1.67692744 | 1.57414531 | 0.00693486 | 0.03833163 |
| hsa-mir-1180-3p  | 1.06393831 | 6.73862232 | 0.00704317 | 0.03885151 |
| hsa-mir-214-5p   | 1.064867   | 6.22961415 | 0.00730609 | 0.04013933 |
| ENST00000481252  | -1.040668  | 4.00320355 | 0.00735157 | 0.04028543 |
| ENST00000363985  | -1.320262  | 2.6660802  | 0.00736225 | 0.04028543 |
| ENST00000384793  | 2.07050255 | 1.01512287 | 0.00743485 | 0.04060114 |
| hsa-mir-548j-5p  | 1.39870811 | 2.78110095 | 0.00772186 | 0.04202572 |
| ENST00000410798  | -1.0742447 | 3.5686781  | 0.00781116 | 0.04202572 |
| ENST00000384138  | -1.6540743 | 2.08572691 | 0.00779415 | 0.04202572 |
| ENST00000502153  | 5.19886194 | 0.16148587 | 0.00781547 | 0.04202572 |
| hsa-mir-6720-5p  | 5.19888875 | 0.17023781 | 0.00781559 | 0.04202572 |
| ENST00000499262  | -5.0826208 | 0.38481433 | 0.0078191  | 0.04202572 |
| ENST00000499793  | -5.0826208 | 0.38481433 | 0.0078191  | 0.04202572 |
| ENST00000364448  | -1.5291869 | 2.47343712 | 0.00784543 | 0.04208424 |
| hsa-mir-410-5p   | 1.91847468 | 1.13103552 | 0.00788336 | 0.04220464 |

|                 |            |            |            |            |
|-----------------|------------|------------|------------|------------|
| ENST00000499894 | -1.0272028 | 3.72897165 | 0.0078995  | 0.04220812 |
| hsa-mir-3687-3p | 1.65684972 | 2.06611224 | 0.00791526 | 0.04220955 |
| hsa-mir-3129-5p | 1.63804052 | 1.65757689 | 0.00797044 | 0.04230675 |
| hsa-mir-937-3p  | -2.270518  | 1.31339442 | 0.00798352 | 0.04230675 |
| ENST00000408778 | 1.99816632 | 1.34107669 | 0.00805991 | 0.04256443 |
| ENST00000499388 | 1.17658915 | 3.00078733 | 0.00814345 | 0.04292244 |
| ENST00000501058 | -2.2607384 | 0.90284971 | 0.00819724 | 0.04312254 |
| ENST00000499580 | 1.87347027 | 1.27329054 | 0.00822868 | 0.04320454 |
| ENST00000487740 | -1.4698786 | 2.37469789 | 0.00833283 | 0.04366726 |
| ENST00000501092 | -1.6309254 | 1.79057377 | 0.00838047 | 0.04383258 |
| hsa-mir-454-5p  | 1.21591209 | 2.69981618 | 0.00860423 | 0.04491673 |
| hsa-mir-489-3p  | -2.8584089 | 0.67697736 | 0.00863585 | 0.04499557 |
| ENST00000410718 | -1.0157142 | 4.02222203 | 0.00873103 | 0.04510764 |
| hsa-mir-122-5p  | -1.1517174 | 5.66040716 | 0.008692   | 0.04510764 |
| ENST00000384274 | -1.2762224 | 2.7480882  | 0.00872715 | 0.04510764 |
| ENST00000384119 | -1.6797934 | 2.17381662 | 0.00874012 | 0.04510764 |
| ENST00000444772 | -2.1770085 | 1.25084326 | 0.00867663 | 0.04510764 |
| ENST00000363130 | -1.0413318 | 4.36751379 | 0.0090048  | 0.04626247 |
| ENST00000365274 | -1.1144517 | 3.34878544 | 0.00905784 | 0.04639591 |
| hsa-mir-410-3p  | 1.06996518 | 6.23990616 | 0.00918523 | 0.0468722  |
| ENST00000364699 | -1.1167682 | 5.11893984 | 0.00920951 | 0.04690824 |
| hsa-mir-7976-5p | 1.46874658 | 2.08960229 | 0.00932278 | 0.04730835 |
| ENST00000384335 | -1.2105987 | 2.96270446 | 0.00937964 | 0.04750839 |
| ENST00000502222 | 2.25106935 | 0.92145927 | 0.00942941 | 0.04767185 |
| ENST00000364685 | -1.1793034 | 3.15559603 | 0.00959234 | 0.04822716 |
| ENST00000401362 | 1.90852444 | 1.84812229 | 0.00963427 | 0.04834877 |
| hsa-mir-29b-3p  | -1.2267061 | 3.0260013  | 0.00980254 | 0.0490127  |
| ENST00000385578 | 1.17313887 | 2.75019167 | 0.01003579 | 0.04990427 |
